# Supplementary material
Source: PubMed Central journal article supplement (PMC2758752)
Supplement: M800462-MCP200_1.pdf [file M800462-MCP200_1.pdf]

## Supplemental Tables

Supplemental TABLE SI

*Publicly available quantitation software for quantitative proteomics experiments*

| Software  | MS instrumentation                                                               | Input data format                                                                              | Labelling strategy                                                  | Quantitation strategy                                                                                   | Reference                                         |
|-----------|----------------------------------------------------------------------------------|------------------------------------------------------------------------------------------------|---------------------------------------------------------------------|---------------------------------------------------------------------------------------------------------|---------------------------------------------------|
| MSQuant   | QSTAR, QTOF, LTQ-FT                                                              | Mascot html result file                                                                        | SILAC ( $^{14}\text{N}/^{15}\text{N}$ possible with extra software) | Area under centroided MS <sup>1</sup> XIC of isotopomers                                                | (Schulze & Mann, 2004)                            |
| XPRESS    | LCQ, QTOF, MALDI-TOF-TOF                                                         | mzXML (part of the Trans-Proteomic Pipeline (TPP)), or in BioWorks package from ThermoFinnigan | ICAT (also SILAC, and metabolic labelling)                          | Area under MS <sup>1</sup> XIC of isotopomers                                                           | (Han <i>et al.</i> , 2001)                        |
| ASAPRatio | QTOF, LTQ, LTQ-FT, LTQ-Orbitrap                                                  | mzXML, part of TPP                                                                             | Stable isotopic labelling                                           | Area under MS <sup>1</sup> XIC of isotopomers                                                           | (Li <i>et al.</i> , 2003)                         |
| MFPaQ     | QSTAR                                                                            | Web-based application, Mascot result file and Analyst .wiff required                           | ICAT, SILAC                                                         | Peak intensity of MS <sup>1</sup> isotopomers                                                           | (Bouyssie <i>et al.</i> , 2007)                   |
| MaxQuant  | High resolution mass spectrometers (LTQ-Orbitrap)                                | Xcalibur .raw file                                                                             | Stable isotopic labelling especially SILAC, label free              | Intensity of MS <sup>1</sup> 3D-peaks (intensity vs. m/z vs. time) scans of isotopomers                 | (Cox & Mann, 2008; Graumann <i>et al.</i> , 2008) |
| RelEx     | ThermoFischer (.raw)                                                             | DTASelect output files (.out)                                                                  | $^{14}\text{N}/^{15}\text{N}$ metabolic labelling                   | Background-subtracted intensity ratio of MS <sup>1</sup> XIC of isotopomers                             | (MacCoss <i>et al.</i> , 2003)                    |
| Census    | Low and high-resolution mass spectrometers                                       | DTA Select output, mzXML, pepXML                                                               | Label free, stable isotopic labelling, iTRAQ                        | MS <sup>1</sup> based on RelEx, or MS <sup>2</sup> from single-reaction monitoring (SRM) scans or iTRAQ | (Park <i>et al.</i> , 2008)                       |
| QN        | High resolution hybrid ion trap mass spectrometer; LTQ-FT                        | SEQUEST data output                                                                            | $^{14}\text{N}/^{15}\text{N}$ metabolic labelling                   | Area under MS <sup>1</sup> XIC of isotopomers                                                           | (Andreev <i>et al.</i> , 2006)                    |
| MSight    | Applied Biosystems, Bruker, Waters, ABI-SCIEX, ThermoFinnigan mass spectrometers | mzXML                                                                                          | Label free                                                          | 2D representation of LC-MS data, similar to 2DE                                                         | (Palagi <i>et al.</i> , 2005)                     |

|               |                                                                          |                                             |                                  |                                                                                                                                                                                 |                                 |
|---------------|--------------------------------------------------------------------------|---------------------------------------------|----------------------------------|---------------------------------------------------------------------------------------------------------------------------------------------------------------------------------|---------------------------------|
| APEX          | Most                                                                     | protXML, part of TPP                        | Label free                       | Absolute quantitation by MS <sup>2</sup> spectral counting, corrected by machine learning-based prior expectation of observing each peptide based on physicochemical properties | (Lu <i>et al.</i> , 2006)       |
| MapQuant      | LTQ-FT                                                                   | .raw file                                   | Label free                       | MS <sup>1</sup> scans are converted into 2D maps (RT vs. m/z). Quantitation of 2D map features.                                                                                 | (Leptos <i>et al.</i> , 2006)   |
| PEPPer        | LTQ-Orbitrap, LTQ-FT                                                     | High resolution MS scans                    | Label free                       | Spectral feature quantitation by landmark and peak matching of MS <sup>1</sup> , uses MapQuant as part of the PEPPer pipeline                                                   | (Jaffe <i>et al.</i> , 2006)    |
| Masic         | Most                                                                     | .raw, mzXML, mzData, CDF and MGF file pairs | Label free                       | Accurate mass and time tag quantitation from MS <sup>1</sup>                                                                                                                    | (Monroe <i>et al.</i> , 2008)   |
| msInspect/AMT | Most                                                                     | mzXML and pepXML, part of TPP               | Label free                       | Accurate mass and time tag quantitation from MS <sup>1</sup>                                                                                                                    | (May <i>et al.</i> , 2007)      |
| SpecArray     | High resolution, high accuracy QTOF or similarly performing analyser     | mzXML                                       | Label free                       | Peptide array, quantitation of MS <sup>1</sup> single ion chromatograms based on ASAPRatio algorithm                                                                            | (Li <i>et al.</i> , 2005)       |
| ZoomQuant     | Ion trap mass spectrometers                                              | DTA Select .out files                       | <sup>18</sup> O labelling        | Isotopomer peak areas from MS <sup>1</sup>                                                                                                                                      | (Halligan <i>et al.</i> , 2005) |
| ProQuant      | QSTAR, QTrap; Applied Biosystems mass spectrometers                      | Raw data files                              | iTRAQ (4-plex)                   | Isotopomer peak area from MS <sup>2</sup> of reporter ions (114-117 m/z for 4-plex)                                                                                             | Applied Biosystems, 2004        |
| ProteinPilot  | QSTAR, QTrap; Applied Biosystems mass spectrometers                      | Raw data files                              | SILAC, iTRAQ (4-plex and 8-plex) | Isotopomer peak areas from MS <sup>1</sup> for SILAC. Isotopomer peak area from MS <sup>2</sup> of reporter ions (114-117 m/z for 4-plex, 113-121 m/z for 8-plex)               | Applied Biosystems, 2006        |
| Multi-Q       | Applied Biosystems, Bruker, Waters and ThermoFinnigan mass spectrometers | mzXML                                       | iTRAQ                            | Peak intensities of reporter ions in MS <sup>2</sup>                                                                                                                            | (Lin <i>et al.</i> , 2006)      |
| Libra         | Most, QTOF, QSTAR, TOF-TOF                                               | mzXML, part of TPP                          | iTRAQ                            | Peak intensities of reporter ions in MS <sup>2</sup>                                                                                                                            | (Keller <i>et al.</i> , 2005)   |

|               |             |                           |                                                       |                                                                                                                                 |                                  |
|---------------|-------------|---------------------------|-------------------------------------------------------|---------------------------------------------------------------------------------------------------------------------------------|----------------------------------|
| i-Tracker     | Most        | .dta or .mgf files        | iTRAQ                                                 | Area under report ion peaks in MS <sup>2</sup>                                                                                  | (Shadforth <i>et al.</i> , 2005) |
| <b>Mascot</b> | <b>Most</b> | <b>.dta or .mgf files</b> | <b>SILAC, 14N/15N metabolic labelling, 18O, iTRAQ</b> | <b>Area under MS<sup>1</sup> XIC of isotopmers, area under report ion peaks in MS<sup>2</sup> for iTRAQ, spectral counting.</b> | <b>Matrix Science, 2008</b>      |

Entries shaded in grey represent software packages available at the commencement of the current study in 2004. Bold entries represent software able to process <sup>14</sup>N/<sup>15</sup>N metabolic labelling experiments.

## Supplemental TABLE SII

*Linear modelling design matrix*

| Description of experiments |      |                 |                 |        |        | Indicator variables |        |
|----------------------------|------|-----------------|-----------------|--------|--------|---------------------|--------|
| Experiment                 | Name | <sup>14</sup> N | <sup>15</sup> N | Buffer | Biorep | 10°C vs 30°C        | buffer |
| 1                          | A1_1 | 10°C            | 30°C            | Tris   | A      | 1                   | 0      |
| 2                          | A1_2 | 10°C            | 30°C            | Tris   | A      | 1                   | 0      |
| 3                          | A2_1 | 10°C            | 30°C            | Tris   | A      | 1                   | 0      |
| 4                          | A2_2 | 10°C            | 30°C            | Tris   | A      | 1                   | 0      |
| 5                          | B1_1 | 30°C            | 10°C            | Tris   | B      | -1                  | 0      |
| 6                          | B1_2 | 30°C            | 10°C            | Tris   | B      | -1                  | 0      |
| 7                          | B2_1 | 30°C            | 10°C            | Tris   | B      | -1                  | 0      |
| 8                          | B2_2 | 30°C            | 10°C            | Tris   | B      | -1                  | 0      |
| 9                          | C1_1 | 10°C            | 30°C            | Urea   | C      | 1                   | 1      |
| 10                         | C1_2 | 10°C            | 30°C            | Urea   | C      | 1                   | 1      |
| 11                         | C2_1 | 10°C            | 30°C            | Urea   | C      | 1                   | 1      |
| 12                         | C2_2 | 10°C            | 30°C            | Urea   | C      | 1                   | 1      |
| 13                         | D1_1 | 30°C            | 10°C            | Urea   | D      | -1                  | 1      |
| 14                         | D1_2 | 30°C            | 10°C            | Urea   | D      | -1                  | 1      |
| 15                         | D2_1 | 30°C            | 10°C            | Urea   | D      | -1                  | 1      |
| 16                         | D2_2 | 30°C            | 10°C            | Urea   | D      | -1                  | 1      |
| 17                         | E_1  | 10°C            | 30°C            | Tris   | E      | 1                   | 0      |
| 18                         | E_2  | 10°C            | 30°C            | Tris   | E      | 1                   | 0      |
| 19                         | F_1  | 30°C            | 10°C            | Tris   | F      | -1                  | 0      |
| 20                         | F_2  | 30°C            | 10°C            | Tris   | F      | -1                  | 0      |

The linear model design matrix accounts for experimental variables including the experimental <sup>14</sup>N:<sup>15</sup>N label swap, where some 10°C samples are labeled with <sup>14</sup>N (+1) while others are labeled with <sup>15</sup>N (-1), the Tris (0) or urea (1) protein extraction buffer, and the number of technical replicates in each experiment (two for experiments E-F and four for experiments A-D). The biorep factor groups the experiments into biological replicates, and the technical replicates within each biological replicate are expected to have a higher correlation to each other than between biological replicates.

**Supplemental Table SII. *S. alaskensis* proteins identified using metabolic labeling and a GeLC-MS/MS platform**

2135 proteins were confidently identified in all MS experiments and are shown below.

Proteins were identified using the SEQUEST search algorithm in Bioworks BioBrowser (v 3.3) with the following search parameters against the *S. alaskensis* database: monoisotopic precursor and fragments mass type, fully enzymatic trypsin (KR) enzyme with allowance for one missed cleavage, and variable acrylamide, carbamidomethyl and oxidation modifications. For LCQ data files a 1.2 Da peptide tolerance and 0.6 Da fragment ion tolerance was used, while for LTQ data files a 0.8 Da peptide tolerance and 0.6 Da. The *S. alaskensis* database contains 3208 proteins.

Identifications were filtered using DTA Select based on the following parameters: DeltaCN of at least 0.08, a minimum XCorr of 2.1 for +1, 2.7 for +2, and 3.2 for +3 charged peptides.

The MS/MS were also interrogated against a decoy database (randomised *S. alaskensis*) with <1% false positive identification rate in DTA Select.

For each identified protein the following is shown: RefSeq accession number, locus tag, protein description, sequence coverage (%), number of peptides identified and identified peptides listed.

| Accession | Locus tag | Description                                         | Sequence coverage | No. peptides identified | List of peptides identified                                                                                                                                                                                                                                                                                                                                                                                                                                                                                                                                                                                                                                                                                                                                                                                                                                                                                                                                                                                                                                                                                                                                                                                                                                                                                                                                                                                                                                                                                                                                                                                                                                                                                                                                                                                                                                                                                                                                                                                                                                                                                                                                                                                                                                                                                                                                                                                                                                                                                                                                                                                                                                                                                                                                                                                                                                                                                                                                                   |
|-----------|-----------|-----------------------------------------------------|-------------------|-------------------------|-------------------------------------------------------------------------------------------------------------------------------------------------------------------------------------------------------------------------------------------------------------------------------------------------------------------------------------------------------------------------------------------------------------------------------------------------------------------------------------------------------------------------------------------------------------------------------------------------------------------------------------------------------------------------------------------------------------------------------------------------------------------------------------------------------------------------------------------------------------------------------------------------------------------------------------------------------------------------------------------------------------------------------------------------------------------------------------------------------------------------------------------------------------------------------------------------------------------------------------------------------------------------------------------------------------------------------------------------------------------------------------------------------------------------------------------------------------------------------------------------------------------------------------------------------------------------------------------------------------------------------------------------------------------------------------------------------------------------------------------------------------------------------------------------------------------------------------------------------------------------------------------------------------------------------------------------------------------------------------------------------------------------------------------------------------------------------------------------------------------------------------------------------------------------------------------------------------------------------------------------------------------------------------------------------------------------------------------------------------------------------------------------------------------------------------------------------------------------------------------------------------------------------------------------------------------------------------------------------------------------------------------------------------------------------------------------------------------------------------------------------------------------------------------------------------------------------------------------------------------------------------------------------------------------------------------------------------------------------|
| YP_615061 | Sala_0002 | glutathione S-transferase-like protein              | 62.33%            | 13                      | R.IYPAELTPEVQADVIR.I<br>R.IQLWAEAR.A<br>R.HSGLPFEEVTVPLYNQNR.R<br>R.FITYSILPR.F<br>R.REGDEFAPSGGK.V<br>R.FGEGDYLFQDWSAADMMPFVTR.F<br>R.RIYPAELTPEVQADVIR.I<br>R.EDGEFAPSGGK.V<br>K.AYSWSLR.G<br>R.FGEGDYLFQDWSAADMMPFVTR.F<br>R.FGEGDYLFQDWSAADMMPFVTR.F<br>R.EDGEFAPSGKVPILWGDADIVWDSLAIDYLNK.T<br>K.VPILWGDADIVWDSLAIDYLNK.T<br>R.TQELNYFDVGEPPVFR.L<br>K.SAPALQHLVPSVPEIAFAGR.S<br>R.FLINDYLR.G<br>K.SSLNALTNR.N<br>K.ILFSGPIAFK.S<br>R.KLFSGPIAFK.S<br>R.KHPAAHPEVIATSEK.G<br>K.QTVNAGTAPVLSLDFALDR.L<br>K.LTPTTPTVLSWNTTGTQFR.I<br>R.VTAAISSPATNNYQLFAR.D<br>R.DFTQVAPGQLIATSR.I<br>K.SVFDIDYDLEAPNR.S<br>R.LNPAPADPVQAVFK.I<br>K.EVEILETQDDQGITR.L<br>R.LFAPGGTAAAYFASLWTAQGIQLPGAGTVWTANGTK.L<br>R.GSINLVGAR.I<br>R.YTSAGWLGFDTKYWLAIVPAK.G<br>R.IEYSDIANYLITAK.Q<br>K.YWLAIVPAK.G<br>R.YTSAGWLGFDTK.Y<br>R.YKDDKPR.M<br>R.PVDVLAEGQR.I<br>R.LMFFIANR.Q<br>R.LGKPTDPHEVDSWTHVPTGYLDGK.S<br>K.LYKDEK.I<br>K.FPALKAAPAK.<br>R.FQAVVAEYLPFITATPDLAR.V<br>R.ALETEAPFTHYDEL.R.A<br>R.VLIEATSSDKAAAK.R<br>R.VLIEATSSDKA<br>K.WGVSWQITPR.V<br>K.IDIAIEAEAVR.G<br>R.WNELATSEPTAITFYQR.H<br>R.FYGAIVGWITIAHSDPGAPGGVDYR.M<br>R.APTIAAFAALEVAADADGAR.A<br>R.APTIAAFAALEVAADADGAR.A<br>R.FPGLIPATAEDR.G<br>R.EEALLDDAPAL.R<br>R.VVENWGDVDPDGK.I<br>K.ADETVVFSWFEYDPK.Q<br>K.DGETVFSWVEVPSR.E<br>R.ETGATGYVDGVPVPAIAKDR.Y<br>R.VVENWGDVDPDGKITDYAR.A<br>R.MIVGGFETLDDR.G<br>K.VNDFKGAQAK.A<br>K.MASEIFIEHGATR.V<br>R.MVEAVWGDVDPDGK.V<br>R.LFESAILHLAEKDER.L<br>R.EAVEAGLIEAEPK.L<br>R.ALDQAALFAEEAGPPA.<br>R.RPGLIDFIR.G<br>R.LNDAMGDKPVLTDFTVADIAMATVLR.E<br>R.ALDQAALFAE<br>R.PADHFLFQVWQVPLNDGGIR.L<br>R.LNDAMGDKPVLTDFTVADIAMATVLR.E<br>R.LNDAMGDKPVLTDFTVADIAMATVLR.E<br>R.LSPTDFAFDVAIAK.H<br>K.HIDSTPFAYSDAQLR.A<br>R.LDGVWPEVLEGIK.M<br>R.IAVHVGDPITSK.Q<br>K.VGGAFSDQMAADAAVLAASLR.V<br>K.TMILGDADGITFEHAIK.L<br>R.GGADIATATQGFMTQPPK.A<br>K.VGGAFSDQMAADAAVLAASLR.V<br>R.MIFVNLVPTLDR.S<br>R.EAVDQVQDK.A<br>K.ADPTFTQDFGMYGR.S<br>R.SFEDPDGHIWEMWMDPAIIPAGEPAEAAA.<br>R.EAVDQVQDKAVK.A<br>K.IAGLLDGSIEAK.T<br>R.ITGDVYETITTIENGK.V<br>R.ITGDVYETITTIENGKVDGK.L<br>R.VAETAADLEER.Q<br>R.GGPFIPFRGR.G<br>R.FNALQDHEIFVR.T<br>R.NITNDESPGTGDFNNLTSYVNEPR.I<br>R.GLNTDFDLNASQVSLVYDEVLENPLIK.G<br>K.GHGIEAELQAAPAR.G<br>R.EESLQDVPVSVLSGDTLGAITSTGADIR.A<br>R.YGTSQVEVAAGAADDNGFSVR.L<br>K.GFPFDLDRVEVLR.G<br>R.TDRFDVAAFVR.N<br>R.EESLQDVPVSVLSGDTLGAITSTGADIR.A<br>R.VISTADQEEETMSYEAGIK.T<br>R.LQLQYENSPFTGR.V<br>R.DKWVQDGINFQK.L<br>R.FNLTYGYFDTK.D<br>R.VPSLNISSYGR.S<br>R.VFDGSAILFR.A<br>R.PVETRPVFNPNTPVPPQSR.V<br>R.DDNWVDNIATKDDLGYYDIIAAR.L<br>R.LVGLGADTAFER.D<br>R.IWVGEAGVFE.<br>K.DLQTLAVGGTANVASLNVDAK.G<br>K.DDLGGYDIIAAR.L<br>R.GDIDGGFVAVLPVSGPLIPFAAQSDNVPVLDQFTQEIR.I<br>R.LVGLGADTAFERDK.V<br>R.LSGLYQHR.D<br>K.VWQDGINFQK.L<br>R.DDWVDNIATK.D<br>R.YNHDR.D<br>R.ANTQLPQSNR.L<br>K.LLWVASATWEASDAVTFYAR.V<br>R.LSGLYQHRDWVDNIATK.D<br>K.LNTYNAALNLEYDFGAVTAYSTYSWNGNFK.S<br>R.VISTADQEEETMSYEAGIK.T<br>R.FDVAAPVR.N<br>R.DFVAARPVETRPVFNPNTPVPPQSR.V |
| YP_615062 | Sala_0003 | GTP-binding                                         | 37.44%            | 7                       |                                                                                                                                                                                                                                                                                                                                                                                                                                                                                                                                                                                                                                                                                                                                                                                                                                                                                                                                                                                                                                                                                                                                                                                                                                                                                                                                                                                                                                                                                                                                                                                                                                                                                                                                                                                                                                                                                                                                                                                                                                                                                                                                                                                                                                                                                                                                                                                                                                                                                                                                                                                                                                                                                                                                                                                                                                                                                                                                                                               |
| YP_615063 | Sala_0004 | 60 kDa inner membrane insertion protein             | 46.92%            | 19                      |                                                                                                                                                                                                                                                                                                                                                                                                                                                                                                                                                                                                                                                                                                                                                                                                                                                                                                                                                                                                                                                                                                                                                                                                                                                                                                                                                                                                                                                                                                                                                                                                                                                                                                                                                                                                                                                                                                                                                                                                                                                                                                                                                                                                                                                                                                                                                                                                                                                                                                                                                                                                                                                                                                                                                                                                                                                                                                                                                                               |
| YP_615068 | Sala_0009 | glutathione S-transferase-like protein              | 15.91%            | 2                       |                                                                                                                                                                                                                                                                                                                                                                                                                                                                                                                                                                                                                                                                                                                                                                                                                                                                                                                                                                                                                                                                                                                                                                                                                                                                                                                                                                                                                                                                                                                                                                                                                                                                                                                                                                                                                                                                                                                                                                                                                                                                                                                                                                                                                                                                                                                                                                                                                                                                                                                                                                                                                                                                                                                                                                                                                                                                                                                                                                               |
| YP_615070 | Sala_0011 | 3-demethylubiquinone-9 3-methyltransferase          | 21.56%            | 4                       |                                                                                                                                                                                                                                                                                                                                                                                                                                                                                                                                                                                                                                                                                                                                                                                                                                                                                                                                                                                                                                                                                                                                                                                                                                                                                                                                                                                                                                                                                                                                                                                                                                                                                                                                                                                                                                                                                                                                                                                                                                                                                                                                                                                                                                                                                                                                                                                                                                                                                                                                                                                                                                                                                                                                                                                                                                                                                                                                                                               |
| YP_615071 | Sala_0012 | Glyoxalase/bleomycin resistance protein/dioxygenase | 16.10%            | 2                       |                                                                                                                                                                                                                                                                                                                                                                                                                                                                                                                                                                                                                                                                                                                                                                                                                                                                                                                                                                                                                                                                                                                                                                                                                                                                                                                                                                                                                                                                                                                                                                                                                                                                                                                                                                                                                                                                                                                                                                                                                                                                                                                                                                                                                                                                                                                                                                                                                                                                                                                                                                                                                                                                                                                                                                                                                                                                                                                                                                               |
| YP_615073 | Sala_0014 | glutathione S-transferase-like protein              | 22.42%            | 4                       |                                                                                                                                                                                                                                                                                                                                                                                                                                                                                                                                                                                                                                                                                                                                                                                                                                                                                                                                                                                                                                                                                                                                                                                                                                                                                                                                                                                                                                                                                                                                                                                                                                                                                                                                                                                                                                                                                                                                                                                                                                                                                                                                                                                                                                                                                                                                                                                                                                                                                                                                                                                                                                                                                                                                                                                                                                                                                                                                                                               |
| YP_615074 | Sala_0015 | protein of unknown function DUF1428                 | 50.42%            | 9                       |                                                                                                                                                                                                                                                                                                                                                                                                                                                                                                                                                                                                                                                                                                                                                                                                                                                                                                                                                                                                                                                                                                                                                                                                                                                                                                                                                                                                                                                                                                                                                                                                                                                                                                                                                                                                                                                                                                                                                                                                                                                                                                                                                                                                                                                                                                                                                                                                                                                                                                                                                                                                                                                                                                                                                                                                                                                                                                                                                                               |
| YP_615075 | Sala_0016 | glutathione S-transferase-like protein              | 46.88%            | 9                       |                                                                                                                                                                                                                                                                                                                                                                                                                                                                                                                                                                                                                                                                                                                                                                                                                                                                                                                                                                                                                                                                                                                                                                                                                                                                                                                                                                                                                                                                                                                                                                                                                                                                                                                                                                                                                                                                                                                                                                                                                                                                                                                                                                                                                                                                                                                                                                                                                                                                                                                                                                                                                                                                                                                                                                                                                                                                                                                                                                               |
| YP_615076 | Sala_0017 | alpha/beta hydrolase fold                           | 36.09%            | 8                       |                                                                                                                                                                                                                                                                                                                                                                                                                                                                                                                                                                                                                                                                                                                                                                                                                                                                                                                                                                                                                                                                                                                                                                                                                                                                                                                                                                                                                                                                                                                                                                                                                                                                                                                                                                                                                                                                                                                                                                                                                                                                                                                                                                                                                                                                                                                                                                                                                                                                                                                                                                                                                                                                                                                                                                                                                                                                                                                                                                               |
| YP_615078 | Sala_0019 | Glyoxalase/bleomycin resistance protein/dioxygenase | 48.61%            | 5                       |                                                                                                                                                                                                                                                                                                                                                                                                                                                                                                                                                                                                                                                                                                                                                                                                                                                                                                                                                                                                                                                                                                                                                                                                                                                                                                                                                                                                                                                                                                                                                                                                                                                                                                                                                                                                                                                                                                                                                                                                                                                                                                                                                                                                                                                                                                                                                                                                                                                                                                                                                                                                                                                                                                                                                                                                                                                                                                                                                                               |
| YP_615083 | Sala_0024 | protein of unknown function DUF583                  | 25.19%            | 3                       |                                                                                                                                                                                                                                                                                                                                                                                                                                                                                                                                                                                                                                                                                                                                                                                                                                                                                                                                                                                                                                                                                                                                                                                                                                                                                                                                                                                                                                                                                                                                                                                                                                                                                                                                                                                                                                                                                                                                                                                                                                                                                                                                                                                                                                                                                                                                                                                                                                                                                                                                                                                                                                                                                                                                                                                                                                                                                                                                                                               |
| YP_615084 | Sala_0025 | peptidase M23B                                      | 8.46%             | 3                       |                                                                                                                                                                                                                                                                                                                                                                                                                                                                                                                                                                                                                                                                                                                                                                                                                                                                                                                                                                                                                                                                                                                                                                                                                                                                                                                                                                                                                                                                                                                                                                                                                                                                                                                                                                                                                                                                                                                                                                                                                                                                                                                                                                                                                                                                                                                                                                                                                                                                                                                                                                                                                                                                                                                                                                                                                                                                                                                                                                               |
| YP_615086 | Sala_0027 | TonB-dependent receptor                             | 60.61%            | 35                      |                                                                                                                                                                                                                                                                                                                                                                                                                                                                                                                                                                                                                                                                                                                                                                                                                                                                                                                                                                                                                                                                                                                                                                                                                                                                                                                                                                                                                                                                                                                                                                                                                                                                                                                                                                                                                                                                                                                                                                                                                                                                                                                                                                                                                                                                                                                                                                                                                                                                                                                                                                                                                                                                                                                                                                                                                                                                                                                                                                               |

| Accession | Locus tag | Description                                                | Sequence coverage | No. peptides identified | List of peptides identified                                                                                                                                                                                                                                                                                                                                                                                                                                                                                                                                                                                                                                                                                                                                                                                                                                                                                                                                                                                                                                                                                                                                                                                                                                                                                                                                                                                                                                                                                                                                                                                                                                                                                                                                                                                                                                                                                                                                                                                                                                                                                                                                                                                                                                                                                                                                                                                                                                                                                                                                                                                                                                                                                                                                                                                                                                                                                                                                                                                                                                                                                                                                                                                                                                                                                                                                                                  |
|-----------|-----------|------------------------------------------------------------|-------------------|-------------------------|----------------------------------------------------------------------------------------------------------------------------------------------------------------------------------------------------------------------------------------------------------------------------------------------------------------------------------------------------------------------------------------------------------------------------------------------------------------------------------------------------------------------------------------------------------------------------------------------------------------------------------------------------------------------------------------------------------------------------------------------------------------------------------------------------------------------------------------------------------------------------------------------------------------------------------------------------------------------------------------------------------------------------------------------------------------------------------------------------------------------------------------------------------------------------------------------------------------------------------------------------------------------------------------------------------------------------------------------------------------------------------------------------------------------------------------------------------------------------------------------------------------------------------------------------------------------------------------------------------------------------------------------------------------------------------------------------------------------------------------------------------------------------------------------------------------------------------------------------------------------------------------------------------------------------------------------------------------------------------------------------------------------------------------------------------------------------------------------------------------------------------------------------------------------------------------------------------------------------------------------------------------------------------------------------------------------------------------------------------------------------------------------------------------------------------------------------------------------------------------------------------------------------------------------------------------------------------------------------------------------------------------------------------------------------------------------------------------------------------------------------------------------------------------------------------------------------------------------------------------------------------------------------------------------------------------------------------------------------------------------------------------------------------------------------------------------------------------------------------------------------------------------------------------------------------------------------------------------------------------------------------------------------------------------------------------------------------------------------------------------------------------------|
| YP_615087 | Sala_0028 | PepSY-associated TM helix                                  | 17.13%            | 4                       | R.APSVQGR.L<br>K.GFFIFDLDR.V<br>R.LAEGAGAYASQSGEIVTR.W<br>R.TTLWFDAATGDLGAR.D<br>R.GDLATVAATEK.L<br>K.LMAAQGTQGIYADER.F<br>R.SLAPFGQANLQAGLVR.L<br>R.AVPGLEALTIAGFDALWDSTEQR.L<br>R.TPQGVLDISFLDISPVSNNR.E<br>R.NDFEGYNTDAIVR.Y<br>R.AYASVAEGYTPVDVGR.I<br>K.ISIDDYTTLASAGR.T<br>R.VGINLTQGETQDSETLFLFGR.F<br>R.YQTSLGGVSLAVSNLFDQR.Q<br>R.YQTSLGGVSLAVSNLFDQR.Q<br>R.DTFGGEPNPIATFQDAAIAPIGTLFDQSQNR.S<br>R.QYISASDTQRPTDNFFNFAGR.G<br>R.FELEGDGYAAVAGNK.A<br>R.SRDTFGGEPNPIATFQDAAIAPIGTLFDQSQNR.S<br>R.GPLDASATYFVSSSK.K<br>R.TFVSGSPTFDDVLLGGVIVPEMPGIR.A<br>R.SPLYAINGIPQSTPLR.D<br>K.AAGLPTSARPGTPPGVPATNR.T<br>R.ALLQASADNDFSDGEMGK.V<br>R.TFTLGDWYRF.<br>R.LNLAAAYANGPLSAR.V<br>R.DGFTIDGFFVDR.V<br>R.FDASVGAWER.R<br>K.RGPLDASATYFVSSSK.K<br>R.QRVEIEGLEINLAVK.M<br>K.GQLLIARPDGIFDVQR.Q<br>R.VQTQFYLR.T<br>R.VELIFGSNALQIGGGIVNQVTGAPTDGVSGR.A<br>K.MPIDGLTLAGYAHIVYQFDDADGLVETLDGANISPD.R.L<br>R.RVGINLTQGETQDSETLFLFGR.F<br>R.RGVFFDGEGR.R<br>K.LSGAGETLR.G<br>R.TFTLGDWYRF.F<br>R.TESVSLSLDNLGGGNFISQIFWNR.S<br>R.ELGVEVK.R<br>K.VAGLVQYK.A<br>R.VIEGLEINLAVK.M<br>R.TPGVDISFLDISPVSNNRELVEVK.R<br>R.FGAVTDMR.L<br>K.DALDQIAIAGSVTDVATLSPSFSPTR.Q<br>R.TVGEAAQDEVR.A<br>K.LSAAVVEELAR.L<br>K.VAEETAKAEANDK.Q<br>K.VAEETAKAEANDK.Q<br>K.AAEAAADAAEATDAK.G<br>K.AAEAAADAAE<br>K.GAMEEAKK.<br>R.YFAEHAAEWDAIR.S<br>R.LGFSDAQIR.G<br>R.SDQDQPPVSDGGPTK.R<br>R.IVADGPIAIIAIAQADKWPFSAR.E<br>R.GGGHLLIVFAPHEDELR.T<br>R.SDQDQPPVSDGGPTK.R.L<br>R.RSDQDQPPVSDGGPTK.R<br>R.MAEIFAPAR.R<br>R.ILVEAGIVER.R<br>R.GWFAAGLLLETTQTLEGGK.L<br>R.LGHLLDIGTGR.M<br>R.HVAESEVEAAMLAMHNR.R<br>R.EMELAIAGLAVVLDQSQPR.V<br>R.AITQFFSPDSFLR.F<br>R.FRD7AAAGIDAPIPGILPVSNVSTQR.R<br>R.AHPDGYANAVELVAGLK.A<br>R.TLEPLAPSFVSTYAGAGSTR.E<br>R.DTAAAGIDAPIIPGILPVSNVSTQR.R<br>R.AYWDAGVR.H<br>K.MEAGLWDTFR.T<br>K.TLSLSPVWMPFR.E<br>R.NLSGHTVEAFWYVR.H<br>R.NAVYGVGDAEHLSDIPR.G<br>R.ISQADYGAEHLVAGINLASAR.L<br>K.AGIAATLEAEALGR.E<br>R.FVAGVAGPTNK.T<br>K.VLSIDADALVMVYPNAGLPNELGEYDELPTTAEVLR.E<br>R.ELPLMISMTLDSGR.N<br>R.RFVAGVAGPTNK.T<br>R.DYLVAGADIATNTFSANR.I<br>R.KVEGEELSPTER.L<br>R.AVGVALVSDTGR.D<br>R.FAEFAER.L<br>R.YKGTAAQEK.A<br>R.IGSDQLEDYAR.R<br>K.WSVIEAGLK.C<br>R.QQVENGAQIIVNMDEGLLDAEHAMTFLK.L<br>R.ANYDAYLSDKPPAPLQGLHR.F<br>K.AVAHLPTIEASKEPGAK.G<br>R.IDPQYQGVLVHLDASR.A<br>R.GVDLETATR.W<br>R.AWELHGTWPSLLQDEVVGETAR.A<br>K.EGEEQLDHA.K<br>K.ADADAMLQDQIAEQWLTAR.G<br>R.LLADQYAAAEVVAR.Q<br>K.LIAEPTIAR.V<br>R.TACEDVILNR.K<br>R.HGDDIVHIAEEER.H<br>K.ILEAANENDADMIGSLTTPSLDEMVTVAEMQR.A<br>K.GYKNDYAHVR.D<br>K.GQSVLSTIEAR.A<br>R.TTLWGYAGSQLTNEALIKEEYR.G<br>R.FRADKDDYSDILL.A<br>R.NSEQGILTADPEAALITDR.S<br>R.SVFVADWSGEALAGANELGAGLAR.F<br>R.LQDAVDAIGEGEGTIR.I<br>R.IAFVASEPGR.A<br>R.IIGNLFPVQSR.D<br>R.LETSDLVVNAEFR.N<br>R.DKENYSFAIAAEER.K<br>R.VDVSNSFDDTQGTGTNYMIDLPSTGSTR.I<br>R.VDGLVFNMR.V<br>R.ADDGVQLLAFPPDIR.V<br>K.TPHEAASLLETR.G<br>R.TAFSGSSTFSDALAK.A<br>K.AGVVTLVGDWVNGDPVITR.T<br>R.NSVPLVLYWAPGADKPEILPILTPGLMIDK.V<br>R.FAIPASVAIDAPHLFVETQVDVYAAPQR.F<br>R.AAVQAAPDK.A<br>R.FJASREADGAVLATAAALR.Q<br>R.ADETLLWAPTLGTSYR.G<br>R.IDTALDPEALGNEVAEK.L<br>R.AATVIAAANQPR.G<br>K.ARDPQAQVSVAGK.D<br>K.HLLVPTLGLMK.A<br>R.SDFIVALKPR.V<br>R.KAALAEILPR.L<br>K.AALAEILPR.L<br>R.TGVVANNYFDSLVAR.A<br>K.LGLPQLLHGGEGDYLSK.A<br>R.DELAAHPISR.R<br>R.VTPIAEPGVGYATHGSVWDYDR.R<br>R.RATAAQAPK.L<br>R.RAPDMWSVMDR.L<br>R.DPQAQVSVAGKDR.A<br>R.VYCAEDETVPTSSGSGK.Y |
| YP_615088 | Sala_0029 | TonB-dependent receptor                                    | 80.87%            | 38                      |                                                                                                                                                                                                                                                                                                                                                                                                                                                                                                                                                                                                                                                                                                                                                                                                                                                                                                                                                                                                                                                                                                                                                                                                                                                                                                                                                                                                                                                                                                                                                                                                                                                                                                                                                                                                                                                                                                                                                                                                                                                                                                                                                                                                                                                                                                                                                                                                                                                                                                                                                                                                                                                                                                                                                                                                                                                                                                                                                                                                                                                                                                                                                                                                                                                                                                                                                                                              |
| YP_615089 | Sala_0030 | Patatin                                                    | 2.73%             | 2                       |                                                                                                                                                                                                                                                                                                                                                                                                                                                                                                                                                                                                                                                                                                                                                                                                                                                                                                                                                                                                                                                                                                                                                                                                                                                                                                                                                                                                                                                                                                                                                                                                                                                                                                                                                                                                                                                                                                                                                                                                                                                                                                                                                                                                                                                                                                                                                                                                                                                                                                                                                                                                                                                                                                                                                                                                                                                                                                                                                                                                                                                                                                                                                                                                                                                                                                                                                                                              |
| YP_615091 | Sala_0032 | Entericidin EcnAB                                          | 14.29%            | 2                       |                                                                                                                                                                                                                                                                                                                                                                                                                                                                                                                                                                                                                                                                                                                                                                                                                                                                                                                                                                                                                                                                                                                                                                                                                                                                                                                                                                                                                                                                                                                                                                                                                                                                                                                                                                                                                                                                                                                                                                                                                                                                                                                                                                                                                                                                                                                                                                                                                                                                                                                                                                                                                                                                                                                                                                                                                                                                                                                                                                                                                                                                                                                                                                                                                                                                                                                                                                                              |
| YP_615092 | Sala_0033 | outer membrane protein                                     | 22.86%            | 3                       |                                                                                                                                                                                                                                                                                                                                                                                                                                                                                                                                                                                                                                                                                                                                                                                                                                                                                                                                                                                                                                                                                                                                                                                                                                                                                                                                                                                                                                                                                                                                                                                                                                                                                                                                                                                                                                                                                                                                                                                                                                                                                                                                                                                                                                                                                                                                                                                                                                                                                                                                                                                                                                                                                                                                                                                                                                                                                                                                                                                                                                                                                                                                                                                                                                                                                                                                                                                              |
| YP_615093 | Sala_0034 | transcriptional regulator, ArsR family                     | 56.40%            | 13                      |                                                                                                                                                                                                                                                                                                                                                                                                                                                                                                                                                                                                                                                                                                                                                                                                                                                                                                                                                                                                                                                                                                                                                                                                                                                                                                                                                                                                                                                                                                                                                                                                                                                                                                                                                                                                                                                                                                                                                                                                                                                                                                                                                                                                                                                                                                                                                                                                                                                                                                                                                                                                                                                                                                                                                                                                                                                                                                                                                                                                                                                                                                                                                                                                                                                                                                                                                                                              |
| YP_615094 | Sala_0035 | 5,10-methylenetetrahydrofolate reductase                   | 31.41%            | 7                       |                                                                                                                                                                                                                                                                                                                                                                                                                                                                                                                                                                                                                                                                                                                                                                                                                                                                                                                                                                                                                                                                                                                                                                                                                                                                                                                                                                                                                                                                                                                                                                                                                                                                                                                                                                                                                                                                                                                                                                                                                                                                                                                                                                                                                                                                                                                                                                                                                                                                                                                                                                                                                                                                                                                                                                                                                                                                                                                                                                                                                                                                                                                                                                                                                                                                                                                                                                                              |
| YP_615095 | Sala_0036 | 5-methyltetrahydrofolate--homocysteine S-methyltransferase | 47.04%            | 10                      |                                                                                                                                                                                                                                                                                                                                                                                                                                                                                                                                                                                                                                                                                                                                                                                                                                                                                                                                                                                                                                                                                                                                                                                                                                                                                                                                                                                                                                                                                                                                                                                                                                                                                                                                                                                                                                                                                                                                                                                                                                                                                                                                                                                                                                                                                                                                                                                                                                                                                                                                                                                                                                                                                                                                                                                                                                                                                                                                                                                                                                                                                                                                                                                                                                                                                                                                                                                              |
| YP_615096 | Sala_0037 | 5-methyltetrahydrofolate--homocysteine methyltransferase   | 40.66%            | 23                      |                                                                                                                                                                                                                                                                                                                                                                                                                                                                                                                                                                                                                                                                                                                                                                                                                                                                                                                                                                                                                                                                                                                                                                                                                                                                                                                                                                                                                                                                                                                                                                                                                                                                                                                                                                                                                                                                                                                                                                                                                                                                                                                                                                                                                                                                                                                                                                                                                                                                                                                                                                                                                                                                                                                                                                                                                                                                                                                                                                                                                                                                                                                                                                                                                                                                                                                                                                                              |
| YP_615097 | Sala_0038 | hypothetical protein                                       | 47.32%            | 9                       |                                                                                                                                                                                                                                                                                                                                                                                                                                                                                                                                                                                                                                                                                                                                                                                                                                                                                                                                                                                                                                                                                                                                                                                                                                                                                                                                                                                                                                                                                                                                                                                                                                                                                                                                                                                                                                                                                                                                                                                                                                                                                                                                                                                                                                                                                                                                                                                                                                                                                                                                                                                                                                                                                                                                                                                                                                                                                                                                                                                                                                                                                                                                                                                                                                                                                                                                                                                              |
| YP_615098 | Sala_0039 | hypothetical protein                                       | 19.08%            | 2                       |                                                                                                                                                                                                                                                                                                                                                                                                                                                                                                                                                                                                                                                                                                                                                                                                                                                                                                                                                                                                                                                                                                                                                                                                                                                                                                                                                                                                                                                                                                                                                                                                                                                                                                                                                                                                                                                                                                                                                                                                                                                                                                                                                                                                                                                                                                                                                                                                                                                                                                                                                                                                                                                                                                                                                                                                                                                                                                                                                                                                                                                                                                                                                                                                                                                                                                                                                                                              |
| YP_615102 | Sala_0043 | thiol:disulfide interchange protein                        | 15.45%            | 5                       |                                                                                                                                                                                                                                                                                                                                                                                                                                                                                                                                                                                                                                                                                                                                                                                                                                                                                                                                                                                                                                                                                                                                                                                                                                                                                                                                                                                                                                                                                                                                                                                                                                                                                                                                                                                                                                                                                                                                                                                                                                                                                                                                                                                                                                                                                                                                                                                                                                                                                                                                                                                                                                                                                                                                                                                                                                                                                                                                                                                                                                                                                                                                                                                                                                                                                                                                                                                              |
| YP_615103 | Sala_0044 | type I phosphodiesterase/nucleotide pyrophosphatase        | 64.35%            | 25                      |                                                                                                                                                                                                                                                                                                                                                                                                                                                                                                                                                                                                                                                                                                                                                                                                                                                                                                                                                                                                                                                                                                                                                                                                                                                                                                                                                                                                                                                                                                                                                                                                                                                                                                                                                                                                                                                                                                                                                                                                                                                                                                                                                                                                                                                                                                                                                                                                                                                                                                                                                                                                                                                                                                                                                                                                                                                                                                                                                                                                                                                                                                                                                                                                                                                                                                                                                                                              |

| <b>Accession</b> | <b>Locus tag</b> | <b>Description</b>                                                | <b>Sequence coverage</b> | <b>No. peptides identified</b> | <b>List of peptides identified</b>                                                                                                                                                                                                                                                                                                                                                                                                                                                                                                                                                                                                                                                                                                                                                                                                                                                                                                                                                                                                                                                                                                                                                                                                                                                                                                                                                                                                                                                                                                                                                                                                                                                                                                                                                                                                                                                                                                                                                                                                                                                                                                                                                                                                                                                                                                                                                                                                                                                                                                                                                                                                                                                                                                                                                                                                                                                                                                                                                                                                              |
|------------------|------------------|-------------------------------------------------------------------|--------------------------|--------------------------------|-------------------------------------------------------------------------------------------------------------------------------------------------------------------------------------------------------------------------------------------------------------------------------------------------------------------------------------------------------------------------------------------------------------------------------------------------------------------------------------------------------------------------------------------------------------------------------------------------------------------------------------------------------------------------------------------------------------------------------------------------------------------------------------------------------------------------------------------------------------------------------------------------------------------------------------------------------------------------------------------------------------------------------------------------------------------------------------------------------------------------------------------------------------------------------------------------------------------------------------------------------------------------------------------------------------------------------------------------------------------------------------------------------------------------------------------------------------------------------------------------------------------------------------------------------------------------------------------------------------------------------------------------------------------------------------------------------------------------------------------------------------------------------------------------------------------------------------------------------------------------------------------------------------------------------------------------------------------------------------------------------------------------------------------------------------------------------------------------------------------------------------------------------------------------------------------------------------------------------------------------------------------------------------------------------------------------------------------------------------------------------------------------------------------------------------------------------------------------------------------------------------------------------------------------------------------------------------------------------------------------------------------------------------------------------------------------------------------------------------------------------------------------------------------------------------------------------------------------------------------------------------------------------------------------------------------------------------------------------------------------------------------------------------------------|
|                  |                  |                                                                   |                          |                                | R.QNAWPDAQR.I<br>R.LDATGMNYAVVLTADHGHHDLPER.N<br>R.KDLAGFEQPNVMTVDIMPTLAAALIGLVPDAGAIIDGR.C<br>K.LKYPALVAGALCAGASGTYVQEAAPAAR.R<br>K.DLAGFEQPNVMTVDIMPTLAAALIGLVPDAGAIIDGR.C<br>R.RFLASPEADGAVLATAAARL.Q<br>R.GPLTPEACAAQDIAPLANGASVGTGR.M<br>R.DPQAQVVSAGK.D<br>K.LATATFGGATALLADSGEKPGTLIAQVASK.G<br>R.VAVDPLAAR.E<br>K.GTTQAGLVDLSDGQLAALLTIVLR.A<br>R.WLASGLGADR.V<br>R.LIESYAAAGER.L<br>R.LGLSAEDALK.L<br>R.GRELAELAR.G<br>R.ELAEJARG.G<br>R.ELAEJARG.G<br>R.ELAEJARG.G                                                                                                                                                                                                                                                                                                                                                                                                                                                                                                                                                                                                                                                                                                                                                                                                                                                                                                                                                                                                                                                                                                                                                                                                                                                                                                                                                                                                                                                                                                                                                                                                                                                                                                                                                                                                                                                                                                                                                                                                                                                                                                                                                                                                                                                                                                                                                                                                                                                                                                                                                                    |
| YP_615104        | Sala_0045        | pyrroline-5-carboxylate reductase                                 | 40.91%                   | 9                              | R.DAIITLAHDAGLTVR.E<br>R.GPLTDPATVLAHYAQIEFGLK.A<br>K.GHDQVFLDAAEHR.W<br>R.AAAIADPAFGR.V<br>R.MAMAEELPEELFIAAVK.E<br>K.SSAPASISLWSEYDTR.A<br>R.YTEGGQVHDAQVMPR.G<br>R.EEAYIDQWQDAESGR.L<br>R.DAIITLAHDAGLTVREAYIDQWQDAESGR.L<br>R.VFTDHMVSIR.Y<br>R.LDDGSMALFR.V<br>R.LHPSPVADQDR.A<br>K.SFTIGAGGQGVTEMLK.A<br>K.PASEYQLVITSPVGNFK.S<br>R.LTESFACGTAAVTPVVK.V<br>R.AADPHGVVTR.I<br>K.CGNYAASLQAQR.E<br>R.VFTDHMVSIR.Y<br>R.AADPHGVVTR.I<br>K.SFTIGAGGQGVTEMLK.A<br>R.SVEELTADVAVIGADEATAELEAIADR.Q<br>R.IEVANAQLAQAALSNSEASVK.A<br>K.AGLAEKL.V<br>R.TVGTIGAGGGLLGR.A<br>R.ENGTTLIIGAAGVGLGRELDDGR.D<br>R.LAESPTGVTITLEGDANGAPPDPAAAYK.K<br>R.SAQAFDNPDAVIAIHNYR.W<br>R.NITGGIGHNLPQAPK.A<br>R.NGQQAALQDVIALMDALR.I<br>K.LIWHIASPEWK.F<br>K.AFADAVLQAATPA.<br>R.SIVEAALAQGHNVVATAR.N<br>R.NPAVLEDAAR.Y<br>R.YSQLLAVR.L<br>R.LLYSSIGAR.I<br>R.IATAGVGYYPASK.A<br>R.DPDGVAAMILQVALDDPPSR.I<br>R.EAAQLATETGSAVATDSDGRDAVIAR.V<br>R.VNVTAPYHSAVEAR.Q<br>R.IIVIGSVNGDR.M<br>K.SVILVIGSR.G<br>R.VRESGLDLVNVNAGFALFGDALDLPDDVDR.L<br>R.EAAQLATETGSAVATDSDGR.D<br>R.ESGLDILVNVNAGFALFGDALDLPDDVDR.L<br>R.MPLGMASYSK.S<br>R.HGRPEEVAGMVAWLAGPEAFVTGMHTIDGAFGA.<br>K.VVFTYNGSR.E<br>R.RLEAWQQLAR.L<br>R.VLHSELGFGDDETYDAPVNADFI.R<br>R.GLPIALSILVYVAMAR.R<br>R.ASLGQEGGAALSAR.M<br>R.AEAEQKDHQR.G<br>R.APEAGPAASALALLAHQGLSIR.M<br>R.LATGELIER.R<br>K.JASDEVLSR.D<br>R.NIFGAFALMSDDIVR.A<br>R.DRENLEHSYR.I<br>R.LENLEHSYR.I<br>R.DEVIAEGLSILKPDDELK.I<br>R.DYWNFLVALA.A<br>R.GSAVDALVGGASDHG.<br>R.IILTGPEALSYDEVADR.I<br>K.TGALVAQQLTAR.G<br>R.QTTPAGDEDVPSK.H<br>R.LESGDGDGEDASNIYAITDPATNHK.G<br>R.APYQGDADAPDE.<br>R.TWLDVYSJAQLDR.S<br>R.TGETVQFNGR.D<br>K.SAVEEGAVIK.L<br>R.SEFIENDEQAQAEVASDLAEALDHTLDHYADKLEK.L<br>R.TGETVQFNGRDLLIVEDVE.<br>R.ETMLSLETAALHSAR.T<br>R.SEFIENDEQAQAEVASDLAEALDHTLDHYADK.L<br>R.LAEAWHTYVPYR.Y<br>R.VAHDVTGVR.C<br>K.QSVATLVDR.V<br>R.ETAVALIDAITAAR.A<br>R.AIGIPAAVAVDATGYLR.A<br>R.TDDAFPLVDVAIDK.A<br>R.IPPGQHLVFNPEFLTAPFPNVELADWK.F<br>K.VVWNSFALPK.T<br>R.LTDLFAQDPAAALALQSLALHDYVLPK.G<br>R.FAEPVFAAGLR.T<br>R.TMGDHMEDTAK.A<br>R.LAALKPVFDR.D<br>R.GFFDIALSIPELAR.D<br>R.LPILVITVTDQJIAIGR.S<br>R.AGPVVEVDGVQVMNR.V<br>R.LTVAEALLERPFYHPIIEGLR.T<br>R.LIGPVLVLSFFR.G<br>R.IPMPTATYVISTDGIIR.Y<br>R.SAHSIDSHLGHVFPDGR.D<br>R.HVTQEGGTER.A<br>R.FVHRDDMEAGEYSEFLNQLIEEN.<br>R.VGYSGGDPNATYR.N<br>R.SAIYYADEAQRQETLQTIADVNASGLWPGK.V<br>R.SAIYYADEAQR.E<br>R.ETALQTIADVNASGLWPGK.V<br>R.NHGTHAEATIEINFPDQISYRR.I<br>R.AAWVLSAGER.S<br>R.EDGSPPEPEFAEQVR.L<br>R.LLTVSQQVGSREDSPEPEFAEQVR.L<br>R.KGLPLDADGVLVPTGSLTAPGVFAAGDVTDK.I<br>K.LTGDGQVYLAETLVATGAQAK.W<br>K.MLLGSGPAGLSAIIYAR.A<br>K.VVIGGGNTAVEEALYLTNHSDDVTLIHR.R<br>K.WLGVPEQELGGK.G<br>K.MPSTHTKMLLIGSGPAGLSAIIYAR.A<br>R.FVAGEVSGLVGVLDITVGAASHEPTDGGFVIGHSPSTELFR.G<br>K.LPLDADGVLVPTGSLTAPGVFAAGDVTDKIYR.Q<br>K.VVIGGGNTAVEEALYLTNHSDDVTLIHRR.D<br>R.YLAEAYHAMVDA.<br>K.GVSACATCDGGFYR.G<br>R.NAAYVDPADWNALVDDPGVTLIDTR.N<br>R.NGFVYGSFAGVADPGTK.S<br>R.HGVEDVHLK.G<br>K.IVIVPETALR.I<br>R.GAEYVDFPK.V<br>R.VVEIAAAAQGR.I<br>K.EALHEVGVSTIVTEAK.G |
| YP_615106        | Sala_0047        | branched-chain amino acid aminotransferase                        | 65.65%                   | 20                             |                                                                                                                                                                                                                                                                                                                                                                                                                                                                                                                                                                                                                                                                                                                                                                                                                                                                                                                                                                                                                                                                                                                                                                                                                                                                                                                                                                                                                                                                                                                                                                                                                                                                                                                                                                                                                                                                                                                                                                                                                                                                                                                                                                                                                                                                                                                                                                                                                                                                                                                                                                                                                                                                                                                                                                                                                                                                                                                                                                                                                                                 |
| YP_615108        | Sala_0049        | hypothetical protein                                              | 5.11%                    | 3                              |                                                                                                                                                                                                                                                                                                                                                                                                                                                                                                                                                                                                                                                                                                                                                                                                                                                                                                                                                                                                                                                                                                                                                                                                                                                                                                                                                                                                                                                                                                                                                                                                                                                                                                                                                                                                                                                                                                                                                                                                                                                                                                                                                                                                                                                                                                                                                                                                                                                                                                                                                                                                                                                                                                                                                                                                                                                                                                                                                                                                                                                 |
| YP_615124        | Sala_0065        | 17 kDa surface antigen                                            | 27.15%                   | 2                              |                                                                                                                                                                                                                                                                                                                                                                                                                                                                                                                                                                                                                                                                                                                                                                                                                                                                                                                                                                                                                                                                                                                                                                                                                                                                                                                                                                                                                                                                                                                                                                                                                                                                                                                                                                                                                                                                                                                                                                                                                                                                                                                                                                                                                                                                                                                                                                                                                                                                                                                                                                                                                                                                                                                                                                                                                                                                                                                                                                                                                                                 |
| YP_615134        | Sala_0075        | Twin-arginine translocation pathway signal                        | 31.14%                   | 6                              |                                                                                                                                                                                                                                                                                                                                                                                                                                                                                                                                                                                                                                                                                                                                                                                                                                                                                                                                                                                                                                                                                                                                                                                                                                                                                                                                                                                                                                                                                                                                                                                                                                                                                                                                                                                                                                                                                                                                                                                                                                                                                                                                                                                                                                                                                                                                                                                                                                                                                                                                                                                                                                                                                                                                                                                                                                                                                                                                                                                                                                                 |
| YP_615137        | Sala_0078        | short-chain dehydrogenase/reductase SDR                           | 28.98%                   | 6                              |                                                                                                                                                                                                                                                                                                                                                                                                                                                                                                                                                                                                                                                                                                                                                                                                                                                                                                                                                                                                                                                                                                                                                                                                                                                                                                                                                                                                                                                                                                                                                                                                                                                                                                                                                                                                                                                                                                                                                                                                                                                                                                                                                                                                                                                                                                                                                                                                                                                                                                                                                                                                                                                                                                                                                                                                                                                                                                                                                                                                                                                 |
| YP_615144        | Sala_0085        | short-chain dehydrogenase/reductase SDR                           | 64.14%                   | 10                             |                                                                                                                                                                                                                                                                                                                                                                                                                                                                                                                                                                                                                                                                                                                                                                                                                                                                                                                                                                                                                                                                                                                                                                                                                                                                                                                                                                                                                                                                                                                                                                                                                                                                                                                                                                                                                                                                                                                                                                                                                                                                                                                                                                                                                                                                                                                                                                                                                                                                                                                                                                                                                                                                                                                                                                                                                                                                                                                                                                                                                                                 |
| YP_615146        | Sala_0087        | hypothetical protein                                              | 28.52%                   | 5                              |                                                                                                                                                                                                                                                                                                                                                                                                                                                                                                                                                                                                                                                                                                                                                                                                                                                                                                                                                                                                                                                                                                                                                                                                                                                                                                                                                                                                                                                                                                                                                                                                                                                                                                                                                                                                                                                                                                                                                                                                                                                                                                                                                                                                                                                                                                                                                                                                                                                                                                                                                                                                                                                                                                                                                                                                                                                                                                                                                                                                                                                 |
| YP_615149        | Sala_0090        | transcriptional regulator, MarR family                            | 45.03%                   | 7                              |                                                                                                                                                                                                                                                                                                                                                                                                                                                                                                                                                                                                                                                                                                                                                                                                                                                                                                                                                                                                                                                                                                                                                                                                                                                                                                                                                                                                                                                                                                                                                                                                                                                                                                                                                                                                                                                                                                                                                                                                                                                                                                                                                                                                                                                                                                                                                                                                                                                                                                                                                                                                                                                                                                                                                                                                                                                                                                                                                                                                                                                 |
| YP_615151        | Sala_0092        | hypothetical protein                                              | 18.44%                   | 2                              |                                                                                                                                                                                                                                                                                                                                                                                                                                                                                                                                                                                                                                                                                                                                                                                                                                                                                                                                                                                                                                                                                                                                                                                                                                                                                                                                                                                                                                                                                                                                                                                                                                                                                                                                                                                                                                                                                                                                                                                                                                                                                                                                                                                                                                                                                                                                                                                                                                                                                                                                                                                                                                                                                                                                                                                                                                                                                                                                                                                                                                                 |
| YP_615152        | Sala_0093        | NmrA-like protein                                                 | 9.96%                    | 2                              |                                                                                                                                                                                                                                                                                                                                                                                                                                                                                                                                                                                                                                                                                                                                                                                                                                                                                                                                                                                                                                                                                                                                                                                                                                                                                                                                                                                                                                                                                                                                                                                                                                                                                                                                                                                                                                                                                                                                                                                                                                                                                                                                                                                                                                                                                                                                                                                                                                                                                                                                                                                                                                                                                                                                                                                                                                                                                                                                                                                                                                                 |
| YP_615157        | Sala_0099        | hypothetical protein                                              | 25.79%                   | 3                              |                                                                                                                                                                                                                                                                                                                                                                                                                                                                                                                                                                                                                                                                                                                                                                                                                                                                                                                                                                                                                                                                                                                                                                                                                                                                                                                                                                                                                                                                                                                                                                                                                                                                                                                                                                                                                                                                                                                                                                                                                                                                                                                                                                                                                                                                                                                                                                                                                                                                                                                                                                                                                                                                                                                                                                                                                                                                                                                                                                                                                                                 |
| YP_615158        | Sala_0100        | hypothetical protein                                              | 61.33%                   | 7                              |                                                                                                                                                                                                                                                                                                                                                                                                                                                                                                                                                                                                                                                                                                                                                                                                                                                                                                                                                                                                                                                                                                                                                                                                                                                                                                                                                                                                                                                                                                                                                                                                                                                                                                                                                                                                                                                                                                                                                                                                                                                                                                                                                                                                                                                                                                                                                                                                                                                                                                                                                                                                                                                                                                                                                                                                                                                                                                                                                                                                                                                 |
| YP_615162        | Sala_0104        | hypothetical protein                                              | 31.25%                   | 3                              |                                                                                                                                                                                                                                                                                                                                                                                                                                                                                                                                                                                                                                                                                                                                                                                                                                                                                                                                                                                                                                                                                                                                                                                                                                                                                                                                                                                                                                                                                                                                                                                                                                                                                                                                                                                                                                                                                                                                                                                                                                                                                                                                                                                                                                                                                                                                                                                                                                                                                                                                                                                                                                                                                                                                                                                                                                                                                                                                                                                                                                                 |
| YP_615164        | Sala_0106        | protein of unknown function DUF336                                | 33.57%                   | 3                              |                                                                                                                                                                                                                                                                                                                                                                                                                                                                                                                                                                                                                                                                                                                                                                                                                                                                                                                                                                                                                                                                                                                                                                                                                                                                                                                                                                                                                                                                                                                                                                                                                                                                                                                                                                                                                                                                                                                                                                                                                                                                                                                                                                                                                                                                                                                                                                                                                                                                                                                                                                                                                                                                                                                                                                                                                                                                                                                                                                                                                                                 |
| YP_615166        | Sala_0108        | oxidoreductase, molybdopterin binding                             | 19.90%                   | 2                              |                                                                                                                                                                                                                                                                                                                                                                                                                                                                                                                                                                                                                                                                                                                                                                                                                                                                                                                                                                                                                                                                                                                                                                                                                                                                                                                                                                                                                                                                                                                                                                                                                                                                                                                                                                                                                                                                                                                                                                                                                                                                                                                                                                                                                                                                                                                                                                                                                                                                                                                                                                                                                                                                                                                                                                                                                                                                                                                                                                                                                                                 |
| YP_615168        | Sala_0110        | Acetyl-CoA C-acyltransferase                                      | 18.29%                   | 5                              |                                                                                                                                                                                                                                                                                                                                                                                                                                                                                                                                                                                                                                                                                                                                                                                                                                                                                                                                                                                                                                                                                                                                                                                                                                                                                                                                                                                                                                                                                                                                                                                                                                                                                                                                                                                                                                                                                                                                                                                                                                                                                                                                                                                                                                                                                                                                                                                                                                                                                                                                                                                                                                                                                                                                                                                                                                                                                                                                                                                                                                                 |
| YP_615178        | Sala_0121        | pyridine nucleotide-disulphide oxidoreductase dimerisation region | 10.97%                   | 3                              |                                                                                                                                                                                                                                                                                                                                                                                                                                                                                                                                                                                                                                                                                                                                                                                                                                                                                                                                                                                                                                                                                                                                                                                                                                                                                                                                                                                                                                                                                                                                                                                                                                                                                                                                                                                                                                                                                                                                                                                                                                                                                                                                                                                                                                                                                                                                                                                                                                                                                                                                                                                                                                                                                                                                                                                                                                                                                                                                                                                                                                                 |
| YP_615181        | Sala_0124        | helix-turn-helix, Fis-type                                        | 12.90%                   | 2                              |                                                                                                                                                                                                                                                                                                                                                                                                                                                                                                                                                                                                                                                                                                                                                                                                                                                                                                                                                                                                                                                                                                                                                                                                                                                                                                                                                                                                                                                                                                                                                                                                                                                                                                                                                                                                                                                                                                                                                                                                                                                                                                                                                                                                                                                                                                                                                                                                                                                                                                                                                                                                                                                                                                                                                                                                                                                                                                                                                                                                                                                 |
| YP_615182        | Sala_0125        | Protein-methionine-S-oxide reductase                              | 33.33%                   | 3                              |                                                                                                                                                                                                                                                                                                                                                                                                                                                                                                                                                                                                                                                                                                                                                                                                                                                                                                                                                                                                                                                                                                                                                                                                                                                                                                                                                                                                                                                                                                                                                                                                                                                                                                                                                                                                                                                                                                                                                                                                                                                                                                                                                                                                                                                                                                                                                                                                                                                                                                                                                                                                                                                                                                                                                                                                                                                                                                                                                                                                                                                 |
| YP_615183        | Sala_0126        | peptide methionine sulfoxide reductase                            | 45.03%                   | 6                              |                                                                                                                                                                                                                                                                                                                                                                                                                                                                                                                                                                                                                                                                                                                                                                                                                                                                                                                                                                                                                                                                                                                                                                                                                                                                                                                                                                                                                                                                                                                                                                                                                                                                                                                                                                                                                                                                                                                                                                                                                                                                                                                                                                                                                                                                                                                                                                                                                                                                                                                                                                                                                                                                                                                                                                                                                                                                                                                                                                                                                                                 |
| YP_615187        | Sala_0130        | Endoribonuclease L-PSP                                            | 19.23%                   | 2                              |                                                                                                                                                                                                                                                                                                                                                                                                                                                                                                                                                                                                                                                                                                                                                                                                                                                                                                                                                                                                                                                                                                                                                                                                                                                                                                                                                                                                                                                                                                                                                                                                                                                                                                                                                                                                                                                                                                                                                                                                                                                                                                                                                                                                                                                                                                                                                                                                                                                                                                                                                                                                                                                                                                                                                                                                                                                                                                                                                                                                                                                 |
| YP_615202        | Sala_0145        | thioredoxin reductase                                             | 72.90%                   | 11                             |                                                                                                                                                                                                                                                                                                                                                                                                                                                                                                                                                                                                                                                                                                                                                                                                                                                                                                                                                                                                                                                                                                                                                                                                                                                                                                                                                                                                                                                                                                                                                                                                                                                                                                                                                                                                                                                                                                                                                                                                                                                                                                                                                                                                                                                                                                                                                                                                                                                                                                                                                                                                                                                                                                                                                                                                                                                                                                                                                                                                                                                 |
| YP_615204        | Sala_0147        | Rhodanese-like protein                                            | 23.14%                   | 3                              |                                                                                                                                                                                                                                                                                                                                                                                                                                                                                                                                                                                                                                                                                                                                                                                                                                                                                                                                                                                                                                                                                                                                                                                                                                                                                                                                                                                                                                                                                                                                                                                                                                                                                                                                                                                                                                                                                                                                                                                                                                                                                                                                                                                                                                                                                                                                                                                                                                                                                                                                                                                                                                                                                                                                                                                                                                                                                                                                                                                                                                                 |
| YP_615205        | Sala_0148        | nitrogen regulatory protein P-II                                  | 46.43%                   | 4                              |                                                                                                                                                                                                                                                                                                                                                                                                                                                                                                                                                                                                                                                                                                                                                                                                                                                                                                                                                                                                                                                                                                                                                                                                                                                                                                                                                                                                                                                                                                                                                                                                                                                                                                                                                                                                                                                                                                                                                                                                                                                                                                                                                                                                                                                                                                                                                                                                                                                                                                                                                                                                                                                                                                                                                                                                                                                                                                                                                                                                                                                 |

| Accession | Locus tag | Description                                         | Sequence coverage | No. peptides identified | List of peptides identified                                                                                                                                                                                                                                                                                                                                                                                                                                                                                                                                                                                                                                                                                                                                                                                                                                                                                                                                                                                                                                                                                                                                                                                                                                                                                                                                                                                                                                                                                                                                                                                                                                                                                                                                                                                                                                                                                                                                                                                                                                                                                                                                                                                                                                                                                                                                                                                                                                                                                                                                                                                                                                                                                                                                                                                                                                                                                                                                                                                                                                                                                                                                                                                                                                                                                                                                                                                      |
|-----------|-----------|-----------------------------------------------------|-------------------|-------------------------|------------------------------------------------------------------------------------------------------------------------------------------------------------------------------------------------------------------------------------------------------------------------------------------------------------------------------------------------------------------------------------------------------------------------------------------------------------------------------------------------------------------------------------------------------------------------------------------------------------------------------------------------------------------------------------------------------------------------------------------------------------------------------------------------------------------------------------------------------------------------------------------------------------------------------------------------------------------------------------------------------------------------------------------------------------------------------------------------------------------------------------------------------------------------------------------------------------------------------------------------------------------------------------------------------------------------------------------------------------------------------------------------------------------------------------------------------------------------------------------------------------------------------------------------------------------------------------------------------------------------------------------------------------------------------------------------------------------------------------------------------------------------------------------------------------------------------------------------------------------------------------------------------------------------------------------------------------------------------------------------------------------------------------------------------------------------------------------------------------------------------------------------------------------------------------------------------------------------------------------------------------------------------------------------------------------------------------------------------------------------------------------------------------------------------------------------------------------------------------------------------------------------------------------------------------------------------------------------------------------------------------------------------------------------------------------------------------------------------------------------------------------------------------------------------------------------------------------------------------------------------------------------------------------------------------------------------------------------------------------------------------------------------------------------------------------------------------------------------------------------------------------------------------------------------------------------------------------------------------------------------------------------------------------------------------------------------------------------------------------------------------------------------------------|
| YP_615206 | Sala_0149 | glutamine synthetase, type I                        | 62.55%            | 27                      | R.LVPGFEAPVLLAYSSR.N<br>K.SGFEIDDELPTNTR.G.S<br>K.GGYFFVAPVDSAVDIR.A<br>K.ALNAFTNPTTNSYK.R<br>R.IKDNDEIWWDLR.F<br>K.YVVHQVAHAYK.T<br>K.GDVFSKQIEAVVELK.W<br>R.FEQTSPVFEFDMYYSA.<br>R.EALDSLMDHDFLLK.G<br>R.AKGGFFVAPVDSAVDIR.A<br>K.RAEAYLGSSTGIGDVTYVGPAAEFFMDDVR.F<br>K.HHHEVAAQHGLGLTGLTQTADR.M<br>K.ALNAFTNPTTNSYK.R.L<br>K.RLVPGEAPVLLAYSSR.N<br>R.AEAYLGSSTGIGDVTYVGPAAEFFMDDVR.F<br>R.FETGYNK.S<br>K.DQIEAYVELK.W<br>R.FPDAMNPYLCYSALLMAGLDGIQNK.I<br>R.FPDAMNPYLCYSALLMAGLDGIQNK.I<br>R.EALDSLMDHDFLLK.G<br>K.RAEAYLGSSTGIGDVTYVGPAAEFFMDDVR.F<br>K.GKPLFAGNGYAGLSMDCLYFVGGVIK.H<br>R.IPVGAAGAK.A<br>R.FPDAMNPYLCYSALLMAGLDGIQNK.I<br>R.AEMVSTMLEMGLPKDK.H<br>K.PIKDDNGSGMHTHISWEK.G<br>K.GKPLFAGNGYAGLSMDCLYFVGGVIK.H<br>K.LHEVFNAPTEEAASVVLGTAADVDAVAAR.E<br>K.IQGLIQSAIDEGAKLETGGTGLPSNVNR.G<br>R.AGMVAVNSWGPAGPFGYK.A<br>K.VVYEPVIGVMITPWNWPLNQIALK.V<br>K.DFSFTEHGANK.V<br>K.LETGTGLPSNVNR.G<br>K.IQGLIQSAIDEGAK.L<br>K.EREAAYGVK.A<br>R.GYYVKTVESGVTPEMR.I<br>R.EGGLFGLKDFMEVK.A<br>R.VHQLGGK.S<br>K.QHYIGGWVDSK.G<br>K.AMPDGTQVGDPMSEGAHIGPVVVK.A<br>R.EEIFGPVAVVHAYDTLDQAVEIANDTEYGLSAVSGDPK.A<br>R.EAEAVGVK.A<br>K.AQFDKIQGLIQSAIDEGAK.L<br>R.LELLNRIVEEYK.K<br>K.SMAAEMGAPVSFAGTAQVAGIGGFLGTIAALK.D<br>K.SMAAEMGAPVSFAGTAQVAGIGGFLGTIAALK.D<br>K.AQFDKIQGLIQSAIDEGAKLETGGTGLPSNVNR.G<br>R.ALIVNAGNSNAFTGYR.G<br>R.SPLAPAAPDLPEIAGVTR.R<br>R.QVALDLAHQVVR.D<br>R.EAAGFTNATVDSSTVLLFATGQAGHAPLAAR.D<br>R.DDPGADALYAAR.Q<br>K.GAAASAVGSR.T<br>K.DGLAVDGYDEAPVAHLK.G<br>R.IGADLGLGGR.A<br>K.TAAGEDANWGR.V<br>K.FIEVQVTR.A<br>R.VALAIAANSPLVK.T<br>R.QVALDLAHQVVRDGEASK.F<br>R.TVIVAGIAK.G<br>R.AGVAAALTA.P<br>R.AGVAAALTA.P<br>R.AGVAAALTA.P<br>K.MIGPALEISDELAK.V<br>K.NGEIADTK.V<br>K.SALKGWLEGAL.<br>R.GIPTMILFKNKEIADTK.V<br>K.NGEIADTKVGAAPK.S<br>K.LNIDDDHPDAPSK.Y<br>R.GIPTMILFK.N<br>R.WLAVQAPALDEPAR.G<br>R.AIEDEAGALQR.R<br>R.IATALLTAAPR.L<br>R.AAAAAAQR.L<br>K.LPVYAIGADER.H<br>R.TVPEASWHAASVGLDR.L<br>R.HGALADAYK.A<br>R.FAVQPHDDLNLALLVSPILGWTDQDLYDR.T<br>R.EQGLADFDLITLAGSLR.V<br>R.EARDPIDELLNQLAFEAR.K<br>R.AGQDFEAVDLISNYR.S<br>R.VLGLLDAPDEEQALR.A<br>R.LQALHVPVAGVDR.F<br>R.LGPDAAIAGLSR.C<br>R.LGHNDWEDGGAAWGR.R<br>R.FLETLISGPIDGR.R<br>R.FAEYALAK.R<br>R.ALFAVIVDSPPGAIK.V<br>K.GLQAPVILADATDDAAFGRPFTVDVAWEK.L<br>K.DGRPVAPGDVMLVR.R<br>K.AVAASGAIAWTK.T<br>K.ALGATEEADGDDNGNATAPARDPASMRL.L<br>K.AAADEEHWR.L<br>R.WGIAVDSAGQPLAR.T<br>R.LAALAGDLPQALDGVPLTDLAAR.I<br>R.AGANAFAEAEALALRDDPALDAIAR.A<br>R.YADVILGLTEGVLVPSNR.A<br>R.QGLEWLTGEAAWTPAGR.M<br>R.AFADALAAGLIDR.Y<br>K.AAFDKLDNQLGLLIAR.R<br>R.YTPAGEPPVGAFAAQLAGGLAR.V<br>R.SAVQAAVFR.A<br>R.FVWAAAGITTAAPAIAR.L<br>K.LDNQLGLLIAR.R<br>R.WPAATQPDVWLPAGIR.R<br>K.SAAEAVDHAADALAGLAR.Y<br>R.IAPFVYTGILVSR.R<br>K.ALPLITGDPILLVNSDNIWTDGPQDSIR.H<br>R.RLLDAPDGPFTNINLWDR.A<br>R.LLDGAPDGPFTNINLWDR.A<br>R.GLLIEDFGVDR.L<br>R.AAWEAALTPVESDGLPR.V<br>R.DIENAYWALAAQR.N<br>R.IPLAGDASFR.R<br>R.DVSPAEEAAMLAR.Y<br>R.DLAHPALVPR.Q<br>R.LRETVAAPDR.E<br>R.ILGVFR.L<br>K.GQQAGTDTGGIGLALR.Q<br>R.QIDNVLDLAQGEAGTALIER.A<br>R.LSAAVAQFQDQGLAFANLPPR.R<br>R.LASLVEASPOLPVIVR.A<br>R.NEALAEADKAK.T<br>R.LVAGLLDNAVR.F<br>R.AAFAGQAEK.L<br>K.GVSEITTTGVR.L<br>R.SEQYQNDVYVLPK.H<br>K.KGELFPAINNDVSTK.S<br>K.WATVACFGDVGK.G<br>K.GESLADYDYYGR.I<br>K.WTEVKQVDLVEFPDGK.Q<br>K.AFIAAKPGYLT.T<br>R.IFDWESDNDGR.T<br>R.TANLILDDGGDATMFLWGA.L<br>R.DYVADIGLADFRK.E<br>K.EINIAETEMGLMALR.A<br>R.DYVADIGLADFRK.K<br>K.VAALHLEK.L |
| YP_615211 | Sala_0154 | aldehyde dehydrogenase                              | 61.64%            | 20                      | K.GKPLFAGNGYAGLSMDCLYFVGGVIK.H<br>K.LHEVFNAPTEEAASVVLGTAADVDAVAAR.E<br>K.IQGLIQSAIDEGAKLETGGTGLPSNVNR.G<br>R.AGMVAVNSWGPAGPFGYK.A<br>K.VVYEPVIGVMITPWNWPLNQIALK.V<br>K.DFSFTEHGANK.V<br>K.LETGTGLPSNVNR.G<br>K.IQGLIQSAIDEGAK.L<br>K.EREAAYGVK.A<br>R.GYYVKTVESGVTPEMR.I<br>R.EGGLFGLKDFMEVK.A<br>R.VHQLGGK.S<br>K.QHYIGGWVDSK.G<br>K.AMPDGTQVGDPMSEGAHIGPVVVK.A<br>R.EEIFGPVAVVHAYDTLDQAVEIANDTEYGLSAVSGDPK.A<br>R.EAEAVGVK.A<br>K.AQFDKIQGLIQSAIDEGAK.L<br>R.LELLNRIVEEYK.K<br>K.SMAAEMGAPVSFAGTAQVAGIGGFLGTIAALK.D<br>K.SMAAEMGAPVSFAGTAQVAGIGGFLGTIAALK.D<br>K.AQFDKIQGLIQSAIDEGAKLETGGTGLPSNVNR.G<br>R.ALIVNAGNSNAFTGYR.G<br>R.SPLAPAAPDLPEIAGVTR.R<br>R.QVALDLAHQVVR.D<br>R.EAAGFTNATVDSSTVLLFATGQAGHAPLAAR.D<br>R.DDPGADALYAAR.Q<br>K.GAAASAVGSR.T<br>K.DGLAVDGYDEAPVAHLK.G<br>R.IGADLGLGGR.A<br>K.TAAGEDANWGR.V<br>K.FIEVQVTR.A<br>R.VALAIAANSPLVK.T<br>R.QVALDLAHQVVRDGEASK.F<br>R.TVIVAGIAK.G<br>R.AGVAAALTA.P<br>R.AGVAAALTA.P<br>R.AGVAAALTA.P<br>K.MIGPALEISDELAK.V<br>K.NGEIADTK.V<br>K.SALKGWLEGAL.<br>R.GIPTMILFKNKEIADTK.V<br>K.NGEIADTKVGAAPK.S<br>K.LNIDDDHPDAPSK.Y<br>R.GIPTMILFK.N<br>R.WLAVQAPALDEPAR.G<br>R.AIEDEAGALQR.R<br>R.IATALLTAAPR.L<br>R.AAAAAAQR.L<br>K.LPVYAIGADER.H<br>R.TVPEASWHAASVGLDR.L<br>R.HGALADAYK.A<br>R.FAVQPHDDLNLALLVSPILGWTDQDLYDR.T<br>R.EQGLADFDLITLAGSLR.V<br>R.EARDPIDELLNQLAFEAR.K<br>R.AGQDFEAVDLISNYR.S<br>R.VLGLLDAPDEEQALR.A<br>R.LQALHVPVAGVDR.F<br>R.LGPDAAIAGLSR.C<br>R.LGHNDWEDGGAAWGR.R<br>R.FLETLISGPIDGR.R<br>R.FAEYALAK.R<br>R.ALFAVIVDSPPGAIK.V<br>K.GLQAPVILADATDDAAFGRPFTVDVAWEK.L<br>K.DGRPVAPGDVMLVR.R<br>K.AVAASGAIAWTK.T<br>K.ALGATEEADGDDNGNATAPARDPASMRL.L<br>K.AAADEEHWR.L<br>R.WGIAVDSAGQPLAR.T<br>R.LAALAGDLPQALDGVPLTDLAAR.I<br>R.AGANAFAEAEALALRDDPALDAIAR.A<br>R.YADVILGLTEGVLVPSNR.A<br>R.QGLEWLTGEAAWTPAGR.M<br>R.AFADALAAGLIDR.Y<br>K.AAFDKLDNQLGLLIAR.R<br>R.YTPAGEPPVGAFAAQLAGGLAR.V<br>R.SAVQAAVFR.A<br>R.FVWAAAGITTAAPAIAR.L<br>K.LDNQLGLLIAR.R<br>R.WPAATQPDVWLPAGIR.R<br>K.SAAEAVDHAADALAGLAR.Y<br>R.IAPFVYTGILVSR.R<br>K.ALPLITGDPILLVNSDNIWTDGPQDSIR.H<br>R.RLLDAPDGPFTNINLWDR.A<br>R.LLDGAPDGPFTNINLWDR.A<br>R.GLLIEDFGVDR.L<br>R.AAWEAALTPVESDGLPR.V<br>R.DIENAYWALAAQR.N<br>R.IPLAGDASFR.R<br>R.DVSPAEEAAMLAR.Y<br>R.DLAHPALVPR.Q<br>R.LRETVAAPDR.E<br>R.ILGVFR.L<br>K.GQQAGTDTGGIGLALR.Q<br>R.QIDNVLDLAQGEAGTALIER.A<br>R.LSAAVAQFQDQGLAFANLPPR.R<br>R.LASLVEASPOLPVIVR.A<br>R.NEALAEADKAK.T<br>R.LVAGLLDNAVR.F<br>R.AAFAGQAEK.L<br>K.GVSEITTTGVR.L<br>R.SEQYQNDVYVLPK.H<br>K.KGELFPAINNDVSTK.S<br>K.WATVACFGDVGK.G<br>K.GESLADYDYYGR.I<br>K.WTEVKQVDLVEFPDGK.Q<br>K.AFIAAKPGYLT.T<br>R.IFDWESDNDGR.T<br>R.TANLILDDGGDATMFLWGA.L<br>R.DYVADIGLADFRK.E<br>K.EINIAETEMGLMALR.A<br>R.DYVADIGLADFRK.K<br>K.VAALHLEK.L                                                                                                                                                                                                                                                                                                                                                                                                                                                                                                                                                                                                                                                                                                 |
| YP_615212 | Sala_0155 | arginine biosynthesis bifunctional protein ArgJ     | 52.70%            | 15                      | R.SPLAPAAPDLPEIAGVTR.R<br>R.QVALDLAHQVVR.D<br>R.EAAGFTNATVDSSTVLLFATGQAGHAPLAAR.D<br>R.DDPGADALYAAR.Q<br>K.GAAASAVGSR.T<br>K.DGLAVDGYDEAPVAHLK.G<br>R.IGADLGLGGR.A<br>K.TAAGEDANWGR.V<br>K.FIEVQVTR.A<br>R.VALAIAANSPLVK.T<br>R.QVALDLAHQVVRDGEASK.F<br>R.TVIVAGIAK.G<br>R.AGVAAALTA.P<br>R.AGVAAALTA.P<br>R.AGVAAALTA.P<br>K.MIGPALEISDELAK.V<br>K.NGEIADTK.V<br>K.SALKGWLEGAL.<br>R.GIPTMILFKNKEIADTK.V<br>K.NGEIADTKVGAAPK.S<br>K.LNIDDDHPDAPSK.Y<br>R.GIPTMILFK.N<br>R.WLAVQAPALDEPAR.G<br>R.AIEDEAGALQR.R<br>R.IATALLTAAPR.L<br>R.AAAAAAQR.L<br>K.LPVYAIGADER.H<br>R.TVPEASWHAASVGLDR.L<br>R.HGALADAYK.A<br>R.FAVQPHDDLNLALLVSPILGWTDQDLYDR.T<br>R.EQGLADFDLITLAGSLR.V<br>R.EARDPIDELLNQLAFEAR.K<br>R.AGQDFEAVDLISNYR.S<br>R.VLGLLDAPDEEQALR.A<br>R.LQALHVPVAGVDR.F<br>R.LGPDAAIAGLSR.C<br>R.LGHNDWEDGGAAWGR.R<br>R.FLETLISGPIDGR.R<br>R.FAEYALAK.R<br>R.ALFAVIVDSPPGAIK.V<br>K.GLQAPVILADATDDAAFGRPFTVDVAWEK.L<br>K.DGRPVAPGDVMLVR.R<br>K.AVAASGAIAWTK.T<br>K.ALGATEEADGDDNGNATAPARDPASMRL.L<br>K.AAADEEHWR.L<br>R.WGIAVDSAGQPLAR.T<br>R.LAALAGDLPQALDGVPLTDLAAR.I<br>R.AGANAFAEAEALALRDDPALDAIAR.A<br>R.YADVILGLTEGVLVPSNR.A<br>R.QGLEWLTGEAAWTPAGR.M<br>R.AFADALAAGLIDR.Y<br>K.AAFDKLDNQLGLLIAR.R<br>R.YTPAGEPPVGAFAAQLAGGLAR.V<br>R.SAVQAAVFR.A<br>R.FVWAAAGITTAAPAIAR.L<br>K.LDNQLGLLIAR.R<br>R.WPAATQPDVWLPAGIR.R<br>K.SAAEAVDHAADALAGLAR.Y<br>R.IAPFVYTGILVSR.R<br>K.ALPLITGDPILLVNSDNIWTDGPQDSIR.H<br>R.RLLDAPDGPFTNINLWDR.A<br>R.LLDGAPDGPFTNINLWDR.A<br>R.GLLIEDFGVDR.L<br>R.AAWEAALTPVESDGLPR.V<br>R.DIENAYWALAAQR.N<br>R.IPLAGDASFR.R<br>R.DVSPAEEAAMLAR.Y<br>R.DLAHPALVPR.Q<br>R.LRETVAAPDR.E<br>R.ILGVFR.L<br>K.GQQAGTDTGGIGLALR.Q<br>R.QIDNVLDLAQGEAGTALIER.A<br>R.LSAAVAQFQDQGLAFANLPPR.R<br>R.LASLVEASPOLPVIVR.A<br>R.NEALAEADKAK.T<br>R.LVAGLLDNAVR.F<br>R.AAFAGQAEK.L<br>K.GVSEITTTGVR.L<br>R.SEQYQNDVYVLPK.H<br>K.KGELFPAINNDVSTK.S<br>K.WATVACFGDVGK.G<br>K.GESLADYDYYGR.I<br>K.WTEVKQVDLVEFPDGK.Q<br>K.AFIAAKPGYLT.T<br>R.IFDWESDNDGR.T<br>R.TANLILDDGGDATMFLWGA.L<br>R.DYVADIGLADFRK.E<br>K.EINIAETEMGLMALR.A<br>R.DYVADIGLADFRK.K<br>K.VAALHLEK.L                                                                                                                                                                                                                                                                                                                                                                                                                                                                                                                                                                                                                                                                                                                                                                                                                                                                                                                                                                                                                                                                                                                                                                                                                                                                                                                                   |
| YP_615213 | Sala_0156 | thioredoxin                                         | 66.04%            | 7                       | R.AGVAAALTA.P<br>R.AGVAAALTA.P<br>R.AGVAAALTA.P<br>K.MIGPALEISDELAK.V<br>K.NGEIADTK.V<br>K.SALKGWLEGAL.<br>R.GIPTMILFKNKEIADTK.V<br>K.NGEIADTKVGAAPK.S<br>K.LNIDDDHPDAPSK.Y<br>R.GIPTMILFK.N<br>R.WLAVQAPALDEPAR.G<br>R.AIEDEAGALQR.R<br>R.IATALLTAAPR.L<br>R.AAAAAAQR.L<br>K.LPVYAIGADER.H<br>R.TVPEASWHAASVGLDR.L<br>R.HGALADAYK.A<br>R.FAVQPHDDLNLALLVSPILGWTDQDLYDR.T<br>R.EQGLADFDLITLAGSLR.V<br>R.EARDPIDELLNQLAFEAR.K<br>R.AGQDFEAVDLISNYR.S<br>R.VLGLLDAPDEEQALR.A<br>R.LQALHVPVAGVDR.F<br>R.LGPDAAIAGLSR.C<br>R.LGHNDWEDGGAAWGR.R<br>R.FLETLISGPIDGR.R<br>R.FAEYALAK.R<br>R.ALFAVIVDSPPGAIK.V<br>K.GLQAPVILADATDDAAFGRPFTVDVAWEK.L<br>K.DGRPVAPGDVMLVR.R<br>K.AVAASGAIAWTK.T<br>K.ALGATEEADGDDNGNATAPARDPASMRL.L<br>K.AAADEEHWR.L<br>R.WGIAVDSAGQPLAR.T<br>R.LAALAGDLPQALDGVPLTDLAAR.I<br>R.AGANAFAEAEALALRDDPALDAIAR.A<br>R.YADVILGLTEGVLVPSNR.A<br>R.QGLEWLTGEAAWTPAGR.M<br>R.AFADALAAGLIDR.Y<br>K.AAFDKLDNQLGLLIAR.R<br>R.YTPAGEPPVGAFAAQLAGGLAR.V<br>R.SAVQAAVFR.A<br>R.FVWAAAGITTAAPAIAR.L<br>K.LDNQLGLLIAR.R<br>R.WPAATQPDVWLPAGIR.R<br>K.SAAEAVDHAADALAGLAR.Y<br>R.IAPFVYTGILVSR.R<br>K.ALPLITGDPILLVNSDNIWTDGPQDSIR.H<br>R.RLLDAPDGPFTNINLWDR.A<br>R.LLDGAPDGPFTNINLWDR.A<br>R.GLLIEDFGVDR.L<br>R.AAWEAALTPVESDGLPR.V<br>R.DIENAYWALAAQR.N<br>R.IPLAGDASFR.R<br>R.DVSPAEEAAMLAR.Y<br>R.DLAHPALVPR.Q<br>R.LRETVAAPDR.E<br>R.ILGVFR.L<br>K.GQQAGTDTGGIGLALR.Q<br>R.QIDNVLDLAQGEAGTALIER.A<br>R.LSAAVAQFQDQGLAFANLPPR.R<br>R.LASLVEASPOLPVIVR.A<br>R.NEALAEADKAK.T<br>R.LVAGLLDNAVR.F<br>R.AAFAGQAEK.L<br>K.GVSEITTTGVR.L<br>R.SEQYQNDVYVLPK.H<br>K.KGELFPAINNDVSTK.S<br>K.WATVACFGDVGK.G<br>K.GESLADYDYYGR.I<br>K.WTEVKQVDLVEFPDGK.Q<br>K.AFIAAKPGYLT.T<br>R.IFDWESDNDGR.T<br>R.TANLILDDGGDATMFLWGA.L<br>R.DYVADIGLADFRK.E<br>K.EINIAETEMGLMALR.A<br>R.DYVADIGLADFRK.K<br>K.VAALHLEK.L                                                                                                                                                                                                                                                                                                                                                                                                                                                                                                                                                                                                                                                                                                                                                                                                                                                                                                                                                                                                                                                                                                                                                                                                                                                                                                                                                                                                                                                                                                                                                                                                            |
| YP_615214 | Sala_0157 | UvrD/REP helicase                                   | 30.70%            | 23                      | R.WLAVQAPALDEPAR.G<br>R.AIEDEAGALQR.R<br>R.IATALLTAAPR.L<br>R.AAAAAAQR.L<br>K.LPVYAIGADER.H<br>R.TVPEASWHAASVGLDR.L<br>R.HGALADAYK.A<br>R.FAVQPHDDLNLALLVSPILGWTDQDLYDR.T<br>R.EQGLADFDLITLAGSLR.V<br>R.EARDPIDELLNQLAFEAR.K<br>R.AGQDFEAVDLISNYR.S<br>R.VLGLLDAPDEEQALR.A<br>R.LQALHVPVAGVDR.F<br>R.LGPDAAIAGLSR.C<br>R.LGHNDWEDGGAAWGR.R<br>R.FLETLISGPIDGR.R<br>R.FAEYALAK.R<br>R.ALFAVIVDSPPGAIK.V<br>K.GLQAPVILADATDDAAFGRPFTVDVAWEK.L<br>K.DGRPVAPGDVMLVR.R<br>K.AVAASGAIAWTK.T<br>K.ALGATEEADGDDNGNATAPARDPASMRL.L<br>K.AAADEEHWR.L<br>R.WGIAVDSAGQPLAR.T<br>R.LAALAGDLPQALDGVPLTDLAAR.I<br>R.AGANAFAEAEALALRDDPALDAIAR.A<br>R.YADVILGLTEGVLVPSNR.A<br>R.QGLEWLTGEAAWTPAGR.M<br>R.AFADALAAGLIDR.Y<br>K.AAFDKLDNQLGLLIAR.R<br>R.YTPAGEPPVGAFAAQLAGGLAR.V<br>R.SAVQAAVFR.A<br>R.FVWAAAGITTAAPAIAR.L<br>K.LDNQLGLLIAR.R<br>R.WPAATQPDVWLPAGIR.R<br>K.SAAEAVDHAADALAGLAR.Y<br>R.IAPFVYTGILVSR.R<br>K.ALPLITGDPILLVNSDNIWTDGPQDSIR.H<br>R.RLLDAPDGPFTNINLWDR.A<br>R.LLDGAPDGPFTNINLWDR.A<br>R.GLLIEDFGVDR.L<br>R.AAWEAALTPVESDGLPR.V<br>R.DIENAYWALAAQR.N<br>R.IPLAGDASFR.R<br>R.DVSPAEEAAMLAR.Y<br>R.DLAHPALVPR.Q<br>R.LRETVAAPDR.E<br>R.ILGVFR.L<br>K.GQQAGTDTGGIGLALR.Q<br>R.QIDNVLDLAQGEAGTALIER.A<br>R.LSAAVAQFQDQGLAFANLPPR.R<br>R.LASLVEASPOLPVIVR.A<br>R.NEALAEADKAK.T<br>R.LVAGLLDNAVR.F<br>R.AAFAGQAEK.L<br>K.GVSEITTTGVR.L<br>R.SEQYQNDVYVLPK.H<br>K.KGELFPAINNDVSTK.S<br>K.WATVACFGDVGK.G<br>K.GESLADYDYYGR.I<br>K.WTEVKQVDLVEFPDGK.Q<br>K.AFIAAKPGYLT.T<br>R.IFDWESDNDGR.T<br>R.TANLILDDGGDATMFLWGA.L<br>R.DYVADIGLADFRK.E<br>K.EINIAETEMGLMALR.A<br>R.DYVADIGLADFRK.K<br>K.VAALHLEK.L                                                                                                                                                                                                                                                                                                                                                                                                                                                                                                                                                                                                                                                                                                                                                                                                                                                                                                                                                                                                                                                                                                                                                                                                                                                                                                                                                                                                                                                                                                                                                                                                                                                                                                                                                                                                            |
| YP_615215 | Sala_0158 | helicase                                            | 21.80%            | 13                      | R.WLAVQAPALDEPAR.G<br>R.AIEDEAGALQR.R<br>R.IATALLTAAPR.L<br>R.AAAAAAQR.L<br>K.LPVYAIGADER.H<br>R.TVPEASWHAASVGLDR.L<br>R.HGALADAYK.A<br>R.FAVQPHDDLNLALLVSPILGWTDQDLYDR.T<br>R.EQGLADFDLITLAGSLR.V<br>R.EARDPIDELLNQLAFEAR.K<br>R.AGQDFEAVDLISNYR.S<br>R.VLGLLDAPDEEQALR.A<br>R.LQALHVPVAGVDR.F<br>R.LGPDAAIAGLSR.C<br>R.LGHNDWEDGGAAWGR.R<br>R.FLETLISGPIDGR.R<br>R.FAEYALAK.R<br>R.ALFAVIVDSPPGAIK.V<br>K.GLQAPVILADATDDAAFGRPFTVDVAWEK.L<br>K.DGRPVAPGDVMLVR.R<br>K.AVAASGAIAWTK.T<br>K.ALGATEEADGDDNGNATAPARDPASMRL.L<br>K.AAADEEHWR.L<br>R.WGIAVDSAGQPLAR.T<br>R.LAALAGDLPQALDGVPLTDLAAR.I<br>R.AGANAFAEAEALALRDDPALDAIAR.A<br>R.YADVILGLTEGVLVPSNR.A<br>R.QGLEWLTGEAAWTPAGR.M<br>R.AFADALAAGLIDR.Y<br>K.AAFDKLDNQLGLLIAR.R<br>R.YTPAGEPPVGAFAAQLAGGLAR.V<br>R.SAVQAAVFR.A<br>R.FVWAAAGITTAAPAIAR.L<br>K.LDNQLGLLIAR.R<br>R.WPAATQPDVWLPAGIR.R<br>K.SAAEAVDHAADALAGLAR.Y<br>R.IAPFVYTGILVSR.R<br>K.ALPLITGDPILLVNSDNIWTDGPQDSIR.H<br>R.RLLDAPDGPFTNINLWDR.A<br>R.LLDGAPDGPFTNINLWDR.A<br>R.GLLIEDFGVDR.L<br>R.AAWEAALTPVESDGLPR.V<br>R.DIENAYWALAAQR.N<br>R.IPLAGDASFR.R<br>R.DVSPAEEAAMLAR.Y<br>R.DLAHPALVPR.Q<br>R.LRETVAAPDR.E<br>R.ILGVFR.L<br>K.GQQAGTDTGGIGLALR.Q<br>R.QIDNVLDLAQGEAGTALIER.A<br>R.LSAAVAQFQDQGLAFANLPPR.R<br>R.LASLVEASPOLPVIVR.A<br>R.NEALAEADKAK.T<br>R.LVAGLLDNAVR.F<br>R.AAFAGQAEK.L<br>K.GVSEITTTGVR.L<br>R.SEQYQNDVYVLPK.H<br>K.KGELFPAINNDVSTK.S<br>K.WATVACFGDVGK.G<br>K.GESLADYDYYGR.I<br>K.WTEVKQVDLVEFPDGK.Q<br>K.AFIAAKPGYLT.T<br>R.IFDWESDNDGR.T<br>R.TANLILDDGGDATMFLWGA.L<br>R.DYVADIGLADFRK.E<br>K.EINIAETEMGLMALR.A<br>R.DYVADIGLADFRK.K<br>K.VAALHLEK.L                                                                                                                                                                                                                                                                                                                                                                                                                                                                                                                                                                                                                                                                                                                                                                                                                                                                                                                                                                                                                                                                                                                                                                                                                                                                                                                                                                                                                                                                                                                                                                                                                                                                                                                                                                                                            |
| YP_615216 | Sala_0159 | Nucleotidyl transferase                             | 25.52%            | 4                       | R.IAPFVYTGILVSR.R<br>K.ALPLITGDPILLVNSDNIWTDGPQDSIR.H<br>R.RLLDAPDGPFTNINLWDR.A<br>R.LLDGAPDGPFTNINLWDR.A<br>R.GLLIEDFGVDR.L<br>R.AAWEAALTPVESDGLPR.V<br>R.DIENAYWALAAQR.N<br>R.IPLAGDASFR.R<br>R.DVSPAEEAAMLAR.Y<br>R.DLAHPALVPR.Q<br>R.LRETVAAPDR.E<br>R.ILGVFR.L<br>K.GQQAGTDTGGIGLALR.Q<br>R.QIDNVLDLAQGEAGTALIER.A<br>R.LSAAVAQFQDQGLAFANLPPR.R<br>R.LASLVEASPOLPVIVR.A<br>R.NEALAEADKAK.T<br>R.LVAGLLDNAVR.F<br>R.AAFAGQAEK.L<br>K.GVSEITTTGVR.L<br>R.SEQYQNDVYVLPK.H<br>K.KGELFPAINNDVSTK.S<br>K.WATVACFGDVGK.G<br>K.GESLADYDYYGR.I<br>K.WTEVKQVDLVEFPDGK.Q<br>K.AFIAAKPGYLT.T<br>R.IFDWESDNDGR.T<br>R.TANLILDDGGDATMFLWGA.L<br>R.DYVADIGLADFRK.E<br>K.EINIAETEMGLMALR.A<br>R.DYVADIGLADFRK.K<br>K.VAALHLEK.L                                                                                                                                                                                                                                                                                                                                                                                                                                                                                                                                                                                                                                                                                                                                                                                                                                                                                                                                                                                                                                                                                                                                                                                                                                                                                                                                                                                                                                                                                                                                                                                                                                                                                                                                                                                                                                                                                                                                                                                                                                                                                                                                                                                                                                                                                                                                                                                                                                                                                                                                                                                                                                                                                             |
| YP_615217 | Sala_0160 | aminoglycoside phosphotransferase                   | 29.41%            | 8                       | R.AAWEAALTPVESDGLPR.V<br>R.DIENAYWALAAQR.N<br>R.IPLAGDASFR.R<br>R.DVSPAEEAAMLAR.Y<br>R.DLAHPALVPR.Q<br>R.LRETVAAPDR.E<br>R.ILGVFR.L<br>K.GQQAGTDTGGIGLALR.Q<br>R.QIDNVLDLAQGEAGTALIER.A<br>R.LSAAVAQFQDQGLAFANLPPR.R<br>R.LASLVEASPOLPVIVR.A<br>R.NEALAEADKAK.T<br>R.LVAGLLDNAVR.F<br>R.AAFAGQAEK.L<br>K.GVSEITTTGVR.L<br>R.SEQYQNDVYVLPK.H<br>K.KGELFPAINNDVSTK.S<br>K.WATVACFGDVGK.G<br>K.GESLADYDYYGR.I<br>K.WTEVKQVDLVEFPDGK.Q<br>K.AFIAAKPGYLT.T<br>R.IFDWESDNDGR.T<br>R.TANLILDDGGDATMFLWGA.L<br>R.DYVADIGLADFRK.E<br>K.EINIAETEMGLMALR.A<br>R.DYVADIGLADFRK.K<br>K.VAALHLEK.L                                                                                                                                                                                                                                                                                                                                                                                                                                                                                                                                                                                                                                                                                                                                                                                                                                                                                                                                                                                                                                                                                                                                                                                                                                                                                                                                                                                                                                                                                                                                                                                                                                                                                                                                                                                                                                                                                                                                                                                                                                                                                                                                                                                                                                                                                                                                                                                                                                                                                                                                                                                                                                                                                                                                                                                                                             |
| YP_615219 | Sala_0162 | PAS/PAC sensor signal transduction histidine kinase | 13.60%            | 7                       | K.GQQAGTDTGGIGLALR.Q<br>R.QIDNVLDLAQGEAGTALIER.A<br>R.LSAAVAQFQDQGLAFANLPPR.R<br>R.LASLVEASPOLPVIVR.A<br>R.NEALAEADKAK.T<br>R.LVAGLLDNAVR.F<br>R.AAFAGQAEK.L<br>K.GVSEITTTGVR.L<br>R.SEQYQNDVYVLPK.H<br>K.KGELFPAINNDVSTK.S<br>K.WATVACFGDVGK.G<br>K.GESLADYDYYGR.I<br>K.WTEVKQVDLVEFPDGK.Q<br>K.AFIAAKPGYLT.T<br>R.IFDWESDNDGR.T<br>R.TANLILDDGGDATMFLWGA.L<br>R.DYVADIGLADFRK.E<br>K.EINIAETEMGLMALR.A<br>R.DYVADIGLADFRK.K<br>K.VAALHLEK.L                                                                                                                                                                                                                                                                                                                                                                                                                                                                                                                                                                                                                                                                                                                                                                                                                                                                                                                                                                                                                                                                                                                                                                                                                                                                                                                                                                                                                                                                                                                                                                                                                                                                                                                                                                                                                                                                                                                                                                                                                                                                                                                                                                                                                                                                                                                                                                                                                                                                                                                                                                                                                                                                                                                                                                                                                                                                                                                                                                    |
| YP_615220 | Sala_0163 | adenosylhomocysteinase                              | 77.33%            | 37                      | R.SEQYQNDVYVLPK.H<br>K.KGELFPAINNDVSTK.S<br>K.WATVACFGDVGK.G<br>K.GESLADYDYYGR.I<br>K.WTEVKQVDLVEFPDGK.Q<br>K.AFIAAKPGYLT.T<br>R.IFDWESDNDGR.T<br>R.TANLILDDGGDATMFLWGA.L<br>R.DYVADIGLADFRK.E<br>K.EINIAETEMGLMALR.A<br>R.DYVADIGLADFRK.K<br>K.VAALHLEK.L                                                                                                                                                                                                                                                                                                                                                                                                                                                                                                                                                                                                                                                                                                                                                                                                                                                                                                                                                                                                                                                                                                                                                                                                                                                                                                                                                                                                                                                                                                                                                                                                                                                                                                                                                                                                                                                                                                                                                                                                                                                                                                                                                                                                                                                                                                                                                                                                                                                                                                                                                                                                                                                                                                                                                                                                                                                                                                                                                                                                                                                                                                                                                       |



| Accession | Locus tag | Description                                                             | Sequence coverage | No. peptides identified | List of peptides identified                                                                                                                                                                                                                                                                                                                                                                                                                                                                                                                                                                                                                                                                                                                                                                                                                                                                                                                                                                                                                                                                                                                                                                                                                                                                                                                                                                                                                                                                                                                                                                                                                                                                                                                                                                                                                                                                                                                                                                                                                                                                                                                                                                                                                                                                                                                                                                                                                                                                                                                                                                                                                                                                                                                                                                                                                                                                                                                                                                                                                                                                                                                                                                                                                                                                                                                                                                                                         |
|-----------|-----------|-------------------------------------------------------------------------|-------------------|-------------------------|-------------------------------------------------------------------------------------------------------------------------------------------------------------------------------------------------------------------------------------------------------------------------------------------------------------------------------------------------------------------------------------------------------------------------------------------------------------------------------------------------------------------------------------------------------------------------------------------------------------------------------------------------------------------------------------------------------------------------------------------------------------------------------------------------------------------------------------------------------------------------------------------------------------------------------------------------------------------------------------------------------------------------------------------------------------------------------------------------------------------------------------------------------------------------------------------------------------------------------------------------------------------------------------------------------------------------------------------------------------------------------------------------------------------------------------------------------------------------------------------------------------------------------------------------------------------------------------------------------------------------------------------------------------------------------------------------------------------------------------------------------------------------------------------------------------------------------------------------------------------------------------------------------------------------------------------------------------------------------------------------------------------------------------------------------------------------------------------------------------------------------------------------------------------------------------------------------------------------------------------------------------------------------------------------------------------------------------------------------------------------------------------------------------------------------------------------------------------------------------------------------------------------------------------------------------------------------------------------------------------------------------------------------------------------------------------------------------------------------------------------------------------------------------------------------------------------------------------------------------------------------------------------------------------------------------------------------------------------------------------------------------------------------------------------------------------------------------------------------------------------------------------------------------------------------------------------------------------------------------------------------------------------------------------------------------------------------------------------------------------------------------------------------------------------------------|
|           |           |                                                                         |                   |                         | R.RGTDVMLAGK.V<br>R.AEYGASQPLK.GAR.I<br>R.AEYGASQPLK.G<br>R.GTDVMLAGK.V<br>R.SDIFVTATGNADVITAEHMAAMK.N<br>K.LEAGETMPPEEEVEEMQR.A<br>K.VATVAGFDVKGKSAQSLR.N<br>K.QADYIGVPEVGFPPKPDHYR.Y<br>R.LVNLGNATGHPSFVMSASFTNQTLAQIELWTR.S<br>R.ITGSLHMTIQTAVLIETLTALGAEVR.W<br>K.SKFDNLYGCK.E<br>K.QIILSK.G<br>K.FDNLYGCK.E<br>K.EINIAETEMPGMLALR.A<br>K.EINIAETEMPGMLALR.A<br>R.TANLLDDGGDATMFALWGAK.L<br>R.LVHIAK.K<br>R.ITGSLHMTIQTAVLIETLTALGAEVR.W<br>R.GTDVMLAGK.V<br>K.RSDIFVTATGNADVITAEHMAAMK.N<br>K.NMAIVCNIGHFDEIQAALANVK.W<br>K.LEAGETMPPEEEVEEMQR.A<br>K.LEAGETMPPEEEVEEMQR.A<br>K.EINIAETEMPGMLALR.A<br>R.WQAFAEAGVDAR.L<br>R.DWGGEGAVLVADR.W<br>K.VTENGPEQVSAADYFK.G<br>R.FSMIINDGVVEQLNVEAPGEFK.V<br>R.VALFVVGAFPTCSAK.H<br>K.SANAGDAVTLADGNAGFAEAVGLTMDGTAFGMGK.R<br>K.MTIQPGDKLPDQATFK.V<br>K.HLPGFVEKADALK.A<br>K.GVDEIACTAVNDAFVVMGAWK.S<br>K.VTENGPEQVSAADYFKGR.R<br>K.VSSADHMLEQL<br>R.HYTGTAPEHFQR.Y<br>R.LPPADAAATGLFDYPAIR.L<br>R.SSQESTDPAAR.I<br>R.IDAIIAELQDKFR.A<br>R.AGTFTVTRPDLFADYLR.E<br>R.EEQAGHLSFGFR.F<br>R.AIGIDMESATIAAQGYR.F<br>R.TGTVTTDDRNLWELR.Y<br>R.RLPPADAAATGLFDYPAIR.L<br>R.DDHILDVLPPEIPIPAEVEVQALASAAESVSGTSGADLK.K<br>R.IGDYYLAHAYLR.D<br>R.HQMPAYHILAPDGGGTLVNIIGVGPSNAK.T<br>R.YTALAGAGLYDQPGVNASALVADSAR.W<br>R.HYDVEIEVTR.T<br>R.YVDFVAVAGAQVGR.G<br>R.YILFTNHR.Y<br>R.VVFGQNTAIVLSSAIK.L<br>K.ETALDQFTVNLNEK.A<br>R.YTPDAINAAVDLSAR.Y<br>R.NRLDAIVPFGYLPPEVVAR.V<br>R.SKNNPLYVGDVGVGK.T<br>K.IKQPLAEELFGK.L<br>K.IDVVPTLEDTK.I<br>K.QLASIMGILQR.F<br>R.SFAEHHQVR.Y<br>R.ESYAVYFLQQDLTR.L<br>K.TGEDAHIGNPLAFETPAAPK.G<br>K.TAIAEGLAR.K<br>R.LDAVSYLSHGVGK.G<br>R.AILHVSSGKDEVTGANVLVLFSE.E<br>R.NVHQLDDAAR.E<br>R.KIIEGQVPEVLLPAVIYSLDMGALLAGTR.Y<br>R.ESIGFGQQR.E<br>K.VEGHSDPSPTSGFQR.V<br>R.LDAIVPFGYLPPEVVAR.V<br>K.NWPLYVGDVGVGK.T<br>K.MKTGEDAHIGNPLAFETPAAPK.G<br>R.ACCVALDQLQSAVHYLDELDSLK.V<br>K.TGKVDPLIGR.S<br>K.IIEGDVPEVLLPAVIYSLDMGALLAGTR.Y<br>K.IDVVPTLEDTK.K<br>K.AIDVIDEVGAMQMLVAPSKR.K<br>K.AHPDLFNLLQVMDNGR.L<br>R.YRQDFEER.L<br>R.VVDKFILELELQADR.N<br>R.NHFEDR.A<br>R.LTDHGGK.T<br>R.FQKIDVVEPTLEDTK.I<br>R.FDMSEYMER.H<br>R.EIEAVIATMAR.I<br>R.EDAQEEAVKR.M<br>K.DEVTGANVLVLFSE.E<br>K.LTHQNTANAR.Q<br>R.QVNAIDPDTQAEAR.I<br>R.FSELTNDGRRPEVAIAPETDVALIQTGGTGTGPK.G<br>R.LIVGSAAGLSK.T<br>R.TGDAVIEEGYIR.I<br>K.GPQVMQGYWNRPEADAESFTADGWLR.T<br>R.GLFGFSPK.L<br>K.LGGIFGGDEDEIKEIETTIR.A<br>R.EVGEAAADAAR.E<br>K.TATMSYFATIDGGR.T<br>R.DGVLITPLALGLLPGVLR.G<br>R.LPEGVGAVDVL.R.A<br>R.LAPSGALAVEVPLPR.L<br>R.LADLSAGFFLGNLSR.G<br>R.LADGADAAALR.A<br>R.GAVDQVVGAMPLGWFGLFTGVQR.I<br>R.ADVPVAGDPLAVYAR.L<br>K.ASAATLGFADR.H<br>R.DNDLDYGLDQITVNVGK.H<br>R.IGYAGGPAWLK.A<br>R.WVIFNSPNSGAAYSAPAEIDAIGEVR.R<br>K.TPSGQVIDSDEALIDYFLDSAR.V<br>K.ITPGQLDAAITPR.T<br>R.VAAVHGAAGFLSPAFR.V<br>K.KTPSGQVIDSDEALIDYFLDSAR.V<br>R.LKAEVDVIGLSAGEPFDTPDFVK.E<br>R.VSYATSEAVL.K.E<br>R.WVIFNSPNSGAAYSAPAEIDAIGEVR.R<br>K.AEGVDVIGLSAGEPFDTPDFVK.E<br>K.YTLVDGTVALK.E<br>K.HTLFNALVATVDK.G<br>K.AYAMTGWR.I<br>R.IQPSATLAMTAR.V<br>R.TRVVIFNSPNSGAAYSAPAEIDAIGEVR.R<br>R.DNDLDYGLDQITVNVGK.H<br>K.EAAIEAIR.A<br>K.AEGVDVIGLSAGEPFDTPDFVKEAAIEAIR.A<br>R.LKAEVDVIGLSAGEPFDTPDFVKEAAIEAIR.A<br>K.GDEVIIPAPYVWVSPDIAVAFAGGTPVFAASAAQHYK.I<br>K.AYAMTGWR.I<br>R.IVYDPTQVSYGTLLR.I<br>R.YELTHDGTSGHAEAVR.I<br>R.QVATYLAQIGR.G<br>R.ILFSVADPTLKR.Q<br>R.AAIVPLDATQR.Q<br>R.ILFSVADPTLKR.D<br>K.LPALTDPVAPAKR.A<br>R.AQAPVEQTSQPR.A<br>K.GSTAGYNDIGIATAPDGT.R.Y<br>R.IGPEDLTFYQPIAAR.V |
| YP_615222 | Sala_0165 | protein of unknown function DUF179                                      | 12.15%            | 2                       |                                                                                                                                                                                                                                                                                                                                                                                                                                                                                                                                                                                                                                                                                                                                                                                                                                                                                                                                                                                                                                                                                                                                                                                                                                                                                                                                                                                                                                                                                                                                                                                                                                                                                                                                                                                                                                                                                                                                                                                                                                                                                                                                                                                                                                                                                                                                                                                                                                                                                                                                                                                                                                                                                                                                                                                                                                                                                                                                                                                                                                                                                                                                                                                                                                                                                                                                                                                                                                     |
| YP_615223 | Sala_0166 | alkyl hydroperoxide reductase/ Thiol specific antioxidant/ Mal allergen | 91.62%            | 9                       |                                                                                                                                                                                                                                                                                                                                                                                                                                                                                                                                                                                                                                                                                                                                                                                                                                                                                                                                                                                                                                                                                                                                                                                                                                                                                                                                                                                                                                                                                                                                                                                                                                                                                                                                                                                                                                                                                                                                                                                                                                                                                                                                                                                                                                                                                                                                                                                                                                                                                                                                                                                                                                                                                                                                                                                                                                                                                                                                                                                                                                                                                                                                                                                                                                                                                                                                                                                                                                     |
| YP_615224 | Sala_0167 | AMP nucleosidase                                                        | 53.35%            | 16                      |                                                                                                                                                                                                                                                                                                                                                                                                                                                                                                                                                                                                                                                                                                                                                                                                                                                                                                                                                                                                                                                                                                                                                                                                                                                                                                                                                                                                                                                                                                                                                                                                                                                                                                                                                                                                                                                                                                                                                                                                                                                                                                                                                                                                                                                                                                                                                                                                                                                                                                                                                                                                                                                                                                                                                                                                                                                                                                                                                                                                                                                                                                                                                                                                                                                                                                                                                                                                                                     |
| YP_615225 | Sala_0168 | ATPase AAA-2                                                            | 54.17%            | 36                      |                                                                                                                                                                                                                                                                                                                                                                                                                                                                                                                                                                                                                                                                                                                                                                                                                                                                                                                                                                                                                                                                                                                                                                                                                                                                                                                                                                                                                                                                                                                                                                                                                                                                                                                                                                                                                                                                                                                                                                                                                                                                                                                                                                                                                                                                                                                                                                                                                                                                                                                                                                                                                                                                                                                                                                                                                                                                                                                                                                                                                                                                                                                                                                                                                                                                                                                                                                                                                                     |
| YP_615226 | Sala_0169 | AMP-dependent synthetase and ligase                                     | 20.40%            | 6                       |                                                                                                                                                                                                                                                                                                                                                                                                                                                                                                                                                                                                                                                                                                                                                                                                                                                                                                                                                                                                                                                                                                                                                                                                                                                                                                                                                                                                                                                                                                                                                                                                                                                                                                                                                                                                                                                                                                                                                                                                                                                                                                                                                                                                                                                                                                                                                                                                                                                                                                                                                                                                                                                                                                                                                                                                                                                                                                                                                                                                                                                                                                                                                                                                                                                                                                                                                                                                                                     |
| YP_615227 | Sala_0170 | hypothetical protein                                                    | 31.82%            | 4                       |                                                                                                                                                                                                                                                                                                                                                                                                                                                                                                                                                                                                                                                                                                                                                                                                                                                                                                                                                                                                                                                                                                                                                                                                                                                                                                                                                                                                                                                                                                                                                                                                                                                                                                                                                                                                                                                                                                                                                                                                                                                                                                                                                                                                                                                                                                                                                                                                                                                                                                                                                                                                                                                                                                                                                                                                                                                                                                                                                                                                                                                                                                                                                                                                                                                                                                                                                                                                                                     |
| YP_615228 | Sala_0171 | para-aminobenzoate synthase, component I                                | 20.26%            | 8                       |                                                                                                                                                                                                                                                                                                                                                                                                                                                                                                                                                                                                                                                                                                                                                                                                                                                                                                                                                                                                                                                                                                                                                                                                                                                                                                                                                                                                                                                                                                                                                                                                                                                                                                                                                                                                                                                                                                                                                                                                                                                                                                                                                                                                                                                                                                                                                                                                                                                                                                                                                                                                                                                                                                                                                                                                                                                                                                                                                                                                                                                                                                                                                                                                                                                                                                                                                                                                                                     |
| YP_615229 | Sala_0172 | aminotransferase, class I and II                                        | 66.25%            | 22                      |                                                                                                                                                                                                                                                                                                                                                                                                                                                                                                                                                                                                                                                                                                                                                                                                                                                                                                                                                                                                                                                                                                                                                                                                                                                                                                                                                                                                                                                                                                                                                                                                                                                                                                                                                                                                                                                                                                                                                                                                                                                                                                                                                                                                                                                                                                                                                                                                                                                                                                                                                                                                                                                                                                                                                                                                                                                                                                                                                                                                                                                                                                                                                                                                                                                                                                                                                                                                                                     |
| YP_615230 | Sala_0173 | peptide methionine sulfoxide reductase                                  | 35.81%            | 7                       |                                                                                                                                                                                                                                                                                                                                                                                                                                                                                                                                                                                                                                                                                                                                                                                                                                                                                                                                                                                                                                                                                                                                                                                                                                                                                                                                                                                                                                                                                                                                                                                                                                                                                                                                                                                                                                                                                                                                                                                                                                                                                                                                                                                                                                                                                                                                                                                                                                                                                                                                                                                                                                                                                                                                                                                                                                                                                                                                                                                                                                                                                                                                                                                                                                                                                                                                                                                                                                     |
| YP_615231 | Sala_0174 | Beta-lactamase                                                          | 44.07%            | 10                      |                                                                                                                                                                                                                                                                                                                                                                                                                                                                                                                                                                                                                                                                                                                                                                                                                                                                                                                                                                                                                                                                                                                                                                                                                                                                                                                                                                                                                                                                                                                                                                                                                                                                                                                                                                                                                                                                                                                                                                                                                                                                                                                                                                                                                                                                                                                                                                                                                                                                                                                                                                                                                                                                                                                                                                                                                                                                                                                                                                                                                                                                                                                                                                                                                                                                                                                                                                                                                                     |



| Accession | Locus tag | Description                                                                  | Sequence coverage | No. peptides identified | List of peptides identified                                                                                                                                                                                                                                                                                                                                                                                                                                                                                                                                                                                                                                                                                                                                                                                                                                                                                                                                                                                                                                                                                                                                                                                                                                                                                                                                                                                                                                                                                                                                                                                                                                                                                                                                                                                                                                                                                                                                                                                                                                                                                                                                                                                                                                                                                                                                                                                                                                                                                                                                                                                                                                                                                                                                                                                                                                                                                                                                                                                                                                                                                                                                                                                                                                                                                                                                                                                                         |
|-----------|-----------|------------------------------------------------------------------------------|-------------------|-------------------------|-------------------------------------------------------------------------------------------------------------------------------------------------------------------------------------------------------------------------------------------------------------------------------------------------------------------------------------------------------------------------------------------------------------------------------------------------------------------------------------------------------------------------------------------------------------------------------------------------------------------------------------------------------------------------------------------------------------------------------------------------------------------------------------------------------------------------------------------------------------------------------------------------------------------------------------------------------------------------------------------------------------------------------------------------------------------------------------------------------------------------------------------------------------------------------------------------------------------------------------------------------------------------------------------------------------------------------------------------------------------------------------------------------------------------------------------------------------------------------------------------------------------------------------------------------------------------------------------------------------------------------------------------------------------------------------------------------------------------------------------------------------------------------------------------------------------------------------------------------------------------------------------------------------------------------------------------------------------------------------------------------------------------------------------------------------------------------------------------------------------------------------------------------------------------------------------------------------------------------------------------------------------------------------------------------------------------------------------------------------------------------------------------------------------------------------------------------------------------------------------------------------------------------------------------------------------------------------------------------------------------------------------------------------------------------------------------------------------------------------------------------------------------------------------------------------------------------------------------------------------------------------------------------------------------------------------------------------------------------------------------------------------------------------------------------------------------------------------------------------------------------------------------------------------------------------------------------------------------------------------------------------------------------------------------------------------------------------------------------------------------------------------------------------------------------------|
| YP_615242 | Sala_0185 | alpha-glucosidase                                                            | 83.97%            | 48                      | K.DNDKADWYVADAR.A<br>R.IDAINFAMHDPFRDNPPAPSNK.V<br>K.TGYVADAGGIAPGATPGSK.A<br>K.QVPTDWAESHLAGAVGDYAFAR.K<br>K.HGFGVLVEGWNK.G<br>K.GWNSNWFHGDAYSFTEAYPDFDK.A<br>R.LFDDGIGFR.Y<br>R.ISDDAAGLVESDLELNLNEPNK.L<br>R.IEGSETASADSR.W<br>R.TLTSDFDLDPK.T<br>K.SADWYVGGVNDGTER.T<br>R.KSADWYVGGVNDGTER.T<br>R.GPWSWAEQPNHGATTER.T<br>R.ATLAPSSQGR.V<br>K.DGDGATYLDAR.R<br>R.LADGTHLAFHEALVDYAGMWLK.R<br>R.DQHNELVV.F<br>K.LGFLMADR.V<br>K.VAVNPHPEVKDTGLR.R<br>K.GAEDVPMSTLAK.Q<br>R.YEQVYQTPIDAVSTAHTPITMR.L<br>R.GMEYNWAGAFANNPDHEPTLVYTR.M<br>K.AMEWHDGQR.Q<br>R.SLVLVTTDNDARPTWLSR.K<br>R.QHESWGGHAMNVR.F<br>R.MLSGPMYTPGVFSLK.G<br>R.TKQYIDFAAK.H<br>R.FVVDQHNELVV.F<br>K.GVTLGHETGGNIAYEAQLDDAMK.L<br>R.NIAYDTIK.V<br>R.LFDDGIGFRYELPEQGLK.T<br>R.DLPFATPWR.T<br>K.YIGIWWGMIR.G<br>K.VAVNPHPEVK.D<br>K.LWLAPGGGAAMR.V<br>K.LGDVSWVKPMK.Y<br>R.YEQVYQTPIDAVSTAHTPITMR.L<br>R.WEQPWGER.R<br>R.QVQHVK.V<br>K.TYTATTWKGDDGATYLDAR.R<br>K.LLIAPSK.L<br>K.IADETFEDIAEAGTAWIAGGEWNR.Y<br>R.YELPEQGLK.T<br>R.GMEYNWAGAFANNPDHEPTLVYTR.M<br>R.GFRIEGSETASADSR.W<br>R.FRQHESWGGHAMNVR.F<br>R.FRLFDGIGFR.Y<br>R.ELAFVK.Q<br>K.QLGLYLATYSPIQMAADFIENLEAHR.E<br>K.GAEDVPMSTLAK.Q<br>R.VALETIADGGTAR.R<br>R.TPNEAFLYIFVR.E<br>R.YDADTHVPGWDDAFALIGR.H<br>R.SHDQFNTIYSYNDY.R<br>R.FTEPDIVQMATFGSTEISSEFVHIK.I<br>K.VLLEQSVTK.G<br>R.LLLDFIEGDTLTVR.R<br>R.EVNAQVGDFAEDR.V<br>R.AALTEYLPEDRIEAAVVDGFLAR.I<br>R.VSYVDGALK.D<br>R.PIGVLTSPSMFPIAQLK.A<br>K.QYSSGAVNGAAGVYADELQPSNTETVALK.A<br>K.VETLVFGATGDLAQR.M<br>K.LDANMMIINLQPEENIR.V<br>R.RDEVEQWEDAIR.D<br>R.IAMEKPIGHDLASSR.E<br>K.SEVLQKVPVHNIFAR.V<br>R.IDHYLGKTVQNLALR.F<br>K.ETVQNLALR.F<br>R.AALTEYLPEDR.I<br>R.MLFPSTLYNLHMDGLLADALTVSSGR.S<br>R.IEAVVDGFLAR.I<br>R.FANMLFELWNAQIDHVQITVAETVLEGR.V<br>R.DAWDQVDMTPQSYTAGSWGSSAIALIER.D<br>R.VGAGKLDANMMIINLQPEENIR.V<br>R.IDHYLGK.E<br>R.IDYCAIDAGAGTGYAELALLGDR.M<br>R.IAMEKPIGHDLASSR.E<br>K.LKEVTMDVLSHSHFAGER.R<br>K.DMVQNHMLQLLAIAMEPPASVGATAVR.D<br>K.AANIACAECR.I<br>R.RIAYER.L<br>K.LKEVTMDVLSHSHFAGER.R<br>R.IFDQONQVLAAR.A<br>R.AAGIIDWQDFDELHSHAVLLAR.V<br>K.IVPGLLIGALR.F<br>K.TSAVAEDRWITIEAPAR.I<br>R.IAQIGWDGDDYRPLGR.C<br>R.GEVAALVDETEVAAR.S<br>K.AGELDRDVVVVR.F<br>K.AIVNAIAGLLATGGSTNHAIHLPALAR.A<br>K.VPAVHLSPEALPGDMSGPLAYLR.D<br>K.LTPALGLQDK.G<br>R.SPAAAPPAVGVGR.E<br>K.GGSAVLAAMEAVT.<br>R.HHADAEEK.G<br>R.FGHLRQLVPAQPMPSGLANK.E<br>R.TGAAMNIGIVTAYNDMLSAHQPYGR.Y<br>R.RAAYLDLMDR.Q<br>R.HHADAEEKGSVLAAMEAVT.<br>R.VYPNGAGDYNQFHAAGIGFVVR.E<br>R.GNLSGCGNLHGFAGGDKPVIR.T<br>R.FGHLRQLVPAQPMPSGLANK.E<br>R.ELLGAGLLHGDVLTGGTMADYAAEPLVNDLHWQAAGQSR.D<br>R.DDTMLRPVDFPSPDGMGR.L<br>R.AAYLDLMDR.Q<br>K.VPAVHLSPEALPGDMSGPLAYLR.D<br>R.VALLTDR.M<br>R.TGAAMNIGIVTAYNDMLSAHQPYGRYPEQIK.L<br>R.DNIAQGTVIALSHAMFEGALLGICDK.I<br>K.TSAVAEDR.W<br>R.VPGVAVGAGTVLNPR.M<br>K.FFPAATSGGIPALK.A<br>K.RVPGAVVAGATVLNPR.M<br>R.TPALLDAIR.A<br>R.VEDAVPMAEALVAGGLR.V<br>R.CVGGSWVVPAGPLDVRIEALAK.E<br>K.ALAGPFGVNFCTGGISATAPEWLALPEVR.C<br>R.TLGGQPEVSAESVAR.E<br>K.GVDEQSFIDFGEELYR.H<br>K.GVDEQSFIDFGEELYR.K<br>K.GAFHLAMQAGVPIVPIVHNATDVARK.N<br>K.LVEAYIAEVVASLDK.I<br>R.LLNATIPNVLR.E<br>R.LAGLIPDLTFQAYEISGR.H<br>K.KLVEAYIAEVVASLDK.I<br>K.IDVAGDDGPHR.S<br>K.AGGGQAQCGQANVSAGQTGAOK.F<br>R.VVGAIDWQDGAOK.A<br>R.GTAAPTATFTGPDAPVTLADFR.G<br>K.KALQYLDPENGLLDAANSALPTSIYDAEGR.E<br>R.IDAGLAALQSALLQ.R.A<br>R.ALASGYSTATDLADWLVR.E<br>R.LNESPLGAALAGTGFVDR.D<br>R.FGGGPAIMQENASIPDKR.L<br>R.AGLLGAFQR.L<br>R.LWEEDIAASR.A |
| YP_615243 | Sala_0186 | Oxidoreductase alpha (molybdopterin) subunit                                 | 13.23%            | 6                       | K.QLGLYLATYSPIQMAADFIENLEAHR.E<br>K.GAEDVPMSTLAK.Q<br>R.VALETIADGGTAR.R<br>R.TPNEAFLYIFVR.E<br>R.YDADTHVPGWDDAFALIGR.H<br>R.SHDQFNTIYSYNDY.R<br>R.FTEPDIVQMATFGSTEISSEFVHIK.I<br>K.VLLEQSVTK.G<br>R.LLLDFIEGDTLTVR.R<br>R.EVNAQVGDFAEDR.V<br>R.AALTEYLPEDRIEAAVVDGFLAR.I<br>R.VSYVDGALK.D<br>R.PIGVLTSPSMFPIAQLK.A<br>K.QYSSGAVNGAAGVYADELQPSNTETVALK.A<br>K.VETLVFGATGDLAQR.M<br>K.LDANMMIINLQPEENIR.V<br>R.RDEVEQWEDAIR.D<br>R.IAMEKPIGHDLASSR.E<br>K.SEVLQKVPVHNIFAR.V<br>R.IDHYLGKTVQNLALR.F<br>K.ETVQNLALR.F<br>R.AALTEYLPEDR.I<br>R.MLFPSTLYNLHMDGLLADALTVSSGR.S<br>R.IEAVVDGFLAR.I<br>R.FANMLFELWNAQIDHVQITVAETVLEGR.V<br>R.DAWDQVDMTPQSYTAGSWGSSAIALIER.D<br>R.VGAGKLDANMMIINLQPEENIR.V<br>R.IDHYLGK.E<br>R.IDYCAIDAGAGTGYAELALLGDR.M<br>R.IAMEKPIGHDLASSR.E<br>K.LKEVTMDVLSHSHFAGER.R<br>K.DMVQNHMLQLLAIAMEPPASVGATAVR.D<br>K.AANIACAECR.I<br>R.RIAYER.L<br>K.LKEVTMDVLSHSHFAGER.R<br>R.IFDQONQVLAAR.A<br>R.AAGIIDWQDFDELHSHAVLLAR.V<br>K.IVPGLLIGALR.F<br>K.TSAVAEDRWITIEAPAR.I<br>R.IAQIGWDGDDYRPLGR.C<br>R.GEVAALVDETEVAAR.S<br>K.AGELDRDVVVVR.F<br>K.AIVNAIAGLLATGGSTNHAIHLPALAR.A<br>K.VPAVHLSPEALPGDMSGPLAYLR.D<br>K.LTPALGLQDK.G<br>R.SPAAAPPAVGVGR.E<br>K.GGSAVLAAMEAVT.<br>R.HHADAEEK.G<br>R.FGHLRQLVPAQPMPSGLANK.E<br>R.TGAAMNIGIVTAYNDMLSAHQPYGR.Y<br>R.RAAYLDLMDR.Q<br>R.HHADAEEKGSVLAAMEAVT.<br>R.VYPNGAGDYNQFHAAGIGFVVR.E<br>R.GNLSGCGNLHGFAGGDKPVIR.T<br>R.FGHLRQLVPAQPMPSGLANK.E<br>R.ELLGAGLLHGDVLTGGTMADYAAEPLVNDLHWQAAGQSR.D<br>R.DDTMLRPVDFPSPDGMGR.L<br>R.AAYLDLMDR.Q<br>K.VPAVHLSPEALPGDMSGPLAYLR.D<br>R.VALLTDR.M<br>R.TGAAMNIGIVTAYNDMLSAHQPYGRYPEQIK.L<br>R.DNIAQGTVIALSHAMFEGALLGICDK.I<br>K.TSAVAEDR.W<br>R.VPGVAVGAGTVLNPR.M<br>K.FFPAATSGGIPALK.A<br>K.RVPGAVVAGATVLNPR.M<br>R.TPALLDAIR.A<br>R.VEDAVPMAEALVAGGLR.V<br>R.CVGGSWVVPAGPLDVRIEALAK.E<br>K.ALAGPFGVNFCTGGISATAPEWLALPEVR.C<br>R.TLGGQPEVSAESVAR.E<br>K.GVDEQSFIDFGEELYR.H<br>K.GVDEQSFIDFGEELYR.K<br>K.GAFHLAMQAGVPIVPIVHNATDVARK.N<br>K.LVEAYIAEVVASLDK.I<br>R.LLNATIPNVLR.E<br>R.LAGLIPDLTFQAYEISGR.H<br>K.KLVEAYIAEVVASLDK.I<br>K.IDVAGDDGPHR.S<br>K.AGGGQAQCGQANVSAGQTGAOK.F<br>R.VVGAIDWQDGAOK.A<br>R.GTAAPTATFTGPDAPVTLADFR.G<br>K.KALQYLDPENGLLDAANSALPTSIYDAEGR.E<br>R.IDAGLAALQSALLQ.R.A<br>R.ALASGYSTATDLADWLVR.E<br>R.LNESPLGAALAGTGFVDR.D<br>R.FGGGPAIMQENASIPDKR.L<br>R.AGLLGAFQR.L<br>R.LWEEDIAASR.A                                                                                                                                                                                                                                                                                                                                                                                                                                                                                                                                                                                                                                                                                                                                                                                                                                                                                                                                                                                                                                                                                                                |
| YP_615247 | Sala_0190 | glucose-6-phosphate 1-dehydrogenase                                          | 76.37%            | 27                      | K.QLGLYLATYSPIQMAADFIENLEAHR.E<br>K.GAEDVPMSTLAK.Q<br>R.VALETIADGGTAR.R<br>R.TPNEAFLYIFVR.E<br>R.YDADTHVPGWDDAFALIGR.H<br>R.SHDQFNTIYSYNDY.R<br>R.FTEPDIVQMATFGSTEISSEFVHIK.I<br>K.VLLEQSVTK.G<br>R.LLLDFIEGDTLTVR.R<br>R.EVNAQVGDFAEDR.V<br>R.AALTEYLPEDRIEAAVVDGFLAR.I<br>R.VSYVDGALK.D<br>R.PIGVLTSPSMFPIAQLK.A<br>K.QYSSGAVNGAAGVYADELQPSNTETVALK.A<br>K.VETLVFGATGDLAQR.M<br>K.LDANMMIINLQPEENIR.V<br>R.RDEVEQWEDAIR.D<br>R.IAMEKPIGHDLASSR.E<br>K.SEVLQKVPVHNIFAR.V<br>R.IDHYLGKTVQNLALR.F<br>K.ETVQNLALR.F<br>R.AALTEYLPEDR.I<br>R.MLFPSTLYNLHMDGLLADALTVSSGR.S<br>R.IEAVVDGFLAR.I<br>R.FANMLFELWNAQIDHVQITVAETVLEGR.V<br>R.DAWDQVDMTPQSYTAGSWGSSAIALIER.D<br>R.VGAGKLDANMMIINLQPEENIR.V<br>R.IDHYLGK.E<br>R.IDYCAIDAGAGTGYAELALLGDR.M<br>R.IAMEKPIGHDLASSR.E<br>K.LKEVTMDVLSHSHFAGER.R<br>K.DMVQNHMLQLLAIAMEPPASVGATAVR.D<br>K.AANIACAECR.I<br>R.RIAYER.L<br>K.LKEVTMDVLSHSHFAGER.R<br>R.IFDQONQVLAAR.A<br>R.AAGIIDWQDFDELHSHAVLLAR.V<br>K.IVPGLLIGALR.F<br>K.TSAVAEDRWITIEAPAR.I<br>R.IAQIGWDGDDYRPLGR.C<br>R.GEVAALVDETEVAAR.S<br>K.AGELDRDVVVVR.F<br>K.AIVNAIAGLLATGGSTNHAIHLPALAR.A<br>K.VPAVHLSPEALPGDMSGPLAYLR.D<br>K.LTPALGLQDK.G<br>R.SPAAAPPAVGVGR.E<br>K.GGSAVLAAMEAVT.<br>R.HHADAEEK.G<br>R.FGHLRQLVPAQPMPSGLANK.E<br>R.TGAAMNIGIVTAYNDMLSAHQPYGR.Y<br>R.RAAYLDLMDR.Q<br>R.HHADAEEKGSVLAAMEAVT.<br>R.VYPNGAGDYNQFHAAGIGFVVR.E<br>R.GNLSGCGNLHGFAGGDKPVIR.T<br>R.FGHLRQLVPAQPMPSGLANK.E<br>R.ELLGAGLLHGDVLTGGTMADYAAEPLVNDLHWQAAGQSR.D<br>R.DDTMLRPVDFPSPDGMGR.L<br>R.AAYLDLMDR.Q<br>K.VPAVHLSPEALPGDMSGPLAYLR.D<br>R.VALLTDR.M<br>R.TGAAMNIGIVTAYNDMLSAHQPYGRYPEQIK.L<br>R.DNIAQGTVIALSHAMFEGALLGICDK.I<br>K.TSAVAEDR.W<br>R.VPGVAVGAGTVLNPR.M<br>K.FFPAATSGGIPALK.A<br>K.RVPGAVVAGATVLNPR.M<br>R.TPALLDAIR.A<br>R.VEDAVPMAEALVAGGLR.V<br>R.CVGGSWVVPAGPLDVRIEALAK.E<br>K.ALAGPFGVNFCTGGISATAPEWLALPEVR.C<br>R.TLGGQPEVSAESVAR.E<br>K.GVDEQSFIDFGEELYR.H<br>K.GVDEQSFIDFGEELYR.K<br>K.GAFHLAMQAGVPIVPIVHNATDVARK.N<br>K.LVEAYIAEVVASLDK.I<br>R.LLNATIPNVLR.E<br>R.LAGLIPDLTFQAYEISGR.H<br>K.KLVEAYIAEVVASLDK.I<br>K.IDVAGDDGPHR.S<br>K.AGGGQAQCGQANVSAGQTGAOK.F<br>R.VVGAIDWQDGAOK.A<br>R.GTAAPTATFTGPDAPVTLADFR.G<br>K.KALQYLDPENGLLDAANSALPTSIYDAEGR.E<br>R.IDAGLAALQSALLQ.R.A<br>R.ALASGYSTATDLADWLVR.E<br>R.LNESPLGAALAGTGFVDR.D<br>R.FGGGPAIMQENASIPDKR.L<br>R.AGLLGAFQR.L<br>R.LWEEDIAASR.A                                                                                                                                                                                                                                                                                                                                                                                                                                                                                                                                                                                                                                                                                                                                                                                                                                                                                                                                                                                                                                                                                                                |
| YP_615248 | Sala_0191 | 6-phosphogluconate dehydratase                                               | 61.99%            | 28                      | K.LKEVTMDVLSHSHFAGER.R<br>R.IFDQONQVLAAR.A<br>R.AAGIIDWQDFDELHSHAVLLAR.V<br>K.IVPGLLIGALR.F<br>K.TSAVAEDRWITIEAPAR.I<br>R.IAQIGWDGDDYRPLGR.C<br>R.GEVAALVDETEVAAR.S<br>K.AGELDRDVVVVR.F<br>K.AIVNAIAGLLATGGSTNHAIHLPALAR.A<br>K.VPAVHLSPEALPGDMSGPLAYLR.D<br>K.LTPALGLQDK.G<br>R.SPAAAPPAVGVGR.E<br>K.GGSAVLAAMEAVT.<br>R.HHADAEEK.G<br>R.FGHLRQLVPAQPMPSGLANK.E<br>R.TGAAMNIGIVTAYNDMLSAHQPYGR.Y<br>R.RAAYLDLMDR.Q<br>R.HHADAEEKGSVLAAMEAVT.<br>R.VYPNGAGDYNQFHAAGIGFVVR.E<br>R.GNLSGCGNLHGFAGGDKPVIR.T<br>R.FGHLRQLVPAQPMPSGLANK.E<br>R.ELLGAGLLHGDVLTGGTMADYAAEPLVNDLHWQAAGQSR.D<br>R.DDTMLRPVDFPSPDGMGR.L<br>R.AAYLDLMDR.Q<br>K.VPAVHLSPEALPGDMSGPLAYLR.D<br>R.VALLTDR.M<br>R.TGAAMNIGIVTAYNDMLSAHQPYGRYPEQIK.L<br>R.DNIAQGTVIALSHAMFEGALLGICDK.I<br>K.TSAVAEDR.W<br>R.VPGVAVGAGTVLNPR.M<br>K.FFPAATSGGIPALK.A<br>K.RVPGAVVAGATVLNPR.M<br>R.TPALLDAIR.A<br>R.VEDAVPMAEALVAGGLR.V<br>R.CVGGSWVVPAGPLDVRIEALAK.E<br>K.ALAGPFGVNFCTGGISATAPEWLALPEVR.C<br>R.TLGGQPEVSAESVAR.E<br>K.GVDEQSFIDFGEELYR.H<br>K.GVDEQSFIDFGEELYR.K<br>K.GAFHLAMQAGVPIVPIVHNATDVARK.N<br>K.LVEAYIAEVVASLDK.I<br>R.LLNATIPNVLR.E<br>R.LAGLIPDLTFQAYEISGR.H<br>K.KLVEAYIAEVVASLDK.I<br>K.IDVAGDDGPHR.S<br>K.AGGGQAQCGQANVSAGQTGAOK.F<br>R.VVGAIDWQDGAOK.A<br>R.GTAAPTATFTGPDAPVTLADFR.G<br>K.KALQYLDPENGLLDAANSALPTSIYDAEGR.E<br>R.IDAGLAALQSALLQ.R.A<br>R.ALASGYSTATDLADWLVR.E<br>R.LNESPLGAALAGTGFVDR.D<br>R.FGGGPAIMQENASIPDKR.L<br>R.AGLLGAFQR.L<br>R.LWEEDIAASR.A                                                                                                                                                                                                                                                                                                                                                                                                                                                                                                                                                                                                                                                                                                                                                                                                                                                                                                                                                                                                                                                                                                                                                                                                                                                                                                                                                                                                                                                                                                                                                                                                                                                                                                                                                                                                                                                                                                                                                                                     |
| YP_615249 | Sala_0192 | 2-dehydro-3-deoxyphosphogluconate aldolase/4-hydroxy-2-oxoglutarate aldolase | 53.88%            | 7                       | R.VPGVAVGAGTVLNPR.M<br>K.FFPAATSGGIPALK.A<br>K.RVPGAVVAGATVLNPR.M<br>R.TPALLDAIR.A<br>R.VEDAVPMAEALVAGGLR.V<br>R.CVGGSWVVPAGPLDVRIEALAK.E<br>K.ALAGPFGVNFCTGGISATAPEWLALPEVR.C<br>R.TLGGQPEVSAESVAR.E<br>K.GVDEQSFIDFGEELYR.H<br>K.GVDEQSFIDFGEELYR.K<br>K.GAFHLAMQAGVPIVPIVHNATDVARK.N<br>K.LVEAYIAEVVASLDK.I<br>R.LLNATIPNVLR.E<br>R.LAGLIPDLTFQAYEISGR.H<br>K.KLVEAYIAEVVASLDK.I<br>K.IDVAGDDGPHR.S<br>K.AGGGQAQCGQANVSAGQTGAOK.F<br>R.VVGAIDWQDGAOK.A<br>R.GTAAPTATFTGPDAPVTLADFR.G<br>K.KALQYLDPENGLLDAANSALPTSIYDAEGR.E<br>R.IDAGLAALQSALLQ.R.A<br>R.ALASGYSTATDLADWLVR.E<br>R.LNESPLGAALAGTGFVDR.D<br>R.FGGGPAIMQENASIPDKR.L<br>R.AGLLGAFQR.L<br>R.LWEEDIAASR.A                                                                                                                                                                                                                                                                                                                                                                                                                                                                                                                                                                                                                                                                                                                                                                                                                                                                                                                                                                                                                                                                                                                                                                                                                                                                                                                                                                                                                                                                                                                                                                                                                                                                                                                                                                                                                                                                                                                                                                                                                                                                                                                                                                                                                                                                                                                                                                                                                                                                                                                                                                                                                                                                                                                                                              |
| YP_615250 | Sala_0193 | HAD-superfamily subfamily 1B, PSpase-like protein                            | 11.39%            | 4                       | K.GVDEQSFIDFGEELYR.H<br>K.GVDEQSFIDFGEELYR.K<br>K.GAFHLAMQAGVPIVPIVHNATDVARK.N<br>K.LVEAYIAEVVASLDK.I<br>R.LLNATIPNVLR.E<br>R.LAGLIPDLTFQAYEISGR.H<br>K.KLVEAYIAEVVASLDK.I<br>K.IDVAGDDGPHR.S<br>K.AGGGQAQCGQANVSAGQTGAOK.F<br>R.VVGAIDWQDGAOK.A<br>R.GTAAPTATFTGPDAPVTLADFR.G<br>K.KALQYLDPENGLLDAANSALPTSIYDAEGR.E<br>R.IDAGLAALQSALLQ.R.A<br>R.ALASGYSTATDLADWLVR.E<br>R.LNESPLGAALAGTGFVDR.D<br>R.FGGGPAIMQENASIPDKR.L<br>R.AGLLGAFQR.L<br>R.LWEEDIAASR.A                                                                                                                                                                                                                                                                                                                                                                                                                                                                                                                                                                                                                                                                                                                                                                                                                                                                                                                                                                                                                                                                                                                                                                                                                                                                                                                                                                                                                                                                                                                                                                                                                                                                                                                                                                                                                                                                                                                                                                                                                                                                                                                                                                                                                                                                                                                                                                                                                                                                                                                                                                                                                                                                                                                                                                                                                                                                                                                                                                       |
| YP_615253 | Sala_0196 | Patatin                                                                      | 12.45%            | 5                       | K.LVEAYIAEVVASLDK.I<br>R.LLNATIPNVLR.E<br>R.LAGLIPDLTFQAYEISGR.H<br>K.KLVEAYIAEVVASLDK.I<br>K.IDVAGDDGPHR.S<br>K.AGGGQAQCGQANVSAGQTGAOK.F<br>R.VVGAIDWQDGAOK.A<br>R.GTAAPTATFTGPDAPVTLADFR.G<br>K.KALQYLDPENGLLDAANSALPTSIYDAEGR.E<br>R.IDAGLAALQSALLQ.R.A<br>R.ALASGYSTATDLADWLVR.E<br>R.LNESPLGAALAGTGFVDR.D<br>R.FGGGPAIMQENASIPDKR.L<br>R.AGLLGAFQR.L<br>R.LWEEDIAASR.A                                                                                                                                                                                                                                                                                                                                                                                                                                                                                                                                                                                                                                                                                                                                                                                                                                                                                                                                                                                                                                                                                                                                                                                                                                                                                                                                                                                                                                                                                                                                                                                                                                                                                                                                                                                                                                                                                                                                                                                                                                                                                                                                                                                                                                                                                                                                                                                                                                                                                                                                                                                                                                                                                                                                                                                                                                                                                                                                                                                                                                                         |
| YP_615257 | Sala_0200 | thioredoxin domain 2                                                         | 47.62%            | 4                       | K.LVEAYIAEVVASLDK.I<br>R.LLNATIPNVLR.E<br>R.LAGLIPDLTFQAYEISGR.H<br>K.KLVEAYIAEVVASLDK.I<br>K.IDVAGDDGPHR.S<br>K.AGGGQAQCGQANVSAGQTGAOK.F<br>R.VVGAIDWQDGAOK.A<br>R.GTAAPTATFTGPDAPVTLADFR.G<br>K.KALQYLDPENGLLDAANSALPTSIYDAEGR.E<br>R.IDAGLAALQSALLQ.R.A<br>R.ALASGYSTATDLADWLVR.E<br>R.LNESPLGAALAGTGFVDR.D<br>R.FGGGPAIMQENASIPDKR.L<br>R.AGLLGAFQR.L<br>R.LWEEDIAASR.A                                                                                                                                                                                                                                                                                                                                                                                                                                                                                                                                                                                                                                                                                                                                                                                                                                                                                                                                                                                                                                                                                                                                                                                                                                                                                                                                                                                                                                                                                                                                                                                                                                                                                                                                                                                                                                                                                                                                                                                                                                                                                                                                                                                                                                                                                                                                                                                                                                                                                                                                                                                                                                                                                                                                                                                                                                                                                                                                                                                                                                                         |
| YP_615258 | Sala_0201 | argininosuccinate lyase                                                      | 53.85%            | 15                      | R.IDAGLAALQSALLQ.R.A<br>R.ALASGYSTATDLADWLVR.E<br>R.LNESPLGAALAGTGFVDR.D<br>R.FGGGPAIMQENASIPDKR.L<br>R.AGLLGAFQR.L<br>R.LWEEDIAASR.A                                                                                                                                                                                                                                                                                                                                                                                                                                                                                                                                                                                                                                                                                                                                                                                                                                                                                                                                                                                                                                                                                                                                                                                                                                                                                                                                                                                                                                                                                                                                                                                                                                                                                                                                                                                                                                                                                                                                                                                                                                                                                                                                                                                                                                                                                                                                                                                                                                                                                                                                                                                                                                                                                                                                                                                                                                                                                                                                                                                                                                                                                                                                                                                                                                                                                               |

| Accession | Locus tag | Description                                            | Sequence coverage | No. peptides identified | List of peptides identified                                                                                                                                                                                                                                                                                                                                                                                                                                                                                                                                                                                                                                                                                                                                                                                                                                                                                                                                                                                                                                                                                                                                                                                                                                                                                                                                                                                                                                                                                                                                                                                                                                                                                                                                                                                                                                                                                                                                                                                                                                                                                                                                                                                                                                                                                                                                                                                                                                                                                                                                                                                                                                                                                                                                                                                                                                                                                                                                                                                                                                                                                                                                                                                                                                                                                                                                                                     |
|-----------|-----------|--------------------------------------------------------|-------------------|-------------------------|-------------------------------------------------------------------------------------------------------------------------------------------------------------------------------------------------------------------------------------------------------------------------------------------------------------------------------------------------------------------------------------------------------------------------------------------------------------------------------------------------------------------------------------------------------------------------------------------------------------------------------------------------------------------------------------------------------------------------------------------------------------------------------------------------------------------------------------------------------------------------------------------------------------------------------------------------------------------------------------------------------------------------------------------------------------------------------------------------------------------------------------------------------------------------------------------------------------------------------------------------------------------------------------------------------------------------------------------------------------------------------------------------------------------------------------------------------------------------------------------------------------------------------------------------------------------------------------------------------------------------------------------------------------------------------------------------------------------------------------------------------------------------------------------------------------------------------------------------------------------------------------------------------------------------------------------------------------------------------------------------------------------------------------------------------------------------------------------------------------------------------------------------------------------------------------------------------------------------------------------------------------------------------------------------------------------------------------------------------------------------------------------------------------------------------------------------------------------------------------------------------------------------------------------------------------------------------------------------------------------------------------------------------------------------------------------------------------------------------------------------------------------------------------------------------------------------------------------------------------------------------------------------------------------------------------------------------------------------------------------------------------------------------------------------------------------------------------------------------------------------------------------------------------------------------------------------------------------------------------------------------------------------------------------------------------------------------------------------------------------------------------------------|
|           |           |                                                        |                   |                         | R.SRNDQVATDFR.L<br>R.IISADDAAIIDR.G<br>R.LKELIGEPAGR.L<br>R.RAEELGVLPALPAADAAAIIAAVTPDVLAAITVEASVASR.M<br>R.NPDAELVLR.G<br>R.MSYGGTAPER.V<br>R.GLAQIAEEFAENGVPVDSLSDIHMHTVEAR.L<br>R.LAEFVIVASQPFQFVALPDAWSTGSSIMPQK.R<br>K.RNPDAAELVR.G<br>R.APTTQELTTPDAQAR.P<br>K.EDLKPANQPAPVPIGADR.A<br>R.APTTQELTTPDAQARPAR.S<br>K.FGVGIDSAPAIFDR.L<br>R.VNPDVDAGTHAK.I<br>R.GVALHIGSQTSLDPLEAAFER.V<br>R.GIGQFNIEHEPEGVVALSEIAVAK.E<br>R.QGYGADVVSSELEER.A<br>R.TAGAYGATMASTYNSR.S<br>R.SLVPVLDGDRYITVADR.I<br>R.HAQVFADALR.D<br>R.DREIDAVQPGALAVFR.T<br>K.TRAELAQGLDR.G<br>R.PALYDAWHDFVAVKPTGEK.M<br>R.DGVLHAEDIPLR.I<br>R.ALAAGMAAEDIVFSGVGK.T<br>K.AENKFGVGDSPAIFDR.L<br>R.IAAGTMAAERVDPWID.<br>R.VTKDWVDTLMFEPGR.V<br>R.AELAQGLDR.G<br>K.EIGTPVYVYSR.A<br>R.EIDAVQPGALAVFR.T<br>R.SLVPVLDGDR.Y<br>R.AAGHSITHVDLGGGLGVYRVEDNPPPTPAEYGMAR.V<br>K.HIAFAK.C<br>R.IISAWAEAGATFIALVGDAAAAR.A<br>R.APVTAIGTGGASAGLAK.A<br>R.TVVLVGEGEAAEAK.A<br>R.AIDAALPGGALDPLDAGAADR.V<br>R.LGDLAGALYAAAR.A<br>R.VGVEWLAAPDRPSR.L<br>R.QRLEALLPAR.L<br>K.VAAEALGSLYDQIR.H<br>R.ETQIFGISAQFQAVDR.A<br>R.ASQAALLDRPVLVIGER.G<br>R.WGDPKPIDALSFDPFASPWQPTVR.A<br>R.ANAASVAAAPPAASPSGPVSDLR.A<br>R.EGDIELVATYFQGR.M<br>R.AVEYGEITR.V<br>K.SLDEIEALQADKVADELAALK.A<br>R.LKAEIALLDALSQYEAIDIAK.L<br>K.DREDLATAALVEK.Q<br>R.DIIAANVTLLDRAEDPEK.M<br>R.TRDIIAANVTLLDRAEDPEK.M<br>R.RVDEAEGR.A<br>R.ADALGLGYK.K<br>K.LESLQDSWK.E<br>K.AEIAVLLDALSQYEAIDIAK.L<br>K.TLTGEDEQLLDELVDYDAR.R<br>R.SDEELAQLEINR.R<br>R.LLTDNKLAKLSQYSR.L<br>K.HGYPVENEWGGTVHR.T<br>K.AAQLADQIDR.L<br>R.QFQAISSSETAEK.A<br>R.IVTDKGDVADEIEK.L<br>K.AAQYAVHTER.L<br>R.DDGRHLFADSNAAITK.G<br>R.LHFLDASNAITK.G<br>R.VPVAIAIPALAHWDSLRL.E<br>K.VLTPDASASDASPLR.A<br>R.IGLPIVADR.V<br>R.DPFLVEEGYIFGR.G<br>R.IFFVAEAVR.S<br>K.GGHAENALPQR.A<br>K.ASDSFAHGLNER.V<br>R.NAEFALNGDGGGLIGEDGKPYYSLQAGEK.T<br>R.APGLPIIPMSAGATDSYHFR.M<br>R.VGGEIAGALK.T<br>R.PSPVNAIVQLADALVK.V<br>R.GKVELAAYAGVVK.A<br>K.DWTRDFLPVEEGYIFGR.G<br>R.FRPQVNELTR.I<br>K.TFAADPTDTK.A<br>K.QLKDIAIPTVK.G<br>K.VPELAAYAGVVK.A<br>K.TYADFTLEVNTAGGHSSRSPVNAIVQLADALVK.V<br>R.MNGVPSYVAGLFSK.A<br>R.GSEDNKFDIAMMVMATMAQLK.R<br>R.APGLPIIPMSAGATDSYHFR.M<br>K.TYADFTLEVNTAGGHSSR.P<br>K.ASDSFAHGLNERVVAIAIPALAHWDSLRL.E<br>R.GNHEEVGAELR.K<br>R.VTDTAQALFDVDDYKVFMAQIEAAVR.S<br>R.YPYDDIEHQEVTLR.G<br>R.GNPIEMAAQVWVR.V<br>R.WVLPWLR.K<br>R.ANNVSDKIK.V<br>R.RQQAEAVIAAR.K<br>R.GNHEEVGAELR.K<br>K.VVDLDER.K<br>R.SIGSRYPYDDIEHQEVTLR.G<br>R.DTQPVVNAGSLY.<br>R.ANNVSDK.I<br>.MVESGAPLNR.S<br>K.VNDLRGNPIEMAAQVWVR.V<br>K.LVEGAVTMVEMALQHLSDK.V<br>K.LVEGAVTMVEMALQHLSDK.K<br>R.TAIALNSVEQMAVILGTLR.A<br>R.AHAARPDVAADAER.R<br>R.AGGVAGLITNSATGEGQAAMIADTGAR.H<br>K.VIDEDGNELPQSGVEIVGR.S<br>R.LTWSDLRLTDR.I<br>R.GAPYGNVAVTILSTPLYSNTTMSFMPVTGSGGR.V<br>K.AMHWYDSEGQLFYR.H<br>R.VVEAAVVGMPSEEWGETPVAFVVLKPGADAESVR.E<br>R.IDEDGFLTMDR.A<br>R.HGIDGRIDEDGFLTMDR.A<br>R.LTQDETLDNSGAQLVLSASLADAAR.L<br>R.VNSSQWVPTHFVR.M<br>R.RIDFLEALPR.H<br>K.KFDPPEAALAHIER.Y<br>R.ISTHMLDGGIADVR.L<br>K.LLGFATHVSDPLAK.A<br>R.GIANNQAQYAAWGR.E<br>R.WGLVPDVAGMALWR.T<br>R.ELPVPVIAAHVAFGAGSQIMAAADR.I<br>R.DPGASSAGGGLAER.T<br>R.DLPVGLDGFETPGR.A<br>R.ETETSDDTPVITR.R<br>R.VGGNLSIVLEVPHEQVSSYGVIAFGAR.D<br>R.EAGIEQMIFVTR.G<br>K.GLVEKPPVAEAPSNLIISGR.Y<br>R.AFAIDLLK.<br>K.GAGGEQLTDAMTIGAQPFHAVTFAGAR.Y<br>R.GKQLSVLTPTR.L<br>K.EMPLVDRPLIQYAVDEAR.E<br>K.AVFPVAGLGR.F<br>K.AGYIQANLAVLERPDIADVR.A |
| YP_615259 | Sala_0202 | hypothetical protein                                   | 45.78%            | 3                       |                                                                                                                                                                                                                                                                                                                                                                                                                                                                                                                                                                                                                                                                                                                                                                                                                                                                                                                                                                                                                                                                                                                                                                                                                                                                                                                                                                                                                                                                                                                                                                                                                                                                                                                                                                                                                                                                                                                                                                                                                                                                                                                                                                                                                                                                                                                                                                                                                                                                                                                                                                                                                                                                                                                                                                                                                                                                                                                                                                                                                                                                                                                                                                                                                                                                                                                                                                                                 |
| YP_615260 | Sala_0203 | diaminopimelate decarboxylase                          | 71.36%            | 22                      |                                                                                                                                                                                                                                                                                                                                                                                                                                                                                                                                                                                                                                                                                                                                                                                                                                                                                                                                                                                                                                                                                                                                                                                                                                                                                                                                                                                                                                                                                                                                                                                                                                                                                                                                                                                                                                                                                                                                                                                                                                                                                                                                                                                                                                                                                                                                                                                                                                                                                                                                                                                                                                                                                                                                                                                                                                                                                                                                                                                                                                                                                                                                                                                                                                                                                                                                                                                                 |
| YP_615261 | Sala_0204 | siroheme synthase-like protein                         | 43.85%            | 7                       |                                                                                                                                                                                                                                                                                                                                                                                                                                                                                                                                                                                                                                                                                                                                                                                                                                                                                                                                                                                                                                                                                                                                                                                                                                                                                                                                                                                                                                                                                                                                                                                                                                                                                                                                                                                                                                                                                                                                                                                                                                                                                                                                                                                                                                                                                                                                                                                                                                                                                                                                                                                                                                                                                                                                                                                                                                                                                                                                                                                                                                                                                                                                                                                                                                                                                                                                                                                                 |
| YP_615262 | Sala_0205 | sigma54 specific transcriptional regulator, Fis family | 35.48%            | 7                       |                                                                                                                                                                                                                                                                                                                                                                                                                                                                                                                                                                                                                                                                                                                                                                                                                                                                                                                                                                                                                                                                                                                                                                                                                                                                                                                                                                                                                                                                                                                                                                                                                                                                                                                                                                                                                                                                                                                                                                                                                                                                                                                                                                                                                                                                                                                                                                                                                                                                                                                                                                                                                                                                                                                                                                                                                                                                                                                                                                                                                                                                                                                                                                                                                                                                                                                                                                                                 |
| YP_615264 | Sala_0207 | phage shock protein A, PspA                            | 53.18%            | 9                       |                                                                                                                                                                                                                                                                                                                                                                                                                                                                                                                                                                                                                                                                                                                                                                                                                                                                                                                                                                                                                                                                                                                                                                                                                                                                                                                                                                                                                                                                                                                                                                                                                                                                                                                                                                                                                                                                                                                                                                                                                                                                                                                                                                                                                                                                                                                                                                                                                                                                                                                                                                                                                                                                                                                                                                                                                                                                                                                                                                                                                                                                                                                                                                                                                                                                                                                                                                                                 |
| YP_615265 | Sala_0208 | phage shock B                                          | 34.07%            | 2                       |                                                                                                                                                                                                                                                                                                                                                                                                                                                                                                                                                                                                                                                                                                                                                                                                                                                                                                                                                                                                                                                                                                                                                                                                                                                                                                                                                                                                                                                                                                                                                                                                                                                                                                                                                                                                                                                                                                                                                                                                                                                                                                                                                                                                                                                                                                                                                                                                                                                                                                                                                                                                                                                                                                                                                                                                                                                                                                                                                                                                                                                                                                                                                                                                                                                                                                                                                                                                 |
| YP_615267 | Sala_0210 | hypothetical protein                                   | 40.40%            | 3                       |                                                                                                                                                                                                                                                                                                                                                                                                                                                                                                                                                                                                                                                                                                                                                                                                                                                                                                                                                                                                                                                                                                                                                                                                                                                                                                                                                                                                                                                                                                                                                                                                                                                                                                                                                                                                                                                                                                                                                                                                                                                                                                                                                                                                                                                                                                                                                                                                                                                                                                                                                                                                                                                                                                                                                                                                                                                                                                                                                                                                                                                                                                                                                                                                                                                                                                                                                                                                 |
| YP_615269 | Sala_0212 | hypothetical protein                                   | 42.53%            | 3                       |                                                                                                                                                                                                                                                                                                                                                                                                                                                                                                                                                                                                                                                                                                                                                                                                                                                                                                                                                                                                                                                                                                                                                                                                                                                                                                                                                                                                                                                                                                                                                                                                                                                                                                                                                                                                                                                                                                                                                                                                                                                                                                                                                                                                                                                                                                                                                                                                                                                                                                                                                                                                                                                                                                                                                                                                                                                                                                                                                                                                                                                                                                                                                                                                                                                                                                                                                                                                 |
| YP_615272 | Sala_0215 | Fe-S metabolism associated SufE                        | 12.50%            | 2                       |                                                                                                                                                                                                                                                                                                                                                                                                                                                                                                                                                                                                                                                                                                                                                                                                                                                                                                                                                                                                                                                                                                                                                                                                                                                                                                                                                                                                                                                                                                                                                                                                                                                                                                                                                                                                                                                                                                                                                                                                                                                                                                                                                                                                                                                                                                                                                                                                                                                                                                                                                                                                                                                                                                                                                                                                                                                                                                                                                                                                                                                                                                                                                                                                                                                                                                                                                                                                 |
| YP_615273 | Sala_0216 | peptidase M20                                          | 60.18%            | 23                      |                                                                                                                                                                                                                                                                                                                                                                                                                                                                                                                                                                                                                                                                                                                                                                                                                                                                                                                                                                                                                                                                                                                                                                                                                                                                                                                                                                                                                                                                                                                                                                                                                                                                                                                                                                                                                                                                                                                                                                                                                                                                                                                                                                                                                                                                                                                                                                                                                                                                                                                                                                                                                                                                                                                                                                                                                                                                                                                                                                                                                                                                                                                                                                                                                                                                                                                                                                                                 |
| YP_615274 | Sala_0217 | band 7 protein                                         | 52.00%            | 16                      |                                                                                                                                                                                                                                                                                                                                                                                                                                                                                                                                                                                                                                                                                                                                                                                                                                                                                                                                                                                                                                                                                                                                                                                                                                                                                                                                                                                                                                                                                                                                                                                                                                                                                                                                                                                                                                                                                                                                                                                                                                                                                                                                                                                                                                                                                                                                                                                                                                                                                                                                                                                                                                                                                                                                                                                                                                                                                                                                                                                                                                                                                                                                                                                                                                                                                                                                                                                                 |
| YP_615277 | Sala_0220 | AMP-dependent synthetase and ligase                    | 38.63%            | 10                      |                                                                                                                                                                                                                                                                                                                                                                                                                                                                                                                                                                                                                                                                                                                                                                                                                                                                                                                                                                                                                                                                                                                                                                                                                                                                                                                                                                                                                                                                                                                                                                                                                                                                                                                                                                                                                                                                                                                                                                                                                                                                                                                                                                                                                                                                                                                                                                                                                                                                                                                                                                                                                                                                                                                                                                                                                                                                                                                                                                                                                                                                                                                                                                                                                                                                                                                                                                                                 |
| YP_615278 | Sala_0221 | AMP-dependent synthetase and ligase                    | 12.94%            | 4                       |                                                                                                                                                                                                                                                                                                                                                                                                                                                                                                                                                                                                                                                                                                                                                                                                                                                                                                                                                                                                                                                                                                                                                                                                                                                                                                                                                                                                                                                                                                                                                                                                                                                                                                                                                                                                                                                                                                                                                                                                                                                                                                                                                                                                                                                                                                                                                                                                                                                                                                                                                                                                                                                                                                                                                                                                                                                                                                                                                                                                                                                                                                                                                                                                                                                                                                                                                                                                 |
| YP_615280 | Sala_0223 | Enoyl-CoA hydratase/isomerase                          | 37.08%            | 6                       |                                                                                                                                                                                                                                                                                                                                                                                                                                                                                                                                                                                                                                                                                                                                                                                                                                                                                                                                                                                                                                                                                                                                                                                                                                                                                                                                                                                                                                                                                                                                                                                                                                                                                                                                                                                                                                                                                                                                                                                                                                                                                                                                                                                                                                                                                                                                                                                                                                                                                                                                                                                                                                                                                                                                                                                                                                                                                                                                                                                                                                                                                                                                                                                                                                                                                                                                                                                                 |
| YP_615286 | Sala_0229 | hypothetical protein                                   | 10.78%            | 2                       |                                                                                                                                                                                                                                                                                                                                                                                                                                                                                                                                                                                                                                                                                                                                                                                                                                                                                                                                                                                                                                                                                                                                                                                                                                                                                                                                                                                                                                                                                                                                                                                                                                                                                                                                                                                                                                                                                                                                                                                                                                                                                                                                                                                                                                                                                                                                                                                                                                                                                                                                                                                                                                                                                                                                                                                                                                                                                                                                                                                                                                                                                                                                                                                                                                                                                                                                                                                                 |
| YP_615293 | Sala_0236 | UTP-glucose-1-phosphate uridylyltransferase            | 59.58%            | 10                      |                                                                                                                                                                                                                                                                                                                                                                                                                                                                                                                                                                                                                                                                                                                                                                                                                                                                                                                                                                                                                                                                                                                                                                                                                                                                                                                                                                                                                                                                                                                                                                                                                                                                                                                                                                                                                                                                                                                                                                                                                                                                                                                                                                                                                                                                                                                                                                                                                                                                                                                                                                                                                                                                                                                                                                                                                                                                                                                                                                                                                                                                                                                                                                                                                                                                                                                                                                                                 |



| Accession | Locus tag | Description                                     | Sequence coverage | No. peptides identified | List of peptides identified                                                                                                                                                                                                                                                                                                                                                                                                                                                                                                                                                                                                                                                                                                                                                                                                                                                                                                                                                                                                                                                                                                                                                                                                                                                                                                                                                                                                                                                                                                                                                                                                                                                                                                                                                                                                                                                                                                                                                                                                                                                                                                                                                                                                                                                                                                                                                                                                                                                                                                                                                                                                                                                                                                                                                                                                                                                                                                                                                                                                                                                                                                                                                                                                                                                                                                                                                                      |
|-----------|-----------|-------------------------------------------------|-------------------|-------------------------|--------------------------------------------------------------------------------------------------------------------------------------------------------------------------------------------------------------------------------------------------------------------------------------------------------------------------------------------------------------------------------------------------------------------------------------------------------------------------------------------------------------------------------------------------------------------------------------------------------------------------------------------------------------------------------------------------------------------------------------------------------------------------------------------------------------------------------------------------------------------------------------------------------------------------------------------------------------------------------------------------------------------------------------------------------------------------------------------------------------------------------------------------------------------------------------------------------------------------------------------------------------------------------------------------------------------------------------------------------------------------------------------------------------------------------------------------------------------------------------------------------------------------------------------------------------------------------------------------------------------------------------------------------------------------------------------------------------------------------------------------------------------------------------------------------------------------------------------------------------------------------------------------------------------------------------------------------------------------------------------------------------------------------------------------------------------------------------------------------------------------------------------------------------------------------------------------------------------------------------------------------------------------------------------------------------------------------------------------------------------------------------------------------------------------------------------------------------------------------------------------------------------------------------------------------------------------------------------------------------------------------------------------------------------------------------------------------------------------------------------------------------------------------------------------------------------------------------------------------------------------------------------------------------------------------------------------------------------------------------------------------------------------------------------------------------------------------------------------------------------------------------------------------------------------------------------------------------------------------------------------------------------------------------------------------------------------------------------------------------------------------------------------|
| YP_615319 | Sala_0263 | Protein of unknown function UPF0011             | 26.92%            | 6                       | R.FGDEVTLDLGRDVLVLMR.Q<br>R.FGDEVTLDLGR.D<br>R.EQEICAAAPALK.E<br>R.LAALAAALAEGLGNR.E<br>R.AAATLASADLIAEDTR.V<br>R.FLAFGLPNK.A<br>R.ASLVYFESGPR.L<br>R.ADTIAEFAGLR.A<br>R.DAMADKPVQAQAK.A<br>K.LLGLPLLEDAVAAPVPIR.G<br>R.LLATDFGGDGFIR.F<br>R.VALLVPQTGPNADVGTAIANATMALLDTR.T<br>R.VANAGDIDAVLIADSGGNAR.A<br>R.TGGPATPPPPSDPGETVGPGLPTDTR.H<br>R.ITTYDTALGAAAAAR.Q<br>R.ALEVSEIGAGGR.V<br>R.AAAEAGGTLVALESYDR.S<br>R.LASLGYDSSLVLR.I<br>R.RVANAGDIDAVLIADSGGNAR.A<br>R.QILGTWNTDAVLGSAAMR.G<br>R.GAWFASVSDGLYGLATK.Y<br>R.SAIALTGAAR.R<br>R.VIDPAPTKW.<br>R.DWKPGTNFVNR.L<br>K.IPVLSFNSDSSVAGNVFIMGFVPGQSVR.I<br>R.QAVADGNKLLGLPSEDVAAPVPIR.G<br>R.GLGAVALAGVLAACQVVR.T<br>R.FGALVPK.N<br>K.VFDLFEEDKVK.M<br>R.YNEFIASPK.V<br>R.VAELTAEVAK.V<br>R.EMSHQLGLNLQR.V<br>R.VAELTAEVAKVEAHPR.T<br>K.MRPNIIDHDFVK.M<br>R.GREMSHTQLGLNLQR.V<br>K.YKVEAQK.K<br>K.TQEIKEIK.M<br>R.FADPAVADLDRFNALFADIGSGPR.L<br>R.SDPEGLDITLAEAGPALFTIGEVYVTR.A<br>R.ATLAAVLGSR.S<br>R.ASTLAVAADGTVR.M<br>R.DLQAGGTWLVGHAPSGR.A<br>R.INAGEEPDQDVTGWLRA<br>K.GLDEWVATAR.R<br>R.FAALVQGFNDVELAPK.K<br>R.VFALLGGVR.T<br>K.QDVLGVELELR.D<br>K.GYLSTSVSDILSR.S<br>R.ELMAANFTNWSTAIR.C<br>R.FTGLSETWLEQADLR.V<br>K.ASASSVEFAFEAR.Q<br>R.INYAATIGETIR.N<br>K.DYVGVTDK.L<br>K.VLGGESYGTTR.T<br>R.TDREYQSIGGGQWDRW.I<br>R.QWAIQYATALLK.G<br>R.FDNLNPHQYTPDSLQTYR.S<br>R.IFGLPDLTMQEAQK.I<br>R.SYSENPVPSFRPSPGSR.M<br>K.SKAPPTQTSASPTTSSLPMVDLNNVQLPQLR.Q<br>K.APTTQTSASPTTSSLPMVDLNNVQLPQLR.Q<br>R.SRDDFIR.F<br>R.LKTALEDFR.S<br>R.FLDYLGEK.G<br>K.VLAVLSDDEADVNTLDDHVMGR.F<br>K.IANVLAHASP.E<br>K.IJLAQYGEFK.S<br>R.IYANSHYVTPGTLK.Q<br>R.VSFFGDEIEIEITFDPLTKK.K<br>R.VSFFGDEIEIEITFDPLTKK.I<br>R.IGERDQVLLGVTSKGT<br>R.NIGDIAHVASK.D<br>R.SETSLVQTIGR.A<br>R.FELVSDYEPAGDQPTAIR.E<br>R.YMHSDEVETLER.I<br>R.SDITYEKESSVNEAIDR.M<br>R.PQITISVATPTGWEKER.T<br>R.LFGEPPPTLFYLPDNLVDFVDESHQTIPIQIGMSK.G<br>R.LGVDFVLVGINLLR.E<br>R.DAAADLEFEAAGR.L<br>K.RNDQAFAR.G<br>K.AYNEAHGITPTTIK.R<br>R.SEDFPAVDVYPR.V<br>R.LDHFDTRETTAVPEPIAQLAGDYGIVR.D<br>R.RFDLLELAHTAGGAAPR.P<br>K.AYAJATEALGR.S<br>R.GEQAQQAAILDR.M<br>R.DAVPEPILLSAPDSGNLPESR.A<br>R.AIWSQQLR.L<br>K.ADRDPVALAALSIVR.F<br>R.SLADPSNPNVPAVTLAFILSQR.G<br>R.FLITPAVIAR.A<br>R.FGDWQPQR.G<br>R.ALNPDYDADMAGFLGLK.L<br>K.DAIDYIEANKG.<br>K.IVEHLGVEADK.V<br>K.KIVVEHLGVEADK.V<br>R.AALNNSFGFGGTNASLIVK.A<br>R.VVVTGLGLVPLGGDVSWSK.N<br>R.DQIVPPTLNLDPDEGTGADLVPK.V<br>R.QVDPFIIYGIDAAGQALEDAGLTELTEEQVR.A<br>R.QVDPFIIYGIDAAGQALEDAGLTELTEEQV.V<br>R.LNLSISQVSIK.Y<br>K.IYAEVYGLSGDAYHTAPDPEMDGAFR.S<br>R.DRDGFVMGEGAVVLEEYEHAK.A<br>R.DGFVMGEGAVVLEEYEHAK.A<br>R.LFGDAMANVMSSTK.S<br>K.AGMTPADIDYINAHGTSTMDTIELGAVK.R<br>R.RVVVTGLGLVPLGGDVSWSK.N<br>K.SGAGPITKFDASDQK.C<br>R.FNDRPEQASR.P<br>R.AGCSIGSGIGGLPIESESLLLAEGKGR.V<br>R.AGCSIGSGIGGLPIESESLLLAEGK.G<br>K.GPNHAVVTACSTGAHSGDAAR.M<br>K.SAIGHLLGGAVETIFCILAIR.D<br>K.IYAEVYGLSGDAYHTAPDPEMDGAFR.S<br>K.AGMTPADIDYINAHGTSTMDTIELGAVK.L<br>R.NILGLAFDSSGR.L<br>R.VQEIASFDEPWAMTFLPGTR.A<br>R.LEGLEVIWK.Q<br>R.VLFISSGER.Q<br>R.HGDEVNLLVEAK.A<br>R.LNPDGSPADNPFAGEGGVTAQIWSLGH.R.N<br>R.QKFDPAQDMTGNLGI.I<br>R.EDGTVLLTDGDDGR.L<br>K.NSLLMGALSSEGLVQMR.I<br>K.LWVNPVAVSAGLAYGGDLYPGWK.N<br>K.ANYGYPVNSGDHYDGR.D<br>R.LWNQEMGPR.H<br>K.FVGEYDETAVER.T<br>R.TISTPASQESGEMADVQR.G<br>K.ALLAGVPHLR.A<br>R.NKRVGEYDETAVER.T<br>K.RADAPPASEAVDAIMDSVEEIAAR.R<br>R.STDEQPSHEAFRA<br>K.FTAEYDELAER.L<br>R.LLVAPDDQDSSLHADVQR.A |
| YP_615320 | Sala_0264 | Extracellular ligand-binding receptor           | 81.22%            | 19                      |                                                                                                                                                                                                                                                                                                                                                                                                                                                                                                                                                                                                                                                                                                                                                                                                                                                                                                                                                                                                                                                                                                                                                                                                                                                                                                                                                                                                                                                                                                                                                                                                                                                                                                                                                                                                                                                                                                                                                                                                                                                                                                                                                                                                                                                                                                                                                                                                                                                                                                                                                                                                                                                                                                                                                                                                                                                                                                                                                                                                                                                                                                                                                                                                                                                                                                                                                                                                  |
| YP_615321 | Sala_0265 | translation initiation factor IF-3              | 46.82%            | 9                       |                                                                                                                                                                                                                                                                                                                                                                                                                                                                                                                                                                                                                                                                                                                                                                                                                                                                                                                                                                                                                                                                                                                                                                                                                                                                                                                                                                                                                                                                                                                                                                                                                                                                                                                                                                                                                                                                                                                                                                                                                                                                                                                                                                                                                                                                                                                                                                                                                                                                                                                                                                                                                                                                                                                                                                                                                                                                                                                                                                                                                                                                                                                                                                                                                                                                                                                                                                                                  |
| YP_615322 | Sala_0266 | protein of unknown function DUF833              | 40.95%            | 5                       |                                                                                                                                                                                                                                                                                                                                                                                                                                                                                                                                                                                                                                                                                                                                                                                                                                                                                                                                                                                                                                                                                                                                                                                                                                                                                                                                                                                                                                                                                                                                                                                                                                                                                                                                                                                                                                                                                                                                                                                                                                                                                                                                                                                                                                                                                                                                                                                                                                                                                                                                                                                                                                                                                                                                                                                                                                                                                                                                                                                                                                                                                                                                                                                                                                                                                                                                                                                                  |
| YP_615323 | Sala_0267 | hypothetical protein                            | 23.37%            | 3                       |                                                                                                                                                                                                                                                                                                                                                                                                                                                                                                                                                                                                                                                                                                                                                                                                                                                                                                                                                                                                                                                                                                                                                                                                                                                                                                                                                                                                                                                                                                                                                                                                                                                                                                                                                                                                                                                                                                                                                                                                                                                                                                                                                                                                                                                                                                                                                                                                                                                                                                                                                                                                                                                                                                                                                                                                                                                                                                                                                                                                                                                                                                                                                                                                                                                                                                                                                                                                  |
| YP_615324 | Sala_0268 | transcriptional regulator, TetR family          | 24.75%            | 4                       |                                                                                                                                                                                                                                                                                                                                                                                                                                                                                                                                                                                                                                                                                                                                                                                                                                                                                                                                                                                                                                                                                                                                                                                                                                                                                                                                                                                                                                                                                                                                                                                                                                                                                                                                                                                                                                                                                                                                                                                                                                                                                                                                                                                                                                                                                                                                                                                                                                                                                                                                                                                                                                                                                                                                                                                                                                                                                                                                                                                                                                                                                                                                                                                                                                                                                                                                                                                                  |
| YP_615326 | Sala_0270 | peptidase S10, serine carboxypeptidase          | 18.80%            | 7                       |                                                                                                                                                                                                                                                                                                                                                                                                                                                                                                                                                                                                                                                                                                                                                                                                                                                                                                                                                                                                                                                                                                                                                                                                                                                                                                                                                                                                                                                                                                                                                                                                                                                                                                                                                                                                                                                                                                                                                                                                                                                                                                                                                                                                                                                                                                                                                                                                                                                                                                                                                                                                                                                                                                                                                                                                                                                                                                                                                                                                                                                                                                                                                                                                                                                                                                                                                                                                  |
| YP_615330 | Sala_0274 | hypothetical protein                            | 70.10%            | 10                      |                                                                                                                                                                                                                                                                                                                                                                                                                                                                                                                                                                                                                                                                                                                                                                                                                                                                                                                                                                                                                                                                                                                                                                                                                                                                                                                                                                                                                                                                                                                                                                                                                                                                                                                                                                                                                                                                                                                                                                                                                                                                                                                                                                                                                                                                                                                                                                                                                                                                                                                                                                                                                                                                                                                                                                                                                                                                                                                                                                                                                                                                                                                                                                                                                                                                                                                                                                                                  |
| YP_615331 | Sala_0275 | excinuclease ABC, B subunit                     | 32.14%            | 16                      |                                                                                                                                                                                                                                                                                                                                                                                                                                                                                                                                                                                                                                                                                                                                                                                                                                                                                                                                                                                                                                                                                                                                                                                                                                                                                                                                                                                                                                                                                                                                                                                                                                                                                                                                                                                                                                                                                                                                                                                                                                                                                                                                                                                                                                                                                                                                                                                                                                                                                                                                                                                                                                                                                                                                                                                                                                                                                                                                                                                                                                                                                                                                                                                                                                                                                                                                                                                                  |
| YP_615335 | Sala_0279 | Tetratricopeptide TPR_4                         | 32.19%            | 12                      |                                                                                                                                                                                                                                                                                                                                                                                                                                                                                                                                                                                                                                                                                                                                                                                                                                                                                                                                                                                                                                                                                                                                                                                                                                                                                                                                                                                                                                                                                                                                                                                                                                                                                                                                                                                                                                                                                                                                                                                                                                                                                                                                                                                                                                                                                                                                                                                                                                                                                                                                                                                                                                                                                                                                                                                                                                                                                                                                                                                                                                                                                                                                                                                                                                                                                                                                                                                                  |
| YP_615336 | Sala_0280 | acyl carrier protein                            | 30.77%            | 3                       |                                                                                                                                                                                                                                                                                                                                                                                                                                                                                                                                                                                                                                                                                                                                                                                                                                                                                                                                                                                                                                                                                                                                                                                                                                                                                                                                                                                                                                                                                                                                                                                                                                                                                                                                                                                                                                                                                                                                                                                                                                                                                                                                                                                                                                                                                                                                                                                                                                                                                                                                                                                                                                                                                                                                                                                                                                                                                                                                                                                                                                                                                                                                                                                                                                                                                                                                                                                                  |
| YP_615337 | Sala_0281 | beta-ketoacyl synthase                          | 73.03%            | 20                      |                                                                                                                                                                                                                                                                                                                                                                                                                                                                                                                                                                                                                                                                                                                                                                                                                                                                                                                                                                                                                                                                                                                                                                                                                                                                                                                                                                                                                                                                                                                                                                                                                                                                                                                                                                                                                                                                                                                                                                                                                                                                                                                                                                                                                                                                                                                                                                                                                                                                                                                                                                                                                                                                                                                                                                                                                                                                                                                                                                                                                                                                                                                                                                                                                                                                                                                                                                                                  |
| YP_615339 | Sala_0283 | glucose sorbosone dehydrogenase                 | 49.60%            | 12                      |                                                                                                                                                                                                                                                                                                                                                                                                                                                                                                                                                                                                                                                                                                                                                                                                                                                                                                                                                                                                                                                                                                                                                                                                                                                                                                                                                                                                                                                                                                                                                                                                                                                                                                                                                                                                                                                                                                                                                                                                                                                                                                                                                                                                                                                                                                                                                                                                                                                                                                                                                                                                                                                                                                                                                                                                                                                                                                                                                                                                                                                                                                                                                                                                                                                                                                                                                                                                  |
| YP_615340 | Sala_0284 | RNA polymerase, sigma-24 subunit, ECF subfamily | 32.23%            | 5                       |                                                                                                                                                                                                                                                                                                                                                                                                                                                                                                                                                                                                                                                                                                                                                                                                                                                                                                                                                                                                                                                                                                                                                                                                                                                                                                                                                                                                                                                                                                                                                                                                                                                                                                                                                                                                                                                                                                                                                                                                                                                                                                                                                                                                                                                                                                                                                                                                                                                                                                                                                                                                                                                                                                                                                                                                                                                                                                                                                                                                                                                                                                                                                                                                                                                                                                                                                                                                  |
| YP_615342 | Sala_0286 | RNA polymerase, sigma-24 subunit, ECF subfamily | 26.54%            | 6                       |                                                                                                                                                                                                                                                                                                                                                                                                                                                                                                                                                                                                                                                                                                                                                                                                                                                                                                                                                                                                                                                                                                                                                                                                                                                                                                                                                                                                                                                                                                                                                                                                                                                                                                                                                                                                                                                                                                                                                                                                                                                                                                                                                                                                                                                                                                                                                                                                                                                                                                                                                                                                                                                                                                                                                                                                                                                                                                                                                                                                                                                                                                                                                                                                                                                                                                                                                                                                  |

| Accession | Locus tag | Description                                     | Sequence coverage | No. peptides identified | List of peptides identified                                                                                                                                                                                                                                                                                                                                                                                                                                                                                                                                                                                                                                                                                                                                                                                                                                                                                                                                                                                                                                                                                                                                                                                                                                                                                                                                                                                                                                                                                                                                                                                                                                                                                                                                                                                                                                                                                                                                                                                                                                                                                                                                                                                                      |
|-----------|-----------|-------------------------------------------------|-------------------|-------------------------|----------------------------------------------------------------------------------------------------------------------------------------------------------------------------------------------------------------------------------------------------------------------------------------------------------------------------------------------------------------------------------------------------------------------------------------------------------------------------------------------------------------------------------------------------------------------------------------------------------------------------------------------------------------------------------------------------------------------------------------------------------------------------------------------------------------------------------------------------------------------------------------------------------------------------------------------------------------------------------------------------------------------------------------------------------------------------------------------------------------------------------------------------------------------------------------------------------------------------------------------------------------------------------------------------------------------------------------------------------------------------------------------------------------------------------------------------------------------------------------------------------------------------------------------------------------------------------------------------------------------------------------------------------------------------------------------------------------------------------------------------------------------------------------------------------------------------------------------------------------------------------------------------------------------------------------------------------------------------------------------------------------------------------------------------------------------------------------------------------------------------------------------------------------------------------------------------------------------------------|
| YP_615343 | Sala_0287 | RNA polymerase, sigma-24 subunit, ECF subfamily | 42.42%            | 7                       | R.RSTDEQPSHEAFR.A<br>R.KKFTAYDELAER.L<br>R.ALLMLPVQQR.E<br>R.APVPAIFTTAFPER.L<br>R.IWESAYDDGEGSDDAENPLVR.A<br>R.ALTGSQQHGDNFVHALLEVVAAPDEF.R.S<br>R.VEFTLISKPF.R.E<br>R.TSVLLIEDEPLIAMLEQIVR.S<br>R.TSVLLIEDEPLIAMLEQIVR.S<br>R.AAISQSLTTPQLAA                                                                                                                                                                                                                                                                                                                                                                                                                                                                                                                                                                                                                                                                                                                                                                                                                                                                                                                                                                                                                                                                                                                                                                                                                                                                                                                                                                                                                                                                                                                                                                                                                                                                                                                                                                                                                                                                                                                                                                                   |
| YP_615344 | Sala_0288 | signal transduction histidine kinase            | 19.65%            | 7                       | R.WTQDDEGADRRR.F<br>R.AQNVLDFGSGIATWR.Y<br>R.MLEQALDFSGIATWR.Y<br>R.LTWAESGADREITPPER.T<br>R.FQDNPLVTGEPYI.R.F<br>R.EYHLLDTGAEAFDR.V<br>K.HGALSGER.G                                                                                                                                                                                                                                                                                                                                                                                                                                                                                                                                                                                                                                                                                                                                                                                                                                                                                                                                                                                                                                                                                                                                                                                                                                                                                                                                                                                                                                                                                                                                                                                                                                                                                                                                                                                                                                                                                                                                                                                                                                                                             |
| YP_615347 | Sala_0291 | Superoxide dismutase                            | 100.00%           | 19                      | K.TEPAGDLLAIAER.D<br>K.AYVDKNAAIETELADK.S<br>K.DTAVNHFASGWAWLIAR.D<br>K.VNAAIETELADK.S<br>K.GLFVNSAQSWNHAFYWNLSNPTK.T<br>R.DFGSLGELK.K<br>K.SLEEIHHAEVGSNGK.G<br>K.NLRPAYDAVDDELLNWDFAENYAR.E<br>K.TEPAGDLLAIAIERDFGSLGELK.K<br>R.DGTLSDTHDAGTELVAQIK.P<br>R.DFGSLGELK.K<br>K.VNAAIETELADK.SLEEIHHAEVGSNGK.G<br>K.LKDTAVNHFASGWAWLIAR.D<br>R.DGTLSDTHDAGTELVAQIKPLLVIVWEHAYYIDR.K<br>R.PAYVDAVDDELLNWDFAENYAR.E<br>R.KNLRPAYDAVDDELLNWDFAENYAR.E<br>K.PLVIVWEHAYYIDR.K<br>K.GLFVNSAQSWNHAFYWNLSNPTKTEPAGDLLAIAER.D<br>K.PLVIVWEHAYYIDR.K<br>K.VVTAPTNGAAGIIPAVI.R.Y<br>K.GHAADTAIVAGLAGEIPASTLSLAIK.A<br>R.TFLLAAGAVGALYK.R<br>R.AASEGFYLLGR.Q<br>R.GAEDEVELPAFTSGDLLAMGAVSGK.S<br>R.SYRGDAAGVR.T<br>K.IGVGSSSHTVGPVMAAR.R<br>R.QPFHSNAVSTFAR.D<br>R.DGDGEILAK.R<br>K.IGVGSSSHTVGPVMAAR.R<br>R.VGVVAAAGTIASK.L<br>K.HGAVQTTNR.D                                                                                                                                                                                                                                                                                                                                                                                                                                                                                                                                                                                                                                                                                                                                                                                                                                                                                                                                                                                                                                                                                                                                                                                                                                                                                                                                                                                                  |
| YP_615348 | Sala_0292 | L-serine dehydratase 1                          | 32.03%            | 10                      | R.ATGAEDLLAVIR.R<br>R.RIAGQVAVEK.A<br>R.IAGQVAVEK.A<br>K.AAYDAEAAFVDTIVANAGVATEK.M<br>R.VALLTGSSELGAGFAK.A<br>K.RLDQAGSR.E<br>R.IVLIGSITAEK.V<br>R.AGLVSEIVGEEALLDR.G<br>R.LNALNEELVDENAYFGGLVERPDVR.V<br>R.LVGSASLAEMILTGR.F<br>R.VPGSEVSVGVGDDSPGALFSPSLTISR.Q<br>R.QDWAYGSELLAQK.V<br>R.EAVGRLLDAR.G<br>R.LWDAADLADGDDALAAALR.F<br>R.FAQDAVELAVR.Q<br>R.IVPLDGGALVASR.L<br>R.HLAYAETADWLAA.R.G<br>R.QQVLLPVPVR.D<br>R.NFFADGGATDLSGNR.V<br>R.GGTGALFGNGQPGLTVNFVQK.E<br>R.QFGNIDPGTVLAGPETR.L<br>K.ASGTLENNDFGVWGDGPDPTYDNGTAVLNGTFR.N<br>R.LNLVLANGQVATDR.G<br>R.GSLVVAR.Y<br>R.GFTQGSFFVNAAYDGR.E<br>R.TDLLSLYATLFHTR.F<br>R.GLATTVITNGAPIASIGGAR.S<br>R.GADLVNLGTNFDYIEIGDLQLR.Y<br>R.FSDIATNQLSNYFK.I<br>R.GNTNPFDDNLR.D<br>K.VIPGVSAESSGQNGANIFVR.G<br>K.ASITDFGDLR.G<br>R.QDAAFVTSINAEIAR.A<br>R.GNTNPFDDNLRDGFVSPR.V<br>K.QIEDFNDLAVWDGSGNKK.F<br>R.QLGAGSQVVAR.P<br>R.KQIEEDFNDLAVWDGSGNKK.F<br>R.EYAFYVDEFQVTELR.L<br>K.EGGRDFEGLV.A<br>R.YLNDRGQWLLPVPVR.D<br>R.VTPAYDIPFGNDGK.V<br>R.GDMLLSGPLGESTSFMIGYVYASNGNIR.D<br>R.AAPNSTADL.K<br>K.VSLYSTFTYVGRDSTANTQSLPNYFK.I<br>K.VSLYSTFTYVGRD.F<br>K.GSWSWTVGANYDISSVGVAR.Y<br>R.FWNLALAR.T<br>K.IFLNLAAPK.T<br>R.NVGVQVLIASDYPMQSLAK.T<br>K.IHPHTQGFDAADPR.V<br>R.NDALIALGK.K<br>K.HAGASGLVLLDNASIVPADNEK.L<br>K.TLEAFDKLDTEEER.A<br>K.HAGASGLVLLDNASIVPADNEKLFNLALAAAPK.T<br>R.AGNPADISAR.N<br>R.VDELAGLASAGIAR.V<br>R.RLTDAGTISLTHAIEAVSR.R<br>R.AMGVADDAEGDQAAVAR.L<br>K.QLGVEVLETLGSRPLVITDPWLLNSGR.V<br>R.ESSLFVLDQSGAAVVAR.P<br>K.LAGVAFDFVHLLDR.G<br>R.QEVSVAQVPSNR.N<br>K.SREDNAALTAR.R<br>K.NTFGAIVAVK.S<br>K.FLVGDQVPIITTEQLGDNFENAFR.T<br>R.EEVIKLEVTIPVINGAGEVK.M<br>R.VQPIDGAAAPQGR.I<br>R.IPLSDIPIGELFK.S<br>R.IGSGGAQVQVTEIR.L<br>R.APVAIVPIDSNAIARL.G<br>K.NIPVATSYSNASPNILTLGGAYSTR.I<br>K.LEVTPQVINGAGEVK.M<br>K.AFDVWLSLGDGAPGGTDENADIRGDS.<br>R.LDNLVYPTSDGLNALVTAPPALAQPER.Y<br>R.EALLTLAAPPDLLSGAWKPK.R<br>R.TDGLTTLAAPR.V<br>R.ASLSPALLTGATLAFER.S<br>R.LGALPLGTVR.A<br>R.AAPGGVVLATSGRF.<br>R.GSWSELVDAR.L<br>R.AEALASQSGMER.L<br>R.VQLMVAAPJAGLDSR.G<br>R.LGALPLGTVRASLPLALLTGATLAFER.S<br>R.LALGWSGADGAGVSR.T<br>K.ERPAAIGSNEEWAQNR.R<br>R.DYVALGER.R<br>R.VTLEGHADER.G<br>K.NYLASLIDPISR.I<br>K.KAPDTPPAPEGAGTDDTTDTGTGVVPGSQEDFVANVASDR.I |
| YP_615350 | Sala_0294 | glucose-methanol-choline oxidoreductase         | 3.60%             | 2                       |                                                                                                                                                                                                                                                                                                                                                                                                                                                                                                                                                                                                                                                                                                                                                                                                                                                                                                                                                                                                                                                                                                                                                                                                                                                                                                                                                                                                                                                                                                                                                                                                                                                                                                                                                                                                                                                                                                                                                                                                                                                                                                                                                                                                                                  |
| YP_615352 | Sala_0296 | protein of unknown function DUF156              | 25.56%            | 3                       |                                                                                                                                                                                                                                                                                                                                                                                                                                                                                                                                                                                                                                                                                                                                                                                                                                                                                                                                                                                                                                                                                                                                                                                                                                                                                                                                                                                                                                                                                                                                                                                                                                                                                                                                                                                                                                                                                                                                                                                                                                                                                                                                                                                                                                  |
| YP_615353 | Sala_0297 | short-chain dehydrogenase/reductase SDR         | 24.03%            | 4                       |                                                                                                                                                                                                                                                                                                                                                                                                                                                                                                                                                                                                                                                                                                                                                                                                                                                                                                                                                                                                                                                                                                                                                                                                                                                                                                                                                                                                                                                                                                                                                                                                                                                                                                                                                                                                                                                                                                                                                                                                                                                                                                                                                                                                                                  |
| YP_615354 | Sala_0298 | Enoyl-CoA hydratase/isomerase                   | 21.76%            | 3                       |                                                                                                                                                                                                                                                                                                                                                                                                                                                                                                                                                                                                                                                                                                                                                                                                                                                                                                                                                                                                                                                                                                                                                                                                                                                                                                                                                                                                                                                                                                                                                                                                                                                                                                                                                                                                                                                                                                                                                                                                                                                                                                                                                                                                                                  |
| YP_615359 | Sala_0303 | transcriptional regulator, LacI family          | 14.93%            | 3                       |                                                                                                                                                                                                                                                                                                                                                                                                                                                                                                                                                                                                                                                                                                                                                                                                                                                                                                                                                                                                                                                                                                                                                                                                                                                                                                                                                                                                                                                                                                                                                                                                                                                                                                                                                                                                                                                                                                                                                                                                                                                                                                                                                                                                                                  |
| YP_615360 | Sala_0304 | beta-phosphoglucomutase                         | 5.98%             | 4                       |                                                                                                                                                                                                                                                                                                                                                                                                                                                                                                                                                                                                                                                                                                                                                                                                                                                                                                                                                                                                                                                                                                                                                                                                                                                                                                                                                                                                                                                                                                                                                                                                                                                                                                                                                                                                                                                                                                                                                                                                                                                                                                                                                                                                                                  |
| YP_615361 | Sala_0305 | TonB-dependent receptor                         | 54.71%            | 29                      |                                                                                                                                                                                                                                                                                                                                                                                                                                                                                                                                                                                                                                                                                                                                                                                                                                                                                                                                                                                                                                                                                                                                                                                                                                                                                                                                                                                                                                                                                                                                                                                                                                                                                                                                                                                                                                                                                                                                                                                                                                                                                                                                                                                                                                  |
| YP_615363 | Sala_0307 | amidohydrolase 2                                | 39.43%            | 9                       |                                                                                                                                                                                                                                                                                                                                                                                                                                                                                                                                                                                                                                                                                                                                                                                                                                                                                                                                                                                                                                                                                                                                                                                                                                                                                                                                                                                                                                                                                                                                                                                                                                                                                                                                                                                                                                                                                                                                                                                                                                                                                                                                                                                                                                  |
| YP_615364 | Sala_0308 | iron-containing alcohol dehydrogenase           | 20.88%            | 4                       |                                                                                                                                                                                                                                                                                                                                                                                                                                                                                                                                                                                                                                                                                                                                                                                                                                                                                                                                                                                                                                                                                                                                                                                                                                                                                                                                                                                                                                                                                                                                                                                                                                                                                                                                                                                                                                                                                                                                                                                                                                                                                                                                                                                                                                  |
| YP_615370 | Sala_0314 | type II secretion system protein C              | 9.72%             | 2                       |                                                                                                                                                                                                                                                                                                                                                                                                                                                                                                                                                                                                                                                                                                                                                                                                                                                                                                                                                                                                                                                                                                                                                                                                                                                                                                                                                                                                                                                                                                                                                                                                                                                                                                                                                                                                                                                                                                                                                                                                                                                                                                                                                                                                                                  |
| YP_615371 | Sala_0315 | type II and III secretion system protein        | 23.09%            | 11                      |                                                                                                                                                                                                                                                                                                                                                                                                                                                                                                                                                                                                                                                                                                                                                                                                                                                                                                                                                                                                                                                                                                                                                                                                                                                                                                                                                                                                                                                                                                                                                                                                                                                                                                                                                                                                                                                                                                                                                                                                                                                                                                                                                                                                                                  |
| YP_615374 | Sala_0318 | General secretion pathway protein G             | 33.13%            | 2                       |                                                                                                                                                                                                                                                                                                                                                                                                                                                                                                                                                                                                                                                                                                                                                                                                                                                                                                                                                                                                                                                                                                                                                                                                                                                                                                                                                                                                                                                                                                                                                                                                                                                                                                                                                                                                                                                                                                                                                                                                                                                                                                                                                                                                                                  |
| YP_615379 | Sala_0323 | General secretion pathway L                     | 9.28%             | 2                       |                                                                                                                                                                                                                                                                                                                                                                                                                                                                                                                                                                                                                                                                                                                                                                                                                                                                                                                                                                                                                                                                                                                                                                                                                                                                                                                                                                                                                                                                                                                                                                                                                                                                                                                                                                                                                                                                                                                                                                                                                                                                                                                                                                                                                                  |
| YP_615381 | Sala_0325 | type II secretion system protein N              | 42.02%            | 8                       |                                                                                                                                                                                                                                                                                                                                                                                                                                                                                                                                                                                                                                                                                                                                                                                                                                                                                                                                                                                                                                                                                                                                                                                                                                                                                                                                                                                                                                                                                                                                                                                                                                                                                                                                                                                                                                                                                                                                                                                                                                                                                                                                                                                                                                  |
| YP_615383 | Sala_0327 | OmpA/MotB                                       | 80.59%            | 13                      |                                                                                                                                                                                                                                                                                                                                                                                                                                                                                                                                                                                                                                                                                                                                                                                                                                                                                                                                                                                                                                                                                                                                                                                                                                                                                                                                                                                                                                                                                                                                                                                                                                                                                                                                                                                                                                                                                                                                                                                                                                                                                                                                                                                                                                  |

| Accession | Locus tag | Description                                                | Sequence coverage | No. peptides identified | List of peptides identified                                                                                                                                                                                                                                                                                                                                                                                                                                                                                                                                                                                                                                                                                                                                                                                                                                                                                                                                                                                                                                                                                                                                                                                                                                                                                                                                                                                                                                               |
|-----------|-----------|------------------------------------------------------------|-------------------|-------------------------|---------------------------------------------------------------------------------------------------------------------------------------------------------------------------------------------------------------------------------------------------------------------------------------------------------------------------------------------------------------------------------------------------------------------------------------------------------------------------------------------------------------------------------------------------------------------------------------------------------------------------------------------------------------------------------------------------------------------------------------------------------------------------------------------------------------------------------------------------------------------------------------------------------------------------------------------------------------------------------------------------------------------------------------------------------------------------------------------------------------------------------------------------------------------------------------------------------------------------------------------------------------------------------------------------------------------------------------------------------------------------------------------------------------------------------------------------------------------------|
| YP_615384 | Sala_0328 | TolB-like protein                                          | 61.45%            | 23                      | R.IFFDFDQYVNDQAQTLQSQAWLQR.N<br>K.APDTLPPAPEGAGTDTTDTGTGVPVGSQEDFVANVASDR.I<br>R.PAAGISNEEAWAQR.NR<br>R.RAVTVVIGR.<br>R.INVSYGK.E<br>K.ERPAAGSNEEAWAQR.NR.A<br>R.VTLEGHADERGTR.D<br>R.AVTVVIGR.<br>R.SSLWQVDLTGVNLR.R<br>R.LTTAPGIDVGGSFSPDGR.K<br>R.TVIGIPSFATASQTVAGLR.T<br>R.SGSQQLVVMNIDGSNQQR.I<br>R.QLADVIAADLER.S<br>R.FITNGQALALSPR.F<br>R.LSGEAPFFDSR.V<br>R.VFYDVASGTQR.L<br>R.ETIEGTLGQER.T<br>R.WSPDGTQLYSMAVGGNTDIYR.I<br>K.IVVVSYLNDR.V<br>R.SGLFEPGNGVR.A<br>R.RLPTPDGSDPSWGPVLP.<br>R.VAYIAESGPK.G<br>R.IGVMTSPSGGVR.M<br>R.MLTNGWQDEAPTWSPNGR.V<br>R.ISANGTTPVR.L<br>K.GFEIQPADWR.R<br>R.VAYIAESGPKGNR.I<br>R.LTTAPGIDVGGSFSPDGRK.I<br>R.GDLIAFTR.M<br>R.FGEWQAR.G<br>K.CADAIYSR.L<br>R.AKPVTEEEEPVQLSINADDTLYGDEIVPEALPAR.L<br>R.IALVTTGAEASADTPPTADAADVTDGSDSGQ.                                                                                                                                                                                                                                                                                                                                                                                                                                                                                                                                                                                                                                                                                       |
| YP_615386 | Sala_0330 | Biopolymer transport protein ExbD/TolR                     | 39.31%            | 2                       | R.IALVTTGAEASADTPPTADAADVTDGSDSGQ.                                                                                                                                                                                                                                                                                                                                                                                                                                                                                                                                                                                                                                                                                                                                                                                                                                                                                                                                                                                                                                                                                                                                                                                                                                                                                                                                                                                                                                        |
| YP_615387 | Sala_0331 | MotA/TolQ/ExbB proton channel                              | 25.86%            | 7                       | R.FDKNGAEELPSAK.V<br>R.FADGLHATSR.E<br>K.VLSAGIGEW.R<br>R.LGIAMNSAIAGEIDR.L<br>R.LGIAMNSAIAGEIDRLAEK.I<br>R.ADNIDRFFDKNGAEELPSAK.V<br>K.NGAEELPSAK.V<br>R.TNDTSLGELTIDGR.V<br>R.VYFEDTDLGSLVYHANYLR.Y                                                                                                                                                                                                                                                                                                                                                                                                                                                                                                                                                                                                                                                                                                                                                                                                                                                                                                                                                                                                                                                                                                                                                                                                                                                                     |
| YP_615388 | Sala_0332 | 4-hydroxybenzoyl-CoA thioesterase                          | 20.75%            | 2                       | R.TPEDADALRPK.T<br>K.TLAEFVQQAAR.E<br>R.GDALDHVLFPPGLGK.T<br>R.DTIEDVIEPYLQGLIAR.T<br>R.LLGLAIAPDGALEIAK.R<br>R.IDLPQTLVGAATR.Q<br>K.AGDLAALLNLEDGDVLFIDEIHR.L<br>R.VRDFAAVAGHAIVDAR.A<br>R.DFAAVAGHAIVDAR.A                                                                                                                                                                                                                                                                                                                                                                                                                                                                                                                                                                                                                                                                                                                                                                                                                                                                                                                                                                                                                                                                                                                                                                                                                                                              |
| YP_615389 | Sala_0333 | Holliday junction DNA helicase RuvB                        | 38.46%            | 9                       | K.VALAILSALEVADLQR.A<br>R.LLTSVGVGAK.V<br>R.LDSNGAGHAVIDVGGVGLVEASAR.T<br>R.ALASGDSAMIAR.A<br>R.NGGNLGTSVSGSHGFDR.L<br>K.SEVADEATAQLFK.L<br>K.ASGDGDNYEIRYEGYGGVSLIVEALTDNR.N<br>R.YEYGGVSLIVEALTDNR.N<br>K.ASGDGDNYEIR.Y<br>K.LIDTDDDDVQTVWNGYEIPDAVMEK.L<br>R.TAFSRNGNLGTSVSGSHGFDR.L<br>K.MGLPDDANAR.L<br>R.DLFASITDIVGGR.S<br>R.SGKYEDVLR.A<br>K.EALGEMEAIAK.L<br>K.GIADDIRDTYNEAK.S<br>R.KEMEAILDVK.S<br>K.DLAFALQHVWIALSFVQRPEDVAEAR.R<br>R.GDLGVELPPEAVPPLQK.R<br>R.VHLPHPELFALEPDTR.L<br>R.IDELELADAAMVAR.G<br>R.ERPGAPLLVTPR.K<br>K.GAAFMLDITDAPGDATR.V<br>K.ETGRPTLLDLQGP.L<br>R.KGVNVPDVPVPLAALTEK.D<br>R.LLIDDKLVLR.V<br>K.SVSAERITIVVGGK.I<br>R.VNMSHGDHAGHAK.V<br>R.ILATLGPASANAEMIAALHR.A<br>K.GVNVDPVVPLAALTEK.D<br>R.MGLLWGAHAVPTR.D<br>R.IETIVEGK.I<br>R.GDLGVELPPEAVPPLQKR.I<br>R.DIGSFEEMIAK.G<br>K.FEKSQVQRIDEILELADAAMVAR.G<br>R.VNMSHGDHAGHAKVIAAIR.S<br>R.SVEGDPDYFR.R<br>R.AGADAFR.V<br>R.LPEWVPR.F<br>K.ALLLGYAIGK.L<br>K.TYTVLSGLIRPLVESR.L<br>R.TPGEHTLTPDQWR.A<br>K.WLNSIYAGVDMPLDLLATR.G<br>R.EWLTDSPGKVELFGSK.A<br>R.RTFGEHTLTPDQWR.A<br>R.LKGFAYEVTVR.R<br>R.GTIVTNGAGINAITAEVVMGMLTVAK.G<br>K.DMAAVITAATK.L<br>R.RLETPEVHPGEAR.V<br>K.TATITSEIEAILTR.R<br>K.LVEEAVTDPFIQDNR.L<br>R.LIATMDQIFGLR.L<br>R.HYTEAYWADVK.A<br>R.EIHPNEIAQNQAR.S<br>R.SELEFSWEGLGAALTR.L<br>R.HATDEGESR.I<br>R.AYVFADTLGR.T<br>K.AGKPEANHSIATDYVPMIEFAK.A<br>K.LTHVINITDVGHITDDADAGEDKLEK.A<br>K.AQSIWDIAR.H<br>R.IWMHNNFLVER.S<br>K.RHPADFAWR.K<br>K.DFATSDK.L |
| YP_615391 | Sala_0335 | Holliday junction DNA helicase RuvA                        | 32.16%            | 4                       | R.GGNATFSQTGTASIGDIR.V<br>R.VDGSAAVIAEAANIR.I<br>R.LSAGYVIVGGELDTPAVSAVAATVAAADTLFR.S<br>R.SGVAGPQIDLQGTGIDASGDIAGR.I<br>R.QJALNGTVNSYIGSTTGP.R<br>R.IGTAGVTTALSLANNNANQTFIGGAPGGSVSGYR.I<br>R.IGALFASGPIDASADAIR.I<br>R.FVDASGGALGR.Q<br>R.NDGIVLDEGALFAR.G<br>R.IVWNGHLGAGGR.V<br>R.GFTFAGGLDLVTEGASR.I<br>R.AQWAAADPLLAYEFGGNTVGR.G<br>R.AQALAEWRPK.L<br>R.TPVTDFMAQNLGSR.D<br>R.LGASYIYAWTRPDVTGLPIK.S<br>R.LDDAPVFNIAAER.Y<br>R.GDAGANEALLQR.Y<br>R.EEIQRPPLPAAPPGER.I<br>R.APNLWLLDVR.Q<br>R.STGPSASYTGAAL.L<br>R.GPNDPIAETR.A<br>R.TLSGPGTFSATGNVQASQLSGSNVSR.M<br>R.KWPTDVLVQYGVVDR.L                                                                                                                                                                                                                                                                                                                                                                                                                                                                                                                                                                                                                                                                                                                                                                                                                                                                             |
| YP_615393 | Sala_0337 | protein of unknown function DUF28                          | 43.15%            | 8                       | R.AGADAFR.V<br>R.LPEWVPR.F<br>K.ALLLGYAIGK.L<br>K.TYTVLSGLIRPLVESR.L<br>R.TPGEHTLTPDQWR.A<br>K.WLNSIYAGVDMPLDLLATR.G<br>R.EWLTDSPGKVELFGSK.A<br>R.RTFGEHTLTPDQWR.A<br>R.LKGFAYEVTVR.R<br>R.GTIVTNGAGINAITAEVVMGMLTVAK.G<br>K.DMAAVITAATK.L<br>R.RLETPEVHPGEAR.V<br>K.TATITSEIEAILTR.R<br>K.LVEEAVTDPFIQDNR.L<br>R.LIATMDQIFGLR.L<br>R.HYTEAYWADVK.A<br>R.EIHPNEIAQNQAR.S<br>R.SELEFSWEGLGAALTR.L<br>R.HATDEGESR.I<br>R.AYVFADTLGR.T<br>K.AGKPEANHSIATDYVPMIEFAK.A<br>K.LTHVINITDVGHITDDADAGEDKLEK.A<br>K.AQSIWDIAR.H<br>R.IWMHNNFLVER.S<br>K.RHPADFAWR.K<br>K.DFATSDK.L<br>R.GGNATFSQTGTASIGDIR.V<br>R.VDGSAAVIAEAANIR.I<br>R.LSAGYVIVGGELDTPAVSAVAATVAAADTLFR.S<br>R.SGVAGPQIDLQGTGIDASGDIAGR.I<br>R.QJALNGTVNSYIGSTTGP.R<br>R.IGTAGVTTALSLANNNANQTFIGGAPGGSVSGYR.I<br>R.IGALFASGPIDASADAIR.I<br>R.FVDASGGALGR.Q<br>R.NDGIVLDEGALFAR.G<br>R.IVWNGHLGAGGR.V<br>R.GFTFAGGLDLVTEGASR.I<br>R.AQWAAADPLLAYEFGGNTVGR.G<br>R.AQALAEWRPK.L<br>R.TPVTDFMAQNLGSR.D<br>R.LGASYIYAWTRPDVTGLPIK.S<br>R.LDDAPVFNIAAER.Y<br>R.GDAGANEALLQR.Y<br>R.EEIQRPPLPAAPPGER.I<br>R.APNLWLLDVR.Q<br>R.STGPSASYTGAAL.L<br>R.GPNDPIAETR.A<br>R.TLSGPGTFSATGNVQASQLSGSNVSR.M<br>R.KWPTDVLVQYGVVDR.L                                                                                                                                                                                                                                                                                                  |
| YP_615394 | Sala_0338 | protein of unknown function DUF74                          | 33.33%            | 3                       | R.DLFASITDIVGGR.S<br>R.SGKYEDVLR.A<br>K.EALGEMEAIAK.L<br>K.GIADDIRDTYNEAK.S<br>R.KEMEAILDVK.S<br>K.DLAFALQHVWIALSFVQRPEDVAEAR.R<br>R.GDLGVELPPEAVPPLQK.R<br>R.VHLPHPELFALEPDTR.L<br>R.IDELELADAAMVAR.G<br>R.ERPGAPLLVTPR.K<br>K.GAAFMLDITDAPGDATR.V<br>K.ETGRPTLLDLQGP.L<br>R.KGVNVPDVPVPLAALTEK.D<br>R.LLIDDKLVLR.V<br>K.SVSAERITIVVGGK.I<br>R.VNMSHGDHAGHAK.V<br>R.ILATLGPASANAEMIAALHR.A<br>K.GVNVDPVVPLAALTEK.D<br>R.MGLLWGAHAVPTR.D<br>R.IETIVEGK.I<br>R.GDLGVELPPEAVPPLQKR.I<br>R.DIGSFEEMIAK.G<br>K.FEKSQVQRIDEILELADAAMVAR.G<br>R.VNMSHGDHAGHAKVIAAIR.S<br>R.SVEGDPDYFR.R<br>R.AGADAFR.V<br>R.LPEWVPR.F<br>K.ALLLGYAIGK.L<br>K.TYTVLSGLIRPLVESR.L<br>R.TPGEHTLTPDQWR.A<br>K.WLNSIYAGVDMPLDLLATR.G<br>R.EWLTDSPGKVELFGSK.A<br>R.RTFGEHTLTPDQWR.A<br>R.LKGFAYEVTVR.R<br>R.GTIVTNGAGINAITAEVVMGMLTVAK.G<br>K.DMAAVITAATK.L<br>R.RLETPEVHPGEAR.V<br>K.TATITSEIEAILTR.R<br>K.LVEEAVTDPFIQDNR.L<br>R.LIATMDQIFGLR.L<br>R.HYTEAYWADVK.A<br>R.EIHPNEIAQNQAR.S<br>R.SELEFSWEGLGAALTR.L<br>R.HATDEGESR.I<br>R.AYVFADTLGR.T<br>K.AGKPEANHSIATDYVPMIEFAK.A<br>K.LTHVINITDVGHITDDADAGEDKLEK.A<br>K.AQSIWDIAR.H<br>R.IWMHNNFLVER.S<br>K.RHPADFAWR.K<br>K.DFATSDK.L                                                                                                                                                                                                                                                                                                              |
| YP_615395 | Sala_0339 | hypothetical protein                                       | 31.25%            | 2                       | R.KEMEAILDVK.S<br>K.DLAFALQHVWIALSFVQRPEDVAEAR.R<br>R.GDLGVELPPEAVPPLQK.R<br>R.VHLPHPELFALEPDTR.L<br>R.IDELELADAAMVAR.G<br>R.ERPGAPLLVTPR.K<br>K.GAAFMLDITDAPGDATR.V<br>K.ETGRPTLLDLQGP.L<br>R.KGVNVPDVPVPLAALTEK.D<br>R.LLIDDKLVLR.V<br>K.SVSAERITIVVGGK.I<br>R.VNMSHGDHAGHAK.V<br>R.ILATLGPASANAEMIAALHR.A<br>K.GVNVDPVVPLAALTEK.D<br>R.MGLLWGAHAVPTR.D<br>R.IETIVEGK.I<br>R.GDLGVELPPEAVPPLQKR.I<br>R.DIGSFEEMIAK.G<br>K.FEKSQVQRIDEILELADAAMVAR.G<br>R.VNMSHGDHAGHAKVIAAIR.S<br>R.SVEGDPDYFR.R<br>R.AGADAFR.V<br>R.LPEWVPR.F<br>K.ALLLGYAIGK.L<br>K.TYTVLSGLIRPLVESR.L<br>R.TPGEHTLTPDQWR.A<br>K.WLNSIYAGVDMPLDLLATR.G<br>R.EWLTDSPGKVELFGSK.A<br>R.RTFGEHTLTPDQWR.A<br>R.LKGFAYEVTVR.R<br>R.GTIVTNGAGINAITAEVVMGMLTVAK.G<br>K.DMAAVITAATK.L<br>R.RLETPEVHPGEAR.V<br>K.TATITSEIEAILTR.R<br>K.LVEEAVTDPFIQDNR.L<br>R.LIATMDQIFGLR.L<br>R.HYTEAYWADVK.A<br>R.EIHPNEIAQNQAR.S<br>R.SELEFSWEGLGAALTR.L<br>R.HATDEGESR.I<br>R.AYVFADTLGR.T<br>K.AGKPEANHSIATDYVPMIEFAK.A<br>K.LTHVINITDVGHITDDADAGEDKLEK.A<br>K.AQSIWDIAR.H<br>R.IWMHNNFLVER.S<br>K.RHPADFAWR.K<br>K.DFATSDK.L                                                                                                                                                                                                                                                                                                                                                                                             |
| YP_615397 | Sala_0341 | Pyruvate kinase                                            | 53.31%            | 21                      | R.DLAFALQHVWIALSFVQRPEDVAEAR.R<br>R.GDLGVELPPEAVPPLQK.R<br>R.VHLPHPELFALEPDTR.L<br>R.IDELELADAAMVAR.G<br>R.ERPGAPLLVTPR.K<br>K.GAAFMLDITDAPGDATR.V<br>K.ETGRPTLLDLQGP.L<br>R.KGVNVPDVPVPLAALTEK.D<br>R.LLIDDKLVLR.V<br>K.SVSAERITIVVGGK.I<br>R.VNMSHGDHAGHAK.V<br>R.ILATLGPASANAEMIAALHR.A<br>K.GVNVDPVVPLAALTEK.D<br>R.MGLLWGAHAVPTR.D<br>R.IETIVEGK.I<br>R.GDLGVELPPEAVPPLQKR.I<br>R.DIGSFEEMIAK.G<br>K.FEKSQVQRIDEILELADAAMVAR.G<br>R.VNMSHGDHAGHAKVIAAIR.S<br>R.SVEGDPDYFR.R<br>R.AGADAFR.V<br>R.LPEWVPR.F<br>K.ALLLGYAIGK.L<br>K.TYTVLSGLIRPLVESR.L<br>R.TPGEHTLTPDQWR.A<br>K.WLNSIYAGVDMPLDLLATR.G<br>R.EWLTDSPGKVELFGSK.A<br>R.RTFGEHTLTPDQWR.A<br>R.LKGFAYEVTVR.R<br>R.GTIVTNGAGINAITAEVVMGMLTVAK.G<br>K.DMAAVITAATK.L<br>R.RLETPEVHPGEAR.V<br>K.TATITSEIEAILTR.R<br>K.LVEEAVTDPFIQDNR.L<br>R.LIATMDQIFGLR.L<br>R.HYTEAYWADVK.A<br>R.EIHPNEIAQNQAR.S<br>R.SELEFSWEGLGAALTR.L<br>R.HATDEGESR.I<br>R.AYVFADTLGR.T<br>K.AGKPEANHSIATDYVPMIEFAK.A<br>K.LTHVINITDVGHITDDADAGEDKLEK.A<br>K.AQSIWDIAR.H<br>R.IWMHNNFLVER.S<br>K.RHPADFAWR.K<br>K.DFATSDK.L                                                                                                                                                                                                                                                                                                                                                                                                               |
| YP_615403 | Sala_0347 | D-isomer specific 2-hydroxyacid dehydrogenase, NAD-binding | 43.31%            | 10                      | R.AGADAFR.V<br>R.LPEWVPR.F<br>K.ALLLGYAIGK.L<br>K.TYTVLSGLIRPLVESR.L<br>R.TPGEHTLTPDQWR.A<br>K.WLNSIYAGVDMPLDLLATR.G<br>R.EWLTDSPGKVELFGSK.A<br>R.RTFGEHTLTPDQWR.A<br>R.LKGFAYEVTVR.R<br>R.GTIVTNGAGINAITAEVVMGMLTVAK.G<br>K.DMAAVITAATK.L<br>R.RLETPEVHPGEAR.V<br>K.TATITSEIEAILTR.R<br>K.LVEEAVTDPFIQDNR.L<br>R.LIATMDQIFGLR.L<br>R.HYTEAYWADVK.A<br>R.EIHPNEIAQNQAR.S<br>R.SELEFSWEGLGAALTR.L<br>R.HATDEGESR.I<br>R.AYVFADTLGR.T<br>K.AGKPEANHSIATDYVPMIEFAK.A<br>K.LTHVINITDVGHITDDADAGEDKLEK.A<br>K.AQSIWDIAR.H<br>R.IWMHNNFLVER.S<br>K.RHPADFAWR.K<br>K.DFATSDK.L<br>R.GGNATFSQTGTASIGDIR.V<br>R.VDGSAAVIAEAANIR.I<br>R.LSAGYVIVGGELDTPAVSAVAATVAAADTLFR.S<br>R.SGVAGPQIDLQGTGIDASGDIAGR.I<br>R.QJALNGTVNSYIGSTTGP.R<br>R.IGTAGVTTALSLANNNANQTFIGGAPGGSVSGYR.I<br>R.IGALFASGPIDASADAIR.I<br>R.FVDASGGALGR.Q<br>R.NDGIVLDEGALFAR.G<br>R.IVWNGHLGAGGR.V<br>R.GFTFAGGLDLVTEGASR.I<br>R.AQWAAADPLLAYEFGGNTVGR.G<br>R.AQALAEWRPK.L<br>R.TPVTDFMAQNLGSR.D<br>R.LGASYIYAWTRPDVTGLPIK.S<br>R.LDDAPVFNIAAER.Y<br>R.GDAGANEALLQR.Y<br>R.EEIQRPPLPAAPPGER.I<br>R.APNLWLLDVR.Q<br>R.STGPSASYTGAAL.L<br>R.GPNDPIAETR.A<br>R.TLSGPGTFSATGNVQASQLSGSNVSR.M<br>R.KWPTDVLVQYGVVDR.L                                                                                                                                                                                                                                                                                                  |
| YP_615405 | Sala_0349 | cysteinyl-tRNA synthetase                                  | 38.71%            | 15                      | R.AYVFADTLGR.T<br>K.AGKPEANHSIATDYVPMIEFAK.A<br>K.LTHVINITDVGHITDDADAGEDKLEK.A<br>K.AQSIWDIAR.H<br>R.IWMHNNFLVER.S<br>K.RHPADFAWR.K<br>K.DFATSDK.L<br>R.GGNATFSQTGTASIGDIR.V<br>R.VDGSAAVIAEAANIR.I<br>R.LSAGYVIVGGELDTPAVSAVAATVAAADTLFR.S<br>R.SGVAGPQIDLQGTGIDASGDIAGR.I<br>R.QJALNGTVNSYIGSTTGP.R<br>R.IGTAGVTTALSLANNNANQTFIGGAPGGSVSGYR.I<br>R.IGALFASGPIDASADAIR.I<br>R.FVDASGGALGR.Q<br>R.NDGIVLDEGALFAR.G<br>R.IVWNGHLGAGGR.V<br>R.GFTFAGGLDLVTEGASR.I<br>R.AQWAAADPLLAYEFGGNTVGR.G<br>R.AQALAEWRPK.L<br>R.TPVTDFMAQNLGSR.D<br>R.LGASYIYAWTRPDVTGLPIK.S<br>R.LDDAPVFNIAAER.Y<br>R.GDAGANEALLQR.Y<br>R.EEIQRPPLPAAPPGER.I<br>R.APNLWLLDVR.Q<br>R.STGPSASYTGAAL.L<br>R.GPNDPIAETR.A<br>R.TLSGPGTFSATGNVQASQLSGSNVSR.M<br>R.KWPTDVLVQYGVVDR.L                                                                                                                                                                                                                                                                                                                                                                                                                                                                                                                                                                                                                                                                                                                       |
| YP_615406 | Sala_0350 | hypothetical protein                                       | 10.53%            | 11                      | R.AYVFADTLGR.T<br>K.AGKPEANHSIATDYVPMIEFAK.A<br>K.LTHVINITDVGHITDDADAGEDKLEK.A<br>K.AQSIWDIAR.H<br>R.IWMHNNFLVER.S<br>K.RHPADFAWR.K<br>K.DFATSDK.L<br>R.GGNATFSQTGTASIGDIR.V<br>R.VDGSAAVIAEAANIR.I<br>R.LSAGYVIVGGELDTPAVSAVAATVAAADTLFR.S<br>R.SGVAGPQIDLQGTGIDASGDIAGR.I<br>R.QJALNGTVNSYIGSTTGP.R<br>R.IGTAGVTTALSLANNNANQTFIGGAPGGSVSGYR.I<br>R.IGALFASGPIDASADAIR.I<br>R.FVDASGGALGR.Q<br>R.NDGIVLDEGALFAR.G<br>R.IVWNGHLGAGGR.V<br>R.GFTFAGGLDLVTEGASR.I<br>R.AQWAAADPLLAYEFGGNTVGR.G<br>R.AQALAEWRPK.L<br>R.TPVTDFMAQNLGSR.D<br>R.LGASYIYAWTRPDVTGLPIK.S<br>R.LDDAPVFNIAAER.Y<br>R.GDAGANEALLQR.Y<br>R.EEIQRPPLPAAPPGER.I<br>R.APNLWLLDVR.Q<br>R.STGPSASYTGAAL.L<br>R.GPNDPIAETR.A<br>R.TLSGPGTFSATGNVQASQLSGSNVSR.M<br>R.KWPTDVLVQYGVVDR.L                                                                                                                                                                                                                                                                                                                                                                                                                                                                                                                                                                                                                                                                                                                       |
| YP_615407 | Sala_0351 | Hemolysin activation/secretion protein-like protein        | 18.45%            | 7                       | R.AQWAAADPLLAYEFGGNTVGR.G<br>R.AQALAEWRPK.L<br>R.TPVTDFMAQNLGSR.D<br>R.LGASYIYAWTRPDVTGLPIK.S<br>R.LDDAPVFNIAAER.Y<br>R.GDAGANEALLQR.Y<br>R.EEIQRPPLPAAPPGER.I<br>R.APNLWLLDVR.Q<br>R.STGPSASYTGAAL.L<br>R.GPNDPIAETR.A<br>R.TLSGPGTFSATGNVQASQLSGSNVSR.M<br>R.KWPTDVLVQYGVVDR.L                                                                                                                                                                                                                                                                                                                                                                                                                                                                                                                                                                                                                                                                                                                                                                                                                                                                                                                                                                                                                                                                                                                                                                                          |
| YP_615408 | Sala_0352 | hypothetical protein                                       | 53.54%            | 11                      | R.AYVFADTLGR.T<br>K.AGKPEANHSIATDYVPMIEFAK.A<br>K.LTHVINITDVGHITDDADAGEDKLEK.A<br>K.AQSIWDIAR.H<br>R.IWMHNNFLVER.S<br>K.RHPADFAWR.K<br>K.DFATSDK.L<br>R.GGNATFSQTGTASIGDIR.V<br>R.VDGSAAVIAEAANIR.I<br>R.LSAGYVIVGGELDTPAVSAVAATVAAADTLFR.S<br>R.SGVAGPQIDLQGTGIDASGDIAGR.I<br>R.QJALNGTVNSYIGSTTGP.R<br>R.IGTAGVTTALSLANNNANQTFIGGAPGGSVSGYR.I<br>R.IGALFASGPIDASADAIR.I<br>R.FVDASGGALGR.Q<br>R.NDGIVLDEGALFAR.G<br>R.IVWNGHLGAGGR.V<br>R.GFTFAGGLDLVTEGASR.I<br>R.AQWAAADPLLAYEFGGNTVGR.G<br>R.AQALAEWRPK.L<br>R.TPVTDFMAQNLGSR.D<br>R.LGASYIYAWTRPDVTGLPIK.S<br>R.LDDAPVFNIAAER.Y<br>R.GDAGANEALLQR.Y<br>R.EEIQRPPLPAAPPGER.I<br>R.APNLWLLDVR.Q<br>R.STGPSASYTGAAL.L<br>R.GPNDPIAETR.A<br>R.TLSGPGTFSATGNVQASQLSGSNVSR.M<br>R.KWPTDVLVQYGVVDR.L                                                                                                                                                                                                                                                                                                                                                                                                                                                                                                                                                                                                                                                                                                                       |





| Accession | Locus tag | Description                          | Sequence coverage | No. peptides identified | List of peptides identified                                                                                                                                                                                                                                                                                                                                                                                                                                                                                                                                                                                                                                                                                                                                                                                                                                                                                                                                                                                                                    |
|-----------|-----------|--------------------------------------|-------------------|-------------------------|------------------------------------------------------------------------------------------------------------------------------------------------------------------------------------------------------------------------------------------------------------------------------------------------------------------------------------------------------------------------------------------------------------------------------------------------------------------------------------------------------------------------------------------------------------------------------------------------------------------------------------------------------------------------------------------------------------------------------------------------------------------------------------------------------------------------------------------------------------------------------------------------------------------------------------------------------------------------------------------------------------------------------------------------|
| YP_615441 | Sala_0385 | hypothetical protein                 | 29.04%            | 7                       | R.YTRPSLGFESDDINDR.L<br>K.IGGAGFTAPAR.V<br>R.QFSATLVGVSPQHDLAVLK.I<br>R.ASGIEGVFLR.V<br>R.VPIGTSIDLQVGVNVAIGNPFGLDWTUTK.G<br>R.AGLVAQR.T<br>R.LAEWGADSWEEIFR.S<br>R.TALLEEAVGALQPIFGAR.G<br>R.VIASDHGVVDAGELK.I<br>R.LYEITIGADQRRER.E<br>K.VALDEMHVAGVVAALR.D<br>R.ALDEIDIEFEK.V<br>K.LPTGYPEAADIVDEAIMR.V<br>K.GIGALFVDTLAQAR.S<br>R.TPYFLPDQPTIAALGAAALR.G<br>R.LNSSDAYGALR.L<br>K.LGLTYPDPSAVVNDNPETPR.R<br>K.ELSDLPLANVQDPDWLADD.<br>R.DDADAIEHDINR.G<br>R.NGAHNVHAHTTLR.K<br>R.VDNADEEQR.A<br>R.NDISLMADWNTVIEK.L<br>K.NLLTRDDADAIEHDINR.G<br>R.GGIAVFR.V<br>R.EVVGIVYNNHNALEEMATQLVAAGVDR.N<br>R.EVVGIVYNNHNALEEMATQLVAAGVDR.N<br>R.KELSDPLANVQDPDWLADD.<br>R.DDADAIEHDINRGGIAVFR.V<br>K.NGVLTISIPQSAEAR.S<br>R.DINALVDKFEK.I<br>K.IGNLDPWQNEAK.S<br>R.QPVSNAEQEEAHSKLR.D<br>K.ADLKNGVLTISIPQSAEAR.S<br>R.SENRPPQVSNAEQEEAHSKLR.R<br>R.QEEKQVFLSER.A<br>R.AIPLPGLDTPDAKADLK.N<br>R.QPVSNAEQEEAHSKLR.R<br>R.AIPLPGLDTPDAK.A<br>K.IKDLVPWTR.S                                                                                              |
| YP_615442 | Sala_0386 | phospholipase D/Transphosphatidylase | 9.64%             | 3                       | R.PSVSMQEEELQHIEFVSTAYER.S<br>K.IFDPPKTDASMR.D<br>R.YSNGILFAAGLSDADKPR.K<br>R.IYRDPFEILR.K<br>R.ERSYGFTR.A<br>R.AVTLPRIDPENVEAR.Y<br>K.ENLISISGER.A<br>R.TGGAAIIVAEEMPGINPQK.V<br>R.LLTLGSFAPGSYK.Q<br>R.CVVPDAEEIGDQATSDLLVSR.I<br>K.QFAQLTSLDPVDPSPPEAMEMVSLLMK.G<br>K.SVESEVLPEEEGDLQDR.L<br>K.NGENEDGSPSAVGK.S<br>R.AIAEAENAR.K<br>R.RAINDALLK.A<br>R.AINDALLK.A                                                                                                                                                                                                                                                                                                                                                                                                                                                                                                                                                                                                                                                                           |
| YP_615443 | Sala_0388 | hypothetical protein                 | 65.73%            | 12                      | K.TQTYSTADDNQQAVTIR.V<br>K.STNGDTFLGGEDFDSAVVEYLDSFK.K<br>R.NQADSLVHATEK.Q<br>K.YSPQVSAFILQK.M<br>K.TALEGDDHDAIMAK.A<br>R.IQASGGLSEADIDQMVR.D<br>R.IINEPTAALAYGLDKDEGK.T<br>K.STNGDTFLGGEDFDSAVVEYLDSFK.K<br>K.IVEGPNDAWVEAAGEK.Y<br>K.QLEEHGDKIDADTK.A<br>K.IELSSAAQTEINLPFITAR.M<br>K.AVITVPAYFNDAQR.Q<br>K.VREVVEDFGK.K<br>K.IVEGPNDAWVEAAGEKYSQVSAFILQK.M<br>K.VIENSEGAR.T<br>R.QAVINPDNTLFAIKR.L<br>K.EQASAGSADAGR.A<br>R.MEGGTTPLHLVQTVTR.S<br>K.AAVEAAIAETK.T<br>K.MGQIYEKEQASAAGSADAGR.A<br>K.KTQTYSTADDNQQAVTIR.V<br>K.GAIDEVILVGGMTR.M<br>R.GVPQIEVFFDIDANGIVNVSAG.D<br>K.MKETAEYLGEK.V<br>K.AMADAGIDKGAIDEVILVGGMTR.M<br>R.QAVINPDNTLFAIKR.L<br>K.AKIELSSAAQTEINLPFITAR.M<br>R.IAGLEVER.I<br>K.AQALTDAAAMK.M<br>R.TDKLALQR.L<br>K.MGQIYEK.E<br>K.DMELVPYK.I<br>R.TTSPSIVAFTK.D<br>R.MEGGTTPLHLVQTVTR.S<br>R.EVVEFFGK.K<br>R.AAGSEASDDEEVDAEFSEVDDDKD.<br>K.MKETAEYLGEKVEK.A<br>K.MGQIYEKEQASAAGSADAGR.A<br>K.AQALTDAAAMK.M<br>R.SELEKLVGLIKR<br>R.RFDPTTKK.D<br>R.REAAEAR.N<br>R.IQASGGLSEADIDQMVR.D<br>K.LVDGLIKR.T<br>K.FAEEDKK.R |
| YP_615444 | Sala_0389 | heat shock protein Hsp20             | 73.49%            | 11                      | R.NRPAIDALPER.I<br>R.FAETVQVDLSDAEQR.A<br>R.GSDVLYAVNVPFENIATAKPFAINLDGGEQLEVK.I<br>R.YDRGEIDEHGNPR.A<br>R.APYGFEDFQGHGPFSGGGPFR.S<br>R.SAQDGATSFHFGSDSEELGDFADLFR.G<br>R.WDEAVLGAK.V<br>R.LHWDLFONDKSLAEAWAK.E<br>K.VRVPTIDGPIMLTPVK.G<br>R.GSDVLYAVNVPFENIATAK.P<br>R.YGVQGVPAIIFK.N<br>K.ALFNPGSPVDLLGQR.F<br>R.AMAPSFAQVTAIEPR.A<br>K.VDIDKAPELAR.Y<br>R.FQPVYIDEPSVEDTISILR.G<br>K.AGELSYTIPSEK.Q<br>R.LIGAPPYGVYEGGVLTEAVR.R<br>R.VIGQQAVQAVSK.A<br>K.SLEAVIQEVTGGR.T<br>K.GFLQSAQTVAVR.M<br>R.LLDQAEQAK.K<br>R.TADSASAEESYDALKK.Y<br>R.GELHVIGATTLDEYQK.Y<br>R.ILQAMALSDSTDAK.A<br>R.GANETALLREEVTEEDIASVVS.R.W<br>K.KAGDSFVQVR.I<br>K.AHDQVFNVLQVLDLDDGR.L<br>R.LELEQAR.A<br>K.NNPVLIQDPGVGK.T<br>R.RVIGQQAVQAVSK.A                                                                                                                                                                                                                                                                                                                    |
| YP_615446 | Sala_0390 | heat shock protein Hsp20             | 26.92%            | 2                       | R.PSVSMQEEELQHIEFVSTAYER.S<br>K.IFDPPKTDASMR.D<br>R.YSNGILFAAGLSDADKPR.K<br>R.IYRDPFEILR.K<br>R.ERSYGFTR.A<br>R.AVTLPRIDPENVEAR.Y<br>K.ENLISISGER.A<br>R.TGGAAIIVAEEMPGINPQK.V<br>R.LLTLGSFAPGSYK.Q<br>R.CVVPDAEEIGDQATSDLLVSR.I<br>K.QFAQLTSLDPVDPSPPEAMEMVSLLMK.G<br>K.SVESEVLPEEEGDLQDR.L<br>K.NGENEDGSPSAVGK.S<br>R.AIAEAENAR.K<br>R.RAINDALLK.A<br>R.AINDALLK.A                                                                                                                                                                                                                                                                                                                                                                                                                                                                                                                                                                                                                                                                           |
| YP_615447 | Sala_0391 | heat shock protein Hsp20             | 58.87%            | 6                       | K.TQTYSTADDNQQAVTIR.V<br>K.STNGDTFLGGEDFDSAVVEYLDSFK.K<br>R.NQADSLVHATEK.Q<br>K.YSPQVSAFILQK.M<br>K.TALEGDDHDAIMAK.A<br>R.IQASGGLSEADIDQMVR.D<br>R.IINEPTAALAYGLDKDEGK.T<br>K.STNGDTFLGGEDFDSAVVEYLDSFK.K<br>K.IVEGPNDAWVEAAGEK.Y<br>K.QLEEHGDKIDADTK.A<br>K.IELSSAAQTEINLPFITAR.M<br>K.AVITVPAYFNDAQR.Q<br>K.VREVVEDFGK.K<br>K.IVEGPNDAWVEAAGEKYSQVSAFILQK.M<br>K.VIENSEGAR.T<br>R.QAVINPDNTLFAIKR.L<br>K.EQASAGSADAGR.A<br>R.MEGGTTPLHLVQTVTR.S<br>K.AAVEAAIAETK.T<br>K.MGQIYEKEQASAAGSADAGR.A<br>K.KTQTYSTADDNQQAVTIR.V<br>K.GAIDEVILVGGMTR.M<br>R.GVPQIEVFFDIDANGIVNVSAG.D<br>K.MKETAEYLGEK.V<br>K.AMADAGIDKGAIDEVILVGGMTR.M<br>R.QAVINPDNTLFAIKR.L<br>K.AKIELSSAAQTEINLPFITAR.M<br>R.IAGLEVER.I<br>K.AQALTDAAAMK.M<br>R.TDKLALQR.L<br>K.MGQIYEK.E<br>K.DMELVPYK.I<br>R.TTSPSIVAFTK.D<br>R.MEGGTTPLHLVQTVTR.S<br>R.EVVEFFGK.K<br>R.AAGSEASDDEEVDAEFSEVDDDKD.<br>K.MKETAEYLGEKVEK.A<br>K.MGQIYEKEQASAAGSADAGR.A<br>K.AQALTDAAAMK.M<br>R.SELEKLVGLIKR<br>R.RFDPTTKK.D<br>R.REAAEAR.N<br>R.IQASGGLSEADIDQMVR.D<br>K.LVDGLIKR.T<br>K.FAEEDKK.R |
| YP_615450 | Sala_0395 | Ferritin and Dps                     | 37.89%            | 3                       | R.NRPAIDALPER.I<br>R.FAETVQVDLSDAEQR.A<br>R.GSDVLYAVNVPFENIATAKPFAINLDGGEQLEVK.I<br>R.YDRGEIDEHGNPR.A<br>R.APYGFEDFQGHGPFSGGGPFR.S<br>R.SAQDGATSFHFGSDSEELGDFADLFR.G<br>R.WDEAVLGAK.V<br>R.LHWDLFONDKSLAEAWAK.E<br>K.VRVPTIDGPIMLTPVK.G<br>R.GSDVLYAVNVPFENIATAK.P<br>R.YGVQGVPAIIFK.N<br>K.ALFNPGSPVDLLGQR.F<br>R.AMAPSFAQVTAIEPR.A<br>K.VDIDKAPELAR.Y<br>R.FQPVYIDEPSVEDTISILR.G<br>K.AGELSYTIPSEK.Q<br>R.LIGAPPYGVYEGGVLTEAVR.R<br>R.VIGQQAVQAVSK.A<br>K.SLEAVIQEVTGGR.T<br>K.GFLQSAQTVAVR.M<br>R.LLDQAEQAK.K<br>R.TADSASAEESYDALKK.Y<br>R.GELHVIGATTLDEYQK.Y<br>R.ILQAMALSDSTDAK.A<br>R.GANETALLREEVTEEDIASVVS.R.W<br>K.KAGDSFVQVR.I<br>K.AHDQVFNVLQVLDLDDGR.L<br>R.LELEQAR.A<br>K.NNPVLIQDPGVGK.T<br>R.RVIGQQAVQAVSK.A                                                                                                                                                                                                                                                                                                                    |
| YP_615456 | Sala_0401 | GrpE protein                         | 28.65%            | 5                       | R.NRPAIDALPER.I<br>R.FAETVQVDLSDAEQR.A<br>R.GSDVLYAVNVPFENIATAKPFAINLDGGEQLEVK.I<br>R.YDRGEIDEHGNPR.A<br>R.APYGFEDFQGHGPFSGGGPFR.S<br>R.SAQDGATSFHFGSDSEELGDFADLFR.G<br>R.WDEAVLGAK.V<br>R.LHWDLFONDKSLAEAWAK.E<br>K.VRVPTIDGPIMLTPVK.G<br>R.GSDVLYAVNVPFENIATAK.P<br>R.YGVQGVPAIIFK.N<br>K.ALFNPGSPVDLLGQR.F<br>R.AMAPSFAQVTAIEPR.A<br>K.VDIDKAPELAR.Y<br>R.FQPVYIDEPSVEDTISILR.G<br>K.AGELSYTIPSEK.Q<br>R.LIGAPPYGVYEGGVLTEAVR.R<br>R.VIGQQAVQAVSK.A<br>K.SLEAVIQEVTGGR.T<br>K.GFLQSAQTVAVR.M<br>R.LLDQAEQAK.K<br>R.TADSASAEESYDALKK.Y<br>R.GELHVIGATTLDEYQK.Y<br>R.ILQAMALSDSTDAK.A<br>R.GANETALLREEVTEEDIASVVS.R.W<br>K.KAGDSFVQVR.I<br>K.AHDQVFNVLQVLDLDDGR.L<br>R.LELEQAR.A<br>K.NNPVLIQDPGVGK.T<br>R.RVIGQQAVQAVSK.A                                                                                                                                                                                                                                                                                                                    |
| YP_615457 | Sala_0402 | Chaperone DnaK                       | 70.76%            | 46                      | R.NRPAIDALPER.I<br>R.FAETVQVDLSDAEQR.A<br>R.GSDVLYAVNVPFENIATAKPFAINLDGGEQLEVK.I<br>R.YDRGEIDEHGNPR.A<br>R.APYGFEDFQGHGPFSGGGPFR.S<br>R.SAQDGATSFHFGSDSEELGDFADLFR.G<br>R.WDEAVLGAK.V<br>R.LHWDLFONDKSLAEAWAK.E<br>K.VRVPTIDGPIMLTPVK.G<br>R.GSDVLYAVNVPFENIATAK.P<br>R.YGVQGVPAIIFK.N<br>K.ALFNPGSPVDLLGQR.F<br>R.AMAPSFAQVTAIEPR.A<br>K.VDIDKAPELAR.Y<br>R.FQPVYIDEPSVEDTISILR.G<br>K.AGELSYTIPSEK.Q<br>R.LIGAPPYGVYEGGVLTEAVR.R<br>R.VIGQQAVQAVSK.A<br>K.SLEAVIQEVTGGR.T<br>K.GFLQSAQTVAVR.M<br>R.LLDQAEQAK.K<br>R.TADSASAEESYDALKK.Y<br>R.GELHVIGATTLDEYQK.Y<br>R.ILQAMALSDSTDAK.A<br>R.GANETALLREEVTEEDIASVVS.R.W<br>K.KAGDSFVQVR.I<br>K.AHDQVFNVLQVLDLDDGR.L<br>R.LELEQAR.A<br>K.NNPVLIQDPGVGK.T<br>R.RVIGQQAVQAVSK.A                                                                                                                                                                                                                                                                                                                    |
| YP_615458 | Sala_0403 | histidine kinase                     | 36.16%            | 7                       | R.NRPAIDALPER.I<br>R.FAETVQVDLSDAEQR.A<br>R.GSDVLYAVNVPFENIATAKPFAINLDGGEQLEVK.I<br>R.YDRGEIDEHGNPR.A<br>R.APYGFEDFQGHGPFSGGGPFR.S<br>R.SAQDGATSFHFGSDSEELGDFADLFR.G<br>R.WDEAVLGAK.V<br>R.LHWDLFONDKSLAEAWAK.E<br>K.VRVPTIDGPIMLTPVK.G<br>R.GSDVLYAVNVPFENIATAK.P<br>R.YGVQGVPAIIFK.N<br>K.ALFNPGSPVDLLGQR.F<br>R.AMAPSFAQVTAIEPR.A<br>K.VDIDKAPELAR.Y<br>R.FQPVYIDEPSVEDTISILR.G<br>K.AGELSYTIPSEK.Q<br>R.LIGAPPYGVYEGGVLTEAVR.R<br>R.VIGQQAVQAVSK.A<br>K.SLEAVIQEVTGGR.T<br>K.GFLQSAQTVAVR.M<br>R.LLDQAEQAK.K<br>R.TADSASAEESYDALKK.Y<br>R.GELHVIGATTLDEYQK.Y<br>R.ILQAMALSDSTDAK.A<br>R.GANETALLREEVTEEDIASVVS.R.W<br>K.KAGDSFVQVR.I<br>K.AHDQVFNVLQVLDLDDGR.L<br>R.LELEQAR.A<br>K.NNPVLIQDPGVGK.T<br>R.RVIGQQAVQAVSK.A                                                                                                                                                                                                                                                                                                                    |
| YP_615459 | Sala_0404 | heat shock protein DnaJ-like protein | 50.00%            | 9                       | R.NRPAIDALPER.I<br>R.FAETVQVDLSDAEQR.A<br>R.GSDVLYAVNVPFENIATAKPFAINLDGGEQLEVK.I<br>R.YDRGEIDEHGNPR.A<br>R.APYGFEDFQGHGPFSGGGPFR.S<br>R.SAQDGATSFHFGSDSEELGDFADLFR.G<br>R.WDEAVLGAK.V<br>R.LHWDLFONDKSLAEAWAK.E<br>K.VRVPTIDGPIMLTPVK.G<br>R.GSDVLYAVNVPFENIATAK.P<br>R.YGVQGVPAIIFK.N<br>K.ALFNPGSPVDLLGQR.F<br>R.AMAPSFAQVTAIEPR.A<br>K.VDIDKAPELAR.Y<br>R.FQPVYIDEPSVEDTISILR.G<br>K.AGELSYTIPSEK.Q<br>R.LIGAPPYGVYEGGVLTEAVR.R<br>R.VIGQQAVQAVSK.A<br>K.SLEAVIQEVTGGR.T<br>K.GFLQSAQTVAVR.M<br>R.LLDQAEQAK.K<br>R.TADSASAEESYDALKK.Y<br>R.GELHVIGATTLDEYQK.Y<br>R.ILQAMALSDSTDAK.A<br>R.GANETALLREEVTEEDIASVVS.R.W<br>K.KAGDSFVQVR.I<br>K.AHDQVFNVLQVLDLDDGR.L<br>R.LELEQAR.A<br>K.NNPVLIQDPGVGK.T<br>R.RVIGQQAVQAVSK.A                                                                                                                                                                                                                                                                                                                    |
| YP_615460 | Sala_0405 | thioredoxin                          | 37.67%            | 4                       | R.NRPAIDALPER.I<br>R.FAETVQVDLSDAEQR.A<br>R.GSDVLYAVNVPFENIATAKPFAINLDGGEQLEVK.I<br>R.YDRGEIDEHGNPR.A<br>R.APYGFEDFQGHGPFSGGGPFR.S<br>R.SAQDGATSFHFGSDSEELGDFADLFR.G<br>R.WDEAVLGAK.V<br>R.LHWDLFONDKSLAEAWAK.E<br>K.VRVPTIDGPIMLTPVK.G<br>R.GSDVLYAVNVPFENIATAK.P<br>R.YGVQGVPAIIFK.N<br>K.ALFNPGSPVDLLGQR.F<br>R.AMAPSFAQVTAIEPR.A<br>K.VDIDKAPELAR.Y<br>R.FQPVYIDEPSVEDTISILR.G<br>K.AGELSYTIPSEK.Q<br>R.LIGAPPYGVYEGGVLTEAVR.R<br>R.VIGQQAVQAVSK.A<br>K.SLEAVIQEVTGGR.T<br>K.GFLQSAQTVAVR.M<br>R.LLDQAEQAK.K<br>R.TADSASAEESYDALKK.Y<br>R.GELHVIGATTLDEYQK.Y<br>R.ILQAMALSDSTDAK.A<br>R.GANETALLREEVTEEDIASVVS.R.W<br>K.KAGDSFVQVR.I<br>K.AHDQVFNVLQVLDLDDGR.L<br>R.LELEQAR.A<br>K.NNPVLIQDPGVGK.T<br>R.RVIGQQAVQAVSK.A                                                                                                                                                                                                                                                                                                                    |
| YP_615461 | Sala_0406 | ATPase AAA-2                         | 71.23%            | 61                      | R.NRPAIDALPER.I<br>R.FAETVQVDLSDAEQR.A<br>R.GSDVLYAVNVPFENIATAKPFAINLDGGEQLEVK.I<br>R.YDRGEIDEHGNPR.A<br>R.APYGFEDFQGHGPFSGGGPFR.S<br>R.SAQDGATSFHFGSDSEELGDFADLFR.G<br>R.WDEAVLGAK.V<br>R.LHWDLFONDKSLAEAWAK.E<br>K.VRVPTIDGPIMLTPVK.G<br>R.GSDVLYAVNVPFENIATAK.P<br>R.YGVQGVPAIIFK.N<br>K.ALFNPGSPVDLLGQR.F<br>R.AMAPSFAQVTAIEPR.A<br>K.VDIDKAPELAR.Y<br>R.FQPVYIDEPSVEDTISILR.G<br>K.AGELSYTIPSEK.Q<br>R.LIGAPPYGVYEGGVLTEAVR.R<br>R.VIGQQAVQAVSK.A<br>K.SLEAVIQEVTGGR.T<br>K.GFLQSAQTVAVR.M<br>R.LLDQAEQAK.K<br>R.TADSASAEESYDALKK.Y<br>R.GELHVIGATTLDEYQK.Y<br>R.ILQAMALSDSTDAK.A<br>R.GANETALLREEVTEEDIASVVS.R.W<br>K.KAGDSFVQVR.I<br>K.AHDQVFNVLQVLDLDDGR.L<br>R.LELEQAR.A<br>K.NNPVLIQDPGVGK.T<br>R.RVIGQQAVQAVSK.A                                                                                                                                                                                                                                                                                                                    |

| Accession | Locus tag | Description                | Sequence coverage | No. peptides identified | List of peptides identified                                                                                                                                                                                                                                                                                                                                                                                                                                                                                                                                                                                                                                                                                                                                                                                                                                                                                                                                                                                                                                                                                                                                                                                                                                                                                                                                                                                                                                                                                                                                                                                                                                                                                                                                                                                                                                                                                                                                                                                                                                                                                                                                                                                                                                                                                                                                                                                                                                                                                                                                                                                                                                                                                                                                                                                                                                                                                                                                                                                                                                                                                                                                                                                                        |
|-----------|-----------|----------------------------|-------------------|-------------------------|------------------------------------------------------------------------------------------------------------------------------------------------------------------------------------------------------------------------------------------------------------------------------------------------------------------------------------------------------------------------------------------------------------------------------------------------------------------------------------------------------------------------------------------------------------------------------------------------------------------------------------------------------------------------------------------------------------------------------------------------------------------------------------------------------------------------------------------------------------------------------------------------------------------------------------------------------------------------------------------------------------------------------------------------------------------------------------------------------------------------------------------------------------------------------------------------------------------------------------------------------------------------------------------------------------------------------------------------------------------------------------------------------------------------------------------------------------------------------------------------------------------------------------------------------------------------------------------------------------------------------------------------------------------------------------------------------------------------------------------------------------------------------------------------------------------------------------------------------------------------------------------------------------------------------------------------------------------------------------------------------------------------------------------------------------------------------------------------------------------------------------------------------------------------------------------------------------------------------------------------------------------------------------------------------------------------------------------------------------------------------------------------------------------------------------------------------------------------------------------------------------------------------------------------------------------------------------------------------------------------------------------------------------------------------------------------------------------------------------------------------------------------------------------------------------------------------------------------------------------------------------------------------------------------------------------------------------------------------------------------------------------------------------------------------------------------------------------------------------------------------------------------------------------------------------------------------------------------------------|
|           |           |                            |                   |                         | R.TLMALDMGALIAGAK.Y<br>R.LDEILFHR.L<br>R.AGGSPPAIGEVK.A<br>K.LLAGEILDSSTVK.V<br>K.ALHKFPVAVSGGAQTPPALDND SAR.L<br>K.IKEQLDLAR.L<br>K.FPAVSGGAQTPPALDND SAR.L<br>K.ALQAAVNAK.S<br>K.ALAEFMFGDER.A<br>K.ALLEDEEGMAAQLQR.A<br>R.TKNNPVLIGDPGVGK.T<br>R.IANGDVPDSLKGR.T<br>R.YLQDPLAEK.L<br>K.AHQDVFVNLVQLDDGRLLTDGQGR.V<br>K.YELHHGVNITDSATVAQAQLSDR.Y<br>K.VDEGEGLVFPVPSQI.<br>K.ITLDTLEGAR.N<br>K.AGDSFVIVQR.I<br>R.TADSASAEESYDALK.K<br>R.SHFRPEFLNR.L<br>R.RFQPVYIDEPSVEDTISILR.G<br>R.LLDQAEQLAK.A<br>R.KITLDTLEGAR.N<br>R.IDMSEFMEK.H<br>R.EEVTEDIASVSR.W<br>K.YVEKDAALQR.R<br>R.LSQEHMAPIVDIQVK.R<br>R.IANGDVPDSLK.G<br>K.ELAELEQK.S<br>R.WQNERDK.I<br>R.ILQAMALSDSTDAK.A<br>K.NSDGQIILFIDEMHTLIGAGASEGSDANLLKPALSR.G<br>R.WQNERDKIQAEAK.I<br>R.VVDFTSNTLILITSLNLSGQFLSNLTDQK.V<br>R.TLMALDMGALIAGAK.Y<br>R.MEVESKPEEIEIENLDRR.I<br>R.MEVESKPEEIEIENLDR.R<br>R.LSQEHMAPIVDIQVK.R<br>R.LKAVIDEVK.N<br>R.KELAELEQK.S<br>R.DGKLDPVIGRDEEIRR.T<br>K.SSELTTR.W<br>K.LLAGEILDGSTVKVDEGEGLVFPVPSQI.<br>K.ALLEDEEGMAAQLQR.A<br>K.AGELSYGTIPSLEKQLEEAR.G<br>K.GYDDNIEAVLIVDK.E<br>R.HILSFREFK.L<br>K.GYDDNIEAVLIVDK.E<br>K.EAVSALDETQAISAIDAGNNK.G<br>R.TSNLPLGTYDAIKR.A<br>R.AAALLDEQKPEAK.L<br>R.TEQDNQIAAELEQK.A<br>K.ALSDRIEDLDEGR.L<br>K.ENRTEQDNQIAAELEQK.A<br>K.AADQGEASASATDQQAAGATAEDQVQLGTLK.E<br>R.EPNLALPANSVIEHVDLATPGDVK.A<br>K.DLDDLQDAIKELER.E<br>K.AREQIEMAQALGYATK.K<br>K.EAVSALDETQAISAIDAGNNKGAIDALAR.A<br>R.EQIEMAQALGYATK.K<br>R.TSNLPLGTYDAIKR.A<br>K.GAIDALAR.A<br>K.LVLLNALSTIVTETVPLPIVR.A<br>K.ELERETGGGNAATR.L<br>R.LMEGLASEMVR.T<br>R.ATGKLEILTR.E<br>K.KDLDLQDAIK.E<br>R.RLMEGLASEMVR.T<br>R.IEDLDEGR.L<br>K.DLDDLQDAIK.E<br>K.LEILTR.E<br>R.EQIEMAQALGYATK.D<br>R.AEASVEAAR.V<br>R.EAVQPTKN.<br>R.IEDLDEGRLEAAR.R<br>K.KDLDLQDAIKELER.E<br>K.ALSDRIEDLDEGRLEAAR.R<br>R.VAAKENV.T<br>R.AEASVEAARVAAK.E<br>K.LEILTR.E<br>K.KDLDLQDAIKELERETGGGNAATR.L<br>K.DLDDLQDAIKELERETGGGNAATR.L<br>K.AREQIEMAQALGYATK.D<br>K.AREQIEMAQALGYATK.K<br>K.ADDTGVQPAS.<br>R.AAKADDTGVQPAS.<br>R.DVFTGWITNDPPYR.H<br>R.EKEFDVDEALLEFPASDPFAFTGATIG.<br>R.VQPPDRDSALFAER.Q<br>R.STLQGHRRPOPWYLFPEAR.R<br>R.GSDAPGNWPIR.W<br>K.EVEEQDQGNK.A<br>K.EAETAYDQSR.G<br>R.TRLEADLAAAQK.T<br>R.HPELIDIDSPGAEVSDIDLALLGELQTIK.E<br>R.SLSTMHMGKR.R<br>R.AEIKALLDTPDR.T<br>R.GALIVGAGDPYVELAQAQ.Y<br>R.YAAATGTLTVIDGAGHWAIAERPAGVAAAALR.A<br>R.SWAINAVIESDYR.G<br>K.QAEALFAAHGPDIDVHWDWGALIAQR.V<br>K.GLSFAQDWALDIPK.L<br>R.TLAEHNAVQK.W<br>R.LQADPTIYPIIR.G<br>R.AGEILEEAGLVSAFNR.N<br>R.LTGEIPVPAEGSVLPDSYAFFTTGESR.A<br>R.FFGSEPIKPGYK.I<br>R.ASIAAVLDPEANDYLFVVAR.G<br>K.ALVETPLPSDQFGEGITR.W<br>K.RLFTVGK.Y<br>R.VGDVEQGFNAATDVYENK.A<br>R.AAVEEIVGPGGTTALLYATK.A<br>K.GVDILADAVK.V<br>R.QJANAGHDGAVVAGNLLR.V<br>R.GYLSPYFTNPEK.M<br>R.AQIETTSSDYDREK.L<br>K.ANDKAGDGTATTVLAQAIVR.E<br>R.VTIDKNTTIVDAGDAEAIK.G<br>R.AQIETTSSDYDR.E<br>K.EGVITVEEAK.G<br>K.AMLQDJALTK.G<br>R.STPVSGSSEIAQVGIISANGDVEVGEK.I<br>K.ALEGLKANDDQTR.G<br>K.AAGVIDPTK.V<br>K.MIVELTDPYLIFEK.K<br>K.LENVTLNMLGQAK.R<br>K.I.SNLQSMPLFAVQVSGR.P<br>K.LAGGVAVIK.V<br>K.GEMISEDLGIKLENTLNMLGQAK.R<br>K.DKFENMGAQMLR.E<br>K.MIVELTDPYLIFEK.L<br>R.GIDLAVTK.V<br>K.VGKEGVTVEEAK.G<br>R.KAMLQDAIILTK.G<br>K.SVAAGMNPMDLKR.R<br>K.SVAAGMNPMDLKR.G<br>K.GEMISEDLGIK.L |
| YP_615463 | Sala_0408 | hypothetical protein       | 20.44%            | 3                       |                                                                                                                                                                                                                                                                                                                                                                                                                                                                                                                                                                                                                                                                                                                                                                                                                                                                                                                                                                                                                                                                                                                                                                                                                                                                                                                                                                                                                                                                                                                                                                                                                                                                                                                                                                                                                                                                                                                                                                                                                                                                                                                                                                                                                                                                                                                                                                                                                                                                                                                                                                                                                                                                                                                                                                                                                                                                                                                                                                                                                                                                                                                                                                                                                                    |
| YP_615464 | Sala_0409 | hypothetical protein       | 92.13%            | 36                      |                                                                                                                                                                                                                                                                                                                                                                                                                                                                                                                                                                                                                                                                                                                                                                                                                                                                                                                                                                                                                                                                                                                                                                                                                                                                                                                                                                                                                                                                                                                                                                                                                                                                                                                                                                                                                                                                                                                                                                                                                                                                                                                                                                                                                                                                                                                                                                                                                                                                                                                                                                                                                                                                                                                                                                                                                                                                                                                                                                                                                                                                                                                                                                                                                                    |
| YP_615465 | Sala_0410 | hypothetical protein       | 6.31%             | 2                       |                                                                                                                                                                                                                                                                                                                                                                                                                                                                                                                                                                                                                                                                                                                                                                                                                                                                                                                                                                                                                                                                                                                                                                                                                                                                                                                                                                                                                                                                                                                                                                                                                                                                                                                                                                                                                                                                                                                                                                                                                                                                                                                                                                                                                                                                                                                                                                                                                                                                                                                                                                                                                                                                                                                                                                                                                                                                                                                                                                                                                                                                                                                                                                                                                                    |
| YP_615467 | Sala_0412 | hypothetical protein       | 48.89%            | 5                       |                                                                                                                                                                                                                                                                                                                                                                                                                                                                                                                                                                                                                                                                                                                                                                                                                                                                                                                                                                                                                                                                                                                                                                                                                                                                                                                                                                                                                                                                                                                                                                                                                                                                                                                                                                                                                                                                                                                                                                                                                                                                                                                                                                                                                                                                                                                                                                                                                                                                                                                                                                                                                                                                                                                                                                                                                                                                                                                                                                                                                                                                                                                                                                                                                                    |
| YP_615484 | Sala_0430 | hypothetical protein       | 10.12%            | 4                       |                                                                                                                                                                                                                                                                                                                                                                                                                                                                                                                                                                                                                                                                                                                                                                                                                                                                                                                                                                                                                                                                                                                                                                                                                                                                                                                                                                                                                                                                                                                                                                                                                                                                                                                                                                                                                                                                                                                                                                                                                                                                                                                                                                                                                                                                                                                                                                                                                                                                                                                                                                                                                                                                                                                                                                                                                                                                                                                                                                                                                                                                                                                                                                                                                                    |
| YP_615494 | Sala_0440 | phage integrase            | 7.49%             | 2                       |                                                                                                                                                                                                                                                                                                                                                                                                                                                                                                                                                                                                                                                                                                                                                                                                                                                                                                                                                                                                                                                                                                                                                                                                                                                                                                                                                                                                                                                                                                                                                                                                                                                                                                                                                                                                                                                                                                                                                                                                                                                                                                                                                                                                                                                                                                                                                                                                                                                                                                                                                                                                                                                                                                                                                                                                                                                                                                                                                                                                                                                                                                                                                                                                                                    |
| YP_615500 | Sala_0446 | alpha/beta hydrolase fold  | 41.67%            | 5                       |                                                                                                                                                                                                                                                                                                                                                                                                                                                                                                                                                                                                                                                                                                                                                                                                                                                                                                                                                                                                                                                                                                                                                                                                                                                                                                                                                                                                                                                                                                                                                                                                                                                                                                                                                                                                                                                                                                                                                                                                                                                                                                                                                                                                                                                                                                                                                                                                                                                                                                                                                                                                                                                                                                                                                                                                                                                                                                                                                                                                                                                                                                                                                                                                                                    |
| YP_615502 | Sala_0448 | aminodeoxychorismate lyase | 32.37%            | 6                       |                                                                                                                                                                                                                                                                                                                                                                                                                                                                                                                                                                                                                                                                                                                                                                                                                                                                                                                                                                                                                                                                                                                                                                                                                                                                                                                                                                                                                                                                                                                                                                                                                                                                                                                                                                                                                                                                                                                                                                                                                                                                                                                                                                                                                                                                                                                                                                                                                                                                                                                                                                                                                                                                                                                                                                                                                                                                                                                                                                                                                                                                                                                                                                                                                                    |
| YP_615505 | Sala_0451 | glutamine cyclotransferase | 9.80%             | 2                       |                                                                                                                                                                                                                                                                                                                                                                                                                                                                                                                                                                                                                                                                                                                                                                                                                                                                                                                                                                                                                                                                                                                                                                                                                                                                                                                                                                                                                                                                                                                                                                                                                                                                                                                                                                                                                                                                                                                                                                                                                                                                                                                                                                                                                                                                                                                                                                                                                                                                                                                                                                                                                                                                                                                                                                                                                                                                                                                                                                                                                                                                                                                                                                                                                                    |
| YP_615506 | Sala_0452 | chaperonin GroEL           | 84.28%            | 71                      |                                                                                                                                                                                                                                                                                                                                                                                                                                                                                                                                                                                                                                                                                                                                                                                                                                                                                                                                                                                                                                                                                                                                                                                                                                                                                                                                                                                                                                                                                                                                                                                                                                                                                                                                                                                                                                                                                                                                                                                                                                                                                                                                                                                                                                                                                                                                                                                                                                                                                                                                                                                                                                                                                                                                                                                                                                                                                                                                                                                                                                                                                                                                                                                                                                    |

| Accession | Locus tag | Description               | Sequence coverage | No. peptides identified | List of peptides identified                                                                                                                                                                                                                                                                                                                                                                                                                                                                                                                                                                                                                                                                                                                                                                                                                                                                                                                                                                                                                                                                                                                                                                                                                                                                                                                                                                                                                                                                                                                                                                                                                                                                                                                                                                                                                                                                                                                                                                                                                                                                               |
|-----------|-----------|---------------------------|-------------------|-------------------------|-----------------------------------------------------------------------------------------------------------------------------------------------------------------------------------------------------------------------------------------------------------------------------------------------------------------------------------------------------------------------------------------------------------------------------------------------------------------------------------------------------------------------------------------------------------------------------------------------------------------------------------------------------------------------------------------------------------------------------------------------------------------------------------------------------------------------------------------------------------------------------------------------------------------------------------------------------------------------------------------------------------------------------------------------------------------------------------------------------------------------------------------------------------------------------------------------------------------------------------------------------------------------------------------------------------------------------------------------------------------------------------------------------------------------------------------------------------------------------------------------------------------------------------------------------------------------------------------------------------------------------------------------------------------------------------------------------------------------------------------------------------------------------------------------------------------------------------------------------------------------------------------------------------------------------------------------------------------------------------------------------------------------------------------------------------------------------------------------------------|
|           |           |                           |                   |                         | K.GLEFELDVVEGMQFDR.G<br>K.DNTTIVDGAGDAEAIK.G<br>R.PLLIADIEDIEGEALTLVNR.L<br>K.KLSNLQSMPLILEAVVQSGR.P<br>R.STPVSSSEIAQVGIISANGDVEVGEKIAEAMEK.V<br>R.TALQDAASVAGLLITTEAAVSELPEDK.P<br>K.RGIDLAVTK.V<br>R.IKGVLDLADAVK.V<br>K.VVEDLAKR.S<br>K.DNTTIVDASGDAEAIKGR.V<br>R.ITKDGVSVAK.E<br>R.NVVIDKSFAGPR.I<br>R.NVVIDK.S<br>K.GEMISEDLGIKLENVTNMLGQAK.R<br>R.KAIEIPLR.Q<br>K.GRVEQIR.A<br>R.VTIDKNTTIVDGAGDAEAIKGR.V<br>R.KAMLQDIALTK.G<br>K.SVAAGMNPMDLKR.G<br>K.RVTIDKNTTIVDGAGDAEAIKGR.V<br>K.RVTIDKNTTIVDGAGDAEAIK.G<br>K.MIVELTDPYLLIFEKK.L<br>K.MIVELTDPYLLIFEKK.K<br>K.LSNLQSMPLILEAVVQSGR.P<br>K.LENVTNMLGQAK.R<br>K.KLSNLQSMPLILEAVVQSGR.P<br>K.GLEFELDVVEGMQFDR.G<br>K.GEMISEDLGIKLENVTNMLGQAK.R<br>K.GEMISEDLGIKLENVTNMLGQAK.R<br>K.EIELKDKFENMGAQMLR.E<br>K.EIELKDKFENMGAQMLR.E<br>K.DKFENMGAQMLR.E<br>K.DKFENMGAQMLR.E<br>K.AMLQDIALTK.G<br>R.VGDEVEGFMNAATDVYENLKAAGVIDPTK.V<br>K.VVEDLAKR.S<br>K.SVAAGMNPMDLKR.G<br>K.SVAAGMNPMDLKR.R<br>K.SVAAGMNPMDLKR.R<br>K.IAEAMEK.V<br>K.GEMISEDLGIK.L<br>K.EIELKDKFENMGAQMLR.E<br>K.AIETPQIAANAGHDGAVVAGNLLR.V<br>K.AAGVIDPTKVVR.T<br>K.EKPEGEVSVGTGAR.A<br>R.ADDGKVTPLDVK.A<br>K.TAGGIIIPDTAK.E<br>R.IEAEEKTAGGIIIPDTAK.E<br>K.WSGTEVKVDGEELLIMK.E<br>K.VDGEELLIMKESDILGVIA.<br>K.VDGEELLIMK.E                                                                                                                                                                                                                                                                                                                                                                                                                                                                                                                                                                                                                                                                                                                                                                                                                                                          |
| YP_615507 | Sala_0453 | chaperonin Cpn10          | 86.32%            | 7                       | R.ETGGRPVLLHGLFSSGEVNWIK.F<br>R.LLLGGMGLAGAGWQR.R<br>R.LATIPGTHMSSVTEPALGEAIAAFLTA.<br>R.DVEDLV AHLGLVDFDLGGFSLGAR.T<br>K.RGDDTWLSIQFMK.T<br>R.LATIPGTHMSSVTEPALGEAIAAFLTA.<br>R.VHGSSDAPHDAQHYPPDVLVR.D<br>R.AIAEYETAK.R<br>R.TGLVLPPTTPGAATELNR.I<br>K.VAFLPFGLLIDR.W<br>K.IGENFYSLGMAPLPTDFWK.R<br>R.IATDLQSQYGGK.G<br>R.WGVFDGTIQPADYNK.A<br>K.VPSADKDLGILLR.Q<br>K.WNADDVPIHHELGHNYYQR.A<br>K.YSDVRLSAETK.R<br>K.YGDAVQPK.T<br>K.EIAGSDIEAEMGNLER.T<br>K.ELGFADTGAMWR.S<br>R.YQGVPPAARPAADFADAGAK.Y<br>R.TPVELAEHWTSWHDNVGAPMK.Q<br>R.PADAFDAGAK.Y<br>K.YSDVPLSAETK.R<br>K.AMADYFAPLKK.W<br>K.IWQDMKPLYVALHTYVR.W<br>R.YQGVPPAAR.P<br>R.SGYDMPPEEFAR.L<br>K.LNAMLEMGASKPWPDALEAFTGK.R<br>R.TRYQGVPPAAR.P<br>R.MVAIANAGAK.E<br>K.YHIPGNTPYTR.Y<br>R.TPVELAEHWTSWHDNVGAPMKQDYAR.M<br>R.TPVELAEHWTSWHDNVGAPMK.Q<br>R.SMFTKPADR.E<br>R.INAVGTEK.A<br>R.ILQFQYEAACR.Q<br>R.GTLNGKEIAGSDIEAEMGNLER.T<br>K.WLDEQNK.G<br>K.LNAMLEMGASKPWPDALEAFTGK.R.E<br>K.IGENFYSLGMAPLPTDFWK.R<br>K.ELGFADTGAMWR.S<br>K.DLFDYTVAAQVWVWNTYITEDTDAMAAR.I<br>R.MVAIANAGAK.E<br>R.EVCHASAWNIDNKDDIR.I<br>K.YALEAAK.Y<br>K.LNEKYGDAVQPK.T<br>K.IWQDMKPLYVALHTYVR.W<br>K.AMADYFAPLKK.W<br>R.IAKPIDVEFEAVADPAK.L<br>R.TLVEISEEGWR.E<br>R.IVLEWQASEGEAPNVEGELADADYR.T<br>K.AWIEHGINLR.A<br>R.SFPIEIAADGAGNVR.M<br>K.SFTLYGPVAVGPGDSYR.V<br>K.LVSNVLTDIVPGR.S<br>R.FSQDITGEADKNSAAVPLR.Y<br>R.FIATTVPGMSAASAVQLNGIVAIAK.G<br>K.GYDILAAEQSGETMLIEQPQTGK.S<br>R.FSQDITGEADK.N<br>K.AGEALAAK.G<br>R.LDYGLSLVWLK.D<br>K.GQGPYALQLKPGK.H<br>K.HAELTGTFRDLVGLSLVWLK.D<br>R.FIATTVPGMSAASAVQLNGIVAIAK.G<br>K.SFTLYGPVAVGPGDSYRVEWKL.L<br>R.IDVQELLATR.L<br>R.EHWFALVVVDEAQMFPASASGDVSDTVR.R<br>R.AVAVEPEPEVAAGELLER.I<br>K.TSIEIGTDAAGQDVR.I<br>R.SIGIPELGLSTEA.E<br>R.GLAGALATQR.L<br>R.GHFLGLGPAISR.R<br>K.VPLDLAAR.F<br>R.FGDFYFVSSTER.Y<br>R.ALYETLLGSSAGPR.M<br>R.VLGGVAVAGDAATYPELLDR.L<br>R.HNQDILDIMLPTLR.A<br>R.LGNPVHHVHVAR.G<br>R.GTYPAEQPKR.L<br>R.AATYSPVLPVSPK.S<br>K.SGIVLQVPVTVDAEAGLVSFEDEGETTTHSILR.G<br>K.DLTDGVSQSGK.I<br>R.RAVETLGGAPTR.L<br>R.GQDVPTVLPVTVYLLNLVGMGADASK.E<br>R.YTSGAFDEALK.N<br>R.MGSFIALFGVENTR.R |
| YP_615509 | Sala_0455 | alpha/beta hydrolase fold | 53.60%            | 8                       |                                                                                                                                                                                                                                                                                                                                                                                                                                                                                                                                                                                                                                                                                                                                                                                                                                                                                                                                                                                                                                                                                                                                                                                                                                                                                                                                                                                                                                                                                                                                                                                                                                                                                                                                                                                                                                                                                                                                                                                                                                                                                                           |
| YP_615510 | Sala_0456 | Peptidyl-dipeptidase A    | 65.85%            | 40                      |                                                                                                                                                                                                                                                                                                                                                                                                                                                                                                                                                                                                                                                                                                                                                                                                                                                                                                                                                                                                                                                                                                                                                                                                                                                                                                                                                                                                                                                                                                                                                                                                                                                                                                                                                                                                                                                                                                                                                                                                                                                                                                           |
| YP_615512 | Sala_0458 | hypothetical protein      | 40.00%            | 4                       |                                                                                                                                                                                                                                                                                                                                                                                                                                                                                                                                                                                                                                                                                                                                                                                                                                                                                                                                                                                                                                                                                                                                                                                                                                                                                                                                                                                                                                                                                                                                                                                                                                                                                                                                                                                                                                                                                                                                                                                                                                                                                                           |
| YP_615513 | Sala_0459 | hypothetical protein      | 58.97%            | 13                      |                                                                                                                                                                                                                                                                                                                                                                                                                                                                                                                                                                                                                                                                                                                                                                                                                                                                                                                                                                                                                                                                                                                                                                                                                                                                                                                                                                                                                                                                                                                                                                                                                                                                                                                                                                                                                                                                                                                                                                                                                                                                                                           |
| YP_615515 | Sala_0461 | ATPase                    | 23.98%            | 8                       |                                                                                                                                                                                                                                                                                                                                                                                                                                                                                                                                                                                                                                                                                                                                                                                                                                                                                                                                                                                                                                                                                                                                                                                                                                                                                                                                                                                                                                                                                                                                                                                                                                                                                                                                                                                                                                                                                                                                                                                                                                                                                                           |
| YP_615517 | Sala_0463 | lysyl-tRNA synthetase     | 82.55%            | 33                      |                                                                                                                                                                                                                                                                                                                                                                                                                                                                                                                                                                                                                                                                                                                                                                                                                                                                                                                                                                                                                                                                                                                                                                                                                                                                                                                                                                                                                                                                                                                                                                                                                                                                                                                                                                                                                                                                                                                                                                                                                                                                                                           |

| Accession | Locus tag | Description                                       | Sequence coverage | No. peptides identified | List of peptides identified                                                                                                                                                                                                                                                                                                                                                                                                                                                                                                                                                                                                                                                                                                                                                                                                                                                                                                                                                                                                                                                                                                                                                                                                                                                                                                                                                                                                                                                                                                                                                                                                                                                                                                                                                                                                                                                                                                                                                                                                                                                                                                                                                                                                                                                                                                                                                                                                                                                                                                                                                                                                                                                                                                                                                                                                                                                                                                                                                                                                                                                                                                                                                                                                                                                                                                                      |
|-----------|-----------|---------------------------------------------------|-------------------|-------------------------|--------------------------------------------------------------------------------------------------------------------------------------------------------------------------------------------------------------------------------------------------------------------------------------------------------------------------------------------------------------------------------------------------------------------------------------------------------------------------------------------------------------------------------------------------------------------------------------------------------------------------------------------------------------------------------------------------------------------------------------------------------------------------------------------------------------------------------------------------------------------------------------------------------------------------------------------------------------------------------------------------------------------------------------------------------------------------------------------------------------------------------------------------------------------------------------------------------------------------------------------------------------------------------------------------------------------------------------------------------------------------------------------------------------------------------------------------------------------------------------------------------------------------------------------------------------------------------------------------------------------------------------------------------------------------------------------------------------------------------------------------------------------------------------------------------------------------------------------------------------------------------------------------------------------------------------------------------------------------------------------------------------------------------------------------------------------------------------------------------------------------------------------------------------------------------------------------------------------------------------------------------------------------------------------------------------------------------------------------------------------------------------------------------------------------------------------------------------------------------------------------------------------------------------------------------------------------------------------------------------------------------------------------------------------------------------------------------------------------------------------------------------------------------------------------------------------------------------------------------------------------------------------------------------------------------------------------------------------------------------------------------------------------------------------------------------------------------------------------------------------------------------------------------------------------------------------------------------------------------------------------------------------------------------------------------------------------------------------------|
|           |           |                                                   |                   |                         | K.PGGAPVLFETGYGSPGLPHIGTFNEVLR.T<br>R.AYETLTGGAPTR.L<br>R.LIDNAMAYNR.D<br>K.AVDEVLQMR.G<br>R.LAALPADASADDIQNVVEIGKDEAHGFNDLR.D<br>R.YPEGKPGGAPVLFETGYGSPGLPHIGTFNEVLR.T<br>R.LVAFSDMDGLR.K<br>R.YTSGAFDEALKNVLR.H<br>R.RKPGGEEVAALR.E<br>R.LVAFSDMDGLR.K<br>R.LAALPADASADDIQNVVEIGK.D<br>R.KPEGLIYEMFLDEKGEK.I<br>K.NGLSMEEWLTYSSESLAFYAYREP.K.A<br>R.WVALGVDEMYGKDLTDSGVQSGK.I<br>R.PLTAPDPFGKYESFAHNNAMLR.E<br>R.KVFDNVNPGAMLR.E<br>R.KPEGLIYEMFLDEKGEK.I<br>K.VPDNVNPGAMLR.E<br>K.SKGNLSMEEWLTYSSESLAFYAYR.E<br>K.AVDEVLQMR.G<br>R.ILVTHGDTMVTGR.V<br>K.TVLTGANQFASVR.A<br>R.AVAASDAAR.I<br>R.NAVILAHYQKPEIQDLADFGDSLELSR.K<br>R.MLEMASGTVGK.G<br>R.DLSLGLDLR.A<br>K.ALSDIITSSAETIISQIPPEQK.I<br>R.IEMDEFLR.L<br>K.SFGDTLIVATEPHIHHQELALPEK.T<br>R.HLGGYMNK.K<br>K.GDTLIVATEPHIHHQELALPEK.T<br>R.KAAETDAEVIACGKVF.F<br>R.DMLLWPGCIVHEAFSETELLK.L<br>R.VLVEPQWVDAGQTLAVIDR.S<br>K.VGTVSDAGVSIASGLTNER.V<br>R.VAQADANLAQAEER.A<br>R.VVTLGAFNLVGDVTKVPLQK.S<br>R.VAQQAQAEAR.A<br>R.QVEPGQIVGAGSVLFR.M<br>R.LNIVAPAAGLVLR.Q<br>R.EMPVGVAGEGQVER.V<br>R.VAQADANLAQAEERAEALVSR.G<br>R.LVSGTAEPLLPESAVQSGPEYVVLVKG.D<br>R.GAADAGGEEATVPNTITVIPGR.V<br>R.ATVTPVGTVEIPQVWQVSPVINDMTR.Q<br>R.SVQSQQAASLAQR.V<br>R.GGEMHLAQMAEADLAR.V<br>R.DAANAR.V<br>R.SLDPLDGLLEPQVVR.V<br>R.AYNDVQAIQSR.S<br>R.VVVSQGAAPTELEQTQTR.V<br>R.VNFQSQGGFSGR.D<br>R.SJATENLVPPTS.R.G<br>R.VLGNAGSAFQLGETR.I<br>K.VTDGYAEQR.N<br>R.IATLGDIDQNAK.F<br>R.TEAGSEQAVR.V<br>R.DITFVIGDDPVALER.H<br>R.IEGDIPREIIVNPR.M<br>R.LLSWTLDSK.Q<br>R.IVIGADLAPGLVTGDAQK.K<br>K.KIDALPSIK.T<br>K.AVAEIGFAGGPTLR.R<br>R.RIVIGADLAPGLVTGDAQK.K<br>R.MQSYGLTASVQQLR.Q<br>K.DRPVTSIEWER.S<br>R.MDLAELGVTTAALSQTR.I<br>K.VDFTLFTR.T<br>K.GASDVVHDETMK.K<br>R.MDLAELGVTTAALSQTR.I<br>K.MAIPDAK.V<br>R.FLITNLLPR.L<br>R.IIADGLGALDQQR.L<br>R.ELDVAPLGGALQALAEGR.H<br>R.WLDGLWEQGR.A<br>K.TITDRLENAGDDLQYR.I<br>R.LENAVGGDLQYR.I<br>K.LISEAVDETHPLR.L<br>R.FTGLDESISR.I<br>K.TLELNEHLIHMVHNSNAIVR.F<br>K.MALDLQHDPEVK.A<br>R.ADSIAFGDETVLAALR.T<br>R.NAADAASVALR.G<br>R.YEALQQLHDLTVAASVSGK.D<br>R.WYEQAGTR.L<br>R.AIEDGAGIDLQFR.R<br>R.GFSAPVIVDFAR.A<br>R.TTDGAPALLR.G<br>R.APGELAWLAHDDPPFAR.Y<br>R.ALNGALTNQAAPHQADGAGYR.L<br>R.GDYRPPPEWQVDFVALDFALGIEETR.V<br>K.DRDPQTVIDAVAQTLVSR.A<br>R.GVALAYLAATGMDAAALAFR.V<br>R.FAVRPALSVNR.G<br>R.VFSQADGIMTR.Q<br>R.VDGEVWINDWR.M<br>R.AILDGAAPPATDLR.G<br>R.ALAQHPDFTLTPNR.V<br>R.VSAALSVQR.T<br>R.ILAQGLSR.D<br>R.WDEEYGR.E<br>R.LAFAFMDGSAHLADTLVTSIGATQR.I<br>R.AHALDIFQR.Y<br>R.AAQFPEDAGPLAHPDPFSFQESINFYATVYNK.G<br>R.QAALATLAHSDSER.A<br>R.MDGSLLVLDGER.T<br>R.LIADLVIALDPK.N<br>R.ITFHPDRPDVLSR.Y<br>R.GDGLTFAVR.V<br>K.GLNIFNTR.Y<br>R.YRDNPLVLDK.W<br>R.LALQAAGAASEWR.A<br>R.DWFQLSK.E<br>R.AADPAFVAEVLVLPSEAFIGDQMLTVDPDAIR.R<br>K.WFQVQAVSVRPTVDVAVR.A<br>K.ILSLVEAAGQWSLDIVQVTPPTPGPEK.Q<br>R.IPVQDDASIAVQDAQWVEAPQR.L<br>R.TAADAATLTLIPTAPQK.L<br>R.SNEALVYQAMLVSAGGK.T<br>R.LVSETVAAR.T<br>K.VEAKVYGEALTR.A<br>R.TTRIPVQDDASIAVQDAQWVEAPQR.L<br>R.LAELADDENQASIR.G<br>K.GAQVQFSGVPSQVQR.E<br>R.VGGELIINTAPQLQR.L<br>R.GILNNVEASTAILAR.N<br>K.TLEGAIDARPLK.T<br>R.TSASLSLTDKLDQAGAGAVLGSK.L<br>R.IAIQQTGIAAEQIGNLAAAQGTIDR.N<br>R.EIALWPPDPQFVR.V<br>K.TFSETTIPEANALIR.D<br>R.VRIEVNEGVPVLTGTAALLEGVGTGVSQISLDGAVK.G<br>R.ALALDPAFLDPTAGLDPGAAK.F<br>R.SIGLQTFAGEIEVYK.T<br>R.LLDLASDKSEYR.V<br>R.ADFHESEGADGVEVR.F<br>R.FADEAVATPSR.G |
| YP_615518 | Sala_0464 | asparaginase                                      | 24.38%            | 3                       |                                                                                                                                                                                                                                                                                                                                                                                                                                                                                                                                                                                                                                                                                                                                                                                                                                                                                                                                                                                                                                                                                                                                                                                                                                                                                                                                                                                                                                                                                                                                                                                                                                                                                                                                                                                                                                                                                                                                                                                                                                                                                                                                                                                                                                                                                                                                                                                                                                                                                                                                                                                                                                                                                                                                                                                                                                                                                                                                                                                                                                                                                                                                                                                                                                                                                                                                                  |
| YP_615521 | Sala_0467 | quinolinate synthetase complex, A subunit         | 46.50%            | 10                      |                                                                                                                                                                                                                                                                                                                                                                                                                                                                                                                                                                                                                                                                                                                                                                                                                                                                                                                                                                                                                                                                                                                                                                                                                                                                                                                                                                                                                                                                                                                                                                                                                                                                                                                                                                                                                                                                                                                                                                                                                                                                                                                                                                                                                                                                                                                                                                                                                                                                                                                                                                                                                                                                                                                                                                                                                                                                                                                                                                                                                                                                                                                                                                                                                                                                                                                                                  |
| YP_615525 | Sala_0471 | secretion protein HlyD                            | 63.86%            | 15                      |                                                                                                                                                                                                                                                                                                                                                                                                                                                                                                                                                                                                                                                                                                                                                                                                                                                                                                                                                                                                                                                                                                                                                                                                                                                                                                                                                                                                                                                                                                                                                                                                                                                                                                                                                                                                                                                                                                                                                                                                                                                                                                                                                                                                                                                                                                                                                                                                                                                                                                                                                                                                                                                                                                                                                                                                                                                                                                                                                                                                                                                                                                                                                                                                                                                                                                                                                  |
| YP_615526 | Sala_0472 | acriflavin resistance protein                     | 24.78%            | 23                      |                                                                                                                                                                                                                                                                                                                                                                                                                                                                                                                                                                                                                                                                                                                                                                                                                                                                                                                                                                                                                                                                                                                                                                                                                                                                                                                                                                                                                                                                                                                                                                                                                                                                                                                                                                                                                                                                                                                                                                                                                                                                                                                                                                                                                                                                                                                                                                                                                                                                                                                                                                                                                                                                                                                                                                                                                                                                                                                                                                                                                                                                                                                                                                                                                                                                                                                                                  |
| YP_615527 | Sala_0473 | protein of unknown function DUF445                | 30.88%            | 10                      |                                                                                                                                                                                                                                                                                                                                                                                                                                                                                                                                                                                                                                                                                                                                                                                                                                                                                                                                                                                                                                                                                                                                                                                                                                                                                                                                                                                                                                                                                                                                                                                                                                                                                                                                                                                                                                                                                                                                                                                                                                                                                                                                                                                                                                                                                                                                                                                                                                                                                                                                                                                                                                                                                                                                                                                                                                                                                                                                                                                                                                                                                                                                                                                                                                                                                                                                                  |
| YP_615528 | Sala_0474 | NAD-dependent epimerase/dehydratase               | 10.69%            | 2                       |                                                                                                                                                                                                                                                                                                                                                                                                                                                                                                                                                                                                                                                                                                                                                                                                                                                                                                                                                                                                                                                                                                                                                                                                                                                                                                                                                                                                                                                                                                                                                                                                                                                                                                                                                                                                                                                                                                                                                                                                                                                                                                                                                                                                                                                                                                                                                                                                                                                                                                                                                                                                                                                                                                                                                                                                                                                                                                                                                                                                                                                                                                                                                                                                                                                                                                                                                  |
| YP_615529 | Sala_0475 | Peptidase M1, alanyl aminopeptidase               | 58.91%            | 33                      |                                                                                                                                                                                                                                                                                                                                                                                                                                                                                                                                                                                                                                                                                                                                                                                                                                                                                                                                                                                                                                                                                                                                                                                                                                                                                                                                                                                                                                                                                                                                                                                                                                                                                                                                                                                                                                                                                                                                                                                                                                                                                                                                                                                                                                                                                                                                                                                                                                                                                                                                                                                                                                                                                                                                                                                                                                                                                                                                                                                                                                                                                                                                                                                                                                                                                                                                                  |
| YP_615532 | Sala_0478 | hypothetical protein                              | 42.21%            | 6                       |                                                                                                                                                                                                                                                                                                                                                                                                                                                                                                                                                                                                                                                                                                                                                                                                                                                                                                                                                                                                                                                                                                                                                                                                                                                                                                                                                                                                                                                                                                                                                                                                                                                                                                                                                                                                                                                                                                                                                                                                                                                                                                                                                                                                                                                                                                                                                                                                                                                                                                                                                                                                                                                                                                                                                                                                                                                                                                                                                                                                                                                                                                                                                                                                                                                                                                                                                  |
| YP_615533 | Sala_0479 | Mammalian cell entry related                      | 61.02%            | 10                      |                                                                                                                                                                                                                                                                                                                                                                                                                                                                                                                                                                                                                                                                                                                                                                                                                                                                                                                                                                                                                                                                                                                                                                                                                                                                                                                                                                                                                                                                                                                                                                                                                                                                                                                                                                                                                                                                                                                                                                                                                                                                                                                                                                                                                                                                                                                                                                                                                                                                                                                                                                                                                                                                                                                                                                                                                                                                                                                                                                                                                                                                                                                                                                                                                                                                                                                                                  |
| YP_615534 | Sala_0480 | ABC transporter related                           | 14.73%            | 2                       |                                                                                                                                                                                                                                                                                                                                                                                                                                                                                                                                                                                                                                                                                                                                                                                                                                                                                                                                                                                                                                                                                                                                                                                                                                                                                                                                                                                                                                                                                                                                                                                                                                                                                                                                                                                                                                                                                                                                                                                                                                                                                                                                                                                                                                                                                                                                                                                                                                                                                                                                                                                                                                                                                                                                                                                                                                                                                                                                                                                                                                                                                                                                                                                                                                                                                                                                                  |
| YP_615535 | Sala_0481 | protein of unknown function DUF140                | 7.61%             | 2                       |                                                                                                                                                                                                                                                                                                                                                                                                                                                                                                                                                                                                                                                                                                                                                                                                                                                                                                                                                                                                                                                                                                                                                                                                                                                                                                                                                                                                                                                                                                                                                                                                                                                                                                                                                                                                                                                                                                                                                                                                                                                                                                                                                                                                                                                                                                                                                                                                                                                                                                                                                                                                                                                                                                                                                                                                                                                                                                                                                                                                                                                                                                                                                                                                                                                                                                                                                  |
| YP_615536 | Sala_0482 | HAD-superfamily subfamily IB, PSPase-like protein | 15.48%            | 3                       |                                                                                                                                                                                                                                                                                                                                                                                                                                                                                                                                                                                                                                                                                                                                                                                                                                                                                                                                                                                                                                                                                                                                                                                                                                                                                                                                                                                                                                                                                                                                                                                                                                                                                                                                                                                                                                                                                                                                                                                                                                                                                                                                                                                                                                                                                                                                                                                                                                                                                                                                                                                                                                                                                                                                                                                                                                                                                                                                                                                                                                                                                                                                                                                                                                                                                                                                                  |



| Accession | Locus tag | Description                                    | Sequence coverage | No. peptides identified | List of peptides identified                                                                                                                                                                                                                                                                                                                                                                                                                                                                                                                                                                                                                                                                                                                                                                                                                                                                                                                                                                                                                                                                                                                                                                                                                                                                                                                                                                                                                                                                                                                                                                                                                                                                                                                                                                                                                                                                                                                                                                                                                                                                                                                                                                                                                                                                                                                                                                                                                                                                                                                                                                                                                                                                                                                                                                                                                                                                                                                                                                                                                                                                                                                                                                                                                                                                                                                           |
|-----------|-----------|------------------------------------------------|-------------------|-------------------------|-------------------------------------------------------------------------------------------------------------------------------------------------------------------------------------------------------------------------------------------------------------------------------------------------------------------------------------------------------------------------------------------------------------------------------------------------------------------------------------------------------------------------------------------------------------------------------------------------------------------------------------------------------------------------------------------------------------------------------------------------------------------------------------------------------------------------------------------------------------------------------------------------------------------------------------------------------------------------------------------------------------------------------------------------------------------------------------------------------------------------------------------------------------------------------------------------------------------------------------------------------------------------------------------------------------------------------------------------------------------------------------------------------------------------------------------------------------------------------------------------------------------------------------------------------------------------------------------------------------------------------------------------------------------------------------------------------------------------------------------------------------------------------------------------------------------------------------------------------------------------------------------------------------------------------------------------------------------------------------------------------------------------------------------------------------------------------------------------------------------------------------------------------------------------------------------------------------------------------------------------------------------------------------------------------------------------------------------------------------------------------------------------------------------------------------------------------------------------------------------------------------------------------------------------------------------------------------------------------------------------------------------------------------------------------------------------------------------------------------------------------------------------------------------------------------------------------------------------------------------------------------------------------------------------------------------------------------------------------------------------------------------------------------------------------------------------------------------------------------------------------------------------------------------------------------------------------------------------------------------------------------------------------------------------------------------------------------------------------|
|           |           |                                                |                   |                         | R.ASMSLIAGLAAEGTTEVNR.V<br>K.ASEMEATLAALR.E<br>R.ATLTLSTVAPYDIVRK<br>R.MGCDIQVK.G<br>R.LADVDFGHLNLQGCSTTIEGRSPDFGR.V<br>R.EAGATVEETK.G<br>R.ATLTLSTVAPYDIVRK.M<br>K.NAALLPCALLTDEPLTR.N<br>K.LQAVGADIER.I<br>R.LVQNTAEAVAR.G<br>R.GAIVAEDEGLDDYDVAWR.A<br>R.LNHPFPVNTLLMR.G<br>K.LTNDSPFAPISNR.V<br>K.AFDAAVAQTSK.T<br>K.LAEAEVFNKANLEALVESGK.I<br>K.AFEARLETAARVATPAPVAPTAAPAVAVAPT.K<br>K.GMETLQGEVAFAR.K<br>K.LAEAEVFNK.A<br>K.VRAEALTADFNEK.A<br>K.ANLEALVESGK.I<br>R.AEALTADFNEK.A<br>R.KSFEDTTAALK.G<br>K.SFEDTTAALKGYTAVK.S<br>K.SFEDTTAALK.G<br>K.KAFDAVAQTSK.T<br>R.AEALTADFNEKAK.E<br>K.LYAEENSK.A<br>K.LYAEENSK.V<br>R.FADPDWTTNPVALIR.Q<br>R.QTYGLLAEQLATTR.N<br>R.NSAANLDFPASPWLQNPQTQLWAEQSTK.M<br>K.YQYWTGDNDAVTLDDFIAGATETK.G<br>K.DVFAVPLVIFPPWINR.F<br>R.FYILDLPQK.S<br>K.VHETDLVQLQYDPATK.D<br>K.IATPAYQAGREDHIAPAASVWR.M<br>K.LFVDDAYLALLQLSAPGYLDGR.Y<br>R.AQQMMLDVLGQANQR.N<br>K.GLGHMLSDLSR.G<br>R.KAIEDAPGR.Y<br>K.NMAEALSPSNLAITNPEVIK.R<br>K.MWEQGAFAWASLATLQPSLTPDADAR.Q<br>R.QQLSHVDPDAFEVGNIAITTPGK.V<br>R.NMQGIDEQAR.A<br>K.NMAEALSPSNLAITNPEVIK.R<br>K.GSWMPPHWAGWIAAQDDK.K<br>K.WATEQGLTFVFNWSK.S<br>K.SADASMSEIVWDDYVSAQVDAIOTVR.D<br>R.YMAATFNLSR.G<br>R.TFLLAGSGHAGVNNPAAAGK.Y<br>K.SATFLTAQVDFELAGDLK.L<br>R.KPDHAGYSQSK.G<br>R.AGVWDIPSPPASMFAPLPPALR.E<br>K.VAVAPGVGYGEDGEGVIR.I<br>R.PSILVYVNSPTAEAVDLAFYER.L<br>K.ENKWVWLSLAYSELYDGNPTPSILQVPGAK.D<br>R.AMAFTVPRPSILVYVNSPTAEAVDLAFYER.L<br>R.LPPYVIAEVNAMR.A<br>R.IAMVENEQR.I<br>R.FNVDLPESEVVMTGSK.E<br>K.FLAMHGVNTPSIAAGGAG.<br>R.SVPTTPDENYWR.A<br>R.RAQANYGR.R<br>K.VVWVWLSLAYSELYDGNPTPSILQVPGAK.D<br>K.SYLDYGAFTPQAACAALNGPQDIVEK.N<br>K.EGLASLATATGQDGVVLPAPNSYPHFTGFIAGATIR.S<br>K.LANWLVDAFGR.G<br>R.FADDLNWIDAAR.A<br>R.AADGFVVTGEYNGPQGLK.N<br>R.IGHAFDGDGKPTDGDGVR.L<br>R.GDTELDLAR.A<br>R.TILVLSYR.R<br>R.VGSGPFPTELEDETGR.L<br>R.EIADYVLEYQPVWK.R<br>R.FQGGHNAGHTLVGEQVYK.L<br>K.LDVLDFDTR.I<br>K.LDLYFPAHAADQAAVEPIYEMDGHWESTAGAR.S<br>R.DLDALRETAAGAK.I<br>K.LSLLPSGIVTGLSIIIGNVLPWALRDITK.L<br>R.SYADLPAQAIK.Y<br>K.IVDWLASR.A<br>R.AGFGEPPIRDK.L<br>R.GHEFTVTGR.K<br>R.VQELIETPIALVSTSPER.E<br>R.GIGPAYEDK.V<br>R.VQELIETPIALVSTSPEREDTILIRDPFSD.<br>R.VCDLAHLHDLEPQLDR.L<br>R.QSCAVSGVTGIALTK.L<br>R.LTAHHDLAR.A<br>R.VQELIETPIALVSTSPEREDTILIR.D<br>R.QGVVEINADNFAIADNCALLPFRH.D<br>R.GIGPAYEDKVGR.R<br>R.EDTILIRDPFSD.<br>R.CGWFDVLR.Q<br>R.NLIGFYDAEIVGFER.F<br>R.LQLFSAPTPNGVK.A<br>K.IPATYDPGGGGKPLALFESGAILLYADK.S<br>R.LLGLVDDR.L<br>R.DRYAAESAR.L<br>K.SGQFLSPDPAAR.Y<br>R.ASAVIAEGEVNQLSAQR.R<br>K.IAAVVAERDEATEAALDAYGR.N<br>K.SALTEAVAFAR.A<br>K.TANVWVNSASVLDGDFLFSR.A<br>R.RIETSEDQYLAIIAK.T<br>R.AVDAIGGFR.A<br>K.TSDEDLVYATSLLR.K<br>R.KHDTIADTLAR.A<br>R.IETSEDQYLAIIAK.T<br>K.VTLPVILAYR.G<br>R.NLGIAPQLVDDAIDYVSDAETMGK.G<br>R.NLGIAPQLVDDAIDYVSDAETMGK.G<br>R.GTVPSLDPMMLVAADMNEVNAVILDR.M<br>K.TAELFAAACK.I<br>K.LAAVEFHHTATLHDDVDK.S<br>K.LAAGAGEAAPR.S<br>R.RLADALMAMLDWPAR.Q<br>R.SLGGWIATAWPDR.V<br>R.LQAIGALGEDGR.I<br>R.GVDVEARLAR.W<br>R.ASQASATQR.A<br>R.WMLEFAPAEAR.K<br>R.LSFASREEAVAYAEK.Y<br>R.KPDLPMGWAGSGDTQR.Q<br>R.ASEQAGVAR.E<br>R.EAASEYAK.G<br>R.ARAATEDLAR.A<br>R.AKASELAEK.T<br>K.QPLALVAGAVAGALLGSLPK.G<br>K.ARIQEGYGR.A<br>R.FRADATDEGAGQVEENDEAVQ.<br>R.ADATDEGAGQVEENDEAVQ.<br>K.AALHPAALLDR.G<br>R.TKVDDAAHAYR.Q<br>R.SFDGISHGYAPDARPATSEPVLDQIAR.D<br>R.DVVENLSATAK.A<br>R.PATSEPVLDQIAR.D |
| YP_615554 | Sala_0500 | DSBA oxidoreductase                            | 22.39%            | 3                       |                                                                                                                                                                                                                                                                                                                                                                                                                                                                                                                                                                                                                                                                                                                                                                                                                                                                                                                                                                                                                                                                                                                                                                                                                                                                                                                                                                                                                                                                                                                                                                                                                                                                                                                                                                                                                                                                                                                                                                                                                                                                                                                                                                                                                                                                                                                                                                                                                                                                                                                                                                                                                                                                                                                                                                                                                                                                                                                                                                                                                                                                                                                                                                                                                                                                                                                                                       |
| YP_615558 | Sala_0504 | Phasin                                         | 65.73%            | 16                      |                                                                                                                                                                                                                                                                                                                                                                                                                                                                                                                                                                                                                                                                                                                                                                                                                                                                                                                                                                                                                                                                                                                                                                                                                                                                                                                                                                                                                                                                                                                                                                                                                                                                                                                                                                                                                                                                                                                                                                                                                                                                                                                                                                                                                                                                                                                                                                                                                                                                                                                                                                                                                                                                                                                                                                                                                                                                                                                                                                                                                                                                                                                                                                                                                                                                                                                                                       |
| YP_615559 | Sala_0505 | Poly(R)-hydroxyalkanoic acid synthase, class I | 67.12%            | 23                      |                                                                                                                                                                                                                                                                                                                                                                                                                                                                                                                                                                                                                                                                                                                                                                                                                                                                                                                                                                                                                                                                                                                                                                                                                                                                                                                                                                                                                                                                                                                                                                                                                                                                                                                                                                                                                                                                                                                                                                                                                                                                                                                                                                                                                                                                                                                                                                                                                                                                                                                                                                                                                                                                                                                                                                                                                                                                                                                                                                                                                                                                                                                                                                                                                                                                                                                                                       |
| YP_615560 | Sala_0506 | aminotransferase, class I and II               | 64.53%            | 15                      |                                                                                                                                                                                                                                                                                                                                                                                                                                                                                                                                                                                                                                                                                                                                                                                                                                                                                                                                                                                                                                                                                                                                                                                                                                                                                                                                                                                                                                                                                                                                                                                                                                                                                                                                                                                                                                                                                                                                                                                                                                                                                                                                                                                                                                                                                                                                                                                                                                                                                                                                                                                                                                                                                                                                                                                                                                                                                                                                                                                                                                                                                                                                                                                                                                                                                                                                                       |
| YP_615563 | Sala_0509 | NADPH-dependent FMN reductase                  | 42.86%            | 6                       |                                                                                                                                                                                                                                                                                                                                                                                                                                                                                                                                                                                                                                                                                                                                                                                                                                                                                                                                                                                                                                                                                                                                                                                                                                                                                                                                                                                                                                                                                                                                                                                                                                                                                                                                                                                                                                                                                                                                                                                                                                                                                                                                                                                                                                                                                                                                                                                                                                                                                                                                                                                                                                                                                                                                                                                                                                                                                                                                                                                                                                                                                                                                                                                                                                                                                                                                                       |
| YP_615564 | Sala_0510 | Adenylosuccinate synthase                      | 69.93%            | 22                      |                                                                                                                                                                                                                                                                                                                                                                                                                                                                                                                                                                                                                                                                                                                                                                                                                                                                                                                                                                                                                                                                                                                                                                                                                                                                                                                                                                                                                                                                                                                                                                                                                                                                                                                                                                                                                                                                                                                                                                                                                                                                                                                                                                                                                                                                                                                                                                                                                                                                                                                                                                                                                                                                                                                                                                                                                                                                                                                                                                                                                                                                                                                                                                                                                                                                                                                                                       |
| YP_615566 | Sala_0512 | glutathione S-transferase-like protein         | 38.43%            | 6                       |                                                                                                                                                                                                                                                                                                                                                                                                                                                                                                                                                                                                                                                                                                                                                                                                                                                                                                                                                                                                                                                                                                                                                                                                                                                                                                                                                                                                                                                                                                                                                                                                                                                                                                                                                                                                                                                                                                                                                                                                                                                                                                                                                                                                                                                                                                                                                                                                                                                                                                                                                                                                                                                                                                                                                                                                                                                                                                                                                                                                                                                                                                                                                                                                                                                                                                                                                       |
| YP_615568 | Sala_0514 | Trans-hexaprenyltransferase                    | 64.09%            | 15                      |                                                                                                                                                                                                                                                                                                                                                                                                                                                                                                                                                                                                                                                                                                                                                                                                                                                                                                                                                                                                                                                                                                                                                                                                                                                                                                                                                                                                                                                                                                                                                                                                                                                                                                                                                                                                                                                                                                                                                                                                                                                                                                                                                                                                                                                                                                                                                                                                                                                                                                                                                                                                                                                                                                                                                                                                                                                                                                                                                                                                                                                                                                                                                                                                                                                                                                                                                       |
| YP_615570 | Sala_0516 | ATP-dependent helicase HrpB                    | 8.52%             | 6                       |                                                                                                                                                                                                                                                                                                                                                                                                                                                                                                                                                                                                                                                                                                                                                                                                                                                                                                                                                                                                                                                                                                                                                                                                                                                                                                                                                                                                                                                                                                                                                                                                                                                                                                                                                                                                                                                                                                                                                                                                                                                                                                                                                                                                                                                                                                                                                                                                                                                                                                                                                                                                                                                                                                                                                                                                                                                                                                                                                                                                                                                                                                                                                                                                                                                                                                                                                       |
| YP_615571 | Sala_0517 | ETC complex I subunit conserved region         | 45.65%            | 3                       |                                                                                                                                                                                                                                                                                                                                                                                                                                                                                                                                                                                                                                                                                                                                                                                                                                                                                                                                                                                                                                                                                                                                                                                                                                                                                                                                                                                                                                                                                                                                                                                                                                                                                                                                                                                                                                                                                                                                                                                                                                                                                                                                                                                                                                                                                                                                                                                                                                                                                                                                                                                                                                                                                                                                                                                                                                                                                                                                                                                                                                                                                                                                                                                                                                                                                                                                                       |
| YP_615573 | Sala_0519 | hypothetical protein                           | 58.47%            | 6                       |                                                                                                                                                                                                                                                                                                                                                                                                                                                                                                                                                                                                                                                                                                                                                                                                                                                                                                                                                                                                                                                                                                                                                                                                                                                                                                                                                                                                                                                                                                                                                                                                                                                                                                                                                                                                                                                                                                                                                                                                                                                                                                                                                                                                                                                                                                                                                                                                                                                                                                                                                                                                                                                                                                                                                                                                                                                                                                                                                                                                                                                                                                                                                                                                                                                                                                                                                       |
| YP_615574 | Sala_0520 | hypothetical protein                           | 34.65%            | 4                       |                                                                                                                                                                                                                                                                                                                                                                                                                                                                                                                                                                                                                                                                                                                                                                                                                                                                                                                                                                                                                                                                                                                                                                                                                                                                                                                                                                                                                                                                                                                                                                                                                                                                                                                                                                                                                                                                                                                                                                                                                                                                                                                                                                                                                                                                                                                                                                                                                                                                                                                                                                                                                                                                                                                                                                                                                                                                                                                                                                                                                                                                                                                                                                                                                                                                                                                                                       |
| YP_615575 | Sala_0521 | hypothetical protein                           | 32.21%            | 4                       |                                                                                                                                                                                                                                                                                                                                                                                                                                                                                                                                                                                                                                                                                                                                                                                                                                                                                                                                                                                                                                                                                                                                                                                                                                                                                                                                                                                                                                                                                                                                                                                                                                                                                                                                                                                                                                                                                                                                                                                                                                                                                                                                                                                                                                                                                                                                                                                                                                                                                                                                                                                                                                                                                                                                                                                                                                                                                                                                                                                                                                                                                                                                                                                                                                                                                                                                                       |

| Accession | Locus tag | Description                             | Sequence coverage | No. peptides identified | List of peptides identified                                                                                                                                                                                                                                                                                                                                                                                                                                                                                                                                                                                                                                                                                                                                                                                                                                                                                                                                                                                                                                                                                                                                                                                                                                                                                                                                                                                                                                                                                                                                                                                                                                                                                                                                                                                                                                                                                                                                                                                                                                                                                                                                                                                                                                                                                                                                                                                                                                                                                                                                                                                                                                                                                                                                                                 |
|-----------|-----------|-----------------------------------------|-------------------|-------------------------|---------------------------------------------------------------------------------------------------------------------------------------------------------------------------------------------------------------------------------------------------------------------------------------------------------------------------------------------------------------------------------------------------------------------------------------------------------------------------------------------------------------------------------------------------------------------------------------------------------------------------------------------------------------------------------------------------------------------------------------------------------------------------------------------------------------------------------------------------------------------------------------------------------------------------------------------------------------------------------------------------------------------------------------------------------------------------------------------------------------------------------------------------------------------------------------------------------------------------------------------------------------------------------------------------------------------------------------------------------------------------------------------------------------------------------------------------------------------------------------------------------------------------------------------------------------------------------------------------------------------------------------------------------------------------------------------------------------------------------------------------------------------------------------------------------------------------------------------------------------------------------------------------------------------------------------------------------------------------------------------------------------------------------------------------------------------------------------------------------------------------------------------------------------------------------------------------------------------------------------------------------------------------------------------------------------------------------------------------------------------------------------------------------------------------------------------------------------------------------------------------------------------------------------------------------------------------------------------------------------------------------------------------------------------------------------------------------------------------------------------------------------------------------------------|
| YP_615576 | Sala_0522 | hypothetical protein                    | 72.96%            | 19                      | K.AELALIEAR.G<br>R.SAAATVAGLASTLDKK.D<br>R.LLEDSAGTVDTK.F<br>K.DLDELAASTR.D<br>K.AAEAVGSLAR.L<br>K.NPAIIVGAATVIGFVLAR.M<br>R.SAAATVAGLASTLDK.K<br>R.LLEDSAGTVDTKFK.Q<br>R.DTIKSEASK.K<br>K.DKAAEAVGSLAR.L<br>K.KNPAIIVGAATVIGFVLAR.M<br>R.DTIKSEASK.A<br>K.FGKQYGDYAR.S<br>K.AASLKQEAALK.K<br>R.MLKGGSND.<br>R.DQLAVTR.D<br>K.SEASKKAASLKQEAALK.K<br>K.QEAALK.Q<br>K.EHPIRDQLAVTR.D<br>K.AASLKQEAALK.Q                                                                                                                                                                                                                                                                                                                                                                                                                                                                                                                                                                                                                                                                                                                                                                                                                                                                                                                                                                                                                                                                                                                                                                                                                                                                                                                                                                                                                                                                                                                                                                                                                                                                                                                                                                                                                                                                                                                                                                                                                                                                                                                                                                                                                                                                                                                                                                                      |
| YP_615577 | Sala_0523 | Phosphopyruvate hydratase               | 87.50%            | 26                      | R.DALDFIAASVDQAGFK.L<br>K.GLATAVGDEGGFAPNLASTR.D<br>R.NKYEISGEGLSLSPQMAEYLAALVK.D<br>R.LGANILGVSLAAAK.A<br>R.LEQGIKGLANSLVK.V<br>K.AVAAVNGDIAEALVGLDAEDQR.E<br>R.GNPTVEVDLLEDGSFGR.A<br>R.AAVPSGASTGAHEAVELR.D<br>K.YEISGEGLSLSPQMAEYLAALVK.D<br>K.VNQIGTSETLDAVDMAHR.A<br>R.IEELGDMAR.Y<br>R.WGSEIFHTLKK.G<br>R.WGSEIFHTLKK.K<br>K.DGLANSLVK.V<br>K.SIEDGMSDDFAGWK.A<br>K.YEISGEGLSLSPQMAEYLAALVKDYPIK.S<br>K.AVAAVNGDIAEALVGLDAEDQREIDMAMIDLGTGPNK.S<br>R.TLPVPMNMIINGEGHADNPIDVQEFMIMPVAGSIAEAVR.W<br>R.YSAVMSHR.S<br>R.EIDMAMIDLGTGPNK.S<br>R.YVGVSAAR.T<br>R.SGETEDATIADLAVATNGCQIK.T<br>R.IEELGDMAR.Y<br>K.SIEDGMSDDFAGWK.A<br>K.LGTDVVLALDCAATEFFR.N<br>K.ALTDLGGTCTQLVGGDDLVFNPAR.L<br>R.EGRDPVVPYDTPQLEK.F<br>R.GAAEAALWEVR.A<br>R.ASAEDQLYR.R<br>K.KVAATPAPASNR.E<br>R.SREEVQAVR.D<br>K.LPIFVNIENQYAMGTSVNR.A<br>R.LIPGMQVDSMDLAVR.G<br>R.DHGHMLAYGIDPK.V<br>K.LMEGAGIGEDR.I<br>K.VIMAELTR.A<br>R.AIVAESADFAESAPEPDLSELYTDVLEQY.<br>R.GPVLMEK.T<br>K.FYGGHGLVGAQVSLGTGLAFAHK.Y<br>R.DKSDAIEHLK.K<br>K.GGSMHMFVSEHK.F<br>K.YRGGGVAMAYFGDGAANQGQVYESFNMAELWK.L<br>R.YRGHMSDPAK.Y<br>R.DPVYDTPQLEK.F<br>K.KLMEGAGIGEDR.I<br>R.GDGGVAMAYFGDGAANQGQVYESFNMAELWK.L<br>K.VAATPAPASNR.E<br>R.RGESFR.I<br>R.IKIDKIEIR.A<br>R.DKSDAIEHLK.L<br>K.VIMAELTR.A<br>K.LPIFVNIENQYAMGTSVNR.A<br>K.LMEGAGIGEDR.I<br>K.GGSMHMFVSEHK.F<br>R.GPVLMEK.T<br>R.GHMSDPAK.Y<br>K.LMEGAGIGEDRIK.D<br>K.DSVITYR.D<br>R.TEDPVFLENELLYGR.S<br>R.SFEVDPDVFVPIGK.A<br>R.TLRPLDTATVLSLKK.K<br>R.VGAQHSQNYGPWYASVPLVLIAPYDAADAK.G<br>K.VTQQLLEFGAR.R<br>R.ASDPAIPEGTAMVK.L<br>R.VFVMGEEVAEYQAYK.V<br>R.EALRDAMAEEMR.R<br>K.TNYMSGGQMR.C<br>K.AAIRTEDPVFLENELLYGR.S<br>R.VCNEDVPLPYANNLEK.A<br>R.TLRPLDTATVLSLKK.T<br>R.FGAHLFALSGETER.G<br>R.SEGLLLR.I<br>R.WGLVWGAGVGAEEAR.Q<br>R.AAMAALWGLAAR.L<br>R.DVAEAEAPRR.R<br>R.FLTAIDJHPGAK.I<br>R.VGANAVTK.D<br>R.STLVDAEAYR.E<br>K.RHPTLADDVIVGSGAQLGPITVNAR.A<br>R.IAHLWLFEAR.L<br>R.DVAEAEAPRR.K<br>R.DGTGHSDAALAVVEEIR.A<br>R.LIMTASSTGLYGFQANVGAAL.L<br>K.AKEEWGGVHILINAGILR.D<br>R.AYALELAR.R<br>R.VAIVTGAGGGLGR.A<br>K.VVVDLGGAR.D<br>R.TREGVAAAWDK.I<br>R.TREGVAAAWDKIIDR.T<br>K.VHLLGSAYVTK.A<br>R.MTEDIFPAELFEK.F<br>R.CNTIAPVAGTR.M<br>K.EEWGGVHILINAGILR.D<br>R.LDAATGQPAPAAQPK.S<br>R.QQAALISLVWAFVDYR.I<br>R.VATATGDRDYADTDFGLR.T<br>R.YHLDLNDGGIVGGR.Q<br>R.AAFAQAFGER.R<br>R.LVDTGLDVASER.G<br>R.RGDLQLAGVFGDNAGDLLDSSNNAVSLDGR.V<br>K.SPSVAKASEIGWK.G<br>K.AQVATLESR.L<br>R.MQVDLAAVDPVATDAR.G<br>R.TADGWVDFKR.G<br>R.TGADPTFFGGYAEVGMVLTGDR.R<br>R.MIDVLEDSLVELTAAGIK.K<br>R.LITATTSFPMHILALR.T<br>R.AIVGAGQTEIGGNDR.Y<br>K.STTLQADFNYR.E<br>R.TDFAANLFGSAALLGLADALVELK.A<br>R.YGTGQVTSR.I<br>R.DAENRPVALLAAGTLK.V<br>K.LVAFGQAAQSEIILPLEAGLVDIPALDLSPEAAGAIR.Q<br>K.VNGGTLDPLASGVLPALGEATK.L<br>R.INTLTFHK.T<br>R.DKGDTSPEVQVAILTDR.I<br>R.RSLLDYLR.K |
| YP_615579 | Sala_0525 | Pyruvate dehydrogenase (lipoamide)      | 82.58%            | 32                      | K.LGTDVVLALDCAATEFFR.N<br>K.ALTDLGGTCTQLVGGDDLVFNPAR.L<br>R.EGRDPVVPYDTPQLEK.F<br>R.GAAEAALWEVR.A<br>R.ASAEDQLYR.R<br>K.KVAATPAPASNR.E<br>R.SREEVQAVR.D<br>K.LPIFVNIENQYAMGTSVNR.A<br>R.LIPGMQVDSMDLAVR.G<br>R.DHGHMLAYGIDPK.V<br>K.LMEGAGIGEDR.I<br>K.VIMAELTR.A<br>R.AIVAESADFAESAPEPDLSELYTDVLEQY.<br>R.GPVLMEK.T<br>K.FYGGHGLVGAQVSLGTGLAFAHK.Y<br>R.DKSDAIEHLK.K<br>K.GGSMHMFVSEHK.F<br>K.YRGGGVAMAYFGDGAANQGQVYESFNMAELWK.L<br>R.YRGHMSDPAK.Y<br>R.DPVYDTPQLEK.F<br>K.KLMEGAGIGEDR.I<br>R.GDGGVAMAYFGDGAANQGQVYESFNMAELWK.L<br>K.VAATPAPASNR.E<br>R.RGESFR.I<br>R.IKIDKIEIR.A<br>R.DKSDAIEHLK.L<br>K.VIMAELTR.A<br>K.LPIFVNIENQYAMGTSVNR.A<br>K.LMEGAGIGEDR.I<br>K.GGSMHMFVSEHK.F<br>R.GPVLMEK.T<br>R.GHMSDPAK.Y<br>K.LMEGAGIGEDRIK.D<br>K.DSVITYR.D<br>R.TEDPVFLENELLYGR.S<br>R.SFEVDPDVFVPIGK.A<br>R.TLRPLDTATVLSLKK.K<br>R.VGAQHSQNYGPWYASVPLVLIAPYDAADAK.G<br>K.VTQQLLEFGAR.R<br>R.ASDPAIPEGTAMVK.L<br>R.VFVMGEEVAEYQAYK.V<br>R.EALRDAMAEEMR.R<br>K.TNYMSGGQMR.C<br>K.AAIRTEDPVFLENELLYGR.S<br>R.VCNEDVPLPYANNLEK.A<br>R.TLRPLDTATVLSLKK.T<br>R.FGAHLFALSGETER.G<br>R.SEGLLLR.I<br>R.WGLVWGAGVGAEEAR.Q<br>R.AAMAALWGLAAR.L<br>R.DVAEAEAPRR.R<br>R.FLTAIDJHPGAK.I<br>R.VGANAVTK.D<br>R.STLVDAEAYR.E<br>K.RHPTLADDVIVGSGAQLGPITVNAR.A<br>R.IAHLWLFEAR.L<br>R.DVAEAEAPRR.K<br>R.DGTGHSDAALAVVEEIR.A<br>R.LIMTASSTGLYGFQANVGAAL.L<br>K.AKEEWGGVHILINAGILR.D<br>R.AYALELAR.R<br>R.VAIVTGAGGGLGR.A<br>K.VVVDLGGAR.D<br>R.TREGVAAAWDK.I<br>R.TREGVAAAWDKIIDR.T<br>K.VHLLGSAYVTK.A<br>R.MTEDIFPAELFEK.F<br>R.CNTIAPVAGTR.M<br>K.EEWGGVHILINAGILR.D<br>R.LDAATGQPAPAAQPK.S<br>R.QQAALISLVWAFVDYR.I<br>R.VATATGDRDYADTDFGLR.T<br>R.YHLDLNDGGIVGGR.Q<br>R.AAFAQAFGER.R<br>R.LVDTGLDVASER.G<br>R.RGDLQLAGVFGDNAGDLLDSSNNAVSLDGR.V<br>K.SPSVAKASEIGWK.G<br>K.AQVATLESR.L<br>R.MQVDLAAVDPVATDAR.G<br>R.TADGWVDFKR.G<br>R.TGADPTFFGGYAEVGMVLTGDR.R<br>R.MIDVLEDSLVELTAAGIK.K<br>R.LITATTSFPMHILALR.T<br>R.AIVGAGQTEIGGNDR.Y<br>K.STTLQADFNYR.E<br>R.TDFAANLFGSAALLGLADALVELK.A<br>R.YGTGQVTSR.I<br>R.DAENRPVALLAAGTLK.V<br>K.LVAFGQAAQSEIILPLEAGLVDIPALDLSPEAAGAIR.Q<br>K.VNGGTLDPLASGVLPALGEATK.L<br>R.INTLTFHK.T<br>R.DKGDTSPEVQVAILTDR.I<br>R.RSLLDYLR.K                                                                                                                                                                                                                                                                                                                                                                                                                                                                                                                                                                                                                                      |
| YP_615580 | Sala_0526 | Transketolase, central region           | 34.98%            | 12                      | R.TEDPVFLENELLYGR.S<br>R.SFEVDPDVFVPIGK.A<br>R.TLRPLDTATVLSLKK.K<br>R.VGAQHSQNYGPWYASVPLVLIAPYDAADAK.G<br>K.VTQQLLEFGAR.R<br>R.ASDPAIPEGTAMVK.L<br>R.VFVMGEEVAEYQAYK.V<br>R.EALRDAMAEEMR.R<br>K.TNYMSGGQMR.C<br>K.AAIRTEDPVFLENELLYGR.S<br>R.VCNEDVPLPYANNLEK.A<br>R.TLRPLDTATVLSLKK.T<br>R.FGAHLFALSGETER.G<br>R.SEGLLLR.I<br>R.WGLVWGAGVGAEEAR.Q<br>R.AAMAALWGLAAR.L<br>R.DVAEAEAPRR.R<br>R.FLTAIDJHPGAK.I<br>R.VGANAVTK.D<br>R.STLVDAEAYR.E<br>K.RHPTLADDVIVGSGAQLGPITVNAR.A<br>R.IAHLWLFEAR.L<br>R.DVAEAEAPRR.K<br>R.DGTGHSDAALAVVEEIR.A<br>R.LIMTASSTGLYGFQANVGAAL.L<br>K.AKEEWGGVHILINAGILR.D<br>R.AYALELAR.R<br>R.VAIVTGAGGGLGR.A<br>K.VVVDLGGAR.D<br>R.TREGVAAAWDK.I<br>R.TREGVAAAWDKIIDR.T<br>K.VHLLGSAYVTK.A<br>R.MTEDIFPAELFEK.F<br>R.CNTIAPVAGTR.M<br>K.EEWGGVHILINAGILR.D<br>R.LDAATGQPAPAAQPK.S<br>R.QQAALISLVWAFVDYR.I<br>R.VATATGDRDYADTDFGLR.T<br>R.YHLDLNDGGIVGGR.Q<br>R.AAFAQAFGER.R<br>R.LVDTGLDVASER.G<br>R.RGDLQLAGVFGDNAGDLLDSSNNAVSLDGR.V<br>K.SPSVAKASEIGWK.G<br>K.AQVATLESR.L<br>R.MQVDLAAVDPVATDAR.G<br>R.TADGWVDFKR.G<br>R.TGADPTFFGGYAEVGMVLTGDR.R<br>R.MIDVLEDSLVELTAAGIK.K<br>R.LITATTSFPMHILALR.T<br>R.AIVGAGQTEIGGNDR.Y<br>K.STTLQADFNYR.E<br>R.TDFAANLFGSAALLGLADALVELK.A<br>R.YGTGQVTSR.I<br>R.DAENRPVALLAAGTLK.V<br>K.LVAFGQAAQSEIILPLEAGLVDIPALDLSPEAAGAIR.Q<br>K.VNGGTLDPLASGVLPALGEATK.L<br>R.INTLTFHK.T<br>R.DKGDTSPEVQVAILTDR.I<br>R.RSLLDYLR.K                                                                                                                                                                                                                                                                                                                                                                                                                                                                                                                                                                                                                                                                                                                                                                                                                                                                                                                                                                                                                                                                                                                                                                                                                                                                                                                                                                                                    |
| YP_615581 | Sala_0527 | hypothetical protein                    | 22.97%            | 4                       | R.LDAATGQPAPAAQPK.S<br>R.QQAALISLVWAFVDYR.I<br>R.VATATGDRDYADTDFGLR.T<br>R.YHLDLNDGGIVGGR.Q<br>R.AAFAQAFGER.R<br>R.LVDTGLDVASER.G<br>R.RGDLQLAGVFGDNAGDLLDSSNNAVSLDGR.V<br>K.SPSVAKASEIGWK.G<br>K.AQVATLESR.L<br>R.MQVDLAAVDPVATDAR.G<br>R.TADGWVDFKR.G<br>R.TGADPTFFGGYAEVGMVLTGDR.R<br>R.MIDVLEDSLVELTAAGIK.K<br>R.LITATTSFPMHILALR.T<br>R.AIVGAGQTEIGGNDR.Y<br>K.STTLQADFNYR.E<br>R.TDFAANLFGSAALLGLADALVELK.A<br>R.YGTGQVTSR.I<br>R.DAENRPVALLAAGTLK.V<br>K.LVAFGQAAQSEIILPLEAGLVDIPALDLSPEAAGAIR.Q<br>K.VNGGTLDPLASGVLPALGEATK.L<br>R.INTLTFHK.T<br>R.DKGDTSPEVQVAILTDR.I<br>R.RSLLDYLR.K                                                                                                                                                                                                                                                                                                                                                                                                                                                                                                                                                                                                                                                                                                                                                                                                                                                                                                                                                                                                                                                                                                                                                                                                                                                                                                                                                                                                                                                                                                                                                                                                                                                                                                                                                                                                                                                                                                                                                                                                                                                                                                                                                                                              |
| YP_615582 | Sala_0528 | Serine O-acetyltransferase              | 33.19%            | 7                       | R.DVAEAEAPRR.R<br>R.FLTAIDJHPGAK.I<br>R.VGANAVTK.D<br>R.STLVDAEAYR.E<br>K.RHPTLADDVIVGSGAQLGPITVNAR.A<br>R.IAHLWLFEAR.L<br>R.DVAEAEAPRR.K<br>R.DGTGHSDAALAVVEEIR.A<br>R.LIMTASSTGLYGFQANVGAAL.L<br>K.AKEEWGGVHILINAGILR.D<br>R.AYALELAR.R<br>R.VAIVTGAGGGLGR.A<br>K.VVVDLGGAR.D<br>R.TREGVAAAWDK.I<br>R.TREGVAAAWDKIIDR.T<br>K.VHLLGSAYVTK.A<br>R.MTEDIFPAELFEK.F<br>R.CNTIAPVAGTR.M<br>K.EEWGGVHILINAGILR.D<br>R.LDAATGQPAPAAQPK.S<br>R.QQAALISLVWAFVDYR.I<br>R.VATATGDRDYADTDFGLR.T<br>R.YHLDLNDGGIVGGR.Q<br>R.AAFAQAFGER.R<br>R.LVDTGLDVASER.G<br>R.RGDLQLAGVFGDNAGDLLDSSNNAVSLDGR.V<br>K.SPSVAKASEIGWK.G<br>K.AQVATLESR.L<br>R.MQVDLAAVDPVATDAR.G<br>R.TADGWVDFKR.G<br>R.TGADPTFFGGYAEVGMVLTGDR.R<br>R.MIDVLEDSLVELTAAGIK.K<br>R.LITATTSFPMHILALR.T<br>R.AIVGAGQTEIGGNDR.Y<br>K.STTLQADFNYR.E<br>R.TDFAANLFGSAALLGLADALVELK.A<br>R.YGTGQVTSR.I<br>R.DAENRPVALLAAGTLK.V<br>K.LVAFGQAAQSEIILPLEAGLVDIPALDLSPEAAGAIR.Q<br>K.VNGGTLDPLASGVLPALGEATK.L<br>R.INTLTFHK.T<br>R.DKGDTSPEVQVAILTDR.I<br>R.RSLLDYLR.K                                                                                                                                                                                                                                                                                                                                                                                                                                                                                                                                                                                                                                                                                                                                                                                                                                                                                                                                                                                                                                                                                                                                                                                                                                                                                                                                                                                                                                                                                                                                                                                                                                                                                                                                                                              |
| YP_615585 | Sala_0531 | short-chain dehydrogenase/reductase SDR | 46.67%            | 12                      | R.DVAEAEAPRR.R<br>R.DGTGHSDAALAVVEEIR.A<br>R.LIMTASSTGLYGFQANVGAAL.L<br>K.AKEEWGGVHILINAGILR.D<br>R.AYALELAR.R<br>R.VAIVTGAGGGLGR.A<br>K.VVVDLGGAR.D<br>R.TREGVAAAWDK.I<br>R.TREGVAAAWDKIIDR.T<br>K.VHLLGSAYVTK.A<br>R.MTEDIFPAELFEK.F<br>R.CNTIAPVAGTR.M<br>K.EEWGGVHILINAGILR.D<br>R.LDAATGQPAPAAQPK.S<br>R.QQAALISLVWAFVDYR.I<br>R.VATATGDRDYADTDFGLR.T<br>R.YHLDLNDGGIVGGR.Q<br>R.AAFAQAFGER.R<br>R.LVDTGLDVASER.G<br>R.RGDLQLAGVFGDNAGDLLDSSNNAVSLDGR.V<br>K.SPSVAKASEIGWK.G<br>K.AQVATLESR.L<br>R.MQVDLAAVDPVATDAR.G<br>R.TADGWVDFKR.G<br>R.TGADPTFFGGYAEVGMVLTGDR.R<br>R.MIDVLEDSLVELTAAGIK.K<br>R.LITATTSFPMHILALR.T<br>R.AIVGAGQTEIGGNDR.Y<br>K.STTLQADFNYR.E<br>R.TDFAANLFGSAALLGLADALVELK.A<br>R.YGTGQVTSR.I<br>R.DAENRPVALLAAGTLK.V<br>K.LVAFGQAAQSEIILPLEAGLVDIPALDLSPEAAGAIR.Q<br>K.VNGGTLDPLASGVLPALGEATK.L<br>R.INTLTFHK.T<br>R.DKGDTSPEVQVAILTDR.I<br>R.RSLLDYLR.K                                                                                                                                                                                                                                                                                                                                                                                                                                                                                                                                                                                                                                                                                                                                                                                                                                                                                                                                                                                                                                                                                                                                                                                                                                                                                                                                                                                                                                                                                                                                                                                                                                                                                                                                                                                                                                                                                                         |
| YP_615586 | Sala_0532 | phosphate-selective porin O and P       | 43.56%            | 12                      | R.DVAEAEAPRR.R<br>R.DGTGHSDAALAVVEEIR.A<br>R.LIMTASSTGLYGFQANVGAAL.L<br>K.AKEEWGGVHILINAGILR.D<br>R.AYALELAR.R<br>R.VAIVTGAGGGLGR.A<br>K.VVVDLGGAR.D<br>R.TREGVAAAWDK.I<br>R.TREGVAAAWDKIIDR.T<br>K.VHLLGSAYVTK.A<br>R.MTEDIFPAELFEK.F<br>R.CNTIAPVAGTR.M<br>K.EEWGGVHILINAGILR.D<br>R.LDAATGQPAPAAQPK.S<br>R.QQAALISLVWAFVDYR.I<br>R.VATATGDRDYADTDFGLR.T<br>R.YHLDLNDGGIVGGR.Q<br>R.AAFAQAFGER.R<br>R.LVDTGLDVASER.G<br>R.RGDLQLAGVFGDNAGDLLDSSNNAVSLDGR.V<br>K.SPSVAKASEIGWK.G<br>K.AQVATLESR.L<br>R.MQVDLAAVDPVATDAR.G<br>R.TADGWVDFKR.G<br>R.TGADPTFFGGYAEVGMVLTGDR.R<br>R.MIDVLEDSLVELTAAGIK.K<br>R.LITATTSFPMHILALR.T<br>R.AIVGAGQTEIGGNDR.Y<br>K.STTLQADFNYR.E<br>R.TDFAANLFGSAALLGLADALVELK.A<br>R.YGTGQVTSR.I<br>R.DAENRPVALLAAGTLK.V<br>K.LVAFGQAAQSEIILPLEAGLVDIPALDLSPEAAGAIR.Q<br>K.VNGGTLDPLASGVLPALGEATK.L<br>R.INTLTFHK.T<br>R.DKGDTSPEVQVAILTDR.I<br>R.RSLLDYLR.K                                                                                                                                                                                                                                                                                                                                                                                                                                                                                                                                                                                                                                                                                                                                                                                                                                                                                                                                                                                                                                                                                                                                                                                                                                                                                                                                                                                                                                                                                                                                                                                                                                                                                                                                                                                                                                                                                                         |
| YP_615587 | Sala_0533 | protein of unknown function UPF0089     | 7.61%             | 2                       | R.MIDVLEDSLVELTAAGIK.K<br>R.LITATTSFPMHILALR.T<br>R.AIVGAGQTEIGGNDR.Y<br>K.STTLQADFNYR.E<br>R.TDFAANLFGSAALLGLADALVELK.A<br>R.YGTGQVTSR.I<br>R.DAENRPVALLAAGTLK.V<br>K.LVAFGQAAQSEIILPLEAGLVDIPALDLSPEAAGAIR.Q<br>K.VNGGTLDPLASGVLPALGEATK.L<br>R.INTLTFHK.T<br>R.DKGDTSPEVQVAILTDR.I<br>R.RSLLDYLR.K                                                                                                                                                                                                                                                                                                                                                                                                                                                                                                                                                                                                                                                                                                                                                                                                                                                                                                                                                                                                                                                                                                                                                                                                                                                                                                                                                                                                                                                                                                                                                                                                                                                                                                                                                                                                                                                                                                                                                                                                                                                                                                                                                                                                                                                                                                                                                                                                                                                                                       |
| YP_615592 | Sala_0538 | Thymidine kinase                        | 30.96%            | 4                       | R.MIDVLEDSLVELTAAGIK.K<br>R.LITATTSFPMHILALR.T<br>R.AIVGAGQTEIGGNDR.Y<br>K.STTLQADFNYR.E<br>R.TDFAANLFGSAALLGLADALVELK.A<br>R.YGTGQVTSR.I<br>R.DAENRPVALLAAGTLK.V<br>K.LVAFGQAAQSEIILPLEAGLVDIPALDLSPEAAGAIR.Q<br>K.VNGGTLDPLASGVLPALGEATK.L<br>R.INTLTFHK.T<br>R.DKGDTSPEVQVAILTDR.I<br>R.RSLLDYLR.K                                                                                                                                                                                                                                                                                                                                                                                                                                                                                                                                                                                                                                                                                                                                                                                                                                                                                                                                                                                                                                                                                                                                                                                                                                                                                                                                                                                                                                                                                                                                                                                                                                                                                                                                                                                                                                                                                                                                                                                                                                                                                                                                                                                                                                                                                                                                                                                                                                                                                       |
| YP_615595 | Sala_0541 | tRNA pseudouridine synthase B           | 25.16%            | 3                       | R.DAENRPVALLAAGTLK.V<br>K.LVAFGQAAQSEIILPLEAGLVDIPALDLSPEAAGAIR.Q<br>K.VNGGTLDPLASGVLPALGEATK.L<br>R.INTLTFHK.T<br>R.DKGDTSPEVQVAILTDR.I<br>R.RSLLDYLR.K                                                                                                                                                                                                                                                                                                                                                                                                                                                                                                                                                                                                                                                                                                                                                                                                                                                                                                                                                                                                                                                                                                                                                                                                                                                                                                                                                                                                                                                                                                                                                                                                                                                                                                                                                                                                                                                                                                                                                                                                                                                                                                                                                                                                                                                                                                                                                                                                                                                                                                                                                                                                                                    |
| YP_615596 | Sala_0542 | ribosomal protein S15                   | 51.69%            | 4                       | R.INTLTFHK.T<br>R.DKGDTSPEVQVAILTDR.I<br>R.RSLLDYLR.K                                                                                                                                                                                                                                                                                                                                                                                                                                                                                                                                                                                                                                                                                                                                                                                                                                                                                                                                                                                                                                                                                                                                                                                                                                                                                                                                                                                                                                                                                                                                                                                                                                                                                                                                                                                                                                                                                                                                                                                                                                                                                                                                                                                                                                                                                                                                                                                                                                                                                                                                                                                                                                                                                                                                       |



| Accession | Locus tag | Description                                           | Sequence coverage | No. peptides identified | List of peptides identified                                                                                                                                                                                                                                                                                                                                                                                                                                                                                                                                                                                                                                                                                                                                                                                                                                                                                                                                                                                                                                                                                                                                                                                                                                                                                                                                                                                                                                                                                                                                                                                                                                                                                                                                                                                                                                                                                                                                                                                                                                                                                                                                                                                                                                                                                                                                                                                                                                                                                                                                                                                                                                                                                                                                                                                                                                                                                                                                                                                                                                                                                                                                                                                                                                                                           |
|-----------|-----------|-------------------------------------------------------|-------------------|-------------------------|-------------------------------------------------------------------------------------------------------------------------------------------------------------------------------------------------------------------------------------------------------------------------------------------------------------------------------------------------------------------------------------------------------------------------------------------------------------------------------------------------------------------------------------------------------------------------------------------------------------------------------------------------------------------------------------------------------------------------------------------------------------------------------------------------------------------------------------------------------------------------------------------------------------------------------------------------------------------------------------------------------------------------------------------------------------------------------------------------------------------------------------------------------------------------------------------------------------------------------------------------------------------------------------------------------------------------------------------------------------------------------------------------------------------------------------------------------------------------------------------------------------------------------------------------------------------------------------------------------------------------------------------------------------------------------------------------------------------------------------------------------------------------------------------------------------------------------------------------------------------------------------------------------------------------------------------------------------------------------------------------------------------------------------------------------------------------------------------------------------------------------------------------------------------------------------------------------------------------------------------------------------------------------------------------------------------------------------------------------------------------------------------------------------------------------------------------------------------------------------------------------------------------------------------------------------------------------------------------------------------------------------------------------------------------------------------------------------------------------------------------------------------------------------------------------------------------------------------------------------------------------------------------------------------------------------------------------------------------------------------------------------------------------------------------------------------------------------------------------------------------------------------------------------------------------------------------------------------------------------------------------------------------------------------------------|
| YP_615597 | Sala_0543 | 3' exoribonuclease                                    | 67.19%            | 54                      | K.DEGRYQALIAK.L<br>R.EIFEALAAQAK.E<br>R.TTTQRPVIAETHFLPR.A<br>K.ISSSDLQJEAAK.K<br>R.GATEKETLVSR.L<br>K.VVNLDFGAFVFMFGK.D<br>K.VADVLSEGDVK.V<br>K.IRDVIGTGGK.V<br>K.SVKDQGFPLTVHYQEK.Y<br>K.ISSSDLQJEAAK.W<br>K.DGLVHVSER.N<br>R.VVDQETGALEDTRPAR.E<br>K.VAGTSEGITTMQMDIK.I<br>K.RPVSGIAMGLILEGK.D<br>K.ESFIADGLDPQAVMAGIK.I<br>K.VIIDDEGLIK.I<br>R.SEDGPEQGHVPDFLKD.<br>K.WIAGIVEEAEVKG.I<br>K.EPWEIASSDDAALKDK.L<br>K.DGQDFPLTVHYQEK.Y<br>R.ALHPVLPKDEFPYTR.L<br>K.DYALSDILGDHLDGMDMDFK.V<br>K.DIAAAK.L<br>R.TELSAHAPR.I<br>K.VSIEWGGTTLLETGK.V<br>K.KVSIWGGTTLLETGK.V<br>R.IETMQIDK.A<br>R.AHGSALFTR.G<br>K.LAEQAAKEPWEIASSDDAALK.D<br>K.KLEAIVR.T<br>R.AHLGEMNK.A<br>K.DGLVHVSER.N<br>R.SNALNEAR.A<br>R.KWJAGIVEEAEVKG.I<br>R.EIVATTGAK.V<br>K.AKESFIADGLDPQAVMAGIK.I<br>R.PVSGIAMGLILEGK.D<br>K.VLEIDPR.G<br>K.DAEQIMIDGLNLSYQHFMLHYNFPYSGEVGR.F<br>R.VVDQETGALEDTR.P<br>R.QAQGAVIATLGETVLCVATAK.S<br>R.GETQTIATCTLTK.D<br>R.ERSEDPEDQGHVPDFLKD.<br>K.VVNLDFGAFVFMFGK.D<br>K.VADVLSEGDVKV.V<br>K.RPVSGIAMGLILEGK.D<br>K.LAEQAAKEPWEIASSDDAALKDK.L<br>K.ESFIADGLDPQAVMAGIK.I<br>K.EPWEIASSDDAALK.D<br>R.LTSDITESNGSSMASVCGGSLAMMDAGVPIK.R<br>R.ERGATEKETLVSR.L<br>K.WIAGIVEEAEVKGIVDGK.V<br>K.VAGTSEGITTMQMDIK.I<br>K.LTDSKAR.S<br>K.AKESFIADGLDPQAVMAGIK.I<br>R.LSPGDATTFLLSDIK.G<br>R.SWGPANLIQAGNR.G<br>R.APYTAANFLR.Y<br>K.RAPYTAANFLR.Y<br>R.ITQQAALGETIVR.R<br>K.SAAVLGANYPGNEWYER.A<br>R.LTESYLALGIPPEAKK.S<br>R.SSNWLAASIR.F<br>R.GQYGAALFDEVER.Q<br>R.LKLDLVQHLGAK.E<br>R.LTESYLALGIPPEAKK.K<br>R.EYTPAIEAQR.F<br>R.EVVDKYQTTSHAPEALYR.L<br>K.DAPYAYLIALSYEQISDVTR.D<br>R.LDRGQYGAALFDEVER.Q<br>R.FLAHPGK.D<br>R.FREVDKYQTTSHAPEALYR.L<br>R.AQLMSSFSYMDREYTPAIEAQR.F<br>R.AQLMSSFSYMDR.E<br>K.YQTTSHAPEALYR.L<br>R.RYPDSR.Y<br>R.GQYGAALFDEVERQHPYSPWAR.R<br>R.FREVDKY<br>R.LDAIEGGSAGLAR.L<br>R.LAGDLGAILVFDGSDGGPALLR.G<br>R.AQVTASFAPPAAGSPLATLLANDITQGVGPLEIIR.R<br>K.SILLDALGLALGAR.A<br>R.LDLDFEAGLVLGTGETGAGK.S<br>R.LAGDHALLAEALALDR.A<br>K.VALAEEGGADTIIFDEIDR.G<br>R.LLAEADDPDKAR.Q<br>R.LVGAAVEASPLAK.V<br>R.AQTLEAIDIQVGRGTGK.L<br>R.VLWDDLSEVSPPPYVETR.D<br>R.AQITLEAIDIQVGR.T<br>K.SIAFLELWLEK.G<br>K.DVGSLEAEANMLMLAK.Q<br>K.AIESVGVVSPLLK.R<br>R.FSAGPGLTALFGPSGVGK.T<br>R.WMTEEAAGFLGIGHLFR.W<br>R.ANLLYGHALAPQANR.W<br>R.VIASDIDPASIFTR.D<br>R.AEAELSSEIPALDALDAPPVVTR.E<br>R.EIDEDTLGLQDLDKDPDAALLDLR.S<br>R.GIGAAIEALTSTATK.I<br>R.IDILVNNAGVFANPLDATDAEWLANWNR.T<br>K.IVALSSADGDLGDPATPDRLWHTSLDQLDGR.I<br>R.LWHTSLDQLDGR.I<br>K.IVALSSADGDLGDPATPDR.L<br>K.LLADIPLR.V<br>R.SEVEASAVTR.A<br>R.LQLEQAASEFSSR.V<br>R.LALLEFDMQR.Y<br>R.LAANAIEHAIAGR.E<br>R.NDSGMVATEISVLSQEFK.M<br>R.GSVSANQSIQITVDVQR.S<br>R.EAATAAGLIR.A<br>K.IAAIQQATR.G<br>R.ASEQAGEAVAMSEALSHHAESIESILGIR.E<br>R.VEGELVDSYVR.G<br>R.SIASLVQDTEGVR.E<br>R.RVEGELVDSYVR.G<br>R.LAANAIEHAIAGREEAVAR.A<br>R.GFAVVAQEVK.S<br>R.EIAGQTNLLANATIEAAR.A<br>R.AYWDAFNALPNMDR.R<br>K.IREAMDAAQIVTISITAAVDETLAADSMSSTIASIR.N<br>K.TSEVAASEQSAMAMR.E<br>R.TSTYALNVTLPALR.I<br>R.VLVTGAGEGIGAHDR.Y<br>R.GVLLGGVPGVAPGK.V<br>R.EGQILYTLHLAPDPDQTR.D<br>K.VTFAEVAEIGTDYVYVEQALD.<br>R.MSIQAGATALEK.A<br>R.DPHLLQGLNVWNGK.V<br>R.RDPHLLQGLNVWNGK.V<br>R.EGQILYTLHLAPDPDQTRDLMK.S<br>R.YYVEAGAEIVQSADDIFAGADMVVK.V<br>R.VGLTPESAR.E<br>R.ELVHGRH.V<br>K.EIKNHEVR.V<br>R.VLVTGAGEGIGAHDRYYVEAGAEIVQSADDIFAGADMVVK.V |
| YP_615598 | Sala_0544 | peptidyl-prolyl cis-trans isomerase, cyclophilin type | 18.38%            | 4                       | R.LSPGDATTFLLSDIK.G<br>R.SWGPANLIQAGNR.G<br>R.APYTAANFLR.Y<br>K.RAPYTAANFLR.Y<br>R.ITQQAALGETIVR.R<br>K.SAAVLGANYPGNEWYER.A<br>R.LTESYLALGIPPEAKK.S<br>R.SSNWLAASIR.F<br>R.GQYGAALFDEVER.Q<br>R.LKLDLVQHLGAK.E<br>R.LTESYLALGIPPEAKK.K<br>R.EYTPAIEAQR.F<br>R.EVVDKYQTTSHAPEALYR.L<br>K.DAPYAYLIALSYEQISDVTR.D<br>R.LDRGQYGAALFDEVER.Q<br>R.FLAHPGK.D<br>R.FREVDKYQTTSHAPEALYR.L<br>R.AQLMSSFSYMDREYTPAIEAQR.F<br>R.AQLMSSFSYMDR.E<br>K.YQTTSHAPEALYR.L<br>R.RYPDSR.Y<br>R.GQYGAALFDEVERQHPYSPWAR.R<br>R.FREVDKY                                                                                                                                                                                                                                                                                                                                                                                                                                                                                                                                                                                                                                                                                                                                                                                                                                                                                                                                                                                                                                                                                                                                                                                                                                                                                                                                                                                                                                                                                                                                                                                                                                                                                                                                                                                                                                                                                                                                                                                                                                                                                                                                                                                                                                                                                                                                                                                                                                                                                                                                                                                                                                                                                                                                                                                      |
| YP_615599 | Sala_0545 | DNA uptake lipoprotein                                | 73.11%            | 19                      | R.LLAEADDPDKAR.Q<br>R.LVGAAVEASPLAK.V<br>R.AQTLEAIDIQVGRGTGK.L<br>R.VLWDDLSEVSPPPYVETR.D<br>R.AQITLEAIDIQVGR.T<br>K.SIAFLELWLEK.G<br>K.DVGSLEAEANMLMLAK.Q<br>K.AIESVGVVSPLLK.R<br>R.FSAGPGLTALFGPSGVGK.T<br>R.WMTEEAAGFLGIGHLFR.W<br>R.ANLLYGHALAPQANR.W<br>R.VIASDIDPASIFTR.D<br>R.AEAELSSEIPALDALDAPPVVTR.E<br>R.EIDEDTLGLQDLDKDPDAALLDLR.S<br>R.GIGAAIEALTSTATK.I<br>R.IDILVNNAGVFANPLDATDAEWLANWNR.T<br>K.IVALSSADGDLGDPATPDRLWHTSLDQLDGR.I<br>R.LWHTSLDQLDGR.I<br>K.IVALSSADGDLGDPATPDR.L<br>K.LLADIPLR.V<br>R.SEVEASAVTR.A<br>R.LQLEQAASEFSSR.V<br>R.LALLEFDMQR.Y<br>R.LAANAIEHAIAGR.E<br>R.NDSGMVATEISVLSQEFK.M<br>R.GSVSANQSIQITVDVQR.S<br>R.EAATAAGLIR.A<br>K.IAAIQQATR.G<br>R.ASEQAGEAVAMSEALSHHAESIESILGIR.E<br>R.VEGELVDSYVR.G<br>R.SIASLVQDTEGVR.E<br>R.RVEGELVDSYVR.G<br>R.LAANAIEHAIAGREEAVAR.A<br>R.GFAVVAQEVK.S<br>R.EIAGQTNLLANATIEAAR.A<br>R.AYWDAFNALPNMDR.R<br>K.IREAMDAAQIVTISITAAVDETLAADSMSSTIASIR.N<br>K.TSEVAASEQSAMAMR.E<br>R.TSTYALNVTLPALR.I<br>R.VLVTGAGEGIGAHDR.Y<br>R.GVLLGGVPGVAPGK.V<br>R.EGQILYTLHLAPDPDQTR.D<br>K.VTFAEVAEIGTDYVYVEQALD.<br>R.MSIQAGATALEK.A<br>R.DPHLLQGLNVWNGK.V<br>R.RDPHLLQGLNVWNGK.V<br>R.EGQILYTLHLAPDPDQTRDLMK.S<br>R.YYVEAGAEIVQSADDIFAGADMVVK.V<br>R.VGLTPESAR.E<br>R.ELVHGRH.V<br>K.EIKNHEVR.V<br>R.VLVTGAGEGIGAHDRYYVEAGAEIVQSADDIFAGADMVVK.V                                                                                                                                                                                                                                                                                                                                                                                                                                                                                                                                                                                                                                                                                                                                                                                                                                                                                                                                                                                                                                                                                                                                                                                                                                                                                                                                                                                                                                                                                                                                                                                                                                                                                                                                                                                                                                                                                                                                                                                          |
| YP_615600 | Sala_0546 | DNA repair protein RecN                               | 25.54%            | 7                       | R.LLAEADDPDKAR.Q<br>R.LVGAAVEASPLAK.V<br>R.AQTLEAIDIQVGRGTGK.L<br>R.VLWDDLSEVSPPPYVETR.D<br>R.AQITLEAIDIQVGR.T<br>K.SIAFLELWLEK.G<br>K.DVGSLEAEANMLMLAK.Q<br>K.AIESVGVVSPLLK.R<br>R.FSAGPGLTALFGPSGVGK.T<br>R.WMTEEAAGFLGIGHLFR.W<br>R.ANLLYGHALAPQANR.W<br>R.VIASDIDPASIFTR.D<br>R.AEAELSSEIPALDALDAPPVVTR.E<br>R.EIDEDTLGLQDLDKDPDAALLDLR.S<br>R.GIGAAIEALTSTATK.I<br>R.IDILVNNAGVFANPLDATDAEWLANWNR.T<br>K.IVALSSADGDLGDPATPDRLWHTSLDQLDGR.I<br>R.LWHTSLDQLDGR.I<br>K.IVALSSADGDLGDPATPDR.L<br>K.LLADIPLR.V<br>R.SEVEASAVTR.A<br>R.LQLEQAASEFSSR.V<br>R.LALLEFDMQR.Y<br>R.LAANAIEHAIAGR.E<br>R.NDSGMVATEISVLSQEFK.M<br>R.GSVSANQSIQITVDVQR.S<br>R.EAATAAGLIR.A<br>K.IAAIQQATR.G<br>R.ASEQAGEAVAMSEALSHHAESIESILGIR.E<br>R.VEGELVDSYVR.G<br>R.SIASLVQDTEGVR.E<br>R.RVEGELVDSYVR.G<br>R.LAANAIEHAIAGREEAVAR.A<br>R.GFAVVAQEVK.S<br>R.EIAGQTNLLANATIEAAR.A<br>R.AYWDAFNALPNMDR.R<br>K.IREAMDAAQIVTISITAAVDETLAADSMSSTIASIR.N<br>K.TSEVAASEQSAMAMR.E<br>R.TSTYALNVTLPALR.I<br>R.VLVTGAGEGIGAHDR.Y<br>R.GVLLGGVPGVAPGK.V<br>R.EGQILYTLHLAPDPDQTR.D<br>K.VTFAEVAEIGTDYVYVEQALD.<br>R.MSIQAGATALEK.A<br>R.DPHLLQGLNVWNGK.V<br>R.RDPHLLQGLNVWNGK.V<br>R.EGQILYTLHLAPDPDQTRDLMK.S<br>R.YYVEAGAEIVQSADDIFAGADMVVK.V<br>R.VGLTPESAR.E<br>R.ELVHGRH.V<br>K.EIKNHEVR.V<br>R.VLVTGAGEGIGAHDRYYVEAGAEIVQSADDIFAGADMVVK.V                                                                                                                                                                                                                                                                                                                                                                                                                                                                                                                                                                                                                                                                                                                                                                                                                                                                                                                                                                                                                                                                                                                                                                                                                                                                                                                                                                                                                                                                                                                                                                                                                                                                                                                                                                                                                                                                                                                                                                                          |
| YP_615603 | Sala_0549 | DNA ligase, NAD-dependent                             | 15.13%            | 8                       | R.LLAEADDPDKAR.Q<br>R.LVGAAVEASPLAK.V<br>R.AQTLEAIDIQVGRGTGK.L<br>R.VLWDDLSEVSPPPYVETR.D<br>R.AQITLEAIDIQVGR.T<br>K.SIAFLELWLEK.G<br>K.DVGSLEAEANMLMLAK.Q<br>K.AIESVGVVSPLLK.R<br>R.FSAGPGLTALFGPSGVGK.T<br>R.WMTEEAAGFLGIGHLFR.W<br>R.ANLLYGHALAPQANR.W<br>R.VIASDIDPASIFTR.D<br>R.AEAELSSEIPALDALDAPPVVTR.E<br>R.EIDEDTLGLQDLDKDPDAALLDLR.S<br>R.GIGAAIEALTSTATK.I<br>R.IDILVNNAGVFANPLDATDAEWLANWNR.T<br>K.IVALSSADGDLGDPATPDRLWHTSLDQLDGR.I<br>R.LWHTSLDQLDGR.I<br>K.IVALSSADGDLGDPATPDR.L<br>K.LLADIPLR.V<br>R.SEVEASAVTR.A<br>R.LQLEQAASEFSSR.V<br>R.LALLEFDMQR.Y<br>R.LAANAIEHAIAGR.E<br>R.NDSGMVATEISVLSQEFK.M<br>R.GSVSANQSIQITVDVQR.S<br>R.EAATAAGLIR.A<br>K.IAAIQQATR.G<br>R.ASEQAGEAVAMSEALSHHAESIESILGIR.E<br>R.VEGELVDSYVR.G<br>R.SIASLVQDTEGVR.E<br>R.RVEGELVDSYVR.G<br>R.LAANAIEHAIAGREEAVAR.A<br>R.GFAVVAQEVK.S<br>R.EIAGQTNLLANATIEAAR.A<br>R.AYWDAFNALPNMDR.R<br>K.IREAMDAAQIVTISITAAVDETLAADSMSSTIASIR.N<br>K.TSEVAASEQSAMAMR.E<br>R.TSTYALNVTLPALR.I<br>R.VLVTGAGEGIGAHDR.Y<br>R.GVLLGGVPGVAPGK.V<br>R.EGQILYTLHLAPDPDQTR.D<br>K.VTFAEVAEIGTDYVYVEQALD.<br>R.MSIQAGATALEK.A<br>R.DPHLLQGLNVWNGK.V<br>R.RDPHLLQGLNVWNGK.V<br>R.EGQILYTLHLAPDPDQTRDLMK.S<br>R.YYVEAGAEIVQSADDIFAGADMVVK.V<br>R.VGLTPESAR.E<br>R.ELVHGRH.V<br>K.EIKNHEVR.V<br>R.VLVTGAGEGIGAHDRYYVEAGAEIVQSADDIFAGADMVVK.V                                                                                                                                                                                                                                                                                                                                                                                                                                                                                                                                                                                                                                                                                                                                                                                                                                                                                                                                                                                                                                                                                                                                                                                                                                                                                                                                                                                                                                                                                                                                                                                                                                                                                                                                                                                                                                                                                                                                                                                          |
| YP_615606 | Sala_0552 | ABC transporter related                               | 25.24%            | 3                       | R.LLAEADDPDKAR.Q<br>R.LVGAAVEASPLAK.V<br>R.AQTLEAIDIQVGRGTGK.L<br>R.VLWDDLSEVSPPPYVETR.D<br>R.AQITLEAIDIQVGR.T<br>K.SIAFLELWLEK.G<br>K.DVGSLEAEANMLMLAK.Q<br>K.AIESVGVVSPLLK.R<br>R.FSAGPGLTALFGPSGVGK.T<br>R.WMTEEAAGFLGIGHLFR.W<br>R.ANLLYGHALAPQANR.W<br>R.VIASDIDPASIFTR.D<br>R.AEAELSSEIPALDALDAPPVVTR.E<br>R.EIDEDTLGLQDLDKDPDAALLDLR.S<br>R.GIGAAIEALTSTATK.I<br>R.IDILVNNAGVFANPLDATDAEWLANWNR.T<br>K.IVALSSADGDLGDPATPDRLWHTSLDQLDGR.I<br>R.LWHTSLDQLDGR.I<br>K.IVALSSADGDLGDPATPDR.L<br>K.LLADIPLR.V<br>R.SEVEASAVTR.A<br>R.LQLEQAASEFSSR.V<br>R.LALLEFDMQR.Y<br>R.LAANAIEHAIAGR.E<br>R.NDSGMVATEISVLSQEFK.M<br>R.GSVSANQSIQITVDVQR.S<br>R.EAATAAGLIR.A<br>K.IAAIQQATR.G<br>R.ASEQAGEAVAMSEALSHHAESIESILGIR.E<br>R.VEGELVDSYVR.G<br>R.SIASLVQDTEGVR.E<br>R.RVEGELVDSYVR.G<br>R.LAANAIEHAIAGREEAVAR.A<br>R.GFAVVAQEVK.S<br>R.EIAGQTNLLANATIEAAR.A<br>R.AYWDAFNALPNMDR.R<br>K.IREAMDAAQIVTISITAAVDETLAADSMSSTIASIR.N<br>K.TSEVAASEQSAMAMR.E<br>R.TSTYALNVTLPALR.I<br>R.VLVTGAGEGIGAHDR.Y<br>R.GVLLGGVPGVAPGK.V<br>R.EGQILYTLHLAPDPDQTR.D<br>K.VTFAEVAEIGTDYVYVEQALD.<br>R.MSIQAGATALEK.A<br>R.DPHLLQGLNVWNGK.V<br>R.RDPHLLQGLNVWNGK.V<br>R.EGQILYTLHLAPDPDQTRDLMK.S<br>R.YYVEAGAEIVQSADDIFAGADMVVK.V<br>R.VGLTPESAR.E<br>R.ELVHGRH.V<br>K.EIKNHEVR.V<br>R.VLVTGAGEGIGAHDRYYVEAGAEIVQSADDIFAGADMVVK.V                                                                                                                                                                                                                                                                                                                                                                                                                                                                                                                                                                                                                                                                                                                                                                                                                                                                                                                                                                                                                                                                                                                                                                                                                                                                                                                                                                                                                                                                                                                                                                                                                                                                                                                                                                                                                                                                                                                                                                                          |
| YP_615608 | Sala_0554 | ribosomal L11 methyltransferase                       | 21.05%            | 3                       | R.LLAEADDPDKAR.Q<br>R.LVGAAVEASPLAK.V<br>R.AQTLEAIDIQVGRGTGK.L<br>R.VLWDDLSEVSPPPYVETR.D<br>R.AQITLEAIDIQVGR.T<br>K.SIAFLELWLEK.G<br>K.DVGSLEAEANMLMLAK.Q<br>K.AIESVGVVSPLLK.R<br>R.FSAGPGLTALFGPSGVGK.T<br>R.WMTEEAAGFLGIGHLFR.W<br>R.ANLLYGHALAPQANR.W<br>R.VIASDIDPASIFTR.D<br>R.AEAELSSEIPALDALDAPPVVTR.E<br>R.EIDEDTLGLQDLDKDPDAALLDLR.S<br>R.GIGAAIEALTSTATK.I<br>R.IDILVNNAGVFANPLDATDAEWLANWNR.T<br>K.IVALSSADGDLGDPATPDRLWHTSLDQLDGR.I<br>R.LWHTSLDQLDGR.I<br>K.IVALSSADGDLGDPATPDR.L<br>K.LLADIPLR.V<br>R.SEVEASAVTR.A<br>R.LQLEQAASEFSSR.V<br>R.LALLEFDMQR.Y<br>R.LAANAIEHAIAGR.E<br>R.NDSGMVATEISVLSQEFK.M<br>R.GSVSANQSIQITVDVQR.S<br>R.EAATAAGLIR.A<br>K.IAAIQQATR.G<br>R.ASEQAGEAVAMSEALSHHAESIESILGIR.E<br>R.VEGELVDSYVR.G<br>R.SIASLVQDTEGVR.E<br>R.RVEGELVDSYVR.G<br>R.LAANAIEHAIAGREEAVAR.A<br>R.GFAVVAQEVK.S<br>R.EIAGQTNLLANATIEAAR.A<br>R.AYWDAFNALPNMDR.R<br>K.IREAMDAAQIVTISITAAVDETLAADSMSSTIASIR.N<br>K.TSEVAASEQSAMAMR.E<br>R.TSTYALNVTLPALR.I<br>R.VLVTGAGEGIGAHDR.Y<br>R.GVLLGGVPGVAPGK.V<br>R.EGQILYTLHLAPDPDQTR.D<br>K.VTFAEVAEIGTDYVYVEQALD.<br>R.MSIQAGATALEK.A<br>R.DPHLLQGLNVWNGK.V<br>R.RDPHLLQGLNVWNGK.V<br>R.EGQILYTLHLAPDPDQTRDLMK.S<br>R.YYVEAGAEIVQSADDIFAGADMVVK.V<br>R.VGLTPESAR.E<br>R.ELVHGRH.V<br>K.EIKNHEVR.V<br>R.VLVTGAGEGIGAHDRYYVEAGAEIVQSADDIFAGADMVVK.V                                                                                                                                                                                                                                                                                                                                                                                                                                                                                                                                                                                                                                                                                                                                                                                                                                                                                                                                                                                                                                                                                                                                                                                                                                                                                                                                                                                                                                                                                                                                                                                                                                                                                                                                                                                                                                                                                                                                                                                          |
| YP_615609 | Sala_0555 | short-chain dehydrogenase/reductase SDR               | 36.96%            | 6                       | R.LLAEADDPDKAR.Q<br>R.LVGAAVEASPLAK.V<br>R.AQTLEAIDIQVGRGTGK.L<br>R.VLWDDLSEVSPPPYVETR.D<br>R.AQITLEAIDIQVGR.T<br>K.SIAFLELWLEK.G<br>K.DVGSLEAEANMLMLAK.Q<br>K.AIESVGVVSPLLK.R<br>R.FSAGPGLTALFGPSGVGK.T<br>R.WMTEEAAGFLGIGHLFR.W<br>R.ANLLYGHALAPQANR.W<br>R.VIASDIDPASIFTR.D<br>R.AEAELSSEIPALDALDAPPVVTR.E<br>R.EIDEDTLGLQDLDKDPDAALLDLR.S<br>R.GIGAAIEALTSTATK.I<br>R.IDILVNNAGVFANPLDATDAEWLANWNR.T<br>K.IVALSSADGDLGDPATPDRLWHTSLDQLDGR.I<br>R.LWHTSLDQLDGR.I<br>K.IVALSSADGDLGDPATPDR.L<br>K.LLADIPLR.V<br>R.SEVEASAVTR.A<br>R.LQLEQAASEFSSR.V<br>R.LALLEFDMQR.Y<br>R.LAANAIEHAIAGR.E<br>R.NDSGMVATEISVLSQEFK.M<br>R.GSVSANQSIQITVDVQR.S<br>R.EAATAAGLIR.A<br>K.IAAIQQATR.G<br>R.ASEQAGEAVAMSEALSHHAESIESILGIR.E<br>R.VEGELVDSYVR.G<br>R.SIASLVQDTEGVR.E<br>R.RVEGELVDSYVR.G<br>R.LAANAIEHAIAGREEAVAR.A<br>R.GFAVVAQEVK.S<br>R.EIAGQTNLLANATIEAAR.A<br>R.AYWDAFNALPNMDR.R<br>K.IREAMDAAQIVTISITAAVDETLAADSMSSTIASIR.N<br>K.TSEVAASEQSAMAMR.E<br>R.TSTYALNVTLPALR.I<br>R.VLVTGAGEGIGAHDR.Y<br>R.GVLLGGVPGVAPGK.V<br>R.EGQILYTLHLAPDPDQTR.D<br>K.VTFAEVAEIGTDYVYVEQALD.<br>R.MSIQAGATALEK.A<br>R.DPHLLQGLNVWNGK.V<br>R.RDPHLLQGLNVWNGK.V<br>R.EGQILYTLHLAPDPDQTRDLMK.S<br>R.YYVEAGAEIVQSADDIFAGADMVVK.V<br>R.VGLTPESAR.E<br>R.ELVHGRH.V<br>K.EIKNHEVR.V<br>R.VLVTGAGEGIGAHDRYYVEAGAEIVQSADDIFAGADMVVK.V                                                                                                                                                                                                                                                                                                                                                                                                                                                                                                                                                                                                                                                                                                                                                                                                                                                                                                                                                                                                                                                                                                                                                                                                                                                                                                                                                                                                                                                                                                                                                                                                                                                                                                                                                                                                                                                                                                                                                                                          |
| YP_615610 | Sala_0556 | methyl-accepting chemotaxis sensory transducer        | 59.11%            | 18                      | R.LLAEADDPDKAR.Q<br>R.LVGAAVEASPLAK.V<br>R.AQTLEAIDIQVGRGTGK.L<br>R.VLWDDLSEVSPPPYVETR.D<br>R.AQITLEAIDIQVGR.T<br>K.SIAFLELWLEK.G<br>K.DVGSLEAEANMLMLAK.Q<br>K.AIESVGVVSPLLK.R<br>R.FSAGPGLTALFGPSGVGK.T<br>R.WMTEEAAGFLGIGHLFR.W<br>R.ANLLYGHALAPQANR.W<br>R.VIASDIDPASIFTR.D<br>R.AEAELSSEIPALDALDAPPVVTR.E<br>R.EIDEDTLGLQDLDKDPDAALLDLR.S<br>R.GIGAAIEALTSTATK.I<br>R.IDILVNNAGVFANPLDATDAEWLANWNR.T<br>K.IVALSSADGDLGDPATPDRLWHTSLDQLDGR.I<br>R.LWHTSLDQLDGR.I<br>K.IVALSSADGDLGDPATPDR.L<br>K.LLADIPLR.V<br>R.SEVEASAVTR.A<br>R.LQLEQAASEFSSR.V<br>R.LALLEFDMQR.Y<br>R.LAANAIEHAIAGR.E<br>R.NDSGMVATEISVLSQEFK.M<br>R.GSVSANQSIQITVDVQR.S<br>R.EAATAAGLIR.A<br>K.IAAIQQATR.G<br>R.ASEQAGEAVAMSEALSHHAESIESILGIR.E<br>R.VEGELVDSYVR.G<br>R.SIASLVQDTEGVR.E<br>R.RVEGELVDSYVR.G<br>R.LAANAIEHAIAGREEAVAR.A<br>R.GFAVVAQEVK.S<br>R.EIAGQTNLLANATIEAAR.A<br>R.AYWDAFNALPNMDR.R<br>K.IREAMDAAQIVTISITAAVDETLAADSMSSTIASIR.N<br>K.TSEVAASEQSAMAMR.E<br>R.TSTYALNVTLPALR.I<br>R.VLVTGAGEGIGAHDR.Y<br>R.GVLLGGVPGVAPGK.V<br>R.EGQILYTLHLAPDPDQTR.D<br>K.VTFAEVAEIGTDYVYVEQALD.<br>R.MSIQAGATALEK.A<br>R.DPHLLQGLNVWNGK.V<br>R.RDPHLLQGLNVWNGK.V<br>R.EGQILYTLHLAPDPDQTRDLMK.S<br>R.YYVEAGAEIVQSADDIFAGADMVVK.V<br>R.VGLTPESAR.E<br>R.ELVHGRH.V<br>K.EIKNHEVR.V<br>R.VLVTGAGEGIGAHDRYYVEAGAEIVQSADDIFAGADMVVK.V                                                                                                                                                                                                                                                                                                                                                                                                                                                                                                                                                                                                                                                                                                                                                                                                                                                                                                                                                                                                                                                                                                                                                                                                                                                                                                                                                                                                                                                                                                                                                                                                                                                                                                                                                                                                                                                                                                                                                                                          |
| YP_615612 | Sala_0558 | alanine dehydrogenase                                 | 56.87%            | 18                      | R.LLAEADDPDKAR.Q<br>R.LVGAAVEASPLAK.V<br>R.AQTLEAIDIQVGRGTGK.L<br>R.VLWDDLSEVSPPPYVETR.D<br>R.AQITLEAIDIQVGR.T<br>K.SIAFLELWLEK.G<br>K.DVGSLEAEANMLMLAK.Q<br>K.AIESVGVVSPLLK.R<br>R.FSAGPGLTALFGPSGVGK.T<br>R.WMTEEAAGFLGIGHLFR.W<br>R.ANLLYGHALAPQANR.W<br>R.VIASDIDPASIFTR.D<br>R.AEAELSSEIPALDALDAPPVVTR.E<br>R.EIDEDTLGLQDLDKDPDAALLDLR.S<br>R.GIGAAIEALTSTATK.I<br>R.IDILVNNAGVFANPLDATDAEWLANWNR.T<br>K.IVALSSADGDLGDPATPDRLWHTSLDQLDGR.I<br>R.LWHTSLDQLDGR.I<br>K.IVALSSADGDLGDPATPDR.L<br>K.LLADIPLR.V<br>R.SEVEASAVTR.A<br>R.LQLEQAASEFSSR.V<br>R.LALLEFDMQR.Y<br>R.LAANAIEHAIAGR.E<br>R.NDSGMVATEISVLSQEFK.M<br>R.GSVSANQSIQITVDVQR.S<br>R.EAATAAGLIR.A<br>K.IAAIQQATR.G<br>R.ASEQAGEAVAMSEALSHHAESIESILGIR.E<br>R.VEGELVDSYVR.G<br>R.SIASLVQDTEGVR.E<br>R.RVEGELVDSYVR.G<br>R.LAANAIEHAIAGREEAVAR.A<br>R.GFAVVAQEVK.S<br>R.EIAGQTNLLANATIEAAR.A<br>R.AYWDAFNALPNMDR.R<br>K.IREAMDAAQIVTISITAAVDETLAADSMSSTIASIR.N<br>K.TSEVAASEQSAMAMR.E<br>R.TSTYALNVTLPALR.I<br>R.VLVTGAGEGIGAHDR.Y<br>R.GVLLGGVPGVAPGK.V<br>R.EGQILYTLHLAPDPDQTR.D<br>K.VTFAEVAEIGTDYVYVEQALD.<br>R.MSIQAGATALEK.A<br>R.DPHLLQGLNVWNGK.V<br>R.RDPHLLQGLNVWNGK.V<br>R.EGQILYTLHLAPDPDQTRDLMK.S<br>R.YYVEAGAEIVQSADDIFAGADMVVK.V<br>R.VGLTPESAR.E<br>R.ELVHGRH.V<br>K.EIKNHEVR.V<br>R.VLVTGAGEGIGAHDRYYVEAGAEIVQSADDIFAGADMVVK.V                                                                                                                                                                                                                                                                                                                                                                                                                                                                                                                                                                                                                                                                                                                                                                                                                                                                                                                                                                                                                                                                                                                                                                                                                                                                                                                                                                                                                                                                                                                                                                                                                                                                                                                                                                                                                                                                                                                                                                                          |

| Accession | Locus tag | Description                                                  | Sequence coverage | No. peptides identified | List of peptides identified                                                                                                                                                                                                                                                                                                                                                                                                                                                                                                                                                                                                                                                                                                                                                                                                                                                                                                                                                                                                                                                                                                                                                                                                                                                                                                                                                                                                                                                                                                                                                                                                                                                                                                                                                                                                                                                                                                                                                                                                                                                                                                                                                                                                                                                                                                                                                                                                                                                                                                                                                                                                                                                                                                                                                                                                                                                                                                                                                                                                                                                                                                                                                                                                                                                                      |
|-----------|-----------|--------------------------------------------------------------|-------------------|-------------------------|--------------------------------------------------------------------------------------------------------------------------------------------------------------------------------------------------------------------------------------------------------------------------------------------------------------------------------------------------------------------------------------------------------------------------------------------------------------------------------------------------------------------------------------------------------------------------------------------------------------------------------------------------------------------------------------------------------------------------------------------------------------------------------------------------------------------------------------------------------------------------------------------------------------------------------------------------------------------------------------------------------------------------------------------------------------------------------------------------------------------------------------------------------------------------------------------------------------------------------------------------------------------------------------------------------------------------------------------------------------------------------------------------------------------------------------------------------------------------------------------------------------------------------------------------------------------------------------------------------------------------------------------------------------------------------------------------------------------------------------------------------------------------------------------------------------------------------------------------------------------------------------------------------------------------------------------------------------------------------------------------------------------------------------------------------------------------------------------------------------------------------------------------------------------------------------------------------------------------------------------------------------------------------------------------------------------------------------------------------------------------------------------------------------------------------------------------------------------------------------------------------------------------------------------------------------------------------------------------------------------------------------------------------------------------------------------------------------------------------------------------------------------------------------------------------------------------------------------------------------------------------------------------------------------------------------------------------------------------------------------------------------------------------------------------------------------------------------------------------------------------------------------------------------------------------------------------------------------------------------------------------------------------------------------------|
| YP_615613 | Sala_0559 | hypothetical protein                                         | 49.35%            | 3                       | R.ANLAECEVAEDLVIGAVLIPGAEAPK.L<br>K.VKEPQPER.A<br>R.VGTFPEAR.A<br>R.MSIQAGATALEK.A<br>R.EAAEAEEAADKEAGK.S<br>K.TAAAGLIGSAVAIAALLYANR.G<br>R.EAAEAEEAADK.E<br>R.LVEQGYGAAVTR.D<br>R.ATSAIEALQQA.<br>K.AAASSDELIAEAAADTIVIGVYVFAIPAALK.A<br>R.VLLIEDEPTAK.A<br>R.DIDDEGNEVR.R<br>K.LFDVLAAR.Y<br>R.ASDAAPAIIEFVDR.D<br>K.QQSDGPVTTDELEDA<br>R.NHSASLKHQITTTVAK.A<br>R.ASDAAPAIIEFVDRDMGAK.G<br>K.HEQITTTVAK.A<br>R.LMDEAQLAK.L<br>K.RGGANR.R<br>K.LVTLAK.R<br>R.VLLSSLQGAATSIK.I<br>R.IQQLDYDKLNLITVETDGTVPEDAVAYAAR.I<br>K.GYVATANRPAAPIGLIPVDSLYSPVR.Q<br>R.FGGLTGNALR.R<br>K.SLNEIKEVLSMGLR.L<br>K.IENVLHEFSSLAGVREDVTDIVLNVK.Q<br>R.LQLSATGPATVK.A<br>R.EDVTDIVLNVK.Q<br>K.IENVLHEFSSLAGVR.E<br>K.NDNIIYGDVQK.T<br>K.KVDELELSVR.S<br>K.ATFVAEPLER.G<br>K.RLQLSATGPATVK.A<br>K.AGDIIVSGDIK.V<br>R.LGMDIPGWPPENIEEMAK.K<br>R.VLLSSLQGAATSIKIENVLHEFSSLAGVR.E<br>R.KATFVAEPLER.G<br>R.PADAPIGLIPVDSLYSPVR.Q<br>K.NDNIIYGDVQKTEAEMLR.T<br>R.VLLSSLQGAATSIK.I<br>K.VDELELSVR.S<br>K.KPSNLEIK.T<br>R.IIQDQLQVVFHEEAMSDSGLIGMAAPSAASDESVDVNLNR.F<br>R.SANCLKNDNIIYGDVQK.T<br>R.NWQELKPSNLEIK.T<br>R.LGMDIPGWPPENIEEMAK.K<br>R.KSLNEIKEVLSMGLR.L<br>K.VMNPNHVICHDEGATLNMLVADTGK.G<br>K.LNLTVETDGTVPEDAVAYAAR.I<br>K.AGDIIVSGDIK.V<br>R.QVAYKVDNAR.I<br>K.VMNPNHVICHDEGATLNMLVADTGK.G<br>K.VMNPNHVICHDEGATLNMLVADTGK.G<br>K.SLNEIKEVLSMGLR.L<br>K.KLEQELLG.<br>R.ALQAVGFHITSIR.D<br>R.TLEVEVKGGAGR.E<br>R.DVTFPHHNGVR.P<br>R.TLEVEVK.G<br>R.VQDLSDAEVLQIR.E<br>R.RVQDLSDAEVLQIR.E<br>R.IAGVNLPTNKR.V<br>K.TAVDIADKLGIDHGR.R<br>R.VIIALTYHIGR.K<br>R.IAGVNLPTNKR.R<br>R.VQDLSDAEVLQIRETIDADHTVEGDLR.R<br>R.VIIALTYHIGR.K.T<br>R.KTAVDIADK.L<br>R.NTAMNIKR.L<br>K.TAVDIADK.L<br>K.VIIALTYHIGR.K<br>R.EAPEPYAGLAPADLLFR.G<br>R.GAVPDLDDGSEADPAALR.E<br>R.AVAGVTNSEGGSASHSR.T<br>R.EAALAVEDAAR.A<br>R.SRPFDEGLPTAAR.D<br>R.LGALEDEVERSEGQDISLR.V<br>R.LGALEDEVER.S<br>R.ITGWLLDSASAR.Q<br>R.DYAWHSAHLLDLESAADIGAR.A<br>R.VSGGIVGHLLAIAIGPAIAR.G<br>R.SEGQDISLR.V<br>R.SASVSTADMDAGELAR.L<br>R.QLGLTPTGHASR.G<br>R.LAGIDAAAEEVAEAVAEER.A<br>R.RLAGIDAAAEEVAEAVAEER.A<br>R.AADKTWQAMIAER.A<br>R.NEAWANK.V<br>R.NEAWANKVVALER.V<br>R.FGTDSCSPTGLGGFTGCTQALVAGAR.A<br>R.YRVPILR.G<br>R.VDQAGEFGATR.I<br>R.APGYPLLSLAIR.A<br>R.QQDELGDSDPELSAAVADF.R.A<br>R.EIHHAEQER.H<br>R.QQDELGDSDPELSAAVADFRAELEHR.D<br>R.SNPGGLDEAVGISDFLER.G<br>R.YFAEPGLDAAGAPVIVLIDAGSASASEVAGALQDQHR.A<br>K.VIAPTADTPAAR.A<br>K.GIEDFQLHYALQTIGR.I<br>K.GSVQTVPLSDTIALR.L<br>R.FTATADELAKK.G<br>K.SNYVEVEDAK.L<br>R.AGSLVDAHGLR.K<br>R.ASDFLALTR.A<br>R.AGSLVDAHGLRK.W<br>R.LAADIADAEVAALPDPVGR.E<br>R.AQGLDIIIRR.G<br>R.GPVALEGLTTYK.W<br>R.HTDAIVTEDAATAER.F<br>R.GGSEAVHSNR.A<br>R.ALHAAFAAGLVEAGLPADAVQLVPTQDR.A<br>R.VPVLALDGINHLYIDGAANPAK.A<br>R.IFRPNGLSLR.V<br>R.VPLVIGIYIESRPNVTADAAALGLMAGNAVILR.G<br>R.TGICGATETLIDR.A<br>R.SAAILAANAEDMAAGQTNGLSGAMLDR.L<br>R.AVESAHGGAER.A<br>R.AAGPPVLDPRDQVATSADFISR.N<br>R.NILQSAATYLVGAR.A<br>R.MNGDIEGIGAAVYAGLAAR.A<br>R.SPDAEAGVSSFLEK.R<br>K.GLVQSIHAPGELVDAAIAR.A<br>R.ELTEHSAPVSVLTR.H<br>R.GRSPDAEAGVSSFLEK.R<br>K.RPANTASVANDYVFAEFEEAPPYS.<br>R.ISEHFTLLGNIGVYTHFR.R<br>R.DLGGVEAYQVAR.R<br>R.LGIEEGTQPR.T<br>K.ILYEGPEPTLIQYFK.D<br>R.QVEIPIEVIVR.N<br>R.INDFMSGHFAAVGIR.L<br>R.RLGLPEGGDNAVLDLESHR.K<br>K.RLGIIEGTQPR.T<br>R.LVDFKLEFGR.L<br>K.ILYEGPEPTLIQYFKDATAFNAQK.R |
| YP_615614 | Sala_0560 | (Acyl-carrier protein) phosphodiesterase                     | 30.15%            | 3                       |                                                                                                                                                                                                                                                                                                                                                                                                                                                                                                                                                                                                                                                                                                                                                                                                                                                                                                                                                                                                                                                                                                                                                                                                                                                                                                                                                                                                                                                                                                                                                                                                                                                                                                                                                                                                                                                                                                                                                                                                                                                                                                                                                                                                                                                                                                                                                                                                                                                                                                                                                                                                                                                                                                                                                                                                                                                                                                                                                                                                                                                                                                                                                                                                                                                                                                  |
| YP_615617 | Sala_0563 | two component transcriptional regulator, winged helix family | 9.36%             | 2                       |                                                                                                                                                                                                                                                                                                                                                                                                                                                                                                                                                                                                                                                                                                                                                                                                                                                                                                                                                                                                                                                                                                                                                                                                                                                                                                                                                                                                                                                                                                                                                                                                                                                                                                                                                                                                                                                                                                                                                                                                                                                                                                                                                                                                                                                                                                                                                                                                                                                                                                                                                                                                                                                                                                                                                                                                                                                                                                                                                                                                                                                                                                                                                                                                                                                                                                  |
| YP_615618 | Sala_0564 | ribosomal protein L17                                        | 60.43%            | 9                       |                                                                                                                                                                                                                                                                                                                                                                                                                                                                                                                                                                                                                                                                                                                                                                                                                                                                                                                                                                                                                                                                                                                                                                                                                                                                                                                                                                                                                                                                                                                                                                                                                                                                                                                                                                                                                                                                                                                                                                                                                                                                                                                                                                                                                                                                                                                                                                                                                                                                                                                                                                                                                                                                                                                                                                                                                                                                                                                                                                                                                                                                                                                                                                                                                                                                                                  |
| YP_615619 | Sala_0565 | DNA-directed RNA polymerase, alpha subunit                   | 100.00%           | 35                      |                                                                                                                                                                                                                                                                                                                                                                                                                                                                                                                                                                                                                                                                                                                                                                                                                                                                                                                                                                                                                                                                                                                                                                                                                                                                                                                                                                                                                                                                                                                                                                                                                                                                                                                                                                                                                                                                                                                                                                                                                                                                                                                                                                                                                                                                                                                                                                                                                                                                                                                                                                                                                                                                                                                                                                                                                                                                                                                                                                                                                                                                                                                                                                                                                                                                                                  |
| YP_615620 | Sala_0566 | ribosomal protein S11                                        | 28.68%            | 4                       |                                                                                                                                                                                                                                                                                                                                                                                                                                                                                                                                                                                                                                                                                                                                                                                                                                                                                                                                                                                                                                                                                                                                                                                                                                                                                                                                                                                                                                                                                                                                                                                                                                                                                                                                                                                                                                                                                                                                                                                                                                                                                                                                                                                                                                                                                                                                                                                                                                                                                                                                                                                                                                                                                                                                                                                                                                                                                                                                                                                                                                                                                                                                                                                                                                                                                                  |
| YP_615621 | Sala_0567 | ribosomal protein S13                                        | 91.80%            | 12                      |                                                                                                                                                                                                                                                                                                                                                                                                                                                                                                                                                                                                                                                                                                                                                                                                                                                                                                                                                                                                                                                                                                                                                                                                                                                                                                                                                                                                                                                                                                                                                                                                                                                                                                                                                                                                                                                                                                                                                                                                                                                                                                                                                                                                                                                                                                                                                                                                                                                                                                                                                                                                                                                                                                                                                                                                                                                                                                                                                                                                                                                                                                                                                                                                                                                                                                  |
| YP_615623 | Sala_0569 | peptidase U62, modulator of DNA gyrase                       | 40.27%            | 13                      |                                                                                                                                                                                                                                                                                                                                                                                                                                                                                                                                                                                                                                                                                                                                                                                                                                                                                                                                                                                                                                                                                                                                                                                                                                                                                                                                                                                                                                                                                                                                                                                                                                                                                                                                                                                                                                                                                                                                                                                                                                                                                                                                                                                                                                                                                                                                                                                                                                                                                                                                                                                                                                                                                                                                                                                                                                                                                                                                                                                                                                                                                                                                                                                                                                                                                                  |
| YP_615625 | Sala_0571 | hypothetical protein                                         | 41.09%            | 7                       |                                                                                                                                                                                                                                                                                                                                                                                                                                                                                                                                                                                                                                                                                                                                                                                                                                                                                                                                                                                                                                                                                                                                                                                                                                                                                                                                                                                                                                                                                                                                                                                                                                                                                                                                                                                                                                                                                                                                                                                                                                                                                                                                                                                                                                                                                                                                                                                                                                                                                                                                                                                                                                                                                                                                                                                                                                                                                                                                                                                                                                                                                                                                                                                                                                                                                                  |
| YP_615626 | Sala_0572 | Ubiquinone biosynthesis protein COQ7                         | 36.26%            | 5                       |                                                                                                                                                                                                                                                                                                                                                                                                                                                                                                                                                                                                                                                                                                                                                                                                                                                                                                                                                                                                                                                                                                                                                                                                                                                                                                                                                                                                                                                                                                                                                                                                                                                                                                                                                                                                                                                                                                                                                                                                                                                                                                                                                                                                                                                                                                                                                                                                                                                                                                                                                                                                                                                                                                                                                                                                                                                                                                                                                                                                                                                                                                                                                                                                                                                                                                  |
| YP_615628 | Sala_0574 | carboxyl-terminal protease                                   | 26.84%            | 7                       |                                                                                                                                                                                                                                                                                                                                                                                                                                                                                                                                                                                                                                                                                                                                                                                                                                                                                                                                                                                                                                                                                                                                                                                                                                                                                                                                                                                                                                                                                                                                                                                                                                                                                                                                                                                                                                                                                                                                                                                                                                                                                                                                                                                                                                                                                                                                                                                                                                                                                                                                                                                                                                                                                                                                                                                                                                                                                                                                                                                                                                                                                                                                                                                                                                                                                                  |
| YP_615633 | Sala_0579 | hypothetical protein                                         | 23.16%            | 3                       |                                                                                                                                                                                                                                                                                                                                                                                                                                                                                                                                                                                                                                                                                                                                                                                                                                                                                                                                                                                                                                                                                                                                                                                                                                                                                                                                                                                                                                                                                                                                                                                                                                                                                                                                                                                                                                                                                                                                                                                                                                                                                                                                                                                                                                                                                                                                                                                                                                                                                                                                                                                                                                                                                                                                                                                                                                                                                                                                                                                                                                                                                                                                                                                                                                                                                                  |
| YP_615635 | Sala_0581 | gamma-glutamyl phosphate reductase                           | 47.79%            | 11                      |                                                                                                                                                                                                                                                                                                                                                                                                                                                                                                                                                                                                                                                                                                                                                                                                                                                                                                                                                                                                                                                                                                                                                                                                                                                                                                                                                                                                                                                                                                                                                                                                                                                                                                                                                                                                                                                                                                                                                                                                                                                                                                                                                                                                                                                                                                                                                                                                                                                                                                                                                                                                                                                                                                                                                                                                                                                                                                                                                                                                                                                                                                                                                                                                                                                                                                  |
| YP_615636 | Sala_0582 | hypothetical protein                                         | 17.72%            | 4                       |                                                                                                                                                                                                                                                                                                                                                                                                                                                                                                                                                                                                                                                                                                                                                                                                                                                                                                                                                                                                                                                                                                                                                                                                                                                                                                                                                                                                                                                                                                                                                                                                                                                                                                                                                                                                                                                                                                                                                                                                                                                                                                                                                                                                                                                                                                                                                                                                                                                                                                                                                                                                                                                                                                                                                                                                                                                                                                                                                                                                                                                                                                                                                                                                                                                                                                  |
| YP_615637 | Sala_0583 | Enoyl-CoA hydratase/isomerase                                | 24.76%            | 5                       |                                                                                                                                                                                                                                                                                                                                                                                                                                                                                                                                                                                                                                                                                                                                                                                                                                                                                                                                                                                                                                                                                                                                                                                                                                                                                                                                                                                                                                                                                                                                                                                                                                                                                                                                                                                                                                                                                                                                                                                                                                                                                                                                                                                                                                                                                                                                                                                                                                                                                                                                                                                                                                                                                                                                                                                                                                                                                                                                                                                                                                                                                                                                                                                                                                                                                                  |
| YP_615638 | Sala_0584 | phosphoribosylaminimidazole-succinocarboxamide synthase      | 62.79%            | 15                      |                                                                                                                                                                                                                                                                                                                                                                                                                                                                                                                                                                                                                                                                                                                                                                                                                                                                                                                                                                                                                                                                                                                                                                                                                                                                                                                                                                                                                                                                                                                                                                                                                                                                                                                                                                                                                                                                                                                                                                                                                                                                                                                                                                                                                                                                                                                                                                                                                                                                                                                                                                                                                                                                                                                                                                                                                                                                                                                                                                                                                                                                                                                                                                                                                                                                                                  |



| Accession | Locus tag | Description                               | Sequence coverage | No. peptides identified | List of peptides identified                                                                                                                                                                                                                                                                                                                                                                                                                                                                                                                                                                                                                                                                                                                                                                                                                                                                                                                                                                                                                                                                                                                                                                                                                                                                                                                                                                                                                                                                                                                                                                                                                                                                                                                                                                                                                                                                                                                                                                                                                                                                                                                                                                                                                                                                                                                                                                                                                                                                                                                                                                                                                                                                                                                                                                                                                                                                                                                                                                                                                                                                                                                                                                                                                                                                                                 |
|-----------|-----------|-------------------------------------------|-------------------|-------------------------|-----------------------------------------------------------------------------------------------------------------------------------------------------------------------------------------------------------------------------------------------------------------------------------------------------------------------------------------------------------------------------------------------------------------------------------------------------------------------------------------------------------------------------------------------------------------------------------------------------------------------------------------------------------------------------------------------------------------------------------------------------------------------------------------------------------------------------------------------------------------------------------------------------------------------------------------------------------------------------------------------------------------------------------------------------------------------------------------------------------------------------------------------------------------------------------------------------------------------------------------------------------------------------------------------------------------------------------------------------------------------------------------------------------------------------------------------------------------------------------------------------------------------------------------------------------------------------------------------------------------------------------------------------------------------------------------------------------------------------------------------------------------------------------------------------------------------------------------------------------------------------------------------------------------------------------------------------------------------------------------------------------------------------------------------------------------------------------------------------------------------------------------------------------------------------------------------------------------------------------------------------------------------------------------------------------------------------------------------------------------------------------------------------------------------------------------------------------------------------------------------------------------------------------------------------------------------------------------------------------------------------------------------------------------------------------------------------------------------------------------------------------------------------------------------------------------------------------------------------------------------------------------------------------------------------------------------------------------------------------------------------------------------------------------------------------------------------------------------------------------------------------------------------------------------------------------------------------------------------------------------------------------------------------------------------------------------------|
| YP_615665 | Sala_0611 | protein of unknown function DUF448        | 46.03%            | 8                       | K.IGVISYDSSIDPVGACVGMK.G<br>R.SETRGPQIFLSR.A<br>R.RDQQIPR.E<br>R.QYQEFKDR.A<br>R.IASQITGK.Q<br>R.EEAARAER.R<br>R.ARYGAENDIR.A<br>K.QIDIMTEADASEK.R<br>K.IGVISYDSSIDPVGACVGMK.G<br>R.VSDTDSREPTGDTSAASAVSGAF.<br>R.ALHEGGFTIPDLDGAR.I<br>R.VGEDDEGSGR.E<br>R.LLLHASDAGDDGR.K<br>R.NDQLSQDTR.A<br>R.LALGPDGGIAPDVHKG.A<br>R.EVAVHLAIVDAR.A<br>R.KGMLISGNDKIEQAAR.R<br>K.GDVQGSVEAIVNALNK.L<br>R.FKDDVAEVR.A<br>R.APIIGFVWRPNAK.A<br>R.AAEGTVIEAK.L<br>R.GPVATILVR.R<br>R.GANVQAGEAGGITQHGAYQVK.A<br>R.FLYYDVIYHLTADVAK.E<br>R.EVVVPDITVQELANR.M<br>K.ANVIEYVVIK.G<br>R.GANVTDIVLVAAADDGLKPKQSEIAINHAK.A<br>K.LLDALQAEIMELK.A<br>R.VLGRGGEAAPTVEEAK.A<br>R.LTRDDVIVSATTIASLR.R<br>R.DKAAGLLVLEGSIR.K<br>R.PATASAAPAPR.R<br>K.VDKEGANPQR.V<br>K.TSLDLALR.G<br>R.TVEAGVQQQFSHGR.R<br>K.AAGLLVLEGSIR.K<br>R.VLHAGAGAITESDVTLAISTR.A<br>R.LLEHVLVEEMGGDVQNEVSALKK.T<br>R.HDEDVDDAAQLKPR.A<br>R.EVAAYRQEQALK.K<br>K.APEPAPTASAPDATAADAPPAEAGPVETAARPATASAAPAPR.R<br>K.AAGVPIIVAINK.V<br>R.PGEAAPTVEEAK.A<br>K.RTVEAGVQQQFSHGR.R<br>K.DGVSITFLDTPGHEAFTEMR.Q<br>K.AKDGSVITFLDTPGHEAFTEMR.Q<br>R.APVITIMGHVDHKG.T<br>K.QATSPMPVEVLGLGGVPMAGDTLIVVENEAR.A<br>K.MGMPVTVNTIQDQDAELLVTEFGHEIKR<br>R.AEVKDFPAGK.R<br>R.PAAPKPAAVDSLMTL.R<br>R.NTVVVEKRR.R<br>R.DDVVVSATTIASLR.R<br>K.VGDVIVCGAESGR.V<br>K.MGMPVTVNTIQDQDAELLVTEFGHEIKR.V<br>K.EMAGELGPER.I<br>K.AAGVPIIVAINKVDK.E<br>R.VSEADIDIRHDEDVDDAAQLKPR.A<br>R.VSEADIDIR.H<br>R.RFTVPEALK.R<br>R.QEQALK.K<br>R.MAALEENR.R<br>R.EIANREK.V<br>K.TGLDKLLDALQAEIMELK.A<br>K.PAADVSLMTR.Q<br>K.DVFPAGK.R<br>K.APEPAPTASAPDATAADAPPAEAGPVETAAR.P<br>K.ANPDRAAEGTVIEAK.L<br>R.HKEQSEGPSVR.V<br>R.GDVHDDVLATHPVSVTEVR.M<br>K.FLADDSFDEASHIDR.L<br>R.IFLPHGDAVAASLR.A<br>R.IGAGAYPLLR.A<br>R.IATSLLAASPR.P<br>R.TVAALTDADDATR.L<br>R.AFDTSGLVGR.I<br>R.VTILTDPTER.H<br>R.GGAYAI PVGEAEAAVGFSLYDPLIDAGLGAEDMAER.R<br>R.IDALEIAAIPDR.V<br>R.TLALRPDITR.Q<br>R.IATSLLAASPR.LL<br>R.GGAYAI PVGEAEAAVGFSLYDPLIDAGLGAEDMAER.I<br>R.DELDAKAGALAR.I<br>K.APALPEGLR.D<br>R.AIELGVEKVDLTLAR.A<br>R.IGSTLDAGLNIGTFHLGR.R<br>R.ADFITLHTPLTDQTR.N<br>K.VVAFDPFLTER.A<br>R.AGIGVDNIDPEASKK.G<br>R.AGIGVDNIDPEASK.K<br>K.VTADVLAATK.L<br>R.SVAGTLFGNNEPR.L<br>R.VTATEAGDR.S<br>K.TRDELIAMIGDYDGLAIR.S<br>R.VSDSVNMINAPHLAR.E<br>K.NDFMGVELTSK.T<br>R.QIPEANALTOAGK.W<br>K.VDLTLAR.A<br>R.HDREGDYHTLVR.V<br>R.GGLDEAALK.D<br>R.QIPEANALTOAGKWPKN<br>K.VEADLDGDMLYVNEADAPGFGR.I<br>K.LRPMYSLAEK.L<br>K.GVVVMNTFFGNSITTAEHAIAMMFALAR.Q<br>R.GIRVDEITGK.T<br>K.MKVAFDPFLTER.A<br>R.RYSDSVNMINAPHLAR.E<br>R.DELIAMIGDYDGLAIR.S<br>R.VSDSVNMINAPHLAR.E<br>K.TLGLGCGNIGSIVAR.A<br>K.NDFMGVELTSK.T<br>R.VDEITGK.T<br>R.RAAGGEAVLLSLDSPMPELLWVQCQLPGVK.M<br>R.RAAGGEAVLLSLDSPMPELLWVQCQLPGVK.M<br>R.EDGYHTLVR.V<br>R.AIELGVEK.V<br>K.VEADLDGDMLYVNEADAPGFGR.I<br>K.TRDELIAMIGDYDGLAIR.S<br>K.LRPMYSLAEK.L<br>K.KGVVVMNTFFGNSITTAEHAIAMMFALAR.Q<br>K.GVVVMNTFFGNSITTAEHAIAMMFALAR.Q<br>R.PVTALAWESFGGVTWDAKQ<br>K.VLGGEGGHVLLGPR.A<br>R.AGLSFADATSAVFAYDLPWDKIDVATFSWQK.V<br>K.EGAAYDIAGYR.D<br>R.LETHTPAWPLK.V<br>K.GETINTPSMLAVEDAIFALEWAK.S<br>R.SDANAALDKIVEER.D<br>R.IGVPGSDTGAFEMAMWMLGAR.P<br>R.DWLSHLAADPASR.S<br>R.SDANAALDK.I<br>R.ADYGQLPDLTQVDWSNDVLTWNGTSGVR.V<br>R.VPNGDWIADDR.A<br>K.IVEERDWSHLAADPASR.S<br>K.GALAEVGFKGETINTPSMLAVEDAIFALEWAK.S<br>R.AGLSFADATSAVFAYDLPWDK.I<br>K.TFAGLLEGAAYDIAGYR.D |
| YP_615666 | Sala_0612 | translation initiation factor IF-2        | 68.40%            | 51                      |                                                                                                                                                                                                                                                                                                                                                                                                                                                                                                                                                                                                                                                                                                                                                                                                                                                                                                                                                                                                                                                                                                                                                                                                                                                                                                                                                                                                                                                                                                                                                                                                                                                                                                                                                                                                                                                                                                                                                                                                                                                                                                                                                                                                                                                                                                                                                                                                                                                                                                                                                                                                                                                                                                                                                                                                                                                                                                                                                                                                                                                                                                                                                                                                                                                                                                                             |
| YP_615667 | Sala_0613 | ribosome-binding factor A                 | 33.09%            | 3                       |                                                                                                                                                                                                                                                                                                                                                                                                                                                                                                                                                                                                                                                                                                                                                                                                                                                                                                                                                                                                                                                                                                                                                                                                                                                                                                                                                                                                                                                                                                                                                                                                                                                                                                                                                                                                                                                                                                                                                                                                                                                                                                                                                                                                                                                                                                                                                                                                                                                                                                                                                                                                                                                                                                                                                                                                                                                                                                                                                                                                                                                                                                                                                                                                                                                                                                                             |
| YP_615669 | Sala_0615 | tRNA synthetase, class II (G, H, P and S) | 43.51%            | 13                      |                                                                                                                                                                                                                                                                                                                                                                                                                                                                                                                                                                                                                                                                                                                                                                                                                                                                                                                                                                                                                                                                                                                                                                                                                                                                                                                                                                                                                                                                                                                                                                                                                                                                                                                                                                                                                                                                                                                                                                                                                                                                                                                                                                                                                                                                                                                                                                                                                                                                                                                                                                                                                                                                                                                                                                                                                                                                                                                                                                                                                                                                                                                                                                                                                                                                                                                             |
| YP_615670 | Sala_0616 | D-3-phosphoglycerate dehydrogenase        | 60.42%            | 37                      |                                                                                                                                                                                                                                                                                                                                                                                                                                                                                                                                                                                                                                                                                                                                                                                                                                                                                                                                                                                                                                                                                                                                                                                                                                                                                                                                                                                                                                                                                                                                                                                                                                                                                                                                                                                                                                                                                                                                                                                                                                                                                                                                                                                                                                                                                                                                                                                                                                                                                                                                                                                                                                                                                                                                                                                                                                                                                                                                                                                                                                                                                                                                                                                                                                                                                                                             |
| YP_615671 | Sala_0617 | phosphoserine aminotransferase            | 86.97%            | 35                      |                                                                                                                                                                                                                                                                                                                                                                                                                                                                                                                                                                                                                                                                                                                                                                                                                                                                                                                                                                                                                                                                                                                                                                                                                                                                                                                                                                                                                                                                                                                                                                                                                                                                                                                                                                                                                                                                                                                                                                                                                                                                                                                                                                                                                                                                                                                                                                                                                                                                                                                                                                                                                                                                                                                                                                                                                                                                                                                                                                                                                                                                                                                                                                                                                                                                                                                             |

| Accession | Locus tag | Description                                                             | Sequence coverage | No. peptides identified | List of peptides identified                                                                                                                                                                                                                                                                                                                                                                                                                                                                                                                                                                                                                                                                                                                                                                                                                                                                                                                                                                                                                                                                                                                                                                                                                                                                                                                                                                                                                                                                                                                                                                                                                                                                                                                                                                                                                                                                                                                                                                                                                                                                                                                                                                                                                                                                                                                                                                                                                                                                                                                                                                                                                                                                                                                                                                                                                                                                                                                                                                                                                                                                                                                                                                                                                                                                                                                                                                           |
|-----------|-----------|-------------------------------------------------------------------------|-------------------|-------------------------|-------------------------------------------------------------------------------------------------------------------------------------------------------------------------------------------------------------------------------------------------------------------------------------------------------------------------------------------------------------------------------------------------------------------------------------------------------------------------------------------------------------------------------------------------------------------------------------------------------------------------------------------------------------------------------------------------------------------------------------------------------------------------------------------------------------------------------------------------------------------------------------------------------------------------------------------------------------------------------------------------------------------------------------------------------------------------------------------------------------------------------------------------------------------------------------------------------------------------------------------------------------------------------------------------------------------------------------------------------------------------------------------------------------------------------------------------------------------------------------------------------------------------------------------------------------------------------------------------------------------------------------------------------------------------------------------------------------------------------------------------------------------------------------------------------------------------------------------------------------------------------------------------------------------------------------------------------------------------------------------------------------------------------------------------------------------------------------------------------------------------------------------------------------------------------------------------------------------------------------------------------------------------------------------------------------------------------------------------------------------------------------------------------------------------------------------------------------------------------------------------------------------------------------------------------------------------------------------------------------------------------------------------------------------------------------------------------------------------------------------------------------------------------------------------------------------------------------------------------------------------------------------------------------------------------------------------------------------------------------------------------------------------------------------------------------------------------------------------------------------------------------------------------------------------------------------------------------------------------------------------------------------------------------------------------------------------------------------------------------------------------------------------------|
|           |           |                                                                         |                   |                         | K.IDVATFSWQK.V<br>R.EMLQPDTHR.I<br>K.EGAAYDIAGYRDAPPGLR.I<br>R.SKTSVCLSVAGADADFIK.T<br>R.SDANAALDKIVEERDWSLHAAADPASR.S<br>R.LAYCIDLMR.E<br>R.IWCGATVDADIEALGPWLWDWAYVSLK.S<br>R.IGIVPGSDTGAFEMAMWMLGAR.P<br>R.IGIVPGSDTGAFEMAMWMLGAR.P<br>R.IGIVPGSDTGAFEMAMWMLGAR.P<br>K.GETINTPSMLAVEDAIFALEWAK.S<br>K.ARSDANAALDK.I<br>R.LDPTIIR.A<br>R.IWCGATVDADIEALGPWLWDWAYVSLK.S<br>R.IGIVPGSDTGAFEMAMWMLGAR.P<br>R.IGIVPGSDTGAFEMAMWMLGAR.P<br>K.TSVCLSVAGADADFIK.T<br>K.TFAGLLEK.E<br>K.QLRLDPTIIR.A<br>R.IPEPGEADALEAAATDDATR.N<br>K.AKDDAQFAQQATTTPQTAHPAYR.L<br>R.VVNFALVEEGVYSAR.D<br>R.DLGLQFVETADEAWK.I<br>K.IKPIPIVLFGE.E<br>R.LAFQDNDFLLR.E<br>K.IIQDFYANIEEQH.<br>R.ESIGLNVLPHEQAPNR.F<br>R.GAADDEGRESIGLNVLPHEQAPNR.F<br>K.DDAQFAQQATTTPQTAHPAYR.L<br>R.FQLELLKPELLLDEAGIESTLVYGSAR.I<br>R.HGIGPNLHGVGAPVAAK.A<br>K.GGVWDEAALDAYLK.A<br>K.ALILYLQAKQ.<br>K.AGFSYSGAMK.A<br>K.AHGHPVFAVSEALK.S<br>K.MSFAGLSPEDR.A<br>K.SVPGNWDVAFMDEWLK.S<br>K.MSFAGLSPEDR.A<br>R.GLAFQGAPGANSDLAAR.E<br>K.LESYQIGSGFAATK.F<br>R.ALEELDFQTK.S<br>R.VADHIFLLPESGLSIVGEHFLPIR.Y<br>K.FYADIVGAPGDER.V<br>R.ALALAEPAR.G<br>K.FYADIVGAPGDERVDR.A<br>R.LLGYTPQAR.P<br>R.EYDPNLSLPLCYAFEDAIDAVR.E<br>R.AIIPISLHGR.V<br>K.ALGGFATNGVNMTK.L<br>K.LPLFVIGEAR.P<br>R.SETIVPGPTADDLAFVAANK.L<br>R.QSLPAPPGDTLAVWR.L<br>R.TIGVEIGEIPWRD.<br>R.LSSTDPNLQNIPIR.T<br>K.FGVTPDLVGDVLMGSDVNDVPGVR.G<br>R.FPGISDYSIDTLETAR.A<br>K.SQISFAEVQLDR.A<br>R.IEGEHALAGQPFAGSPPR.Q<br>R.AAHNAPIQIGTSADLTK.R<br>R.AAHVAVQDTETASLDSVYGR.L<br>R.VHTSYSLVGAQTGR.L<br>R.LGALFADDVVK.V<br>R.MPGALADAGLADVK.M<br>R.GVPVGVAVYTTMLWK.L<br>R.DAFIAAPGHVLAADYSQIELR.L<br>R.ARYETVTTEALDR.W<br>K.LSVPLEVEIGTKSWGDAH.<br>K.LDLGTAPAGPPTLPR.A<br>R.LEITPDEAQUALISR.Y<br>K.STYTDALQEQVNTTGR.V<br>K.SGDWSTQNELEL.L<br>K.LSGEFANEMLR.I<br>R.YETVTTEALDR.W<br>R.LVGSVSLTGAGK.A<br>R.LGIDAVNEK.F<br>R.ATEYAAEDAEEVAWR.L<br>K.IVNFSLVIGISR.W<br>K.LSVPLEVEIGTK.S<br>K.LKSTYTDALQEQVNTTGR.V<br>K.LFLDEHGFR.S<br>K.HQHGLDELA.L<br>K.ANRDPDPEDLVQFPLIR.D<br>K.AAAGEVIR.A<br>K.WEEGAETLAPSIELVGKI.<br>K.AWHDSSPAIGK.I<br>K.WEEGAETLAPSIELVGK.I<br>K.IAYHMLGDQNHVLANFVGLR.E<br>K.FVPTDADVK.G<br>R.NAGELVR.K<br>K.FVPTDADVKG.W<br>K.IAYHMLGDQNHVLANFVGLREDSGADR.A<br>R.EDSGLADRATFVDPDGVQVMEITCEGVGR.N<br>R.ATFVDPDGVQVMEITCEGVGR.N<br>R.ATFVDPDGVQVMEITCEGVGR.N<br>R.ANPGQVCPAKWEEGAETLAPSIELVGKI.<br>R.ANPGQVCPAKWEEGAETLAPSIELVGK.I<br>K.IAYHMLGDQNHVLANFVGLR.E<br>R.EDSGLADR.A<br>K.PFSATSYHQGK.F<br>K.IAYHMLGDQNHVLANFVGLREDSGADR.A<br>R.GATSQGIFAGDVTTPYK.Q<br>K.LGSLPNVTVTSALTTEVLNGEK.V<br>R.FGGQLDITLGDINFSVQHTEGPK.L<br>R.ALVEEVAQSDR.I<br>K.ASLAFHLIR.A<br>R.HPIELVASLDASPK.S<br>K.IAAKEPFDLVVGGGGGAAAAIYAAR.K<br>K.LAAQLEAHVK.D<br>R.HTAIDGALFQDEVERR.Q<br>K.DYDVMNAQEAALIPGGANGLHEVK.L<br>R.MDLAQIVAK.L<br>R.HTAIDGALFQDEVERR.R<br>K.EPFDLVVGGGGGAAAAIYAAR.K<br>R.VAVVIGGGNSVGAALDLAGLVAHVTLIEFDSQLR.A<br>R.RPSFAIR.G<br>R.GTDEHLEIEGIFVQIQLVNPTEWLGDAVALSGR.G<br>R.ADALQTK.L<br>K.TVILSTGAR.W<br>K.AAGNFFIALIGVPR.D<br>K.ASNHQPHDHTDWDVWPEGR.<br>R.CSPATFNSSDK.A<br>K.HINLTGSDFDPSQFPPR.F<br>K.GVILSGSPASVPAEGSPR.A<br>R.EAGVSEIVPFSAAEAALAR.M<br>R.VVYDYSKPPGTIEWE.<br>K.FIGAEFINVFEERAR.K<br>R.IINEVQGNR.V<br>R.DHYNIPVAVDAER.F<br>R.AVTSTDMTADIVPFDASFLSR.C<br>R.YYGTQFHPEVHTPDGAK.L<br>K.SHHNVGGLPER.M<br>R.KADAVYLEEIR.N<br>K.ELGLPDIQVGR.H<br>K.ADAVYLEEIR.N<br>R.KIGGADFLAQGTLPDVIESVSFTGGPSVTIK.S<br>R.IVAVSDGAPFAVIANDER.R<br>R.FMAGLAGITDPEQK.R |
| YP_615673 | Sala_0619 | conserved hypothetical protein 730                                      | 55.67%            | 11                      |                                                                                                                                                                                                                                                                                                                                                                                                                                                                                                                                                                                                                                                                                                                                                                                                                                                                                                                                                                                                                                                                                                                                                                                                                                                                                                                                                                                                                                                                                                                                                                                                                                                                                                                                                                                                                                                                                                                                                                                                                                                                                                                                                                                                                                                                                                                                                                                                                                                                                                                                                                                                                                                                                                                                                                                                                                                                                                                                                                                                                                                                                                                                                                                                                                                                                                                                                                                                       |
| YP_615674 | Sala_0620 | cytochrome c, class I                                                   | 35.37%            | 4                       |                                                                                                                                                                                                                                                                                                                                                                                                                                                                                                                                                                                                                                                                                                                                                                                                                                                                                                                                                                                                                                                                                                                                                                                                                                                                                                                                                                                                                                                                                                                                                                                                                                                                                                                                                                                                                                                                                                                                                                                                                                                                                                                                                                                                                                                                                                                                                                                                                                                                                                                                                                                                                                                                                                                                                                                                                                                                                                                                                                                                                                                                                                                                                                                                                                                                                                                                                                                                       |
| YP_615675 | Sala_0621 | cytochrome c, class I                                                   | 20.28%            | 4                       |                                                                                                                                                                                                                                                                                                                                                                                                                                                                                                                                                                                                                                                                                                                                                                                                                                                                                                                                                                                                                                                                                                                                                                                                                                                                                                                                                                                                                                                                                                                                                                                                                                                                                                                                                                                                                                                                                                                                                                                                                                                                                                                                                                                                                                                                                                                                                                                                                                                                                                                                                                                                                                                                                                                                                                                                                                                                                                                                                                                                                                                                                                                                                                                                                                                                                                                                                                                                       |
| YP_615676 | Sala_0622 | Prephenate dehydratase                                                  | 49.49%            | 11                      |                                                                                                                                                                                                                                                                                                                                                                                                                                                                                                                                                                                                                                                                                                                                                                                                                                                                                                                                                                                                                                                                                                                                                                                                                                                                                                                                                                                                                                                                                                                                                                                                                                                                                                                                                                                                                                                                                                                                                                                                                                                                                                                                                                                                                                                                                                                                                                                                                                                                                                                                                                                                                                                                                                                                                                                                                                                                                                                                                                                                                                                                                                                                                                                                                                                                                                                                                                                                       |
| YP_615678 | Sala_0624 | hypothetical protein                                                    | 36.20%            | 4                       |                                                                                                                                                                                                                                                                                                                                                                                                                                                                                                                                                                                                                                                                                                                                                                                                                                                                                                                                                                                                                                                                                                                                                                                                                                                                                                                                                                                                                                                                                                                                                                                                                                                                                                                                                                                                                                                                                                                                                                                                                                                                                                                                                                                                                                                                                                                                                                                                                                                                                                                                                                                                                                                                                                                                                                                                                                                                                                                                                                                                                                                                                                                                                                                                                                                                                                                                                                                                       |
| YP_615679 | Sala_0625 | DNA polymerase I                                                        | 42.58%            | 30                      |                                                                                                                                                                                                                                                                                                                                                                                                                                                                                                                                                                                                                                                                                                                                                                                                                                                                                                                                                                                                                                                                                                                                                                                                                                                                                                                                                                                                                                                                                                                                                                                                                                                                                                                                                                                                                                                                                                                                                                                                                                                                                                                                                                                                                                                                                                                                                                                                                                                                                                                                                                                                                                                                                                                                                                                                                                                                                                                                                                                                                                                                                                                                                                                                                                                                                                                                                                                                       |
| YP_615683 | Sala_0629 | alkyl hydroperoxide reductase/ Thiol specific antioxidant/ Mal allergen | 68.98%            | 17                      |                                                                                                                                                                                                                                                                                                                                                                                                                                                                                                                                                                                                                                                                                                                                                                                                                                                                                                                                                                                                                                                                                                                                                                                                                                                                                                                                                                                                                                                                                                                                                                                                                                                                                                                                                                                                                                                                                                                                                                                                                                                                                                                                                                                                                                                                                                                                                                                                                                                                                                                                                                                                                                                                                                                                                                                                                                                                                                                                                                                                                                                                                                                                                                                                                                                                                                                                                                                                       |
| YP_615684 | Sala_0630 | FAD-dependent pyridine nucleotide-disulphide oxidoreductase             | 55.19%            | 18                      |                                                                                                                                                                                                                                                                                                                                                                                                                                                                                                                                                                                                                                                                                                                                                                                                                                                                                                                                                                                                                                                                                                                                                                                                                                                                                                                                                                                                                                                                                                                                                                                                                                                                                                                                                                                                                                                                                                                                                                                                                                                                                                                                                                                                                                                                                                                                                                                                                                                                                                                                                                                                                                                                                                                                                                                                                                                                                                                                                                                                                                                                                                                                                                                                                                                                                                                                                                                                       |
| YP_615685 | Sala_0631 | glutathione-dependent formaldehyde-activating, GFA                      | 37.65%            | 4                       |                                                                                                                                                                                                                                                                                                                                                                                                                                                                                                                                                                                                                                                                                                                                                                                                                                                                                                                                                                                                                                                                                                                                                                                                                                                                                                                                                                                                                                                                                                                                                                                                                                                                                                                                                                                                                                                                                                                                                                                                                                                                                                                                                                                                                                                                                                                                                                                                                                                                                                                                                                                                                                                                                                                                                                                                                                                                                                                                                                                                                                                                                                                                                                                                                                                                                                                                                                                                       |
| YP_615688 | Sala_0634 | GMP synthase-like protein                                               | 66.29%            | 27                      |                                                                                                                                                                                                                                                                                                                                                                                                                                                                                                                                                                                                                                                                                                                                                                                                                                                                                                                                                                                                                                                                                                                                                                                                                                                                                                                                                                                                                                                                                                                                                                                                                                                                                                                                                                                                                                                                                                                                                                                                                                                                                                                                                                                                                                                                                                                                                                                                                                                                                                                                                                                                                                                                                                                                                                                                                                                                                                                                                                                                                                                                                                                                                                                                                                                                                                                                                                                                       |

| Accession | Locus tag | Description                                    | Sequence coverage | No. peptides identified | List of peptides identified                                                                                                                                                                                                                                                                                                                                                                                                                                                                                                                                                                                                                                                                                                                                                                                                                                                                                                                                                                                                                                                                                                                                                                                                                                                                                                                                                                                                                                                                                                                                                                                                                                                                                                                                                                                                                                                                                                                                                                                                                                                                                                                                                                                                                                                                                                                                                                                                                                                                                                                                                                                                                                                                                                                                                                                                                                                                                                                                                                                                                                                                                                                                                                                                                                                                                                                                                                   |
|-----------|-----------|------------------------------------------------|-------------------|-------------------------|-----------------------------------------------------------------------------------------------------------------------------------------------------------------------------------------------------------------------------------------------------------------------------------------------------------------------------------------------------------------------------------------------------------------------------------------------------------------------------------------------------------------------------------------------------------------------------------------------------------------------------------------------------------------------------------------------------------------------------------------------------------------------------------------------------------------------------------------------------------------------------------------------------------------------------------------------------------------------------------------------------------------------------------------------------------------------------------------------------------------------------------------------------------------------------------------------------------------------------------------------------------------------------------------------------------------------------------------------------------------------------------------------------------------------------------------------------------------------------------------------------------------------------------------------------------------------------------------------------------------------------------------------------------------------------------------------------------------------------------------------------------------------------------------------------------------------------------------------------------------------------------------------------------------------------------------------------------------------------------------------------------------------------------------------------------------------------------------------------------------------------------------------------------------------------------------------------------------------------------------------------------------------------------------------------------------------------------------------------------------------------------------------------------------------------------------------------------------------------------------------------------------------------------------------------------------------------------------------------------------------------------------------------------------------------------------------------------------------------------------------------------------------------------------------------------------------------------------------------------------------------------------------------------------------------------------------------------------------------------------------------------------------------------------------------------------------------------------------------------------------------------------------------------------------------------------------------------------------------------------------------------------------------------------------------------------------------------------------------------------------------------------------|
|           |           |                                                |                   |                         | R.VREAGVYSEIVPFSAAEAALR.M<br>R.KFIGAEFINVFEER.K<br>K.IGGADFLAQGLYLPDVIQSVFTGGPSVTIK.S<br>R.NAGLDAIWAQFAVLLPKV.T<br>R.SIFDGLPILGICYGQQVMSQQLGK.V<br>R.IVAUSDGAPFAVANDERR.Y<br>R.AFLTVEPCVDFDLGWQVGER.H<br>K.LVEPLRELFKDEVR.L<br>R.TYDHYCALR.A<br>R.FMAGLAGITDPEQK.R<br>K.VEPGIDGERDGEFGR.A<br>K.FIGAEFINVFEER.K<br>R.FQSEVPSFLAITER.G<br>R.DLPGVGSGLTVPLLDYAVGK.I<br>K.VVEFPFEVALQYGSADER.V<br>K.LTDVTLRSPVPELDDGSATGSGGSSNR.H<br>R.ADGVTTTDLR.D<br>K.SHDTANSFLLTPEIAAFDR.V<br>R.WSVTGNVADADQRTFTDR.I<br>R.WSVTGNVADADQRT.T<br>R.LDQDTLTLGPGGPGVGDPLTR.D<br>R.LAIDNVFDAQK.K<br>K.VTDSASINLR.L<br>R.TALATPVIDEAIAGAVR.A<br>R.NYGEVQLDISPR.A<br>K.LLSFTGSPGVWDLK.A<br>K.FTDWDAALAEVNSK.F<br>K.FGLQAGLFTTR.D<br>R.DGADLFTTDER.L<br>K.VLTAWDHLVGGIVNDVSSYR.V<br>R.DTFIPMISAR.E<br>K.LKDVVPLVNLNK.A<br>K.FTDWDAALAEVNSKFLQAGLFTTR.D<br>R.LAAEATR.N<br>R.FDELALVCVEAGKPIADSEGEVTR.L<br>R.DGADLFTTDER.L<br>R.DADLHALER.I<br>R.AIHADVDR.F<br>K.AAQPNSDLVTDKYTEIAFR.T<br>R.YAESYGASGHR.V<br>K.DWGLYGNDFVRL.Y<br>K.DERFPFPPYLVQQR.D<br>R.KAEVHTAPLAK.D<br>R.DGPTVHVSTK.T<br>K.TAEVDPVYFDIEVIGDIANAVQMK.E<br>R.AWDFDQEEQQLDAAR.L<br>R.TLRADQVAER.G<br>R.GFADSYALR.M<br>R.APQGTETGLSLVR.E<br>R.GRPIAIAISADILAR.T<br>K.EAGGDLTALSMLLDQAAFAETAK.I<br>R.VPDLPAVFDGDTLAILAGFK.Y<br>R.VFGEDLPRESYAK.<br>K.VPDTDDTTVANMVK.V<br>K.STHIEQVAAR.L<br>R.LFSTANTVGLGDTSGLYHGTQQINQGQMDR.W<br>R.VIRPNPWR.L<br>R.DAIVLKDGGQVTEFR.E<br>K.VPAFSEADAR.V<br>K.DGGQVTEFR.E<br>R.TVISWAQNTAIFHNIGFAFR.L<br>R.MIVAEYQR.V<br>R.WNIVVTLNLYPAATESAIVLAK.V<br>R.QGFINGDISTVMSPR.T<br>K.VPAFSEADARVFDLPAVFDGDTLAILAGFK.Y<br>R.WWQYHYGTGK.S<br>R.EGLLPWALQTPALVFDEYDAGRPMVMFVQR.V<br>K.LTLQNR.V<br>R.VLETEGKTLTLDQNR.V<br>R.VNLDAHISR.I<br>R.VMVGHYGTGK.S<br>R.MIVAEYQR.V<br>R.LFSTANTVGLGDTSGLYHGTQQINQGQMDR.W<br>R.EVFGVDIMKVPFSEADAR.V<br>R.WLTGYSQTELEGR.I<br>R.YLDKIDELAK.G<br>R.FPLVPGDSEEFPIPEVPK.T<br>R.AVALGDSALDGEPLDR.H<br>R.VMLLGGEAFTPR.H<br>R.HVWVNFVSSSR.D<br>K.AGRFPLVPGDSEEFPIPEVPK.T<br>K.AQAEAGAAYAAR.V<br>K.TVIGSVPLASR.S<br>R.FGLSLDDVAADASSALPALPALR.A<br>R.LIEPLGMSLTIPFPAK.G<br>R.YAAGFGPDSK.L<br>R.ADALFADAEAVGQTR.A<br>K.PAAQPEVFNYSATSILSDIADTLTPSESPDR.R<br>K.GGDILYIATAPGTGASGADVSR.A<br>R.VDAFDRDPTGNPAVMPLEWLDATL.R<br>R.AJAEENLSETAFLVPEDESGADYELR.W<br>R.DAFAAYQASAR.G<br>R.ALGGQVETLWHEGGYAVIVPDAASV.R<br>R.IEGSVAPVDNADAYFATR.S<br>R.DSQIGAWASDQSRPLDSR.A<br>K.GHGPQFVFTNLSR.K<br>R.DSQIGAWASDQSR.P<br>R.IEFWQDR.A<br>K.GGELAANPHVALLFHVK.S<br>R.KGGELAANPHVALLFHVK.S<br>R.ASEPNDSNAMALATATPDGRPSLR.M<br>R.LSVSFDIATQAPQR.I<br>R.LDLVTLAEVK.G<br>R.ITLADGGTIDLK.L<br>R.IMVDLPADDAALVK.L<br>R.DGANIRLDLPVTLAEVK.G<br>R.ITLADGGTIDLKLPAGVETGTQMR.L<br>R.AQGGFSGFGNDGADFDIFGLFGGR.G<br>R.AQFDRSEIDAGNPAAMPFGYGGAGFR.G<br>K.LPAGVETGTQMR.L<br>K.GQPGGGHGDVITIVK.D<br>R.GGGPFGGGR.S<br>K.VKVPVDPVMLISIPAGSSSGK.V<br>K.SGGRGDLVR.I<br>K.AYDILLSKAK.R<br>K.AYDILLSK.A<br>R.VNAISAGPIK.T<br>K.YLANDYGPQGR.V<br>R.WPTIDFVVAIGYTNK.E<br>K.TLAASGIDFR.L<br>K.WNEYNAPLR.R<br>R.AAAMMAPFDPETGAGGSLTLYSAGK.V<br>R.GLIMGLANDK.S<br>R.VKPLADQLGCDLIDCDVSDMDLDAAFGSLAR.W<br>R.NVTIDVGSALYLLSDASGVTGTHHVDAGYHTIGMK.Q<br>K.TLAASGIDFR.LL.K.W<br>K.SJAWGJAK.A<br>K.ALHANGAELALSYQEVMAK.R<br>R.VAFKPTISILTPVTVNK.A<br>R.LSLSEADIQPFLDKR.R<br>R.LSLSEADIQPFLDKR.R<br>K.AGEATDIVTR.G<br>K.TTGTISLMIENVDQR.S<br>K.GVEIGAGFYAR.L<br>K.AGSSLGAVIECAASGVPAWGAPVYAK.L<br>R.KAGSSLGAVIECAASGVPAWGAPVYAK.L<br>K.LSDLAAMMGINAVK.G |
| YP_615689 | Sala_0635 | TonB-dependent receptor                        | 22.47%            | 11                      |                                                                                                                                                                                                                                                                                                                                                                                                                                                                                                                                                                                                                                                                                                                                                                                                                                                                                                                                                                                                                                                                                                                                                                                                                                                                                                                                                                                                                                                                                                                                                                                                                                                                                                                                                                                                                                                                                                                                                                                                                                                                                                                                                                                                                                                                                                                                                                                                                                                                                                                                                                                                                                                                                                                                                                                                                                                                                                                                                                                                                                                                                                                                                                                                                                                                                                                                                                                               |
| YP_615692 | Sala_0638 | aldehyde dehydrogenase                         | 42.56%            | 16                      |                                                                                                                                                                                                                                                                                                                                                                                                                                                                                                                                                                                                                                                                                                                                                                                                                                                                                                                                                                                                                                                                                                                                                                                                                                                                                                                                                                                                                                                                                                                                                                                                                                                                                                                                                                                                                                                                                                                                                                                                                                                                                                                                                                                                                                                                                                                                                                                                                                                                                                                                                                                                                                                                                                                                                                                                                                                                                                                                                                                                                                                                                                                                                                                                                                                                                                                                                                                               |
| YP_615693 | Sala_0639 | thiamine pyrophosphate enzyme-like TPP-binding | 16.24%            | 6                       |                                                                                                                                                                                                                                                                                                                                                                                                                                                                                                                                                                                                                                                                                                                                                                                                                                                                                                                                                                                                                                                                                                                                                                                                                                                                                                                                                                                                                                                                                                                                                                                                                                                                                                                                                                                                                                                                                                                                                                                                                                                                                                                                                                                                                                                                                                                                                                                                                                                                                                                                                                                                                                                                                                                                                                                                                                                                                                                                                                                                                                                                                                                                                                                                                                                                                                                                                                                               |
| YP_615696 | Sala_0642 | Cobalt chelatase, CobT subunit                 | 14.50%            | 6                       |                                                                                                                                                                                                                                                                                                                                                                                                                                                                                                                                                                                                                                                                                                                                                                                                                                                                                                                                                                                                                                                                                                                                                                                                                                                                                                                                                                                                                                                                                                                                                                                                                                                                                                                                                                                                                                                                                                                                                                                                                                                                                                                                                                                                                                                                                                                                                                                                                                                                                                                                                                                                                                                                                                                                                                                                                                                                                                                                                                                                                                                                                                                                                                                                                                                                                                                                                                                               |
| YP_615698 | Sala_0644 | cobalt chelatase, pCobS small subunit          | 84.19%            | 23                      |                                                                                                                                                                                                                                                                                                                                                                                                                                                                                                                                                                                                                                                                                                                                                                                                                                                                                                                                                                                                                                                                                                                                                                                                                                                                                                                                                                                                                                                                                                                                                                                                                                                                                                                                                                                                                                                                                                                                                                                                                                                                                                                                                                                                                                                                                                                                                                                                                                                                                                                                                                                                                                                                                                                                                                                                                                                                                                                                                                                                                                                                                                                                                                                                                                                                                                                                                                                               |
| YP_615702 | Sala_0648 | hypothetical protein                           | 19.67%            | 2                       |                                                                                                                                                                                                                                                                                                                                                                                                                                                                                                                                                                                                                                                                                                                                                                                                                                                                                                                                                                                                                                                                                                                                                                                                                                                                                                                                                                                                                                                                                                                                                                                                                                                                                                                                                                                                                                                                                                                                                                                                                                                                                                                                                                                                                                                                                                                                                                                                                                                                                                                                                                                                                                                                                                                                                                                                                                                                                                                                                                                                                                                                                                                                                                                                                                                                                                                                                                                               |
| YP_615703 | Sala_0649 | Pirin-like protein                             | 21.77%            | 5                       |                                                                                                                                                                                                                                                                                                                                                                                                                                                                                                                                                                                                                                                                                                                                                                                                                                                                                                                                                                                                                                                                                                                                                                                                                                                                                                                                                                                                                                                                                                                                                                                                                                                                                                                                                                                                                                                                                                                                                                                                                                                                                                                                                                                                                                                                                                                                                                                                                                                                                                                                                                                                                                                                                                                                                                                                                                                                                                                                                                                                                                                                                                                                                                                                                                                                                                                                                                                               |
| YP_615705 | Sala_0651 | hypothetical protein                           | 17.14%            | 2                       |                                                                                                                                                                                                                                                                                                                                                                                                                                                                                                                                                                                                                                                                                                                                                                                                                                                                                                                                                                                                                                                                                                                                                                                                                                                                                                                                                                                                                                                                                                                                                                                                                                                                                                                                                                                                                                                                                                                                                                                                                                                                                                                                                                                                                                                                                                                                                                                                                                                                                                                                                                                                                                                                                                                                                                                                                                                                                                                                                                                                                                                                                                                                                                                                                                                                                                                                                                                               |
| YP_615706 | Sala_0652 | beta-lactamase                                 | 27.15%            | 5                       |                                                                                                                                                                                                                                                                                                                                                                                                                                                                                                                                                                                                                                                                                                                                                                                                                                                                                                                                                                                                                                                                                                                                                                                                                                                                                                                                                                                                                                                                                                                                                                                                                                                                                                                                                                                                                                                                                                                                                                                                                                                                                                                                                                                                                                                                                                                                                                                                                                                                                                                                                                                                                                                                                                                                                                                                                                                                                                                                                                                                                                                                                                                                                                                                                                                                                                                                                                                               |
| YP_615707 | Sala_0653 | Phenazine biosynthesis PhzC/PhzF protein       | 43.59%            | 5                       |                                                                                                                                                                                                                                                                                                                                                                                                                                                                                                                                                                                                                                                                                                                                                                                                                                                                                                                                                                                                                                                                                                                                                                                                                                                                                                                                                                                                                                                                                                                                                                                                                                                                                                                                                                                                                                                                                                                                                                                                                                                                                                                                                                                                                                                                                                                                                                                                                                                                                                                                                                                                                                                                                                                                                                                                                                                                                                                                                                                                                                                                                                                                                                                                                                                                                                                                                                                               |
| YP_615708 | Sala_0654 | pyridoxamine 5'-phosphate oxidase              | 47.69%            | 8                       |                                                                                                                                                                                                                                                                                                                                                                                                                                                                                                                                                                                                                                                                                                                                                                                                                                                                                                                                                                                                                                                                                                                                                                                                                                                                                                                                                                                                                                                                                                                                                                                                                                                                                                                                                                                                                                                                                                                                                                                                                                                                                                                                                                                                                                                                                                                                                                                                                                                                                                                                                                                                                                                                                                                                                                                                                                                                                                                                                                                                                                                                                                                                                                                                                                                                                                                                                                                               |
| YP_615709 | Sala_0655 | chaperone DnaJ-like protein                    | 63.61%            | 15                      |                                                                                                                                                                                                                                                                                                                                                                                                                                                                                                                                                                                                                                                                                                                                                                                                                                                                                                                                                                                                                                                                                                                                                                                                                                                                                                                                                                                                                                                                                                                                                                                                                                                                                                                                                                                                                                                                                                                                                                                                                                                                                                                                                                                                                                                                                                                                                                                                                                                                                                                                                                                                                                                                                                                                                                                                                                                                                                                                                                                                                                                                                                                                                                                                                                                                                                                                                                                               |
| YP_615711 | Sala_0657 | enoyl-acyl-carrier-protein reductase           | 73.45%            | 12                      |                                                                                                                                                                                                                                                                                                                                                                                                                                                                                                                                                                                                                                                                                                                                                                                                                                                                                                                                                                                                                                                                                                                                                                                                                                                                                                                                                                                                                                                                                                                                                                                                                                                                                                                                                                                                                                                                                                                                                                                                                                                                                                                                                                                                                                                                                                                                                                                                                                                                                                                                                                                                                                                                                                                                                                                                                                                                                                                                                                                                                                                                                                                                                                                                                                                                                                                                                                                               |
| YP_615713 | Sala_0659 | Chorismate synthase                            | 32.12%            | 9                       |                                                                                                                                                                                                                                                                                                                                                                                                                                                                                                                                                                                                                                                                                                                                                                                                                                                                                                                                                                                                                                                                                                                                                                                                                                                                                                                                                                                                                                                                                                                                                                                                                                                                                                                                                                                                                                                                                                                                                                                                                                                                                                                                                                                                                                                                                                                                                                                                                                                                                                                                                                                                                                                                                                                                                                                                                                                                                                                                                                                                                                                                                                                                                                                                                                                                                                                                                                                               |

| Accession | Locus tag | Description                            | Sequence coverage | No. peptides identified | List of peptides identified                                                                                                                                                                                                                                                                                                                                                                                                                                                                                                                                                                                                                                                                                                                                                                                                                                                                                                                                                                                                                                                                                                                                                                                                                                                                                                                                                                                                                                                                                                                                                                                                                                                                                                                                                                                                                                                                                                                                                                                                                                                                                                                                                                                                                                                                                                                                                                                                                                                                                                                                                                                                                                                                                                                                                                                                                                                                                                                                                                                                                                                                                                                                                                                                                                                                      |
|-----------|-----------|----------------------------------------|-------------------|-------------------------|--------------------------------------------------------------------------------------------------------------------------------------------------------------------------------------------------------------------------------------------------------------------------------------------------------------------------------------------------------------------------------------------------------------------------------------------------------------------------------------------------------------------------------------------------------------------------------------------------------------------------------------------------------------------------------------------------------------------------------------------------------------------------------------------------------------------------------------------------------------------------------------------------------------------------------------------------------------------------------------------------------------------------------------------------------------------------------------------------------------------------------------------------------------------------------------------------------------------------------------------------------------------------------------------------------------------------------------------------------------------------------------------------------------------------------------------------------------------------------------------------------------------------------------------------------------------------------------------------------------------------------------------------------------------------------------------------------------------------------------------------------------------------------------------------------------------------------------------------------------------------------------------------------------------------------------------------------------------------------------------------------------------------------------------------------------------------------------------------------------------------------------------------------------------------------------------------------------------------------------------------------------------------------------------------------------------------------------------------------------------------------------------------------------------------------------------------------------------------------------------------------------------------------------------------------------------------------------------------------------------------------------------------------------------------------------------------------------------------------------------------------------------------------------------------------------------------------------------------------------------------------------------------------------------------------------------------------------------------------------------------------------------------------------------------------------------------------------------------------------------------------------------------------------------------------------------------------------------------------------------------------------------------------------------------|
| YP_615715 | Sala_0661 | sodium:dicarboxylate symporter         | 8.62%             | 2                       | R.AGSIQTSR.E<br>R.TLNVIGDLVAATVVSAGIDDRREGDSPG.                                                                                                                                                                                                                                                                                                                                                                                                                                                                                                                                                                                                                                                                                                                                                                                                                                                                                                                                                                                                                                                                                                                                                                                                                                                                                                                                                                                                                                                                                                                                                                                                                                                                                                                                                                                                                                                                                                                                                                                                                                                                                                                                                                                                                                                                                                                                                                                                                                                                                                                                                                                                                                                                                                                                                                                                                                                                                                                                                                                                                                                                                                                                                                                                                                                  |
| YP_615717 | Sala_0663 | cytochrome P450                        | 18.76%            | 5                       | R.HYADALNDGIR.G<br>R.NPDSADHHPGEGDLPIGNTLEQLR.D<br>R.LREEMLAAPAGEGVGHNSLGELELWFAK.E<br>R.AFLVDYFSR.M<br>K.IFFHHVTTTR.I<br>R.VADAETAPEKLER.K<br>R.PAADVPAVGGDLYEAVIAALK.D<br>R.DYLEGFLAAR.P<br>R.IEEVAHVEAPPK.A<br>R.ASFGLYSNDDVAALIDGLAR.V<br>R.GATEAINLVAYSHPK.K<br>R.SADMTLAYEAAR.R<br>R.GHNMVFAHVSNNVLSPLDVAR.A<br>K.VGAEILIDGQAVPR.L<br>K.LYPTGIGVLWSDKLDALPPWQGGSMIDR.V<br>K.DDQJAFVR.G<br>R.NSITLYPENSAGIVSFSMAGVHPHDIGTILDESQVAIR.A<br>R.LPVDVAALGCDYVYVFSGHK.L<br>R.IAIFGAK.D<br>R.DYATVHR.G<br>R.DQFRLTPGWHYLDTAATAQPKQAVIDATLAAMGR.D<br>R.DAQQTDSQDVK.A<br>R.SVLGGTATGYLKG.V<br>R.AIVQDSGAIHQIEMSIGK.D<br>R.SATANAKPELEIFADVK.C<br>K.DATAALHLNIGGAYGR.I<br>R.YADIDAVAAAWPLPAPESILVPAAGGFAR.A<br>K.LLLQAFVAGVDFGAVDEAR.L<br>R.LQELALAK.L<br>R.LLDVYQPDFVHVLADGR.I<br>R.LAILEDTSGLDIDALR.T<br>K.IENLHATVADKPKL.G<br>K.AVLLTHYQR.L<br>R.AAAGFLGFQYVEIPGVSNVQFLR.E<br>K.RPVNVGFSGGEK.K<br>R.GLEPLSGGFELK.L<br>R.TVGDGINTIMR.R<br>R.NEWMQGLDPR.L<br>K.STLSVVLGGRPYEVEGVTVEGQDLLDMEPHER.A<br>R.GQQADGTAVDR.I<br>R.ASELGLAIAINATR.A<br>K.GVGTALFAATR.A<br>R.EDGYPADWGDIGTFTTR.I<br>R.DKALAEQGYR.T<br>R.QADGPHRNPSPGEGGLKR.V<br>R.GWGLSALDIAELQSR.A<br>R.INAENTQOFER.T<br>R.IKDQAAHAAAR.V<br>R.NPTATVEHEATTSK.I<br>K.VSWTQVETSATWV.Y<br>R.VADYEHGWSADIETDFAPK.G<br>K.LSSLEVDPEILEVYR.K<br>R.NFTQCDLSLLGDR.C<br>R.GLQEEAVALVNGFAK.E<br>K.YSTVQNWYPGNAEGLGGYVFTK.R<br>K.LNVPPIDYQDAYYAAAPK.P<br>K.ISDQQLFANQR.G<br>R.AGVYLSISEAIR.E<br>R.GEGLDAAQLGDAFYDQSHLR.E<br>R.FAGATPGQLSNPTLYQATTR.G<br>K.AAWTESAGPAYAR.L<br>R.FHDVLESQVPLDILR.R<br>R.FGGVTATYEGWGLYSEELAK.D<br>R.ASPDPAUSAEELSEELFNAAAAR.A<br>R.GLPLLDALSAQSAER.A<br>K.DNTPNPQGDIEK.A<br>R.YIYVPGQATAYLIGK.L<br>R.VANVAEAEAYVSR.I<br>R.EAYLADVQYVK.A<br>K.APLVWPKYFAER.E<br>R.WDDVSEAAVAR.H<br>R.LPAFFNTLPK.A<br>R.DADYGRWDDVSEAAVAR.H<br>K.GSLQEFFVHLR.T<br>K.DMGFYTDYPSDFGR.L<br>K.AYFALLANYTTTDMTASQIHGELGLAEVAR.I<br>R.LVVDGTGHDKR.W<br>K.TELEALAYHEGVPGHHLQR.A<br>R.HKLQASAAAMR.A<br>K.AFYQSPSPDGSRGTYVNYDLNDMSK.T<br>R.QQAVAPTADGIWR.L<br>K.LLQASAAAMR.A<br>R.TSPQFYHTTR.E<br>R.NHDYIFDQMGAQSQLPAFLINIHR.V<br>R.EQAIQYK.D<br>K.VAPDLEPADIDIVAVALDR.G<br>R.GALELLDGVAAQPAAGAAKPVFLK.V<br>R.LPLAAGGJASAEQAWER.I<br>R.HGLVPLPLNIGANK.D<br>R.GLAAVIVSNTTVARPPLASR.H<br>R.VSDAVGAGA.<br>R.ARHALTSPMLATELAGR.F<br>K.EAIALNLFGR.Q<br>R.NPAPTLIQDLASVYR.A<br>K.TLIGVLDWGLDAK.E<br>R.AIHVDGKPAVQTR.L<br>R.QGVLIEDSEAGQIAAK.M<br>R.LRNPAYAALLR.D<br>K.ALFPQPAIDLAEAGFEVTPALHNWLV.R<br>R.AAYLGDADFVDPVK.G<br>K.VVLAVGSAGGK.R<br>R.GFMDVVPGLSVGVPGNIR.L<br>R.ETAPAAATDPR.F<br>R.FEPVWKDFPAAR.A<br>K.DNPM5WHLLAEAMQLAYADR.A<br>K.VVLAVGSAGGKR.I<br>R.NPAYAALLR.D<br>R.GPGTSVAVDAPPQG.<br>R.FLGPDKPR.G<br>K.RPLSSMSPITVYVDPDGK.V<br>R.LISPYGAAGR.Y<br>R.GAADPRGPTSAVDGAPPQG.<br>K.MQPFYSFTPTDLGSKL<br>K.MQPFYSFTPTDLGSKL<br>R.RLISPYGAAGR.Y<br>R.VGQGDVSVHDWAPLVAGGAWVEEA.A<br>K.LANWMLAQLR.V<br>K.RPHLVGILVDPPEWAAEWAEEGLPK.E<br>K.DLVNKGDNVSPQR.V<br>R.VNGQLSVEK.V<br>R.VLIDDWLTGDIHIDEAGR.I<br>R.MGVLDRPVDILNLR.L<br>K.LVSNIEETRTIMVVVPR.L<br>R.EVAEQVAAALNLR.K<br>R.KDFADAEFTIENEQMTPSMK.I<br>R.DHQHLDNSGAR.A<br>R.AWQALSWR.E<br>R.VEGMLTLQPEILQAMVYGDK.R<br>R.SDAHIVISMESLR.V<br>R.IADDGEICVR.G<br>R.FAIVDPANALAAAR.L<br>R.AAGEATVPTSIGAER.A<br>R.IPVLSDNVWLVHEPASGATMVVDPVAVDVLDAK.A<br>R.LFEGTAEQMFANMQK.L<br>R.GWAITDIWNTHWPHDHTGGNAIK.E |
| YP_615722 | Sala_0668 | protein of unknown function DUF59      | 36.54%            | 4                       |                                                                                                                                                                                                                                                                                                                                                                                                                                                                                                                                                                                                                                                                                                                                                                                                                                                                                                                                                                                                                                                                                                                                                                                                                                                                                                                                                                                                                                                                                                                                                                                                                                                                                                                                                                                                                                                                                                                                                                                                                                                                                                                                                                                                                                                                                                                                                                                                                                                                                                                                                                                                                                                                                                                                                                                                                                                                                                                                                                                                                                                                                                                                                                                                                                                                                                  |
| YP_615723 | Sala_0669 | cysteine desulfurases, SufS subfamily  | 55.80%            | 12                      |                                                                                                                                                                                                                                                                                                                                                                                                                                                                                                                                                                                                                                                                                                                                                                                                                                                                                                                                                                                                                                                                                                                                                                                                                                                                                                                                                                                                                                                                                                                                                                                                                                                                                                                                                                                                                                                                                                                                                                                                                                                                                                                                                                                                                                                                                                                                                                                                                                                                                                                                                                                                                                                                                                                                                                                                                                                                                                                                                                                                                                                                                                                                                                                                                                                                                                  |
| YP_615724 | Sala_0670 | SufB                                   | 55.79%            | 8                       |                                                                                                                                                                                                                                                                                                                                                                                                                                                                                                                                                                                                                                                                                                                                                                                                                                                                                                                                                                                                                                                                                                                                                                                                                                                                                                                                                                                                                                                                                                                                                                                                                                                                                                                                                                                                                                                                                                                                                                                                                                                                                                                                                                                                                                                                                                                                                                                                                                                                                                                                                                                                                                                                                                                                                                                                                                                                                                                                                                                                                                                                                                                                                                                                                                                                                                  |
| YP_615725 | Sala_0671 | FeS assembly ATPase SufC               | 67.21%            | 10                      |                                                                                                                                                                                                                                                                                                                                                                                                                                                                                                                                                                                                                                                                                                                                                                                                                                                                                                                                                                                                                                                                                                                                                                                                                                                                                                                                                                                                                                                                                                                                                                                                                                                                                                                                                                                                                                                                                                                                                                                                                                                                                                                                                                                                                                                                                                                                                                                                                                                                                                                                                                                                                                                                                                                                                                                                                                                                                                                                                                                                                                                                                                                                                                                                                                                                                                  |
| YP_615726 | Sala_0672 | acetyltransferase, GNAT family         | 30.99%            | 4                       |                                                                                                                                                                                                                                                                                                                                                                                                                                                                                                                                                                                                                                                                                                                                                                                                                                                                                                                                                                                                                                                                                                                                                                                                                                                                                                                                                                                                                                                                                                                                                                                                                                                                                                                                                                                                                                                                                                                                                                                                                                                                                                                                                                                                                                                                                                                                                                                                                                                                                                                                                                                                                                                                                                                                                                                                                                                                                                                                                                                                                                                                                                                                                                                                                                                                                                  |
| YP_615727 | Sala_0673 | protein of unknown function DUF559     | 24.86%            | 3                       |                                                                                                                                                                                                                                                                                                                                                                                                                                                                                                                                                                                                                                                                                                                                                                                                                                                                                                                                                                                                                                                                                                                                                                                                                                                                                                                                                                                                                                                                                                                                                                                                                                                                                                                                                                                                                                                                                                                                                                                                                                                                                                                                                                                                                                                                                                                                                                                                                                                                                                                                                                                                                                                                                                                                                                                                                                                                                                                                                                                                                                                                                                                                                                                                                                                                                                  |
| YP_615728 | Sala_0674 | FeS assembly protein SufB              | 37.17%            | 12                      |                                                                                                                                                                                                                                                                                                                                                                                                                                                                                                                                                                                                                                                                                                                                                                                                                                                                                                                                                                                                                                                                                                                                                                                                                                                                                                                                                                                                                                                                                                                                                                                                                                                                                                                                                                                                                                                                                                                                                                                                                                                                                                                                                                                                                                                                                                                                                                                                                                                                                                                                                                                                                                                                                                                                                                                                                                                                                                                                                                                                                                                                                                                                                                                                                                                                                                  |
| YP_615732 | Sala_0678 | transcriptional regulator, AraC family | 14.24%            | 2                       |                                                                                                                                                                                                                                                                                                                                                                                                                                                                                                                                                                                                                                                                                                                                                                                                                                                                                                                                                                                                                                                                                                                                                                                                                                                                                                                                                                                                                                                                                                                                                                                                                                                                                                                                                                                                                                                                                                                                                                                                                                                                                                                                                                                                                                                                                                                                                                                                                                                                                                                                                                                                                                                                                                                                                                                                                                                                                                                                                                                                                                                                                                                                                                                                                                                                                                  |
| YP_615733 | Sala_0679 | protein of unknown function DUF885     | 60.33%            | 25                      |                                                                                                                                                                                                                                                                                                                                                                                                                                                                                                                                                                                                                                                                                                                                                                                                                                                                                                                                                                                                                                                                                                                                                                                                                                                                                                                                                                                                                                                                                                                                                                                                                                                                                                                                                                                                                                                                                                                                                                                                                                                                                                                                                                                                                                                                                                                                                                                                                                                                                                                                                                                                                                                                                                                                                                                                                                                                                                                                                                                                                                                                                                                                                                                                                                                                                                  |
| YP_615734 | Sala_0680 | dihydroorotate dehydrogenase           | 35.11%            | 7                       |                                                                                                                                                                                                                                                                                                                                                                                                                                                                                                                                                                                                                                                                                                                                                                                                                                                                                                                                                                                                                                                                                                                                                                                                                                                                                                                                                                                                                                                                                                                                                                                                                                                                                                                                                                                                                                                                                                                                                                                                                                                                                                                                                                                                                                                                                                                                                                                                                                                                                                                                                                                                                                                                                                                                                                                                                                                                                                                                                                                                                                                                                                                                                                                                                                                                                                  |
| YP_615735 | Sala_0681 | Gamma-glutamyltransferase              | 46.96%            | 23                      |                                                                                                                                                                                                                                                                                                                                                                                                                                                                                                                                                                                                                                                                                                                                                                                                                                                                                                                                                                                                                                                                                                                                                                                                                                                                                                                                                                                                                                                                                                                                                                                                                                                                                                                                                                                                                                                                                                                                                                                                                                                                                                                                                                                                                                                                                                                                                                                                                                                                                                                                                                                                                                                                                                                                                                                                                                                                                                                                                                                                                                                                                                                                                                                                                                                                                                  |
| YP_615736 | Sala_0682 | AMP-dependent synthetase and ligase    | 39.77%            | 15                      |                                                                                                                                                                                                                                                                                                                                                                                                                                                                                                                                                                                                                                                                                                                                                                                                                                                                                                                                                                                                                                                                                                                                                                                                                                                                                                                                                                                                                                                                                                                                                                                                                                                                                                                                                                                                                                                                                                                                                                                                                                                                                                                                                                                                                                                                                                                                                                                                                                                                                                                                                                                                                                                                                                                                                                                                                                                                                                                                                                                                                                                                                                                                                                                                                                                                                                  |
| YP_615738 | Sala_0684 | Hydroxyacylglutathione hydrolase       | 49.59%            | 8                       |                                                                                                                                                                                                                                                                                                                                                                                                                                                                                                                                                                                                                                                                                                                                                                                                                                                                                                                                                                                                                                                                                                                                                                                                                                                                                                                                                                                                                                                                                                                                                                                                                                                                                                                                                                                                                                                                                                                                                                                                                                                                                                                                                                                                                                                                                                                                                                                                                                                                                                                                                                                                                                                                                                                                                                                                                                                                                                                                                                                                                                                                                                                                                                                                                                                                                                  |





| Accession | Locus tag | Description                                  | Sequence coverage | No. peptides identified | List of peptides identified                                                                                                                                                                                                                                                                                                                                                                                                                                                                                                                                                                                                                                                                                                                                                                                                                                                                                                                                                                                                                                                                                                                                                                                                                                                                                                                                                                                                                                                                                                                                                                                                                                                                                                                                                                                                                                                                                                                                                                                                                                                                                                                                                                                                                                                                                                                                                                                                                                                                                                                                                                                                                                                                                                                                                                                                                                                                                                                                                                                                                                                                            |
|-----------|-----------|----------------------------------------------|-------------------|-------------------------|--------------------------------------------------------------------------------------------------------------------------------------------------------------------------------------------------------------------------------------------------------------------------------------------------------------------------------------------------------------------------------------------------------------------------------------------------------------------------------------------------------------------------------------------------------------------------------------------------------------------------------------------------------------------------------------------------------------------------------------------------------------------------------------------------------------------------------------------------------------------------------------------------------------------------------------------------------------------------------------------------------------------------------------------------------------------------------------------------------------------------------------------------------------------------------------------------------------------------------------------------------------------------------------------------------------------------------------------------------------------------------------------------------------------------------------------------------------------------------------------------------------------------------------------------------------------------------------------------------------------------------------------------------------------------------------------------------------------------------------------------------------------------------------------------------------------------------------------------------------------------------------------------------------------------------------------------------------------------------------------------------------------------------------------------------------------------------------------------------------------------------------------------------------------------------------------------------------------------------------------------------------------------------------------------------------------------------------------------------------------------------------------------------------------------------------------------------------------------------------------------------------------------------------------------------------------------------------------------------------------------------------------------------------------------------------------------------------------------------------------------------------------------------------------------------------------------------------------------------------------------------------------------------------------------------------------------------------------------------------------------------------------------------------------------------------------------------------------------------|
| YP_615772 | Sala_0718 | hypothetical protein                         | 15.16%            | 4                       | R.LTAEALPLLR.N<br>R.GAITDLIAMDIDAIDEMQK.T<br>K.TAGAVDLYDYTEFEMR.D<br>R.MEGHADEIHASGLR.L<br>R.EIIEHEDADAITR.E<br>R.FEVPVAGAQANLPEVPDEVKEER.Y<br>R.RIDAVLR.E<br>R.TLPIVIIDEVGEADEDGSSIGATGR.S<br>R.SQADAPAEIDGHVYLR.D<br>R.ERPVAEEVGR.S<br>R.LTNHIVLVGVSGAEAVHELIQR.G<br>R.QAGANNVINPVSTGLLLAGSAQGAHVAEYMADEASIGGR.V<br>R.VAEAQSVLSAGR.D<br>R.SLDQLASGGGR.G                                                                                                                                                                                                                                                                                                                                                                                                                                                                                                                                                                                                                                                                                                                                                                                                                                                                                                                                                                                                                                                                                                                                                                                                                                                                                                                                                                                                                                                                                                                                                                                                                                                                                                                                                                                                                                                                                                                                                                                                                                                                                                                                                                                                                                                                                                                                                                                                                                                                                                                                                                                                                                                                                                                                              |
| YP_615774 | Sala_0720 | TrkA-N                                       | 27.61%            | 5                       | R.TLNNINFPFAIAAEVQGR.V<br>R.GANLGGDITTSSTVSAAIEGALAGIR.S<br>R.ILLTNDGYPHAPGMVLEAJAR.Q<br>R.SJALSQVYR.E<br>R.EGMGDSVFEAAEQWGAR.V<br>R.GSIVEGTDPR.G<br>R.FISVTPQLDLTHDPSLAALR.A<br>K.LMPEKPDLLSGVNR.G<br>R.VLAPLMTDMAPR.T<br>R.GYPYVWFLHGIEHSGHSDLEAIDDR.F<br>K.LMPEKPDLLSGVNR.G<br>R.SFDFTPLEHADFAPALGLDFETAAK.M<br>R.RGLAPLSAEILAADAELR.A<br>R.GLAPLSAEILAADAELR.A<br>R.AAESLLELELYPK.M<br>R.LAALPNLPADDVPDEGEAAGNVLSR.W<br>K.VELVITRPEDSDAELER.K<br>R.EQILAEADLPIR.M<br>R.AQLAALHDR.L<br>R.ALQTDIQAALR.R<br>R.DDAFGTTQPK.F<br>K.FREDLQTTDGLWLISTSEMSTNAVR.E<br>R.KTYDLEVWLPQNAYR.E<br>R.DNPHAFDAGLAR.R<br>R.ALGFMLDR.Q<br>K.TYDLEVWLPQNAYR.E<br>R.TVAILEWQQAQGSVDIPAALLPYMGGTR.L<br>R.EIISCSNCGDFQAR.R<br>R.EGGKNEFVHTLNSGLAVGR.T<br>K.LIGQAMAAGDKKAEALKEVAALK.A<br>K.LIGQAMAAGDKKAEALKEAL.A<br>K.AALPAEEAER.A<br>K.SILSEASTLAHLQDGPLREPLADR.A<br>K.IADVGDALR.E<br>R.ASSETDWAIER.L<br>R.ASSETDWAIER.L<br>K.SNLDSDYVPSDDEEFMNER.Q<br>R.PIATMTLEAQR.H<br>R.LQARPIATMTLEAQR.H<br>R.RIDEGEYCAVTEGIFSLAR.L<br>K.SILSEASTLAHLQDGLR.E<br>R.AHFTDNRDSDHDLVADVAASVGLDR.A<br>R.LLTWAGASEVPQAAPTQVQALK.L<br>R.TEESWWADR.N<br>R.DVSDHDLVADVAASVGLDR.A<br>R.APEQTAARLAALK.V<br>R.TGSTARLIVEHAR.L<br>R.I.LGDKLIEDFEAR.E<br>R.GYAATGLNLDVLAGSPK.G<br>R.SVALQDFPAGGISAIDVFK.T<br>R.DTNTYQFVGGGR.W<br>R.TSGSGNPLFLPDSNDYDASLEYFYSR.T<br>K.TSSAEVLEFSGIAQVNR.S<br>R.AVLPNVPLLVGGVTADDFGR.W<br>R.AGDTVQVHQR.A<br>R.IIIEPNSDPPFESIR.R<br>K.SVGGQGLVAGTVLVDVQVAR.V<br>R.EAIEPAALASSAHSPEGLAAIEAGYAR.M<br>R.NLTYGMLDLSK.A<br>K.AIVTQYDRVDFTEALAK.Q<br>K.AIVTQYDDR.V<br>K.GTTIQSTRWNLDFIDVLR.W<br>R.QFSELREIAEPAAAASSAHSPEGLAAIEAGYAR.M<br>R.DLIEAELAGQANAGLFTVRPGVR.G<br>K.FVFTPVGNPEADLTDNR.F<br>R.WNEAEGVTR.L<br>R.VTNGPFSVDGR.T<br>R.ASGGYFAGYNGLLAIDAK.F<br>K.LLAEIPVPVARPTSVAFGAQLDQIFISTASR.D<br>R.GVALVQYALPHMTVRENMAFGLR.N<br>K.VPANEITDRIETVAATLEIDR.L<br>K.LFLLEPLSNLDAALR.L<br>R.EGQTPFELLEDEALR.L<br>R.GGDLTPFFGSALK.E<br>R.IAVAGLDDPR.L<br>K.DAVEGVYVTQR.N<br>R.LEAEVYKCAK.L<br>R.WIASDDPAALK.A<br>R.VGDTLSER.S<br>R.SDIMITGLNFAPELIR.R<br>R.TLTAADSAMVIDAAK.G<br>R.SVPIITFINKVDR.E<br>K.IEASPWETAR.W<br>R.TFAISHDQDKT<br>R.SVPIITFINK.V<br>K.EFGVTDLLAGLASHAPGQPQPAEPAPVRPDDDAVTFVFK.V<br>K.VQANMNPARR.D<br>R.PMLFLAQDR.E<br>R.GAGADRDPGAPVFMK.D<br>R.VGAPFDEIQVADR.L<br>R.WGSVYYGPTGNLGPAAELQAITQTR.A<br>R.TAYGSISSAVALAGAMALHPTAFLR.Y<br>K.SDVGEYLTVWR.F<br>R.AGQPIILSGSQAIAYV.<br>R.ASVQGRDPGPGYSTSK.M<br>K.GAGGVWTPGALLGQALIDR.L<br>R.DLVGAPADTPLVADASDR.A<br>R.KMAGGASGGTASLLETAL.A<br>K.IFTNVDSIVDPK.D<br>K.IFTNVDSIVDPKDFDPK.N<br>R.TQGMIEPFVEAQR.R<br>R.DGICISVGLSSYGDAR.V<br>R.LSGADGTGVWNVLR.A<br>K.QSLIAPGFPAEADYR.V<br>R.VAIFDLEENRFVQR.G<br>R.VAIFDLEENR.F<br>R.AAQLTQTLPLIYDDTGLTIAGLR.T<br>K.TSLATINAIYNAER.W<br>R.TLVENALDTSERVPQAIEEAETALYR.V<br>R.VLAEQSGVSGEALR.M<br>K.SFSQASLTAAEA.A<br>K.AVGGVGLAQLTSGGALIGAR.D<br>R.IFQQTMAELIR.N<br>R.SGDNVQIEISLR.G<br>R.WFGLAEVNAK.S<br>R.HGIGFIIVLYQLLQGSRR.S<br>R.ALNSGGHLSGITTGIASMANAK.I<br>K.ISKEQFQLSR.A<br>K.ELNVPVMALSQLSR.Q<br>R.VVEDLPVQLTDFHFFELHGR.I<br>R.VQIEISEIR.G<br>R.VDPAQIEEAETALYR.V<br>R.ESGIEQDADMVLFVFR.E<br>K.ALTDFDTSITGR.K |
| YP_615775 | Sala_0721 | stationary-phase survival protein SurE       | 66.67%            | 11                      | R.LTAEALPLLR.N<br>R.GAITDLIAMDIDAIDEMQK.T<br>K.TAGAVDLYDYTEFEMR.D<br>R.MEGHADEIHASGLR.L<br>R.EIIEHEDADAITR.E<br>R.FEVPVAGAQANLPEVPDEVKEER.Y<br>R.RIDAVLR.E<br>R.TLPIVIIDEVGEADEDGSSIGATGR.S<br>R.SQADAPAEIDGHVYLR.D<br>R.ERPVAEEVGR.S<br>R.LTNHIVLVGVSGAEAVHELIQR.G<br>R.QAGANNVINPVSTGLLLAGSAQGAHVAEYMADEASIGGR.V<br>R.VAEAQSVLSAGR.D<br>R.SLDQLASGGGR.G                                                                                                                                                                                                                                                                                                                                                                                                                                                                                                                                                                                                                                                                                                                                                                                                                                                                                                                                                                                                                                                                                                                                                                                                                                                                                                                                                                                                                                                                                                                                                                                                                                                                                                                                                                                                                                                                                                                                                                                                                                                                                                                                                                                                                                                                                                                                                                                                                                                                                                                                                                                                                                                                                                                                              |
| YP_615776 | Sala_0722 | seryl-tRNA synthetase                        | 73.47%            | 21                      | R.LTAEALPLLR.N<br>R.GAITDLIAMDIDAIDEMQK.T<br>K.TAGAVDLYDYTEFEMR.D<br>R.MEGHADEIHASGLR.L<br>R.EIIEHEDADAITR.E<br>R.FEVPVAGAQANLPEVPDEVKEER.Y<br>R.RIDAVLR.E<br>R.TLPIVIIDEVGEADEDGSSIGATGR.S<br>R.SQADAPAEIDGHVYLR.D<br>R.ERPVAEEVGR.S<br>R.LTNHIVLVGVSGAEAVHELIQR.G<br>R.QAGANNVINPVSTGLLLAGSAQGAHVAEYMADEASIGGR.V<br>R.VAEAQSVLSAGR.D<br>R.SLDQLASGGGR.G                                                                                                                                                                                                                                                                                                                                                                                                                                                                                                                                                                                                                                                                                                                                                                                                                                                                                                                                                                                                                                                                                                                                                                                                                                                                                                                                                                                                                                                                                                                                                                                                                                                                                                                                                                                                                                                                                                                                                                                                                                                                                                                                                                                                                                                                                                                                                                                                                                                                                                                                                                                                                                                                                                                                              |
| YP_615778 | Sala_0724 | transcriptional regulators, TraR/DksA family | 67.97%            | 8                       | R.LTAEALPLLR.N<br>R.GAITDLIAMDIDAIDEMQK.T<br>K.TAGAVDLYDYTEFEMR.D<br>R.MEGHADEIHASGLR.L<br>R.EIIEHEDADAITR.E<br>R.FEVPVAGAQANLPEVPDEVKEER.Y<br>R.RIDAVLR.E<br>R.TLPIVIIDEVGEADEDGSSIGATGR.S<br>R.SQADAPAEIDGHVYLR.D<br>R.ERPVAEEVGR.S<br>R.LTNHIVLVGVSGAEAVHELIQR.G<br>R.QAGANNVINPVSTGLLLAGSAQGAHVAEYMADEASIGGR.V<br>R.VAEAQSVLSAGR.D<br>R.SLDQLASGGGR.G                                                                                                                                                                                                                                                                                                                                                                                                                                                                                                                                                                                                                                                                                                                                                                                                                                                                                                                                                                                                                                                                                                                                                                                                                                                                                                                                                                                                                                                                                                                                                                                                                                                                                                                                                                                                                                                                                                                                                                                                                                                                                                                                                                                                                                                                                                                                                                                                                                                                                                                                                                                                                                                                                                                                              |
| YP_615782 | Sala_0728 | DSBA oxidoreductase                          | 25.65%            | 4                       | R.LTAEALPLLR.N<br>R.GAITDLIAMDIDAIDEMQK.T<br>K.TAGAVDLYDYTEFEMR.D<br>R.MEGHADEIHASGLR.L<br>R.EIIEHEDADAITR.E<br>R.FEVPVAGAQANLPEVPDEVKEER.Y<br>R.RIDAVLR.E<br>R.TLPIVIIDEVGEADEDGSSIGATGR.S<br>R.SQADAPAEIDGHVYLR.D<br>R.ERPVAEEVGR.S<br>R.LTNHIVLVGVSGAEAVHELIQR.G<br>R.QAGANNVINPVSTGLLLAGSAQGAHVAEYMADEASIGGR.V<br>R.VAEAQSVLSAGR.D<br>R.SLDQLASGGGR.G                                                                                                                                                                                                                                                                                                                                                                                                                                                                                                                                                                                                                                                                                                                                                                                                                                                                                                                                                                                                                                                                                                                                                                                                                                                                                                                                                                                                                                                                                                                                                                                                                                                                                                                                                                                                                                                                                                                                                                                                                                                                                                                                                                                                                                                                                                                                                                                                                                                                                                                                                                                                                                                                                                                                              |
| YP_615788 | Sala_0735 | transcriptional regulator, TetR family       | 28.30%            | 4                       | R.LTAEALPLLR.N<br>R.GAITDLIAMDIDAIDEMQK.T<br>K.TAGAVDLYDYTEFEMR.D<br>R.MEGHADEIHASGLR.L<br>R.EIIEHEDADAITR.E<br>R.FEVPVAGAQANLPEVPDEVKEER.Y<br>R.RIDAVLR.E<br>R.TLPIVIIDEVGEADEDGSSIGATGR.S<br>R.SQADAPAEIDGHVYLR.D<br>R.ERPVAEEVGR.S<br>R.LTNHIVLVGVSGAEAVHELIQR.G<br>R.QAGANNVINPVSTGLLLAGSAQGAHVAEYMADEASIGGR.V<br>R.VAEAQSVLSAGR.D<br>R.SLDQLASGGGR.G                                                                                                                                                                                                                                                                                                                                                                                                                                                                                                                                                                                                                                                                                                                                                                                                                                                                                                                                                                                                                                                                                                                                                                                                                                                                                                                                                                                                                                                                                                                                                                                                                                                                                                                                                                                                                                                                                                                                                                                                                                                                                                                                                                                                                                                                                                                                                                                                                                                                                                                                                                                                                                                                                                                                              |
| YP_615794 | Sala_0741 | TonB-dependent receptor                      | 8.28%             | 4                       | R.LTAEALPLLR.N<br>R.GAITDLIAMDIDAIDEMQK.T<br>K.TAGAVDLYDYTEFEMR.D<br>R.MEGHADEIHASGLR.L<br>R.EIIEHEDADAITR.E<br>R.FEVPVAGAQANLPEVPDEVKEER.Y<br>R.RIDAVLR.E<br>R.TLPIVIIDEVGEADEDGSSIGATGR.S<br>R.SQADAPAEIDGHVYLR.D<br>R.ERPVAEEVGR.S<br>R.LTNHIVLVGVSGAEAVHELIQR.G<br>R.QAGANNVINPVSTGLLLAGSAQGAHVAEYMADEASIGGR.V<br>R.VAEAQSVLSAGR.D<br>R.SLDQLASGGGR.G                                                                                                                                                                                                                                                                                                                                                                                                                                                                                                                                                                                                                                                                                                                                                                                                                                                                                                                                                                                                                                                                                                                                                                                                                                                                                                                                                                                                                                                                                                                                                                                                                                                                                                                                                                                                                                                                                                                                                                                                                                                                                                                                                                                                                                                                                                                                                                                                                                                                                                                                                                                                                                                                                                                                              |
| YP_615797 | Sala_0744 | KDPG and KHG aldolase                        | 32.71%            | 4                       | R.LTAEALPLLR.N<br>R.GAITDLIAMDIDAIDEMQK.T<br>K.TAGAVDLYDYTEFEMR.D<br>R.MEGHADEIHASGLR.L<br>R.EIIEHEDADAITR.E<br>R.FEVPVAGAQANLPEVPDEVKEER.Y<br>R.RIDAVLR.E<br>R.TLPIVIIDEVGEADEDGSSIGATGR.S<br>R.SQADAPAEIDGHVYLR.D<br>R.ERPVAEEVGR.S<br>R.LTNHIVLVGVSGAEAVHELIQR.G<br>R.QAGANNVINPVSTGLLLAGSAQGAHVAEYMADEASIGGR.V<br>R.VAEAQSVLSAGR.D<br>R.SLDQLASGGGR.G                                                                                                                                                                                                                                                                                                                                                                                                                                                                                                                                                                                                                                                                                                                                                                                                                                                                                                                                                                                                                                                                                                                                                                                                                                                                                                                                                                                                                                                                                                                                                                                                                                                                                                                                                                                                                                                                                                                                                                                                                                                                                                                                                                                                                                                                                                                                                                                                                                                                                                                                                                                                                                                                                                                                              |
| YP_615799 | Sala_0746 | GntR-like protein                            | 35.68%            | 6                       | R.LTAEALPLLR.N<br>R.GAITDLIAMDIDAIDEMQK.T<br>K.TAGAVDLYDYTEFEMR.D<br>R.MEGHADEIHASGLR.L<br>R.EIIEHEDADAITR.E<br>R.FEVPVAGAQANLPEVPDEVKEER.Y<br>R.RIDAVLR.E<br>R.TLPIVIIDEVGEADEDGSSIGATGR.S<br>R.SQADAPAEIDGHVYLR.D<br>R.ERPVAEEVGR.S<br>R.LTNHIVLVGVSGAEAVHELIQR.G<br>R.QAGANNVINPVSTGLLLAGSAQGAHVAEYMADEASIGGR.V<br>R.VAEAQSVLSAGR.D<br>R.SLDQLASGGGR.G                                                                                                                                                                                                                                                                                                                                                                                                                                                                                                                                                                                                                                                                                                                                                                                                                                                                                                                                                                                                                                                                                                                                                                                                                                                                                                                                                                                                                                                                                                                                                                                                                                                                                                                                                                                                                                                                                                                                                                                                                                                                                                                                                                                                                                                                                                                                                                                                                                                                                                                                                                                                                                                                                                                                              |
| YP_615800 | Sala_0747 | Senescence marker protein-30 (SMP-30)        | 39.79%            | 6                       | R.LTAEALPLLR.N<br>R.GAITDLIAMDIDAIDEMQK.T<br>K.TAGAVDLYDYTEFEMR.D<br>R.MEGHADEIHASGLR.L<br>R.EIIEHEDADAITR.E<br>R.FEVPVAGAQANLPEVPDEVKEER.Y<br>R.RIDAVLR.E<br>R.TLPIVIIDEVGEADEDGSSIGATGR.S<br>R.SQADAPAEIDGHVYLR.D<br>R.ERPVAEEVGR.S<br>R.LTNHIVLVGVSGAEAVHELIQR.G<br>R.QAGANNVINPVSTGLLLAGSAQGAHVAEYMADEASIGGR.V<br>R.VAEAQSVLSAGR.D<br>R.SLDQLASGGGR.G                                                                                                                                                                                                                                                                                                                                                                                                                                                                                                                                                                                                                                                                                                                                                                                                                                                                                                                                                                                                                                                                                                                                                                                                                                                                                                                                                                                                                                                                                                                                                                                                                                                                                                                                                                                                                                                                                                                                                                                                                                                                                                                                                                                                                                                                                                                                                                                                                                                                                                                                                                                                                                                                                                                                              |
| YP_615804 | Sala_0751 | ABC transporter related                      | 17.26%            | 3                       | R.LTAEALPLLR.N<br>R.GAITDLIAMDIDAIDEMQK.T<br>K.TAGAVDLYDYTEFEMR.D<br>R.MEGHADEIHASGLR.L<br>R.EIIEHEDADAITR.E<br>R.FEVPVAGAQANLPEVPDEVKEER.Y<br>R.RIDAVLR.E<br>R.TLPIVIIDEVGEADEDGSSIGATGR.S<br>R.SQADAPAEIDGHVYLR.D<br>R.ERPVAEEVGR.S<br>R.LTNHIVLVGVSGAEAVHELIQR.G<br>R.QAGANNVINPVSTGLLLAGSAQGAHVAEYMADEASIGGR.V<br>R.VAEAQSVLSAGR.D<br>R.SLDQLASGGGR.G                                                                                                                                                                                                                                                                                                                                                                                                                                                                                                                                                                                                                                                                                                                                                                                                                                                                                                                                                                                                                                                                                                                                                                                                                                                                                                                                                                                                                                                                                                                                                                                                                                                                                                                                                                                                                                                                                                                                                                                                                                                                                                                                                                                                                                                                                                                                                                                                                                                                                                                                                                                                                                                                                                                                              |
| YP_615807 | Sala_0754 | peptide chain release factor 3               | 40.62%            | 17                      | R.LTAEALPLLR.N<br>R.GAITDLIAMDIDAIDEMQK.T<br>K.TAGAVDLYDYTEFEMR.D<br>R.MEGHADEIHASGLR.L<br>R.EIIEHEDADAITR.E<br>R.FEVPVAGAQANLPEVPDEVKEER.Y<br>R.RIDAVLR.E<br>R.TLPIVIIDEVGEADEDGSSIGATGR.S<br>R.SQADAPAEIDGHVYLR.D<br>R.ERPVAEEVGR.S<br>R.LTNHIVLVGVSGAEAVHELIQR.G<br>R.QAGANNVINPVSTGLLLAGSAQGAHVAEYMADEASIGGR.V<br>R.VAEAQSVLSAGR.D<br>R.SLDQLASGGGR.G                                                                                                                                                                                                                                                                                                                                                                                                                                                                                                                                                                                                                                                                                                                                                                                                                                                                                                                                                                                                                                                                                                                                                                                                                                                                                                                                                                                                                                                                                                                                                                                                                                                                                                                                                                                                                                                                                                                                                                                                                                                                                                                                                                                                                                                                                                                                                                                                                                                                                                                                                                                                                                                                                                                                              |
| YP_615808 | Sala_0755 | hypothetical protein                         | 26.28%            | 2                       | R.LTAEALPLLR.N<br>R.GAITDLIAMDIDAIDEMQK.T<br>K.TAGAVDLYDYTEFEMR.D<br>R.MEGHADEIHASGLR.L<br>R.EIIEHEDADAITR.E<br>R.FEVPVAGAQANLPEVPDEVKEER.Y<br>R.RIDAVLR.E<br>R.TLPIVIIDEVGEADEDGSSIGATGR.S<br>R.SQADAPAEIDGHVYLR.D<br>R.ERPVAEEVGR.S<br>R.LTNHIVLVGVSGAEAVHELIQR.G<br>R.QAGANNVINPVSTGLLLAGSAQGAHVAEYMADEASIGGR.V<br>R.VAEAQSVLSAGR.D<br>R.SLDQLASGGGR.G                                                                                                                                                                                                                                                                                                                                                                                                                                                                                                                                                                                                                                                                                                                                                                                                                                                                                                                                                                                                                                                                                                                                                                                                                                                                                                                                                                                                                                                                                                                                                                                                                                                                                                                                                                                                                                                                                                                                                                                                                                                                                                                                                                                                                                                                                                                                                                                                                                                                                                                                                                                                                                                                                                                                              |
| YP_615813 | Sala_0760 | hypothetical protein                         | 19.92%            | 3                       | R.LTAEALPLLR.N<br>R.GAITDLIAMDIDAIDEMQK.T<br>K.TAGAVDLYDYTEFEMR.D<br>R.MEGHADEIHASGLR.L<br>R.EIIEHEDADAITR.E<br>R.FEVPVAGAQANLPEVPDEVKEER.Y<br>R.RIDAVLR.E<br>R.TLPIVIIDEVGEADEDGSSIGATGR.S<br>R.SQADAPAEIDGHVYLR.D<br>R.ERPVAEEVGR.S<br>R.LTNHIVLVGVSGAEAVHELIQR.G<br>R.QAGANNVINPVSTGLLLAGSAQGAHVAEYMADEASIGGR.V<br>R.VAEAQSVLSAGR.D<br>R.SLDQLASGGGR.G                                                                                                                                                                                                                                                                                                                                                                                                                                                                                                                                                                                                                                                                                                                                                                                                                                                                                                                                                                                                                                                                                                                                                                                                                                                                                                                                                                                                                                                                                                                                                                                                                                                                                                                                                                                                                                                                                                                                                                                                                                                                                                                                                                                                                                                                                                                                                                                                                                                                                                                                                                                                                                                                                                                                              |
| YP_615814 | Sala_0761 | Saccharopine dehydrogenase                   | 18.72%            | 4                       | R.LTAEALPLLR.N<br>R.GAITDLIAMDIDAIDEMQK.T<br>K.TAGAVDLYDYTEFEMR.D<br>R.MEGHADEIHASGLR.L<br>R.EIIEHEDADAITR.E<br>R.FEVPVAGAQANLPEVPDEVKEER.Y<br>R.RIDAVLR.E<br>R.TLPIVIIDEVGEADEDGSSIGATGR.S<br>R.SQADAPAEIDGHVYLR.D<br>R.ERPVAEEVGR.S<br>R.LTNHIVLVGVSGAEAVHELIQR.G<br>R.QAGANNVINPVSTGLLLAGSAQGAHVAEYMADEASIGGR.V<br>R.VAEAQSVLSAGR.D<br>R.SLDQLASGGGR.G                                                                                                                                                                                                                                                                                                                                                                                                                                                                                                                                                                                                                                                                                                                                                                                                                                                                                                                                                                                                                                                                                                                                                                                                                                                                                                                                                                                                                                                                                                                                                                                                                                                                                                                                                                                                                                                                                                                                                                                                                                                                                                                                                                                                                                                                                                                                                                                                                                                                                                                                                                                                                                                                                                                                              |
| YP_615815 | Sala_0762 | Deoxycytidine triphosphate deaminase         | 25.54%            | 4                       | R.LTAEALPLLR.N<br>R.GAITDLIAMDIDAIDEMQK.T<br>K.TAGAVDLYDYTEFEMR.D<br>R.MEGHADEIHASGLR.L<br>R.EIIEHEDADAITR.E<br>R.FEVPVAGAQANLPEVPDEVKEER.Y<br>R.RIDAVLR.E<br>R.TLPIVIIDEVGEADEDGSSIGATGR.S<br>R.SQADAPAEIDGHVYLR.D<br>R.ERPVAEEVGR.S<br>R.LTNHIVLVGVSGAEAVHELIQR.G<br>R.QAGANNVINPVSTGLLLAGSAQGAHVAEYMADEASIGGR.V<br>R.VAEAQSVLSAGR.D<br>R.SLDQLASGGGR.G                                                                                                                                                                                                                                                                                                                                                                                                                                                                                                                                                                                                                                                                                                                                                                                                                                                                                                                                                                                                                                                                                                                                                                                                                                                                                                                                                                                                                                                                                                                                                                                                                                                                                                                                                                                                                                                                                                                                                                                                                                                                                                                                                                                                                                                                                                                                                                                                                                                                                                                                                                                                                                                                                                                                              |
| YP_615817 | Sala_0764 | glycoside hydrolase, family 25               | 11.55%            | 2                       | R.LTAEALPLLR.N<br>R.GAITDLIAMDIDAIDEMQK.T<br>K.TAGAVDLYDYTEFEMR.D<br>R.MEGHADEIHASGLR.L<br>R.EIIEHEDADAITR.E<br>R.FEVPVAGAQANLPEVPDEVKEER.Y<br>R.RIDAVLR.E<br>R.TLPIVIIDEVGEADEDGSSIGATGR.S<br>R.SQADAPAEIDGHVYLR.D<br>R.ERPVAEEVGR.S<br>R.LTNHIVLVGVSGAEAVHELIQR.G<br>R.QAGANNVINPVSTGLLLAGSAQGAHVAEYMADEASIGGR.V<br>R.VAEAQSVLSAGR.D<br>R.SLDQLASGGGR.G                                                                                                                                                                                                                                                                                                                                                                                                                                                                                                                                                                                                                                                                                                                                                                                                                                                                                                                                                                                                                                                                                                                                                                                                                                                                                                                                                                                                                                                                                                                                                                                                                                                                                                                                                                                                                                                                                                                                                                                                                                                                                                                                                                                                                                                                                                                                                                                                                                                                                                                                                                                                                                                                                                                                              |
| YP_615818 | Sala_0765 | Uncharacterized conserved protein UCP032146  | 9.70%             | 2                       | R.LTAEALPLLR.N<br>R.GAITDLIAMDIDAIDEMQK.T<br>K.TAGAVDLYDYTEFEMR.D<br>R.MEGHADEIHASGLR.L<br>R.EIIEHEDADAITR.E<br>R.FEVPVAGAQANLPEVPDEVKEER.Y<br>R.RIDAVLR.E<br>R.TLPIVIIDEVGEADEDGSSIGATGR.S<br>R.SQADAPAEIDGHVYLR.D<br>R.ERPVAEEVGR.S<br>R.LTNHIVLVGVSGAEAVHELIQR.G<br>R.QAGANNVINPVSTGLLLAGSAQGAHVAEYMADEASIGGR.V<br>R.VAEAQSVLSAGR.D<br>R.SLDQLASGGGR.G                                                                                                                                                                                                                                                                                                                                                                                                                                                                                                                                                                                                                                                                                                                                                                                                                                                                                                                                                                                                                                                                                                                                                                                                                                                                                                                                                                                                                                                                                                                                                                                                                                                                                                                                                                                                                                                                                                                                                                                                                                                                                                                                                                                                                                                                                                                                                                                                                                                                                                                                                                                                                                                                                                                                              |
| YP_615819 | Sala_0766 | replicative DNA helicase                     | 50.89%            | 17                      | R.LTAEALPLLR.N<br>R.GAITDLIAMDIDAIDEMQK.T<br>K.TAGAVDLYDYTEFEMR.D<br>R.MEGHADEIHASGLR.L<br>R.EIIEHEDADAITR.E<br>R.FEVPVAGAQANLPEVPDEVKEER.Y<br>R.RIDAVLR.E<br>R.TLPIVIIDEVGEADEDGSSIGATGR.S<br>R.SQADAPAEIDGHVYLR.D<br>R.ERPVAEEVGR.S<br>R.LTNHIVLVGVSGAEAVHELIQR.G<br>R.QAGANNVINPVSTGLLLAGSAQGAHVAEYMADEASIGGR.V<br>R.VAEAQSVLSAGR.D<br>R.SLDQLASGGGR.G                                                                                                                                                                                                                                                                                                                                                                                                                                                                                                                                                                                                                                                                                                                                                                                                                                                                                                                                                                                                                                                                                                                                                                                                                                                                                                                                                                                                                                                                                                                                                                                                                                                                                                                                                                                                                                                                                                                                                                                                                                                                                                                                                                                                                                                                                                                                                                                                                                                                                                                                                                                                                                                                                                                                              |
| YP_615821 | Sala_0768 | phosphoadenosine phosphosulfate reductase    | 29.85%            | 5                       | R.LTAEALPLLR.N<br>R.GAITDLIAMDIDAIDEMQK.T<br>K.TAGAVDLYDYTEFEMR.D<br>R.MEGHADEIHASGLR.L<br>R.EIIEHEDADAITR.E<br>R.FEVPVAGAQANLPEVPDEVKEER.Y<br>R.RIDAVLR.E<br>R.TLPIVIIDEVGEADEDGSSIGATGR.S<br>R.SQADAPAEIDGHVYLR.D<br>R.ERPVAEEVGR.S<br>R.LTNHIVLVGVSGAEAVHELIQR.G<br>R.QAGANNVINPVSTGLLLAGSAQGAHVAEYMADEASIGGR.V<br>R.VAEAQSVLSAGR.D<br>R.SLDQLASGGGR.G                                                                                                                                                                                                                                                                                                                                                                                                                                                                                                                                                                                                                                                                                                                                                                                                                                                                                                                                                                                                                                                                                                                                                                                                                                                                                                                                                                                                                                                                                                                                                                                                                                                                                                                                                                                                                                                                                                                                                                                                                                                                                                                                                                                                                                                                                                                                                                                                                                                                                                                                                                                                                                                                                                                                              |

| Accession | Locus tag | Description                                                                    | Sequence coverage | No. peptides identified | List of peptides identified                                                                                                                                                                                                                                                                                                                                                                                                                                                                                                                                                                                                                                                                                                                                                                                                                                                                                                                                                                                                                                                                                                                                                                                                                                                                                                                                                                                                                                                                                                                                                                                                                                                                                                                                                                                                                                                                                                                                                                                                                                                                                                                                                                                                                                                                                                                                      |
|-----------|-----------|--------------------------------------------------------------------------------|-------------------|-------------------------|------------------------------------------------------------------------------------------------------------------------------------------------------------------------------------------------------------------------------------------------------------------------------------------------------------------------------------------------------------------------------------------------------------------------------------------------------------------------------------------------------------------------------------------------------------------------------------------------------------------------------------------------------------------------------------------------------------------------------------------------------------------------------------------------------------------------------------------------------------------------------------------------------------------------------------------------------------------------------------------------------------------------------------------------------------------------------------------------------------------------------------------------------------------------------------------------------------------------------------------------------------------------------------------------------------------------------------------------------------------------------------------------------------------------------------------------------------------------------------------------------------------------------------------------------------------------------------------------------------------------------------------------------------------------------------------------------------------------------------------------------------------------------------------------------------------------------------------------------------------------------------------------------------------------------------------------------------------------------------------------------------------------------------------------------------------------------------------------------------------------------------------------------------------------------------------------------------------------------------------------------------------------------------------------------------------------------------------------------------------|
| YP_615822 | Sala_0769 | Uncharacterized conserved protein UCPO30820                                    | 51.35%            | 8                       | R.VAPDMPVLFLLDTGK.H<br>R.EMLDAYFAEHLPR.H<br>K.HFFETLALYRDLAAQLGNLNVLTDPDEDELAK.K<br>R.FTQADVIR.L<br>K.LIEIAFPFRR.D<br>R.WPQHQTAAAGVPIWK.L<br>R.AQGDVLDVQIAFMK.C<br>R.AQGDVLDVQIAFMK.R<br>R.LKLIIEAFPFR.D<br>R.CGDSFAFKPLNPADVEAALTR.W<br>R.AQGDVLDVQIAFMK.R<br>R.EAGVYGLER.A<br>R.LAGEITTDQFKPLR.L<br>R.NISSDQWAGAAAEITDPRPWAELLR.Q<br>K.LILHELGADEYRR.Q<br>R.TYDRDVGHFTTR.Q<br>R.QWSSFHPFESYLPR.K<br>R.LHDIGIQUIVER.D<br>R.IAAQFAPPPLDASAPDAIDR.S<br>R.VTHAQNIVLPHVR.K<br>R.KADLYAIWQK.L<br>R.VAIEFSQVRR.R<br>K.LILHELGADEYRR<br>R.KGTENYQLLGGSGAEDVSLATITPGFDEDEGIVDAIER.V<br>R.IAAQFAPPPLDASAPDAIDRSDPFVAVVDQNVAAHK.V<br>R.VTDKYLATR.T<br>R.DGVHGAAFVVGGMGR.T<br>K.VPFGHAIWNISLKVGGIGDASSAQIDLMDLAER.Y<br>K.IAVIAEDER.A<br>K.SLIDPPKAEFDR.I<br>R.QNIIYNIWK.L<br>K.IAVIAEDERAAMR.L<br>K.GTENYQLLGGSGAEDVSLATITPGFDEDEGIVDAIER.V<br>.MYKYDEYDQAMVEAR.V<br>K.LDEAGLAPMLDLSIDIACPLDYSCLANAR.S<br>R.VAVPYGTILDSR.Q<br>R.TPMIAPLIK.D<br>R.SDPFVAVVDQNVAAHK.V<br>R.RQVEEFVAVK.S<br>R.QVEEFAVHK.S<br>K.YDEYDQAMVEAR.V<br>K.LEDAPAILADLASVEMHAIQTSNCIR.N<br>K.LEDAPAILADLASVEMHAIQTSNCIR.N<br>K.ADLYAIWQK.L<br>R.TPMIAPLIKDFVPLDLLSYAEACLR.V<br>R.RLAGEITTDQFKPLR.L<br>R.DGVHGAAFVVGGMGR.T<br>K.DVPLDLLSYAEACLR.V<br>K.ALAHPGIDGLLFTGSAR.T<br>R.TAAILVQSAFLSAGQR.C<br>K.LVELLSAGVPQEVLR.L<br>R.VKAESEAFADLIAR.E<br>R.TEVEAVKVDISVK.A<br>K.DSLADALJAEVRE<br>R.ASIVGGLRDPGSQLVTK.K<br>R.GKVSVDVAEVEIAR.R<br>K.MLALEMGGNNPIVAVDTADIR.T<br>K.AESEAFADLIAR.E<br>R.VTFEAAEAENNTAFGLSAAIIGTQPLYDQFWANAR.A<br>R.LLVGGPDTGK.A<br>R.DPEGSQVTK.K<br>R.ALGAVALLILR.G<br>R.IVGAVALNDVGPQLTAGLDR.I<br>R.TAIDAWMAELPRA.<br>R.IVTYDQKIQAPLR.V<br>R.IVEVPGVGHAPLDPEEAR.T<br>R.VPNGDAGLDLWBPAYR.A<br>R.IRDYVIGAGGSQPTWMHAAR.A<br>R.DFEDLAPHLAQR.R<br>R.AFAELNGAIPYNYGHDWLR.L<br>R.GALSDILAR.S<br>K.TDFPYSNFFPTTK.Q<br>R.HNHVYLISSAR.A<br>R.FSPPTGFYSSAVR.N<br>R.SSGAWAAAGGIGTYSAVNADSYDAEGK.I<br>K.TLQDIAHGGDVEQNLVAFAGHAFNK.T<br>R.AEGISDDVPIVMAGVWYLR.D<br>K.ERHEELJAYADGAVEQVRR.R<br>R.TLDEGDLVLR.F<br>K.TPDNTVFVTEADK.A<br>K.QEAGDHVQLDVGVK.G<br>K.DHDDYTTGYLADPR.S<br>R.DWDDWIDPELQAFQYGRPLTTEESPPIPQAWK.D<br>R.DWYAEGYTEALK.T<br>R.ARDWYAEGYTEALK.T<br>R.AHDIAGGK.G<br>R.AHDIAGGK.G<br>K.VADLMAAVYEDPWLGGHNGLSNAEDPLKPEAPYPR.V<br>K.TPDNTVFVTEADKATR.K<br>R.PLTTEESPPIPQAWK.D<br>R.HEELJAYADGAVEQVRR.A<br>R.HEELJAYADGAVEQVRR.R<br>R.EVWVLVEGGK.G<br>R.DWYAEGYTEALKTPDNTVFVTEADK.A |
| YP_615823 | Sala_0770 | nitrite/sulfite reductase, hemoprotein beta-component, ferredoxin-like protein | 76.80%            | 36                      | K.GLKLKLYGGR.E<br>R.RLPEAEIEELGASVHSDVTLR.I<br>R.IAGAGLDVYTHEPAVDPALLALQNVLLPHLGSATIEGR.E<br>K.ALIAALQTR.I<br>R.LPEAEIEELGASVHSDVTLR.I<br>K.LIANFAGVGDHDLAAAR.A<br>R.IGAMKPTAYLINTAR.G<br>R.GETVDEKALIAALQTR.I<br>R.AFGLSIHYHR.R<br>K.GIMVSNTPGVTEADTMDTALLSVPR.R<br>R.KGPSIDVPLWEYR.R<br>R.KGPSIDVPLWEYR.R<br>R.IITTLIALQR.H<br>R.RGDVVDVTEAPGK.A<br>R.LVAHAHAQEPK.D<br>K.INVHGGATLGHPIGASGT.R<br>R.AMGTFAQDTADAYQLSR.Q<br>R.AGVSGDDIER.I<br>K.DFTVAVPGAINK.L<br>R.QAMDDYTLTSLR.A<br>R.IGHDTAYDHFMLDGLEDAVDAGR.A<br>K.DGTITAATSSSISDGAADVLR.Q<br>K.AAIAEGAFVAEIAPIVTSGR.R<br>R.LVAHAHAQEPKDFTVAVPGAINK.L<br>R.TPMGSMQSLSDASATDLGATAVK.A<br>R.GD VWVDTDEAPGK.A<br>R.AKAAAECAFVAEIAPIVTSGR.R<br>K.IPTLPAFAK.D<br>K.SVQATTVVK.V<br>R.TPMGSMQSLSDASATDLGATAVK.A<br>R.IYMGCVLPAGLGQAPAR.Q<br>R.AMGTFAQDTADAYQLSR.Q<br>R.QSVADAK.G<br>R.IGHDTAYDHFMLDGLEDAVDAGR.A<br>R.EHVIVLSDHSR.L<br>R.QTLAGLAGEDQPKLR.L<br>R.AIGINGTVPGLIR.L<br>R.VLYHDLVALDRNPDVR.A<br>R.HGEPGQGLDVGHR.V<br>R.MDPTDVAOVNGSTYTFVLVNGVYQDNWTFALFRPGR.V<br>R.GFVNGALGGGALAALACYPAWAPVYVAGIAPPLPSVSGTDIRL.I<br>R.AGLFAPVPLR.A<br>K.MSDHHEPIFPLTGER.V                                                                                                                                                                                                                                                                                                                                                                                                                                                                                                                                                                                                                                                                                                                                                                                                                                                                                                                                                                                                                                                                                                                                                                                                                                                 |
| YP_615826 | Sala_0773 | aldehyde dehydrogenase                                                         | 40.12%            | 13                      | R.DGVHGAAFVVGGMGR.T<br>K.DVPLDLLSYAEACLR.V<br>K.ALAHPGIDGLLFTGSAR.T<br>R.TAAILVQSAFLSAGQR.C<br>K.LVELLSAGVPQEVLR.L<br>R.VKAESEAFADLIAR.E<br>R.TEVEAVKVDISVK.A<br>K.DSLADALJAEVRE<br>R.ASIVGGLRDPGSQLVTK.K<br>R.GKVSVDVAEVEIAR.R<br>K.MLALEMGGNNPIVAVDTADIR.T<br>K.AESEAFADLIAR.E<br>R.VTFEAAEAENNTAFGLSAAIIGTQPLYDQFWANAR.A<br>R.LLVGGPDTGK.A<br>R.DPEGSQVTK.K<br>R.ALGAVALLILR.G<br>R.IVGAVALNDVGPQLTAGLDR.I<br>R.TAIDAWMAELPRA.<br>R.IVTYDQKIQAPLR.V<br>R.IVEVPGVGHAPLDPEEAR.T<br>R.VPNGDAGLDLWBPAYR.A<br>R.IRDYVIGAGGSQPTWMHAAR.A<br>R.DFEDLAPHLAQR.R<br>R.AFAELNGAIPYNYGHDWLR.L<br>R.GALSDILAR.S<br>K.TDFPYSNFFPTTK.Q<br>R.HNHVYLISSAR.A<br>R.FSPPTGFYSSAVR.N<br>R.SSGAWAAAGGIGTYSAVNADSYDAEGK.I<br>K.TLQDIAHGGDVEQNLVAFAGHAFNK.T<br>R.AEGISDDVPIVMAGVWYLR.D<br>K.ERHEELJAYADGAVEQVRR.R<br>R.TLDEGDLVLR.F<br>K.TPDNTVFVTEADK.A<br>K.QEAGDHVQLDVGVK.G<br>K.DHDDYTTGYLADPR.S<br>R.DWDDWIDPELQAFQYGRPLTTEESPPIPQAWK.D<br>R.DWYAEGYTEALK.T<br>R.ARDWYAEGYTEALK.T<br>R.AHDIAGGK.G<br>R.AHDIAGGK.G<br>K.VADLMAAVYEDPWLGGHNGLSNAEDPLKPEAPYPR.V<br>K.TPDNTVFVTEADKATR.K<br>R.PLTTEESPPIPQAWK.D<br>R.HEELJAYADGAVEQVRR.A<br>R.HEELJAYADGAVEQVRR.R<br>R.EVWVLVEGGK.G<br>R.DWYAEGYTEALKTPDNTVFVTEADK.A                                                                                                                                                                                                                                                                                                                                                                                                                                                                                                                                                                                                                                                                                                                                                                                                                                                                                                                                                                                                                                                                                                                                                                  |
| YP_615827 | Sala_0774 | alpha/beta hydrolase fold                                                      | 49.84%            | 10                      | R.DGVHGAAFVVGGMGR.T<br>K.DVPLDLLSYAEACLR.V<br>K.ALAHPGIDGLLFTGSAR.T<br>R.TAAILVQSAFLSAGQR.C<br>K.LVELLSAGVPQEVLR.L<br>R.VKAESEAFADLIAR.E<br>R.TEVEAVKVDISVK.A<br>K.DSLADALJAEVRE<br>R.ASIVGGLRDPGSQLVTK.K<br>R.GKVSVDVAEVEIAR.R<br>K.MLALEMGGNNPIVAVDTADIR.T<br>K.AESEAFADLIAR.E<br>R.VTFEAAEAENNTAFGLSAAIIGTQPLYDQFWANAR.A<br>R.LLVGGPDTGK.A<br>R.DPEGSQVTK.K<br>R.ALGAVALLILR.G<br>R.IVGAVALNDVGPQLTAGLDR.I<br>R.TAIDAWMAELPRA.<br>R.IVTYDQKIQAPLR.V<br>R.IVEVPGVGHAPLDPEEAR.T<br>R.VPNGDAGLDLWBPAYR.A<br>R.IRDYVIGAGGSQPTWMHAAR.A<br>R.DFEDLAPHLAQR.R<br>R.AFAELNGAIPYNYGHDWLR.L<br>R.GALSDILAR.S<br>K.TDFPYSNFFPTTK.Q<br>R.HNHVYLISSAR.A<br>R.FSPPTGFYSSAVR.N<br>R.SSGAWAAAGGIGTYSAVNADSYDAEGK.I<br>K.TLQDIAHGGDVEQNLVAFAGHAFNK.T<br>R.AEGISDDVPIVMAGVWYLR.D<br>K.ERHEELJAYADGAVEQVRR.R<br>R.TLDEGDLVLR.F<br>K.TPDNTVFVTEADK.A<br>K.QEAGDHVQLDVGVK.G<br>K.DHDDYTTGYLADPR.S<br>R.DWDDWIDPELQAFQYGRPLTTEESPPIPQAWK.D<br>R.DWYAEGYTEALK.T<br>R.ARDWYAEGYTEALK.T<br>R.AHDIAGGK.G<br>R.AHDIAGGK.G<br>K.VADLMAAVYEDPWLGGHNGLSNAEDPLKPEAPYPR.V<br>K.TPDNTVFVTEADKATR.K<br>R.PLTTEESPPIPQAWK.D<br>R.HEELJAYADGAVEQVRR.A<br>R.HEELJAYADGAVEQVRR.R<br>R.EVWVLVEGGK.G<br>R.DWYAEGYTEALKTPDNTVFVTEADK.A                                                                                                                                                                                                                                                                                                                                                                                                                                                                                                                                                                                                                                                                                                                                                                                                                                                                                                                                                                                                                                                                                                                                                                  |
| YP_615829 | Sala_0776 | 2-nitropropane dioxygenase, NPD                                                | 74.52%            | 24                      | R.DGVHGAAFVVGGMGR.T<br>K.DVPLDLLSYAEACLR.V<br>K.ALAHPGIDGLLFTGSAR.T<br>R.TAAILVQSAFLSAGQR.C<br>K.LVELLSAGVPQEVLR.L<br>R.VKAESEAFADLIAR.E<br>R.TEVEAVKVDISVK.A<br>K.DSLADALJAEVRE<br>R.ASIVGGLRDPGSQLVTK.K<br>R.GKVSVDVAEVEIAR.R<br>K.MLALEMGGNNPIVAVDTADIR.T<br>K.AESEAFADLIAR.E<br>R.VTFEAAEAENNTAFGLSAAIIGTQPLYDQFWANAR.A<br>R.LLVGGPDTGK.A<br>R.DPEGSQVTK.K<br>R.ALGAVALLILR.G<br>R.IVGAVALNDVGPQLTAGLDR.I<br>R.TAIDAWMAELPRA.<br>R.IVTYDQKIQAPLR.V<br>R.IVEVPGVGHAPLDPEEAR.T<br>R.VPNGDAGLDLWBPAYR.A<br>R.IRDYVIGAGGSQPTWMHAAR.A<br>R.DFEDLAPHLAQR.R<br>R.AFAELNGAIPYNYGHDWLR.L<br>R.GALSDILAR.S<br>K.TDFPYSNFFPTTK.Q<br>R.HNHVYLISSAR.A<br>R.FSPPTGFYSSAVR.N<br>R.SSGAWAAAGGIGTYSAVNADSYDAEGK.I<br>K.TLQDIAHGGDVEQNLVAFAGHAFNK.T<br>R.AEGISDDVPIVMAGVWYLR.D<br>K.ERHEELJAYADGAVEQVRR.R<br>R.TLDEGDLVLR.F<br>K.TPDNTVFVTEADK.A<br>K.QEAGDHVQLDVGVK.G<br>K.DHDDYTTGYLADPR.S<br>R.DWDDWIDPELQAFQYGRPLTTEESPPIPQAWK.D<br>R.DWYAEGYTEALK.T<br>R.ARDWYAEGYTEALK.T<br>R.AHDIAGGK.G<br>R.AHDIAGGK.G<br>K.VADLMAAVYEDPWLGGHNGLSNAEDPLKPEAPYPR.V<br>K.TPDNTVFVTEADKATR.K<br>R.PLTTEESPPIPQAWK.D<br>R.HEELJAYADGAVEQVRR.A<br>R.HEELJAYADGAVEQVRR.R<br>R.EVWVLVEGGK.G<br>R.DWYAEGYTEALKTPDNTVFVTEADK.A                                                                                                                                                                                                                                                                                                                                                                                                                                                                                                                                                                                                                                                                                                                                                                                                                                                                                                                                                                                                                                                                                                                                                                  |
| YP_615831 | Sala_0778 | Glycolate reductase                                                            | 45.48%            | 9                       | K.GLKLKLYGGR.E<br>R.RLPEAEIEELGASVHSDVTLR.I<br>R.IAGAGLDVYTHEPAVDPALLALQNVLLPHLGSATIEGR.E<br>K.ALIAALQTR.I<br>R.LPEAEIEELGASVHSDVTLR.I<br>K.LIANFAGVGDHDLAAAR.A<br>R.IGAMKPTAYLINTAR.G<br>R.GETVDEKALIAALQTR.I<br>R.AFGLSIHYHR.R<br>K.GIMVSNTPGVTEADTMDTALLSVPR.R<br>R.KGPSIDVPLWEYR.R<br>R.KGPSIDVPLWEYR.R<br>R.IITTLIALQR.H<br>R.RGDVVDVTEAPGK.A<br>R.LVAHAHAQEPK.D<br>K.INVHGGATLGHPIGASGT.R<br>R.AMGTFAQDTADAYQLSR.Q<br>R.AGVSGDDIER.I<br>K.DFTVAVPGAINK.L<br>R.QAMDDYTLTSLR.A<br>R.IGHDTAYDHFMLDGLEDAVDAGR.A<br>K.DGTITAATSSSISDGAADVLR.Q<br>K.AAIAEGAFVAEIAPIVTSGR.R<br>R.LVAHAHAQEPKDFTVAVPGAINK.L<br>R.TPMGSMQSLSDASATDLGATAVK.A<br>R.GD VWVDTDEAPGK.A<br>R.AKAAAECAFVAEIAPIVTSGR.R<br>K.IPTLPAFAK.D<br>K.SVQATTVVK.V<br>R.TPMGSMQSLSDASATDLGATAVK.A<br>R.IYMGCVLPAGLGQAPAR.Q<br>R.AMGTFAQDTADAYQLSR.Q<br>R.QSVADAK.G<br>R.IGHDTAYDHFMLDGLEDAVDAGR.A<br>R.EHVIVLSDHSR.L<br>R.QTLAGLAGEDQPKLR.L<br>R.AIGINGTVPGLIR.L<br>R.VLYHDLVALDRNPDVR.A<br>R.HGEPGQGLDVGHR.V<br>R.MDPTDVAOVNGSTYTFVLVNGVYQDNWTFALFRPGR.V<br>R.GFVNGALGGGALAALACYPAWAPVYVAGIAPPLPSVSGTDIRL.I<br>R.AGLFAPVPLR.A<br>K.MSDHHEPIFPLTGER.V                                                                                                                                                                                                                                                                                                                                                                                                                                                                                                                                                                                                                                                                                                                                                                                                                                                                                                                                                                                                                                                                                                                                                                                                                                                 |
| YP_615832 | Sala_0779 | protein of unknown function DUF1058                                            | 12.39%            | 2                       | R.RGDVVDVTEAPGK.A<br>R.LVAHAHAQEPK.D<br>K.INVHGGATLGHPIGASGT.R<br>R.AMGTFAQDTADAYQLSR.Q<br>R.AGVSGDDIER.I<br>K.DFTVAVPGAINK.L<br>R.QAMDDYTLTSLR.A<br>R.IGHDTAYDHFMLDGLEDAVDAGR.A<br>K.DGTITAATSSSISDGAADVLR.Q<br>K.AAIAEGAFVAEIAPIVTSGR.R<br>R.LVAHAHAQEPKDFTVAVPGAINK.L<br>R.TPMGSMQSLSDASATDLGATAVK.A<br>R.GD VWVDTDEAPGK.A<br>R.AKAAAECAFVAEIAPIVTSGR.R<br>K.IPTLPAFAK.D<br>K.SVQATTVVK.V<br>R.TPMGSMQSLSDASATDLGATAVK.A<br>R.IYMGCVLPAGLGQAPAR.Q<br>R.AMGTFAQDTADAYQLSR.Q<br>R.QSVADAK.G<br>R.IGHDTAYDHFMLDGLEDAVDAGR.A<br>R.EHVIVLSDHSR.L<br>R.QTLAGLAGEDQPKLR.L<br>R.AIGINGTVPGLIR.L<br>R.VLYHDLVALDRNPDVR.A<br>R.HGEPGQGLDVGHR.V<br>R.MDPTDVAOVNGSTYTFVLVNGVYQDNWTFALFRPGR.V<br>R.GFVNGALGGGALAALACYPAWAPVYVAGIAPPLPSVSGTDIRL.I<br>R.AGLFAPVPLR.A<br>K.MSDHHEPIFPLTGER.V                                                                                                                                                                                                                                                                                                                                                                                                                                                                                                                                                                                                                                                                                                                                                                                                                                                                                                                                                                                                                                                                                                                                                                                                                                                                                                                                                                                                                                                                                                                                                                                  |
| YP_615834 | Sala_0781 | Acetyl-CoA C-acetyltransferase                                                 | 61.77%            | 22                      | R.RGDVVDVTEAPGK.A<br>R.LVAHAHAQEPK.D<br>K.INVHGGATLGHPIGASGT.R<br>R.AMGTFAQDTADAYQLSR.Q<br>R.AGVSGDDIER.I<br>K.DFTVAVPGAINK.L<br>R.QAMDDYTLTSLR.A<br>R.IGHDTAYDHFMLDGLEDAVDAGR.A<br>K.DGTITAATSSSISDGAADVLR.Q<br>K.AAIAEGAFVAEIAPIVTSGR.R<br>R.LVAHAHAQEPKDFTVAVPGAINK.L<br>R.TPMGSMQSLSDASATDLGATAVK.A<br>R.GD VWVDTDEAPGK.A<br>R.AKAAAECAFVAEIAPIVTSGR.R<br>K.IPTLPAFAK.D<br>K.SVQATTVVK.V<br>R.TPMGSMQSLSDASATDLGATAVK.A<br>R.IYMGCVLPAGLGQAPAR.Q<br>R.AMGTFAQDTADAYQLSR.Q<br>R.QSVADAK.G<br>R.IGHDTAYDHFMLDGLEDAVDAGR.A<br>R.EHVIVLSDHSR.L<br>R.QTLAGLAGEDQPKLR.L<br>R.AIGINGTVPGLIR.L<br>R.VLYHDLVALDRNPDVR.A<br>R.HGEPGQGLDVGHR.V<br>R.MDPTDVAOVNGSTYTFVLVNGVYQDNWTFALFRPGR.V<br>R.GFVNGALGGGALAALACYPAWAPVYVAGIAPPLPSVSGTDIRL.I<br>R.AGLFAPVPLR.A<br>K.MSDHHEPIFPLTGER.V                                                                                                                                                                                                                                                                                                                                                                                                                                                                                                                                                                                                                                                                                                                                                                                                                                                                                                                                                                                                                                                                                                                                                                                                                                                                                                                                                                                                                                                                                                                                                                                  |
| YP_615837 | Sala_0784 | Copper-resistance protein CopA                                                 | 30.51%            | 9                       | R.RGDVVDVTEAPGK.A<br>R.LVAHAHAQEPK.D<br>K.INVHGGATLGHPIGASGT.R<br>R.AMGTFAQDTADAYQLSR.Q<br>R.AGVSGDDIER.I<br>K.DFTVAVPGAINK.L<br>R.QAMDDYTLTSLR.A<br>R.IGHDTAYDHFMLDGLEDAVDAGR.A<br>K.DGTITAATSSSISDGAADVLR.Q<br>K.AAIAEGAFVAEIAPIVTSGR.R<br>R.LVAHAHAQEPKDFTVAVPGAINK.L<br>R.TPMGSMQSLSDASATDLGATAVK.A<br>R.GD VWVDTDEAPGK.A<br>R.AKAAAECAFVAEIAPIVTSGR.R<br>K.IPTLPAFAK.D<br>K.SVQATTVVK.V<br>R.TPMGSMQSLSDASATDLGATAVK.A<br>R.IYMGCVLPAGLGQAPAR.Q<br>R.AMGTFAQDTADAYQLSR.Q<br>R.QSVADAK.G<br>R.IGHDTAYDHFMLDGLEDAVDAGR.A<br>R.EHVIVLSDHSR.L<br>R.QTLAGLAGEDQPKLR.L<br>R.AIGINGTVPGLIR.L<br>R.VLYHDLVALDRNPDVR.A<br>R.HGEPGQGLDVGHR.V<br>R.MDPTDVAOVNGSTYTFVLVNGVYQDNWTFALFRPGR.V<br>R.GFVNGALGGGALAALACYPAWAPVYVAGIAPPLPSVSGTDIRL.I<br>R.AGLFAPVPLR.A<br>K.MSDHHEPIFPLTGER.V                                                                                                                                                                                                                                                                                                                                                                                                                                                                                                                                                                                                                                                                                                                                                                                                                                                                                                                                                                                                                                                                                                                                                                                                                                                                                                                                                                                                                                                                                                                                                                                  |

| Accession | Locus tag | Description                                       | Sequence coverage | No. peptides identified | List of peptides identified                                                                                                                                                                                                                                                                                                                                                                                                                                                                                                                                                                                                                                                                                                                                                                                                                                                                                                                                                                                                                                                                                                                                                                                                                                                                                                                                                                                                                                                                                                                                                                                                                                                                                                                                                                                                                                                                                                                                                                                                                                                                                                                                                                                                                                                                                                                                                                                                                                                                                                                                                                                                                                                                                                                                                                                                                                                                                                                                                                                                                                                                                                                                                        |
|-----------|-----------|---------------------------------------------------|-------------------|-------------------------|------------------------------------------------------------------------------------------------------------------------------------------------------------------------------------------------------------------------------------------------------------------------------------------------------------------------------------------------------------------------------------------------------------------------------------------------------------------------------------------------------------------------------------------------------------------------------------------------------------------------------------------------------------------------------------------------------------------------------------------------------------------------------------------------------------------------------------------------------------------------------------------------------------------------------------------------------------------------------------------------------------------------------------------------------------------------------------------------------------------------------------------------------------------------------------------------------------------------------------------------------------------------------------------------------------------------------------------------------------------------------------------------------------------------------------------------------------------------------------------------------------------------------------------------------------------------------------------------------------------------------------------------------------------------------------------------------------------------------------------------------------------------------------------------------------------------------------------------------------------------------------------------------------------------------------------------------------------------------------------------------------------------------------------------------------------------------------------------------------------------------------------------------------------------------------------------------------------------------------------------------------------------------------------------------------------------------------------------------------------------------------------------------------------------------------------------------------------------------------------------------------------------------------------------------------------------------------------------------------------------------------------------------------------------------------------------------------------------------------------------------------------------------------------------------------------------------------------------------------------------------------------------------------------------------------------------------------------------------------------------------------------------------------------------------------------------------------------------------------------------------------------------------------------------------------|
| YP_615838 | Sala_0785 | copper resistance B precursor                     | 16.20%            | 3                       | R.VGFVSLNLAEQAR.K<br>K.SEGETVFGGEVAAEQQLYSR.A<br>R.ADGEEDVSLGIVAGVK.L<br>R.DPEYLAVDGTK.A<br>R.VPTLDEVYPVK.M<br>K.LKGYGDITEK.Q<br>R.LVKGDEITLGG.K<br>K.AQEMALVAEQSLPERDPEYLAVDGTK.A<br>R.REYGPQHQQR.R<br>K.GDTGQNLIGLLER.R<br>R.RLDAVYR.A<br>R.MKGDGQNLIGLLER.R<br>K.MEPNLVVEFYSR.<br>R.EYGPQHQQR.R<br>R.MGENIWGRPK.S<br>K.MSDFGQLR.A<br>R.QLVSHGHVYVWGVK.C<br>K.NYIEASR.M<br>K.AQEMALVAEQSLPER.D<br>K.GYYGDIKTEK.Q<br>R.VPTLDEVYPVKMEPNLVEFYSR.<br>K.FTPTIFSR.Q<br>K.ATVVRVPTLDEVYPVK.M<br>R.VPTLDEVYPVKMEPNLVEFYSR.<br>R.MKGDGQNLIGLLER.R<br>R.MGENIWGRPK.S<br>R.LVKGDEITLGGK.A<br>R.AKFTPTIFSR.Q<br>K.MSDFGQLR.A<br>K.MEPNLVVEFYSR.<br>K.KAQEMALVAEQSLPERDPEYLAVDGTK.A<br>K.KAQEMALVAEQSLPERDPEYLAVDGTK.A<br>K.KAQEMALVAEQSLPER.D<br>K.KAQEMALVAEQSLPERDPEYLAVDGTK.A<br>K.AQEMALVAEQSLPER.D<br>R.LDAVYR.A<br>K.KNYIEASR.M<br>K.KAQEMALVAEQSLPER.D<br>R.DGWPNDGAPASAGADVLAGAR.V<br>R.AMLNFGITEL.L<br>R.VFETLAEVAADCTDIYATVR.K<br>R.SAYVFGPER.S<br>K.TGWSHNDIR.M<br>R.DFEFFASTITEAARPIK.<br>R.QLETSGENEVQASQIGAMVMEALK.G<br>R.DFTTEARDFEFFASTITEAAR.P<br>R.DFEFFASTITEAAR.P<br>K.GFDNVAVIR.F<br>K.SAGYFTDGAIVDPAAAAAMTR.E<br>R.INSVAFPGQLGGPLMHVIAAK.A<br>R.DKGEHGDADVEADV.R.G<br>R.ADDHLVDFDQVEALAR.E<br>R.EHNPALTAGSAYPR.T<br>R.GADIVAGGDTHLALIDLRLPLGITGR.D<br>R.AVLEAQGSVFTNK.Y<br>K.ATIANAQALANR.L<br>K.WFNVAQYVGR.A<br>K.AVAFGEALRPEFK.D<br>R.GGMILTNDIAIKR.R<br>R.ELERQYQIELIASENIVSR.A<br>R.GGMILTNDIAIKR.I<br>R.DADEALER.S<br>K.GEHGDADVEADV.R.G<br>R.GFGIAEFEAIGDMADVLDALR.D<br>K.NGVPPDLPFK.T<br>K.YAEGYRGR.R<br>R.YYQGCAPSDEVEQLAIDR.A<br>R.TLDFAR.F<br>R.GFGIAEFEAIGDMADVLDALR.D<br>R.EQYQIELIASENIVSR.A<br>K.YAEGYRGR.Y<br>K.AVAFGEALRPEFKYAK.A<br>R.IAIAADHAAYELK.A<br>K.LSNPQLETSR.<br>R.EKGEHEVDLGTNGPDSVDYDYGRL<br>R.EHNDANVIAMGAR.L<br>K.GHEVEDLGTNGPDSVDYDYGRL<br>R.ANIHFFHELDQLMK.S<br>R.APVALILHPHQQGGTMNDR.I<br>K.SLDNYLDMR.L<br>K.GITIHHEIPR.A<br>R.APVALILHPHQQGGTMNDR.I<br>K.SLDNYLDMR.L<br>R.AAAAAVEVAR.D<br>R.VFFTSGATELWALLR.G<br>R.AMGVSEADAR.A<br>R.YTSEQELR.D<br>R.LDKDASHVER.L<br>R.DQVAALLPGGGR.V<br>R.SSAGLMAALEGNSGGGATDLAR.A<br>K.EGVEAPEAIIWLANAAEGSVR.D<br>R.DGLSILDQAIAHADLDGGK.V<br>R.LVYAPVSALDGFAR.R<br>R.VIYAASLPDPGELAK.L<br>R.LVFGDNNQHR.S<br>R.AQIALGIEPAMVR.G<br>K.LLESGGPAMPVAAAAATGSR.A<br>R.LWQLLK.G<br>R.LLESTGHHQLAR.Q<br>R.ITPDMLEFAHFSAILQK.E<br>R.GLMELTHAITLAK.V<br>K.FLIFATTEVKNVPTLSR.C<br>K.ALNCIGPDGQGGTIDPCGVCEPCRAITEGR.H<br>R.LDSVEVEVSGGGVLK.I<br>K.AAQEAAAQVQMQEAQAR.L<br>K.TVLIPEENEKDLVEIPANITSGLK.I<br>R.SVVDQFENYAK.L<br>K.AESVITIPENLSDFSGVR.K<br>R.NYLDLIGLPWKK.K<br>K.AQALDDHYALEK.V<br>R.ELGNDGEGGDDLAELQK.I<br>R.LADSVAGNLNIK.V<br>R.GDPASALLELDPEQNAK.F<br>K.LGCVTESVQAALSFK.A<br>R.LEGYTEDEKVEIAK.R<br>R.DIVFPHMVPLFVGR.D<br>K.MPAETAVALSQIDDASR.L<br>K.DGPSAGVMVTAMISTLTGIADR.R<br>K.VADKQALLVEDAPSK.R<br>K.I.LALTEDR.A<br>R.IVEYLAVQAR.T<br>R.HGISDLEDOVAVTGLAWTEVGGELLTIEAVTASGK.G<br>R.APAYGKPSLFAR.K<br>K.AESVITIPENLSDFSGVR.Y<br>K.QALLVEDAPSKR.L<br>K.DLVEIPANITSGLK.I<br>R.SVAALAAAMEAGK.E<br>R.NYLDLIGLPWKK.S<br>K.QALLVEDAPSK.R<br>K.MPAETAVALSQIDDASR.L<br>K.AGTMNPLFLDEIDKLGQDFR.G<br>R.TYIGSLPGK.I<br>R.AMAPSIAEATVR.N<br>K.QVEAHGLKGEFELTEDGLR.D<br>R.QSLGGVRDEAER.G<br>R.KDIHHPGAVPK.D |
| YP_615839 | Sala_0786 | RNA-binding S4                                    | 88.67%            | 35                      |                                                                                                                                                                                                                                                                                                                                                                                                                                                                                                                                                                                                                                                                                                                                                                                                                                                                                                                                                                                                                                                                                                                                                                                                                                                                                                                                                                                                                                                                                                                                                                                                                                                                                                                                                                                                                                                                                                                                                                                                                                                                                                                                                                                                                                                                                                                                                                                                                                                                                                                                                                                                                                                                                                                                                                                                                                                                                                                                                                                                                                                                                                                                                                                    |
| YP_615841 | Sala_0788 | tRNA/rRNA methyltransferase (SpoU)                | 29.44%            | 5                       |                                                                                                                                                                                                                                                                                                                                                                                                                                                                                                                                                                                                                                                                                                                                                                                                                                                                                                                                                                                                                                                                                                                                                                                                                                                                                                                                                                                                                                                                                                                                                                                                                                                                                                                                                                                                                                                                                                                                                                                                                                                                                                                                                                                                                                                                                                                                                                                                                                                                                                                                                                                                                                                                                                                                                                                                                                                                                                                                                                                                                                                                                                                                                                                    |
| YP_615842 | Sala_0789 | Protein of unknown function DUF193                | 45.16%            | 5                       |                                                                                                                                                                                                                                                                                                                                                                                                                                                                                                                                                                                                                                                                                                                                                                                                                                                                                                                                                                                                                                                                                                                                                                                                                                                                                                                                                                                                                                                                                                                                                                                                                                                                                                                                                                                                                                                                                                                                                                                                                                                                                                                                                                                                                                                                                                                                                                                                                                                                                                                                                                                                                                                                                                                                                                                                                                                                                                                                                                                                                                                                                                                                                                                    |
| YP_615844 | Sala_0791 | Glycine hydroxymethyltransferase                  | 63.68%            | 25                      |                                                                                                                                                                                                                                                                                                                                                                                                                                                                                                                                                                                                                                                                                                                                                                                                                                                                                                                                                                                                                                                                                                                                                                                                                                                                                                                                                                                                                                                                                                                                                                                                                                                                                                                                                                                                                                                                                                                                                                                                                                                                                                                                                                                                                                                                                                                                                                                                                                                                                                                                                                                                                                                                                                                                                                                                                                                                                                                                                                                                                                                                                                                                                                                    |
| YP_615845 | Sala_0792 | sugar-phosphate isomerases, RpiB/LacA/LacB family | 41.33%            | 5                       |                                                                                                                                                                                                                                                                                                                                                                                                                                                                                                                                                                                                                                                                                                                                                                                                                                                                                                                                                                                                                                                                                                                                                                                                                                                                                                                                                                                                                                                                                                                                                                                                                                                                                                                                                                                                                                                                                                                                                                                                                                                                                                                                                                                                                                                                                                                                                                                                                                                                                                                                                                                                                                                                                                                                                                                                                                                                                                                                                                                                                                                                                                                                                                                    |
| YP_615846 | Sala_0793 | hydrolase                                         | 24.77%            | 6                       |                                                                                                                                                                                                                                                                                                                                                                                                                                                                                                                                                                                                                                                                                                                                                                                                                                                                                                                                                                                                                                                                                                                                                                                                                                                                                                                                                                                                                                                                                                                                                                                                                                                                                                                                                                                                                                                                                                                                                                                                                                                                                                                                                                                                                                                                                                                                                                                                                                                                                                                                                                                                                                                                                                                                                                                                                                                                                                                                                                                                                                                                                                                                                                                    |
| YP_615847 | Sala_0794 | aminotransferase, class V                         | 18.46%            | 6                       |                                                                                                                                                                                                                                                                                                                                                                                                                                                                                                                                                                                                                                                                                                                                                                                                                                                                                                                                                                                                                                                                                                                                                                                                                                                                                                                                                                                                                                                                                                                                                                                                                                                                                                                                                                                                                                                                                                                                                                                                                                                                                                                                                                                                                                                                                                                                                                                                                                                                                                                                                                                                                                                                                                                                                                                                                                                                                                                                                                                                                                                                                                                                                                                    |
| YP_615849 | Sala_0796 | DNA polymerase III, subunits gamma and tau        | 44.42%            | 15                      |                                                                                                                                                                                                                                                                                                                                                                                                                                                                                                                                                                                                                                                                                                                                                                                                                                                                                                                                                                                                                                                                                                                                                                                                                                                                                                                                                                                                                                                                                                                                                                                                                                                                                                                                                                                                                                                                                                                                                                                                                                                                                                                                                                                                                                                                                                                                                                                                                                                                                                                                                                                                                                                                                                                                                                                                                                                                                                                                                                                                                                                                                                                                                                                    |
| YP_615850 | Sala_0797 | conserved hypothetical protein 103                | 31.53%            | 2                       |                                                                                                                                                                                                                                                                                                                                                                                                                                                                                                                                                                                                                                                                                                                                                                                                                                                                                                                                                                                                                                                                                                                                                                                                                                                                                                                                                                                                                                                                                                                                                                                                                                                                                                                                                                                                                                                                                                                                                                                                                                                                                                                                                                                                                                                                                                                                                                                                                                                                                                                                                                                                                                                                                                                                                                                                                                                                                                                                                                                                                                                                                                                                                                                    |
| YP_615851 | Sala_0798 | ATP-dependent protease La                         | 53.88%            | 36                      |                                                                                                                                                                                                                                                                                                                                                                                                                                                                                                                                                                                                                                                                                                                                                                                                                                                                                                                                                                                                                                                                                                                                                                                                                                                                                                                                                                                                                                                                                                                                                                                                                                                                                                                                                                                                                                                                                                                                                                                                                                                                                                                                                                                                                                                                                                                                                                                                                                                                                                                                                                                                                                                                                                                                                                                                                                                                                                                                                                                                                                                                                                                                                                                    |





| Accession | Locus tag | Description                                              | Sequence coverage | No. peptides identified | List of peptides identified                                                                                                                                                                                                                                                                                                                                                                                                                                                                                                                                                                                                                                                                                                                                                                                                                                                                                                                                                                                                                                                                                                                                                                                                                                                                                                                                                                                                                                                                                                                                                                                                                                                                                                                                                                                                                                                                                                                                                                                                                                                                                                                                                                                                                                                                                                                                                                                                                                                                                                                                                                                                                                                                                                                                                                                                                                                                                                                                                                                                                                                                                                                                                                                                                                                                                                                                                                                                                                                              |
|-----------|-----------|----------------------------------------------------------|-------------------|-------------------------|------------------------------------------------------------------------------------------------------------------------------------------------------------------------------------------------------------------------------------------------------------------------------------------------------------------------------------------------------------------------------------------------------------------------------------------------------------------------------------------------------------------------------------------------------------------------------------------------------------------------------------------------------------------------------------------------------------------------------------------------------------------------------------------------------------------------------------------------------------------------------------------------------------------------------------------------------------------------------------------------------------------------------------------------------------------------------------------------------------------------------------------------------------------------------------------------------------------------------------------------------------------------------------------------------------------------------------------------------------------------------------------------------------------------------------------------------------------------------------------------------------------------------------------------------------------------------------------------------------------------------------------------------------------------------------------------------------------------------------------------------------------------------------------------------------------------------------------------------------------------------------------------------------------------------------------------------------------------------------------------------------------------------------------------------------------------------------------------------------------------------------------------------------------------------------------------------------------------------------------------------------------------------------------------------------------------------------------------------------------------------------------------------------------------------------------------------------------------------------------------------------------------------------------------------------------------------------------------------------------------------------------------------------------------------------------------------------------------------------------------------------------------------------------------------------------------------------------------------------------------------------------------------------------------------------------------------------------------------------------------------------------------------------------------------------------------------------------------------------------------------------------------------------------------------------------------------------------------------------------------------------------------------------------------------------------------------------------------------------------------------------------------------------------------------------------------------------------------------------------|
| YP_615894 | Sala_0843 | trigger factor                                           | 46.69%            | 31                      | K.RQVALIESGGVEVQETR.L<br>K.MLESGDGAIAIVDREGLK.Q<br>R.YFPDPLLPLELDDAFLEECR.A<br>K.LFSGATAFGAEPNTQVSLVDAAMPGLMPVNR.E<br>R.LYDPRDRETR.S<br>R.KNYFYADLPQGYQISLVHPLVGEGLTIADEK.A<br>K.LFSGATAFGAEPNTQVSLVDAAMPGLMPVNR.E<br>K.EALGFVFGQTMK.A<br>K.VTFPEYDYPVETLK.G<br>R.LGLLSEIGQAHGVQVSSQEMQR.L<br>R.FVEYQQDALAAQLR.A<br>R.APLYEDKVVDFLEK.A<br>K.SLGLLESLDKL.K.E<br>K.VVDFLEK.A<br>R.LTVPADDKAVMAK.I<br>K.IEEFAAQMK.R<br>K.TVETLNEGLK.R.E<br>K.ELMKDQVEQLNGLTR.T<br>K.VPAATKIDDEFK.S<br>K.MHGAALSADALNK.A<br>K.LRPAALQPAVTLADGYEAGK.D<br>K.LAEFAVTVK.E<br>K.DQVEQELNGLTR.T<br>R.KMHGAALSADALNK.A<br>K.AAAEKEAPEAK.K<br>K.EAVKDEAK.A<br>R.LIMQAAQYRVEDR.Q<br>R.APLYEDK.V<br>K.SLGLLESLDK.L<br>R.LGLLSEIGQAHGVQVSSQEMQR.L<br>K.IEEFAAQMK.R<br>K.EAVKDEAKAEAPAK.K<br>R.QRFVEYQQDALAAQLR.A<br>R.PALQPAVTLADGYEAGK.D<br>K.TVETLNEGLK.R<br>K.EAVKDEAK.A<br>K.IDDEFK.S<br>K.AIDAGVRDLMAK.E<br>K.AEAKPAAK.K<br>R.ALGNAGYPEPR.I<br>R.TWVGQVSAARSTIWNK.L<br>R.EALGQLDLPPVPISYADVADLAR.L<br>R.SASGALETVPWVR.V<br>R.SAAAFDAAAIQTQDR.H<br>R.RPLVLLDQVTDPHNIGAVLR.S<br>R.HAVLALANPDR.A<br>R.MESLNSIAAAIALYAVATASK.<br>R.IGLMGDITETLGETLDGSK.V<br>R.ALEAEAEQYWR.I<br>R.DAPHQGLVIEVDPDGVHLGDLQEEVDAESR.R<br>R.SAAAFDAAAIQTQDRSPPEGSVIAR.S<br>K.VALLVGESEGDGMR.H<br>R.TTILGTPDNRGR.V<br>R.EAATQYHSENEAGWK.S<br>R.AHIVPLSEALAVLVK.A<br>K.TPDAVQAAYR.R<br>K.PSYSRLALDLLITGVRSQEVRL.L<br>R.YAGVYLESQGTTIADLYAAR.L<br>R.ILEAESLISVVR.G<br>R.VKDILAELEMLQDTR.H<br>R.HAEFVDNIAVHFQALVEATGNNTLSFMNR.M<br>K.TSELVADQIR.A<br>R.NANETWAQR.G<br>R.NHQNDYQR.R<br>R.GELQEGDSLPEEGTLMATLIGSRPTLR.E<br>K.MIEEGDEGAVAHWR.L<br>R.LAIEPTVVR.W<br>K.TSELVADQIRAIIR.G<br>K.VALLGTTTLATELGR.M<br>R.AYAVGLANAGASVVADLNKEGAER.V<br>K.IVNLQISAGAFPAQTPIYGISK.V<br>R.LNAGGVYNNGGQINPHPTFGGIGISGFGK.E<br>K.QTVQADIPLAGAK.E<br>K.AGIDFLHYK.T<br>R.ASAEALAQSGVK.V<br>.MKLDNSIAAVTGGASGLGR.A<br>K.VDITSEDSVAGYEAAAR.A<br>K.VAIFDVNEEGR.A<br>R.VNSIMPGFATPPMLAVK.D<br>R.APAIFEGLAASVPPFK.R<br>R.NSYFNGQNL.R.L<br>K.DRAPAIFEGLAASVPPFK.R<br>K.VDAAFQDSGPNQGSR.T<br>R.VYGEIEEGSR.L<br>R.KEGEYLITGR.D<br>K.YNDEAWDPVFAK.A<br>R.APSQIIDDQVWASFQHDR.G<br>R.VVDFLEGLDVSEAVR.R<br>K.GFTAAMLPATTGNLKP.Y<br>R.FAVNVLQIQGQPTSNR.F<br>R.LLDLDFSEAVVERLAGAPR.A<br>R.GGSELVPSDDAAAFVATFPDGLAEVEDR.A<br>K.TGEDFVYVYVVDLDGAPGR.L<br>R.LLPGDQIQITTPDTEPFVQAAE.E<br>K.VAVEVTPQEDVWLPNFR.K<br>R.WTARVASASGAPSQLEGVV.V<br>R.VASSASGAPSQLEGVV.V<br>R.IGALYENDGYR.A<br>R.YSTAEQALPLILLNSDAAR.F<br>K.VAGDAVLSAFK.A<br>R.TSLLLDIAADAASDRPALGSGEEAIDFGTYR.A<br>R.IAFASGDPAIR.R<br>R.ASCEGSTVTVR.G<br>K.VSNFIANDTTQPLFLDPSQGAATAAR.Q<br>K.GVYDTSQYGTDTVPEISGIIK.T<br>R.VGAGGSQASAGNPALLPYK.S<br>R.SDFGNLAAEGVAGVEVYK.S<br>R.FANIEENRPGPTDIYQVQNAAYDFYDFQR.E<br>R.ASLEQAQNIKR.N<br>K.DLAITGAVGSNR.N<br>R.LVGYHLINETK.L<br>R.ASGAFFSALDRYDLLEPFALDVPR.A<br>R.LLGSIEGDVLTPEPNFIGYR.T<br>R.TVASLPAHGAYIAR.Y<br>R.SADEVSTSSASSAPAFDPQPHLILNLAIGGR.L<br>R.AGSSSPTAKVTREYSSARITRGA.A<br>R.IAFIAGSEYPLSQWR.V<br>R.ELGIEIPSQLSLVDFNTPIVR.F<br>R.EELNQAHVHGGITLHDVIDDR.F<br>K.GADGLIPVAAGAGGHAGR.Q<br>R.AADIVSNLFTGVHGNLRL.Q<br>R.EWFDQVWVPLSAGIGHGR.S<br>K.AGIVGSFPALNAR.P<br>R.PQSLDEWLHR.I<br>R.LPVIGSPLFVSGPDLVIAQCK.A<br>K.SNDRLEADIACTAK.W<br>K.DIWSSGGIGAGVSNRPAEVAELETQYLAAR.R<br>R.SILAAQACGADLAYSASFATIAEANADEGVKNGIVEGR.A<br>R.SILAAQACGADLAYSASFATIAEANADEGVK.N<br>K.VPITITSLGAR.E<br>R.IAIDPADIPEGAETVDAR.G<br>R.LGLSSAPAIEMAIAR.D<br>R.DLSLVEETGAPVHFR.Q<br>K.GGKPDVWVPLAANTK.G<br>R.LPFAEALPGMAGAEITLAMGLNLRV.D<br>R.AALMPDNGPLDGVGLVER.A<br>R.LAGLTIINAFENSTR.T |
| YP_615895 | Sala_0844 | HhH-GPD                                                  | 14.15%            | 2                       | R.LGLLSEIGQAHGVQVSSQEMQR.L                                                                                                                                                                                                                                                                                                                                                                                                                                                                                                                                                                                                                                                                                                                                                                                                                                                                                                                                                                                                                                                                                                                                                                                                                                                                                                                                                                                                                                                                                                                                                                                                                                                                                                                                                                                                                                                                                                                                                                                                                                                                                                                                                                                                                                                                                                                                                                                                                                                                                                                                                                                                                                                                                                                                                                                                                                                                                                                                                                                                                                                                                                                                                                                                                                                                                                                                                                                                                                                               |
| YP_615897 | Sala_0846 | RNA methyltransferase TrmH, group 3                      | 70.96%            | 11                      | R.SASGALETVPWVR.V<br>R.SAAAFDAAAIQTQDR.H<br>R.RPLVLLDQVTDPHNIGAVLR.S<br>R.HAVLALANPDR.A<br>R.MESLNSIAAAIALYAVATASK.<br>R.IGLMGDITETLGETLDGSK.V<br>R.ALEAEAEQYWR.I<br>R.DAPHQGLVIEVDPDGVHLGDLQEEVDAESR.R<br>R.SAAAFDAAAIQTQDRSPPEGSVIAR.S<br>K.VALLVGESEGDGMR.H<br>R.TTILGTPDNRGR.V<br>R.EAATQYHSENEAGWK.S<br>R.AHIVPLSEALAVLVK.A<br>K.TPDAVQAAYR.R<br>K.PSYSRLALDLLITGVRSQEVRL.L<br>R.YAGVYLESQGTTIADLYAAR.L<br>R.ILEAESLISVVR.G<br>R.VKDILAELEMLQDTR.H<br>R.HAEFVDNIAVHFQALVEATGNNTLSFMNR.M<br>K.TSELVADQIR.A<br>R.NANETWAQR.G<br>R.NHQNDYQR.R<br>R.GELQEGDSLPEEGTLMATLIGSRPTLR.E<br>K.MIEEGDEGAVAHWR.L<br>R.LAIEPTVVR.W<br>K.TSELVADQIRAIIR.G<br>K.VALLGTTTLATELGR.M<br>R.AYAVGLANAGASVVADLNKEGAER.V<br>K.IVNLQISAGAFPAQTPIYGISK.V<br>R.LNAGGVYNNGGQINPHPTFGGIGISGFGK.E<br>K.QTVQADIPLAGAK.E<br>K.AGIDFLHYK.T<br>R.ASAEALAQSGVK.V<br>.MKLDNSIAAVTGGASGLGR.A<br>K.VDITSEDSVAGYEAAAR.A<br>K.VAIFDVNEEGR.A<br>R.VNSIMPGFATPPMLAVK.D<br>R.APAIFEGLAASVPPFK.R<br>R.NSYFNGQNL.R.L<br>K.DRAPAIFEGLAASVPPFK.R<br>K.VDAAFQDSGPNQGSR.T<br>R.VYGEIEEGSR.L<br>R.KEGEYLITGR.D<br>K.YNDEAWDPVFAK.A<br>R.APSQIIDDQVWASFQHDR.G<br>R.VVDFLEGLDVSEAVR.R<br>K.GFTAAMLPATTGNLKP.Y<br>R.FAVNVLQIQGQPTSNR.F<br>R.LLDLDFSEAVVERLAGAPR.A<br>R.GGSELVPSDDAAAFVATFPDGLAEVEDR.A<br>K.TGEDFVYVYVVDLDGAPGR.L<br>R.LLPGDQIQITTPDTEPFVQAAE.E<br>K.VAVEVTPQEDVWLPNFR.K<br>R.WTARVASASGAPSQLEGVV.V<br>R.VASSASGAPSQLEGVV.V<br>R.IGALYENDGYR.A<br>R.YSTAEQALPLILLNSDAAR.F<br>K.VAGDAVLSAFK.A<br>R.TSLLLDIAADAASDRPALGSGEEAIDFGTYR.A<br>R.IAFASGDPAIR.R<br>R.ASCEGSTVTVR.G<br>K.VSNFIANDTTQPLFLDPSQGAATAAR.Q<br>K.GVYDTSQYGTDTVPEISGIIK.T<br>R.VGAGGSQASAGNPALLPYK.S<br>R.SDFGNLAAEGVAGVEVYK.S<br>R.FANIEENRPGPTDIYQVQNAAYDFYDFQR.E<br>R.ASLEQAQNIKR.N<br>K.DLAITGAVGSNR.N<br>R.LVGYHLINETK.L<br>R.ASGAFFSALDRYDLLEPFALDVPR.A<br>R.LLGSIEGDVLTPEPNFIGYR.T<br>R.TVASLPAHGAYIAR.Y<br>R.SADEVSTSSASSAPAFDPQPHLILNLAIGGR.L<br>R.AGSSSPTAKVTREYSSARITRGA.A<br>R.IAFIAGSEYPLSQWR.V<br>R.ELGIEIPSQLSLVDFNTPIVR.F<br>R.EELNQAHVHGGITLHDVIDDR.F<br>K.GADGLIPVAAGAGGHAGR.Q<br>R.AADIVSNLFTGVHGNLRL.Q<br>R.EWFDQVWVPLSAGIGHGR.S<br>K.AGIVGSFPALNAR.P<br>R.PQSLDEWLHR.I<br>R.LPVIGSPLFVSGPDLVIAQCK.A<br>K.SNDRLEADIACTAK.W<br>K.DIWSSGGIGAGVSNRPAEVAELETQYLAAR.R<br>R.SILAAQACGADLAYSASFATIAEANADEGVKNGIVEGR.A<br>R.SILAAQACGADLAYSASFATIAEANADEGVK.N<br>K.VPITITSLGAR.E<br>R.IAIDPADIPEGAETVDAR.G<br>R.LGLSSAPAIEMAIAR.D<br>R.DLSLVEETGAPVHFR.Q<br>K.GGKPDVWVPLAANTK.G<br>R.LPFAEALPGMAGAEITLAMGLNLRV.D<br>R.AALMPDNGPLDGVGLVER.A<br>R.LAGLTIINAFENSTR.T                                                                                                                                                                                                                                                                                                                                                                                                                                                                                                                                                                                                                                                                                                                                                                                                                                                                                                                                                                             |
| YP_615921 | Sala_0870 | short-chain dehydrogenase/reductase SDR                  | 23.28%            | 3                       | R.AYAVGLANAGASVVADLNKEGAER.V<br>K.IVNLQISAGAFPAQTPIYGISK.V<br>R.LNAGGVYNNGGQINPHPTFGGIGISGFGK.E<br>K.QTVQADIPLAGAK.E<br>K.AGIDFLHYK.T<br>R.ASAEALAQSGVK.V<br>.MKLDNSIAAVTGGASGLGR.A<br>K.VDITSEDSVAGYEAAAR.A<br>K.VAIFDVNEEGR.A<br>R.VNSIMPGFATPPMLAVK.D<br>R.APAIFEGLAASVPPFK.R<br>R.NSYFNGQNL.R.L<br>K.DRAPAIFEGLAASVPPFK.R<br>K.VDAAFQDSGPNQGSR.T<br>R.VYGEIEEGSR.L<br>R.KEGEYLITGR.D<br>K.YNDEAWDPVFAK.A<br>R.APSQIIDDQVWASFQHDR.G<br>R.VVDFLEGLDVSEAVR.R<br>K.GFTAAMLPATTGNLKP.Y<br>R.FAVNVLQIQGQPTSNR.F<br>R.LLDLDFSEAVVERLAGAPR.A<br>R.GGSELVPSDDAAAFVATFPDGLAEVEDR.A<br>K.TGEDFVYVYVVDLDGAPGR.L<br>R.LLPGDQIQITTPDTEPFVQAAE.E<br>K.VAVEVTPQEDVWLPNFR.K<br>R.WTARVASASGAPSQLEGVV.V<br>R.VASSASGAPSQLEGVV.V<br>R.IGALYENDGYR.A<br>R.YSTAEQALPLILLNSDAAR.F<br>K.VAGDAVLSAFK.A<br>R.TSLLLDIAADAASDRPALGSGEEAIDFGTYR.A<br>R.IAFASGDPAIR.R<br>R.ASCEGSTVTVR.G<br>K.VSNFIANDTTQPLFLDPSQGAATAAR.Q<br>K.GVYDTSQYGTDTVPEISGIIK.T<br>R.VGAGGSQASAGNPALLPYK.S<br>R.SDFGNLAAEGVAGVEVYK.S<br>R.FANIEENRPGPTDIYQVQNAAYDFYDFQR.E<br>R.ASLEQAQNIKR.N<br>K.DLAITGAVGSNR.N<br>R.LVGYHLINETK.L<br>R.ASGAFFSALDRYDLLEPFALDVPR.A<br>R.LLGSIEGDVLTPEPNFIGYR.T<br>R.TVASLPAHGAYIAR.Y<br>R.SADEVSTSSASSAPAFDPQPHLILNLAIGGR.L<br>R.AGSSSPTAKVTREYSSARITRGA.A<br>R.IAFIAGSEYPLSQWR.V<br>R.ELGIEIPSQLSLVDFNTPIVR.F<br>R.EELNQAHVHGGITLHDVIDDR.F<br>K.GADGLIPVAAGAGGHAGR.Q<br>R.AADIVSNLFTGVHGNLRL.Q<br>R.EWFDQVWVPLSAGIGHGR.S<br>K.AGIVGSFPALNAR.P<br>R.PQSLDEWLHR.I<br>R.LPVIGSPLFVSGPDLVIAQCK.A<br>K.SNDRLEADIACTAK.W<br>K.DIWSSGGIGAGVSNRPAEVAELETQYLAAR.R<br>R.SILAAQACGADLAYSASFATIAEANADEGVKNGIVEGR.A<br>R.SILAAQACGADLAYSASFATIAEANADEGVK.N<br>K.VPITITSLGAR.E<br>R.IAIDPADIPEGAETVDAR.G<br>R.LGLSSAPAIEMAIAR.D<br>R.DLSLVEETGAPVHFR.Q<br>K.GGKPDVWVPLAANTK.G<br>R.LPFAEALPGMAGAEITLAMGLNLRV.D<br>R.AALMPDNGPLDGVGLVER.A<br>R.LAGLTIINAFENSTR.T                                                                                                                                                                                                                                                                                                                                                                                                                                                                                                                                                                                                                                                                                                                                                                                                                                                                                                                                                                                                                                                                                                                                                                                                                                                                                                                                                                                                                                                                                                                                                                                                                                                       |
| YP_615936 | Sala_0885 | hypothetical protein                                     | 7.99%             | 2                       | R.VVDFLEGLDVSEAVR.R                                                                                                                                                                                                                                                                                                                                                                                                                                                                                                                                                                                                                                                                                                                                                                                                                                                                                                                                                                                                                                                                                                                                                                                                                                                                                                                                                                                                                                                                                                                                                                                                                                                                                                                                                                                                                                                                                                                                                                                                                                                                                                                                                                                                                                                                                                                                                                                                                                                                                                                                                                                                                                                                                                                                                                                                                                                                                                                                                                                                                                                                                                                                                                                                                                                                                                                                                                                                                                                                      |
| YP_615939 | Sala_0888 | amidohydrolase 2                                         | 19.89%            | 5                       | R.VVDFLEGLDVSEAVR.R<br>K.GFTAAMLPATTGNLKP.Y<br>R.FAVNVLQIQGQPTSNR.F<br>R.LLDLDFSEAVVERLAGAPR.A<br>R.GGSELVPSDDAAAFVATFPDGLAEVEDR.A<br>K.TGEDFVYVYVVDLDGAPGR.L<br>R.LLPGDQIQITTPDTEPFVQAAE.E<br>K.VAVEVTPQEDVWLPNFR.K<br>R.WTARVASASGAPSQLEGVV.V<br>R.VASSASGAPSQLEGVV.V<br>R.IGALYENDGYR.A<br>R.YSTAEQALPLILLNSDAAR.F<br>K.VAGDAVLSAFK.A<br>R.TSLLLDIAADAASDRPALGSGEEAIDFGTYR.A<br>R.IAFASGDPAIR.R<br>R.ASCEGSTVTVR.G<br>K.VSNFIANDTTQPLFLDPSQGAATAAR.Q<br>K.GVYDTSQYGTDTVPEISGIIK.T<br>R.VGAGGSQASAGNPALLPYK.S<br>R.SDFGNLAAEGVAGVEVYK.S<br>R.FANIEENRPGPTDIYQVQNAAYDFYDFQR.E<br>R.ASLEQAQNIKR.N<br>K.DLAITGAVGSNR.N<br>R.LVGYHLINETK.L<br>R.ASGAFFSALDRYDLLEPFALDVPR.A<br>R.LLGSIEGDVLTPEPNFIGYR.T<br>R.TVASLPAHGAYIAR.Y<br>R.SADEVSTSSASSAPAFDPQPHLILNLAIGGR.L<br>R.AGSSSPTAKVTREYSSARITRGA.A<br>R.IAFIAGSEYPLSQWR.V<br>R.ELGIEIPSQLSLVDFNTPIVR.F<br>R.EELNQAHVHGGITLHDVIDDR.F<br>K.GADGLIPVAAGAGGHAGR.Q<br>R.AADIVSNLFTGVHGNLRL.Q<br>R.EWFDQVWVPLSAGIGHGR.S<br>K.AGIVGSFPALNAR.P<br>R.PQSLDEWLHR.I<br>R.LPVIGSPLFVSGPDLVIAQCK.A<br>K.SNDRLEADIACTAK.W<br>K.DIWSSGGIGAGVSNRPAEVAELETQYLAAR.R<br>R.SILAAQACGADLAYSASFATIAEANADEGVKNGIVEGR.A<br>R.SILAAQACGADLAYSASFATIAEANADEGVK.N<br>K.VPITITSLGAR.E<br>R.IAIDPADIPEGAETVDAR.G<br>R.LGLSSAPAIEMAIAR.D<br>R.DLSLVEETGAPVHFR.Q<br>K.GGKPDVWVPLAANTK.G<br>R.LPFAEALPGMAGAEITLAMGLNLRV.D<br>R.AALMPDNGPLDGVGLVER.A<br>R.LAGLTIINAFENSTR.T                                                                                                                                                                                                                                                                                                                                                                                                                                                                                                                                                                                                                                                                                                                                                                                                                                                                                                                                                                                                                                                                                                                                                                                                                                                                                                                                                                                                                                                                                                                                                                                                                                                                                                                                                                                                                                                                                                                                                                                                                                                                                                 |
| YP_615941 | Sala_0890 | flavin reductase-like, FMN-binding                       | 15.93%            | 3                       | R.VVDFLEGLDVSEAVR.R                                                                                                                                                                                                                                                                                                                                                                                                                                                                                                                                                                                                                                                                                                                                                                                                                                                                                                                                                                                                                                                                                                                                                                                                                                                                                                                                                                                                                                                                                                                                                                                                                                                                                                                                                                                                                                                                                                                                                                                                                                                                                                                                                                                                                                                                                                                                                                                                                                                                                                                                                                                                                                                                                                                                                                                                                                                                                                                                                                                                                                                                                                                                                                                                                                                                                                                                                                                                                                                                      |
| YP_615943 | Sala_0892 | protein of unknown function DUF35                        | 43.66%            | 3                       | R.VVDFLEGLDVSEAVR.R                                                                                                                                                                                                                                                                                                                                                                                                                                                                                                                                                                                                                                                                                                                                                                                                                                                                                                                                                                                                                                                                                                                                                                                                                                                                                                                                                                                                                                                                                                                                                                                                                                                                                                                                                                                                                                                                                                                                                                                                                                                                                                                                                                                                                                                                                                                                                                                                                                                                                                                                                                                                                                                                                                                                                                                                                                                                                                                                                                                                                                                                                                                                                                                                                                                                                                                                                                                                                                                                      |
| YP_615944 | Sala_0893 | acyl-CoA transferases/carnitine dehydratase-like protein | 4.43%             | 3                       | R.VVDFLEGLDVSEAVR.R                                                                                                                                                                                                                                                                                                                                                                                                                                                                                                                                                                                                                                                                                                                                                                                                                                                                                                                                                                                                                                                                                                                                                                                                                                                                                                                                                                                                                                                                                                                                                                                                                                                                                                                                                                                                                                                                                                                                                                                                                                                                                                                                                                                                                                                                                                                                                                                                                                                                                                                                                                                                                                                                                                                                                                                                                                                                                                                                                                                                                                                                                                                                                                                                                                                                                                                                                                                                                                                                      |
| YP_615946 | Sala_0895 | 3-alpha-hydroxysteroid dehydrogenase                     | 11.68%            | 2                       | R.VVDFLEGLDVSEAVR.R                                                                                                                                                                                                                                                                                                                                                                                                                                                                                                                                                                                                                                                                                                                                                                                                                                                                                                                                                                                                                                                                                                                                                                                                                                                                                                                                                                                                                                                                                                                                                                                                                                                                                                                                                                                                                                                                                                                                                                                                                                                                                                                                                                                                                                                                                                                                                                                                                                                                                                                                                                                                                                                                                                                                                                                                                                                                                                                                                                                                                                                                                                                                                                                                                                                                                                                                                                                                                                                                      |
| YP_615961 | Sala_0910 | AMP-dependent synthetase and ligase                      | 8.38%             | 2                       | R.VVDFLEGLDVSEAVR.R                                                                                                                                                                                                                                                                                                                                                                                                                                                                                                                                                                                                                                                                                                                                                                                                                                                                                                                                                                                                                                                                                                                                                                                                                                                                                                                                                                                                                                                                                                                                                                                                                                                                                                                                                                                                                                                                                                                                                                                                                                                                                                                                                                                                                                                                                                                                                                                                                                                                                                                                                                                                                                                                                                                                                                                                                                                                                                                                                                                                                                                                                                                                                                                                                                                                                                                                                                                                                                                                      |
| YP_615965 | Sala_0914 | TonB-dependent receptor                                  | 15.60%            | 8                       | R.VVDFLEGLDVSEAVR.R                                                                                                                                                                                                                                                                                                                                                                                                                                                                                                                                                                                                                                                                                                                                                                                                                                                                                                                                                                                                                                                                                                                                                                                                                                                                                                                                                                                                                                                                                                                                                                                                                                                                                                                                                                                                                                                                                                                                                                                                                                                                                                                                                                                                                                                                                                                                                                                                                                                                                                                                                                                                                                                                                                                                                                                                                                                                                                                                                                                                                                                                                                                                                                                                                                                                                                                                                                                                                                                                      |
| YP_615967 | Sala_0916 | SapC                                                     | 14.71%            | 2                       | R.VVDFLEGLDVSEAVR.R                                                                                                                                                                                                                                                                                                                                                                                                                                                                                                                                                                                                                                                                                                                                                                                                                                                                                                                                                                                                                                                                                                                                                                                                                                                                                                                                                                                                                                                                                                                                                                                                                                                                                                                                                                                                                                                                                                                                                                                                                                                                                                                                                                                                                                                                                                                                                                                                                                                                                                                                                                                                                                                                                                                                                                                                                                                                                                                                                                                                                                                                                                                                                                                                                                                                                                                                                                                                                                                                      |
| YP_615969 | Sala_0918 | tryptophan halogenase                                    | 6.56%             | 2                       | R.VVDFLEGLDVSEAVR.R                                                                                                                                                                                                                                                                                                                                                                                                                                                                                                                                                                                                                                                                                                                                                                                                                                                                                                                                                                                                                                                                                                                                                                                                                                                                                                                                                                                                                                                                                                                                                                                                                                                                                                                                                                                                                                                                                                                                                                                                                                                                                                                                                                                                                                                                                                                                                                                                                                                                                                                                                                                                                                                                                                                                                                                                                                                                                                                                                                                                                                                                                                                                                                                                                                                                                                                                                                                                                                                                      |
| YP_615970 | Sala_0919 | Glucan endo-1,3-beta-D-glucosidase                       | 17.78%            | 2                       | R.VVDFLEGLDVSEAVR.R                                                                                                                                                                                                                                                                                                                                                                                                                                                                                                                                                                                                                                                                                                                                                                                                                                                                                                                                                                                                                                                                                                                                                                                                                                                                                                                                                                                                                                                                                                                                                                                                                                                                                                                                                                                                                                                                                                                                                                                                                                                                                                                                                                                                                                                                                                                                                                                                                                                                                                                                                                                                                                                                                                                                                                                                                                                                                                                                                                                                                                                                                                                                                                                                                                                                                                                                                                                                                                                                      |
| YP_615971 | Sala_0920 | transcriptional regulator, LacI family                   | 10.83%            | 2                       | R.VVDFLEGLDVSEAVR.R                                                                                                                                                                                                                                                                                                                                                                                                                                                                                                                                                                                                                                                                                                                                                                                                                                                                                                                                                                                                                                                                                                                                                                                                                                                                                                                                                                                                                                                                                                                                                                                                                                                                                                                                                                                                                                                                                                                                                                                                                                                                                                                                                                                                                                                                                                                                                                                                                                                                                                                                                                                                                                                                                                                                                                                                                                                                                                                                                                                                                                                                                                                                                                                                                                                                                                                                                                                                                                                                      |
| YP_615973 | Sala_0922 | 2-nitropropane dioxygenase, NPD                          | 67.80%            | 12                      | R.VVDFLEGLDVSEAVR.R                                                                                                                                                                                                                                                                                                                                                                                                                                                                                                                                                                                                                                                                                                                                                                                                                                                                                                                                                                                                                                                                                                                                                                                                                                                                                                                                                                                                                                                                                                                                                                                                                                                                                                                                                                                                                                                                                                                                                                                                                                                                                                                                                                                                                                                                                                                                                                                                                                                                                                                                                                                                                                                                                                                                                                                                                                                                                                                                                                                                                                                                                                                                                                                                                                                                                                                                                                                                                                                                      |
| YP_615974 | Sala_0923 | amidohydrolase                                           | 27.03%            | 6                       | R.VVDFLEGLDVSEAVR.R                                                                                                                                                                                                                                                                                                                                                                                                                                                                                                                                                                                                                                                                                                                                                                                                                                                                                                                                                                                                                                                                                                                                                                                                                                                                                                                                                                                                                                                                                                                                                                                                                                                                                                                                                                                                                                                                                                                                                                                                                                                                                                                                                                                                                                                                                                                                                                                                                                                                                                                                                                                                                                                                                                                                                                                                                                                                                                                                                                                                                                                                                                                                                                                                                                                                                                                                                                                                                                                                      |
| YP_615975 | Sala_0924 | aspartate carbamoyltransferase                           | 23.26%            | 6                       | R.VVDFLEGLDVSEAVR.R                                                                                                                                                                                                                                                                                                                                                                                                                                                                                                                                                                                                                                                                                                                                                                                                                                                                                                                                                                                                                                                                                                                                                                                                                                                                                                                                                                                                                                                                                                                                                                                                                                                                                                                                                                                                                                                                                                                                                                                                                                                                                                                                                                                                                                                                                                                                                                                                                                                                                                                                                                                                                                                                                                                                                                                                                                                                                                                                                                                                                                                                                                                                                                                                                                                                                                                                                                                                                                                                      |

| Accession | Locus tag | Description                                                  | Sequence coverage | No. peptides identified | List of peptides identified                                                                                                                                                                                                                                                                                                                                                                                                                                                                                                                                                                                                                                                                                                                                                                                                                                                                                                                                                                                                                                                                                                                                                                                                                                                                                                                                                                                                                                                                                                                                                                                                                                                                                                                                                                                                                                                                                                                                                                                                                                                                                                                                                                                                                                                                                                                                                                                                                                                                                                                                                                                                                                                                                                                                                                                                              |
|-----------|-----------|--------------------------------------------------------------|-------------------|-------------------------|------------------------------------------------------------------------------------------------------------------------------------------------------------------------------------------------------------------------------------------------------------------------------------------------------------------------------------------------------------------------------------------------------------------------------------------------------------------------------------------------------------------------------------------------------------------------------------------------------------------------------------------------------------------------------------------------------------------------------------------------------------------------------------------------------------------------------------------------------------------------------------------------------------------------------------------------------------------------------------------------------------------------------------------------------------------------------------------------------------------------------------------------------------------------------------------------------------------------------------------------------------------------------------------------------------------------------------------------------------------------------------------------------------------------------------------------------------------------------------------------------------------------------------------------------------------------------------------------------------------------------------------------------------------------------------------------------------------------------------------------------------------------------------------------------------------------------------------------------------------------------------------------------------------------------------------------------------------------------------------------------------------------------------------------------------------------------------------------------------------------------------------------------------------------------------------------------------------------------------------------------------------------------------------------------------------------------------------------------------------------------------------------------------------------------------------------------------------------------------------------------------------------------------------------------------------------------------------------------------------------------------------------------------------------------------------------------------------------------------------------------------------------------------------------------------------------------------------|
| YP_615977 | Sala_0926 | excinuclease ABC, A subunit                                  | 54.60%            | 35                      | R.SNILALTLGNEVR.V<br>R.GVEIDSSVADHAR.S<br>R.LGADVNMHAAQSSVK.K<br>K.HDDRLAGLTINAFFENSTR.T<br>K.KGETLIDTAMTLNAMR.A<br>K.VGQQTLLSGGEAR.V<br>R.TSGTSLGGESQR.I<br>R.LGFLNNVGLDYLNLR.T<br>R.ANNLQNVTR.I<br>R.SVADALQWFSTLEEK.L<br>K.LLEVQLALVDQNSVVIEHNLVVIK.T<br>K.GGEIVAAAGTPEQVVK.E<br>K.AFEVIGNLR.R<br>K.LADGLAYVDLADGVVPGREEDGGAAEQK.M<br>R.LASQIGSGLSGLVYLDEPSIGLHQR.D<br>K.SSLIDTVASAAAR.V<br>R.YVESLSAVAR.Q<br>R.SNPATYGAFTVIR.D<br>R.DWFAGLPEAQR.G<br>K.TADYLLDGLGPEGVK.G<br>K.SSLAFDTIYAEQQR.R<br>R.SVADALQWFSTLEEKLNQQR.Q<br>R.LEFDPELVVPHALS.LK<br>R.HADYVDMGPGAGVHGVEIVAQGTLLDLLK.N<br>K.SNPPSPYYMQVLESIGK.A<br>R.VGIPSPATGEPISAQTVSQMVDR.V<br>K.SLTAAYLTGAK.K<br>R.STVATVTEIYDHR.L<br>R.QFLEMQKQVDEHIDGLSPAISIEQK.T<br>R.LRDLGNTVIVVEHDEDAIR.H<br>R.DALVITGLSGSGK.S<br>K.YKHDIEVVDR.I<br>K.IAGENISMSAQR.S<br>K.GMSIADVDMTVEDAAEFFK.A<br>R.LRPEPLAVK.I<br>R.LADSFETALK.L<br>R.IPLGFTFCVGLSGSGK.S<br>R.DLNGTVVVEHDEDAIR.H<br>R.AYLLAPVVR.G<br>K.GVVDPLR.D<br>R.YAVAAFEVAADVYLLKVPSPDR.L<br>R.IQLLAGQQDGLSLVGTASGASALR.M<br>R.LDNPPAIVVTFADR.Y<br>R.TLVVDEPLAIER.L<br>R.SSLAVDPEQLVSLDEEIALQR.L<br>K.SEATEMIMNLSFLR.S<br>K.LAQPIQAVR.D<br>K.GNVVDPIGLIDQYGADALR.F<br>R.GLGEGEAVPAPADGPLSPALSPEGEREIAETR.A<br>K.SKGNVVDPIGLIDQYGADALR.F<br>R.GGVVIEPWLDQWYVDAEK.L<br>R.RVPVVADEHADPELGGAVK.I<br>R.IPAVVAEDGR.T<br>R.LNNPSFVER.A<br>R.DAAASADIDWLIK.L<br>R.VPVVADEHADPELGGAVK.I<br>K.TAISDLEVEHEVQGGFWHFY.Y<br>K.ITPGHDFNDFEVGKR.A<br>K.FVELPITGR.R<br>R.FDDAANATVSAWDR.F<br>R.TLYHLGLVR.A<br>R.ADKLAAQLDR.L<br>R.LTAHFPAASK.D<br>R.GLGEGEAVPAPADGPLSPALSPEGEREIAETR.A<br>R.EQVIMDPHFTR.A<br>K.TDPAIEAK.W<br>K.LDDGHDHIVATTRPETMLADMVAVHPDDAR.Y<br>K.ETGLIPIHTKDKGNAHDAEPR.T<br>K.AELGLPPGAR.L<br>R.WIIGEVADTVAAVEAAFAAYR.F<br>R.DEFVVKVWEWK.A<br>R.AGFKRAEMLNMFDDGANVITADGLPAEYGLLHR.F<br>R.ADYPLITAK.W<br>R.TDFTRDEFVVKVWEWK.A<br>R.TDFTRDEFVVKV<br>R.LVNWDPK.L<br>R.LTAHFPAASK.D<br>K.ATSGGQTR.Q<br>K.ASPETLEGNIGDVTPLPGGALLYSR.N<br>R.IPYSQGLAAFTALQR.R<br>K.LPVAVIHHGGPQSGFNSWSTR.W<br>R.AADAGLVGDTSPKPFGGEEELAWGTDSR.T<br>R.STGLWLVDR.H<br>R.TVFWLDSYLLK.K<br>R.LAEFDPVKLEK.I<br>K.GDTVWGMILKPAK.A<br>K.VGGAAMQVTR.A<br>K.SLVVTAQDVLHPVFR.V<br>R.SVGSIAWAPDGK.S<br>R.PFIFNLEGSK.A<br>K.NETSPAFKDGILYFLSNASGK.S<br>R.HWDEWETPGTYSRPFIFNLEGGK.A<br>R.HWDEWETPGTYSR.P<br>R.SEPEKWNPNVHAK.W<br>R.GVPSQLLVFPDENHVVVK.G<br>K.GAKPIADTAGK.N<br>K.ATEKLPVATVHHGGPQSGFNSWSTR.W<br>R.TVFNWLDYLLK.K<br>K.WLAYAAMAR.P<br>R.VAAPASPDR.W<br>R.RGVPSQLLVFPDENHVVVK.G<br>R.HMFPVNLNANQATDTLPAPSPDGK.W<br>K.LKASPETLEGNIGDVTPLPGGALLYSR.N<br>K.LLAWGDIPK.E<br>K.DKGALVPGSGR.L<br>R.KLTDAWDR.S<br>R.WVVFQMTETEAGSYKR.S<br>R.VDVTIGRVEK.L<br>R.LYKDGIVGVR.H<br>K.ADRNEMSTNLDIYSWLVDNR.M<br>R.WVVFQMTETEAGSYK.R<br>R.PGYEADRLVLR.N<br>R.PGYEADR.L<br>R.NLESGETR.K<br>R.NEMSTNLDIYSWLVDNR.M<br>K.VGGAAMQVTR.A<br>K.TPMLVITSEKDFR.I<br>K.TPMLVITSEK.D |
| YP_615981 | Sala_0930 | response regulator receiver protein                          | 30.86%            | 4                       | R.VAVAAFEVAADVYLLKVPSPDR.L<br>R.IQLLAGQQDGLSLVGTASGASALR.M<br>R.LDNPPAIVVTFADR.Y<br>R.TLVVDEPLAIER.L<br>R.SSLAVDPEQLVSLDEEIALQR.L<br>K.SEATEMIMNLSFLR.S<br>K.LAQPIQAVR.D<br>K.GNVVDPIGLIDQYGADALR.F<br>R.GLGEGEAVPAPADGPLSPALSPEGEREIAETR.A<br>K.SKGNVVDPIGLIDQYGADALR.F<br>R.GGVVIEPWLDQWYVDAEK.L<br>R.RVPVVADEHADPELGGAVK.I<br>R.IPAVVAEDGR.T<br>R.LNNPSFVER.A<br>R.DAAASADIDWLIK.L<br>R.VPVVADEHADPELGGAVK.I<br>K.TAISDLEVEHEVQGGFWHFY.Y<br>K.ITPGHDFNDFEVGKR.A<br>K.FVELPITGR.R<br>R.FDDAANATVSAWDR.F<br>R.TLYHLGLVR.A<br>R.ADKLAAQLDR.L<br>R.LTAHFPAASK.D<br>R.GLGEGEAVPAPADGPLSPALSPEGEREIAETR.A<br>R.EQVIMDPHFTR.A<br>K.TDPAIEAK.W<br>K.LDDGHDHIVATTRPETMLADMVAVHPDDAR.Y<br>K.ETGLIPIHTKDKGNAHDAEPR.T<br>K.AELGLPPGAR.L<br>R.WIIGEVADTVAAVEAAFAAYR.F<br>R.DEFVVKVWEWK.A<br>R.AGFKRAEMLNMFDDGANVITADGLPAEYGLLHR.F<br>R.ADYPLITAK.W<br>R.TDFTRDEFVVKVWEWK.A<br>R.TDFTRDEFVVKV<br>R.LVNWDPK.L<br>R.LTAHFPAASK.D<br>K.ATSGGQTR.Q<br>K.ASPETLEGNIGDVTPLPGGALLYSR.N<br>R.IPYSQGLAAFTALQR.R<br>K.LPVAVIHHGGPQSGFNSWSTR.W<br>R.AADAGLVGDTSPKPFGGEEELAWGTDSR.T<br>R.STGLWLVDR.H<br>R.TVFWLDSYLLK.K<br>R.LAEFDPVKLEK.I<br>K.GDTVWGMILKPAK.A<br>K.VGGAAMQVTR.A<br>K.SLVVTAQDVLHPVFR.V<br>R.SVGSIAWAPDGK.S<br>R.PFIFNLEGSK.A<br>K.NETSPAFKDGILYFLSNASGK.S<br>R.HWDEWETPGTYSRPFIFNLEGGK.A<br>R.HWDEWETPGTYSR.P<br>R.SEPEKWNPNVHAK.W<br>R.GVPSQLLVFPDENHVVVK.G<br>K.GAKPIADTAGK.N<br>K.ATEKLPVATVHHGGPQSGFNSWSTR.W<br>R.TVFNWLDYLLK.K<br>K.WLAYAAMAR.P<br>R.VAAPASPDR.W<br>R.RGVPSQLLVFPDENHVVVK.G<br>R.HMFPVNLNANQATDTLPAPSPDGK.W<br>K.LKASPETLEGNIGDVTPLPGGALLYSR.N<br>K.LLAWGDIPK.E<br>K.DKGALVPGSGR.L<br>R.KLTDAWDR.S<br>R.WVVFQMTETEAGSYKR.S<br>R.VDVTIGRVEK.L<br>R.LYKDGIVGVR.H<br>K.ADRNEMSTNLDIYSWLVDNR.M<br>R.WVVFQMTETEAGSYK.R<br>R.PGYEADRLVLR.N<br>R.PGYEADR.L<br>R.NLESGETR.K<br>R.NEMSTNLDIYSWLVDNR.M<br>K.VGGAAMQVTR.A<br>K.TPMLVITSEKDFR.I<br>K.TPMLVITSEK.D                                                                                                                                                                                                                                                                                                                                                                                                                                                                                                                                                                                                                                                                                                                                                                                                                                                                                                                                                                    |
| YP_615982 | Sala_0931 | signal transduction histidine kinase, LytS                   | 9.23%             | 2                       | R.SSLAVDPEQLVSLDEEIALQR.L<br>K.SEATEMIMNLSFLR.S<br>K.LAQPIQAVR.D<br>K.GNVVDPIGLIDQYGADALR.F<br>R.GLGEGEAVPAPADGPLSPALSPEGEREIAETR.A<br>K.SKGNVVDPIGLIDQYGADALR.F<br>R.GGVVIEPWLDQWYVDAEK.L<br>R.RVPVVADEHADPELGGAVK.I<br>R.IPAVVAEDGR.T<br>R.LNNPSFVER.A<br>R.DAAASADIDWLIK.L<br>R.VPVVADEHADPELGGAVK.I<br>K.TAISDLEVEHEVQGGFWHFY.Y<br>K.ITPGHDFNDFEVGKR.A<br>K.FVELPITGR.R<br>R.FDDAANATVSAWDR.F<br>R.TLYHLGLVR.A<br>R.ADKLAAQLDR.L<br>R.LTAHFPAASK.D<br>R.GLGEGEAVPAPADGPLSPALSPEGEREIAETR.A<br>R.EQVIMDPHFTR.A<br>K.TDPAIEAK.W<br>K.LDDGHDHIVATTRPETMLADMVAVHPDDAR.Y<br>K.ETGLIPIHTKDKGNAHDAEPR.T<br>K.AELGLPPGAR.L<br>R.WIIGEVADTVAAVEAAFAAYR.F<br>R.DEFVVKVWEWK.A<br>R.AGFKRAEMLNMFDDGANVITADGLPAEYGLLHR.F<br>R.ADYPLITAK.W<br>R.TDFTRDEFVVKVWEWK.A<br>R.TDFTRDEFVVKV<br>R.LVNWDPK.L<br>R.LTAHFPAASK.D<br>K.ATSGGQTR.Q<br>K.ASPETLEGNIGDVTPLPGGALLYSR.N<br>R.IPYSQGLAAFTALQR.R<br>K.LPVAVIHHGGPQSGFNSWSTR.W<br>R.AADAGLVGDTSPKPFGGEEELAWGTDSR.T<br>R.STGLWLVDR.H<br>R.TVFWLDSYLLK.K<br>R.LAEFDPVKLEK.I<br>K.GDTVWGMILKPAK.A<br>K.VGGAAMQVTR.A<br>K.SLVVTAQDVLHPVFR.V<br>R.SVGSIAWAPDGK.S<br>R.PFIFNLEGSK.A<br>K.NETSPAFKDGILYFLSNASGK.S<br>R.HWDEWETPGTYSRPFIFNLEGGK.A<br>R.HWDEWETPGTYSR.P<br>R.SEPEKWNPNVHAK.W<br>R.GVPSQLLVFPDENHVVVK.G<br>K.GAKPIADTAGK.N<br>K.ATEKLPVATVHHGGPQSGFNSWSTR.W<br>R.TVFNWLDYLLK.K<br>K.WLAYAAMAR.P<br>R.VAAPASPDR.W<br>R.RGVPSQLLVFPDENHVVVK.G<br>R.HMFPVNLNANQATDTLPAPSPDGK.W<br>K.LKASPETLEGNIGDVTPLPGGALLYSR.N<br>K.LLAWGDIPK.E<br>K.DKGALVPGSGR.L<br>R.KLTDAWDR.S<br>R.WVVFQMTETEAGSYKR.S<br>R.VDVTIGRVEK.L<br>R.LYKDGIVGVR.H<br>K.ADRNEMSTNLDIYSWLVDNR.M<br>R.WVVFQMTETEAGSYK.R<br>R.PGYEADRLVLR.N<br>R.PGYEADR.L<br>R.NLESGETR.K<br>R.NEMSTNLDIYSWLVDNR.M<br>K.VGGAAMQVTR.A<br>K.TPMLVITSEKDFR.I<br>K.TPMLVITSEK.D                                                                                                                                                                                                                                                                                                                                                                                                                                                                                                                                                                                                                                                                                                                                                                                                                                                                                                                                                                                                                                                                            |
| YP_615983 | Sala_0932 | valyl-tRNA synthetase                                        | 43.72%            | 32                      | R.SSLAVDPEQLVSLDEEIALQR.L<br>K.SEATEMIMNLSFLR.S<br>K.LAQPIQAVR.D<br>K.GNVVDPIGLIDQYGADALR.F<br>R.GLGEGEAVPAPADGPLSPALSPEGEREIAETR.A<br>K.SKGNVVDPIGLIDQYGADALR.F<br>R.GGVVIEPWLDQWYVDAEK.L<br>R.RVPVVADEHADPELGGAVK.I<br>R.IPAVVAEDGR.T<br>R.LNNPSFVER.A<br>R.DAAASADIDWLIK.L<br>R.VPVVADEHADPELGGAVK.I<br>K.TAISDLEVEHEVQGGFWHFY.Y<br>K.ITPGHDFNDFEVGKR.A<br>K.FVELPITGR.R<br>R.FDDAANATVSAWDR.F<br>R.TLYHLGLVR.A<br>R.ADKLAAQLDR.L<br>R.LTAHFPAASK.D<br>R.GLGEGEAVPAPADGPLSPALSPEGEREIAETR.A<br>R.EQVIMDPHFTR.A<br>K.TDPAIEAK.W<br>K.LDDGHDHIVATTRPETMLADMVAVHPDDAR.Y<br>K.ETGLIPIHTKDKGNAHDAEPR.T<br>K.AELGLPPGAR.L<br>R.WIIGEVADTVAAVEAAFAAYR.F<br>R.DEFVVKVWEWK.A<br>R.AGFKRAEMLNMFDDGANVITADGLPAEYGLLHR.F<br>R.ADYPLITAK.W<br>R.TDFTRDEFVVKVWEWK.A<br>R.TDFTRDEFVVKV<br>R.LVNWDPK.L<br>R.LTAHFPAASK.D<br>K.ATSGGQTR.Q<br>K.ASPETLEGNIGDVTPLPGGALLYSR.N<br>R.IPYSQGLAAFTALQR.R<br>K.LPVAVIHHGGPQSGFNSWSTR.W<br>R.AADAGLVGDTSPKPFGGEEELAWGTDSR.T<br>R.STGLWLVDR.H<br>R.TVFWLDSYLLK.K<br>R.LAEFDPVKLEK.I<br>K.GDTVWGMILKPAK.A<br>K.VGGAAMQVTR.A<br>K.SLVVTAQDVLHPVFR.V<br>R.SVGSIAWAPDGK.S<br>R.PFIFNLEGSK.A<br>K.NETSPAFKDGILYFLSNASGK.S<br>R.HWDEWETPGTYSRPFIFNLEGGK.A<br>R.HWDEWETPGTYSR.P<br>R.SEPEKWNPNVHAK.W<br>R.GVPSQLLVFPDENHVVVK.G<br>K.GAKPIADTAGK.N<br>K.ATEKLPVATVHHGGPQSGFNSWSTR.W<br>R.TVFNWLDYLLK.K<br>K.WLAYAAMAR.P<br>R.VAAPASPDR.W<br>R.RGVPSQLLVFPDENHVVVK.G<br>R.HMFPVNLNANQATDTLPAPSPDGK.W<br>K.LKASPETLEGNIGDVTPLPGGALLYSR.N<br>K.LLAWGDIPK.E<br>K.DKGALVPGSGR.L<br>R.KLTDAWDR.S<br>R.WVVFQMTETEAGSYKR.S<br>R.VDVTIGRVEK.L<br>R.LYKDGIVGVR.H<br>K.ADRNEMSTNLDIYSWLVDNR.M<br>R.WVVFQMTETEAGSYK.R<br>R.PGYEADRLVLR.N<br>R.PGYEADR.L<br>R.NLESGETR.K<br>R.NEMSTNLDIYSWLVDNR.M<br>K.VGGAAMQVTR.A<br>K.TPMLVITSEKDFR.I<br>K.TPMLVITSEK.D                                                                                                                                                                                                                                                                                                                                                                                                                                                                                                                                                                                                                                                                                                                                                                                                                                                                                                                                                                                                                                                                            |
| YP_615984 | Sala_0933 | peptidase S9, prolyl oligopeptidase active site region       | 65.27%            | 40                      | R.SSLAVDPEQLVSLDEEIALQR.L<br>K.SEATEMIMNLSFLR.S<br>K.LAQPIQAVR.D<br>K.GNVVDPIGLIDQYGADALR.F<br>R.GLGEGEAVPAPADGPLSPALSPEGEREIAETR.A<br>K.SKGNVVDPIGLIDQYGADALR.F<br>R.GGVVIEPWLDQWYVDAEK.L<br>R.RVPVVADEHADPELGGAVK.I<br>R.IPAVVAEDGR.T<br>R.LNNPSFVER.A<br>R.DAAASADIDWLIK.L<br>R.VPVVADEHADPELGGAVK.I<br>K.TAISDLEVEHEVQGGFWHFY.Y<br>K.ITPGHDFNDFEVGKR.A<br>K.FVELPITGR.R<br>R.FDDAANATVSAWDR.F<br>R.TLYHLGLVR.A<br>R.ADKLAAQLDR.L<br>R.LTAHFPAASK.D<br>R.GLGEGEAVPAPADGPLSPALSPEGEREIAETR.A<br>R.EQVIMDPHFTR.A<br>K.TDPAIEAK.W<br>K.LDDGHDHIVATTRPETMLADMVAVHPDDAR.Y<br>K.ETGLIPIHTKDKGNAHDAEPR.T<br>K.AELGLPPGAR.L<br>R.WIIGEVADTVAAVEAAFAAYR.F<br>R.DEFVVKVWEWK.A<br>R.AGFKRAEMLNMFDDGANVITADGLPAEYGLLHR.F<br>R.ADYPLITAK.W<br>R.TDFTRDEFVVKVWEWK.A<br>R.TDFTRDEFVVKV<br>R.LVNWDPK.L<br>R.LTAHFPAASK.D<br>K.ATSGGQTR.Q<br>K.ASPETLEGNIGDVTPLPGGALLYSR.N<br>R.IPYSQGLAAFTALQR.R<br>K.LPVAVIHHGGPQSGFNSWSTR.W<br>R.AADAGLVGDTSPKPFGGEEELAWGTDSR.T<br>R.STGLWLVDR.H<br>R.TVFWLDSYLLK.K<br>R.LAEFDPVKLEK.I<br>K.GDTVWGMILKPAK.A<br>K.VGGAAMQVTR.A<br>K.SLVVTAQDVLHPVFR.V<br>R.SVGSIAWAPDGK.S<br>R.PFIFNLEGSK.A<br>K.NETSPAFKDGILYFLSNASGK.S<br>R.HWDEWETPGTYSRPFIFNLEGGK.A<br>R.HWDEWETPGTYSR.P<br>R.SEPEKWNPNVHAK.W<br>R.GVPSQLLVFPDENHVVVK.G<br>K.GAKPIADTAGK.N<br>K.ATEKLPVATVHHGGPQSGFNSWSTR.W<br>R.TVFNWLDYLLK.K<br>K.WLAYAAMAR.P<br>R.VAAPASPDR.W<br>R.RGVPSQLLVFPDENHVVVK.G<br>R.HMFPVNLNANQATDTLPAPSPDGK.W<br>K.LKASPETLEGNIGDVTPLPGGALLYSR.N<br>K.LLAWGDIPK.E<br>K.DKGALVPGSGR.L<br>R.KLTDAWDR.S<br>R.WVVFQMTETEAGSYKR.S<br>R.VDVTIGRVEK.L<br>R.LYKDGIVGVR.H<br>K.ADRNEMSTNLDIYSWLVDNR.M<br>R.WVVFQMTETEAGSYK.R<br>R.PGYEADRLVLR.N<br>R.PGYEADR.L<br>R.NLESGETR.K<br>R.NEMSTNLDIYSWLVDNR.M<br>K.VGGAAMQVTR.A<br>K.TPMLVITSEKDFR.I<br>K.TPMLVITSEK.D                                                                                                                                                                                                                                                                                                                                                                                                                                                                                                                                                                                                                                                                                                                                                                                                                                                                                                                                                                                                                                                                            |
| YP_615986 | Sala_0935 | amidohydrolase                                               | 13.55%            | 4                       | R.VTAHAHGAEGIK.T<br>R.MWVAGAYITIPK.G<br>R.LGVAVTSEEAERK.A<br>R.AGVDSIEHASVADEEALQLAK.K<br>R.SSQAEQNQLQVR.M<br>R.SAGQRPVPEPFTHTGSEQR.M<br>K.FGAAGDAAQYVVAHEVGHIIQITISGIANQVR.Q<br>R.QTPEAISPVDYAPLVELNLR.L<br>R.EFWEVGSASPLSPIDTDWAR.E<br>K.LPEDLAELPEVK.A<br>K.ALNVVQLIHEPPAWQTGAR.D<br>R.EQVINDVLLAGQPTK.Q<br>R.IIGTASAHSLVASPFK.S<br>K.QFVTEQVAALAAFLTR.D<br>K.AFAADGANLIINGFGDADAIEAERK.E<br>K.TALTOSTSGILGIAK.A<br>K.HGLAGLTK.T<br>R.DEAANITGANLSVDGGWATAA.<br>K.AFAADGANLIINGFGDADAIEAER.K                                                                                                                                                                                                                                                                                                                                                                                                                                                                                                                                                                                                                                                                                                                                                                                                                                                                                                                                                                                                                                                                                                                                                                                                                                                                                                                                                                                                                                                                                                                                                                                                                                                                                                                                                                                                                                                                                                                                                                                                                                                                                                                                                                                                                                                                                                                                          |
| YP_615987 | Sala_0936 | protein of unknown function, zinc metalloproteinase putative | 20.86%            | 3                       | R.VTAHAHGAEGIK.T<br>R.MWVAGAYITIPK.G<br>R.LGVAVTSEEAERK.A<br>R.AGVDSIEHASVADEEALQLAK.K<br>R.SSQAEQNQLQVR.M<br>R.SAGQRPVPEPFTHTGSEQR.M<br>K.FGAAGDAAQYVVAHEVGHIIQITISGIANQVR.Q<br>R.QTPEAISPVDYAPLVELNLR.L<br>R.EFWEVGSASPLSPIDTDWAR.E<br>K.LPEDLAELPEVK.A<br>K.ALNVVQLIHEPPAWQTGAR.D<br>R.EQVINDVLLAGQPTK.Q<br>R.IIGTASAHSLVASPFK.S<br>K.QFVTEQVAALAAFLTR.D<br>K.AFAADGANLIINGFGDADAIEAERK.E<br>K.TALTOSTSGILGIAK.A<br>K.HGLAGLTK.T<br>R.DEAANITGANLSVDGGWATAA.<br>K.AFAADGANLIINGFGDADAIEAER.K                                                                                                                                                                                                                                                                                                                                                                                                                                                                                                                                                                                                                                                                                                                                                                                                                                                                                                                                                                                                                                                                                                                                                                                                                                                                                                                                                                                                                                                                                                                                                                                                                                                                                                                                                                                                                                                                                                                                                                                                                                                                                                                                                                                                                                                                                                                                          |
| YP_615988 | Sala_0937 | Patatin                                                      | 18.96%            | 4                       | R.QTPEAISPVDYAPLVELNLR.L<br>R.EFWEVGSASPLSPIDTDWAR.E<br>K.LPEDLAELPEVK.A<br>K.ALNVVQLIHEPPAWQTGAR.D<br>R.EQVINDVLLAGQPTK.Q<br>R.IIGTASAHSLVASPFK.S<br>K.QFVTEQVAALAAFLTR.D<br>K.AFAADGANLIINGFGDADAIEAERK.E<br>K.TALTOSTSGILGIAK.A<br>K.HGLAGLTK.T<br>R.DEAANITGANLSVDGGWATAA.<br>K.AFAADGANLIINGFGDADAIEAER.K                                                                                                                                                                                                                                                                                                                                                                                                                                                                                                                                                                                                                                                                                                                                                                                                                                                                                                                                                                                                                                                                                                                                                                                                                                                                                                                                                                                                                                                                                                                                                                                                                                                                                                                                                                                                                                                                                                                                                                                                                                                                                                                                                                                                                                                                                                                                                                                                                                                                                                                           |
| YP_615989 | Sala_0938 | 3-hydroxybutyrate dehydrogenase                              | 56.32%            | 11                      | R.QTPEAISPVDYAPLVELNLR.L<br>R.EFWEVGSASPLSPIDTDWAR.E<br>K.LPEDLAELPEVK.A<br>K.ALNVVQLIHEPPAWQTGAR.D<br>R.EQVINDVLLAGQPTK.Q<br>R.IIGTASAHSLVASPFK.S<br>K.QFVTEQVAALAAFLTR.D<br>K.AFAADGANLIINGFGDADAIEAERK.E<br>K.TALTOSTSGILGIAK.A<br>K.HGLAGLTK.T<br>R.DEAANITGANLSVDGGWATAA.<br>K.AFAADGANLIINGFGDADAIEAER.K                                                                                                                                                                                                                                                                                                                                                                                                                                                                                                                                                                                                                                                                                                                                                                                                                                                                                                                                                                                                                                                                                                                                                                                                                                                                                                                                                                                                                                                                                                                                                                                                                                                                                                                                                                                                                                                                                                                                                                                                                                                                                                                                                                                                                                                                                                                                                                                                                                                                                                                           |

| Accession | Locus tag | Description                                                            | Sequence coverage | No. peptides identified | List of peptides identified                                                                                                                                                                                                                                                                                                                                                                                                                                                                                                                                                                                                                                                                                                                                                                                                                                                                                                                                                                                                                                                                                                                                                                                                                                                                                                                                                                                                                                                                                                                                                                                                                                                                                                                                                                                                                                                                                                                                                                                                                                                                                                                                                                                                                                                                                                                                                                                                                                                                                                                                                                                                                                                                                                                                                                                                                                                                                                                                                                                                                                                                                                                                                                                                                                         |
|-----------|-----------|------------------------------------------------------------------------|-------------------|-------------------------|---------------------------------------------------------------------------------------------------------------------------------------------------------------------------------------------------------------------------------------------------------------------------------------------------------------------------------------------------------------------------------------------------------------------------------------------------------------------------------------------------------------------------------------------------------------------------------------------------------------------------------------------------------------------------------------------------------------------------------------------------------------------------------------------------------------------------------------------------------------------------------------------------------------------------------------------------------------------------------------------------------------------------------------------------------------------------------------------------------------------------------------------------------------------------------------------------------------------------------------------------------------------------------------------------------------------------------------------------------------------------------------------------------------------------------------------------------------------------------------------------------------------------------------------------------------------------------------------------------------------------------------------------------------------------------------------------------------------------------------------------------------------------------------------------------------------------------------------------------------------------------------------------------------------------------------------------------------------------------------------------------------------------------------------------------------------------------------------------------------------------------------------------------------------------------------------------------------------------------------------------------------------------------------------------------------------------------------------------------------------------------------------------------------------------------------------------------------------------------------------------------------------------------------------------------------------------------------------------------------------------------------------------------------------------------------------------------------------------------------------------------------------------------------------------------------------------------------------------------------------------------------------------------------------------------------------------------------------------------------------------------------------------------------------------------------------------------------------------------------------------------------------------------------------------------------------------------------------------------------------------------------------|
| YP_615990 | Sala_0939 | hypothetical protein                                                   | 75.23%            | 12                      | K.AAYDGADLTKPDEIMAMFTR.A<br>K.ELEAISGGK.A<br>K.AFAADGANLLINGFGDADAIEARKELEAISGGK.A<br>R.IRDWYGSWQAALADAR.A<br>K.LTGSQRPVGLIFPDNLR.R<br>R.QIFLGTLELGDEK.M<br>R.AVVPAPPSAGDAEAGGTWR.A<br>R.ATATDADKQR.I<br>R.VTAEQGLSSLTK.L<br>R.LVLPAPAYESLLDVTELVAN.<br>R.DWYGSWQAALADAR.A<br>R.PVGLIFPDNLR.R<br>R.DGLGFAYGWFR.C<br>R.QIFLGTLELGDEKMAINYSR.M<br>K.GHGAIEDDEGALLQPMALPNAHLPGDYR.C<br>K.NHISDEAR.L<br>K.GVGGHGYPTTKDPIVLASR.I<br>R.IVQALQTLVSR.E<br>R.SAGLAAEAR.K<br>R.EISPLDSAVTVGSFHAGAK.H<br>K.VGGTGVAVMK.N<br>R.TPSSLHSFWAPDAPAVISTATEALTAMAMK.L<br>R.MPVTVQKDEYTPATNTPEFTEDMATFLK.T<br>K.SLIWVGGVQAEFDAK.K<br>R.SYTDVARDHLLDGIAR.I<br>R.ADMALPVTETGLPGASK.V<br>K.VPPVMGGEDFGR.F<br>R.KLGEVTEK.V<br>R.GEVQAQMPSLMAIYDDLHANPELSFMEVR.S<br>K.SLIWVGGVQAEFDAK.K<br>K.GVGGHGYPTTK.D<br>R.IAKGEAIAAGMPEDR.M<br>K.DKWSGTLVMIGQPAEER.G<br>K.NGPGFVMVR.A<br>K.GEAIAAGMPEDR.M<br>K.WSGTLVMIGQPAEER.G<br>R.MMLEDGLYTR.F<br>K.VGGTGVAVMK.N<br>K.DPIVLASR.I<br>R.FPKPEVLAFLDAQFPAGMIGYPAGYALANVDSVDILVK.G<br>R.DHLLDGLAR.I<br>K.DEYTPATNTPEFTEDMATFLK.T<br>R.DHDGAWDAISGESVAR.M<br>R.EYFGDEAMLGIVK.G<br>K.QVQAIDNHETHVPIIADIDAGFNAEATYLLAK.K<br>K.LMSAEYDSELSSEADNR.I<br>R.QQYDYSWAEGR.D<br>R.IREVVPNAK.L<br>K.TSVPALIEEITYFLR.Q<br>K.LAYNPSFNTLWFR.Q<br>R.AVLTEQGFAPSDYADR.G<br>R.AEVLPEVQSAQSEQR.L<br>R.NTEITAPVYVDANGVQR.L<br>R.LYSVAEAMDMVFLGL.F<br>R.KPGNVMFYVQAPVPK.G<br>K.FDMTIDEVR.A<br>R.SLDLGLPR.A<br>R.AVLTEQGFAPSDYADR.DPR.V<br>R.MPDGVDIETPSHLRPR.N<br>R.GFDPVSDPRA<br>K.GHPFSQVLEFQVLESQMR.L<br>R.LRAEIAAR.K<br>R.LFSALNAR.R<br>R.ASQPAAPEGL<br>K.ATPDEVPDSKFDAR.L<br>R.ECAVFAQDAAGQR.L<br>K.GYEADVDDRETFFEMDR.Q<br>K.FDMTIDEVR.A<br>R.LYSVAEAMDMVFLGL.F<br>R.KPGNVMFYVQAPVPK.G<br>R.KGHPFSQVLEFQVLESQMR.L<br>R.ADKSPGR.Q<br>K.GYEADVDDRETFFEMDR.Q<br>K.ATPDEVPDSK.F<br>R.PAPLANVAAPLAWLAR.N<br>R.AVAVALASEK.G<br>R.GQHQLAEHPR.R<br>R.DNHWGLADWHNR.L<br>R.NHPEVRTYVILHDPQTR.G<br>R.TTITTDHQVHIDADGR.I<br>R.IEQPNAPEMAIAPDAVQR.A<br>R.RLIYGETYQFADGGYHGK.V<br>R.GPVSFLFQGGISGILVNLVSK.S<br>R.VHGESQSTIQSGLTR.G<br>R.YIDSLEYFTHYNSYNPTDPPAADR.T<br>K.TFGLTGEAQLR.L<br>K.TDTALIELPQPVK.V<br>K.LLVGLDYSWNR.V<br>K.YAAGVLANPYGR.D<br>K.WQPGPTLVITVGR.V<br>R.LGAGVYVTKR.R<br>R.LAINATNLLDNR.Y<br>K.SEVNTDLDLPR.H<br>R.TIGLYADASDAR.M<br>R.STGPAWSLVTPSNTTVDALAEVSWNNR.L<br>R.SLQGMASVAHDFSDAVR.L<br>K.CLCVYQDQIR.F<br>K.LKSEVNTDLDLPR.H<br>K.SPGFETQGEINLVYSYDRK.E<br>R.YIDSLEYFTHYNSYNPTDPPAADR.R<br>R.GIEVEASHSLPNDLVLVNYGYNK.L<br>R.GIDALQFR.D<br>R.DRVTSQSQK.D<br>R.NVMATVGYR.F<br>K.VITADQYEAQSAISDVTK.Y<br>R.VTGSSGQKDNATFR.A<br>R.ARDADTYVK.H<br>K.EVLADVNLSDSFAVR.A<br>R.NRVYGEQSITQSGELTR.G<br>R.DIFSAYSITSDPYNFDREIVR.G<br>R.LGAGVYVTKR.R<br>R.YTFVKGKWDYR.Y<br>R.VSVLGRAR.R<br>R.HIASIWSK.T<br>R.DTRVDGFRVR.G<br>K.SPGFETQGEINLVYSYDRK.K<br>R.MNVFSTDNLLQHFHNTGAHVEHK.L<br>R.DADTYVK.H<br>R.YFASCLAR.G<br>R.YAGGLETIDYIDYDALLYDPSGPFRR.E<br>R.ESQKGLVYVQDQIR.F<br>K.RYAGGLETIDYIDYDALLYDPSGPFRR.E<br>K.HVPDDR.V<br>R.AMTQSEGNISHAAK.L<br>R.VLGGMITGAPEMLK.V<br>K.IELAHGTLFLDEVDGIPLSLQVK.L<br>R.SLADEGANLTVAK.A<br>K.AYQTFQDEGLTVTKR<br>R.IVTVADDQR.A<br>R.AIIELALR.T<br>K.ENPGAAGMDLSALDQFAHQAPTLVLLSTPVK.G<br>R.PRPPEYDEVVR.A<br>R.AAFALLK.E<br>K.ELAEQAAGVHPEPK.G<br>R.DADELAGSKELAEQAAGVHPEPK.G<br>K.AYAHQGDAAQFLGHPK.G<br>K.IEAVGGADTAIPAGVDVIDGTGK.V |
| YP_615991 | Sala_0940 | Peptidase M20D, amidohydrolase                                         | 77.40%            | 27                      |                                                                                                                                                                                                                                                                                                                                                                                                                                                                                                                                                                                                                                                                                                                                                                                                                                                                                                                                                                                                                                                                                                                                                                                                                                                                                                                                                                                                                                                                                                                                                                                                                                                                                                                                                                                                                                                                                                                                                                                                                                                                                                                                                                                                                                                                                                                                                                                                                                                                                                                                                                                                                                                                                                                                                                                                                                                                                                                                                                                                                                                                                                                                                                                                                                                                     |
| YP_615994 | Sala_0943 | isocitrate lyase and phosphorylmutase                                  | 25.28%            | 8                       |                                                                                                                                                                                                                                                                                                                                                                                                                                                                                                                                                                                                                                                                                                                                                                                                                                                                                                                                                                                                                                                                                                                                                                                                                                                                                                                                                                                                                                                                                                                                                                                                                                                                                                                                                                                                                                                                                                                                                                                                                                                                                                                                                                                                                                                                                                                                                                                                                                                                                                                                                                                                                                                                                                                                                                                                                                                                                                                                                                                                                                                                                                                                                                                                                                                                     |
| YP_615996 | Sala_0945 | hypothetical protein                                                   | 67.16%            | 24                      |                                                                                                                                                                                                                                                                                                                                                                                                                                                                                                                                                                                                                                                                                                                                                                                                                                                                                                                                                                                                                                                                                                                                                                                                                                                                                                                                                                                                                                                                                                                                                                                                                                                                                                                                                                                                                                                                                                                                                                                                                                                                                                                                                                                                                                                                                                                                                                                                                                                                                                                                                                                                                                                                                                                                                                                                                                                                                                                                                                                                                                                                                                                                                                                                                                                                     |
| YP_615997 | Sala_0946 | PepSY-associated TM helix                                              | 24.70%            | 8                       |                                                                                                                                                                                                                                                                                                                                                                                                                                                                                                                                                                                                                                                                                                                                                                                                                                                                                                                                                                                                                                                                                                                                                                                                                                                                                                                                                                                                                                                                                                                                                                                                                                                                                                                                                                                                                                                                                                                                                                                                                                                                                                                                                                                                                                                                                                                                                                                                                                                                                                                                                                                                                                                                                                                                                                                                                                                                                                                                                                                                                                                                                                                                                                                                                                                                     |
| YP_615998 | Sala_0947 | TonB-dependent siderophore receptor                                    | 73.21%            | 41                      |                                                                                                                                                                                                                                                                                                                                                                                                                                                                                                                                                                                                                                                                                                                                                                                                                                                                                                                                                                                                                                                                                                                                                                                                                                                                                                                                                                                                                                                                                                                                                                                                                                                                                                                                                                                                                                                                                                                                                                                                                                                                                                                                                                                                                                                                                                                                                                                                                                                                                                                                                                                                                                                                                                                                                                                                                                                                                                                                                                                                                                                                                                                                                                                                                                                                     |
| YP_616001 | Sala_0950 | two component, sigma54 specific, transcriptional regulator, Fis family | 11.35%            | 3                       |                                                                                                                                                                                                                                                                                                                                                                                                                                                                                                                                                                                                                                                                                                                                                                                                                                                                                                                                                                                                                                                                                                                                                                                                                                                                                                                                                                                                                                                                                                                                                                                                                                                                                                                                                                                                                                                                                                                                                                                                                                                                                                                                                                                                                                                                                                                                                                                                                                                                                                                                                                                                                                                                                                                                                                                                                                                                                                                                                                                                                                                                                                                                                                                                                                                                     |
| YP_616003 | Sala_0952 | transcriptional regulator, GntR family                                 | 25.22%            | 2                       |                                                                                                                                                                                                                                                                                                                                                                                                                                                                                                                                                                                                                                                                                                                                                                                                                                                                                                                                                                                                                                                                                                                                                                                                                                                                                                                                                                                                                                                                                                                                                                                                                                                                                                                                                                                                                                                                                                                                                                                                                                                                                                                                                                                                                                                                                                                                                                                                                                                                                                                                                                                                                                                                                                                                                                                                                                                                                                                                                                                                                                                                                                                                                                                                                                                                     |
| YP_616004 | Sala_0953 | nitroreductase                                                         | 34.72%            | 5                       |                                                                                                                                                                                                                                                                                                                                                                                                                                                                                                                                                                                                                                                                                                                                                                                                                                                                                                                                                                                                                                                                                                                                                                                                                                                                                                                                                                                                                                                                                                                                                                                                                                                                                                                                                                                                                                                                                                                                                                                                                                                                                                                                                                                                                                                                                                                                                                                                                                                                                                                                                                                                                                                                                                                                                                                                                                                                                                                                                                                                                                                                                                                                                                                                                                                                     |
| YP_616005 | Sala_0954 | Amino acid/peptide transporter                                         | 7.78%             | 3                       |                                                                                                                                                                                                                                                                                                                                                                                                                                                                                                                                                                                                                                                                                                                                                                                                                                                                                                                                                                                                                                                                                                                                                                                                                                                                                                                                                                                                                                                                                                                                                                                                                                                                                                                                                                                                                                                                                                                                                                                                                                                                                                                                                                                                                                                                                                                                                                                                                                                                                                                                                                                                                                                                                                                                                                                                                                                                                                                                                                                                                                                                                                                                                                                                                                                                     |
| YP_616006 | Sala_0955 | amidohydrolase                                                         | 28.09%            | 10                      |                                                                                                                                                                                                                                                                                                                                                                                                                                                                                                                                                                                                                                                                                                                                                                                                                                                                                                                                                                                                                                                                                                                                                                                                                                                                                                                                                                                                                                                                                                                                                                                                                                                                                                                                                                                                                                                                                                                                                                                                                                                                                                                                                                                                                                                                                                                                                                                                                                                                                                                                                                                                                                                                                                                                                                                                                                                                                                                                                                                                                                                                                                                                                                                                                                                                     |



| Accession | Locus tag | Description                                                            | Sequence coverage | No. peptides identified | List of peptides identified                                                                                                                                                                                                                                                                                                                                                                                                                                                                                                                                                                                                                                                                                                                                                                                                                                                                                                                                                                                                                                                                                                                                                                                                                                                                                                                                                                                                                                                                                                                                                                                                                                                                                                                                                                                                                                                                                                                                                                                                                                                                                                                                                                                                                                                                                                                                                                                                                                                                                                                                                                                                                                                               |
|-----------|-----------|------------------------------------------------------------------------|-------------------|-------------------------|-------------------------------------------------------------------------------------------------------------------------------------------------------------------------------------------------------------------------------------------------------------------------------------------------------------------------------------------------------------------------------------------------------------------------------------------------------------------------------------------------------------------------------------------------------------------------------------------------------------------------------------------------------------------------------------------------------------------------------------------------------------------------------------------------------------------------------------------------------------------------------------------------------------------------------------------------------------------------------------------------------------------------------------------------------------------------------------------------------------------------------------------------------------------------------------------------------------------------------------------------------------------------------------------------------------------------------------------------------------------------------------------------------------------------------------------------------------------------------------------------------------------------------------------------------------------------------------------------------------------------------------------------------------------------------------------------------------------------------------------------------------------------------------------------------------------------------------------------------------------------------------------------------------------------------------------------------------------------------------------------------------------------------------------------------------------------------------------------------------------------------------------------------------------------------------------------------------------------------------------------------------------------------------------------------------------------------------------------------------------------------------------------------------------------------------------------------------------------------------------------------------------------------------------------------------------------------------------------------------------------------------------------------------------------------------------|
| YP_616007 | Sala_0956 | hypothetical protein                                                   | 67.22%            | 19                      | K.ALGIQEQTGLKPK.M<br>R.GVTFDDEGGR.I<br>K.VSTFHHAVESYK.I<br>K.ANPSTYTPYPPGRTFAVR.G<br>R.IDNGVVFAGGK.I<br>K.MEAYDSVNVNPLVHK.A<br>K.EGICSAWVADWWFK.M<br>R.GVTFDDEGGRIDNGVVFAGGK.I<br>K.PAASADKPAK.F<br>K.VPLVLSLSLDPFSEFL.L<br>R.VAAGGAVVPAGVER.V<br>R.VGLVEVDAVSGNDR.A<br>R.LVIGDGSAPIEGGTVVVR.G<br>R.LAATQSNAGR.L<br>R.VGQVVIWVNDPDELGSRPVAIWDGR.A<br>R.DRYATPQEGALPK.A<br>R.VIDGTTRFLVR.V<br>R.AATFLLE<br>R.AADIVNLK.L<br>K.LLVVGTDGWLVAR.E<br>R.ADAEALVR.V<br>R.VYTPGIVAFSR.V<br>R.FSAGLDIAPALNPMGSPVAVNR.A<br>R.ALQYVAFGEGAALK.A<br>K.MGYATQYAGNVLGLAR.M<br>R.YATPQEGALPK.A                                                                                                                                                                                                                                                                                                                                                                                                                                                                                                                                                                                                                                                                                                                                                                                                                                                                                                                                                                                                                                                                                                                                                                                                                                                                                                                                                                                                                                                                                                                                                                                                                                                                                                                                                                                                                                                                                                                                                                                                                                                                                                             |
| YP_616009 | Sala_0958 | aldo/keto reductase                                                    | 64.65%            | 18                      | R.MPGASGNTWDQFAAIISSAPAR.A<br>R.AIVAPGGSSNLVAGQGAVDLADMDMVTVR.PA<br>R.LGDTDFYQHR.V<br>K.GGNLYGEAADLDEATR.T<br>R.YSDENLPAIIVDAIGAVADK.H<br>R.VDPAIPIEEVGGMMELVK.E<br>K.QITGVDSGPNAR.K<br>K.AQVLAWLAR.G<br>K.AAPITALSQSEYSIWER.D<br>R.EHIGFVPSPLGR.G<br>R.HIALSEAGPETLR.R<br>K.QITGVDSGPNAR.S<br>R.YSDENLPAIIVDAIGAVADK.HGVS.K<br>R.GEDVIPGTR.R<br>R.DGLVIATK.F<br>R.ATMEDSVGAAVTLTADDIEAIDSAAK.G<br>R.HIALSEAGPETLR.R<br>K.AAPITALQSEYSIWERDEDELPCVCR.E<br>R.VDPAIPIEEVGGMMELVK.E<br>R.SRDELPEHDWR.R<br>R.LFLSTAAALR.D<br>K.ASEELGVAPK.K<br>R.TVGNVVAATAAT.F<br>R.FAAGEETHAPAGETP.<br>K.LSDADAAER.L<br>R.VMAEGDDAGEVER.V<br>K.GSIIQDQIHLIGASWAR.Q<br>R.LADATHIGR.A<br>R.LVIRPSTGLEPLR.V<br>R.LKGGVATVMSNLGLER.F<br>K.GGGVATVMSNLGLER.F<br>R.VMAEGDDAGEVER.V<br>R.FLEGQLL.L<br>R.FAGGPLEDK.Q<br>K.GHGAGATVDR.L<br>R.LALLDAPGLGR.G<br>R.VPTMVLQIDVAAIDIGDAVK.I<br>R.LARPDLAEAALVDFPVMVATSGSLADAATDAFR.A<br>K.QLQLTQVDSFDNGYAR.F<br>R.KAAVMEALAAGAGVNDISALR.Y<br>K.AAVMEALAAGAGVNDISALR.Y<br>R.LGGTVVAVNQAAGAQQLL.V<br>R.DNGAVLSAIVPAELDDWIAAMPGR.L<br>R.VAACVAAGVDR.A<br>R.MIGALNEAARQ.L<br>K.LIVOPGIFRK.G<br>R.AYATIDDLVNAITDK.A<br>R.WFAPVEDELGK.Y<br>R.RAATATAFTGVSASE.<br>R.AATATAFTGVSASE.<br>R.WFAPVEDELGK.YQIK.G<br>R.AVFAGSSDQWAAASJAYGTDESAARR.A<br>K.GNAGVTACEPPK.G<br>R.KVEDVTHAGQPCR.A<br>R.AYATIDDLVNAITDKAR.I<br>R.SVVAADTDLAK.L<br>R.RGDVGLAR.H<br>R.AGASDFVQKPIADR.L<br>R.AAVGSITDVLTAADFR.A<br>K.AAQVELVSAHIK.Q<br>K.QDITVITLIPGRPAPR.L<br>K.LGLEALMEFMPR.I<br>K.AIFMGVGVAGLQAIATAR.R<br>R.RHGVTVGAK.N<br>R.LISDAQLATM.R.S<br>R.LGAQVSATDVR.S<br>R.AQSMILSSQANLAGYK.A<br>K.AVLMANAYGR.A<br>K.NIAMLMPADTSAFNR.N<br>R.ANDEYAK.L<br>K.EQILSLGAKPIFVENVAGIEGEGAGGYATEMSDEYK.A<br>K.GANIIIGIQPDPTLSGFAEGAWLAAGNPFGAR.A<br>R.AFFMMDTAAAGTSAK.A<br>R.VAATPETVKK.F<br>R.NLNFILSAFWDEKQKPVLDDEEIGNA.VR.L<br>R.SGVSIVDMAESGNGVEGVSGETR.R<br>R.SATKEQLSLGAK.P<br>R.LISDAQLATM.R.S<br>R.IHGVTVIGAK.N<br>K.PIIFENVAGIEGAGGYATEMSDEYK.A<br>K.NIAMLMPADTSAFNR.N<br>K.PILGAEVAVESGAGEQASIAADYGAAGASVGSRA<br>K.ELAGETR.V<br>K.AVLMANAYGR.A<br>K.LTAAALAAQIDAGGQTLK.T<br>K.AVVTQADVQANGVHVHIDAVLLPR.T<br>R.ESGDSILLTSASGNK.A<br>R.SVLAGLVNHYHVPK.L<br>K.TADGQDLHVR.E<br>K.AVVTQADVQANGVHVHIDAVLLPR.T<br>R.ELGAEIWAFAER.A<br>K.EIEVGFPSGATDFDIYQNLVLR.S<br>K.TAIVHVNALAPAWR.K<br>R.WEVPYLPIDPADLGR.S<br>R.APIWSTDLR.D<br>K.YSAFPVPLAK.R<br>R.VPDDVTPQVLTQSR.A<br>R.SGRVPPDVTQVLTQSR.A<br>K.GVAVVLEQDK.G<br>K.AGFKEIEVGFPSGATDFDIYQNLVLR.S<br>R.FQLDWSESHAGTDR.I<br>R.HPYGVALVYTFPSGSHQDAIK.K<br>R.GTGAALGLAGADR.V<br>R.TSFDSLAK.G.T<br>R.QNDERWEVYLPIDPADLGR.S<br>K.RFQLDWSESHAGTDR.I<br>K.IVFMDKDDIK.A<br>R.FFDLLVKA<br>R.DAAIISLHTHNR.G<br>K.MQASFSHIVQALADETSR.E<br>K.KMQASFSHIVQALADETSR.E |
| YP_616010 | Sala_0959 | sodium:dicarboxylate symporter                                         | 12.29%            | 4                       | R.SRDELPEHDWR.R<br>R.LFLSTAAALR.D<br>K.ASEELGVAPK.K<br>R.TVGNVVAATAAT.F<br>R.FAAGEETHAPAGETP.<br>K.LSDADAAER.L                                                                                                                                                                                                                                                                                                                                                                                                                                                                                                                                                                                                                                                                                                                                                                                                                                                                                                                                                                                                                                                                                                                                                                                                                                                                                                                                                                                                                                                                                                                                                                                                                                                                                                                                                                                                                                                                                                                                                                                                                                                                                                                                                                                                                                                                                                                                                                                                                                                                                                                                                                            |
| YP_616011 | Sala_0960 | phosphoglucosamine mutase                                              | 22.75%            | 10                      | R.VMAEGDDAGEVER.V<br>K.GSIIQDQIHLIGASWAR.Q<br>R.LADATHIGR.A<br>R.LVIRPSTGLEPLR.V<br>R.LKGGVATVMSNLGLER.F<br>K.GGGVATVMSNLGLER.F<br>R.VMAEGDDAGEVER.V<br>R.FLEGQLL.L<br>R.FAGGPLEDK.Q<br>K.GHGAGATVDR.L<br>R.LALLDAPGLGR.G<br>R.VPTMVLQIDVAAIDIGDAVK.I<br>R.LARPDLAEAALVDFPVMVATSGSLADAATDAFR.A<br>K.QLQLTQVDSFDNGYAR.F<br>R.KAAVMEALAAGAGVNDISALR.Y<br>K.AAVMEALAAGAGVNDISALR.Y<br>R.LGGTVVAVNQAAGAQQLL.V<br>R.DNGAVLSAIVPAELDDWIAAMPGR.L<br>R.VAACVAAGVDR.A<br>R.MIGALNEAARQ.L<br>K.LIVOPGIFRK.G<br>R.AYATIDDLVNAITDK.A<br>R.WFAPVEDELGK.Y<br>R.RAATATAFTGVSASE.<br>R.AATATAFTGVSASE.<br>R.WFAPVEDELGK.YQIK.G<br>R.AVFAGSSDQWAAASJAYGTDESAARR.A<br>K.GNAGVTACEPPK.G<br>R.KVEDVTHAGQPCR.A<br>R.AYATIDDLVNAITDKAR.I<br>R.SVVAADTDLAK.L<br>R.RGDVGLAR.H<br>R.AGASDFVQKPIADR.L<br>R.AAVGSITDVLTAADFR.A<br>K.AAQVELVSAHIK.Q<br>K.QDITVITLIPGRPAPR.L<br>K.LGLEALMEFMPR.I<br>K.AIFMGVGVAGLQAIATAR.R<br>R.RHGVTVGAK.N<br>R.LISDAQLATM.R.S<br>R.LGAQVSATDVR.S<br>R.AQSMILSSQANLAGYK.A<br>K.AVLMANAYGR.A<br>K.NIAMLMPADTSAFNR.N<br>R.ANDEYAK.L<br>K.EQILSLGAKPIFVENVAGIEGEGAGGYATEMSDEYK.A<br>K.GANIIIGIQPDPTLSGFAEGAWLAAGNPFGAR.A<br>R.AFFMMDTAAAGTSAK.A<br>R.VAATPETVKK.F<br>R.NLNFILSAFWDEKQKPVLDDEEIGNA.VR.L<br>R.SGVSIVDMAESGNGVEGVSGETR.R<br>R.SATKEQLSLGAK.P<br>R.LISDAQLATM.R.S<br>R.IHGVTVIGAK.N<br>K.PIIFENVAGIEGAGGYATEMSDEYK.A<br>K.NIAMLMPADTSAFNR.N<br>K.PILGAEVAVESGAGEQASIAADYGAAGASVGSRA<br>K.ELAGETR.V<br>K.AVLMANAYGR.A<br>K.LTAAALAAQIDAGGQTLK.T<br>K.AVVTQADVQANGVHVHIDAVLLPR.T<br>R.ESGDSILLTSASGNK.A<br>R.SVLAGLVNHYHVPK.L<br>K.TADGQDLHVR.E<br>K.AVVTQADVQANGVHVHIDAVLLPR.T<br>R.ELGAEIWAFAER.A<br>K.EIEVGFPSGATDFDIYQNLVLR.S<br>K.TAIVHVNALAPAWR.K<br>R.WEVPYLPIDPADLGR.S<br>R.APIWSTDLR.D<br>K.YSAFPVPLAK.R<br>R.VPDDVTPQVLTQSR.A<br>R.SGRVPPDVTQVLTQSR.A<br>K.GVAVVLEQDK.G<br>K.AGFKEIEVGFPSGATDFDIYQNLVLR.S<br>R.FQLDWSESHAGTDR.I<br>R.HPYGVALVYTFPSGSHQDAIK.K<br>R.GTGAALGLAGADR.V<br>R.TSFDSLAK.G.T<br>R.QNDERWEVYLPIDPADLGR.S<br>K.RFQLDWSESHAGTDR.I<br>K.IVFMDKDDIK.A<br>R.FFDLLVKA<br>R.DAAIISLHTHNR.G<br>K.MQASFSHIVQALADETSR.E<br>K.KMQASFSHIVQALADETSR.E                                                                                                                                                                                                                                                                                                                                                                                                                                                                                                                                                                                                       |
| YP_616013 | Sala_0962 | Phosphomethylpyrimidine kinase                                         | 25.65%            | 5                       | R.VMAEGDDAGEVER.V<br>K.GSIIQDQIHLIGASWAR.Q<br>R.LADATHIGR.A<br>R.LVIRPSTGLEPLR.V<br>R.LKGGVATVMSNLGLER.F<br>K.GGGVATVMSNLGLER.F<br>R.VMAEGDDAGEVER.V<br>R.FLEGQLL.L<br>R.FAGGPLEDK.Q<br>K.GHGAGATVDR.L<br>R.LALLDAPGLGR.G<br>R.VPTMVLQIDVAAIDIGDAVK.I<br>R.LARPDLAEAALVDFPVMVATSGSLADAATDAFR.A<br>K.QLQLTQVDSFDNGYAR.F<br>R.KAAVMEALAAGAGVNDISALR.Y<br>K.AAVMEALAAGAGVNDISALR.Y<br>R.LGGTVVAVNQAAGAQQLL.V<br>R.DNGAVLSAIVPAELDDWIAAMPGR.L<br>R.VAACVAAGVDR.A<br>R.MIGALNEAARQ.L<br>K.LIVOPGIFRK.G<br>R.AYATIDDLVNAITDK.A<br>R.WFAPVEDELGK.Y<br>R.RAATATAFTGVSASE.<br>R.AATATAFTGVSASE.<br>R.WFAPVEDELGK.YQIK.G<br>R.AVFAGSSDQWAAASJAYGTDESAARR.A<br>K.GNAGVTACEPPK.G<br>R.KVEDVTHAGQPCR.A<br>R.AYATIDDLVNAITDKAR.I<br>R.SVVAADTDLAK.L<br>R.RGDVGLAR.H<br>R.AGASDFVQKPIADR.L<br>R.AAVGSITDVLTAADFR.A<br>K.AAQVELVSAHIK.Q<br>K.QDITVITLIPGRPAPR.L<br>K.LGLEALMEFMPR.I<br>K.AIFMGVGVAGLQAIATAR.R<br>R.RHGVTVGAK.N<br>R.LISDAQLATM.R.S<br>R.LGAQVSATDVR.S<br>R.AQSMILSSQANLAGYK.A<br>K.AVLMANAYGR.A<br>K.NIAMLMPADTSAFNR.N<br>R.ANDEYAK.L<br>K.EQILSLGAKPIFVENVAGIEGEGAGGYATEMSDEYK.A<br>K.GANIIIGIQPDPTLSGFAEGAWLAAGNPFGAR.A<br>R.AFFMMDTAAAGTSAK.A<br>R.VAATPETVKK.F<br>R.NLNFILSAFWDEKQKPVLDDEEIGNA.VR.L<br>R.SGVSIVDMAESGNGVEGVSGETR.R<br>R.SATKEQLSLGAK.P<br>R.LISDAQLATM.R.S<br>R.IHGVTVIGAK.N<br>K.PIIFENVAGIEGAGGYATEMSDEYK.A<br>K.NIAMLMPADTSAFNR.N<br>K.PILGAEVAVESGAGEQASIAADYGAAGASVGSRA<br>K.ELAGETR.V<br>K.AVLMANAYGR.A<br>K.LTAAALAAQIDAGGQTLK.T<br>K.AVVTQADVQANGVHVHIDAVLLPR.T<br>R.ESGDSILLTSASGNK.A<br>R.SVLAGLVNHYHVPK.L<br>K.TADGQDLHVR.E<br>K.AVVTQADVQANGVHVHIDAVLLPR.T<br>R.ELGAEIWAFAER.A<br>K.EIEVGFPSGATDFDIYQNLVLR.S<br>K.TAIVHVNALAPAWR.K<br>R.WEVPYLPIDPADLGR.S<br>R.APIWSTDLR.D<br>K.YSAFPVPLAK.R<br>R.VPDDVTPQVLTQSR.A<br>R.SGRVPPDVTQVLTQSR.A<br>K.GVAVVLEQDK.G<br>K.AGFKEIEVGFPSGATDFDIYQNLVLR.S<br>R.FQLDWSESHAGTDR.I<br>R.HPYGVALVYTFPSGSHQDAIK.K<br>R.GTGAALGLAGADR.V<br>R.TSFDSLAK.G.T<br>R.QNDERWEVYLPIDPADLGR.S<br>K.RFQLDWSESHAGTDR.I<br>K.IVFMDKDDIK.A<br>R.FFDLLVKA<br>R.DAAIISLHTHNR.G<br>K.MQASFSHIVQALADETSR.E<br>K.KMQASFSHIVQALADETSR.E                                                                                                                                                                                                                                                                                                                                                                                                                                                                                                                                                                                                       |
| YP_616017 | Sala_0966 | dihydropteroate synthase                                               | 27.66%            | 7                       | R.LARPDLAEAALVDFPVMVATSGSLADAATDAFR.A<br>K.QLQLTQVDSFDNGYAR.F<br>R.KAAVMEALAAGAGVNDISALR.Y<br>K.AAVMEALAAGAGVNDISALR.Y<br>R.LGGTVVAVNQAAGAQQLL.V<br>R.DNGAVLSAIVPAELDDWIAAMPGR.L<br>R.VAACVAAGVDR.A<br>R.MIGALNEAARQ.L<br>K.LIVOPGIFRK.G<br>R.AYATIDDLVNAITDK.A<br>R.WFAPVEDELGK.Y<br>R.RAATATAFTGVSASE.<br>R.AATATAFTGVSASE.<br>R.WFAPVEDELGK.YQIK.G<br>R.AVFAGSSDQWAAASJAYGTDESAARR.A<br>K.GNAGVTACEPPK.G<br>R.KVEDVTHAGQPCR.A<br>R.AYATIDDLVNAITDKAR.I<br>R.SVVAADTDLAK.L<br>R.RGDVGLAR.H<br>R.AGASDFVQKPIADR.L<br>R.AAVGSITDVLTAADFR.A<br>K.AAQVELVSAHIK.Q<br>K.QDITVITLIPGRPAPR.L<br>K.LGLEALMEFMPR.I<br>K.AIFMGVGVAGLQAIATAR.R<br>R.RHGVTVGAK.N<br>R.LISDAQLATM.R.S<br>R.LGAQVSATDVR.S<br>R.AQSMILSSQANLAGYK.A<br>K.AVLMANAYGR.A<br>K.NIAMLMPADTSAFNR.N<br>R.ANDEYAK.L<br>K.EQILSLGAKPIFVENVAGIEGEGAGGYATEMSDEYK.A<br>K.GANIIIGIQPDPTLSGFAEGAWLAAGNPFGAR.A<br>R.AFFMMDTAAAGTSAK.A<br>R.VAATPETVKK.F<br>R.NLNFILSAFWDEKQKPVLDDEEIGNA.VR.L<br>R.SGVSIVDMAESGNGVEGVSGETR.R<br>R.SATKEQLSLGAK.P<br>R.LISDAQLATM.R.S<br>R.IHGVTVIGAK.N<br>K.PIIFENVAGIEGAGGYATEMSDEYK.A<br>K.NIAMLMPADTSAFNR.N<br>K.PILGAEVAVESGAGEQASIAADYGAAGASVGSRA<br>K.ELAGETR.V<br>K.AVLMANAYGR.A<br>K.LTAAALAAQIDAGGQTLK.T<br>K.AVVTQADVQANGVHVHIDAVLLPR.T<br>R.ESGDSILLTSASGNK.A<br>R.SVLAGLVNHYHVPK.L<br>K.TADGQDLHVR.E<br>K.AVVTQADVQANGVHVHIDAVLLPR.T<br>R.ELGAEIWAFAER.A<br>K.EIEVGFPSGATDFDIYQNLVLR.S<br>K.TAIVHVNALAPAWR.K<br>R.WEVPYLPIDPADLGR.S<br>R.APIWSTDLR.D<br>K.YSAFPVPLAK.R<br>R.VPDDVTPQVLTQSR.A<br>R.SGRVPPDVTQVLTQSR.A<br>K.GVAVVLEQDK.G<br>K.AGFKEIEVGFPSGATDFDIYQNLVLR.S<br>R.FQLDWSESHAGTDR.I<br>R.HPYGVALVYTFPSGSHQDAIK.K<br>R.GTGAALGLAGADR.V<br>R.TSFDSLAK.G.T<br>R.QNDERWEVYLPIDPADLGR.S<br>K.RFQLDWSESHAGTDR.I<br>K.IVFMDKDDIK.A<br>R.FFDLLVKA<br>R.DAAIISLHTHNR.G<br>K.MQASFSHIVQALADETSR.E<br>K.KMQASFSHIVQALADETSR.E                                                                                                                                                                                                                                                                                                                                                                                                                                                                                                                                                                                                                                                                                                                                                                                                                                                                |
| YP_616019 | Sala_0968 | hypothetical protein                                                   | 48.85%            | 9                       | R.AYATIDDLVNAITDK.A<br>R.WFAPVEDELGK.Y<br>R.RAATATAFTGVSASE.<br>R.AATATAFTGVSASE.<br>R.WFAPVEDELGK.YQIK.G<br>R.AVFAGSSDQWAAASJAYGTDESAARR.A<br>K.GNAGVTACEPPK.G<br>R.KVEDVTHAGQPCR.A<br>R.AYATIDDLVNAITDKAR.I<br>R.SVVAADTDLAK.L<br>R.RGDVGLAR.H<br>R.AGASDFVQKPIADR.L<br>R.AAVGSITDVLTAADFR.A<br>K.AAQVELVSAHIK.Q<br>K.QDITVITLIPGRPAPR.L<br>K.LGLEALMEFMPR.I<br>K.AIFMGVGVAGLQAIATAR.R<br>R.RHGVTVGAK.N<br>R.LISDAQLATM.R.S<br>R.LGAQVSATDVR.S<br>R.AQSMILSSQANLAGYK.A<br>K.AVLMANAYGR.A<br>K.NIAMLMPADTSAFNR.N<br>R.ANDEYAK.L<br>K.EQILSLGAKPIFVENVAGIEGEGAGGYATEMSDEYK.A<br>K.GANIIIGIQPDPTLSGFAEGAWLAAGNPFGAR.A<br>R.AFFMMDTAAAGTSAK.A<br>R.VAATPETVKK.F<br>R.NLNFILSAFWDEKQKPVLDDEEIGNA.VR.L<br>R.SGVSIVDMAESGNGVEGVSGETR.R<br>R.SATKEQLSLGAK.P<br>R.LISDAQLATM.R.S<br>R.IHGVTVIGAK.N<br>K.PIIFENVAGIEGAGGYATEMSDEYK.A<br>K.NIAMLMPADTSAFNR.N<br>K.PILGAEVAVESGAGEQASIAADYGAAGASVGSRA<br>K.ELAGETR.V<br>K.AVLMANAYGR.A<br>K.LTAAALAAQIDAGGQTLK.T<br>K.AVVTQADVQANGVHVHIDAVLLPR.T<br>R.ESGDSILLTSASGNK.A<br>R.SVLAGLVNHYHVPK.L<br>K.TADGQDLHVR.E<br>K.AVVTQADVQANGVHVHIDAVLLPR.T<br>R.ELGAEIWAFAER.A<br>K.EIEVGFPSGATDFDIYQNLVLR.S<br>K.TAIVHVNALAPAWR.K<br>R.WEVPYLPIDPADLGR.S<br>R.APIWSTDLR.D<br>K.YSAFPVPLAK.R<br>R.VPDDVTPQVLTQSR.A<br>R.SGRVPPDVTQVLTQSR.A<br>K.GVAVVLEQDK.G<br>K.AGFKEIEVGFPSGATDFDIYQNLVLR.S<br>R.FQLDWSESHAGTDR.I<br>R.HPYGVALVYTFPSGSHQDAIK.K<br>R.GTGAALGLAGADR.V<br>R.TSFDSLAK.G.T<br>R.QNDERWEVYLPIDPADLGR.S<br>K.RFQLDWSESHAGTDR.I<br>K.IVFMDKDDIK.A<br>R.FFDLLVKA<br>R.DAAIISLHTHNR.G<br>K.MQASFSHIVQALADETSR.E<br>K.KMQASFSHIVQALADETSR.E                                                                                                                                                                                                                                                                                                                                                                                                                                                                                                                                                                                                                                                                                                                                                                                                                                                                                                                                                                                                                                                                                                            |
| YP_616020 | Sala_0969 | two component, sigma54 specific, transcriptional regulator, Fis family | 10.88%            | 4                       | R.AYATIDDLVNAITDK.A<br>R.WFAPVEDELGK.Y<br>R.RAATATAFTGVSASE.<br>R.AATATAFTGVSASE.<br>R.WFAPVEDELGK.YQIK.G<br>R.AVFAGSSDQWAAASJAYGTDESAARR.A<br>K.GNAGVTACEPPK.G<br>R.KVEDVTHAGQPCR.A<br>R.AYATIDDLVNAITDKAR.I<br>R.SVVAADTDLAK.L<br>R.RGDVGLAR.H<br>R.AGASDFVQKPIADR.L<br>R.AAVGSITDVLTAADFR.A<br>K.AAQVELVSAHIK.Q<br>K.QDITVITLIPGRPAPR.L<br>K.LGLEALMEFMPR.I<br>K.AIFMGVGVAGLQAIATAR.R<br>R.RHGVTVGAK.N<br>R.LISDAQLATM.R.S<br>R.LGAQVSATDVR.S<br>R.AQSMILSSQANLAGYK.A<br>K.AVLMANAYGR.A<br>K.NIAMLMPADTSAFNR.N<br>R.ANDEYAK.L<br>K.EQILSLGAKPIFVENVAGIEGEGAGGYATEMSDEYK.A<br>K.GANIIIGIQPDPTLSGFAEGAWLAAGNPFGAR.A<br>R.AFFMMDTAAAGTSAK.A<br>R.VAATPETVKK.F<br>R.NLNFILSAFWDEKQKPVLDDEEIGNA.VR.L<br>R.SGVSIVDMAESGNGVEGVSGETR.R<br>R.SATKEQLSLGAK.P<br>R.LISDAQLATM.R.S<br>R.IHGVTVIGAK.N<br>K.PIIFENVAGIEGAGGYATEMSDEYK.A<br>K.NIAMLMPADTSAFNR.N<br>K.PILGAEVAVESGAGEQASIAADYGAAGASVGSRA<br>K.ELAGETR.V<br>K.AVLMANAYGR.A<br>K.LTAAALAAQIDAGGQTLK.T<br>K.AVVTQADVQANGVHVHIDAVLLPR.T<br>R.ESGDSILLTSASGNK.A<br>R.SVLAGLVNHYHVPK.L<br>K.TADGQDLHVR.E<br>K.AVVTQADVQANGVHVHIDAVLLPR.T<br>R.ELGAEIWAFAER.A<br>K.EIEVGFPSGATDFDIYQNLVLR.S<br>K.TAIVHVNALAPAWR.K<br>R.WEVPYLPIDPADLGR.S<br>R.APIWSTDLR.D<br>K.YSAFPVPLAK.R<br>R.VPDDVTPQVLTQSR.A<br>R.SGRVPPDVTQVLTQSR.A<br>K.GVAVVLEQDK.G<br>K.AGFKEIEVGFPSGATDFDIYQNLVLR.S<br>R.FQLDWSESHAGTDR.I<br>R.HPYGVALVYTFPSGSHQDAIK.K<br>R.GTGAALGLAGADR.V<br>R.TSFDSLAK.G.T<br>R.QNDERWEVYLPIDPADLGR.S<br>K.RFQLDWSESHAGTDR.I<br>K.IVFMDKDDIK.A<br>R.FFDLLVKA<br>R.DAAIISLHTHNR.G<br>K.MQASFSHIVQALADETSR.E<br>K.KMQASFSHIVQALADETSR.E                                                                                                                                                                                                                                                                                                                                                                                                                                                                                                                                                                                                                                                                                                                                                                                                                                                                                                                                                                                                                                                                                                            |
| YP_616021 | Sala_0971 | alanine dehydrogenase/PNT-like protein                                 | 94.37%            | 25                      | R.AYATIDDLVNAITDK.A<br>R.WFAPVEDELGK.Y<br>R.RAATATAFTGVSASE.<br>R.AATATAFTGVSASE.<br>R.WFAPVEDELGK.YQIK.G<br>R.AVFAGSSDQWAAASJAYGTDESAARR.A<br>K.GNAGVTACEPPK.G<br>R.KVEDVTHAGQPCR.A<br>R.AYATIDDLVNAITDKAR.I<br>R.SVVAADTDLAK.L<br>R.RGDVGLAR.H<br>R.AGASDFVQKPIADR.L<br>R.AAVGSITDVLTAADFR.A<br>K.AAQVELVSAHIK.Q<br>K.QDITVITLIPGRPAPR.L<br>K.LGLEALMEFMPR.I<br>K.AIFMGVGVAGLQAIATAR.R<br>R.RHGVTVGAK.N<br>R.LISDAQLATM.R.S<br>R.LGAQVSATDVR.S<br>R.AQSMILSSQANLAGYK.A<br>K.AVLMANAYGR.A<br>K.NIAMLMPADTSAFNR.N<br>R.ANDEYAK.L<br>K.EQILSLGAKPIFVENVAGIEGEGAGGYATEMSDEYK.A<br>K.GANIIIGIQPDPTLSGFAEGAWLAAGNPFGAR.A<br>R.AFFMMDTAAAGTSAK.A<br>R.VAATPETVKK.F<br>R.NLNFILSAFWDEKQKPVLDDEEIGNA.VR.L<br>R.SGVSIVDMAESGNGVEGVSGETR.R<br>R.SATKEQLSLGAK.P<br>R.LISDAQLATM.R.S<br>R.IHGVTVIGAK.N<br>K.PIIFENVAGIEGAGGYATEMSDEYK.A<br>K.NIAMLMPADTSAFNR.N<br>K.PILGAEVAVESGAGEQASIAADYGAAGASVGSRA<br>K.ELAGETR.V<br>K.AVLMANAYGR.A<br>K.LTAAALAAQIDAGGQTLK.T<br>K.AVVTQADVQANGVHVHIDAVLLPR.T<br>R.ESGDSILLTSASGNK.A<br>R.SVLAGLVNHYHVPK.L<br>K.TADGQDLHVR.E<br>K.AVVTQADVQANGVHVHIDAVLLPR.T<br>R.ELGAEIWAFAER.A<br>K.EIEVGFPSGATDFDIYQNLVLR.S<br>K.TAIVHVNALAPAWR.K<br>R.WEVPYLPIDPADLGR.S<br>R.APIWSTDLR.D<br>K.YSAFPVPLAK.R<br>R.VPDDVTPQVLTQSR.A<br>R.SGRVPPDVTQVLTQSR.A<br>K.GVAVVLEQDK.G<br>K.AGFKEIEVGFPSGATDFDIYQNLVLR.S<br>R.FQLDWSESHAGTDR.I<br>R.HPYGVALVYTFPSGSHQDAIK.K<br>R.GTGAALGLAGADR.V<br>R.TSFDSLAK.G.T<br>R.QNDERWEVYLPIDPADLGR.S<br>K.RFQLDWSESHAGTDR.I<br>K.IVFMDKDDIK.A<br>R.FFDLLVKA<br>R.DAAIISLHTHNR.G<br>K.MQASFSHIVQALADETSR.E<br>K.KMQASFSHIVQALADETSR.E                                                                                                                                                                                                                                                                                                                                                                                                                                                                                                                                                                                                                                                                                                                                                                                                                                                                                                                                                                                                                                                                                                            |
| YP_616023 | Sala_0973 | beta-Ig-H3/fascinlin                                                   | 42.57%            | 6                       | R.AYATIDDLVNAITDK.A<br>R.WFAPVEDELGK.Y<br>R.RAATATAFTGVSASE.<br>R.AATATAFTGVSASE.<br>R.WFAPVEDELGK.YQIK.G<br>R.AVFAGSSDQWAAASJAYGTDESAARR.A<br>K.GNAGVTACEPPK.G<br>R.KVEDVTHAGQPCR.A<br>R.AYATIDDLVNAITDKAR.I<br>R.SVVAADTDLAK.L<br>R.RGDVGLAR.H<br>R.AGASDFVQKPIADR.L<br>R.AAVGSITDVLTAADFR.A<br>K.AAQVELVSAHIK.Q<br>K.QDITVITLIPGRPAPR.L<br>K.LGLEALMEFMPR.I<br>K.AIFMGVGVAGLQAIATAR.R<br>R.RHGVTVGAK.N<br>R.LISDAQLATM.R.S<br>R.LGAQVSATDVR.S<br>R.AQSMILSSQANLAGYK.A<br>K.AVLMANAYGR.A<br>K.NIAMLMPADTSAFNR.N<br>R.ANDEYAK.L<br>K.EQILSLGAKPIFVENVAGIEGEGAGGYATEMSDEYK.A<br>K.GANIIIGIQPDPTLSGFAEGAWLAAGNPFGAR.A<br>R.AFFMMDTAAAGTSAK.A<br>R.VAATPETVKK.F<br>R.NLNFILSAFWDEKQKPVLDDEEIGNA.VR.L<br>R.SGVSIVDMAESGNGVEGVSGETR.R<br>R.SATKEQLSLGAK.P<br>R.LISDAQLATM.R.S<br>R.IHGVTVIGAK.N<br>K.PIIFENVAGIEGAGGYATEMSDEYK.A<br>K.NIAMLMPADTSAFNR.N<br>K.PILGAEVAVESGAGEQASIAADYGAAGASVGSRA<br>K.ELAGETR.V<br>K.AVLMANAYGR.A<br>K.LTAAALAAQIDAGGQTLK.T<br>K.AVVTQADVQANGVHVHIDAVLLPR.T<br>R.ESGDSILLTSASGNK.A<br>R.SVLAGLVNHYHVPK.L<br>K.TADGQDLHVR.E<br>K.AVVTQADVQANGVHVHIDAVLLPR.T<br>R.ELGAEIWAFAER.A<br>K.EIEVGFPSGATDFDIYQNLVLR.S<br>K.TAIVHVNALAPAWR.K<br>R.WEVPYLPIDPADLGR.S<br>R.APIWSTDLR.D<br>K.YSAFPVPLAK.R<br>R.VPDDVTPQVLTQSR.A<br>R.SGRVPPDVTQVLTQSR.A<br>K.GVAVVLEQDK.G<br>K.AGFKEIEVGFPSGATDFDIYQNLVLR.S<br>R.FQLDWSESHAGTDR.I<br>R.HPYGVALVYTFPSGSHQDAIK.K<br>R.GTGAALGLAGADR.V<br>R.TSFDSLAK.G.T<br>R.QNDERWEVYLPIDPADLGR.S<br>K.RFQLDWSESHAGTDR.I<br>K.IVFMDKDDIK.A<br>R.FFDLLVKA<br>R.DAAIISLHTHNR.G<br>K.MQASFSHIVQALADETSR.E<br>K.KMQASFSHIVQALADETSR.E                                                                                                                                                                                                                                                                                                                                                                                                                                                                                                                                                                                                                                                                                                                                                                                                                                                                                                                                                                                                                                                                                                            |
| YP_616024 | Sala_0974 | 2-isopropylmalate synthase                                             | 56.50%            | 31                      | R.AYATIDDLVNAITDK.A<br>R.WFAPVEDELGK.Y<br>R.RAATATAFTGVSASE.<br>R.AATATAFTGVSASE.<br>R.WFAPVEDELGK.YQIK.G<br>R.AVFAGSSDQWAAASJAYGTDESAARR.A<br>K.GNAGVTACEPPK.G<br>R.KVEDVTHAGQPCR.A<br>R.AYATIDDLVNAITDKAR.I<br>R.SVVAADTDLAK.L<br>R.RGDVGLAR.H<br>R.AGASDFVQKPIADR.L<br>R.AAVGSITDVLTAADFR.A<br>K.AAQVELVSAHIK.Q<br>K.QDITVITLIPGRPAPR.L<br>K.LGLEALMEFMPR.I<br>K.AIFMGVGVAGLQAIATAR.R<br>R.RHGVTVGAK.N<br>R.LISDAQLATM.R.S<br>R.LGAQVSATDVR.S<br>R.AQSMILSSQANLAGYK.A<br>K.AVLMANAYGR.A<br>K.NIAMLMPADTSAFNR.N<br>R.ANDEYAK.L<br>K.EQILSLGAKPIFVENVAGIEGEGAGGYATEMSDEYK.A<br>K.GANIIIGIQPDPTLSGFAEGAWLAAGNPFGAR.A<br>R.AFFMMDTAAAGTSAK.A<br>R.VAATPETVKK.F<br>R.NLNFILSAFWDEKQKPVLDDEEIGNA.VR.L<br>R.SGVSIVDMAESGNGVEGVSGETR.R<br>R.SATKEQLSLGAK.P<br>R.LISDAQLATM.R.S<br>R.IHGVTVIGAK.N<br>K.PIIFENVAGIEGAGGYATEMSDEYK.A<br>K.NIAMLMPADTSAFNR.N<br>K.PILGAEVAVESGAGEQASIAADYGAAGASVGSRA<br>K.ELAGETR.V<br>K.AVLMANAYGR.A<br>K.LTAAALAAQIDAGGQTLK.T<br>K.AVVTQADVQANGVHVHIDAVLLPR.T<br>R.ESGDSILLTSASGNK.A<br>R.SVLAGLVNHYHVPK.L<br>K.TADGQDLHVR.E<br>K.AVVTQADVQANGVHVHIDAVLLPR.T<br>R.ELGAEIWAFAER.A<br>K.EIEVGFPSGATDFDIYQNLVLR.S<br>K.TAIVHVNALAPAWR.K<br>R.WEVPYLPIDPADLGR.S<br>R.APIWSTDLR.D<br>K.YSAFPVPLAK.R<br>R.VPDDVTPQVLTQSR.A<br>R.SGRVPPDVTQVLTQSR.A<br>K.GVAVVLEQDK.G<br>K.AGFKEIEVGFPSGATDFDIYQNLVLR.S<br>R.FQLDWSESHAGTDR.I<br>R.HPYGVALVYTFPSGSHQDAIK.K<br>R.GTGAALGLAGADR.V<br>R.TSFDSLAK.G.T<br>R.QNDERWEVYLPIDPADLGR.S<br>K.RFQLDWSESHAGTDR.I<br>K.IVFMDKDDIK.A<br>R.FFDLLVKA<br>R.DAAIISLHTHNR.G<br>K.MQASFSHIVQALADETSR.E<br>K.KMQASFSHIVQALADETSR.E                                                                                                                                                                                                                                                                                                                                                                                                                                                                                                                                                                                                                                                                                                                                                                                                                                                                                                                                                                                                                                                                                                            |

| Accession | Locus tag | Description                                 | Sequence coverage | No. peptides identified | List of peptides identified                                                                                                                                                                                                                                                                                                                                                                                                                                                                                                                                                                                                                                                                                                                                                                                                                                                                                                                                                                                                                                                                                                                                                                                                                                                                                                                                                                                                                                                                                                                                                                                                                                                                                                                                                                                                                                                                                                                                                                                                                                                                                                                                                                                                                                                                                                                                                                                                                                                                                                                                                                                                                                                                                                                                                                                                                                                                                                                                                                                                                                                                                                                                                                                                                                                                                                                                                                                                                  |
|-----------|-----------|---------------------------------------------|-------------------|-------------------------|----------------------------------------------------------------------------------------------------------------------------------------------------------------------------------------------------------------------------------------------------------------------------------------------------------------------------------------------------------------------------------------------------------------------------------------------------------------------------------------------------------------------------------------------------------------------------------------------------------------------------------------------------------------------------------------------------------------------------------------------------------------------------------------------------------------------------------------------------------------------------------------------------------------------------------------------------------------------------------------------------------------------------------------------------------------------------------------------------------------------------------------------------------------------------------------------------------------------------------------------------------------------------------------------------------------------------------------------------------------------------------------------------------------------------------------------------------------------------------------------------------------------------------------------------------------------------------------------------------------------------------------------------------------------------------------------------------------------------------------------------------------------------------------------------------------------------------------------------------------------------------------------------------------------------------------------------------------------------------------------------------------------------------------------------------------------------------------------------------------------------------------------------------------------------------------------------------------------------------------------------------------------------------------------------------------------------------------------------------------------------------------------------------------------------------------------------------------------------------------------------------------------------------------------------------------------------------------------------------------------------------------------------------------------------------------------------------------------------------------------------------------------------------------------------------------------------------------------------------------------------------------------------------------------------------------------------------------------------------------------------------------------------------------------------------------------------------------------------------------------------------------------------------------------------------------------------------------------------------------------------------------------------------------------------------------------------------------------------------------------------------------------------------------------------------------------|
|           |           |                                             |                   |                         | R.HPYGGALVYTFSGSHQDAIKK.G<br>K.GGVAWVLEQDKGLK.L<br>R.SYEAIVR.V<br>R.ERQNDERWEVYPLIDPADLGR.S<br>R.DGNQSLIDPMDAEKK.T<br>R.AYLITDAK.R<br>R.APIWLSTDLRDGNQSLIDPMDAEK.K<br>R.AILSAANGA.<br>K.SLFGGGLDITDVATASVR.A<br>K.KMQASFSHIVQALADETS.R.E<br>K.YTGFIDGVTGTLVIDPANPAAR.V<br>K.VTTASAGLTSLLR.A<br>K.DGGKPDFFGAAPADAR.F<br>K.ATIGFEAEGTIR.R<br>R.VAAGTYVADPLHTMVVVEVDHFGFSK.Y<br>K.KATIGFEAEGTIR.R<br>R.VEVITPIAK.V<br>R.SDFGIAYGIPVVSDEVELEIHAAFEKQ.<br>R.RSDFGIAYGIPVVSDEVELEIHAAFEK.Q<br>R.AGKGGKPDFFGAAPADAR.F<br>R.IAPFAALALTAATAATVVAQDSGVPAGPDK.S<br>K.PDFFGAAPADAR.F<br>R.SAAELLDALVAR.E<br>R.LATSVAQTPAVER.A<br>R.VLLDISAQR.L<br>R.AWMDQAAAAFVDER.A<br>R.AVTGDDAQPAPKGEELALAA.<br>R.AVTGDDAQPAPK.G<br>R.EALSSEEFPAASEK.K<br>R.IPVHMIETINK.L<br>K.WAAFAEENAAVDR.I<br>R.ELEENWLEEVAGIDK.W<br>K.NAVIPVDAAVQSNLK.E<br>K.LRELLTAQVESVQFHGK.I<br>R.ESFDDDDDDNTLSLAAMELLKPDALK.F<br>R.LTALGGQMLR.L<br>R.GLQLDLIQEGNIGLMK.A<br>R.FGIGMNTDHTLEEVGQQFSVTR.E<br>R.EIVDLEAMLKDPAPENLDEEGAEDGEISEK.T<br>K.IEYLVQLYSNR.R<br>K.DPAPENLDEEGAEDGEISEK.T<br>K.TAGVSFKDEVEEPAADGDEDEGEGTSGK.R<br>K.EPISLETPIGDEEDSHLGFIEDK.N<br>K.NEADTAPLIDLNEADVKK.L<br>R.ELEENWLEEVAGIDK.K<br>K.NEADTAPLIDLNEADVKK.K<br>R.VLASLTPR.E<br>R.EMGAVELLSR.E<br>K.IAKEPISLETPIGDEEDSHLGFIEDK.N<br>K.EPISLETPIGDEEDSHLGFIEDKNAVIPVDAAVQSNLK.E<br>R.VEISEIAQAAGMSLTFE.R<br>R.QFLHESGREPTPEMAER.L<br>R.LEALSSEEFPAASEK.Y<br>R.LTALGGQMLR.L<br>R.ESFDDDDDDNTLSLAAMELLKPDALK.F<br>K.TAGVSFKDEVEEPAADGDEDEGEGTSGK.R<br>K.SFLDHYVGR.E<br>K.FSTYATWWR.Q<br>R.RLALGGQMLR.L<br>R.KSFLDHYVGR.E<br>R.IRVEISEIAQAAGMSLTFE.R<br>R.EIVDLEAMLKDPAPENLDEEGAEDGEISEK.T<br>K.AVDKFEYR.R<br>R.ALGQTGIAGPLAALLGGLLR.Y<br>R.DVMQAAAEWFAQQLGSSNGAPAR.E<br>K.GAEGFAILEDAPQVLR.L<br>R.LAIPDSGDAELGLMLDIANAR.E<br>K.YLNSPDTPLFDK.G<br>K.ACCPFHNEKTSFTINDEK.G<br>R.TGTAPDDDDALVTLQK.M<br>R.LGSQDMKSK.A<br>R.ESIAMEQSGR.Q<br>K.IKDKDIELR.T<br>K.AIVVELGAESLKD.MGK.V<br>K.AIVVELGAESLKD.D<br>K.FDIDALLAMAR.G<br>R.VGGDFADGVVETSMNHGFVADASTLPAGVETHK.S<br>R.SVQTLPEVWTEQGVIGLAGIDTR.A<br>R.TDTGTEWGGIWAIGK.G<br>K.NAFVSQYHPEASPGQDSFYLFK.F<br>R.DAGAPNGVIAHSPDAK.F<br>R.SVHGALGATR.E<br>R.GWPGLEGDLAK.T<br>R.PHYVADYGAK.D<br>R.PHGVSTSLDTNNGGATAQAR.P<br>R.NVPIFGICLGHQLLALAAGAR.T<br>K.SLFDGSGNGIATGK.N<br>K.GYQTFPASSEVEMPIDGAR.P<br>R.NSITVQAGDFTVTDGK.Y<br>K.VITFESDEGEDDTRPVSVDVWDTGLASK.A<br>R.NVIALQQAIMQSDASIDAK.T<br>K.VIATGDTADYLAGQIEVER.V<br>R.SREEIAVAAR.I<br>R.GLETLSGFNFVDR.L<br>K.AEADKAEQR.Q<br>R.GGLIASPTEVLEESLWGW.E<br>K.ERRDANLPTMGGQALNLTALFMDGTAK.Y<br>R.IKDGDVQLFNTTEGWQSLQDSQSIR.A<br>R.LAYLALQSANLHPGTR.R<br>K.LAQLSDAGIPILGTSPOAIDLAEADRER.F<br>R.EIGVETGGSNVQFVAVNK.D<br>R.EGLPLEEINR.V<br>R.SGIAHTLEAFVLR.T<br>R.AHSLVKPLQDY.<br>K.LGLKQPENGIAR.S<br>R.LLNAQAIR.E<br>R.IGYPVLTSPSYVLGGR.A<br>R.GSGLHEAVK.A<br>R.VAGYDMWFLER.I<br>R.GLMNVQYAVK.D<br>K.GELGVIVQFGGTPK.L<br>K.AMTGGVTEGEVR.A<br>K.DGEVYLIEVNR.A<br>K.AQLGAGDRLPDGR.L<br>R.TGLPSIIRPFTLGGTGGGIAYNR.E<br>R.IAEIVAEK.Q<br>K.SVGEVMAIGR.T<br>K.LAQLSDAGIPILGTSPOAIDLAEADRER.F<br>K.GASHEQLRNELAQR.T<br>R.LVLVNSNPATIMTDPDLADATYVEPITPEIVAK.I<br>R.FAALVINK.L<br>K.FKGAEATLSTAMK.S<br>R.LIVIEVNR.V<br>R.TIHESLQK.A<br>R.PSYVLGGR.A<br>K.IVILGGGPNR.I<br>R.KVILGGGPNR.I<br>R.GLMNVQYAVK.D<br>R.FPGTDPVLSPEMK.S<br>R.FPGTDPVLSPEMK.S<br>R.AMEIVDQAQLENYIETAVQVSGTSPVLIDR.Y<br>K.TIDTCAAEFAQK.T<br>K.STGEVMDIRDNLFAFAK.A<br>K.GAEATLSTAMK.S<br>K.AMTGGVTEGEVR.A<br>R.VAGYDMWFLER.I<br>R.TGLPSIIRPFTLGGTGGGIAYNREEFEQIVR.G |
| YP_616026 | Sala_0976 | YceI                                        | 88.26%            | 12                      |                                                                                                                                                                                                                                                                                                                                                                                                                                                                                                                                                                                                                                                                                                                                                                                                                                                                                                                                                                                                                                                                                                                                                                                                                                                                                                                                                                                                                                                                                                                                                                                                                                                                                                                                                                                                                                                                                                                                                                                                                                                                                                                                                                                                                                                                                                                                                                                                                                                                                                                                                                                                                                                                                                                                                                                                                                                                                                                                                                                                                                                                                                                                                                                                                                                                                                                                                                                                                                              |
| YP_616027 | Sala_0977 | hypothetical protein                        | 21.52%            | 4                       |                                                                                                                                                                                                                                                                                                                                                                                                                                                                                                                                                                                                                                                                                                                                                                                                                                                                                                                                                                                                                                                                                                                                                                                                                                                                                                                                                                                                                                                                                                                                                                                                                                                                                                                                                                                                                                                                                                                                                                                                                                                                                                                                                                                                                                                                                                                                                                                                                                                                                                                                                                                                                                                                                                                                                                                                                                                                                                                                                                                                                                                                                                                                                                                                                                                                                                                                                                                                                                              |
| YP_616028 | Sala_0978 | hypothetical protein                        | 20.41%            | 2                       |                                                                                                                                                                                                                                                                                                                                                                                                                                                                                                                                                                                                                                                                                                                                                                                                                                                                                                                                                                                                                                                                                                                                                                                                                                                                                                                                                                                                                                                                                                                                                                                                                                                                                                                                                                                                                                                                                                                                                                                                                                                                                                                                                                                                                                                                                                                                                                                                                                                                                                                                                                                                                                                                                                                                                                                                                                                                                                                                                                                                                                                                                                                                                                                                                                                                                                                                                                                                                                              |
| YP_616029 | Sala_0979 | RNA polymerase, sigma 70 subunit, RpoD      | 59.64%            | 35                      |                                                                                                                                                                                                                                                                                                                                                                                                                                                                                                                                                                                                                                                                                                                                                                                                                                                                                                                                                                                                                                                                                                                                                                                                                                                                                                                                                                                                                                                                                                                                                                                                                                                                                                                                                                                                                                                                                                                                                                                                                                                                                                                                                                                                                                                                                                                                                                                                                                                                                                                                                                                                                                                                                                                                                                                                                                                                                                                                                                                                                                                                                                                                                                                                                                                                                                                                                                                                                                              |
| YP_616030 | Sala_0980 | DNA primase                                 | 18.40%            | 6                       |                                                                                                                                                                                                                                                                                                                                                                                                                                                                                                                                                                                                                                                                                                                                                                                                                                                                                                                                                                                                                                                                                                                                                                                                                                                                                                                                                                                                                                                                                                                                                                                                                                                                                                                                                                                                                                                                                                                                                                                                                                                                                                                                                                                                                                                                                                                                                                                                                                                                                                                                                                                                                                                                                                                                                                                                                                                                                                                                                                                                                                                                                                                                                                                                                                                                                                                                                                                                                                              |
| YP_616032 | Sala_0982 | GatB/Yqey                                   | 42.00%            | 6                       |                                                                                                                                                                                                                                                                                                                                                                                                                                                                                                                                                                                                                                                                                                                                                                                                                                                                                                                                                                                                                                                                                                                                                                                                                                                                                                                                                                                                                                                                                                                                                                                                                                                                                                                                                                                                                                                                                                                                                                                                                                                                                                                                                                                                                                                                                                                                                                                                                                                                                                                                                                                                                                                                                                                                                                                                                                                                                                                                                                                                                                                                                                                                                                                                                                                                                                                                                                                                                                              |
| YP_616033 | Sala_0983 | carbamoyl-phosphate synthase, small subunit | 55.08%            | 13                      |                                                                                                                                                                                                                                                                                                                                                                                                                                                                                                                                                                                                                                                                                                                                                                                                                                                                                                                                                                                                                                                                                                                                                                                                                                                                                                                                                                                                                                                                                                                                                                                                                                                                                                                                                                                                                                                                                                                                                                                                                                                                                                                                                                                                                                                                                                                                                                                                                                                                                                                                                                                                                                                                                                                                                                                                                                                                                                                                                                                                                                                                                                                                                                                                                                                                                                                                                                                                                                              |
| YP_616034 | Sala_0984 | hypothetical protein                        | 42.86%            | 3                       |                                                                                                                                                                                                                                                                                                                                                                                                                                                                                                                                                                                                                                                                                                                                                                                                                                                                                                                                                                                                                                                                                                                                                                                                                                                                                                                                                                                                                                                                                                                                                                                                                                                                                                                                                                                                                                                                                                                                                                                                                                                                                                                                                                                                                                                                                                                                                                                                                                                                                                                                                                                                                                                                                                                                                                                                                                                                                                                                                                                                                                                                                                                                                                                                                                                                                                                                                                                                                                              |
| YP_616035 | Sala_0985 | carbamoyl-phosphate synthase, large subunit | 55.24%            | 52                      |                                                                                                                                                                                                                                                                                                                                                                                                                                                                                                                                                                                                                                                                                                                                                                                                                                                                                                                                                                                                                                                                                                                                                                                                                                                                                                                                                                                                                                                                                                                                                                                                                                                                                                                                                                                                                                                                                                                                                                                                                                                                                                                                                                                                                                                                                                                                                                                                                                                                                                                                                                                                                                                                                                                                                                                                                                                                                                                                                                                                                                                                                                                                                                                                                                                                                                                                                                                                                                              |

| <b>Accession</b> | <b>Locus tag</b> | <b>Description</b>                         | <b>Sequence coverage</b> | <b>No. peptides identified</b> | <b>List of peptides identified</b>                                                                                                                                                                                                                                                                                                                                                                                                                                                                                                                                                                                                                                                                                                                                                                                                                                                                                                                                                                                                                                                                                                                                                                                                                                                                                                                                                                                                                                                                                                                                                                                                                                                                                                                                                                                                                                                                                                                                                                                       |
|------------------|------------------|--------------------------------------------|--------------------------|--------------------------------|--------------------------------------------------------------------------------------------------------------------------------------------------------------------------------------------------------------------------------------------------------------------------------------------------------------------------------------------------------------------------------------------------------------------------------------------------------------------------------------------------------------------------------------------------------------------------------------------------------------------------------------------------------------------------------------------------------------------------------------------------------------------------------------------------------------------------------------------------------------------------------------------------------------------------------------------------------------------------------------------------------------------------------------------------------------------------------------------------------------------------------------------------------------------------------------------------------------------------------------------------------------------------------------------------------------------------------------------------------------------------------------------------------------------------------------------------------------------------------------------------------------------------------------------------------------------------------------------------------------------------------------------------------------------------------------------------------------------------------------------------------------------------------------------------------------------------------------------------------------------------------------------------------------------------------------------------------------------------------------------------------------------------|
| YP_616036        | Sala_0986        | transcription elongation factor GreA       | 81.65%                   | 12                             | R.GSGLIHEAVKMTGGVTEGEVR.A<br>K.YGVEMIGAK.A<br>K.IPYLYSTYEAFTFGEPECEANPSDRR.K<br>K.STGEVMGIDRDFNLAFKA.A<br>K.STGEVMGIDR.D<br>K.ERPDAVLPTMGGQALNTALALFNDDGLAK.Y<br>R.AHGDLSENAEYHAAK.E<br>R.QGQVEATIGDLEDKLSR.A<br>K.AEPLIVDAIEEAR.A<br>R.AQVIDPTLLSGDR.I<br>K.YQVGGQAEADAK.A<br>R.IVFGATVLTDEDDKPKV.Y<br>R.AHGDLSENAEYHAAKER.Q<br>K.LTAAALK.A<br>K.ISYNSPLGR.A<br>R.VDDIEVITVPSGDKYYLVTK.I<br>R.QGQVEATIGDLEDK.L<br>R.PLIVDAIEEAR.A<br>R.VPLNGIEDVAAK.R<br>K.VGAGGTVGGEDIVVHR.V<br>K.VGAGGTVGGEDIVVHRVPLNGIEDVAAK.R<br>R.ADVADIAASK.V<br>R.IVTDAAEAER.H<br>K.VAPAIWGDAMAALIER.I<br>R.QVGAVALTHFPK.S<br>R.HDGTGEIVTIAAR.S<br>K.LAGNPVVDQADIIPAAEEAALNTQLLDEK.R<br>R.FRDGGYPPGGR.A<br>R.EWIGIGDAERDDSVFLIAPNER.R<br>R.AGVNAIEQIPLPEEAAAR.A<br>K.LAGNPVVDQADIIPAAEEAALNTQLLDEK.R<br>R.DDGVVFLIAPNER.R<br>R.TGHQVAVVSDLEGRDVADYGR.L<br>R.INVAVQDYNAAVQDYNTTTR.T<br>K.GAANIEQSTLEGVQAR.A<br>K.LSTDDLDPAKVQAFQQAQGNVSSALGR.L<br>R.RADLPNLVETAK.G<br>K.VQAFQQAQGNVSSALGR.L<br>R.LLTVVEAYPDLK.S<br>K.WANVEAQR.R<br>R.FADLMTQLEGTENR.I<br>K.LSTDDLDPAK.V<br>R.AVTNANQAPK.V<br>R.ADLIPNLVETAK.G<br>K.IVHGAQPMTPYR.A<br>K.AKAWNEEAQR.R<br>R.FADLMTQLEGTENR.I<br>K.IVHGAQPMTPYR.A<br>R.LLTVVEAYPDLKSQAR.F<br>R.AVTNANQAPKVFQGG.<br>K.LPAGTVDTLLKPKESK.A<br>K.AAGLDTLSPGPTVFAPNTDAFAK.L<br>K.AALTGLVLYHVPGR.L<br>R.LTADIAAQAQ.A<br>R.NIVENAANSKDHITLVAAVK.A<br>K.IAPADVIGSNGVHVIVDAVLLPA.<br>K.AVLTVQGTTITVWEK.D<br>K.DHTTLVAAVK.A<br>K.AVLTVQGTTITVWEKGAWVSDANGK.A<br>K.AALTGLVLYHVPGR.LTADIAAQAQ.A<br>R.FEYQGVVAPADTAR.L<br>K.APSLQLVDFSGNAALRPER.S<br>R.VDNLFDADYATAFNGTYGR.A<br>R.HDDHNFQGGATTFGANANYSPPNGGATNVR.L<br>R.TDGISSAAVGETR.D<br>R.INTDQIEMNATFTYGNIDR.T<br>R.LDQVYVYAGLNLGLFDGR.F<br>R.LDGYALAGR.A<br>K.SYDVGIDQLADGR.A<br>R.LVFGYEHERPEYDFFGSTDSQK.A<br>R.DGYENJANAR.L<br>R.ALVSIFLR.N<br>R.ADLSGTTPVSGSISGGAYFR.T<br>K.VNDSFGIDGYDGHLLTGNIR.R<br>R.FTLTDADLAFTR.Q<br>R.TSLDLPNQALALEK.T<br>R.ELQALAVEGTR.L<br>K.IHFAVGAQAQR.D<br>R.TRPVTLLEGLQAGAPK.G<br>K.NKONVPLAASAK.S<br>K.IRPGELTASVTVNSGPR.D<br>K.IPLFGYDVHGHRT |
| YP_616038        | Sala_0988        | NUDIX hydrolase                            | 15.93%                   | 3                              | K.APVNTGDNPSR.T<br>R.NFYDYNWPNADNTR.T<br>R.RPDSFFPPAAPSFPGFAPPFGSIIITNGLETR.A<br>R.QLLAQAGPGGGR.E<br>R.DIRPFNLPLDFFPAEYR.G<br>R.WAFTPVVFNGLSFAYAAPNESNPAVIDR.A<br>K.LSFQPTSSDLELSGR.H<br>R.SMEGEVTGNISQR.Q<br>K.DGFAVLLGNR.R<br>R.SGTNEFHGEAFIDYDQGLR.D<br>R.NFLAFADLPVQVFTAGNDQSR.L<br>R.FVAGSVLDPIGVTLGK.F<br>R.ESGEFLSSGINAR.E<br>R.EISGIVGVGNNPR.T<br>R.SYDRNQDFRLQETISVGSFATR.T<br>R.IGGGANQDK.G<br>R.GVFGPTNATFNEDLYGK.L<br>R.WEHTADNWINDLK.L<br>R.RPNELTGT.I<br>R.LRLDINLFNDR.N<br>R.IGGGANQDKGQK.G<br>R.IGFSYELDDAR.F<br>K.LVKNYTAAFPWLAATYTYTEAENR.N<br>K.DFQGGALGGPII.D<br>K.AEFDQVSSVAITAVTR.S<br>K.SGEVDPVHGWWAR.D<br>K.GFFYHFLNEDGTR.R<br>R.GTTGGETAPVSSGARP<br>R.LLVQQLPADAVFAANDQMAVGLIAGLAEGK.S<br>R.VVAGVQPLTALDSEVAAAK.L<br>R.VQVLAGNVATGDATR.A<br>R.VAAATNGDSGVER.A<br>R.NLITEEQAAAVR.Q<br>R.FADNPGQPV.R.E<br>K.DVIHQVGGV.K.A<br>K.ALAAGASSVMVGLLAGTAEAPGETFLFQGR.T<br>R.YFQQDIKQMK.L<br>R.LIDAQAGV.K.V<br>R.ELMTEENLTVRPGVQDEAR.R<br>K.RFESGMIVNPTITPDAPLSDATALMNQHR.I<br>K.LVPEGIEQVFFKPAK.D<br>K.LVGILTHR.D<br>R.ISGIPVVESSGK.L<br>K.LGVPIADGGLR.T<br>R.FESGMIVNPTITPDAPLSDATALMNQHR.I<br>K.LVPEGIEQVFFK.G<br>R.GMGSVGAMAR.G<br>K.VGIGPGSICTTRVVAGVGPQLTALDSEVAAAK.L<br>K.AVNFDPATKDASGR.L<br>K.AAMGYTGSR.T<br>R.GMGSVGAMAR.SADR.Y<br>R.ESHVHVAATR.E<br>R.ELMTEENLTVRPGVQDEARR.L<br>K.VGIGPGSICTTR.V<br>K.ALAAGASSVMVGLLAGTAEAPGETFLFQGR.T                                                                                                                                                                                                                                                                                                                                                                                                                                                                                                                                                                                                                                                         |
| YP_616039        | Sala_0989        | protein of unknown function DUF477         | 28.07%                   | 5                              |                                                                                                                                                                                                                                                                                                                                                                                                                                                                                                                                                                                                                                                                                                                                                                                                                                                                                                                                                                                                                                                                                                                                                                                                                                                                                                                                                                                                                                                                                                                                                                                                                                                                                                                                                                                                                                                                                                                                                                                                                          |
| YP_616040        | Sala_0990        | protein of unknown function DUF477         | 38.43%                   | 7                              |                                                                                                                                                                                                                                                                                                                                                                                                                                                                                                                                                                                                                                                                                                                                                                                                                                                                                                                                                                                                                                                                                                                                                                                                                                                                                                                                                                                                                                                                                                                                                                                                                                                                                                                                                                                                                                                                                                                                                                                                                          |
| YP_616041        | Sala_0991        | LemA                                       | 74.00%                   | 17                             |                                                                                                                                                                                                                                                                                                                                                                                                                                                                                                                                                                                                                                                                                                                                                                                                                                                                                                                                                                                                                                                                                                                                                                                                                                                                                                                                                                                                                                                                                                                                                                                                                                                                                                                                                                                                                                                                                                                                                                                                                          |
| YP_616047        | Sala_0997        | beta-Ig-H3/fascinlin                       | 75.54%                   | 10                             |                                                                                                                                                                                                                                                                                                                                                                                                                                                                                                                                                                                                                                                                                                                                                                                                                                                                                                                                                                                                                                                                                                                                                                                                                                                                                                                                                                                                                                                                                                                                                                                                                                                                                                                                                                                                                                                                                                                                                                                                                          |
| YP_616054        | Sala_1004        | TonB-dependent receptor                    | 39.81%                   | 14                             |                                                                                                                                                                                                                                                                                                                                                                                                                                                                                                                                                                                                                                                                                                                                                                                                                                                                                                                                                                                                                                                                                                                                                                                                                                                                                                                                                                                                                                                                                                                                                                                                                                                                                                                                                                                                                                                                                                                                                                                                                          |
| YP_616064        | Sala_1014        | glycoside hydrolase, family 3-like protein | 14.90%                   | 8                              |                                                                                                                                                                                                                                                                                                                                                                                                                                                                                                                                                                                                                                                                                                                                                                                                                                                                                                                                                                                                                                                                                                                                                                                                                                                                                                                                                                                                                                                                                                                                                                                                                                                                                                                                                                                                                                                                                                                                                                                                                          |
| YP_616065        | Sala_1015        | TonB-dependent receptor                    | 39.96%                   | 25                             |                                                                                                                                                                                                                                                                                                                                                                                                                                                                                                                                                                                                                                                                                                                                                                                                                                                                                                                                                                                                                                                                                                                                                                                                                                                                                                                                                                                                                                                                                                                                                                                                                                                                                                                                                                                                                                                                                                                                                                                                                          |
| YP_616066        | Sala_1016        | hypothetical protein                       | 5.35%                    | 2                              |                                                                                                                                                                                                                                                                                                                                                                                                                                                                                                                                                                                                                                                                                                                                                                                                                                                                                                                                                                                                                                                                                                                                                                                                                                                                                                                                                                                                                                                                                                                                                                                                                                                                                                                                                                                                                                                                                                                                                                                                                          |
| YP_616074        | Sala_1024        | transcriptional regulator, LacI family     | 14.33%                   | 2                              |                                                                                                                                                                                                                                                                                                                                                                                                                                                                                                                                                                                                                                                                                                                                                                                                                                                                                                                                                                                                                                                                                                                                                                                                                                                                                                                                                                                                                                                                                                                                                                                                                                                                                                                                                                                                                                                                                                                                                                                                                          |
| YP_616077        | Sala_1027        | inosine-5'-monophosphate dehydrogenase     | 61.65%                   | 26                             |                                                                                                                                                                                                                                                                                                                                                                                                                                                                                                                                                                                                                                                                                                                                                                                                                                                                                                                                                                                                                                                                                                                                                                                                                                                                                                                                                                                                                                                                                                                                                                                                                                                                                                                                                                                                                                                                                                                                                                                                                          |

| Accession | Locus tag | Description                                    | Sequence coverage | No. peptides identified | List of peptides identified                                                                                                                                                                                                                                                                                                                                                                                                                                                                                                                                                                                                                                                                                                                                                                                                                                                                                                                                                                                                                                                                                                                                                                                                                                                                                                                                                                                                                                                                                                                                                                                                                                                                                                                                                                                                                                                                                                                                                                                                                                                                                                                                                                                                                                                                                                                                                                                                                                                                                                                                                                                                                                                                                                                                                                                                                                                                                                                                                                                                                                                                                                                                    |
|-----------|-----------|------------------------------------------------|-------------------|-------------------------|----------------------------------------------------------------------------------------------------------------------------------------------------------------------------------------------------------------------------------------------------------------------------------------------------------------------------------------------------------------------------------------------------------------------------------------------------------------------------------------------------------------------------------------------------------------------------------------------------------------------------------------------------------------------------------------------------------------------------------------------------------------------------------------------------------------------------------------------------------------------------------------------------------------------------------------------------------------------------------------------------------------------------------------------------------------------------------------------------------------------------------------------------------------------------------------------------------------------------------------------------------------------------------------------------------------------------------------------------------------------------------------------------------------------------------------------------------------------------------------------------------------------------------------------------------------------------------------------------------------------------------------------------------------------------------------------------------------------------------------------------------------------------------------------------------------------------------------------------------------------------------------------------------------------------------------------------------------------------------------------------------------------------------------------------------------------------------------------------------------------------------------------------------------------------------------------------------------------------------------------------------------------------------------------------------------------------------------------------------------------------------------------------------------------------------------------------------------------------------------------------------------------------------------------------------------------------------------------------------------------------------------------------------------------------------------------------------------------------------------------------------------------------------------------------------------------------------------------------------------------------------------------------------------------------------------------------------------------------------------------------------------------------------------------------------------------------------------------------------------------------------------------------------------|
| YP_616078 | Sala_1028 | Fmu (Sun)                                      | 40.91%            | 8                       | R.AQTGVAEEALIDFLDPLVGEHDSLLAR.A<br>R.IQTAEILDAIAAAAAR.E<br>R.ADLLETFFEGAPIGAPGWRR.L<br>R.LLHPGQEVAHLADWQGR.A<br>R.EGGAPADAILAEAMR.A<br>R.HPGWTADADYLPGVGR.A<br>R.AAMLALADAQGLALFDSYGPAPIADEPR.A<br>K.LIDLADLVAAPGGK.L                                                                                                                                                                                                                                                                                                                                                                                                                                                                                                                                                                                                                                                                                                                                                                                                                                                                                                                                                                                                                                                                                                                                                                                                                                                                                                                                                                                                                                                                                                                                                                                                                                                                                                                                                                                                                                                                                                                                                                                                                                                                                                                                                                                                                                                                                                                                                                                                                                                                                                                                                                                                                                                                                                                                                                                                                                                                                                                                          |
| YP_616079 | Sala_1029 | Tetratricopeptide TPR_2                        | 31.82%            | 3                       | R.SIALQQEQGR.A<br>R.IITLALAGLVASLPTASDAQR.A<br>R.EALLLEPNDIVALITGQGEALADK.G<br>R.LALPVAAGDDPNAAVYADAR.A<br>K.ILVQQLGDDIWR.L<br>R.TVAFGGVEIDLPSPGR.I<br>R.DTGPVVTGGAAR.R<br>R.QADJAALIDPGVK.I<br>R.LLWLGHLIGDHTDGHVDNLR.F<br>R.LHQSILGIER.L<br>R.DVAAFANAVHDDGGRGEEVR.L<br>K.NAATAIPDVEIQLSLATLQEVTR.E<br>K.TPVTAYAK.D<br>K.LGVPPNFNFSSGDDLDVGVEAGQK.A<br>K.GWVDYAGLDVK.G<br>K.NGGADQTIANGWIQLAK.A<br>K.ASFANDNIAKK.M<br>R.WTQDVPLVEITAK.N<br>R.TEVKSDVVFVGYGNAPEK.G<br>R.QGAAALVLDHTEPAAYGWVWVSSNTGTQYLAESK.N<br>K.YREAGLQPNNGR.W<br>K.RPDEVLTYGHWDLGR.C<br>R.YHAPDDEYEAITNWEGMMSDLR.L<br>R.WSYKYEEAAR.Q<br>R.MLAMTDWPNWNEGDEFR.A<br>R.ESSDAYECRAPGTAGEEK.T<br>R.ESSDAYEGR.A<br>K.ELFASAGQDFDKL.R.E<br>K.ASFANDNIAK.K<br>R.SIVFLAVTAESGLGSK.Y<br>K.SELDAYVEK.L<br>K.DYVAFYSR.V<br>K.DSDVVFVGYGNAPEK.G<br>K.YYAEVFPVLSQTVGGVMMDALNAVGPADIVVVGAGK.S<br>K.YYAEVFPVLSQTVGGVMMDALNAVGPAD.D<br>K.TVVLVNDPDPENRETEGPNRGR.A<br>R.CTPVDGDDICNVAGVNDASGIAGLVTLAK.A<br>R.APPTAGEEK.T<br>K.AKELFASAGQDFDKL.L<br>R.LYYAAGR.M<br>R.EAGLQPNNGR.W<br>K.NATLTFGGK.T<br>K.GFKPVLAVGK.A<br>K.AAEDYKKNR.Y<br>R.YHAPDDEYEAITNWEGMMSDLR.LYAAGR.M<br>R.SDHSFAK.L<br>R.NVIGVLPGAK.R<br>K.TVVLVNDPDPENRE.E<br>K.DSDVVFVGYGNAPEKGVNDYAGLDVK.G<br>R.AYSIASPAYADELEFLSIK.V<br>R.LQLIQDGPVYLSGR.K<br>R.DALESQLAGDPLVQDQALLQHYLPTVTR.E<br>R.AYSIASPAYADELEFLSIKVPDPPLTSR.L<br>R.IDALIDGGQFLGHLTPAHFDPATDR.V<br>R.EGSNAAPGDFVIER.A<br>R.KPTGTLVADALPGQR.L<br>R.LFLSTGTGLAPPLSLVRDPDIYER.F<br>R.LFLSTGTGLAPPLSLVR.D<br>R.SGEFVMIGLPGEGR.P<br>K.LAPSASLTVENR.S<br>R.FSQQLVHCVR.Q<br>R.SIDIDVGGDTDEERPI.<br>R.IDDNPVGVAR.A<br>K.TGGLGPLWPTGDFR.A<br>R.TGFYQIALGAK.V<br>K.VPQDGAFLINPYGMHFSEVASSLIK.I<br>K.IDIDGNKLDENPWHVNK.A<br>K.YSEAEWTAAR.Q<br>R.WDELINFTVTK.V<br>R.DNVDQALR.A<br>R.HYKPSER.K<br>.MQIIVRDNVVDQALR.A<br>R.VGGQLSGIAR.Y<br>R.DLPPGHPLAAQPNVWPAIEGFR.A<br>R.LLHYPPVEAPAK.G<br>R.AYHHPGSGGAR.G<br>R.YLGLAPDFDDTVK.D<br>K.AFFALPEAVK.R<br>R.AEAHEDINTTLTGAEAGEGLELIDK.D<br>K.EVDLKEFWHVGR.D<br>R.YMSPFLHFR.S<br>R.YLGLAPDFDFTVKDGVSMVR.L<br>R.LFAEFDVGGQLSGIAR.Y<br>R.DFGGSFER.F<br>K.AFFALPEAVK.R<br>K.SEPDAYAWQLVK.D<br>R.VTFTEWQLIK.M<br>K.DITGIVDWGR.N<br>K.GDEALFYHSNIGK.E<br>K.QYLALIDVPAADGGDITDLPLAK.T<br>R.VFLDGEALVDPKAGLVPDAPR.D<br>R.VHAIEGLGFLAGDPPYVGR.G<br>K.SICGVVFGQSER.A<br>K.PDSADMTDQRAAAMSFYLR.D<br>K.LAASPLHALGLR.A<br>R.NLHTDLDDGVKIV.V<br>K.VFAVEPEASVIVGGQPAPHPIQIGAGFIPR.N<br>R.VLGFNYDTGER.Y<br>R.IGLAMIEAAER.D<br>K.EGGTIVEPTSIGNTGIGLMAAAVK.G<br>K.ANSLETIGNTPHIR.M<br>R.YLSPDFLPEI.<br>R.AATEEGMLVGISSGATLAAIAQK.L<br>R.TTGPDELADR.D<br>R.RAATEEGMLVGISSGATLAAIAQK.L<br>K.LVLPMESSSLER.R<br>R.DGSLKEGGTIVEPTSIGNTGIGLMAAAVK.G<br>R.AIELVETTPGAWMPQQFENEANIDVHIR.T<br>K.LFPDAEVDVW.S<br>R.NLHTDLDDGVKIVDASAAK.D<br>R.LMLAYGATDLTPR.E<br>R.SNPGSISKDR.I<br>.MKANSLETIGNTPHIR.M<br>R.IGLAMIEAAER.D<br>R.AIELVETTPGAWMPQQFENEANIDVHIR.T<br>R.IGLAMIEAAERDGLSK.E<br>R.DGSLKEGGTIVEPTSIGNTGIGLMAAAVK.G<br>R.AATEEGMLVGISSGATLAAIAQK.L<br>K.LFPDAEVDVW.K.S<br>R.AFAVAIAEALR.W<br>R.TLPGQIADAGLDGFFIAR.L<br>K.LINPVVYAIR.R<br>K.FDEGDALFVGGQPSDQVK.A<br>K.ADLINDGEVAIQEGNDKPYIYR.G<br>R.GFQVDEWKL.R.E<br>K.DLTPSSVDHADFHAR.P<br>R.RYPFLAK.L<br>R.EVFAEQVK.S |
| YP_616080 | Sala_1030 | Porphyrinomas-type peptidyl-arginine deiminase | 38.84%            | 8                       | R.LALPVAAGDDPNAAVYADAR.A<br>K.ILVQQLGDDIWR.L<br>R.TVAFGGVEIDLPSPGR.I<br>R.DTGPVVTGGAAR.R<br>R.QADJAALIDPGVK.I<br>R.LLWLGHLIGDHTDGHVDNLR.F<br>R.LHQSILGIER.L<br>R.DVAAFANAVHDDGGRGEEVR.L<br>K.NAATAIPDVEIQLSLATLQEVTR.E<br>K.TPVTAYAK.D<br>K.LGVPPNFNFSSGDDLDVGVEAGQK.A<br>K.GWVDYAGLDVK.G<br>K.NGGADQTIANGWIQLAK.A<br>K.ASFANDNIAKK.M<br>R.WTQDVPLVEITAK.N<br>R.TEVKSDVVFVGYGNAPEK.G<br>R.QGAAALVLDHTEPAAYGWVWVSSNTGTQYLAESK.N<br>K.YREAGLQPNNGR.W<br>K.RPDEVLTYGHWDLGR.C<br>R.YHAPDDEYEAITNWEGMMSDLR.L<br>R.WSYKYEEAAR.Q<br>R.MLAMTDWPNWNEGDEFR.A<br>R.ESSDAYECRAPGTAGEEK.T<br>R.ESSDAYEGR.A<br>K.ELFASAGQDFDKL.R.E<br>K.ASFANDNIAK.K<br>R.SIVFLAVTAESGLGSK.Y<br>K.SELDAYVEK.L<br>K.DYVAFYSR.V<br>K.DSDVVFVGYGNAPEK.G<br>K.YYAEVFPVLSQTVGGVMMDALNAVGPADIVVVGAGK.S<br>K.YYAEVFPVLSQTVGGVMMDALNAVGPAD.D<br>K.TVVLVNDPDPENRETEGPNRGR.A<br>R.CTPVDGDDICNVAGVNDASGIAGLVTLAK.A<br>R.APPTAGEEK.T<br>K.AKELFASAGQDFDKL.L<br>R.LYYAAGR.M<br>R.EAGLQPNNGR.W<br>K.NATLTFGGK.T<br>K.GFKPVLAVGK.A<br>K.AAEDYKKNR.Y<br>R.YHAPDDEYEAITNWEGMMSDLR.LYAAGR.M<br>R.SDHSFAK.L<br>R.NVIGVLPGAK.R<br>K.TVVLVNDPDPENRE.E<br>K.DSDVVFVGYGNAPEKGVNDYAGLDVK.G<br>R.AYSIASPAYADELEFLSIK.V<br>R.LQLIQDGPVYLSGR.K<br>R.DALESQLAGDPLVQDQALLQHYLPTVTR.E<br>R.AYSIASPAYADELEFLSIKVPDPPLTSR.L<br>R.IDALIDGGQFLGHLTPAHFDPATDR.V<br>R.EGSNAAPGDFVIER.A<br>R.KPTGTLVADALPGQR.L<br>R.LFLSTGTGLAPPLSLVRDPDIYER.F<br>R.LFLSTGTGLAPPLSLVR.D<br>R.SGEFVMIGLPGEGR.P<br>K.LAPSASLTVENR.S<br>R.FSQQLVHCVR.Q<br>R.SIDIDVGGDTDEERPI.<br>R.IDDNPVGVAR.A<br>K.TGGLGPLWPTGDFR.A<br>R.TGFYQIALGAK.V<br>K.VPQDGAFLINPYGMHFSEVASSLIK.I<br>K.IDIDGNKLDENPWHVNK.A<br>K.YSEAEWTAAR.Q<br>R.WDELINFTVTK.V<br>R.DNVDQALR.A<br>R.HYKPSER.K<br>.MQIIVRDNVVDQALR.A<br>R.VGGQLSGIAR.Y<br>R.DLPPGHPLAAQPNVWPAIEGFR.A<br>R.LLHYPPVEAPAK.G<br>R.AYHHPGSGGAR.G<br>R.YLGLAPDFDDTVK.D<br>K.AFFALPEAVK.R<br>R.AEAHEDINTTLTGAEAGEGLELIDK.D<br>K.EVDLKEFWHVGR.D<br>R.YMSPFLHFR.S<br>R.YLGLAPDFDFTVKDGVSMVR.L<br>R.LFAEFDVGGQLSGIAR.Y<br>R.DFGGSFER.F<br>K.AFFALPEAVK.R<br>K.SEPDAYAWQLVK.D<br>R.VTFTEWQLIK.M<br>K.DITGIVDWGR.N<br>K.GDEALFYHSNIGK.E<br>K.QYLALIDVPAADGGDITDLPLAK.T<br>R.VFLDGEALVDPKAGLVPDAPR.D<br>R.VHAIEGLGFLAGDPPYVGR.G<br>K.SICGVVFGQSER.A<br>K.PDSADMTDQRAAAMSFYLR.D<br>K.LAASPLHALGLR.A<br>R.NLHTDLDDGVKIV.V<br>K.VFAVEPEASVIVGGQPAPHPIQIGAGFIPR.N<br>R.VLGFNYDTGER.Y<br>R.IGLAMIEAAER.D<br>K.EGGTIVEPTSIGNTGIGLMAAAVK.G<br>K.ANSLETIGNTPHIR.M<br>R.YLSPDFLPEI.<br>R.AATEEGMLVGISSGATLAAIAQK.L<br>R.TTGPDELADR.D<br>R.RAATEEGMLVGISSGATLAAIAQK.L<br>K.LVLPMESSSLER.R<br>R.DGSLKEGGTIVEPTSIGNTGIGLMAAAVK.G<br>R.AIELVETTPGAWMPQQFENEANIDVHIR.T<br>K.LFPDAEVDVW.S<br>R.NLHTDLDDGVKIVDASAAK.D<br>R.LMLAYGATDLTPR.E<br>R.SNPGSISKDR.I<br>.MKANSLETIGNTPHIR.M<br>R.IGLAMIEAAER.D<br>R.AIELVETTPGAWMPQQFENEANIDVHIR.T<br>R.IGLAMIEAAERDGLSK.E<br>R.DGSLKEGGTIVEPTSIGNTGIGLMAAAVK.G<br>R.AATEEGMLVGISSGATLAAIAQK.L<br>K.LFPDAEVDVW.K.S<br>R.AFAVAIAEALR.W<br>R.TLPGQIADAGLDGFFIAR.L<br>K.LINPVVYAIR.R<br>K.FDEGDALFVGGQPSDQVK.A<br>K.ADLINDGEVAIQEGNDKPYIYR.G<br>R.GFQVDEWKL.R.E<br>K.DLTPSSVDHADFHAR.P<br>R.RYPFLAK.L<br>R.EVFAEQVK.S                                                                                |
| YP_616081 | Sala_1031 | peptidase M28                                  | 86.86%            | 38                      | R.LALPVAAGDDPNAAVYADAR.A<br>K.ILVQQLGDDIWR.L<br>R.TVAFGGVEIDLPSPGR.I<br>R.DTGPVVTGGAAR.R<br>R.QADJAALIDPGVK.I<br>R.LLWLGHLIGDHTDGHVDNLR.F<br>R.LHQSILGIER.L<br>R.DVAAFANAVHDDGGRGEEVR.L<br>K.NAATAIPDVEIQLSLATLQEVTR.E<br>K.TPVTAYAK.D<br>K.LGVPPNFNFSSGDDLDVGVEAGQK.A<br>K.GWVDYAGLDVK.G<br>K.NGGADQTIANGWIQLAK.A<br>K.ASFANDNIAKK.M<br>R.WTQDVPLVEITAK.N<br>R.TEVKSDVVFVGYGNAPEK.G<br>R.QGAAALVLDHTEPAAYGWVWVSSNTGTQYLAESK.N<br>K.YREAGLQPNNGR.W<br>K.RPDEVLTYGHWDLGR.C<br>R.YHAPDDEYEAITNWEGMMSDLR.L<br>R.WSYKYEEAAR.Q<br>R.MLAMTDWPNWNEGDEFR.A<br>R.ESSDAYECRAPGTAGEEK.T<br>R.ESSDAYEGR.A<br>K.ELFASAGQDFDKL.R.E<br>K.ASFANDNIAK.K<br>R.SIVFLAVTAESGLGSK.Y<br>K.SELDAYVEK.L<br>K.DYVAFYSR.V<br>K.DSDVVFVGYGNAPEK.G<br>K.YYAEVFPVLSQTVGGVMMDALNAVGPADIVVVGAGK.S<br>K.YYAEVFPVLSQTVGGVMMDALNAVGPAD.D<br>K.TVVLVNDPDPENRETEGPNRGR.A<br>R.CTPVDGDDICNVAGVNDASGIAGLVTLAK.A<br>R.APPTAGEEK.T<br>K.AKELFASAGQDFDKL.L<br>R.LYYAAGR.M<br>R.EAGLQPNNGR.W<br>K.NATLTFGGK.T<br>K.GFKPVLAVGK.A<br>K.AAEDYKKNR.Y<br>R.YHAPDDEYEAITNWEGMMSDLR.LYAAGR.M<br>R.SDHSFAK.L<br>R.NVIGVLPGAK.R<br>K.TVVLVNDPDPENRE.E<br>K.DSDVVFVGYGNAPEKGVNDYAGLDVK.G<br>R.AYSIASPAYADELEFLSIK.V<br>R.LQLIQDGPVYLSGR.K<br>R.DALESQLAGDPLVQDQALLQHYLPTVTR.E<br>R.AYSIASPAYADELEFLSIKVPDPPLTSR.L<br>R.IDALIDGGQFLGHLTPAHFDPATDR.V<br>R.EGSNAAPGDFVIER.A<br>R.KPTGTLVADALPGQR.L<br>R.LFLSTGTGLAPPLSLVRDPDIYER.F<br>R.LFLSTGTGLAPPLSLVR.D<br>R.SGEFVMIGLPGEGR.P<br>K.LAPSASLTVENR.S<br>R.FSQQLVHCVR.Q<br>R.SIDIDVGGDTDEERPI.<br>R.IDDNPVGVAR.A<br>K.TGGLGPLWPTGDFR.A<br>R.TGFYQIALGAK.V<br>K.VPQDGAFLINPYGMHFSEVASSLIK.I<br>K.IDIDGNKLDENPWHVNK.A<br>K.YSEAEWTAAR.Q<br>R.WDELINFTVTK.V<br>R.DNVDQALR.A<br>R.HYKPSER.K<br>.MQIIVRDNVVDQALR.A<br>R.VGGQLSGIAR.Y<br>R.DLPPGHPLAAQPNVWPAIEGFR.A<br>R.LLHYPPVEAPAK.G<br>R.AYHHPGSGGAR.G<br>R.YLGLAPDFDDTVK.D<br>K.AFFALPEAVK.R<br>R.AEAHEDINTTLTGAEAGEGLELIDK.D<br>K.EVDLKEFWHVGR.D<br>R.YMSPFLHFR.S<br>R.YLGLAPDFDFTVKDGVSMVR.L<br>R.LFAEFDVGGQLSGIAR.Y<br>R.DFGGSFER.F<br>K.AFFALPEAVK.R<br>K.SEPDAYAWQLVK.D<br>R.VTFTEWQLIK.M<br>K.DITGIVDWGR.N<br>K.GDEALFYHSNIGK.E<br>K.QYLALIDVPAADGGDITDLPLAK.T<br>R.VFLDGEALVDPKAGLVPDAPR.D<br>R.VHAIEGLGFLAGDPPYVGR.G<br>K.SICGVVFGQSER.A<br>K.PDSADMTDQRAAAMSFYLR.D<br>K.LAASPLHALGLR.A<br>R.NLHTDLDDGVKIV.V<br>K.VFAVEPEASVIVGGQPAPHPIQIGAGFIPR.N<br>R.VLGFNYDTGER.Y<br>R.IGLAMIEAAER.D<br>K.EGGTIVEPTSIGNTGIGLMAAAVK.G<br>K.ANSLETIGNTPHIR.M<br>R.YLSPDFLPEI.<br>R.AATEEGMLVGISSGATLAAIAQK.L<br>R.TTGPDELADR.D<br>R.RAATEEGMLVGISSGATLAAIAQK.L<br>K.LVLPMESSSLER.R<br>R.DGSLKEGGTIVEPTSIGNTGIGLMAAAVK.G<br>R.AIELVETTPGAWMPQQFENEANIDVHIR.T<br>K.LFPDAEVDVW.S<br>R.NLHTDLDDGVKIVDASAAK.D<br>R.LMLAYGATDLTPR.E<br>R.SNPGSISKDR.I<br>.MKANSLETIGNTPHIR.M<br>R.IGLAMIEAAER.D<br>R.AIELVETTPGAWMPQQFENEANIDVHIR.T<br>R.IGLAMIEAAERDGLSK.E<br>R.DGSLKEGGTIVEPTSIGNTGIGLMAAAVK.G<br>R.AATEEGMLVGISSGATLAAIAQK.L<br>K.LFPDAEVDVW.K.S<br>R.AFAVAIAEALR.W<br>R.TLPGQIADAGLDGFFIAR.L<br>K.LINPVVYAIR.R<br>K.FDEGDALFVGGQPSDQVK.A<br>K.ADLINDGEVAIQEGNDKPYIYR.G<br>R.GFQVDEWKL.R.E<br>K.DLTPSSVDHADFHAR.P<br>R.RYPFLAK.L<br>R.EVFAEQVK.S                                                                                |
| YP_616082 | Sala_1032 | oxidoreductase FAD/NAD(P)-binding              | 70.48%            | 12                      | R.AYSIASPAYADELEFLSIK.V<br>R.LQLIQDGPVYLSGR.K<br>R.DALESQLAGDPLVQDQALLQHYLPTVTR.E<br>R.AYSIASPAYADELEFLSIKVPDPPLTSR.L<br>R.IDALIDGGQFLGHLTPAHFDPATDR.V<br>R.EGSNAAPGDFVIER.A<br>R.KPTGTLVADALPGQR.L<br>R.LFLSTGTGLAPPLSLVRDPDIYER.F<br>R.LFLSTGTGLAPPLSLVR.D<br>R.SGEFVMIGLPGEGR.P<br>K.LAPSASLTVENR.S<br>R.FSQQLVHCVR.Q<br>R.SIDIDVGGDTDEERPI.<br>R.IDDNPVGVAR.A<br>K.TGGLGPLWPTGDFR.A<br>R.TGFYQIALGAK.V<br>K.VPQDGAFLINPYGMHFSEVASSLIK.I<br>K.IDIDGNKLDENPWHVNK.A<br>K.YSEAEWTAAR.Q<br>R.WDELINFTVTK.V<br>R.DNVDQALR.A<br>R.HYKPSER.K<br>.MQIIVRDNVVDQALR.A<br>R.VGGQLSGIAR.Y<br>R.DLPPGHPLAAQPNVWPAIEGFR.A<br>R.LLHYPPVEAPAK.G<br>R.AYHHPGSGGAR.G<br>R.YLGLAPDFDDTVK.D<br>K.AFFALPEAVK.R<br>R.AEAHEDINTTLTGAEAGEGLELIDK.D<br>K.EVDLKEFWHVGR.D<br>R.YMSPFLHFR.S<br>R.YLGLAPDFDFTVKDGVSMVR.L<br>R.LFAEFDVGGQLSGIAR.Y<br>R.DFGGSFER.F<br>K.AFFALPEAVK.R<br>K.SEPDAYAWQLVK.D<br>R.VTFTEWQLIK.M<br>K.DITGIVDWGR.N<br>K.GDEALFYHSNIGK.E<br>K.QYLALIDVPAADGGDITDLPLAK.T<br>R.VFLDGEALVDPKAGLVPDAPR.D<br>R.VHAIEGLGFLAGDPPYVGR.G<br>K.SICGVVFGQSER.A<br>K.PDSADMTDQRAAAMSFYLR.D<br>K.LAASPLHALGLR.A<br>R.NLHTDLDDGVKIV.V<br>K.VFAVEPEASVIVGGQPAPHPIQIGAGFIPR.N<br>R.VLGFNYDTGER.Y<br>R.IGLAMIEAAER.D<br>K.EGGTIVEPTSIGNTGIGLMAAAVK.G<br>K.ANSLETIGNTPHIR.M<br>R.YLSPDFLPEI.<br>R.AATEEGMLVGISSGATLAAIAQK.L<br>R.TTGPDELADR.D<br>R.RAATEEGMLVGISSGATLAAIAQK.L<br>K.LVLPMESSSLER.R<br>R.DGSLKEGGTIVEPTSIGNTGIGLMAAAVK.G<br>R.AIELVETTPGAWMPQQFENEANIDVHIR.T<br>K.LFPDAEVDVW.S<br>R.NLHTDLDDGVKIVDASAAK.D<br>R.LMLAYGATDLTPR.E<br>R.SNPGSISKDR.I<br>.MKANSLETIGNTPHIR.M<br>R.IGLAMIEAAER.D<br>R.AIELVETTPGAWMPQQFENEANIDVHIR.T<br>R.IGLAMIEAAERDGLSK.E<br>R.DGSLKEGGTIVEPTSIGNTGIGLMAAAVK.G<br>R.AATEEGMLVGISSGATLAAIAQK.L<br>K.LFPDAEVDVW.K.S<br>R.AFAVAIAEALR.W<br>R.TLPGQIADAGLDGFFIAR.L<br>K.LINPVVYAIR.R<br>K.FDEGDALFVGGQPSDQVK.A<br>K.ADLINDGEVAIQEGNDKPYIYR.G<br>R.GFQVDEWKL.R.E<br>K.DLTPSSVDHADFHAR.P<br>R.RYPFLAK.L<br>R.EVFAEQVK.S                                                                                                                                                                                                                                                                                                                                                                                                                                                                                                                                                                                                                                                                                                                                                                                                                                                                                                                                                                                                                                                                                                                                                                                                                        |
| YP_616083 | Sala_1033 | phospholipid/glycerol acyltransferase          | 25.24%            | 4                       | R.SIDIDVGGDTDEERPI.<br>R.IDDNPVGVAR.A<br>K.TGGLGPLWPTGDFR.A<br>R.TGFYQIALGAK.V<br>K.VPQDGAFLINPYGMHFSEVASSLIK.I<br>K.IDIDGNKLDENPWHVNK.A<br>K.YSEAEWTAAR.Q<br>R.WDELINFTVTK.V<br>R.DNVDQALR.A<br>R.HYKPSER.K<br>.MQIIVRDNVVDQALR.A<br>R.VGGQLSGIAR.Y<br>R.DLPPGHPLAAQPNVWPAIEGFR.A<br>R.LLHYPPVEAPAK.G<br>R.AYHHPGSGGAR.G<br>R.YLGLAPDFDDTVK.D<br>K.AFFALPEAVK.R<br>R.AEAHEDINTTLTGAEAGEGLELIDK.D<br>K.EVDLKEFWHVGR.D<br>R.YMSPFLHFR.S<br>R.YLGLAPDFDFTVKDGVSMVR.L<br>R.LFAEFDVGGQLSGIAR.Y<br>R.DFGGSFER.F<br>K.AFFALPEAVK.R<br>K.SEPDAYAWQLVK.D<br>R.VTFTEWQLIK.M<br>K.DITGIVDWGR.N<br>K.GDEALFYHSNIGK.E<br>K.QYLALIDVPAADGGDITDLPLAK.T<br>R.VFLDGEALVDPKAGLVPDAPR.D<br>R.VHAIEGLGFLAGDPPYVGR.G<br>K.SICGVVFGQSER.A<br>K.PDSADMTDQRAAAMSFYLR.D<br>K.LAASPLHALGLR.A<br>R.NLHTDLDDGVKIV.V<br>K.VFAVEPEASVIVGGQPAPHPIQIGAGFIPR.N<br>R.VLGFNYDTGER.Y<br>R.IGLAMIEAAER.D<br>K.EGGTIVEPTSIGNTGIGLMAAAVK.G<br>K.ANSLETIGNTPHIR.M<br>R.YLSPDFLPEI.<br>R.AATEEGMLVGISSGATLAAIAQK.L<br>R.TTGPDELADR.D<br>R.RAATEEGMLVGISSGATLAAIAQK.L<br>K.LVLPMESSSLER.R<br>R.DGSLKEGGTIVEPTSIGNTGIGLMAAAVK.G<br>R.AIELVETTPGAWMPQQFENEANIDVHIR.T<br>K.LFPDAEVDVW.S<br>R.NLHTDLDDGVKIVDASAAK.D<br>R.LMLAYGATDLTPR.E<br>R.SNPGSISKDR.I<br>.MKANSLETIGNTPHIR.M<br>R.IGLAMIEAAER.D<br>R.AIELVETTPGAWMPQQFENEANIDVHIR.T<br>R.IGLAMIEAAERDGLSK.E<br>R.DGSLKEGGTIVEPTSIGNTGIGLMAAAVK.G<br>R.AATEEGMLVGISSGATLAAIAQK.L<br>K.LFPDAEVDVW.K.S<br>R.AFAVAIAEALR.W<br>R.TLPGQIADAGLDGFFIAR.L<br>K.LINPVVYAIR.R<br>K.FDEGDALFVGGQPSDQVK.A<br>K.ADLINDGEVAIQEGNDKPYIYR.G<br>R.GFQVDEWKL.R.E<br>K.DLTPSSVDHADFHAR.P<br>R.RYPFLAK.L<br>R.EVFAEQVK.S                                                                                                                                                                                                                                                                                                                                                                                                                                                                                                                                                                                                                                                                                                                                                                                                                                                                                                                                                                                                                                                                                                                                                                                                                                                                                                                                                                                                                                                                                                                                                    |
| YP_616088 | Sala_1038 | class II aldolase/adducin-like protein         | 25.98%            | 5                       | K.VPQDGAFLINPYGMHFSEVASSLIK.I<br>K.IDIDGNKLDENPWHVNK.A<br>K.YSEAEWTAAR.Q<br>R.WDELINFTVTK.V<br>R.DNVDQALR.A<br>R.HYKPSER.K<br>.MQIIVRDNVVDQALR.A<br>R.VGGQLSGIAR.Y<br>R.DLPPGHPLAAQPNVWPAIEGFR.A<br>R.LLHYPPVEAPAK.G<br>R.AYHHPGSGGAR.G<br>R.YLGLAPDFDDTVK.D<br>K.AFFALPEAVK.R<br>R.AEAHEDINTTLTGAEAGEGLELIDK.D<br>K.EVDLKEFWHVGR.D<br>R.YMSPFLHFR.S<br>R.YLGLAPDFDFTVKDGVSMVR.L<br>R.LFAEFDVGGQLSGIAR.Y<br>R.DFGGSFER.F<br>K.AFFALPEAVK.R<br>K.SEPDAYAWQLVK.D<br>R.VTFTEWQLIK.M<br>K.DITGIVDWGR.N<br>K.GDEALFYHSNIGK.E<br>K.QYLALIDVPAADGGDITDLPLAK.T<br>R.VFLDGEALVDPKAGLVPDAPR.D<br>R.VHAIEGLGFLAGDPPYVGR.G<br>K.SICGVVFGQSER.A<br>K.PDSADMTDQRAAAMSFYLR.D<br>K.LAASPLHALGLR.A<br>R.NLHTDLDDGVKIV.V<br>K.VFAVEPEASVIVGGQPAPHPIQIGAGFIPR.N<br>R.VLGFNYDTGER.Y<br>R.IGLAMIEAAER.D<br>K.EGGTIVEPTSIGNTGIGLMAAAVK.G<br>K.ANSLETIGNTPHIR.M<br>R.YLSPDFLPEI.<br>R.AATEEGMLVGISSGATLAAIAQK.L<br>R.TTGPDELADR.D<br>R.RAATEEGMLVGISSGATLAAIAQK.L<br>K.LVLPMESSSLER.R<br>R.DGSLKEGGTIVEPTSIGNTGIGLMAAAVK.G<br>R.AIELVETTPGAWMPQQFENEANIDVHIR.T<br>K.LFPDAEVDVW.S<br>R.NLHTDLDDGVKIVDASAAK.D<br>R.LMLAYGATDLTPR.E<br>R.SNPGSISKDR.I<br>.MKANSLETIGNTPHIR.M<br>R.IGLAMIEAAER.D<br>R.AIELVETTPGAWMPQQFENEANIDVHIR.T<br>R.IGLAMIEAAERDGLSK.E<br>R.DGSLKEGGTIVEPTSIGNTGIGLMAAAVK.G<br>R.AATEEGMLVGISSGATLAAIAQK.L<br>K.LFPDAEVDVW.K.S<br>R.AFAVAIAEALR.W<br>R.TLPGQIADAGLDGFFIAR.L<br>K.LINPVVYAIR.R<br>K.FDEGDALFVGGQPSDQVK.A<br>K.ADLINDGEVAIQEGNDKPYIYR.G<br>R.GFQVDEWKL.R.E<br>K.DLTPSSVDHADFHAR.P<br>R.RYPFLAK.L<br>R.EVFAEQVK.S                                                                                                                                                                                                                                                                                                                                                                                                                                                                                                                                                                                                                                                                                                                                                                                                                                                                                                                                                                                                                                                                                                                                                                                                                                                                                                                                                                                                                                                                                                                                                                                                                                      |
| YP_616089 | Sala_1039 | ribosomal protein S21                          | 33.82%            | 3                       | R.WDELINFTVTK.V<br>R.DNVDQALR.A<br>R.HYKPSER.K<br>.MQIIVRDNVVDQALR.A<br>R.VGGQLSGIAR.Y<br>R.DLPPGHPLAAQPNVWPAIEGFR.A<br>R.LLHYPPVEAPAK.G<br>R.AYHHPGSGGAR.G<br>R.YLGLAPDFDDTVK.D<br>K.AFFALPEAVK.R<br>R.AEAHEDINTTLTGAEAGEGLELIDK.D<br>K.EVDLKEFWHVGR.D<br>R.YMSPFLHFR.S<br>R.YLGLAPDFDFTVKDGVSMVR.L<br>R.LFAEFDVGGQLSGIAR.Y<br>R.DFGGSFER.F<br>K.AFFALPEAVK.R<br>K.SEPDAYAWQLVK.D<br>R.VTFTEWQLIK.M<br>K.DITGIVDWGR.N<br>K.GDEALFYHSNIGK.E<br>K.QYLALIDVPAADGGDITDLPLAK.T<br>R.VFLDGEALVDPKAGLVPDAPR.D<br>R.VHAIEGLGFLAGDPPYVGR.G<br>K.SICGVVFGQSER.A<br>K.PDSADMTDQRAAAMSFYLR.D<br>K.LAASPLHALGLR.A<br>R.NLHTDLDDGVKIV.V<br>K.VFAVEPEASVIVGGQPAPHPIQIGAGFIPR.N<br>R.VLGFNYDTGER.Y<br>R.IGLAMIEAAER.D<br>K.EGGTIVEPTSIGNTGIGLMAAAVK.G<br>K.ANSLETIGNTPHIR.M<br>R.YLSPDFLPEI.<br>R.AATEEGMLVGISSGATLAAIAQK.L<br>R.TTGPDELADR.D<br>R.RAATEEGMLVGISSGATLAAIAQK.L<br>K.LVLPMESSSLER.R<br>R.DGSLKEGGTIVEPTSIGNTGIGLMAAAVK.G<br>R.AIELVETTPGAWMPQQFENEANIDVHIR.T<br>K.LFPDAEVDVW.S<br>R.NLHTDLDDGVKIVDASAAK.D<br>R.LMLAYGATDLTPR.E<br>R.SNPGSISKDR.I<br>.MKANSLETIGNTPHIR.M<br>R.IGLAMIEAAER.D<br>R.AIELVETTPGAWMPQQFENEANIDVHIR.T<br>R.IGLAMIEAAERDGLSK.E<br>R.DGSLKEGGTIVEPTSIGNTGIGLMAAAVK.G<br>R.AATEEGMLVGISSGATLAAIAQK.L<br>K.LFPDAEVDVW.K.S<br>R.AFAVAIAEALR.W<br>R.TLPGQIADAGLDGFFIAR.L<br>K.LINPVVYAIR.R<br>K.FDEGDALFVGGQPSDQVK.A<br>K.ADLINDGEVAIQEGNDKPYIYR.G<br>R.GFQVDEWKL.R.E<br>K.DLTPSSVDHADFHAR.P<br>R.RYPFLAK.L<br>R.EVFAEQVK.S                                                                                                                                                                                                                                                                                                                                                                                                                                                                                                                                                                                                                                                                                                                                                                                                                                                                                                                                                                                                                                                                                                                                                                                                                                                                                                                                                                                                                                                                                                                                                                                                                                                                                                                  |
| YP_616090 | Sala_1040 | ZOG-Fe(II) oxygenase                           | 49.84%            | 13                      | R.VGGQLSGIAR.Y<br>R.DLPPGHPLAAQPNVWPAIEGFR.A<br>R.LLHYPPVEAPAK.G<br>R.AYHHPGSGGAR.G<br>R.YLGLAPDFDDTVK.D<br>K.AFFALPEAVK.R<br>R.AEAHEDINTTLTGAEAGEGLELIDK.D<br>K.EVDLKEFWHVGR.D<br>R.YMSPFLHFR.S<br>R.YLGLAPDFDFTVKDGVSMVR.L<br>R.LFAEFDVGGQLSGIAR.Y<br>R.DFGGSFER.F<br>K.AFFALPEAVK.R<br>K.SEPDAYAWQLVK.D<br>R.VTFTEWQLIK.M<br>K.DITGIVDWGR.N<br>K.GDEALFYHSNIGK.E<br>K.QYLALIDVPAADGGDITDLPLAK.T<br>R.VFLDGEALVDPKAGLVPDAPR.D<br>R.VHAIEGLGFLAGDPPYVGR.G<br>K.SICGVVFGQSER.A<br>K.PDSADMTDQRAAAMSFYLR.D<br>K.LAASPLHALGLR.A<br>R.NLHTDLDDGVKIV.V<br>K.VFAVEPEASVIVGGQPAPHPIQIGAGFIPR.N<br>R.VLGFNYDTGER.Y<br>R.IGLAMIEAAER.D<br>K.EGGTIVEPTSIGNTGIGLMAAAVK.G<br>K.ANSLETIGNTPHIR.M<br>R.YLSPDFLPEI.<br>R.AATEEGMLVGISSGATLAAIAQK.L<br>R.TTGPDELADR.D<br>R.RAATEEGMLVGISSGATLAAIAQK.L<br>K.LVLPMESSSLER.R<br>R.DGSLKEGGTIVEPTSIGNTGIGLMAAAVK.G<br>R.AIELVETTPGAWMPQQFENEANIDVHIR.T<br>K.LFPDAEVDVW.S<br>R.NLHTDLDDGVKIVDASAAK.D<br>R.LMLAYGATDLTPR.E<br>R.SNPGSISKDR.I<br>.MKANSLETIGNTPHIR.M<br>R.IGLAMIEAAER.D<br>R.AIELVETTPGAWMPQQFENEANIDVHIR.T<br>R.IGLAMIEAAERDGLSK.E<br>R.DGSLKEGGTIVEPTSIGNTGIGLMAAAVK.G<br>R.AATEEGMLVGISSGATLAAIAQK.L<br>K.LFPDAEVDVW.K.S<br>R.AFAVAIAEALR.W<br>R.TLPGQIADAGLDGFFIAR.L<br>K.LINPVVYAIR.R<br>K.FDEGDALFVGGQPSDQVK.A<br>K.ADLINDGEVAIQEGNDKPYIYR.G<br>R.GFQVDEWKL.R.E<br>K.DLTPSSVDHADFHAR.P<br>R.RYPFLAK.L<br>R.EVFAEQVK.S                                                                                                                                                                                                                                                                                                                                                                                                                                                                                                                                                                                                                                                                                                                                                                                                                                                                                                                                                                                                                                                                                                                                                                                                                                                                                                                                                                                                                                                                                                                                                                                                                                                                                                                                                                                          |
| YP_616091 | Sala_1041 | protein of unknown function DUF589             | 33.33%            | 4                       | K.SEPDAYAWQLVK.D<br>R.VTFTEWQLIK.M<br>K.DITGIVDWGR.N<br>K.GDEALFYHSNIGK.E<br>K.QYLALIDVPAADGGDITDLPLAK.T<br>R.VFLDGEALVDPKAGLVPDAPR.D<br>R.VHAIEGLGFLAGDPPYVGR.G<br>K.SICGVVFGQSER.A<br>K.PDSADMTDQRAAAMSFYLR.D<br>K.LAASPLHALGLR.A<br>R.NLHTDLDDGVKIV.V<br>K.VFAVEPEASVIVGGQPAPHPIQIGAGFIPR.N<br>R.VLGFNYDTGER.Y<br>R.IGLAMIEAAER.D<br>K.EGGTIVEPTSIGNTGIGLMAAAVK.G<br>K.ANSLETIGNTPHIR.M<br>R.YLSPDFLPEI.<br>R.AATEEGMLVGISSGATLAAIAQK.L<br>R.TTGPDELADR.D<br>R.RAATEEGMLVGISSGATLAAIAQK.L<br>K.LVLPMESSSLER.R<br>R.DGSLKEGGTIVEPTSIGNTGIGLMAAAVK.G<br>R.AIELVETTPGAWMPQQFENEANIDVHIR.T<br>K.LFPDAEVDVW.S<br>R.NLHTDLDDGVKIVDASAAK.D<br>R.LMLAYGATDLTPR.E<br>R.SNPGSISKDR.I<br>.MKANSLETIGNTPHIR.M<br>R.IGLAMIEAAER.D<br>R.AIELVETTPGAWMPQQFENEANIDVHIR.T<br>R.IGLAMIEAAERDGLSK.E<br>R.DGSLKEGGTIVEPTSIGNTGIGLMAAAVK.G<br>R.AATEEGMLVGISSGATLAAIAQK.L<br>K.LFPDAEVDVW.K.S<br>R.AFAVAIAEALR.W<br>R.TLPGQIADAGLDGFFIAR.L<br>K.LINPVVYAIR.R<br>K.FDEGDALFVGGQPSDQVK.A<br>K.ADLINDGEVAIQEGNDKPYIYR.G<br>R.GFQVDEWKL.R.E<br>K.DLTPSSVDHADFHAR.P<br>R.RYPFLAK.L<br>R.EVFAEQVK.S                                                                                                                                                                                                                                                                                                                                                                                                                                                                                                                                                                                                                                                                                                                                                                                                                                                                                                                                                                                                                                                                                                                                                                                                                                                                                                                                                                                                                                                                                                                                                                                                                                                                                                                                                                                                                                                                                                                                                                                                                                                                                    |
| YP_616093 | Sala_1043 | pseudouridine synthase                         | 28.63%            | 3                       | K.QYLALIDVPAADGGDITDLPLAK.T<br>R.VFLDGEALVDPKAGLVPDAPR.D<br>R.VHAIEGLGFLAGDPPYVGR.G<br>K.SICGVVFGQSER.A<br>K.PDSADMTDQRAAAMSFYLR.D<br>K.LAASPLHALGLR.A<br>R.NLHTDLDDGVKIV.V<br>K.VFAVEPEASVIVGGQPAPHPIQIGAGFIPR.N<br>R.VLGFNYDTGER.Y<br>R.IGLAMIEAAER.D<br>K.EGGTIVEPTSIGNTGIGLMAAAVK.G<br>K.ANSLETIGNTPHIR.M<br>R.YLSPDFLPEI.<br>R.AATEEGMLVGISSGATLAAIAQK.L<br>R.TTGPDELADR.D<br>R.RAATEEGMLVGISSGATLAAIAQK.L<br>K.LVLPMESSSLER.R<br>R.DGSLKEGGTIVEPTSIGNTGIGLMAAAVK.G<br>R.AIELVETTPGAWMPQQFENEANIDVHIR.T<br>K.LFPDAEVDVW.S<br>R.NLHTDLDDGVKIVDASAAK.D<br>R.LMLAYGATDLTPR.E<br>R.SNPGSISKDR.I<br>.MKANSLETIGNTPHIR.M<br>R.IGLAMIEAAER.D<br>R.AIELVETTPGAWMPQQFENEANIDVHIR.T<br>R.IGLAMIEAAERDGLSK.E<br>R.DGSLKEGGTIVEPTSIGNTGIGLMAAAVK.G<br>R.AATEEGMLVGISSGATLAAIAQK.L<br>K.LFPDAEVDVW.K.S<br>R.AFAVAIAEALR.W<br>R.TLPGQIADAGLDGFFIAR.L<br>K.LINPVVYAIR.R<br>K.FDEGDALFVGGQPSDQVK.A<br>K.ADLINDGEVAIQEGNDKPYIYR.G<br>R.GFQVDEWKL.R.E<br>K.DLTPSSVDHADFHAR.P<br>R.RYPFLAK.L<br>R.EVFAEQVK.S                                                                                                                                                                                                                                                                                                                                                                                                                                                                                                                                                                                                                                                                                                                                                                                                                                                                                                                                                                                                                                                                                                                                                                                                                                                                                                                                                                                                                                                                                                                                                                                                                                                                                                                                                                                                                                                                                                                                                                                                                                                                                                                                                                 |
| YP_616094 | Sala_1044 | cell wall hydrolase, SleB                      | 12.37%            | 3                       | K.SICGVVFGQSER.A<br>K.PDSADMTDQRAAAMSFYLR.D<br>K.LAASPLHALGLR.A<br>R.NLHTDLDDGVKIV.V<br>K.VFAVEPEASVIVGGQPAPHPIQIGAGFIPR.N<br>R.VLGFNYDTGER.Y<br>R.IGLAMIEAAER.D<br>K.EGGTIVEPTSIGNTGIGLMAAAVK.G<br>K.ANSLETIGNTPHIR.M<br>R.YLSPDFLPEI.<br>R.AATEEGMLVGISSGATLAAIAQK.L<br>R.TTGPDELADR.D<br>R.RAATEEGMLVGISSGATLAAIAQK.L<br>K.LVLPMESSSLER.R<br>R.DGSLKEGGTIVEPTSIGNTGIGLMAAAVK.G<br>R.AIELVETTPGAWMPQQFENEANIDVHIR.T<br>K.LFPDAEVDVW.S<br>R.NLHTDLDDGVKIVDASAAK.D<br>R.LMLAYGATDLTPR.E<br>R.SNPGSISKDR.I<br>.MKANSLETIGNTPHIR.M<br>R.IGLAMIEAAER.D<br>R.AIELVETTPGAWMPQQFENEANIDVHIR.T<br>R.IGLAMIEAAERDGLSK.E<br>R.DGSLKEGGTIVEPTSIGNTGIGLMAAAVK.G<br>R.AATEEGMLVGISSGATLAAIAQK.L<br>K.LFPDAEVDVW.K.S<br>R.AFAVAIAEALR.W<br>R.TLPGQIADAGLDGFFIAR.L<br>K.LINPVVYAIR.R<br>K.FDEGDALFVGGQPSDQVK.A<br>K.ADLINDGEVAIQEGNDKPYIYR.G<br>R.GFQVDEWKL.R.E<br>K.DLTPSSVDHADFHAR.P<br>R.RYPFLAK.L<br>R.EVFAEQVK.S                                                                                                                                                                                                                                                                                                                                                                                                                                                                                                                                                                                                                                                                                                                                                                                                                                                                                                                                                                                                                                                                                                                                                                                                                                                                                                                                                                                                                                                                                                                                                                                                                                                                                                                                                                                                                                                                                                                                                                                                                                                                                                                                                                                                                                                        |
| YP_616095 | Sala_1045 | cysteine synthases                             | 81.05%            | 25                      | K.VFAVEPEASVIVGGQPAPHPIQIGAGFIPR.N<br>R.VLGFNYDTGER.Y<br>R.IGLAMIEAAER.D<br>K.EGGTIVEPTSIGNTGIGLMAAAVK.G<br>K.ANSLETIGNTPHIR.M<br>R.YLSPDFLPEI.<br>R.AATEEGMLVGISSGATLAAIAQK.L<br>R.TTGPDELADR.D<br>R.RAATEEGMLVGISSGATLAAIAQK.L<br>K.LVLPMESSSLER.R<br>R.DGSLKEGGTIVEPTSIGNTGIGLMAAAVK.G<br>R.AIELVETTPGAWMPQQFENEANIDVHIR.T<br>K.LFPDAEVDVW.S<br>R.NLHTDLDDGVKIVDASAAK.D<br>R.LMLAYGATDLTPR.E<br>R.SNPGSISKDR.I<br>.MKANSLETIGNTPHIR.M<br>R.IGLAMIEAAER.D<br>R.AIELVETTPGAWMPQQFENEANIDVHIR.T<br>R.IGLAMIEAAERDGLSK.E<br>R.DGSLKEGGTIVEPTSIGNTGIGLMAAAVK.G<br>R.AATEEGMLVGISSGATLAAIAQK.L<br>K.LFPDAEVDVW.K.S<br>R.AFAVAIAEALR.W<br>R.TLPGQIADAGLDGFFIAR.L<br>K.LINPVVYAIR.R<br>K.FDEGDALFVGGQPSDQVK.A<br>K.ADLINDGEVAIQEGNDKPYIYR.G<br>R.GFQVDEWKL.R.E<br>K.DLTPSSVDHADFHAR.P<br>R.RYPFLAK.L<br>R.EVFAEQVK.S                                                                                                                                                                                                                                                                                                                                                                                                                                                                                                                                                                                                                                                                                                                                                                                                                                                                                                                                                                                                                                                                                                                                                                                                                                                                                                                                                                                                                                                                                                                                                                                                                                                                                                                                                                                                                                                                                                                                                                                                                                                                                                                                                                                                                                                                                                                                                |

| Accession | Locus tag | Description                                                | Sequence coverage | No. peptides identified | List of peptides identified                                                                                                                                                                                                                                                                                                                                                                                                                                                                                                                                                                                                                                                                                                                                                                                                                                                                                                                                                                                                                                                                                                                                                                                                                                                                                                                                                                                                                                                                                                                                                                                                                                                                                                                                                                                                                                                                                                                                                                                                                                                                                                                                                                                                                                                                                                                                                                                                                                                                                                                                                                                                                                                                                                                                                                                                                                                                                                                                                                                                                                                                                                                                                                                                                                                                                                                                                                                              |
|-----------|-----------|------------------------------------------------------------|-------------------|-------------------------|--------------------------------------------------------------------------------------------------------------------------------------------------------------------------------------------------------------------------------------------------------------------------------------------------------------------------------------------------------------------------------------------------------------------------------------------------------------------------------------------------------------------------------------------------------------------------------------------------------------------------------------------------------------------------------------------------------------------------------------------------------------------------------------------------------------------------------------------------------------------------------------------------------------------------------------------------------------------------------------------------------------------------------------------------------------------------------------------------------------------------------------------------------------------------------------------------------------------------------------------------------------------------------------------------------------------------------------------------------------------------------------------------------------------------------------------------------------------------------------------------------------------------------------------------------------------------------------------------------------------------------------------------------------------------------------------------------------------------------------------------------------------------------------------------------------------------------------------------------------------------------------------------------------------------------------------------------------------------------------------------------------------------------------------------------------------------------------------------------------------------------------------------------------------------------------------------------------------------------------------------------------------------------------------------------------------------------------------------------------------------------------------------------------------------------------------------------------------------------------------------------------------------------------------------------------------------------------------------------------------------------------------------------------------------------------------------------------------------------------------------------------------------------------------------------------------------------------------------------------------------------------------------------------------------------------------------------------------------------------------------------------------------------------------------------------------------------------------------------------------------------------------------------------------------------------------------------------------------------------------------------------------------------------------------------------------------------------------------------------------------------------------------------------------------|
|           |           |                                                            |                   |                         | K.NFEAQR.T<br>R.FFPVFSAGDNPVPLALMLNEGINTFVDDQGGK.L<br>R.TGMFMELK.A<br>R.RLDSAFVLVQIAVPLTSDVFSACR.F<br>R.GFQMVDEK.L<br>K.MQLVTEPAV.<br>K.LQPTDELSCFDPTSGAIGK.F<br>K.KADLLMDGEVAIQEENDKPYIYR.G<br>K.KADLLMDGEVAIQEENDKPYIYR.G<br>K.AVLEKKNFEAQR.T<br>K.ADLLMDGEVAIQEENDKPYIYR.G<br>R.YPFLAK.L<br>R.HIDVAAGIAEAGVLQSFHDAVLTHGLR.F<br>R.ALVAGIEAVLPDGSIFDGLAPLKK.D<br>R.ELAAQVAENFEK.Y<br>K.FADL.SDELLR.A<br>R.AFTLTPSDDEAIDNIQK.L<br>R.NENIEQFVVK.T<br>K.LTGVNIPVHGATADAAAPKDEPR.E<br>R.AGEIHMDDQSSR.I<br>K.TASFVLPIMIDLAHGR.A<br>K.LADK.FSNPK.T<br>K.AAGTLNLSVSDVAAR.G<br>R.AIDESGSEPTAIQAGAPSVLMMR.D<br>K.GVSHVNFADAPWHPDDYVHR.I<br>R.SLLEPTRELAQVAENFEK.Y<br>K.GVDVLIATPGR.L<br>R.IAELDRFK.A<br>K.GVDVLIATPGR.LMDLFR.G<br>R.ETVHEGIEAPEAFLGLFSGENIGK.M<br>R.DLPTPLDKDQLR.V<br>K.AAPVLPQLAALER.L<br>R.LGKPGIDVYFDNVGGEHLDAAFATANDFAR.F<br>K.AWHLTSRPGQLPTIDNFKR.D<br>K.SYASRQLDQPHGTGAIGK.V<br>R.VAAAKPGDVFVVSAGAVGSVAVQIAK.A<br>K.LPTALLDAGLPQTFLHNMGLTGTAWIGLLR.V<br>K.AREMTVIGSAGGAEK.C<br>R.TFDLLIDAPYATGAGSVALDK.L<br>K.NLAALGAPR.A<br>R.LGVIAFSDSWISLETGER.E<br>R.ETLFSMLTSR.L<br>R.NQVIEMLTEGK.N<br>R.VLEHLGLQVSR.L<br>R.LDYNTEGLLLTNDGAFKR.Q<br>R.AFGDLSAQLEELVIMGIEIDGIR.Y<br>R.LLIEDRRTAFDNEHLK.H<br>K.HAGYDVVATVDSGEAVR.F<br>R.AQTGDRDAYQNAFGR.I<br>R.GVPYIATAAGGAR.M<br>R.LIGYLAPEK.A<br>R.MQEGTSLMQMPR.A<br>R.FAQLFGGLHEHIAAPAPEDPLKFR.D<br>R.AGLPVVLLDPTTGGVTSYAMLGDVQIAEPK.A<br>R.AEYLLDHGMDMVHRK.D<br>R.DTADNLWHK.C<br>K.ALIGFAGQR.V<br>R.GTTTADIFAIAAFAFR.Q<br>R.FPQQAQAR.V<br>K.AATDLPAVGFVGR.T<br>R.LPTVLDGAGGLYVSVAGITGQQQAQASIDEAVAR.L<br>R.VADGVVGSADFIIIAHGDAAAPHVEAFTR.T<br>R.TLDAIHSK.E<br>R.LKAATDLPAVGFVGR.T<br>R.VGVDGVLCVDPAEEDPELGPALR.A<br>R.HPOTRVLMLGYNPMTIR.G<br>R.AMGIDL.R.L<br>K.LLGAEVVAVTSGAR.T<br>R.VRVEPVTDAEALASFQK.L<br>R.PSPLWLAQR.L<br>R.DFQSVIGDEAR.E<br>R.LPDMLIAPVGGGSAIGLPHFPLDDEIVGVVEAAGEGLDGK.H<br>R.LEGIIIPALESAHAIAAER.I<br>K.LTRLEGIIPALESAHAIAAER.I<br>R.YVAETLMLPLDLEH.H<br>R.EDLNHTGAHK.I<br>R.AAQADPAKAEFDYLLK.H<br>K.TYLLQDQAGQTEAHISAGLDYPSIGPEHSLWHDIGR.V<br>K.INNCIGILLAK.R<br>K.HAASLAGKPGILHGNK.T<br>K.AEFDYLLK.H<br>R.LGATHIGLVHYEPSQR.H<br>R.ILFDAPAAALPGGTGR.F<br>K.AIGLKAETLIR.H<br>K.VALLLVNASQTLTGEALSMVRPDIQFHGSETPEWLTVVK.R<br>K.DMDKIAAFLK.A<br>K.LGLPFLDLK.L<br>K.AIQALRLEPAITVHAAGGR.A<br>R.VIAVTVLTSLDAPLEDIGLTPHQVVR.L<br>K.AWPGFFVVGVR.P<br>R.LVTPAQMSDQASILVGRPTQSSDPDLAAR.E<br>R.EAGLDGIVCSGQEVK.S<br>R.PITQSSDPDLAAR.E<br>R.RLDAIER.Q<br>R.WSLKRRLLDAIERQAADLR.A<br>R.NPVLTEINTGLAR.M<br>K.LGLSIEPSTQVPR.D<br>R.VLLALTQAGASR.E<br>R.SHGIIAEPVTFGLK.M<br>K.VVESDQGLSLELLK.S<br>R.TEVEAEVYSPGQK.G<br>K.HDVIAFLTWVAENVEEAR.F<br>K.ALWVWATRPAIDVAIDAEAVTK.H<br>R.LSADQTELFDLDYHMK.H<br>R.FIGPDATTLDFALAR.L<br>R.YARPEMTAIWSAENR.F<br>K.MAEYAEFSR.C<br>K.HVDITFDR.V<br>R.MGLVHSQR.V<br>R.SAVTPAMENVALWHER.D<br>R.VLLALTQAGASREDSYALVQR.N<br>R.PAIDVAIDAIEAVTK.H<br>R.LTGVIDKLLVYVDR.M<br>R.DRHAMFFAVLGVIASSIER.L<br>K.HVDTIFDRVFGAA.<br>R.VEAHVAEK.L<br>R.EDSYALVQR.N<br>K.SDADVTR.L<br>K.RNPVLTEINTGLAR.M<br>K.ALWVWATR.P<br>R.LTGVIDK.L<br>R.DISHSSVER.F<br>R.SAVTPAMENVALWHERDISHSSVER.F<br>R.MGGLVHSQR.V<br>R.LSADQTELFDLDYHMK.H<br>R.AEIAICISGAVGTANIDPR.V<br>K.VVESDQGLSLELLKSDADVTR.L<br>R.HAMFFAVLGVIASSIER.L<br>R.FSIIWEIEAHATDALAELGTVPPSAK.A<br>K.MAEYAEFSR.C<br>R.EFGSLAQLVSDPESLR.R<br>R.VDGLGDTGIAALK.I<br>R.AAQIGEQPDGVLGFTVTPAIR.A<br>R.ALVDQINIKR.R<br>R.ALVDQINIKR.K<br>R.NPAADGQQR.L<br>K.LIGAGLAAIGAGMAAIGVGNVFGSLESALR.N |
| YP_616099 | Sala_1049 | FAD linked oxidase-like protein                            | 11.39%            | 2                       |                                                                                                                                                                                                                                                                                                                                                                                                                                                                                                                                                                                                                                                                                                                                                                                                                                                                                                                                                                                                                                                                                                                                                                                                                                                                                                                                                                                                                                                                                                                                                                                                                                                                                                                                                                                                                                                                                                                                                                                                                                                                                                                                                                                                                                                                                                                                                                                                                                                                                                                                                                                                                                                                                                                                                                                                                                                                                                                                                                                                                                                                                                                                                                                                                                                                                                                                                                                                                          |
| YP_616101 | Sala_1051 | DEAD/DEAH box helicase-like protein                        | 45.63%            | 15                      |                                                                                                                                                                                                                                                                                                                                                                                                                                                                                                                                                                                                                                                                                                                                                                                                                                                                                                                                                                                                                                                                                                                                                                                                                                                                                                                                                                                                                                                                                                                                                                                                                                                                                                                                                                                                                                                                                                                                                                                                                                                                                                                                                                                                                                                                                                                                                                                                                                                                                                                                                                                                                                                                                                                                                                                                                                                                                                                                                                                                                                                                                                                                                                                                                                                                                                                                                                                                                          |
| YP_616105 | Sala_1055 | Alcohol dehydrogenase, zinc-binding                        | 58.16%            | 9                       |                                                                                                                                                                                                                                                                                                                                                                                                                                                                                                                                                                                                                                                                                                                                                                                                                                                                                                                                                                                                                                                                                                                                                                                                                                                                                                                                                                                                                                                                                                                                                                                                                                                                                                                                                                                                                                                                                                                                                                                                                                                                                                                                                                                                                                                                                                                                                                                                                                                                                                                                                                                                                                                                                                                                                                                                                                                                                                                                                                                                                                                                                                                                                                                                                                                                                                                                                                                                                          |
| YP_616107 | Sala_1057 | conserved hypothetical protein 95                          | 32.78%            | 4                       |                                                                                                                                                                                                                                                                                                                                                                                                                                                                                                                                                                                                                                                                                                                                                                                                                                                                                                                                                                                                                                                                                                                                                                                                                                                                                                                                                                                                                                                                                                                                                                                                                                                                                                                                                                                                                                                                                                                                                                                                                                                                                                                                                                                                                                                                                                                                                                                                                                                                                                                                                                                                                                                                                                                                                                                                                                                                                                                                                                                                                                                                                                                                                                                                                                                                                                                                                                                                                          |
| YP_616108 | Sala_1058 | Pseudouridine synthase, Rsu                                | 22.81%            | 4                       |                                                                                                                                                                                                                                                                                                                                                                                                                                                                                                                                                                                                                                                                                                                                                                                                                                                                                                                                                                                                                                                                                                                                                                                                                                                                                                                                                                                                                                                                                                                                                                                                                                                                                                                                                                                                                                                                                                                                                                                                                                                                                                                                                                                                                                                                                                                                                                                                                                                                                                                                                                                                                                                                                                                                                                                                                                                                                                                                                                                                                                                                                                                                                                                                                                                                                                                                                                                                                          |
| YP_616109 | Sala_1059 | response regulator receiver protein                        | 25.52%            | 2                       |                                                                                                                                                                                                                                                                                                                                                                                                                                                                                                                                                                                                                                                                                                                                                                                                                                                                                                                                                                                                                                                                                                                                                                                                                                                                                                                                                                                                                                                                                                                                                                                                                                                                                                                                                                                                                                                                                                                                                                                                                                                                                                                                                                                                                                                                                                                                                                                                                                                                                                                                                                                                                                                                                                                                                                                                                                                                                                                                                                                                                                                                                                                                                                                                                                                                                                                                                                                                                          |
| YP_616112 | Sala_1062 | acetyl-CoA carboxylase, carboxyl transferase, beta subunit | 51.24%            | 9                       |                                                                                                                                                                                                                                                                                                                                                                                                                                                                                                                                                                                                                                                                                                                                                                                                                                                                                                                                                                                                                                                                                                                                                                                                                                                                                                                                                                                                                                                                                                                                                                                                                                                                                                                                                                                                                                                                                                                                                                                                                                                                                                                                                                                                                                                                                                                                                                                                                                                                                                                                                                                                                                                                                                                                                                                                                                                                                                                                                                                                                                                                                                                                                                                                                                                                                                                                                                                                                          |
| YP_616113 | Sala_1063 | tryptophan synthase, alpha subunit                         | 64.02%            | 10                      |                                                                                                                                                                                                                                                                                                                                                                                                                                                                                                                                                                                                                                                                                                                                                                                                                                                                                                                                                                                                                                                                                                                                                                                                                                                                                                                                                                                                                                                                                                                                                                                                                                                                                                                                                                                                                                                                                                                                                                                                                                                                                                                                                                                                                                                                                                                                                                                                                                                                                                                                                                                                                                                                                                                                                                                                                                                                                                                                                                                                                                                                                                                                                                                                                                                                                                                                                                                                                          |
| YP_616114 | Sala_1064 | tryptophan synthase, beta subunit                          | 54.88%            | 14                      |                                                                                                                                                                                                                                                                                                                                                                                                                                                                                                                                                                                                                                                                                                                                                                                                                                                                                                                                                                                                                                                                                                                                                                                                                                                                                                                                                                                                                                                                                                                                                                                                                                                                                                                                                                                                                                                                                                                                                                                                                                                                                                                                                                                                                                                                                                                                                                                                                                                                                                                                                                                                                                                                                                                                                                                                                                                                                                                                                                                                                                                                                                                                                                                                                                                                                                                                                                                                                          |
| YP_616115 | Sala_1065 | Phosphoribosylanthranilate isomerase                       | 44.60%            | 5                       |                                                                                                                                                                                                                                                                                                                                                                                                                                                                                                                                                                                                                                                                                                                                                                                                                                                                                                                                                                                                                                                                                                                                                                                                                                                                                                                                                                                                                                                                                                                                                                                                                                                                                                                                                                                                                                                                                                                                                                                                                                                                                                                                                                                                                                                                                                                                                                                                                                                                                                                                                                                                                                                                                                                                                                                                                                                                                                                                                                                                                                                                                                                                                                                                                                                                                                                                                                                                                          |
| YP_616116 | Sala_1066 | orotidine 5'-phosphate decarboxylase                       | 54.02%            | 7                       |                                                                                                                                                                                                                                                                                                                                                                                                                                                                                                                                                                                                                                                                                                                                                                                                                                                                                                                                                                                                                                                                                                                                                                                                                                                                                                                                                                                                                                                                                                                                                                                                                                                                                                                                                                                                                                                                                                                                                                                                                                                                                                                                                                                                                                                                                                                                                                                                                                                                                                                                                                                                                                                                                                                                                                                                                                                                                                                                                                                                                                                                                                                                                                                                                                                                                                                                                                                                                          |
| YP_616117 | Sala_1067 | hypothetical protein                                       | 13.14%            | 2                       |                                                                                                                                                                                                                                                                                                                                                                                                                                                                                                                                                                                                                                                                                                                                                                                                                                                                                                                                                                                                                                                                                                                                                                                                                                                                                                                                                                                                                                                                                                                                                                                                                                                                                                                                                                                                                                                                                                                                                                                                                                                                                                                                                                                                                                                                                                                                                                                                                                                                                                                                                                                                                                                                                                                                                                                                                                                                                                                                                                                                                                                                                                                                                                                                                                                                                                                                                                                                                          |
| YP_616118 | Sala_1068 | adenylosuccinate lyase                                     | 77.63%            | 35                      |                                                                                                                                                                                                                                                                                                                                                                                                                                                                                                                                                                                                                                                                                                                                                                                                                                                                                                                                                                                                                                                                                                                                                                                                                                                                                                                                                                                                                                                                                                                                                                                                                                                                                                                                                                                                                                                                                                                                                                                                                                                                                                                                                                                                                                                                                                                                                                                                                                                                                                                                                                                                                                                                                                                                                                                                                                                                                                                                                                                                                                                                                                                                                                                                                                                                                                                                                                                                                          |
| YP_616120 | Sala_1070 | DNA repair protein RadC                                    | 11.03%            | 2                       |                                                                                                                                                                                                                                                                                                                                                                                                                                                                                                                                                                                                                                                                                                                                                                                                                                                                                                                                                                                                                                                                                                                                                                                                                                                                                                                                                                                                                                                                                                                                                                                                                                                                                                                                                                                                                                                                                                                                                                                                                                                                                                                                                                                                                                                                                                                                                                                                                                                                                                                                                                                                                                                                                                                                                                                                                                                                                                                                                                                                                                                                                                                                                                                                                                                                                                                                                                                                                          |
| YP_616124 | Sala_1074 | Uncharacterized conserved protein UCPO25560                | 25.37%            | 3                       |                                                                                                                                                                                                                                                                                                                                                                                                                                                                                                                                                                                                                                                                                                                                                                                                                                                                                                                                                                                                                                                                                                                                                                                                                                                                                                                                                                                                                                                                                                                                                                                                                                                                                                                                                                                                                                                                                                                                                                                                                                                                                                                                                                                                                                                                                                                                                                                                                                                                                                                                                                                                                                                                                                                                                                                                                                                                                                                                                                                                                                                                                                                                                                                                                                                                                                                                                                                                                          |
| YP_616127 | Sala_1077 | H+-transporting two-sector ATPase, C subunit               | 56.00%            | 2                       |                                                                                                                                                                                                                                                                                                                                                                                                                                                                                                                                                                                                                                                                                                                                                                                                                                                                                                                                                                                                                                                                                                                                                                                                                                                                                                                                                                                                                                                                                                                                                                                                                                                                                                                                                                                                                                                                                                                                                                                                                                                                                                                                                                                                                                                                                                                                                                                                                                                                                                                                                                                                                                                                                                                                                                                                                                                                                                                                                                                                                                                                                                                                                                                                                                                                                                                                                                                                                          |

| Accession | Locus tag | Description                                                    | Sequence coverage | No. peptides identified | List of peptides identified                                                                                                                                                                                                                                                                                                                                                                                                                                                                                                                                                                                                                                                                                                                                                                                                                                                                                                                                                                                                                                                                                                                                                                                                                                                                                                                                                                                                                                                                                                                                                                                                                                                                                                                                                                                                                                                                                                                                                                                                                                                                                                                                                                                                                                                                                                                                                                                                                                                                                                                                                                                                                                                                                                                                                                                                                                                                                                                                                                                                                                                                                                                                                                                                                                   |
|-----------|-----------|----------------------------------------------------------------|-------------------|-------------------------|---------------------------------------------------------------------------------------------------------------------------------------------------------------------------------------------------------------------------------------------------------------------------------------------------------------------------------------------------------------------------------------------------------------------------------------------------------------------------------------------------------------------------------------------------------------------------------------------------------------------------------------------------------------------------------------------------------------------------------------------------------------------------------------------------------------------------------------------------------------------------------------------------------------------------------------------------------------------------------------------------------------------------------------------------------------------------------------------------------------------------------------------------------------------------------------------------------------------------------------------------------------------------------------------------------------------------------------------------------------------------------------------------------------------------------------------------------------------------------------------------------------------------------------------------------------------------------------------------------------------------------------------------------------------------------------------------------------------------------------------------------------------------------------------------------------------------------------------------------------------------------------------------------------------------------------------------------------------------------------------------------------------------------------------------------------------------------------------------------------------------------------------------------------------------------------------------------------------------------------------------------------------------------------------------------------------------------------------------------------------------------------------------------------------------------------------------------------------------------------------------------------------------------------------------------------------------------------------------------------------------------------------------------------------------------------------------------------------------------------------------------------------------------------------------------------------------------------------------------------------------------------------------------------------------------------------------------------------------------------------------------------------------------------------------------------------------------------------------------------------------------------------------------------------------------------------------------------------------------------------------------------|
| YP_616128 | Sala_1078 | H+-transporting two-sector ATPase, B/B' subunit                | 34.34%            | 5                       | K.LLSAAEADIAAR.S<br>R.SSAMAIEESVAAEAAAGELVAK.L<br>K.AAHAAADKLEESYR.Q<br>K.VADDLAAAK.A<br>R.KVADDLAAAK.A<br>R.IAAEANALAEVR.A<br>K.ALVDQAIASIAK.G<br>K.LIADRHDVAADK.A<br>R.ARADAEQAQVAK.A<br>R.ADAEAQAQVAK.A<br>K.ALVDQAIASIAK.G<br>R.LDAESLKAIEYEA.L<br>K.AKADATALIAR.R<br>K.ADATALIAR.R<br>K.QLGEAEQLRLDAESLK.A<br>K.GVPGAIAAMLDR.R<br>K.GVPGAIAAMLDR.I<br>R.HDVAADK.A<br>R.YELLLELAEFGLEDKPR.A<br>R.TEEQLGGATVELLES.R.A<br>K.LFSGLEDSSALRPEVASAIDLIVR.E<br>R.HLRPEQALGLR.A<br>K.VIAALALPVDLDR.A<br>R.GLYEPHGSAPDIAGK.G<br>K.AADAILFGAVGDPFR.F<br>K.ANVLETSQLWR.D<br>R.AELGLFANLRPAK.L<br>R.HSGGDEANAR.I<br>R.GADLGGTMTALGDVVAALNG.<br>R.ELNGDVYFGEK.G<br>K.AKAADAILFGAVGDPFR.F<br>R.ALVGGAAACATGHPPLAETLAK.A<br>K.GIANPLAMILSLAMLLR.H<br>R.QGYDIMSYSSEVSR.R<br>R.LCSVDKANVLETSQLWR.D<br>K.FINVELPFQR.N<br>R.INIGLEDPRDIADLDQALTR.V<br>R.FGIDTTVVDGR.D<br>R.SEHGETSEALFLTSYTYDSAEVAAR.F<br>R.ILHPGLASHPHQDLAK.S<br>R.VFFFTFANPTMVDIVDR.H<br>R.NTGNLSPFNWVVMK.G<br>R.FGIDTTVVDGRDNEAWER.A<br>R.DIADLDQALTR.V<br>K.AHGITSVDNFAFATSALQRPMDFGADVAYSATK.L<br>R.RQSENALAVGK.F<br>R.EQAMAFNALELVDISNIGDSR.S<br>R.FAGEAQGMYSR.L<br>R.LQNPTVAMLEER.I<br>R.VLAGAVGTEK.F<br>R.INIGLEDPR.D<br>R.FAGEAQGMYSR.L<br>R.EQAMAFNALELVDISNIGDSR.S<br>K.TWHPTQAVR.G<br>K.AHGITSVDNFAFATSALQR.P<br>R.WLIDHLCPR.F<br>R.TQATGMAAMTALLCQLSAGDHIVAAK.A<br>R.NTGNLSPFNWVVMK.G<br>R.ADMGWEGMLR.I<br>R.ADMGWEGMLR.I<br>R.VENHGDVAQQLSR.H<br>R.VAVSYLPEQSHPALGR.W<br>R.MDSFFFSATTGPVTVR.V<br>R.QGFLQFEESVR.A<br>R.AADDELAVTPAAVQQIR.A<br>R.YSQQADVRF.F<br>R.GYWLVAPTQWR.Q<br>R.ALEDMGLVLLFR.R<br>R.LGDAGLAIDAAAANGLGHANVPAMLAEGDIAAGR.V<br>R.AMQAQGSSQSLTIAAPR.D<br>K.GLELTGEAQGLDALR.Q<br>R.IDSLEWASPSQVAR.L<br>R.NIPFLTVEAFK.G<br>R.WSDVPLTHASFSSAGTAGWPR.D<br>R.RADQLVDLIAGR.I<br>R.AVTANLIAQYGAPVAVDVGATSSNLSGTVR.L<br>K.LYLDELAAQVAAGK.R<br>R.FEKGVATVLLDVAAGADEK.V<br>K.GVATVLLDVAAGADEKVGRL.I<br>K.GGSETGVLSMILLGQR.K<br>R.LLDVNADKMLVANVDGVSFAGGPR.F<br>R.AAFVGSADADQRR.L<br>K.MVLNVDGVSFAGGPR.F<br>K.GVATVLLDVAAGADEK.V<br>R.LTAGLSAYR.D<br>R.ALLGLVDR.M<br>K.ILNVASASADKIR.A<br>R.GTSVSFIPDPEIFGEHGR.F<br>K.SALEVIMTMLHSGGK.F<br>R.RGTSVSFIPDPEIFGEHGR.F<br>K.ILNVASASADK.I<br>R.VTLPQYEER.H<br>R.NGHVYLAQPLYL.L<br>R.GAPLPLEELGATPNR.R<br>R.DHDFHFLSDNMDR.G<br>R.DDAHRAELATLTK.G<br>R.ALHHLAAEVIDNSMDEAVAGHATR.I<br>R.AFGELIGQK.K<br>R.FTTTNTANSFADNGK.T<br>R.AGYTPGGGALFVITGGGAYAR.L<br>K.DKDYV/VNVPGSAPATNPFLNNGGTDIR.R<br>R.MGNFVLGAVVEGGHVAR.D<br>R.NDKDQPEFFR.L<br>R.DSVSGFSTTPASYTMSR.E<br>R.MGNFVLGAVVEGGHVAR.D<br>R.EADYQANAR.L<br>R.DFDGPIYSIGGATLQGNDR.G<br>R.IVSIQGGFIR.Q<br>K.GLTASQADELGVSR.N<br>K.PAAEAPHIENAAAAPTKEAPR.I<br>K.TAAPATAKPAPAATAAR.P<br>R.QQPGDQQAIPPPAPPR.R<br>R.PASTVPRPEPK.P<br>R.LVPAKPSPEADK.T<br>R.AYQAQLR.G<br>R.RPPPPPPFGGPR.V<br>K.TSLLDNR.I<br>K.PAPAATAARPTAPATPR.P<br>R.VIPFISIDDRVIVDAAHPAVEVAPDSFTTK.M<br>R.VIAPESDYVDDDAAR.Q<br>R.DGAKPQFANDR.V<br>K.LADLLIIDADPTENIR.N<br>R.NVTPGPIFEYAQDSNR.D<br>R.IAEGLAYEQPR.F<br>R.GGWSNIDALR.A<br>R.GATLFSADLANIFANAPVDDKAPK.F<br>R.TIADFLLGDITVPIEGGTPTR.I<br>R.LLNQPNWSPDQQLVAK.K<br>R.WAEVSPDGR.S<br>R.AHTNVWEHPILTK.H<br>R.WTDAGLGEHVTGASGSSR.K<br>R.SLGTGEVWYHVS GGAGVPLVK.K<br>R.KVTATPGHYAEPF.F<br>R.IFSTGEIYGAK.A<br>R.IAATGTAER.I<br>R.AGLILAPR.I<br>R.YSLEDGSISTVASGNGGAVRPTSPDQGR.R |
| YP_616129 | Sala_1079 | H+-transporting two-sector ATPase, B/B' subunit                | 59.09%            | 13                      |                                                                                                                                                                                                                                                                                                                                                                                                                                                                                                                                                                                                                                                                                                                                                                                                                                                                                                                                                                                                                                                                                                                                                                                                                                                                                                                                                                                                                                                                                                                                                                                                                                                                                                                                                                                                                                                                                                                                                                                                                                                                                                                                                                                                                                                                                                                                                                                                                                                                                                                                                                                                                                                                                                                                                                                                                                                                                                                                                                                                                                                                                                                                                                                                                                                               |
| YP_616134 | Sala_1084 | Recombinational DNA repair protein (RecF pathway)-like protein | 17.71%            | 2                       |                                                                                                                                                                                                                                                                                                                                                                                                                                                                                                                                                                                                                                                                                                                                                                                                                                                                                                                                                                                                                                                                                                                                                                                                                                                                                                                                                                                                                                                                                                                                                                                                                                                                                                                                                                                                                                                                                                                                                                                                                                                                                                                                                                                                                                                                                                                                                                                                                                                                                                                                                                                                                                                                                                                                                                                                                                                                                                                                                                                                                                                                                                                                                                                                                                                               |
| YP_616135 | Sala_1085 | 3-isopropylmalate dehydrogenase                                | 60.34%            | 15                      |                                                                                                                                                                                                                                                                                                                                                                                                                                                                                                                                                                                                                                                                                                                                                                                                                                                                                                                                                                                                                                                                                                                                                                                                                                                                                                                                                                                                                                                                                                                                                                                                                                                                                                                                                                                                                                                                                                                                                                                                                                                                                                                                                                                                                                                                                                                                                                                                                                                                                                                                                                                                                                                                                                                                                                                                                                                                                                                                                                                                                                                                                                                                                                                                                                                               |
| YP_616136 | Sala_1086 | Cystathionine gamma-synthase                                   | 71.57%            | 25                      |                                                                                                                                                                                                                                                                                                                                                                                                                                                                                                                                                                                                                                                                                                                                                                                                                                                                                                                                                                                                                                                                                                                                                                                                                                                                                                                                                                                                                                                                                                                                                                                                                                                                                                                                                                                                                                                                                                                                                                                                                                                                                                                                                                                                                                                                                                                                                                                                                                                                                                                                                                                                                                                                                                                                                                                                                                                                                                                                                                                                                                                                                                                                                                                                                                                               |
| YP_616137 | Sala_1087 | ApaG                                                           | 36.09%            | 3                       |                                                                                                                                                                                                                                                                                                                                                                                                                                                                                                                                                                                                                                                                                                                                                                                                                                                                                                                                                                                                                                                                                                                                                                                                                                                                                                                                                                                                                                                                                                                                                                                                                                                                                                                                                                                                                                                                                                                                                                                                                                                                                                                                                                                                                                                                                                                                                                                                                                                                                                                                                                                                                                                                                                                                                                                                                                                                                                                                                                                                                                                                                                                                                                                                                                                               |
| YP_616138 | Sala_1088 | transcriptional regulator, LysR family                         | 48.29%            | 8                       |                                                                                                                                                                                                                                                                                                                                                                                                                                                                                                                                                                                                                                                                                                                                                                                                                                                                                                                                                                                                                                                                                                                                                                                                                                                                                                                                                                                                                                                                                                                                                                                                                                                                                                                                                                                                                                                                                                                                                                                                                                                                                                                                                                                                                                                                                                                                                                                                                                                                                                                                                                                                                                                                                                                                                                                                                                                                                                                                                                                                                                                                                                                                                                                                                                                               |
| YP_616140 | Sala_1090 | putative beta-lactamase                                        | 45.60%            | 13                      |                                                                                                                                                                                                                                                                                                                                                                                                                                                                                                                                                                                                                                                                                                                                                                                                                                                                                                                                                                                                                                                                                                                                                                                                                                                                                                                                                                                                                                                                                                                                                                                                                                                                                                                                                                                                                                                                                                                                                                                                                                                                                                                                                                                                                                                                                                                                                                                                                                                                                                                                                                                                                                                                                                                                                                                                                                                                                                                                                                                                                                                                                                                                                                                                                                                               |
| YP_616141 | Sala_1091 | DNA topoisomerase IV, B subunit                                | 25.19%            | 14                      |                                                                                                                                                                                                                                                                                                                                                                                                                                                                                                                                                                                                                                                                                                                                                                                                                                                                                                                                                                                                                                                                                                                                                                                                                                                                                                                                                                                                                                                                                                                                                                                                                                                                                                                                                                                                                                                                                                                                                                                                                                                                                                                                                                                                                                                                                                                                                                                                                                                                                                                                                                                                                                                                                                                                                                                                                                                                                                                                                                                                                                                                                                                                                                                                                                                               |
| YP_616142 | Sala_1092 | membrane protein                                               | 50.54%            | 9                       |                                                                                                                                                                                                                                                                                                                                                                                                                                                                                                                                                                                                                                                                                                                                                                                                                                                                                                                                                                                                                                                                                                                                                                                                                                                                                                                                                                                                                                                                                                                                                                                                                                                                                                                                                                                                                                                                                                                                                                                                                                                                                                                                                                                                                                                                                                                                                                                                                                                                                                                                                                                                                                                                                                                                                                                                                                                                                                                                                                                                                                                                                                                                                                                                                                                               |
| YP_616144 | Sala_1094 | GcrA cell cycle regulator                                      | 66.09%            | 11                      |                                                                                                                                                                                                                                                                                                                                                                                                                                                                                                                                                                                                                                                                                                                                                                                                                                                                                                                                                                                                                                                                                                                                                                                                                                                                                                                                                                                                                                                                                                                                                                                                                                                                                                                                                                                                                                                                                                                                                                                                                                                                                                                                                                                                                                                                                                                                                                                                                                                                                                                                                                                                                                                                                                                                                                                                                                                                                                                                                                                                                                                                                                                                                                                                                                                               |
| YP_616148 | Sala_1098 | amidohydrolase                                                 | 44.99%            | 34                      |                                                                                                                                                                                                                                                                                                                                                                                                                                                                                                                                                                                                                                                                                                                                                                                                                                                                                                                                                                                                                                                                                                                                                                                                                                                                                                                                                                                                                                                                                                                                                                                                                                                                                                                                                                                                                                                                                                                                                                                                                                                                                                                                                                                                                                                                                                                                                                                                                                                                                                                                                                                                                                                                                                                                                                                                                                                                                                                                                                                                                                                                                                                                                                                                                                                               |

| Accession | Locus tag | Description                                               | Sequence coverage | No. peptides identified | List of peptides identified                                                                                                                                                                                                                                                                                                                                                                                                                                                                                                                                                                                                                                                                                                                                                                                                                                                                                                                                                                                                                                                                                                                                                                                                                                                                                                                                                                                                                                                                                                                                                                                                                                                                                                                                                                                                                                                                                                                                                                                                                                                                                                                                                                                                                                                                                                                                                                                                                                                                                                                                                                                                                                                                                                                                                                                                                                                                                                                                                                                                                                                                                                                                                                                                                                                                                                      |
|-----------|-----------|-----------------------------------------------------------|-------------------|-------------------------|----------------------------------------------------------------------------------------------------------------------------------------------------------------------------------------------------------------------------------------------------------------------------------------------------------------------------------------------------------------------------------------------------------------------------------------------------------------------------------------------------------------------------------------------------------------------------------------------------------------------------------------------------------------------------------------------------------------------------------------------------------------------------------------------------------------------------------------------------------------------------------------------------------------------------------------------------------------------------------------------------------------------------------------------------------------------------------------------------------------------------------------------------------------------------------------------------------------------------------------------------------------------------------------------------------------------------------------------------------------------------------------------------------------------------------------------------------------------------------------------------------------------------------------------------------------------------------------------------------------------------------------------------------------------------------------------------------------------------------------------------------------------------------------------------------------------------------------------------------------------------------------------------------------------------------------------------------------------------------------------------------------------------------------------------------------------------------------------------------------------------------------------------------------------------------------------------------------------------------------------------------------------------------------------------------------------------------------------------------------------------------------------------------------------------------------------------------------------------------------------------------------------------------------------------------------------------------------------------------------------------------------------------------------------------------------------------------------------------------------------------------------------------------------------------------------------------------------------------------------------------------------------------------------------------------------------------------------------------------------------------------------------------------------------------------------------------------------------------------------------------------------------------------------------------------------------------------------------------------------------------------------------------------------------------------------------------------|
|           |           |                                                           |                   |                         | R.WGEDPGVYR.I<br>R.VHAGSELVSDYEVSPDGR.T<br>R.IAAGPAGAITIPAGAVTIDATGK.T<br>R.GATLFSADLANLAFANAPVDDK.A<br>R.RVIAPESDYVDDAAR.Q<br>R.LYDPTMNEAETGSR.K<br>R.AATIMPATSLGYAK.D<br>K.SQLVSTDLGDGDKR.V<br>R.VFVMASTDGK.S<br>R.VFVMASTDGK.S<br>R.KVPIAVDEGSMWNVDPDGR.T<br>R.GGGDNVWIMNR.D<br>R.DAYWVETEK.P<br>K.DLASGAETK.L<br>K.AAGVYAEINGYDDALAHV.R<br>R.WPAPVVLHAGEVLAQPVAAIR.L<br>R.VGFDVAGQMSGTVHLGTADQPYR.A<br>R.WAALVGQPELVGDRP.Y<br>R.RLVETADIVANLPHDALVK.L<br>R.LVEPVAYPGAPGDVPVIR.A<br>R.APQLGEHSDAIIAEIGYDVDAIAALR.A<br>K.LGLDYDLSLAINR.I<br>R.FANINRPVAGPTHDR.D<br>K.FGALPTDTAGR.A<br>R.HPLQYLSLTPNGVK.V<br>K.GLVYDAGEFLQVQYK.N<br>R.TQDKLEAADNV<br>R.WTDQLAARPAVK.R<br>R.VFESGAILHLAEK.F<br>R.SGAEPVRFESGAILHLAEK.F<br>R.VTGDPAQLR.E<br>R.HDASDFDLR.T<br>R.WTDQLAAR.P<br>K.IWTWOKESGGR.F<br>R.LAESTFJAGADYTIADMAINWPYVALVK.G<br>R.FANINRPVAGPTHDRDLVGR.H<br>R.ERHDASDFDLR.T<br>K.GLVYDAGEFLQVQYK.NVLR.W<br>K.TITYGGSNEIQR.N<br>R.LTETLEAVHYGAPYFR.G<br>R.KTITYGGSNEIQR.N<br>R.QFIADNYPALR.G<br>K.TWTTLAQHADWGFLLR.T<br>K.QQEGISFLIDMK.S<br>R.TELDGDKPLLANPFFK.R<br>K.SPGITVRIITLGEHEVNEWLEDVR.V<br>R.FWSEETAR.A<br>R.DGDHYVNGQK.T<br>R.TGIAGVAASK.R<br>R.GFEGDNEHPGDPYHR.A<br>K.GWIAPAWPEYGGTWTPTQR.F<br>K.VIGIEPYLPTVIAGGALK.A<br>K.LHEGTEVGTQR.K<br>R.ASEIYFENVAIRDALLGGEGALPLIER.I<br>R.FVGNAIQTHGGIGITQELAIHYFR.K<br>R.DKDGISFLIDAK.L<br>K.SVVYAAPWATHLLVTAR.S<br>K.DGAGFVLNGHK.S<br>K.AVGGQADAMPEIAGNMIVAFAYAEQGR.Y<br>K.KDGAQFVLNGHK.S<br>R.RGEGWILTR<br>R.VAHRDGDPPVVEAGGAR.I<br>R.GALLIDKDR.G<br>R.DQSDALQIEGVLLAHR.D<br>R.GAGDSAEDELQDLWMR.L<br>K.VYAAALR.R<br>R.ALVGGLQDVTGNIR.L<br>R.AEAGAEIEETM.K<br>R.VVSGPGVIVDIETLALEGR.A<br>R.VQATEGGHIDFAPLDSIEDAILAR.L<br>R.HILVNDFAVGHAVAQADESYFGR.L<br>K.LITTHPQGLFGAAAFAR.Q<br>R.LTGPDELPATGTSVIGPGTGLGVAHIWR.D<br>R.FTNWPIIRPALIGEK.L<br>K.DHASFTAWQDFEGR.Q<br>R.SLGEATLHTK.D<br>K.GRFEFMAALPK.L<br>K.AIWAAALSGLDLSLAAAAADR.F<br>R.AVALIAGPTR.G<br>R.AVTPLDKAIWAAALSGLDLSLAAAAADR.F<br>R.FAIAIEGGR.V<br>R.LTGPDELPATGTSVIGPGTGLGVAHIWRDESGR.V<br>R.SLGEATLHTKDHASFTAWQDFEGR.Q<br>R.FTNWPIIR.P<br>R.FEGFMAALPK.L<br>R.MREQIVTDIGGTHAR.F<br>R.EQIVTDIGGTHAR.F<br>R.AVALIAGPTRGEIIR.F<br>R.DESGVRVQATEGGHIDFAPLDSIEDAILAR.L<br>K.GRFEFMAALPK.L<br>R.LDQVLLTSPSIVPEPAR.Y<br>R.SQTYFHLLGR.A<br>R.TIGVETAQVMNR.Y<br>R.DTAANDELLR.H<br>K.GLSSGVLPISATVTSHVVEVLK.T<br>K.ALATLNDIHPVGETR.S<br>R.SIGLLGAVEIVADK.T<br>K.TGGDFVHGTYSGHPVAAVALR.N<br>R.TGNVTGPHLAK.A<br>R.SIGLLGAVEIVADKTTT.A<br>R.LPHIFFNAGSEANDTVFR.M<br>R.FGGAETGAPMAR.D<br>R.LITTHAEGCYTIDGGGHR.I<br>R.WNAYHGSTVAGVSLGGMK.A<br>R.KYGLLLVADEVICGFR.T<br>R.FGGAETGAPMAR.D<br>K.YGLLLVADEVICGFR.T<br>K.AMHAGQDLPVGVVHVR.Q<br>K.VAASIDDIGAASK.A<br>K.AAGVVDAAVTPR.Y<br>R.AAAEDAPDGHNFAR.G<br>K.VLLLEPLSALDAK.L<br>R.HDQEDFTWDDR.V<br>K.VYLNHGVTPHGDVWVALRPEK.I<br>R.FNPELQVFEAFTR.V<br>K.SVNETLPADVATIER.M<br>K.VLFDSPYAGR.I<br>R.IAWLSEAGDMFR.L<br>K.NNPVIFPPADVLA.C<br>K.KFHEDDQDQLLK.G<br>K.AGNPGYDVIWPSNDFVER.M<br>K.HITETLTPNAAAK.A<br>K.NIDAAVINVEYDLQR.K<br>K.FHEDDQDQLLK.G<br>K.SKVSATPDSWK.V<br>K.NAHAFINVIDANVDKHTITETLYPTNAAAK.A<br>K.NAHAFINVIDANVDK.H<br>K.FKAGNPGYDVIWPSNDFVER.M<br>K.FSMPYTWLALIGYR.K<br>K.EGSQLNSDNLCPK.G<br>K.TLANGEEAR.L<br>K.NIDAAVINVEYDLQRK.F<br>K.ADMMLPLDHSPLPNKK.N<br>R.NLLGDFFETIYAK.D<br>R.LPGADSNPYLAIASLVCYIGMVD.R<br>R.TAATLDFAPTFQLGHPPLFELQRL<br>R.IFFTNSGSESVDTALK.I |
| YP_616149 | Sala_1099 | L-carnitine dehydratase/bile acid-inducible protein F     | 35.71%            | 7                       |                                                                                                                                                                                                                                                                                                                                                                                                                                                                                                                                                                                                                                                                                                                                                                                                                                                                                                                                                                                                                                                                                                                                                                                                                                                                                                                                                                                                                                                                                                                                                                                                                                                                                                                                                                                                                                                                                                                                                                                                                                                                                                                                                                                                                                                                                                                                                                                                                                                                                                                                                                                                                                                                                                                                                                                                                                                                                                                                                                                                                                                                                                                                                                                                                                                                                                                                  |
| YP_616150 | Sala_1100 | glutathione S-transferase-like protein                    | 58.70%            | 16                      |                                                                                                                                                                                                                                                                                                                                                                                                                                                                                                                                                                                                                                                                                                                                                                                                                                                                                                                                                                                                                                                                                                                                                                                                                                                                                                                                                                                                                                                                                                                                                                                                                                                                                                                                                                                                                                                                                                                                                                                                                                                                                                                                                                                                                                                                                                                                                                                                                                                                                                                                                                                                                                                                                                                                                                                                                                                                                                                                                                                                                                                                                                                                                                                                                                                                                                                                  |
| YP_616154 | Sala_1104 | acyl-CoA dehydrogenase-like protein                       | 46.60%            | 13                      |                                                                                                                                                                                                                                                                                                                                                                                                                                                                                                                                                                                                                                                                                                                                                                                                                                                                                                                                                                                                                                                                                                                                                                                                                                                                                                                                                                                                                                                                                                                                                                                                                                                                                                                                                                                                                                                                                                                                                                                                                                                                                                                                                                                                                                                                                                                                                                                                                                                                                                                                                                                                                                                                                                                                                                                                                                                                                                                                                                                                                                                                                                                                                                                                                                                                                                                                  |
| YP_616155 | Sala_1105 | acyl-CoA dehydrogenase-like protein                       | 41.95%            | 9                       |                                                                                                                                                                                                                                                                                                                                                                                                                                                                                                                                                                                                                                                                                                                                                                                                                                                                                                                                                                                                                                                                                                                                                                                                                                                                                                                                                                                                                                                                                                                                                                                                                                                                                                                                                                                                                                                                                                                                                                                                                                                                                                                                                                                                                                                                                                                                                                                                                                                                                                                                                                                                                                                                                                                                                                                                                                                                                                                                                                                                                                                                                                                                                                                                                                                                                                                                  |
| YP_616157 | Sala_1107 | putative FecR                                             | 11.25%            | 3                       |                                                                                                                                                                                                                                                                                                                                                                                                                                                                                                                                                                                                                                                                                                                                                                                                                                                                                                                                                                                                                                                                                                                                                                                                                                                                                                                                                                                                                                                                                                                                                                                                                                                                                                                                                                                                                                                                                                                                                                                                                                                                                                                                                                                                                                                                                                                                                                                                                                                                                                                                                                                                                                                                                                                                                                                                                                                                                                                                                                                                                                                                                                                                                                                                                                                                                                                                  |
| YP_616158 | Sala_1108 | RNA polymerase, sigma-24 subunit, ECF subfamily           | 24.28%            | 3                       |                                                                                                                                                                                                                                                                                                                                                                                                                                                                                                                                                                                                                                                                                                                                                                                                                                                                                                                                                                                                                                                                                                                                                                                                                                                                                                                                                                                                                                                                                                                                                                                                                                                                                                                                                                                                                                                                                                                                                                                                                                                                                                                                                                                                                                                                                                                                                                                                                                                                                                                                                                                                                                                                                                                                                                                                                                                                                                                                                                                                                                                                                                                                                                                                                                                                                                                                  |
| YP_616159 | Sala_1109 | Autotransporter beta-domain                               | 2.52%             | 2                       |                                                                                                                                                                                                                                                                                                                                                                                                                                                                                                                                                                                                                                                                                                                                                                                                                                                                                                                                                                                                                                                                                                                                                                                                                                                                                                                                                                                                                                                                                                                                                                                                                                                                                                                                                                                                                                                                                                                                                                                                                                                                                                                                                                                                                                                                                                                                                                                                                                                                                                                                                                                                                                                                                                                                                                                                                                                                                                                                                                                                                                                                                                                                                                                                                                                                                                                                  |
| YP_616160 | Sala_1110 | Glucokinase                                               | 78.33%            | 22                      |                                                                                                                                                                                                                                                                                                                                                                                                                                                                                                                                                                                                                                                                                                                                                                                                                                                                                                                                                                                                                                                                                                                                                                                                                                                                                                                                                                                                                                                                                                                                                                                                                                                                                                                                                                                                                                                                                                                                                                                                                                                                                                                                                                                                                                                                                                                                                                                                                                                                                                                                                                                                                                                                                                                                                                                                                                                                                                                                                                                                                                                                                                                                                                                                                                                                                                                                  |
| YP_616161 | Sala_1111 | peptidase C26                                             | 20.33%            | 4                       |                                                                                                                                                                                                                                                                                                                                                                                                                                                                                                                                                                                                                                                                                                                                                                                                                                                                                                                                                                                                                                                                                                                                                                                                                                                                                                                                                                                                                                                                                                                                                                                                                                                                                                                                                                                                                                                                                                                                                                                                                                                                                                                                                                                                                                                                                                                                                                                                                                                                                                                                                                                                                                                                                                                                                                                                                                                                                                                                                                                                                                                                                                                                                                                                                                                                                                                                  |
|           | Sala_1112 | aminotransferase class-III                                | 36.61%            | 14                      |                                                                                                                                                                                                                                                                                                                                                                                                                                                                                                                                                                                                                                                                                                                                                                                                                                                                                                                                                                                                                                                                                                                                                                                                                                                                                                                                                                                                                                                                                                                                                                                                                                                                                                                                                                                                                                                                                                                                                                                                                                                                                                                                                                                                                                                                                                                                                                                                                                                                                                                                                                                                                                                                                                                                                                                                                                                                                                                                                                                                                                                                                                                                                                                                                                                                                                                                  |
| YP_616162 | Sala_1113 | protein of unknown function DUF808                        | 9.32%             | 2                       |                                                                                                                                                                                                                                                                                                                                                                                                                                                                                                                                                                                                                                                                                                                                                                                                                                                                                                                                                                                                                                                                                                                                                                                                                                                                                                                                                                                                                                                                                                                                                                                                                                                                                                                                                                                                                                                                                                                                                                                                                                                                                                                                                                                                                                                                                                                                                                                                                                                                                                                                                                                                                                                                                                                                                                                                                                                                                                                                                                                                                                                                                                                                                                                                                                                                                                                                  |
| YP_616163 | Sala_1114 | spermidine/putrescine ABC transporter ATP-binding subunit | 16.49%            | 4                       |                                                                                                                                                                                                                                                                                                                                                                                                                                                                                                                                                                                                                                                                                                                                                                                                                                                                                                                                                                                                                                                                                                                                                                                                                                                                                                                                                                                                                                                                                                                                                                                                                                                                                                                                                                                                                                                                                                                                                                                                                                                                                                                                                                                                                                                                                                                                                                                                                                                                                                                                                                                                                                                                                                                                                                                                                                                                                                                                                                                                                                                                                                                                                                                                                                                                                                                                  |
| YP_616166 | Sala_1117 | extracellular solute-binding protein, family 1            | 57.88%            | 19                      |                                                                                                                                                                                                                                                                                                                                                                                                                                                                                                                                                                                                                                                                                                                                                                                                                                                                                                                                                                                                                                                                                                                                                                                                                                                                                                                                                                                                                                                                                                                                                                                                                                                                                                                                                                                                                                                                                                                                                                                                                                                                                                                                                                                                                                                                                                                                                                                                                                                                                                                                                                                                                                                                                                                                                                                                                                                                                                                                                                                                                                                                                                                                                                                                                                                                                                                                  |
| YP_616170 | Sala_1121 | Glutamate--ammonia ligase                                 | 9.15%             | 2                       |                                                                                                                                                                                                                                                                                                                                                                                                                                                                                                                                                                                                                                                                                                                                                                                                                                                                                                                                                                                                                                                                                                                                                                                                                                                                                                                                                                                                                                                                                                                                                                                                                                                                                                                                                                                                                                                                                                                                                                                                                                                                                                                                                                                                                                                                                                                                                                                                                                                                                                                                                                                                                                                                                                                                                                                                                                                                                                                                                                                                                                                                                                                                                                                                                                                                                                                                  |
| YP_616171 | Sala_1122 | aminotransferase class-III                                | 40.64%            | 9                       |                                                                                                                                                                                                                                                                                                                                                                                                                                                                                                                                                                                                                                                                                                                                                                                                                                                                                                                                                                                                                                                                                                                                                                                                                                                                                                                                                                                                                                                                                                                                                                                                                                                                                                                                                                                                                                                                                                                                                                                                                                                                                                                                                                                                                                                                                                                                                                                                                                                                                                                                                                                                                                                                                                                                                                                                                                                                                                                                                                                                                                                                                                                                                                                                                                                                                                                                  |

| Accession | Locus tag | Description                                             | Sequence coverage | No. peptides identified | List of peptides identified                                                                                                                                                                                                                                                                                                                                                                                                                                                                                                                                                                                                                                                                                                                                                                                                                                                                                                                                                                                                                                                                                                                                                                                                                                                                                                                                                                                                                                                                                                                                                                                                                                                                                                                                                                                                                                                                                                                                                                                                                                                                                                                                                                                                                                                                                                                                                                                                                                                                                                                                                                                                                                                                                                                                                                                                                                                                                                                                                                                                                                                                                                                                                                                                                                                                                                                                                                                                                                                                                                                                                        |
|-----------|-----------|---------------------------------------------------------|-------------------|-------------------------|------------------------------------------------------------------------------------------------------------------------------------------------------------------------------------------------------------------------------------------------------------------------------------------------------------------------------------------------------------------------------------------------------------------------------------------------------------------------------------------------------------------------------------------------------------------------------------------------------------------------------------------------------------------------------------------------------------------------------------------------------------------------------------------------------------------------------------------------------------------------------------------------------------------------------------------------------------------------------------------------------------------------------------------------------------------------------------------------------------------------------------------------------------------------------------------------------------------------------------------------------------------------------------------------------------------------------------------------------------------------------------------------------------------------------------------------------------------------------------------------------------------------------------------------------------------------------------------------------------------------------------------------------------------------------------------------------------------------------------------------------------------------------------------------------------------------------------------------------------------------------------------------------------------------------------------------------------------------------------------------------------------------------------------------------------------------------------------------------------------------------------------------------------------------------------------------------------------------------------------------------------------------------------------------------------------------------------------------------------------------------------------------------------------------------------------------------------------------------------------------------------------------------------------------------------------------------------------------------------------------------------------------------------------------------------------------------------------------------------------------------------------------------------------------------------------------------------------------------------------------------------------------------------------------------------------------------------------------------------------------------------------------------------------------------------------------------------------------------------------------------------------------------------------------------------------------------------------------------------------------------------------------------------------------------------------------------------------------------------------------------------------------------------------------------------------------------------------------------------------------------------------------------------------------------------------------------------|
|           |           |                                                         |                   |                         | R.ASELGAYWEDAHSK.G<br>R.VGGATASQMWGVTPDIITMAK.G<br>R.HGILLIFDEVITAFGR.V<br>R.LVLDLHGAETIAAVVPEPMAGSTGVLPVPPVGLSR.L<br>R.GDNQQLASFWMPETANR.A<br>R.ATGDIIALSPLIVEK.E<br>K.EQDAMFGTIADLDRID.<br>R.WVDQEKDPLLVADNVVAIANDAAIR.L<br>R.HTTTQLQSEASARK.D<br>R.GAEMPEFVHFDPLMYQGSSDAFLAPR.D<br>R.NLGGAGTIGSGTVSNR.D<br>R.ADAGVDMTFDGLQIAHAAK.T<br>K.VLLVGLTNDVSLR.G<br>K.GGFFQSKPSSAMSPVFTPDALGDQWK.D<br>R.EKVLVGLTNDVSLR.G<br>R.GAEMPEFVHFDPLMYQGSSDAFLAPR.D<br>R.LAALAEIDLHDAIPK.F<br>R.LAALAEIDLHDAIPK.E<br>R.HHSIFGAIQTV.A<br>R.DADGGPKPVSEGLGYSCLAEVR.T<br>K.PSSAMSPVFTPDALGDQWK.D<br>K.GGFFQSKPSSAMSPVFTPDALGDQWK.D<br>R.GAEMPEFVHFDPLMYQGSSDAFLAPR.D<br>R.GAEMPEFVHFDPLMYQGSSDAFLAPR.D<br>K.GGFFQSK.P<br>R.DLLSSGQDYLLKPLSLDQVR.E<br>K.FQSAIGELSR.K<br>R.LLDGADVVESEVAASAK.S<br>R.GGVGASVATSLAWAISEQADR.Q<br>R.AIDIVIPFDPK.L<br>R.VLLVANKFQSAIGELSR.K<br>R.QVLPFFHLVSEAGTILLVSDVTLAAAR.D<br>R.NAFEMTIVDIPR.Q<br>R.GLIDADNPSR.I<br>R.ASDKLSLSAEAPHQVMTDGSAFFQLEELR.N<br>R.VAIEDPSLYGASSAQTVR.A<br>R.DTGHDPVAATR.A<br>R.NSIYQFDVAAK.D<br>K.DVPVTTGAVPDGHIR.V<br>R.SLESVHPVVR.N<br>R.LQQGWFDMGIR.Y<br>R.TKPTGAGELTK.T<br>R.YGDRVAIEDPSLYGASSAQTVR.A<br>K.DGELPPSEQGR.L<br>K.APGETSIYATDASGR.V<br>R.DTDGFLNGFLGFFVGR.Q<br>R.SPDDAAEAE.L<br>R.VRPEVSELSTEGAIEMQGFQIPALTIR.R<br>R.LVQAFVGDQTK.V<br>R.LDSNVGDADRPR.G<br>K.MPGLGDVPLLTGTFK.S<br>R.SPDDAAEAE.LVQAFVGDQTK.V<br>K.VYVSLAYPTVLSNGR.I<br>R.TATPLQVNLQVR.I<br>R.SIGAIKMPGLGDVPLLTGTFK.S<br>R.VRPEVSELSTEGAIEMQGFQIPALTIR.R<br>R.SGLVATLAQNLTAISGETADFLAGGEFVPIPGNFAGTTIEYR.K<br>R.RGETELVVTPVLPVPSANDIK.L<br>R.QAGTITTDANGNTSITTPGTR.S<br>R.LLISLPAASVDFVADKVDVQVR.S<br>R.GGSSDASPGFSIK.<br>R.YDAEEDTKTPVR.T<br>R.TFGSVTLEATPEIAEK.I<br>R.QLPVGTIVGPDVSR.F<br>R.PLAESAGELDAIASGEIIVPASGGTAAER.K<br>R.LLALRALAESAGELDAIASGEIIVPASGGTAAER.K<br>R.HPTTAGQPLTQALVHNDR.G<br>R.ADLLVNAAGAWADQVAASGVAPVGIQPR.R<br>R.IWLTPHDETVPDHPDVPVEIDVATAIDR.L<br>R.SAAFVHESVGGAGVQPLTR.A<br>R.LQSVVDVPAALER.K<br>K.VNSETIFWTEYSSK.A<br>K.NGPGAEREVE.<br>K.VGEFVAFK.Y<br>K.NKVGEFVAFK.Y<br>K.NAIESIQKNGPGAEREVE.<br>K.NAIESIQ.N<br>K.TLSSGEADTTNMR.M<br>K.KPVANADLQRL.L<br>K.GNPGGGWAVLR.W<br>K.GHAGHDNELADQLASDAALK.M<br>K.GIAEUVENSFLLETR.G<br>R.EVALTDEEFAALPLAR.G<br>R.DLPAHVHADLPDNLMLGER.V<br>R.VSEGDLPFFVELLDHLAK.R<br>R.AVADFAGAR.E<br>R.AYDVAVTHASWTFSTGSDCDIGR.A<br>R.AHDWIHTPPGALVTR.K<br>K.RVSEGLPFFVELLDHLAK.R<br>R.MIVGAPSSNSLR.L<br>R.IVELALER.F<br>R.GHDVDPAWLDSIGTLGITAGASAPETLVR.E<br>R.EVIDAVSARVIVEDVVAEENMVFK.L<br>K.GAIFVESLDQPDGVPVFSAHGVK.A<br>R.HRPAIAGR.G<br>R.EVIDAVSARVIVEDVVAEENMVFK.L<br>R.TVTLPHYATVQGGTAVAK.K<br>R.LGNVAVTFAEQTR.G<br>R.AQASAYDR.A<br>R.RPGDQDAIDPLSLPEVR.A<br>K.RLGNVAVTFAEQTR.G<br>R.AAATLPDIQER.I<br>R.DNIEELAGVGTATR.T<br>R.TACPAVAVPLHTGDTLFDPTQTSR.D<br>K.VYQLANFDVATR.R<br>K.RRPGDQDAIDPLSLPEVR.A<br>R.TACPAVAVPLHTGDTLFDPTQTSR.DAR.A<br>R.GAVVGDALALLEYAGHEVIR.E<br>R.LYLDAGSQIR.N<br>R.FAAAPESAWLALFR.A<br>R.YREALGEEVGAIPGLYPGDYLPVGEK.L<br>R.LADDSWREELALHDLR.G<br>R.EQGLVYDGLLEAPKGETPEDWEPVELPLFR.S<br>R.IVLNDPELTATR.L<br>K.GETPEDWEPVELPLFR.S<br>R.AGNFVLADVVDEVKDAVR.F<br>R.EQGLVYDGLLEAPK.G<br>R.DNPWWYLQYANAR.I<br>R.IVEAAAFAR.E<br>R.EYVNDAGAQQVDVLR.S<br>K.AVAALTEGK.T<br>R.EALGEEVGAIPGLYPGDYLPVGEK.L<br>R.STQFGDDQDRPIR.K<br>R.FSDHIGALDALAAR.D<br>K.AADAGIVLPAPAPER.L<br>K.LGHHDIPSSAELOQAAGKPAAEK.L<br>R.IAFVADVAFAAFHAWYHLGNDSAAAR.I<br>R.SAVSEPRDDAAGDITATMAAMVLAAS.K<br>R.KAADAGIVLPAPAPER.L<br>K.SETADELIDWADHAGTVK.R<br>K.SDGSWTFYFADLAVHFQK.S<br>R.KSDGSWTFYFADLAVHFQK.S<br>R.KADAQMDFFAR.V<br>R.ANELALVK.L<br>R.LRANELALVK.L<br>K.SETADELIDWADHAGTVK.R<br>K.LAAEHGDR.F |
| YP_616172 | Sala_1123 | periplasmic sensor signal transduction histidine kinase | 8.51%             | 2                       |                                                                                                                                                                                                                                                                                                                                                                                                                                                                                                                                                                                                                                                                                                                                                                                                                                                                                                                                                                                                                                                                                                                                                                                                                                                                                                                                                                                                                                                                                                                                                                                                                                                                                                                                                                                                                                                                                                                                                                                                                                                                                                                                                                                                                                                                                                                                                                                                                                                                                                                                                                                                                                                                                                                                                                                                                                                                                                                                                                                                                                                                                                                                                                                                                                                                                                                                                                                                                                                                                                                                                                                    |
| YP_616173 | Sala_1124 | fumarylacetoacetate (FAA) hydrolase                     | 53.15%            | 16                      |                                                                                                                                                                                                                                                                                                                                                                                                                                                                                                                                                                                                                                                                                                                                                                                                                                                                                                                                                                                                                                                                                                                                                                                                                                                                                                                                                                                                                                                                                                                                                                                                                                                                                                                                                                                                                                                                                                                                                                                                                                                                                                                                                                                                                                                                                                                                                                                                                                                                                                                                                                                                                                                                                                                                                                                                                                                                                                                                                                                                                                                                                                                                                                                                                                                                                                                                                                                                                                                                                                                                                                                    |
| YP_616176 | Sala_1127 | response regulator receiver protein                     | 41.00%            | 10                      |                                                                                                                                                                                                                                                                                                                                                                                                                                                                                                                                                                                                                                                                                                                                                                                                                                                                                                                                                                                                                                                                                                                                                                                                                                                                                                                                                                                                                                                                                                                                                                                                                                                                                                                                                                                                                                                                                                                                                                                                                                                                                                                                                                                                                                                                                                                                                                                                                                                                                                                                                                                                                                                                                                                                                                                                                                                                                                                                                                                                                                                                                                                                                                                                                                                                                                                                                                                                                                                                                                                                                                                    |
| YP_616177 | Sala_1128 | hypothetical protein                                    | 49.30%            | 9                       |                                                                                                                                                                                                                                                                                                                                                                                                                                                                                                                                                                                                                                                                                                                                                                                                                                                                                                                                                                                                                                                                                                                                                                                                                                                                                                                                                                                                                                                                                                                                                                                                                                                                                                                                                                                                                                                                                                                                                                                                                                                                                                                                                                                                                                                                                                                                                                                                                                                                                                                                                                                                                                                                                                                                                                                                                                                                                                                                                                                                                                                                                                                                                                                                                                                                                                                                                                                                                                                                                                                                                                                    |
| YP_616178 | Sala_1129 | type II and III secretion system protein                | 55.17%            | 17                      |                                                                                                                                                                                                                                                                                                                                                                                                                                                                                                                                                                                                                                                                                                                                                                                                                                                                                                                                                                                                                                                                                                                                                                                                                                                                                                                                                                                                                                                                                                                                                                                                                                                                                                                                                                                                                                                                                                                                                                                                                                                                                                                                                                                                                                                                                                                                                                                                                                                                                                                                                                                                                                                                                                                                                                                                                                                                                                                                                                                                                                                                                                                                                                                                                                                                                                                                                                                                                                                                                                                                                                                    |
| YP_616179 | Sala_1130 | Flp pilus assembly CpaB                                 | 28.70%            | 6                       |                                                                                                                                                                                                                                                                                                                                                                                                                                                                                                                                                                                                                                                                                                                                                                                                                                                                                                                                                                                                                                                                                                                                                                                                                                                                                                                                                                                                                                                                                                                                                                                                                                                                                                                                                                                                                                                                                                                                                                                                                                                                                                                                                                                                                                                                                                                                                                                                                                                                                                                                                                                                                                                                                                                                                                                                                                                                                                                                                                                                                                                                                                                                                                                                                                                                                                                                                                                                                                                                                                                                                                                    |
| YP_616181 | Sala_1132 | FAD dependent oxidoreductase                            | 24.20%            | 4                       |                                                                                                                                                                                                                                                                                                                                                                                                                                                                                                                                                                                                                                                                                                                                                                                                                                                                                                                                                                                                                                                                                                                                                                                                                                                                                                                                                                                                                                                                                                                                                                                                                                                                                                                                                                                                                                                                                                                                                                                                                                                                                                                                                                                                                                                                                                                                                                                                                                                                                                                                                                                                                                                                                                                                                                                                                                                                                                                                                                                                                                                                                                                                                                                                                                                                                                                                                                                                                                                                                                                                                                                    |
| YP_616182 | Sala_1133 | protein of unknown function DUF1508                     | 63.86%            | 6                       |                                                                                                                                                                                                                                                                                                                                                                                                                                                                                                                                                                                                                                                                                                                                                                                                                                                                                                                                                                                                                                                                                                                                                                                                                                                                                                                                                                                                                                                                                                                                                                                                                                                                                                                                                                                                                                                                                                                                                                                                                                                                                                                                                                                                                                                                                                                                                                                                                                                                                                                                                                                                                                                                                                                                                                                                                                                                                                                                                                                                                                                                                                                                                                                                                                                                                                                                                                                                                                                                                                                                                                                    |
| YP_616183 | Sala_1134 | ribonuclease H                                          | 38.67%            | 4                       |                                                                                                                                                                                                                                                                                                                                                                                                                                                                                                                                                                                                                                                                                                                                                                                                                                                                                                                                                                                                                                                                                                                                                                                                                                                                                                                                                                                                                                                                                                                                                                                                                                                                                                                                                                                                                                                                                                                                                                                                                                                                                                                                                                                                                                                                                                                                                                                                                                                                                                                                                                                                                                                                                                                                                                                                                                                                                                                                                                                                                                                                                                                                                                                                                                                                                                                                                                                                                                                                                                                                                                                    |
| YP_616184 | Sala_1135 | homoserine kinase                                       | 38.44%            | 8                       |                                                                                                                                                                                                                                                                                                                                                                                                                                                                                                                                                                                                                                                                                                                                                                                                                                                                                                                                                                                                                                                                                                                                                                                                                                                                                                                                                                                                                                                                                                                                                                                                                                                                                                                                                                                                                                                                                                                                                                                                                                                                                                                                                                                                                                                                                                                                                                                                                                                                                                                                                                                                                                                                                                                                                                                                                                                                                                                                                                                                                                                                                                                                                                                                                                                                                                                                                                                                                                                                                                                                                                                    |
| YP_616185 | Sala_1136 | hydroxymethylbutenyl pyrophosphate reductase            | 34.97%            | 7                       |                                                                                                                                                                                                                                                                                                                                                                                                                                                                                                                                                                                                                                                                                                                                                                                                                                                                                                                                                                                                                                                                                                                                                                                                                                                                                                                                                                                                                                                                                                                                                                                                                                                                                                                                                                                                                                                                                                                                                                                                                                                                                                                                                                                                                                                                                                                                                                                                                                                                                                                                                                                                                                                                                                                                                                                                                                                                                                                                                                                                                                                                                                                                                                                                                                                                                                                                                                                                                                                                                                                                                                                    |
| YP_616186 | Sala_1137 | hypothetical protein                                    | 58.74%            | 11                      |                                                                                                                                                                                                                                                                                                                                                                                                                                                                                                                                                                                                                                                                                                                                                                                                                                                                                                                                                                                                                                                                                                                                                                                                                                                                                                                                                                                                                                                                                                                                                                                                                                                                                                                                                                                                                                                                                                                                                                                                                                                                                                                                                                                                                                                                                                                                                                                                                                                                                                                                                                                                                                                                                                                                                                                                                                                                                                                                                                                                                                                                                                                                                                                                                                                                                                                                                                                                                                                                                                                                                                                    |
| YP_616187 | Sala_1138 | arginyl-tRNA synthetase                                 | 76.00%            | 34                      |                                                                                                                                                                                                                                                                                                                                                                                                                                                                                                                                                                                                                                                                                                                                                                                                                                                                                                                                                                                                                                                                                                                                                                                                                                                                                                                                                                                                                                                                                                                                                                                                                                                                                                                                                                                                                                                                                                                                                                                                                                                                                                                                                                                                                                                                                                                                                                                                                                                                                                                                                                                                                                                                                                                                                                                                                                                                                                                                                                                                                                                                                                                                                                                                                                                                                                                                                                                                                                                                                                                                                                                    |



| Accession | Locus tag | Description                                           | Sequence coverage | No. peptides identified | List of peptides identified                                                                                                                                                                                                                                                                                                                                                                                                                                                                                                                                                                                                                                                                                                                                                                                                                                                                                                                                                                                                                                                                                                                                                                                                                                                                                                                                                                                                                                                                                                                                                                                                                                                                                                                                                                                                                                                                                                                                                                                                                                                                                                                                                                                                                                                                                                                                                                                                                                                                                                                                                                                                                                                                                                                                                                                                                                                                                                                                                                                                                                                                                                                                                                                                                                                                       |
|-----------|-----------|-------------------------------------------------------|-------------------|-------------------------|---------------------------------------------------------------------------------------------------------------------------------------------------------------------------------------------------------------------------------------------------------------------------------------------------------------------------------------------------------------------------------------------------------------------------------------------------------------------------------------------------------------------------------------------------------------------------------------------------------------------------------------------------------------------------------------------------------------------------------------------------------------------------------------------------------------------------------------------------------------------------------------------------------------------------------------------------------------------------------------------------------------------------------------------------------------------------------------------------------------------------------------------------------------------------------------------------------------------------------------------------------------------------------------------------------------------------------------------------------------------------------------------------------------------------------------------------------------------------------------------------------------------------------------------------------------------------------------------------------------------------------------------------------------------------------------------------------------------------------------------------------------------------------------------------------------------------------------------------------------------------------------------------------------------------------------------------------------------------------------------------------------------------------------------------------------------------------------------------------------------------------------------------------------------------------------------------------------------------------------------------------------------------------------------------------------------------------------------------------------------------------------------------------------------------------------------------------------------------------------------------------------------------------------------------------------------------------------------------------------------------------------------------------------------------------------------------------------------------------------------------------------------------------------------------------------------------------------------------------------------------------------------------------------------------------------------------------------------------------------------------------------------------------------------------------------------------------------------------------------------------------------------------------------------------------------------------------------------------------------------------------------------------------------------------|
| YP_616188 | Sala_1139 | Sporulation related                                   | 33.88%            | 5                       | R.RFSDHIGALDALAAR.D<br>R.ALADLLAVELGALDEVVAGVAGPGFINLR.L<br>R.AEAVGAMDMIR.A<br>K.LLGHHDIFSSAELQAAGK.P<br>R.VISPATVGGSTVYR.L<br>R.FAYLADLNR.V<br>K.TFEGEGDASFSAEAGAAGPK.V<br>R.VAGENCIVR.                                                                                                                                                                                                                                                                                                                                                                                                                                                                                                                                                                                                                                                                                                                                                                                                                                                                                                                                                                                                                                                                                                                                                                                                                                                                                                                                                                                                                                                                                                                                                                                                                                                                                                                                                                                                                                                                                                                                                                                                                                                                                                                                                                                                                                                                                                                                                                                                                                                                                                                                                                                                                                                                                                                                                                                                                                                                                                                                                                                                                                                                                                          |
| YP_616189 | Sala_1140 | Beta-N-acetylhexosaminidase                           | 37.61%            | 11                      | K.AAASEAAAPGDAMIQLGAFSSEGAAGK.A<br>R.AILSGLQAGVGVK.H<br>R.APASAEAR.L<br>R.ANPLILIDQEGGR.V<br>R.ALDDTHEALPTVTASDRELQDLAPFAALR.D<br>R.ELQTDLAPFAALR.D<br>R.ALDDTHEALPTVTASDR.E<br>MIPAFGLSGLITLDDR.A<br>R.DCAPAGYILFGR.N<br>R.MDDMIGIANR.L<br>R.IAGARDEGEFAALVDQR.D<br>R.DEGEFAALVDQR.D<br>R.AVIEAIAAR.H<br>R.HAGSGIQLVER.G<br>R.WHFQTPADLAHLR.R<br>R.AAAEVLAIVAYHEPVSRA<br>K.TTDTFLQHFGLSSR.K<br>R.AIEAMLFASDEPLDAR.Q<br>R.APDLSATPTTAETENR.<br>K.QIDAQRAAPDLSATPTTAETENR.<br>K.GMSDDATPTAPK.Q<br>R.DIESVGEAGDR.A<br>R.DIESVGEAGDRAI.<br>K.GVGRDIESVGEAGDR.A<br>R.AAIEDALSFPEESAGR.L<br>R.YALISAIVVDK.A<br>R.DVIGLAEAGEGAAR.E<br>K.PDFRVDVIGLAEAGEGAARERIGR.L<br>R.LRPDLAPLHVER.I<br>R.ISTLAQQGYDGVFHR.V<br>R.FLDNQYVWGEVIEGMEHVDALPK.G<br>R.VIPGFMAQGGDPTGTGMGGSQLPDLQFNFSEPHVR.G<br>K.CEPPREKTIKK.A<br>R.ATLAEDLGAGDITSLATPADAR.F<br>R.AIAETGVYVSGR.L<br>R.QYVDAIAGTGATLDTR.K<br>R.DAITVAGLPIAER.F<br>R.VAQVPELVAGATHLLDNMGLDRLR.T<br>R.SALNTVQHLSGIATMTR.Q<br>R.TSVAIVDGR.V<br>R.QYVDAIAGTGATLDTRK.T<br>R.LTQSPAADIGLDFALA.<br>K.DNHVAVAGSVEEAVR.R<br>R.MSVIPTIAPFLPGLLR.L<br>R.EAEELADMAAASAPLVGELR.M<br>K.DALAFDAIAPVYR.D<br>R.IDKLPTEGLTIVATPLAASLAESIGATGK.D<br>R.QDNALGTLWNMVFQTK.L<br>R.FAAELGGR.A<br>R.FAQGITGCEGYESAAGLVAAR.F<br>R.ALSEPHNITVYR.E<br>R.SDQGSNAVGLLR.E<br>R.SDDAALETQLHPFVR.A<br>R.FTAYFGGDFPFRIPGR.K<br>R.ATGGYDGHDR.L<br>K.VLTAQQWTFERER.V<br>K.VLTAQQWTFER.E<br>R.EWPGIDAPYR.L<br>R.QSVLTSIPFQVKG.S<br>R.GGQGITNIDNIAR.N<br>R.DATAEVVNLQWR.H<br>K.FEGDDEDRLIGVALLDESDDVLLATR.Q<br>R.LYAAQEGGFIPGRPK.K<br>R.EELVAVRDEFATR.R<br>K.TSYLDYAMSVIVSR.A<br>K.DNENEPTLPAER.M<br>R.IEGVADIRDESNR.E<br>R.GRPMINLLAQGETISTVPLPEDESEWGK.L<br>K.TAMVLNLDKDTVDQPNYDASR.E<br>K.DEDVTELVFTSTHTPVLFFSTAGK.V<br>R.LAEGDEVISLSLHR.V<br>R.AAPWKDNEPTLPAER.M<br>R.VGTTGDEREAYLR.A<br>R.STHVIEGRNDR.Q<br>R.NGVPVAFPAQAHQLMLVDQAK.L<br>R.LVIAEGEMEAATYR.L<br>R.AGMATKDEDVTELVFTSTHTPVLFFSTAGK.V<br>R.NSMDAFTNVPNSGK.I<br>K.IVGDVGMGNVHPHGDSAIYDALAR.M<br>K.DILSAFIIFR.E<br>R.STHVIEGR.N<br>R.LFDVAEGEHVSAALLIEDGDEDADDGRDVEASDNPVSEAPTE.<br>R.FAGDDVREFQSR.N<br>R.EQFILTVCANGYK.L<br>R.TLAPAADGIDDEDLIEREMVTVTMDGYIK.R<br>R.LIGVALLDESDDVLLATR.Q<br>R.GRPMINLLAQGETISTVPLPEDESEWGK.L<br>R.DRAHLLGLVAVSNLDEVYR.I<br>R.AHLLGLVAVSNLDEVYR.I<br>R.AGMATKDEDVTELVFTSTHTPVLFFSTAGK.V<br>K.RTPLATFR.A<br>R.TIDALTPAQGR.I<br>R.AVAPGLTVPPIAAANLLR.T<br>R.AVSDADQVTAETGR.<br>R.LGELADYPAFTAGR.L<br>R.EAVGAALPEAAR.T<br>R.TDSGGGSLGIYAR.A<br>R.ITPDEGASLEISDWR.A<br>R.GFASIVDGPATAPK.G<br>R.TASVTATSAGSALQLGR.N<br>R.EIVLVAEPGAVLGEIALLDGGER.T<br>R.VLEPELIDISESEG.<br>R.TADQTIESDR.A<br>K.SWEESGIIALEQGR.V<br>R.TADQTIESDRAYASGPR.L<br>R.LAELQSPDSIFSGLSVEDWAEITR.R<br>K.GKELLVQSDPGDMMLLLETGAR.V<br>R.VELSQTELGNFAGMSR.E<br>K.ELLVQSDPGDMMLLLETGAR.V<br>K.LSPNSHVASYGTNEISER.H<br>K.GLMAASLAALLQAR.G<br>R.AFGILLDAPAPDLTAWYDIMDR.K<br>R.FIFITGGVSSLGK.G<br>K.EAVIPALDADSISVVPQYHGEGLDSEVLR.A<br>R.KQHPEGEVITIGVKG.Y<br>R.NTSGIANASSTFEGPTDEPVVGLITWMSAEGQLQR.R<br>R.K.EAVIPALDADSISVVPQYHGEGLDSEVLR.A<br>K.SKPFDPHPLFAGFIEAIVK.Q<br>R.RGDYLGATVQVPHVTDIAIK.D<br>K.SLNEALVHGGMAHR.V<br>R.IYQGIIAK.E<br>R.GANTDLGGTMR.L<br>R.DNAISVHVTLPYIAAAGELK.T<br>K.QHPEGEVITIGVKG.Y<br>R.YEVNGAYR.E<br>R.WLDAEMEREDLVANLEPHLIGLVPGGFGR.G<br>R.RGDYLGATVQVPHVTDIAIKDFAR.A<br>R.HRYEVNGAYR.E<br>K.GLMAASLAALLQAR.G |
| YP_616191 | Sala_1142 | putative transcriptional regulator                    | 41.12%            | 6                       | R.AVIEAIAAR.H<br>R.HAGSGIQLVER.G<br>R.WHFQTPADLAHLR.R<br>R.AAAEVLAIVAYHEPVSRA<br>K.TTDTFLQHFGLSSR.K<br>R.AIEAMLFASDEPLDAR.Q<br>R.APDLSATPTTAETENR.<br>K.QIDAQRAAPDLSATPTTAETENR.<br>K.GMSDDATPTAPK.Q<br>R.DIESVGEAGDR.A<br>R.DIESVGEAGDRAI.<br>K.GVGRDIESVGEAGDR.A<br>R.AAIEDALSFPEESAGR.L<br>R.YALISAIVVDK.A<br>R.DVIGLAEAGEGAAR.E<br>K.PDFRVDVIGLAEAGEGAARERIGR.L<br>R.LRPDLAPLHVER.I<br>R.ISTLAQQGYDGVFHR.V<br>R.FLDNQYVWGEVIEGMEHVDALPK.G<br>R.VIPGFMAQGGDPTGTGMGGSQLPDLQFNFSEPHVR.G<br>K.CEPPREKTIKK.A<br>R.ATLAEDLGAGDITSLATPADAR.F<br>R.AIAETGVYVSGR.L<br>R.QYVDAIAGTGATLDTR.K<br>R.DAITVAGLPIAER.F<br>R.VAQVPELVAGATHLLDNMGLDRLR.T<br>R.SALNTVQHLSGIATMTR.Q<br>R.TSVAIVDGR.V<br>R.QYVDAIAGTGATLDTRK.T<br>R.LTQSPAADIGLDFALA.<br>K.DNHVAVAGSVEEAVR.R<br>R.MSVIPTIAPFLPGLLR.L<br>R.EAEELADMAAASAPLVGELR.M<br>K.DALAFDAIAPVYR.D<br>R.IDKLPTEGLTIVATPLAASLAESIGATGK.D<br>R.QDNALGTLWNMVFQTK.L<br>R.FAAELGGR.A<br>R.FAQGITGCEGYESAAGLVAAR.F<br>R.ALSEPHNITVYR.E<br>R.SDQGSNAVGLLR.E<br>R.SDDAALETQLHPFVR.A<br>R.FTAYFGGDFPFRIPGR.K<br>R.ATGGYDGHDR.L<br>K.VLTAQQWTFERER.V<br>K.VLTAQQWTFER.E<br>R.EWPGIDAPYR.L<br>R.QSVLTSIPFQVKG.S<br>R.GGQGITNIDNIAR.N<br>R.DATAEVVNLQWR.H<br>K.FEGDDEDRLIGVALLDESDDVLLATR.Q<br>R.LYAAQEGGFIPGRPK.K<br>R.EELVAVRDEFATR.R<br>K.TSYLDYAMSVIVSR.A<br>K.DNENEPTLPAER.M<br>R.IEGVADIRDESNR.E<br>R.GRPMINLLAQGETISTVPLPEDESEWGK.L<br>K.TAMVLNLDKDTVDQPNYDASR.E<br>K.DEDVTELVFTSTHTPVLFFSTAGK.V<br>R.LAEGDEVISLSLHR.V<br>R.AAPWKDNEPTLPAER.M<br>R.VGTTGDEREAYLR.A<br>R.STHVIEGRNDR.Q<br>R.NGVPVAFPAQAHQLMLVDQAK.L<br>R.LVIAEGEMEAATYR.L<br>R.AGMATKDEDVTELVFTSTHTPVLFFSTAGK.V<br>R.NSMDAFTNVPNSGK.I<br>K.IVGDVGMGNVHPHGDSAIYDALAR.M<br>K.DILSAFIIFR.E<br>R.STHVIEGR.N<br>R.LFDVAEGEHVSAALLIEDGDEDADDGRDVEASDNPVSEAPTE.<br>R.FAGDDVREFQSR.N<br>R.EQFILTVCANGYK.L<br>R.TLAPAADGIDDEDLIEREMVTVTMDGYIK.R<br>R.LIGVALLDESDDVLLATR.Q<br>R.GRPMINLLAQGETISTVPLPEDESEWGK.L<br>R.DRAHLLGLVAVSNLDEVYR.I<br>R.AHLLGLVAVSNLDEVYR.I<br>R.AGMATKDEDVTELVFTSTHTPVLFFSTAGK.V<br>K.RTPLATFR.A<br>R.TIDALTPAQGR.I<br>R.AVAPGLTVPPIAAANLLR.T<br>R.AVSDADQVTAETGR.<br>R.LGELADYPAFTAGR.L<br>R.EAVGAALPEAAR.T<br>R.TDSGGGSLGIYAR.A<br>R.ITPDEGASLEISDWR.A<br>R.GFASIVDGPATAPK.G<br>R.TASVTATSAGSALQLGR.N<br>R.EIVLVAEPGAVLGEIALLDGGER.T<br>R.VLEPELIDISESEG.<br>R.TADQTIESDR.A<br>K.SWEESGIIALEQGR.V<br>R.TADQTIESDRAYASGPR.L<br>R.LAELQSPDSIFSGLSVEDWAEITR.R<br>K.GKELLVQSDPGDMMLLLETGAR.V<br>R.VELSQTELGNFAGMSR.E<br>K.ELLVQSDPGDMMLLLETGAR.V<br>K.LSPNSHVASYGTNEISER.H<br>K.GLMAASLAALLQAR.G<br>R.AFGILLDAPAPDLTAWYDIMDR.K<br>R.FIFITGGVSSLGK.G<br>K.EAVIPALDADSISVVPQYHGEGLDSEVLR.A<br>R.KQHPEGEVITIGVKG.Y<br>R.NTSGIANASSTFEGPTDEPVVGLITWMSAEGQLQR.R<br>R.K.EAVIPALDADSISVVPQYHGEGLDSEVLR.A<br>K.SKPFDPHPLFAGFIEAIVK.Q<br>R.RGDYLGATVQVPHVTDIAIK.D<br>K.SLNEALVHGGMAHR.V<br>R.IYQGIIAK.E<br>R.GANTDLGGTMR.L<br>R.DNAISVHVTLPYIAAAGELK.T<br>K.QHPEGEVITIGVKG.Y<br>R.YEVNGAYR.E<br>R.WLDAEMEREDLVANLEPHLIGLVPGGFGR.G<br>R.RGDYLGATVQVPHVTDIAIKDFAR.A<br>R.HRYEVNGAYR.E<br>K.GLMAASLAALLQAR.G                                                                                                                                                                                                                                                                                          |
| YP_616192 | Sala_1143 | twin-arginine translocation protein, Tata/E family    | 46.75%            | 3                       | R.APDLSATPTTAETENR.<br>K.QIDAQRAAPDLSATPTTAETENR.<br>K.GMSDDATPTAPK.Q<br>R.DIESVGEAGDR.A<br>R.DIESVGEAGDRAI.<br>K.GVGRDIESVGEAGDR.A<br>R.AAIEDALSFPEESAGR.L<br>R.YALISAIVVDK.A<br>R.DVIGLAEAGEGAAR.E<br>K.PDFRVDVIGLAEAGEGAARERIGR.L<br>R.LRPDLAPLHVER.I<br>R.ISTLAQQGYDGVFHR.V<br>R.FLDNQYVWGEVIEGMEHVDALPK.G<br>R.VIPGFMAQGGDPTGTGMGGSQLPDLQFNFSEPHVR.G<br>K.CEPPREKTIKK.A<br>R.ATLAEDLGAGDITSLATPADAR.F<br>R.AIAETGVYVSGR.L<br>R.QYVDAIAGTGATLDTR.K<br>R.DAITVAGLPIAER.F<br>R.VAQVPELVAGATHLLDNMGLDRLR.T<br>R.SALNTVQHLSGIATMTR.Q<br>R.TSVAIVDGR.V<br>R.QYVDAIAGTGATLDTRK.T<br>R.LTQSPAADIGLDFALA.<br>K.DNHVAVAGSVEEAVR.R<br>R.MSVIPTIAPFLPGLLR.L<br>R.EAEELADMAAASAPLVGELR.M<br>K.DALAFDAIAPVYR.D<br>R.IDKLPTEGLTIVATPLAASLAESIGATGK.D<br>R.QDNALGTLWNMVFQTK.L<br>R.FAAELGGR.A<br>R.FAQGITGCEGYESAAGLVAAR.F<br>R.ALSEPHNITVYR.E<br>R.SDQGSNAVGLLR.E<br>R.SDDAALETQLHPFVR.A<br>R.FTAYFGGDFPFRIPGR.K<br>R.ATGGYDGHDR.L<br>K.VLTAQQWTFERER.V<br>K.VLTAQQWTFER.E<br>R.EWPGIDAPYR.L<br>R.QSVLTSIPFQVKG.S<br>R.GGQGITNIDNIAR.N<br>R.DATAEVVNLQWR.H<br>K.FEGDDEDRLIGVALLDESDDVLLATR.Q<br>R.LYAAQEGGFIPGRPK.K<br>R.EELVAVRDEFATR.R<br>K.TSYLDYAMSVIVSR.A<br>K.DNENEPTLPAER.M<br>R.IEGVADIRDESNR.E<br>R.GRPMINLLAQGETISTVPLPEDESEWGK.L<br>K.TAMVLNLDKDTVDQPNYDASR.E<br>K.DEDVTELVFTSTHTPVLFFSTAGK.V<br>R.LAEGDEVISLSLHR.V<br>R.AAPWKDNEPTLPAER.M<br>R.VGTTGDEREAYLR.A<br>R.STHVIEGRNDR.Q<br>R.NGVPVAFPAQAHQLMLVDQAK.L<br>R.LVIAEGEMEAATYR.L<br>R.AGMATKDEDVTELVFTSTHTPVLFFSTAGK.V<br>R.NSMDAFTNVPNSGK.I<br>K.IVGDVGMGNVHPHGDSAIYDALAR.M<br>K.DILSAFIIFR.E<br>R.STHVIEGR.N<br>R.LFDVAEGEHVSAALLIEDGDEDADDGRDVEASDNPVSEAPTE.<br>R.FAGDDVREFQSR.N<br>R.EQFILTVCANGYK.L<br>R.TLAPAADGIDDEDLIEREMVTVTMDGYIK.R<br>R.LIGVALLDESDDVLLATR.Q<br>R.GRPMINLLAQGETISTVPLPEDESEWGK.L<br>R.DRAHLLGLVAVSNLDEVYR.I<br>R.AHLLGLVAVSNLDEVYR.I<br>R.AGMATKDEDVTELVFTSTHTPVLFFSTAGK.V<br>K.RTPLATFR.A<br>R.TIDALTPAQGR.I<br>R.AVAPGLTVPPIAAANLLR.T<br>R.AVSDADQVTAETGR.<br>R.LGELADYPAFTAGR.L<br>R.EAVGAALPEAAR.T<br>R.TDSGGGSLGIYAR.A<br>R.ITPDEGASLEISDWR.A<br>R.GFASIVDGPATAPK.G<br>R.TASVTATSAGSALQLGR.N<br>R.EIVLVAEPGAVLGEIALLDGGER.T<br>R.VLEPELIDISESEG.<br>R.TADQTIESDR.A<br>K.SWEESGIIALEQGR.V<br>R.TADQTIESDRAYASGPR.L<br>R.LAELQSPDSIFSGLSVEDWAEITR.R<br>K.GKELLVQSDPGDMMLLLETGAR.V<br>R.VELSQTELGNFAGMSR.E<br>K.ELLVQSDPGDMMLLLETGAR.V<br>K.LSPNSHVASYGTNEISER.H<br>K.GLMAASLAALLQAR.G<br>R.AFGILLDAPAPDLTAWYDIMDR.K<br>R.FIFITGGVSSLGK.G<br>K.EAVIPALDADSISVVPQYHGEGLDSEVLR.A<br>R.KQHPEGEVITIGVKG.Y<br>R.NTSGIANASSTFEGPTDEPVVGLITWMSAEGQLQR.R<br>R.K.EAVIPALDADSISVVPQYHGEGLDSEVLR.A<br>K.SKPFDPHPLFAGFIEAIVK.Q<br>R.RGDYLGATVQVPHVTDIAIK.D<br>K.SLNEALVHGGMAHR.V<br>R.IYQGIIAK.E<br>R.GANTDLGGTMR.L<br>R.DNAISVHVTLPYIAAAGELK.T<br>K.QHPEGEVITIGVKG.Y<br>R.YEVNGAYR.E<br>R.WLDAEMEREDLVANLEPHLIGLVPGGFGR.G<br>R.RGDYLGATVQVPHVTDIAIKDFAR.A<br>R.HRYEVNGAYR.E<br>K.GLMAASLAALLQAR.G                                                                                                                                                                                                                                                                                                                                                                                                                         |
| YP_616195 | Sala_1146 | Entericidin EcnAB                                     | 28.57%            | 3                       | R.APDLSATPTTAETENR.<br>K.QIDAQRAAPDLSATPTTAETENR.<br>K.GMSDDATPTAPK.Q<br>R.DIESVGEAGDR.A<br>R.DIESVGEAGDRAI.<br>K.GVGRDIESVGEAGDR.A<br>R.AAIEDALSFPEESAGR.L<br>R.YALISAIVVDK.A<br>R.DVIGLAEAGEGAAR.E<br>K.PDFRVDVIGLAEAGEGAARERIGR.L<br>R.LRPDLAPLHVER.I<br>R.ISTLAQQGYDGVFHR.V<br>R.FLDNQYVWGEVIEGMEHVDALPK.G<br>R.VIPGFMAQGGDPTGTGMGGSQLPDLQFNFSEPHVR.G<br>K.CEPPREKTIKK.A<br>R.ATLAEDLGAGDITSLATPADAR.F<br>R.AIAETGVYVSGR.L<br>R.QYVDAIAGTGATLDTR.K<br>R.DAITVAGLPIAER.F<br>R.VAQVPELVAGATHLLDNMGLDRLR.T<br>R.SALNTVQHLSGIATMTR.Q<br>R.TSVAIVDGR.V<br>R.QYVDAIAGTGATLDTRK.T<br>R.LTQSPAADIGLDFALA.<br>K.DNHVAVAGSVEEAVR.R<br>R.MSVIPTIAPFLPGLLR.L<br>R.EAEELADMAAASAPLVGELR.M<br>K.DALAFDAIAPVYR.D<br>R.IDKLPTEGLTIVATPLAASLAESIGATGK.D<br>R.QDNALGTLWNMVFQTK.L<br>R.FAAELGGR.A<br>R.FAQGITGCEGYESAAGLVAAR.F<br>R.ALSEPHNITVYR.E<br>R.SDQGSNAVGLLR.E<br>R.SDDAALETQLHPFVR.A<br>R.FTAYFGGDFPFRIPGR.K<br>R.ATGGYDGHDR.L<br>K.VLTAQQWTFERER.V<br>K.VLTAQQWTFER.E<br>R.EWPGIDAPYR.L<br>R.QSVLTSIPFQVKG.S<br>R.GGQGITNIDNIAR.N<br>R.DATAEVVNLQWR.H<br>K.FEGDDEDRLIGVALLDESDDVLLATR.Q<br>R.LYAAQEGGFIPGRPK.K<br>R.EELVAVRDEFATR.R<br>K.TSYLDYAMSVIVSR.A<br>K.DNENEPTLPAER.M<br>R.IEGVADIRDESNR.E<br>R.GRPMINLLAQGETISTVPLPEDESEWGK.L<br>K.TAMVLNLDKDTVDQPNYDASR.E<br>K.DEDVTELVFTSTHTPVLFFSTAGK.V<br>R.LAEGDEVISLSLHR.V<br>R.AAPWKDNEPTLPAER.M<br>R.VGTTGDEREAYLR.A<br>R.STHVIEGRNDR.Q<br>R.NGVPVAFPAQAHQLMLVDQAK.L<br>R.LVIAEGEMEAATYR.L<br>R.AGMATKDEDVTELVFTSTHTPVLFFSTAGK.V<br>R.NSMDAFTNVPNSGK.I<br>K.IVGDVGMGNVHPHGDSAIYDALAR.M<br>K.DILSAFIIFR.E<br>R.STHVIEGR.N<br>R.LFDVAEGEHVSAALLIEDGDEDADDGRDVEASDNPVSEAPTE.<br>R.FAGDDVREFQSR.N<br>R.EQFILTVCANGYK.L<br>R.TLAPAADGIDDEDLIEREMVTVTMDGYIK.R<br>R.LIGVALLDESDDVLLATR.Q<br>R.GRPMINLLAQGETISTVPLPEDESEWGK.L<br>R.DRAHLLGLVAVSNLDEVYR.I<br>R.AHLLGLVAVSNLDEVYR.I<br>R.AGMATKDEDVTELVFTSTHTPVLFFSTAGK.V<br>K.RTPLATFR.A<br>R.TIDALTPAQGR.I<br>R.AVAPGLTVPPIAAANLLR.T<br>R.AVSDADQVTAETGR.<br>R.LGELADYPAFTAGR.L<br>R.EAVGAALPEAAR.T<br>R.TDSGGGSLGIYAR.A<br>R.ITPDEGASLEISDWR.A<br>R.GFASIVDGPATAPK.G<br>R.TASVTATSAGSALQLGR.N<br>R.EIVLVAEPGAVLGEIALLDGGER.T<br>R.VLEPELIDISESEG.<br>R.TADQTIESDR.A<br>K.SWEESGIIALEQGR.V<br>R.TADQTIESDRAYASGPR.L<br>R.LAELQSPDSIFSGLSVEDWAEITR.R<br>K.GKELLVQSDPGDMMLLLETGAR.V<br>R.VELSQTELGNFAGMSR.E<br>K.ELLVQSDPGDMMLLLETGAR.V<br>K.LSPNSHVASYGTNEISER.H<br>K.GLMAASLAALLQAR.G<br>R.AFGILLDAPAPDLTAWYDIMDR.K<br>R.FIFITGGVSSLGK.G<br>K.EAVIPALDADSISVVPQYHGEGLDSEVLR.A<br>R.KQHPEGEVITIGVKG.Y<br>R.NTSGIANASSTFEGPTDEPVVGLITWMSAEGQLQR.R<br>R.K.EAVIPALDADSISVVPQYHGEGLDSEVLR.A<br>K.SKPFDPHPLFAGFIEAIVK.Q<br>R.RGDYLGATVQVPHVTDIAIK.D<br>K.SLNEALVHGGMAHR.V<br>R.IYQGIIAK.E<br>R.GANTDLGGTMR.L<br>R.DNAISVHVTLPYIAAAGELK.T<br>K.QHPEGEVITIGVKG.Y<br>R.YEVNGAYR.E<br>R.WLDAEMEREDLVANLEPHLIGLVPGGFGR.G<br>R.RGDYLGATVQVPHVTDIAIKDFAR.A<br>R.HRYEVNGAYR.E<br>K.GLMAASLAALLQAR.G                                                                                                                                                                                                                                                                                                                                                                                                                         |
| YP_616196 | Sala_1147 | magnesium transporter                                 | 10.86%            | 4                       | R.AAIEDALSFPEESAGR.L<br>R.YALISAIVVDK.A<br>R.DVIGLAEAGEGAAR.E<br>K.PDFRVDVIGLAEAGEGAARERIGR.L<br>R.LRPDLAPLHVER.I<br>R.ISTLAQQGYDGVFHR.V<br>R.FLDNQYVWGEVIEGMEHVDALPK.G<br>R.VIPGFMAQGGDPTGTGMGGSQLPDLQFNFSEPHVR.G<br>K.CEPPREKTIKK.A<br>R.ATLAEDLGAGDITSLATPADAR.F<br>R.AIAETGVYVSGR.L<br>R.QYVDAIAGTGATLDTR.K<br>R.DAITVAGLPIAER.F<br>R.VAQVPELVAGATHLLDNMGLDRLR.T<br>R.SALNTVQHLSGIATMTR.Q<br>R.TSVAIVDGR.V<br>R.QYVDAIAGTGATLDTRK.T<br>R.LTQSPAADIGLDFALA.<br>K.DNHVAVAGSVEEAVR.R<br>R.MSVIPTIAPFLPGLLR.L<br>R.EAEELADMAAASAPLVGELR.M<br>K.DALAFDAIAPVYR.D<br>R.IDKLPTEGLTIVATPLAASLAESIGATGK.D<br>R.QDNALGTLWNMVFQTK.L<br>R.FAAELGGR.A<br>R.FAQGITGCEGYESAAGLVAAR.F<br>R.ALSEPHNITVYR.E<br>R.SDQGSNAVGLLR.E<br>R.SDDAALETQLHPFVR.A<br>R.FTAYFGGDFPFRIPGR.K<br>R.ATGGYDGHDR.L<br>K.VLTAQQWTFERER.V<br>K.VLTAQQWTFER.E<br>R.EWPGIDAPYR.L<br>R.QSVLTSIPFQVKG.S<br>R.GGQGITNIDNIAR.N<br>R.DATAEVVNLQWR.H<br>K.FEGDDEDRLIGVALLDESDDVLLATR.Q<br>R.LYAAQEGGFIPGRPK.K<br>R.EELVAVRDEFATR.R<br>K.TSYLDYAMSVIVSR.A<br>K.DNENEPTLPAER.M<br>R.IEGVADIRDESNR.E<br>R.GRPMINLLAQGETISTVPLPEDESEWGK.L<br>K.TAMVLNLDKDTVDQPNYDASR.E<br>K.DEDVTELVFTSTHTPVLFFSTAGK.V<br>R.LAEGDEVISLSLHR.V<br>R.AAPWKDNEPTLPAER.M<br>R.VGTTGDEREAYLR.A<br>R.STHVIEGRNDR.Q<br>R.NGVPVAFPAQAHQLMLVDQAK.L<br>R.LVIAEGEMEAATYR.L<br>R.AGMATKDEDVTELVFTSTHTPVLFFSTAGK.V<br>R.NSMDAFTNVPNSGK.I<br>K.IVGDVGMGNVHPHGDSAIYDALAR.M<br>K.DILSAFIIFR.E<br>R.STHVIEGR.N<br>R.LFDVAEGEHVSAALLIEDGDEDADDGRDVEASDNPVSEAPTE.<br>R.FAGDDVREFQSR.N<br>R.EQFILTVCANGYK.L<br>R.TLAPAADGIDDEDLIEREMVTVTMDGYIK.R<br>R.LIGVALLDESDDVLLATR.Q<br>R.GRPMINLLAQGETISTVPLPEDESEWGK.L<br>R.DRAHLLGLVAVSNLDEVYR.I<br>R.AHLLGLVAVSNLDEVYR.I<br>R.AGMATKDEDVTELVFTSTHTPVLFFSTAGK.V<br>K.RTPLATFR.A<br>R.TIDALTPAQGR.I<br>R.AVAPGLTVPPIAAANLLR.T<br>R.AVSDADQVTAETGR.<br>R.LGELADYPAFTAGR.L<br>R.EAVGAALPEAAR.T<br>R.TDSGGGSLGIYAR.A<br>R.ITPDEGASLEISDWR.A<br>R.GFASIVDGPATAPK.G<br>R.TASVTATSAGSALQLGR.N<br>R.EIVLVAEPGAVLGEIALLDGGER.T<br>R.VLEPELIDISESEG.<br>R.TADQTIESDR.A<br>K.SWEESGIIALEQGR.V<br>R.TADQTIESDRAYASGPR.L<br>R.LAELQSPDSIFSGLSVEDWAEITR.R<br>K.GKELLVQSDPGDMMLLLETGAR.V<br>R.VELSQTELGNFAGMSR.E<br>K.ELLVQSDPGDMMLLLETGAR.V<br>K.LSPNSHVASYGTNEISER.H<br>K.GLMAASLAALLQAR.G<br>R.AFGILLDAPAPDLTAWYDIMDR.K<br>R.FIFITGGVSSLGK.G<br>K.EAVIPALDADSISVVPQYHGEGLDSEVLR.A<br>R.KQHPEGEVITIGVKG.Y<br>R.NTSGIANASSTFEGPTDEPVVGLITWMSAEGQLQR.R<br>R.K.EAVIPALDADSISVVPQYHGEGLDSEVLR.A<br>K.SKPFDPHPLFAGFIEAIVK.Q<br>R.RGDYLGATVQVPHVTDIAIK.D<br>K.SLNEALVHGGMAHR.V<br>R.IYQGIIAK.E<br>R.GANTDLGGTMR.L<br>R.DNAISVHVTLPYIAAAGELK.T<br>K.QHPEGEVITIGVKG.Y<br>R.YEVNGAYR.E<br>R.WLDAEMEREDLVANLEPHLIGLVPGGFGR.G<br>R.RGDYLGATVQVPHVTDIAIKDFAR.A<br>R.HRYEVNGAYR.E<br>K.GLMAASLAALLQAR.G                                                                                                                                                                                                                                                                                                                                                                                                                                                                                                                                                                |
| YP_616197 | Sala_1148 | peptidyl-prolyl cis-trans isomerase, cyclophilin type | 68.24%            | 5                       | R.LRPDLAPLHVER.I<br>R.ISTLAQQGYDGVFHR.V<br>R.FLDNQYVWGEVIEGMEHVDALPK.G<br>R.VIPGFMAQGGDPTGTGMGGSQLPDLQFNFSEPHVR.G<br>K.CEPPREKTIKK.A<br>R.ATLAEDLGAGDITSLATPADAR.F<br>R.AIAETGVYVSGR.L<br>R.QYVDAIAGTGATLDTR.K<br>R.DAITVAGLPIAER.F<br>R.VAQVPELVAGATHLLDNMGLDRLR.T<br>R.SALNTVQHLSGIATMTR.Q<br>R.TSVAIVDGR.V<br>R.QYVDAIAGTGATLDTRK.T<br>R.LTQSPAADIGLDFALA.<br>K.DNHVAVAGSVEEAVR.R<br>R.MSVIPTIAPFLPGLLR.L<br>R.EAEELADMAAASAPLVGELR.M<br>K.DALAFDAIAPVYR.D<br>R.IDKLPTEGLTIVATPLAASLAESIGATGK.D<br>R.QDNALGTLWNMVFQTK.L<br>R.FAAELGGR.A<br>R.FAQGITGCEGYESAAGLVAAR.F<br>R.ALSEPHNITVYR.E<br>R.SDQGSNAVGLLR.E<br>R.SDDAALETQLHPFVR.A<br>R.FTAYFGGDFPFRIPGR.K<br>R.ATGGYDGHDR.L<br>K.VLTAQQWTFERER.V<br>K.VLTAQQWTFER.E<br>R.EWPGIDAPYR.L<br>R.QSVLTSIPFQVKG.S<br>R.GGQGITNIDNIAR.N<br>R.DATAEVVNLQWR.H<br>K.FEGDDEDRLIGVALLDESDDVLLATR.Q<br>R.LYAAQEGGFIPGRPK.K<br>R.EELVAVRDEFATR.R<br>K.TSYLDYAMSVIVSR.A<br>K.DNENEPTLPAER.M<br>R.IEGVADIRDESNR.E<br>R.GRPMINLLAQGETISTVPLPEDESEWGK.L<br>K.TAMVLNLDKDTVDQPNYDASR.E<br>K.DEDVTELVFTSTHTPVLFFSTAGK.V<br>R.LAEGDEVISLSLHR.V<br>R.AAPWKDNEPTLPAER.M<br>R.VGTTGDEREAYLR.A<br>R.STHVIEGRNDR.Q<br>R.NGVPVAFPAQAHQLMLVDQAK.L<br>R.LVIAEGEMEAATYR.L<br>R.AGMATKDEDVTELVFTSTHTPVLFFSTAGK.V<br>R.NSMDAFTNVPNSGK.I<br>K.IVGDVGMGNVHPHGDSAIYDALAR.M<br>K.DILSAFIIFR.E<br>R.STHVIEGR.N<br>R.LFDVAEGEHVSAALLIEDGDEDADDGRDVEASDNPVSEAPTE.<br>R.FAGDDVREFQSR.N<br>R.EQFILTVCANGYK.L<br>R.TLAPAADGIDDEDLIEREMVTVTMDGYIK.R<br>R.LIGVALLDESDDVLLATR.Q<br>R.GRPMINLLAQGETISTVPLPEDESEWGK.L<br>R.DRAHLLGLVAVSNLDEVYR.I<br>R.AHLLGLVAVSNLDEVYR.I<br>R.AGMATKDEDVTELVFTSTHTPVLFFSTAGK.V<br>K.RTPLATFR.A<br>R.TIDALTPAQGR.I<br>R.AVAPGLTVPPIAAANLLR.T<br>R.AVSDADQVTAETGR.<br>R.LGELADYPAFTAGR.L<br>R.EAVGAALPEAAR.T<br>R.TDSGGGSLGIYAR.A<br>R.ITPDEGASLEISDWR.A<br>R.GFASIVDGPATAPK.G<br>R.TASVTATSAGSALQLGR.N<br>R.EIVLVAEPGAVLGEIALLDGGER.T<br>R.VLEPELIDISESEG.<br>R.TADQTIESDR.A<br>K.SWEESGIIALEQGR.V<br>R.TADQTIESDRAYASGPR.L<br>R.LAELQSPDSIFSGLSVEDWAEITR.R<br>K.GKELLVQSDPGDMMLLLETGAR.V<br>R.VELSQTELGNFAGMSR.E<br>K.ELLVQSDPGDMMLLLETGAR.V<br>K.LSPNSHVASYGTNEISER.H<br>K.GLMAASLAALLQAR.G<br>R.AFGILLDAPAPDLTAWYDIMDR.K<br>R.FIFITGGVSSLGK.G<br>K.EAVIPALDADSISVVPQYHGEGLDSEVLR.A<br>R.KQHPEGEVITIGVKG.Y<br>R.NTSGIANASSTFEGPTDEPVVGLITWMSAEGQLQR.R<br>R.K.EAVIPALDADSISVVPQYHGEGLDSEVLR.A<br>K.SKPFDPHPLFAGFIEAIVK.Q<br>R.RGDYLGATVQVPHVTDIAIK.D<br>K.SLNEALVHGGMAHR.V<br>R.IYQGIIAK.E<br>R.GANTDLGGTMR.L<br>R.DNAISVHVTLPYIAAAGELK.T<br>K.QHPEGEVITIGVKG.Y<br>R.YEVNGAYR.E<br>R.WLDAEMEREDLVANLEPHLIGLVPGGFGR.G<br>R.RGDYLGATVQVPHVTDIAIKDFAR.A<br>R.HRYEVNGAYR.E<br>K.GLMAASLAALLQAR.G                                                                                                                                                                                                                                                                                                                                                                                                                                                                                                                                                                                                                                                                 |
| YP_616199 | Sala_1150 | nicotinate-nucleotide pyrophosphorylase               | 50.16%            | 10                      | R.AAIEDALSFPEESAGR.L<br>R.YALISAIVVDK.A<br>R.DVIGLAEAGEGAAR.E<br>K.PDFRVDVIGLAEAGEGAARERIGR.L<br>R.LRPDLAPLHVER.I<br>R.ISTLAQQGYDGVFHR.V<br>R.FLDNQYVWGEVIEGMEHVDALPK.G<br>R.VIPGFMAQGGDPTGTGMGGSQLPDLQFNFSEPHVR.G<br>K.CEPPREKTIKK.A<br>R.ATLAEDLGAGDITSLATPADAR.F<br>R.AIAETGVYVSGR.L<br>R.QYVDAIAGTGATLDTR.K<br>R.DAITVAGLPIAER.F<br>R.VAQVPELVAGATHLLDNMGLDRLR.T<br>R.SALNTVQHLSGIATMTR.Q<br>R.TSVAIVDGR.V<br>R.QYVDAIAGTGATLDTRK.T<br>R.LTQSPAADIGLDFALA.<br>K.DNHVAVAGSVEEAVR.R<br>R.MSVIPTIAPFLPGLLR.L<br>R.EAEELADMAAASAPLVGELR.M<br>K.DALAFDAIAPVYR.D<br>R.IDKLPTEGLTIVATPLAASLAESIGATGK.D<br>R.QDNALGTLWNMVFQTK.L<br>R.FAAELGGR.A<br>R.FAQGITGCEGYESAAGLVAAR.F<br>R.ALSEPHNITVYR.E<br>R.SDQGSNAVGLLR.E<br>R.SDDAALETQLHPFVR.A<br>R.FTAYFGGDFPFRIPGR.K<br>R.ATGGYDGHDR.L<br>K.VLTAQQWTFERER.V<br>K.VLTAQQWTFER.E<br>R.EWPGIDAPYR.L<br>R.QSVLTSIPFQVKG.S<br>R.GGQGITNIDNIAR.N<br>R.DATAEVVNLQWR.H<br>K.FEGDDEDRLIGVALLDESDDVLLATR.Q<br>R.LYAAQEGGFIPGRPK.K<br>R.EELVAVRDEFATR.R<br>K.TSYLDYAMSVIVSR.A<br>K.DNENEPTLPAER.M<br>R.IEGVADIRDESNR.E<br>R.GRPMINLLAQGETISTVPLPEDESEWGK.L<br>K.TAMVLNLDKDTVDQPNYDASR.E<br>K.DEDVTELVFTSTHTPVLFFSTAGK.V<br>R.LAEGDEVISLSLHR.V<br>R.AAPWKDNEPTLPAER.M<br>R.VGTTGDEREAYLR.A<br>R.STHVIEGRNDR.Q<br>R.NGVPVAFPAQAHQLMLVDQAK.L<br>R.LVIAEGEMEAATYR.L<br>R.AGMATKDEDVTELVFTSTHTPVLFFSTAGK.V<br>R.NSMDAFTNVPNSGK.I<br>K.IVGDVGMGNVHPHGDSAIYDALAR.M<br>K.DILSAFIIFR.E<br>R.STHVIEGR.N<br>R.LFDVAEGEHVSAALLIEDGDEDADDGRDVEASDNPVSEAPTE.<br>R.FAGDDVREFQSR.N<br>R.EQFILTVCANGYK.L<br>R.TLAPAADGIDDEDLIEREMVTVTMDGYIK.R<br>R.LIGVALLDESDDVLLATR.Q<br>R.GRPMINLLAQGETISTVPLPEDESEWGK.L<br>R.DRAHLLGLVAVSNLDEVYR.I<br>R.AHLLGLVAVSNLDEVYR.I<br>R.AGMATKDEDVTELVFTSTHTPVLFFSTAGK.V<br>K.RTPLATFR.A<br>R.TIDALTPAQGR.I<br>R.AVAPGLTVPPIAAANLLR.T<br>R.AVSDADQVTAETGR.<br>R.LGELADYPAFTAGR.L<br>R.EAVGAALPEAAR.T<br>R.TDSGGGSLGIYAR.A<br>R.ITPDEGASLEISDWR.A<br>R.GFASIVDGPATAPK.G<br>R.TASVTATSAGSALQLGR.N<br>R.EIVLVAEPGAVLGEIALLDGGER.T<br>R.VLEPELIDISESEG.<br>R.TADQTIESDR.A<br>K.SWEESGIIALEQGR.V<br>R.TADQTIESDRAYASGPR.L<br>R.LAELQSPDSIFSGLSVEDWAEITR.R<br>K.GKELLVQSDPGDMMLLLETGAR.V<br>R.VELSQTELGNFAGMSR.E<br>K.ELLVQSDPGDMMLLLETGAR.V<br>K.LSPNSHVASYGTNEISER.H<br>K.GLMAASLAALLQAR.G<br>R.AFGILLDAPAPDLTAWYDIMDR.K<br>R.FIFITGGVSSLGK.G<br>K.EAVIPALDADSISVVPQYHGEGLDSEVLR.A<br>R.KQHPEGEVITIGVKG.Y<br>R.NTSGIANASSTFEGPTDEPVVGLITWMSAEGQLQR.R<br>R.K.EAVIPALDADSISVVPQYHGEGLDSEVLR.A<br>K.SKPFDPHPLFAGFIEAIVK.Q<br>R.RGDYLGATVQVPHVTDIAIK.D<br>K.SLNEALVHGGMAHR.V<br>R.IYQGIIAK.E<br>R.GANTDLGGTMR.L<br>R.DNAISVHVTLPYIAAAGELK.T<br>K.QHPEGEVITIGVKG.Y<br>R.YEVNGAYR.E<br>R.WLDAEMEREDLVANLEPHLIGLVPGGFGR.G<br>R.RGDYLGATVQVPHVTDIAIKDFAR.A<br>R.HRYEVNGAYR.E<br>K.GLMAASLAALLQAR.G                                                                                                                                                                                                                                                                                                                                                                                                                                                                                                                                                                |
| YP_616206 | Sala_1157 | transcriptional regulator, LysR family                | 11.96%            | 2                       | R.MSVIPTIAPFLPGLLR.L<br>R.EAEELADMAAASAPLVGELR.M<br>K.DALAFDAIAPVYR.D<br>R.IDKLPTEGLTIVATPLAASLAESIGATGK.D<br>R.QDNALGTLWNMVFQTK.L<br>R.FAAELGGR.A<br>R.FAQGITGCEGYESAAGLVAAR.F<br>R.ALSEPHNITVYR.E<br>R.SDQGSNAVGLLR.E<br>R.SDDAALETQLHPFVR.A<br>R.FTAYFGGDFPFRIPGR.K<br>R.ATGGYDGHDR.L<br>K.VLTAQQWTFERER.V<br>K.VLTAQQWTFER.E<br>R.EWPGIDAPYR.L<br>R.QSVLTSIPFQVKG.S<br>R.GGQGITNIDNIAR.N<br>R.DATAEVVNLQWR.H<br>K.FEGDDEDRLIGVALLDESDDVLLATR.Q<br>R.LYAAQEGGFIPGRPK.K<br>R.EELVAVRDEFATR.R<br>K.TSYLDYAMSVIVSR.A<br>K.DNENEPTLPAER.M<br>R.IEGVADIRDESNR.E<br>R.GRPMINLLAQGETISTVPLPEDESEWGK.L<br>K.TAMVLNLDKDTVDQPNYDASR.E<br>K.DEDVTELVFTSTHTPVLFFSTAGK.V<br>R.LAEGDEVISLSLHR.V<br>R.AAPWKDNEPTLPAER.M<br>R.VGTTGDEREAYLR.A<br>R.STHVIEGRNDR.Q<br>R.NGVPVAFPAQAHQLMLVDQAK.L<br>R.LVIAEGEMEAATYR.L<br>R.AGMATKDEDVTELVFTSTHTPVLFFSTAGK.V<br>R.NSMDAFTNVPNSGK.I<br>K.IVGDVGMGNVHPHGDSAIYDALAR.M<br>K.DILSAFIIFR.E<br>R.STHVIEGR.N<br>R.LFDVAEGEHVSAALLIEDGDEDADDGRDVEASDNPVSEAPTE.<br>R.FAGDDVREFQSR.N<br>R.EQFILTVCANGYK.L<br>R.TLAPAADGIDDEDLIEREMVTVTMDGYIK.R<br>R.LIGVALLDESDDVLLATR.Q<br>R.GRPMINLLAQGETISTVPLPEDESEWGK.L<br>R.DRAHLLGLVAVSNLDEVYR.I<br>R.AHLLGLVAVSNLDEVYR.I                                                                                                                                                                                                                                                                                                                                                                                                                                                                                                                                                                                                                                                                                                                                                                                                                                                                                                                                                                                                                                                                                                                                                                                                                                                                                                                                                                                                                                                                                                                                                                                                                                                                                                                                                                                                                                                                                                                                                                                                                                                                                                             |

| Accession | Locus tag | Description                                                        | Sequence coverage | No. peptides identified | List of peptides identified                                                                                                                                                                                                                                                                                                                                                                                                                                                                                                                                                                                                                                                                                                                                                                                                                                                                                                                                                                                                                                                                                                                                                                                                                                                                                                                                                                                                                                                                                                                                                                                                                                                                                                                                                                                                                                                                                                                                                                                                                                                                                                                                                                                                                                                                                                                                                                                                                                                                                                                                                                                                                                                                                                                                                                                                                                                                                                                                                                                                                                                                                                                                                                                                                                                                                                                                                                                                    |
|-----------|-----------|--------------------------------------------------------------------|-------------------|-------------------------|--------------------------------------------------------------------------------------------------------------------------------------------------------------------------------------------------------------------------------------------------------------------------------------------------------------------------------------------------------------------------------------------------------------------------------------------------------------------------------------------------------------------------------------------------------------------------------------------------------------------------------------------------------------------------------------------------------------------------------------------------------------------------------------------------------------------------------------------------------------------------------------------------------------------------------------------------------------------------------------------------------------------------------------------------------------------------------------------------------------------------------------------------------------------------------------------------------------------------------------------------------------------------------------------------------------------------------------------------------------------------------------------------------------------------------------------------------------------------------------------------------------------------------------------------------------------------------------------------------------------------------------------------------------------------------------------------------------------------------------------------------------------------------------------------------------------------------------------------------------------------------------------------------------------------------------------------------------------------------------------------------------------------------------------------------------------------------------------------------------------------------------------------------------------------------------------------------------------------------------------------------------------------------------------------------------------------------------------------------------------------------------------------------------------------------------------------------------------------------------------------------------------------------------------------------------------------------------------------------------------------------------------------------------------------------------------------------------------------------------------------------------------------------------------------------------------------------------------------------------------------------------------------------------------------------------------------------------------------------------------------------------------------------------------------------------------------------------------------------------------------------------------------------------------------------------------------------------------------------------------------------------------------------------------------------------------------------------------------------------------------------------------------------------------------------|
|           |           |                                                                    |                   |                         | R.KFDYPLNVDPTGMSPYQHGEVYVDDGAETDLDLGHYR.F<br>R.GDYLGTAVQVPHVTDAIKDFAR.A<br>R.ELASLGVQPDILLCR.C<br>R.DEDLVANLEPHGILVPGGFER.G<br>K.YVSLPDAYK.S<br>K.TKPTQHSVR.E<br>K.RGANTDLGGTMR.L<br>K.SEGGGLVGGSPAGLLSAR.G<br>R.GAADFMTR.A<br>K.FYPIIEAAGL<br>R.ILYGSSVNGDNAELLDTGDVDGALVGGASLTAAK.F<br>R.FGDAQAIR.I<br>R.ESGGAIDHVLQAESVPDLDPQR.F<br>R.FAIAYEPIWAIGTGLVPTVADVAAMHGAI.R.D<br>R.FAIAYEPIWAIGTGLVPTVADVAAMHGAI.R.D<br>R.EGGESDADYR.A<br>R.AIFAAADTHPEVDVVALCPFFTLIGAMAAAAPGK.A<br>K.MNGLKEALGEAR.A<br>R.IAPALAEPPYALLLEQR.R<br>K.FDQTVFENFLR.Q<br>R.FAQVILPDQAAANR.L<br>K.ANEAIVDYNAIQDAVNSGASIEEATDR.K<br>R.VPELALLFSMAEGSVK.T<br>R.PLAPAFGNELLEQLAAEAR.R<br>K.SLNEAFAAGNIGNVQAIQGR.R<br>K.RGEVVGPLQTLGWTVVR.V<br>R.VYKDNAAQYATETR.R<br>R.VAALARPLAPAFGNELLEQLAAEAR.R<br>R.IADLPFAFVSGK.F<br>R.SLADASAIR.A<br>R.RAELGANGER.V<br>R.KLQIVETPAILNNGR.A<br>R.GQATFIPASAFAPK.G<br>R.QQLLEQLAAPPQMPR.I<br>R.GWVWIALDEV.R<br>R.APGQPGFTLAADLAPLVAQAFQVGGEGEQIATIVENK.F<br>K.ANEAIVDYNAIQDAVNSGASIEEATDR.L<br>R.RGQATFIPASAFAPK.G<br>R.VIQYAMFDR.A<br>R.GEVVGLQTLGWTVVR.V<br>R.ASVFPVAVTDAEIR.V<br>K.SIIAAAPPPAQIR.Q<br>R.SGASLASAAEAAGLSASTTGDGQSAVAATSAVAAR.A<br>K.VGGEEIGVGLR.D<br>K.DNAAQYATETR.R<br>R.RVGVITNK.G<br>R.QNGISEAQLR.R<br>R.GELSEWR.F<br>R.AELGANGERVPELALLFSMAEGSVK.T<br>K.LQIVETPAILNNGR.A<br>R.LSSASPHADGASTAALTQSITATPATSPER.F<br>R.YSLIGLDPDMFEVR.G<br>R.LADELFLIAPVWDR.G<br>R.IAPGKDAIDALFAGFPAGTVSGAPK.V<br>R.LIADIETPVSAALK.L<br>K.LIEPERGDWVLESVESGETR.G<br>R.FSTFDLPPFDLYR.A<br>R.HDRDAFVPEAGALQALR.D<br>R.APGAGLGLPDMIFVRPTTLVDFDR.L<br>R.AAALALAGGHGAVVWQR.L<br>K.AGALFAAR.E<br>R.DAFVPEAGALQALR.D<br>R.AEHLMLDLGR.N<br>K.DYIAAGDIFQVLSQR.F<br>R.TSAEAEENR.E<br>R.FAAMVAAK.D<br>K.ATPGVTSATPIEQPLTTFGGR.V<br>K.LAAQAVSDWR.S<br>R.GVEFLTQQLWDPISIR.F<br>R.DHGSAAVATHNER.L<br>R.ALANRPLLVADPEPTGNLDEATADR.V<br>R.RGEIVALLSPSGSK.S<br>R.VFDQFVALVR.D<br>R.GAGQAEAEADRAADLLAR.L<br>R.GAGQAEAEADR.A<br>K.STMLQAVGLLEGGFGGTR.I<br>R.VDFDGGPVDGQMLTGR.W<br>R.QHGEQSLDHGLTWTR.F<br>K.GAGGGSFSDYKER.R<br>K.IDVNGDDADPIFK.H<br>K.VLLIVNTASK.C<br>K.LPGGGTQSLADYR.G<br>R.LANGAPLIDVLAALYQDAR.G<br>R.ESSASVVAWALITDLDPLK.L<br>K.AQDIPVGPGR.G<br>R.STGGGLFGGDIAPTQLPAEPWTLAER.M<br>R.LGIDIAPPSINESEADFSVGR.T<br>R.LDLVAGISEAALSIVAPR.E<br>K.LVPHPTDPWTLER.A<br>R.WDAQVYELQR.G<br>R.VSNPEAWLQPAEMEDAFSDLPEAIR.N<br>R.TDGLICLTGGGEGALAR.L<br>R.GDFASLDDFASR.I<br>R.FLNLTLSDR.S<br>R.DTVAQITFGK.L<br>K.TANELFDLIDKFAQYGNK.S<br>R.SNVHAIETIQDPAFDLSSR.S<br>R.VLFFDAALFIVER.L<br>R.LFDEQLVYIINHAEDR.V<br>K.WWLPDEVVFDLPHATGK.I<br>R.IVDDEGKELPR.D<br>R.SNWGEVGTDR.R<br>K.SGEVVISSELENAVAGPVGQEAAGVYHPK.W<br>K.HVIGGSAAPR.A<br>K.ADADAADAGWFDTDVSVLHPDGMVQITDR.A<br>R.GQLTSVEHFVLDASAQGDYK.S<br>R.GPWIIQR.Y<br>K.KPGAESVEAAIIEYKDK.V<br>R.LRQTSVEHFVLDASAQGDYK.S<br>K.KPGAESVEAAIIEYK.D<br>K.AGVYVGHAWGMTETSPIGTMGR.R<br>R.IALLTSDSR.S<br>R.ALIKDETDLVSR.L<br>R.SGDRLEELLGAGHILAAAR.A<br>R.LDGDQJSGELFR.W<br>R.LHNWIDDPDQVVTGGTGLTR.D<br>R.TIGTSTIQR.A<br>R.GTYIFALPGSTGAVTDAWEGILASQLDSR.H<br>K.VIAAYNAGPAPVAR.W<br>R.YLQYLSREPATGGLLPK.V<br>R.PGTARDYR.W<br>R.AAVAGEPAVQSR.L<br>K.TPAANMDLQGR.Y<br>R.IAAGLTLSDAR.G<br>K.LLDAMLQAGLVR.R<br>K.LAFPGGALLGDSAGLVNVR.I<br>R.AISDGGYQSVPK.L<br>R.SLDELPEWR.T<br>R.AGDTLDAYQAYDDSVKWK.E<br>K.GSEVGAHILSGAVIDPR.S<br>K.YTFFAEGAR.G<br>K.ELWIDDPENHAPGR.V<br>K.HHPDNETLYR.A<br>K.DPSIPVEVWPLYDEPAQR.Y<br>R.LSSVFLSNTNHEEDQPVHLQK.D<br>R.ESMPYDVVIVGAGPAGLSAIR.L<br>K.ADYAPGLELHAK.Y |
| YP_616220 | Sala_1171 | preprotein translocase, SecE subunit                               | 17.53%            | 2                       |                                                                                                                                                                                                                                                                                                                                                                                                                                                                                                                                                                                                                                                                                                                                                                                                                                                                                                                                                                                                                                                                                                                                                                                                                                                                                                                                                                                                                                                                                                                                                                                                                                                                                                                                                                                                                                                                                                                                                                                                                                                                                                                                                                                                                                                                                                                                                                                                                                                                                                                                                                                                                                                                                                                                                                                                                                                                                                                                                                                                                                                                                                                                                                                                                                                                                                                                                                                                                                |
| YP_616221 | Sala_1172 | Triosephosphate isomerase                                          | 66.94%            | 9                       |                                                                                                                                                                                                                                                                                                                                                                                                                                                                                                                                                                                                                                                                                                                                                                                                                                                                                                                                                                                                                                                                                                                                                                                                                                                                                                                                                                                                                                                                                                                                                                                                                                                                                                                                                                                                                                                                                                                                                                                                                                                                                                                                                                                                                                                                                                                                                                                                                                                                                                                                                                                                                                                                                                                                                                                                                                                                                                                                                                                                                                                                                                                                                                                                                                                                                                                                                                                                                                |
| YP_616222 | Sala_1173 | hypothetical protein                                               | 62.56%            | 32                      |                                                                                                                                                                                                                                                                                                                                                                                                                                                                                                                                                                                                                                                                                                                                                                                                                                                                                                                                                                                                                                                                                                                                                                                                                                                                                                                                                                                                                                                                                                                                                                                                                                                                                                                                                                                                                                                                                                                                                                                                                                                                                                                                                                                                                                                                                                                                                                                                                                                                                                                                                                                                                                                                                                                                                                                                                                                                                                                                                                                                                                                                                                                                                                                                                                                                                                                                                                                                                                |
| YP_616223 | Sala_1174 | anthranilate synthase component I                                  | 49.11%            | 16                      |                                                                                                                                                                                                                                                                                                                                                                                                                                                                                                                                                                                                                                                                                                                                                                                                                                                                                                                                                                                                                                                                                                                                                                                                                                                                                                                                                                                                                                                                                                                                                                                                                                                                                                                                                                                                                                                                                                                                                                                                                                                                                                                                                                                                                                                                                                                                                                                                                                                                                                                                                                                                                                                                                                                                                                                                                                                                                                                                                                                                                                                                                                                                                                                                                                                                                                                                                                                                                                |
| YP_616224 | Sala_1175 | Lipoprotein releasing system, transmembrane protein, LolC/E family | 12.02%            | 3                       |                                                                                                                                                                                                                                                                                                                                                                                                                                                                                                                                                                                                                                                                                                                                                                                                                                                                                                                                                                                                                                                                                                                                                                                                                                                                                                                                                                                                                                                                                                                                                                                                                                                                                                                                                                                                                                                                                                                                                                                                                                                                                                                                                                                                                                                                                                                                                                                                                                                                                                                                                                                                                                                                                                                                                                                                                                                                                                                                                                                                                                                                                                                                                                                                                                                                                                                                                                                                                                |
| YP_616225 | Sala_1176 | ABC transporter related                                            | 44.44%            | 7                       |                                                                                                                                                                                                                                                                                                                                                                                                                                                                                                                                                                                                                                                                                                                                                                                                                                                                                                                                                                                                                                                                                                                                                                                                                                                                                                                                                                                                                                                                                                                                                                                                                                                                                                                                                                                                                                                                                                                                                                                                                                                                                                                                                                                                                                                                                                                                                                                                                                                                                                                                                                                                                                                                                                                                                                                                                                                                                                                                                                                                                                                                                                                                                                                                                                                                                                                                                                                                                                |
| YP_616226 | Sala_1177 | hypothetical protein                                               | 23.62%            | 3                       |                                                                                                                                                                                                                                                                                                                                                                                                                                                                                                                                                                                                                                                                                                                                                                                                                                                                                                                                                                                                                                                                                                                                                                                                                                                                                                                                                                                                                                                                                                                                                                                                                                                                                                                                                                                                                                                                                                                                                                                                                                                                                                                                                                                                                                                                                                                                                                                                                                                                                                                                                                                                                                                                                                                                                                                                                                                                                                                                                                                                                                                                                                                                                                                                                                                                                                                                                                                                                                |
| YP_616227 | Sala_1178 | Glutathione peroxidase                                             | 22.78%            | 3                       |                                                                                                                                                                                                                                                                                                                                                                                                                                                                                                                                                                                                                                                                                                                                                                                                                                                                                                                                                                                                                                                                                                                                                                                                                                                                                                                                                                                                                                                                                                                                                                                                                                                                                                                                                                                                                                                                                                                                                                                                                                                                                                                                                                                                                                                                                                                                                                                                                                                                                                                                                                                                                                                                                                                                                                                                                                                                                                                                                                                                                                                                                                                                                                                                                                                                                                                                                                                                                                |
| YP_616228 | Sala_1179 | DNA polymerase III, alpha subunit                                  | 20.65%            | 14                      |                                                                                                                                                                                                                                                                                                                                                                                                                                                                                                                                                                                                                                                                                                                                                                                                                                                                                                                                                                                                                                                                                                                                                                                                                                                                                                                                                                                                                                                                                                                                                                                                                                                                                                                                                                                                                                                                                                                                                                                                                                                                                                                                                                                                                                                                                                                                                                                                                                                                                                                                                                                                                                                                                                                                                                                                                                                                                                                                                                                                                                                                                                                                                                                                                                                                                                                                                                                                                                |
| YP_616229 | Sala_1180 | AMP-dependent synthetase and ligase                                | 44.38%            | 15                      |                                                                                                                                                                                                                                                                                                                                                                                                                                                                                                                                                                                                                                                                                                                                                                                                                                                                                                                                                                                                                                                                                                                                                                                                                                                                                                                                                                                                                                                                                                                                                                                                                                                                                                                                                                                                                                                                                                                                                                                                                                                                                                                                                                                                                                                                                                                                                                                                                                                                                                                                                                                                                                                                                                                                                                                                                                                                                                                                                                                                                                                                                                                                                                                                                                                                                                                                                                                                                                |
| YP_616231 | Sala_1182 | Molybdenum cofactor biosynthesis protein                           | 68.39%            | 7                       |                                                                                                                                                                                                                                                                                                                                                                                                                                                                                                                                                                                                                                                                                                                                                                                                                                                                                                                                                                                                                                                                                                                                                                                                                                                                                                                                                                                                                                                                                                                                                                                                                                                                                                                                                                                                                                                                                                                                                                                                                                                                                                                                                                                                                                                                                                                                                                                                                                                                                                                                                                                                                                                                                                                                                                                                                                                                                                                                                                                                                                                                                                                                                                                                                                                                                                                                                                                                                                |
| YP_616232 | Sala_1183 | Lytic transglycosylase, catalytic                                  | 11.05%            | 5                       |                                                                                                                                                                                                                                                                                                                                                                                                                                                                                                                                                                                                                                                                                                                                                                                                                                                                                                                                                                                                                                                                                                                                                                                                                                                                                                                                                                                                                                                                                                                                                                                                                                                                                                                                                                                                                                                                                                                                                                                                                                                                                                                                                                                                                                                                                                                                                                                                                                                                                                                                                                                                                                                                                                                                                                                                                                                                                                                                                                                                                                                                                                                                                                                                                                                                                                                                                                                                                                |
| YP_616233 | Sala_1184 | Uracyl-DNA glycosylase superfamily                                 | 9.16%             | 2                       |                                                                                                                                                                                                                                                                                                                                                                                                                                                                                                                                                                                                                                                                                                                                                                                                                                                                                                                                                                                                                                                                                                                                                                                                                                                                                                                                                                                                                                                                                                                                                                                                                                                                                                                                                                                                                                                                                                                                                                                                                                                                                                                                                                                                                                                                                                                                                                                                                                                                                                                                                                                                                                                                                                                                                                                                                                                                                                                                                                                                                                                                                                                                                                                                                                                                                                                                                                                                                                |
| YP_616234 | Sala_1185 | Electron-transferring-flavoprotein dehydrogenase                   | 52.63%            | 22                      |                                                                                                                                                                                                                                                                                                                                                                                                                                                                                                                                                                                                                                                                                                                                                                                                                                                                                                                                                                                                                                                                                                                                                                                                                                                                                                                                                                                                                                                                                                                                                                                                                                                                                                                                                                                                                                                                                                                                                                                                                                                                                                                                                                                                                                                                                                                                                                                                                                                                                                                                                                                                                                                                                                                                                                                                                                                                                                                                                                                                                                                                                                                                                                                                                                                                                                                                                                                                                                |

| Accession | Locus tag | Description                                              | Sequence coverage | No. peptides identified | List of peptides identified                                                                                                                                                                                                                                                                                                                                                                                                                                                                                                                                                                                                                                                                                                                                                                                                                                                                                                                                                                                                                                                                                                                                                                                                                                                                                                                                                                                                                                                                                                                                                                                                                                                                                                                                                                                                                                                                                                                                                                                                                                                                                                                                                                                                                                                                                                                                                                                                                                                                                                                                                                                                                                                                                                                                                                                                                                                                                                                                                                                                                                                                                                                                                                                                                                                                                                                                                                                            |
|-----------|-----------|----------------------------------------------------------|-------------------|-------------------------|------------------------------------------------------------------------------------------------------------------------------------------------------------------------------------------------------------------------------------------------------------------------------------------------------------------------------------------------------------------------------------------------------------------------------------------------------------------------------------------------------------------------------------------------------------------------------------------------------------------------------------------------------------------------------------------------------------------------------------------------------------------------------------------------------------------------------------------------------------------------------------------------------------------------------------------------------------------------------------------------------------------------------------------------------------------------------------------------------------------------------------------------------------------------------------------------------------------------------------------------------------------------------------------------------------------------------------------------------------------------------------------------------------------------------------------------------------------------------------------------------------------------------------------------------------------------------------------------------------------------------------------------------------------------------------------------------------------------------------------------------------------------------------------------------------------------------------------------------------------------------------------------------------------------------------------------------------------------------------------------------------------------------------------------------------------------------------------------------------------------------------------------------------------------------------------------------------------------------------------------------------------------------------------------------------------------------------------------------------------------------------------------------------------------------------------------------------------------------------------------------------------------------------------------------------------------------------------------------------------------------------------------------------------------------------------------------------------------------------------------------------------------------------------------------------------------------------------------------------------------------------------------------------------------------------------------------------------------------------------------------------------------------------------------------------------------------------------------------------------------------------------------------------------------------------------------------------------------------------------------------------------------------------------------------------------------------------------------------------------------------------------------------------------------|
| YP_616235 | Sala_1186 | Tetratricopeptide TPR_2                                  | 27.80%            | 9                       | K.WGDLGGTLAGITMWAETLK.I<br>R.YCPAGVYEVIGQEEGNPR.F<br>R.DGSHKADYAPGLELHAK.Y<br>R.AGDTLDAYQAADDSSWVK.K<br>K.SGMMAAEAAFAAVSAGR.A<br>K.GVATGDMGVAR.D<br>R.TMGCPLEVPVNDNQHWLTK.N<br>R.NPHISPFQEMQK.W<br>K.WGDLGGTLAGITMWAETLK.I<br>K.GVATGDMGVAR.D<br>R.LADEIGLSRSLQVALR.A<br>R.AEAAARNDAPR.M<br>R.RAGEAAR.L<br>R.LEAALGEEDR.A<br>R.IALAAGEREDPMLLLDPQPVTPR.A<br>R.ATLVEALAR.D<br>R.APQNASITDLSLWYFLIGR.T<br>R.AGSAQWILGLADGLAR.T<br>R.AELMLQADQWDAAPLIER.A<br>R.THFELPELGDATLAR.I<br>R.YGADRVPPLAVR.L<br>R.IAGVPVLLVNR.Q<br>R.QDLVGDAGQAFLAER.L<br>R.LVVDLNRREEAPGVLPASDGHAVPGNALDAAAR.E<br>R.AGGIMAILGELDR.A<br>R.TITLAVADSVLAER.R<br>R.RWDSLDR.I<br>R.RHYEEDDSVLR.N<br>R.INIPVVFVSGPMEAGK.V<br>R.HYEEGDDSVLR.N<br>R.FSGTSGLSIGHVPEAAEGTIGLVENGLINIDIPSR.T<br>K.FFMAAPGGVPTQTAFSQAR.R<br>K.GDAAWQPAKPR.P<br>K.EVALDLVDMVAAADEK.Y<br>K.DSDFGKPIAVNSFTQFVPGHVHLK.D<br>K.ITPGMLMAALR.I<br>K.GKEVALDLVDMVAAADEK.Y<br>K.TAGVDESILK.F<br>K.VFESQDAAVAGILTGQVEAGDVVIR.Y<br>K.GGPGMQLYPTSYLKS<br>R.SADHAFSK.D<br>R.AGLLHAHLPTVHSATLGDALNK.W<br>K.EFNTIADDGIAMGDMGLYSLPSR.D<br>R.TNDPEVQK.F<br>K.SDVHMEVDVHR.A<br>R.INIPVVFVSGPMEAGK.V<br>R.AGLLHAHLPTVHSATLGDALNKWDIAR.T<br>K.GLGAACALVTDGR.F<br>K.FFMAAPGGVPTQTAFSQAR.R<br>K.DGGLAVLSGNVAPDGCIVK.T<br>R.KVSVLQAYAAITTSAAAR.G<br>R.EIEAAGVAK.E<br>R.VIGLLEGQVDFPGEILPALLSAPHSR.R<br>R.FGDIAVEVPPFAFLQPTAAQQAALVDVAVR.A<br>K.LQLLDQGVLELLEGVK.A<br>R.RPLVPTLNR.F<br>R.LRDDGIIPGNR.A<br>R.FAVDQGDGLEILWQDRPTVR.F<br>R.DRVIGLLEGQVDFPGEILPALLSAPHSR.R<br>R.AIGDASTVADLFAVGTALSVLQAGR.K<br>R.ADYQVDDLIQK.Q<br>K.EADLPEIAALSHLIFNSPGQIAR.F<br>R.VNPMHSEGEVAK.Y<br>R.AGDPGFATR.F<br>R.FAPLDQHYSMVK.T<br>R.FDTRVPSAVVDAAK.I<br>R.YFQTPLLSPEYQDDIGAWGK.G<br>K.IVTPNGVQTFEVLVGGAR.Q<br>R.YRDDAIELIEHLQK.R<br>K.RPDLHAYVGVQGDIFR.K<br>K.EVAALAEALPYQGEFTIAK.A<br>K.TWIGIATLGLK.D<br>K.TAEVDADHIDATAALR.Q<br>K.DAGLMALLGSFDPGVTSVFTTWLR.K<br>K.HGLPWQVK.E<br>R.IDPVVYEGKEIVPLQFLK.A<br>K.VLVIGAGGVSVAVHK.M<br>K.GKTIWGIATLGLK.D<br>R.HWENGDMVETPPMSVK.Q<br>K.NMYLMYHEEIESLK.T<br>K.MAMNSDIFPDTLASR.R<br>K.FKCDIAGSVK.A<br>K.DAGLMALLGSFDPGVTSVFTTWLR.K<br>K.AVLPEPAGSLGGTK.G<br>R.IDPVVYEGK.E<br>R.FKDAGLMALLGSFDPGVTSVFTTWLR.K<br>K.VTFPTDALTSLVGGVNDLQFAEISE.<br>K.VAALLPQTPLLLEVDGR.T<br>R.LTDTPEQAAAGVGVSGNHAQGVAAAK.R<br>R.LHLVIEPQGAALAAVLAKG.V<br>K.AESLQVQAFK.I<br>K.AEAPAPAEITTTITFPVDTVPAEEVDATAPHR.F<br>R.GTYDGTSEHQIFTR.G<br>R.RASGDETLK.Y<br>R.GGEDLTLR.R<br>K.WFVGEVHYATTAGPGQYK.L<br>R.QFDVSVIVTYDR.V<br>K.ELIAEIVAMR.A<br>R.SYAPGFITTSLSPLVAGVLSVR.H<br>R.DAQQAAAAVLLK.Q<br>R.DAGLPVMDSTTHIVPLMVGDPVR.A<br>K.KISDILLAEYGVYQPINPFTVPR.G<br>K.ISDILLAEYGVYQPINPFTVPR.G<br>K.AFGVMGGYIAADR.N<br>R.GGGITRDEAAHR.V<br>R.ELTSALVEIWRLELQKQ.A<br>K.EGALLFTSGYISNEATLGLK.L<br>K.VIEAMEAALHDVAGSGGTR.N<br>R.VTIECTLQK.A<br>R.FTPGPAHDEAMMR.E<br>R.ALLPTAVIYAADYAGLPGYR.K<br>R.SDERPPPLAVLAPYIGSIETV.<br>R.GVALIDGAEIAR.R<br>R.LRGETVDPVIAR.A<br>K.SVIGVLSGTEATR.Q<br>R.IAHLTDGQAWPAIAPVGIIVTR.S<br>R.QIGSGNIGATNLR.T<br>R.KGLAAATLLLDGAK.G<br>K.GLAAATLLLDGAK.G<br>K.GAAAVLLAR.H<br>R.HIFSDEDIYSPLLR.D<br>R.FGSGEALDAPDLVLR.G<br>R.QALVDLLGPTVTVDELVR.Q<br>R.DGATLQTADEVEIAGPIDRR.M<br>R.YGPVTDGTTNATLPK.T<br>K.AGHFTVDIVETKPLTR.N<br>R.LIATDPRREGAISHVQELLR.S<br>K.FRFGFALYDEGRDDAEDEDAR.L<br>R.TSVLSDGTGK.T<br>K.DIPAEDFDLYALR.L<br>R.YVGYDFTAEEELDDVSGGR.A<br>R.LSITSEADAR.A<br>R.ELDTLIDAYR.A<br>R.AQVQAVLER.F<br>K.TTDPATLMEEAIALIDAR.A<br>R.YDGGYVDPKPR.Q<br>R.FGPIYQLGEGSEAK.R |
| YP_616236 | Sala_1187 | 4-(cytidine 5'-diphospho)-2-C-methyl-D-erythritol kinase | 13.43%            | 3                       | R.YGADRVPPLAVR.L<br>R.IAGVPVLLVNR.Q<br>R.QDLVGDAGQAFLAER.L<br>R.LVVDLNRREEAPGVLPASDGHAVPGNALDAAAR.E<br>R.AGGIMAILGELDR.A<br>R.TITLAVADSVLAER.R<br>R.RWDSLDR.I<br>R.RHYEEDDSVLR.N<br>R.INIPVVFVSGPMEAGK.V<br>R.HYEEGDDSVLR.N<br>R.FSGTSGLSIGHVPEAAEGTIGLVENGLINIDIPSR.T<br>K.FFMAAPGGVPTQTAFSQAR.R<br>K.GDAAWQPAKPR.P<br>K.EVALDLVDMVAAADEK.Y<br>K.DSDFGKPIAVNSFTQFVPGHVHLK.D<br>K.ITPGMLMAALR.I<br>K.GKEVALDLVDMVAAADEK.Y<br>K.TAGVDESILK.F<br>K.VFESQDAAVAGILTGQVEAGDVVIR.Y<br>K.GGPGMQLYPTSYLKS<br>R.SADHAFSK.D<br>R.AGLLHAHLPTVHSATLGDALNK.W<br>K.EFNTIADDGIAMGDMGLYSLPSR.D<br>R.TNDPEVQK.F<br>K.SDVHMEVDVHR.A<br>R.INIPVVFVSGPMEAGK.V<br>R.AGLLHAHLPTVHSATLGDALNKWDIAR.T<br>K.GLGAACALVTDGR.F<br>K.FFMAAPGGVPTQTAFSQAR.R<br>K.DGGLAVLSGNVAPDGCIVK.T<br>R.KVSVLQAYAAITTSAAAR.G<br>R.EIEAAGVAK.E<br>R.VIGLLEGQVDFPGEILPALLSAPHSR.R<br>R.FGDIAVEVPPFAFLQPTAAQQAALVDVAVR.A<br>K.LQLLDQGVLELLEGVK.A<br>R.RPLVPTLNR.F<br>R.LRDDGIIPGNR.A<br>R.FAVDQGDGLEILWQDRPTVR.F<br>R.DRVIGLLEGQVDFPGEILPALLSAPHSR.R<br>R.AIGDASTVADLFAVGTALSVLQAGR.K<br>R.ADYQVDDLIQK.Q<br>K.EADLPEIAALSHLIFNSPGQIAR.F<br>R.VNPMHSEGEVAK.Y<br>R.AGDPGFATR.F<br>R.FAPLDQHYSMVK.T<br>R.FDTRVPSAVVDAAK.I<br>R.YFQTPLLSPEYQDDIGAWGK.G<br>K.IVTPNGVQTFEVLVGGAR.Q<br>R.YRDDAIELIEHLQK.R<br>K.RPDLHAYVGVQGDIFR.K<br>K.EVAALAEALPYQGEFTIAK.A<br>K.TWIGIATLGLK.D<br>K.TAEVDADHIDATAALR.Q<br>K.DAGLMALLGSFDPGVTSVFTTWLR.K<br>K.HGLPWQVK.E<br>R.IDPVVYEGKEIVPLQFLK.A<br>K.VLVIGAGGVSVAVHK.M<br>K.GKTIWGIATLGLK.D<br>R.HWENGDMVETPPMSVK.Q<br>K.NMYLMYHEEIESLK.T<br>K.MAMNSDIFPDTLASR.R<br>K.FKCDIAGSVK.A<br>K.DAGLMALLGSFDPGVTSVFTTWLR.K<br>K.AVLPEPAGSLGGTK.G<br>R.IDPVVYEGK.E<br>R.FKDAGLMALLGSFDPGVTSVFTTWLR.K<br>K.VTFPTDALTSLVGGVNDLQFAEISE.<br>K.VAALLPQTPLLLEVDGR.T<br>R.LTDTPEQAAAGVGVSGNHAQGVAAAK.R<br>R.LHLVIEPQGAALAAVLAKG.V<br>K.AESLQVQAFK.I<br>K.AEAPAPAEITTTITFPVDTVPAEEVDATAPHR.F<br>R.GTYDGTSEHQIFTR.G<br>R.RASGDETLK.Y<br>R.GGEDLTLR.R<br>K.WFVGEVHYATTAGPGQYK.L<br>R.QFDVSVIVTYDR.V<br>K.ELIAEIVAMR.A<br>R.SYAPGFITTSLSPLVAGVLSVR.H<br>R.DAQQAAAAVLLK.Q<br>R.DAGLPVMDSTTHIVPLMVGDPVR.A<br>K.KISDILLAEYGVYQPINPFTVPR.G<br>K.ISDILLAEYGVYQPINPFTVPR.G<br>K.AFGVMGGYIAADR.N<br>R.GGGITRDEAAHR.V<br>R.ELTSALVEIWRLELQKQ.A<br>K.EGALLFTSGYISNEATLGLK.L<br>K.VIEAMEAALHDVAGSGGTR.N<br>R.VTIECTLQK.A<br>R.FTPGPAHDEAMMR.E<br>R.ALLPTAVIYAADYAGLPGYR.K<br>R.SDERPPPLAVLAPYIGSIETV.<br>R.GVALIDGAEIAR.R<br>R.LRGETVDPVIAR.A<br>K.SVIGVLSGTEATR.Q<br>R.IAHLTDGQAWPAIAPVGIIVTR.S<br>R.QIGSGNIGATNLR.T<br>R.KGLAAATLLLDGAK.G<br>K.GLAAATLLLDGAK.G<br>K.GAAAVLLAR.H<br>R.HIFSDEDIYSPLLR.D<br>R.FGSGEALDAPDLVLR.G<br>R.QALVDLLGPTVTVDELVR.Q<br>R.DGATLQTADEVEIAGPIDRR.M<br>R.YGPVTDGTTNATLPK.T<br>K.AGHFTVDIVETKPLTR.N<br>R.LIATDPRREGAISHVQELLR.S<br>K.FRFGFALYDEGRDDAEDEDAR.L<br>R.TSVLSDGTGK.T<br>K.DIPAEDFDLYALR.L<br>R.YVGYDFTAEEELDDVSGGR.A<br>R.LSITSEADAR.A<br>R.ELDTLIDAYR.A<br>R.AQVQAVLER.F<br>K.TTDPATLMEEAIALIDAR.A<br>R.YDGGYVDPKPR.Q<br>R.FGPIYQLGEGSEAK.R                                                                                                                                                                                                                                                                                                                                                                                                                                                                                  |
| YP_616237 | Sala_1188 | N-formylglutamate amidohydrolase                         | 20.58%            | 2                       | R.YGADRVPPLAVR.L<br>R.IAGVPVLLVNR.Q<br>R.QDLVGDAGQAFLAER.L<br>R.LVVDLNRREEAPGVLPASDGHAVPGNALDAAAR.E<br>R.AGGIMAILGELDR.A<br>R.TITLAVADSVLAER.R<br>R.RWDSLDR.I<br>R.RHYEEDDSVLR.N<br>R.INIPVVFVSGPMEAGK.V<br>R.HYEEGDDSVLR.N<br>R.FSGTSGLSIGHVPEAAEGTIGLVENGLINIDIPSR.T<br>K.FFMAAPGGVPTQTAFSQAR.R<br>K.GDAAWQPAKPR.P<br>K.EVALDLVDMVAAADEK.Y<br>K.DSDFGKPIAVNSFTQFVPGHVHLK.D<br>K.ITPGMLMAALR.I<br>K.GKEVALDLVDMVAAADEK.Y<br>K.TAGVDESILK.F<br>K.VFESQDAAVAGILTGQVEAGDVVIR.Y<br>K.GGPGMQLYPTSYLKS<br>R.SADHAFSK.D<br>R.AGLLHAHLPTVHSATLGDALNK.W<br>K.EFNTIADDGIAMGDMGLYSLPSR.D<br>R.TNDPEVQK.F<br>K.SDVHMEVDVHR.A<br>R.INIPVVFVSGPMEAGK.V<br>R.AGLLHAHLPTVHSATLGDALNKWDIAR.T<br>K.GLGAACALVTDGR.F<br>K.FFMAAPGGVPTQTAFSQAR.R<br>K.DGGLAVLSGNVAPDGCIVK.T<br>R.KVSVLQAYAAITTSAAAR.G<br>R.EIEAAGVAK.E<br>R.VIGLLEGQVDFPGEILPALLSAPHSR.R<br>R.FGDIAVEVPPFAFLQPTAAQQAALVDVAVR.A<br>K.LQLLDQGVLELLEGVK.A<br>R.RPLVPTLNR.F<br>R.LRDDGIIPGNR.A<br>R.FAVDQGDGLEILWQDRPTVR.F<br>R.DRVIGLLEGQVDFPGEILPALLSAPHSR.R<br>R.AIGDASTVADLFAVGTALSVLQAGR.K<br>R.ADYQVDDLIQK.Q<br>K.EADLPEIAALSHLIFNSPGQIAR.F<br>R.VNPMHSEGEVAK.Y<br>R.AGDPGFATR.F<br>R.FAPLDQHYSMVK.T<br>R.FDTRVPSAVVDAAK.I<br>R.YFQTPLLSPEYQDDIGAWGK.G<br>K.IVTPNGVQTFEVLVGGAR.Q<br>R.YRDDAIELIEHLQK.R<br>K.RPDLHAYVGVQGDIFR.K<br>K.EVAALAEALPYQGEFTIAK.A<br>K.TWIGIATLGLK.D<br>K.TAEVDADHIDATAALR.Q<br>K.DAGLMALLGSFDPGVTSVFTTWLR.K<br>K.HGLPWQVK.E<br>R.IDPVVYEGKEIVPLQFLK.A<br>K.VLVIGAGGVSVAVHK.M<br>K.GKTIWGIATLGLK.D<br>R.HWENGDMVETPPMSVK.Q<br>K.NMYLMYHEEIESLK.T<br>K.MAMNSDIFPDTLASR.R<br>K.FKCDIAGSVK.A<br>K.DAGLMALLGSFDPGVTSVFTTWLR.K<br>K.AVLPEPAGSLGGTK.G<br>R.IDPVVYEGK.E<br>R.FKDAGLMALLGSFDPGVTSVFTTWLR.K<br>K.VTFPTDALTSLVGGVNDLQFAEISE.<br>K.VAALLPQTPLLLEVDGR.T<br>R.LTDTPEQAAAGVGVSGNHAQGVAAAK.R<br>R.LHLVIEPQGAALAAVLAKG.V<br>K.AESLQVQAFK.I<br>K.AEAPAPAEITTTITFPVDTVPAEEVDATAPHR.F<br>R.GTYDGTSEHQIFTR.G<br>R.RASGDETLK.Y<br>R.GGEDLTLR.R<br>K.WFVGEVHYATTAGPGQYK.L<br>R.QFDVSVIVTYDR.V<br>K.ELIAEIVAMR.A<br>R.SYAPGFITTSLSPLVAGVLSVR.H<br>R.DAQQAAAAVLLK.Q<br>R.DAGLPVMDSTTHIVPLMVGDPVR.A<br>K.KISDILLAEYGVYQPINPFTVPR.G<br>K.ISDILLAEYGVYQPINPFTVPR.G<br>K.AFGVMGGYIAADR.N<br>R.GGGITRDEAAHR.V<br>R.ELTSALVEIWRLELQKQ.A<br>K.EGALLFTSGYISNEATLGLK.L<br>K.VIEAMEAALHDVAGSGGTR.N<br>R.VTIECTLQK.A<br>R.FTPGPAHDEAMMR.E<br>R.ALLPTAVIYAADYAGLPGYR.K<br>R.SDERPPPLAVLAPYIGSIETV.<br>R.GVALIDGAEIAR.R<br>R.LRGETVDPVIAR.A<br>K.SVIGVLSGTEATR.Q<br>R.IAHLTDGQAWPAIAPVGIIVTR.S<br>R.QIGSGNIGATNLR.T<br>R.KGLAAATLLLDGAK.G<br>K.GLAAATLLLDGAK.G<br>K.GAAAVLLAR.H<br>R.HIFSDEDIYSPLLR.D<br>R.FGSGEALDAPDLVLR.G<br>R.QALVDLLGPTVTVDELVR.Q<br>R.DGATLQTADEVEIAGPIDRR.M<br>R.YGPVTDGTTNATLPK.T<br>K.AGHFTVDIVETKPLTR.N<br>R.LIATDPRREGAISHVQELLR.S<br>K.FRFGFALYDEGRDDAEDEDAR.L<br>R.TSVLSDGTGK.T<br>K.DIPAEDFDLYALR.L<br>R.YVGYDFTAEEELDDVSGGR.A<br>R.LSITSEADAR.A<br>R.ELDTLIDAYR.A<br>R.AQVQAVLER.F<br>K.TTDPATLMEEAIALIDAR.A<br>R.YDGGYVDPKPR.Q<br>R.FGPIYQLGEGSEAK.R                                                                                                                                                                                                                                                                                                                                                                                                                                                                                  |
| YP_616238 | Sala_1189 | dihydroxy-acid dehydratase                               | 61.55%            | 29                      | R.YGADRVPPLAVR.L<br>R.IAGVPVLLVNR.Q<br>R.QDLVGDAGQAFLAER.L<br>R.LVVDLNRREEAPGVLPASDGHAVPGNALDAAAR.E<br>R.AGGIMAILGELDR.A<br>R.TITLAVADSVLAER.R<br>R.RWDSLDR.I<br>R.RHYEEDDSVLR.N<br>R.INIPVVFVSGPMEAGK.V<br>R.HYEEGDDSVLR.N<br>R.FSGTSGLSIGHVPEAAEGTIGLVENGLINIDIPSR.T<br>K.FFMAAPGGVPTQTAFSQAR.R<br>K.GDAAWQPAKPR.P<br>K.EVALDLVDMVAAADEK.Y<br>K.DSDFGKPIAVNSFTQFVPGHVHLK.D<br>K.ITPGMLMAALR.I<br>K.GKEVALDLVDMVAAADEK.Y<br>K.TAGVDESILK.F<br>K.VFESQDAAVAGILTGQVEAGDVVIR.Y<br>K.GGPGMQLYPTSYLKS<br>R.SADHAFSK.D<br>R.AGLLHAHLPTVHSATLGDALNK.W<br>K.EFNTIADDGIAMGDMGLYSLPSR.D<br>R.TNDPEVQK.F<br>K.SDVHMEVDVHR.A<br>R.INIPVVFVSGPMEAGK.V<br>R.AGLLHAHLPTVHSATLGDALNKWDIAR.T<br>K.GLGAACALVTDGR.F<br>K.FFMAAPGGVPTQTAFSQAR.R<br>K.DGGLAVLSGNVAPDGCIVK.T<br>R.KVSVLQAYAAITTSAAAR.G<br>R.EIEAAGVAK.E<br>R.VIGLLEGQVDFPGEILPALLSAPHSR.R<br>R.FGDIAVEVPPFAFLQPTAAQQAALVDVAVR.A<br>K.LQLLDQGVLELLEGVK.A<br>R.RPLVPTLNR.F<br>R.LRDDGIIPGNR.A<br>R.FAVDQGDGLEILWQDRPTVR.F<br>R.DRVIGLLEGQVDFPGEILPALLSAPHSR.R<br>R.AIGDASTVADLFAVGTALSVLQAGR.K<br>R.ADYQVDDLIQK.Q<br>K.EADLPEIAALSHLIFNSPGQIAR.F<br>R.VNPMHSEGEVAK.Y<br>R.AGDPGFATR.F<br>R.FAPLDQHYSMVK.T<br>R.FDTRVPSAVVDAAK.I<br>R.YFQTPLLSPEYQDDIGAWGK.G<br>K.IVTPNGVQTFEVLVGGAR.Q<br>R.YRDDAIELIEHLQK.R<br>K.RPDLHAYVGVQGDIFR.K<br>K.EVAALAEALPYQGEFTIAK.A<br>K.TWIGIATLGLK.D<br>K.TAEVDADHIDATAALR.Q<br>K.DAGLMALLGSFDPGVTSVFTTWLR.K<br>K.HGLPWQVK.E<br>R.IDPVVYEGKEIVPLQFLK.A<br>K.VLVIGAGGVSVAVHK.M<br>K.GKTIWGIATLGLK.D<br>R.HWENGDMVETPPMSVK.Q<br>K.NMYLMYHEEIESLK.T<br>K.MAMNSDIFPDTLASR.R<br>K.FKCDIAGSVK.A<br>K.DAGLMALLGSFDPGVTSVFTTWLR.K<br>K.AVLPEPAGSLGGTK.G<br>R.IDPVVYEGK.E<br>R.FKDAGLMALLGSFDPGVTSVFTTWLR.K<br>K.VTFPTDALTSLVGGVNDLQFAEISE.<br>K.VAALLPQTPLLLEVDGR.T<br>R.LTDTPEQAAAGVGVSGNHAQGVAAAK.R<br>R.LHLVIEPQGAALAAVLAKG.V<br>K.AESLQVQAFK.I<br>K.AEAPAPAEITTTITFPVDTVPAEEVDATAPHR.F<br>R.GTYDGTSEHQIFTR.G<br>R.RASGDETLK.Y<br>R.GGEDLTLR.R<br>K.WFVGEVHYATTAGPGQYK.L<br>R.QFDVSVIVTYDR.V<br>K.ELIAEIVAMR.A<br>R.SYAPGFITTSLSPLVAGVLSVR.H<br>R.DAQQAAAAVLLK.Q<br>R.DAGLPVMDSTTHIVPLMVGDPVR.A<br>K.KISDILLAEYGVYQPINPFTVPR.G<br>K.ISDILLAEYGVYQPINPFTVPR.G<br>K.AFGVMGGYIAADR.N<br>R.GGGITRDEAAHR.V<br>R.ELTSALVEIWRLELQKQ.A<br>K.EGALLFTSGYISNEATLGLK.L<br>K.VIEAMEAALHDVAGSGGTR.N<br>R.VTIECTLQK.A<br>R.FTPGPAHDEAMMR.E<br>R.ALLPTAVIYAADYAGLPGYR.K<br>R.SDERPPPLAVLAPYIGSIETV.<br>R.GVALIDGAEIAR.R<br>R.LRGETVDPVIAR.A<br>K.SVIGVLSGTEATR.Q<br>R.IAHLTDGQAWPAIAPVGIIVTR.S<br>R.QIGSGNIGATNLR.T<br>R.KGLAAATLLLDGAK.G<br>K.GLAAATLLLDGAK.G<br>K.GAAAVLLAR.H<br>R.HIFSDEDIYSPLLR.D<br>R.FGSGEALDAPDLVLR.G<br>R.QALVDLLGPTVTVDELVR.Q<br>R.DGATLQTADEVEIAGPIDRR.M<br>R.YGPVTDGTTNATLPK.T<br>K.AGHFTVDIVETKPLTR.N<br>R.LIATDPRREGAISHVQELLR.S<br>K.FRFGFALYDEGRDDAEDEDAR.L<br>R.TSVLSDGTGK.T<br>K.DIPAEDFDLYALR.L<br>R.YVGYDFTAEEELDDVSGGR.A<br>R.LSITSEADAR.A<br>R.ELDTLIDAYR.A<br>R.AQVQAVLER.F<br>K.TTDPATLMEEAIALIDAR.A<br>R.YDGGYVDPKPR.Q<br>R.FGPIYQLGEGSEAK.R                                                                                                                                                                                                                                                                                                                                                                                                                                                                                  |
| YP_616241 | Sala_1192 | (Uracil-5)-methyltransferase                             | 36.09%            | 8                       | R.YGADRVPPLAVR.L<br>R.IAGVPVLLVNR.Q<br>R.QDLVGDAGQAFLAER.L<br>R.LVVDLNRREEAPGVLPASDGHAVPGNALDAAAR.E<br>R.AGGIMAILGELDR.A<br>R.TITLAVADSVLAER.R<br>R.RWDSLDR.I<br>R.RHYEEDDSVLR.N<br>R.INIPVVFVSGPMEAGK.V<br>R.HYEEGDDSVLR.N<br>R.FSGTSGLSIGHVPEAAEGTIGLVENGLINIDIPSR.T<br>K.FFMAAPGGVPTQTAFSQAR.R<br>K.GDAAWQPAKPR.P<br>K.EVALDLVDMVAAADEK.Y<br>K.DSDFGKPIAVNSFTQFVPGHVHLK.D<br>K.ITPGMLMAALR.I<br>K.GKEVALDLVDMVAAADEK.Y<br>K.TAGVDESILK.F<br>K.VFESQDAAVAGILTGQVEAGDVVIR.Y<br>K.GGPGMQLYPTSYLKS<br>R.SADHAFSK.D<br>R.AGLLHAHLPTVHSATLGDALNK.W<br>K.EFNTIADDGIAMGDMGLYSLPSR.D<br>R.TNDPEVQK.F<br>K.SDVHMEVDVHR.A<br>R.INIPVVFVSGPMEAGK.V<br>R.AGLLHAHLPTVHSATLGDALNKWDIAR.T<br>K.GLGAACALVTDGR.F<br>K.FFMAAPGGVPTQTAFSQAR.R<br>K.DGGLAVLSGNVAPDGCIVK.T<br>R.KVSVLQAYAAITTSAAAR.G<br>R.EIEAAGVAK.E<br>R.VIGLLEGQVDFPGEILPALLSAPHSR.R<br>R.FGDIAVEVPPFAFLQPTAAQQAALVDVAVR.A<br>K.LQLLDQGVLELLEGVK.A<br>R.RPLVPTLNR.F<br>R.LRDDGIIPGNR.A<br>R.FAVDQGDGLEILWQDRPTVR.F<br>R.DRVIGLLEGQVDFPGEILPALLSAPHSR.R<br>R.AIGDASTVADLFAVGTALSVLQAGR.K<br>R.ADYQVDDLIQK.Q<br>K.EADLPEIAALSHLIFNSPGQIAR.F<br>R.VNPMHSEGEVAK.Y<br>R.AGDPGFATR.F<br>R.FAPLDQHYSMVK.T<br>R.FDTRVPSAVVDAAK.I<br>R.YFQTPLLSPEYQDDIGAWGK.G<br>K.IVTPNGVQTFEVLVGGAR.Q<br>R.YRDDAIELIEHLQK.R<br>K.RPDLHAYVGVQGDIFR.K<br>K.EVAALAEALPYQGEFTIAK.A<br>K.TWIGIATLGLK.D<br>K.TAEVDADHIDATAALR.Q<br>K.DAGLMALLGSFDPGVTSVFTTWLR.K<br>K.HGLPWQVK.E<br>R.IDPVVYEGKEIVPLQFLK.A<br>K.VLVIGAGGVSVAVHK.M<br>K.GKTIWGIATLGLK.D<br>R.HWENGDMVETPPMSVK.Q<br>K.NMYLMYHEEIESLK.T<br>K.MAMNSDIFPDTLASR.R<br>K.FKCDIAGSVK.A<br>K.DAGLMALLGSFDPGVTSVFTTWLR.K<br>K.AVLPEPAGSLGGTK.G<br>R.IDPVVYEGK.E<br>R.FKDAGLMALLGSFDPGVTSVFTTWLR.K<br>K.VTFPTDALTSLVGGVNDLQFAEISE.<br>K.VAALLPQTPLLLEVDGR.T<br>R.LTDTPEQAAAGVGVSGNHAQGVAAAK.R<br>R.LHLVIEPQGAALAAVLAKG.V<br>K.AESLQVQAFK.I<br>K.AEAPAPAEITTTITFPVDTVPAEEVDATAPHR.F<br>R.GTYDGTSEHQIFTR.G<br>R.RASGDETLK.Y<br>R.GGEDLTLR.R<br>K.WFVGEVHYATTAGPGQYK.L<br>R.QFDVSVIVTYDR.V<br>K.ELIAEIVAMR.A<br>R.SYAPGFITTSLSPLVAGVLSVR.H<br>R.DAQQAAAAVLLK.Q<br>R.DAGLPVMDSTTHIVPLMVGDPVR.A<br>K.KISDILLAEYGVYQPINPFTVPR.G<br>K.ISDILLAEYGVYQPINPFTVPR.G<br>K.AFGVMGGYIAADR.N<br>R.GGGITRDEAAHR.V<br>R.ELTSALVEIWRLELQKQ.A<br>K.EGALLFTSGYISNEATLGLK.L<br>K.VIEAMEAALHDVAGSGGTR.N<br>R.VTIECTLQK.A<br>R.FTPGPAHDEAMMR.E<br>R.ALLPTAVIYAADYAGLPGYR.K<br>R.SDERPPPLAVLAPYIGSIETV.<br>R.GVALIDGAEIAR.R<br>R.LRGETVDPVIAR.A<br>K.SVIGVLSGTEATR.Q<br>R.IAHLTDGQAWPAIAPVGIIVTR.S<br>R.QIGSGNIGATNLR.T<br>R.KGLAAATLLLDGAK.G<br>K.GLAAATLLLDGAK.G<br>K.GAAAVLLAR.H<br>R.HIFSDEDIYSPLLR.D<br>R.FGSGEALDAPDLVLR.G<br>R.QALVDLLGPTVTVDELVR.Q<br>R.DGATLQTADEVEIAGPIDRR.M<br>R.YGPVTDGTTNATLPK.T<br>K.AGHFTVDIVETKPLTR.N<br>R.LIATDPRREGAISHVQELLR.S<br>K.FRFGFALYDEGRDDAEDEDAR.L<br>R.TSVLSDGTGK.T<br>K.DIPAEDFDLYALR.L<br>R.YVGYDFTAEEELDDVSGGR.A<br>R.LSITSEADAR.A<br>R.ELDTLIDAYR.A<br>R.AQVQAVLER.F<br>K.TTDPATLMEEAIALIDAR.A<br>R.YDGGYVDPKPR.Q<br>R.FGPIYQLGEGSEAK.R                                                                                                                                                                                                                                                                                                                                                                                                                                                                                  |
| YP_616247 | Sala_1198 | Orn/DAP/Arg decarboxylase 2                              | 22.56%            | 6                       | R.YGADRVPPLAVR.L<br>R.IAGVPVLLVNR.Q<br>R.QDLVGDAGQAFLAER.L<br>R.LVVDLNRREEAPGVLPASDGHAVPGNALDAAAR.E<br>R.AGGIMAILGELDR.A<br>R.TITLAVADSVLAER.R<br>R.RWDSLDR.I<br>R.RHYEEDDSVLR.N<br>R.INIPVVFVSGPMEAGK.V<br>R.HYEEGDDSVLR.N<br>R.FSGTSGLSIGHVPEAAEGTIGLVENGLINIDIPSR.T<br>K.FFMAAPGGVPTQTAFSQAR.R<br>K.GDAAWQPAKPR.P<br>K.EVALDLVDMVAAADEK.Y<br>K.DSDFGKPIAVNSFTQFVPGHVHLK.D<br>K.ITPGMLMAALR.I<br>K.GKEVALDLVDMVAAADEK.Y<br>K.TAGVDESILK.F<br>K.VFESQDAAVAGILTGQVEAGDVVIR.Y<br>K.GGPGMQLYPTSYLKS<br>R.SADHAFSK.D<br>R.AGLLHAHLPTVHSATLGDALNK.W<br>K.EFNTIADDGIAMGDMGLYSLPSR.D<br>R.TNDPEVQK.F<br>K.SDVHMEVDVHR.A<br>R.INIPVVFVSGPMEAGK.V<br>R.AGLLHAHLPTVHSATLGDALNKWDIAR.T<br>K.GLGAACALVTDGR.F<br>K.FFMAAPGGVPTQTAFSQAR.R<br>K.DGGLAVLSGNVAPDGCIVK.T<br>R.KVSVLQAYAAITTSAAAR.G<br>R.EIEAAGVAK.E<br>R.VIGLLEGQVDFPGEILPALLSAPHSR.R<br>R.FGDIAVEVPPFAFLQPTAAQQAALVDVAVR.A<br>K.LQLLDQGVLELLEGVK.A<br>R.RPLVPTLNR.F<br>R.LRDDGIIPGNR.A<br>R.FAVDQGDGLEILWQDRPTVR.F<br>R.DRVIGLLEGQVDFPGEILPALLSAPHSR.R<br>R.AIGDASTVADLFAVGTALSVLQAGR.K<br>R.ADYQVDDLIQK.Q<br>K.EADLPEIAALSHLIFNSPGQIAR.F<br>R.VNPMHSEGEVAK.Y<br>R.AGDPGFATR.F<br>R.FAPLDQHYSMVK.T<br>R.FDTRVPSAVVDAAK.I<br>R.YFQTPLLSPEYQDDIGAWGK.G<br>K.IVTPNGVQTFEVLVGGAR.Q<br>R.YRDDAIELIEHLQK.R<br>K.RPDLHAYVGVQGDIFR.K<br>K.EVAALAEALPYQGEFTIAK.A<br>K.TWIGIATLGLK.D<br>K.TAEVDADHIDATAALR.Q<br>K.DAGLMALLGSFDPGVTSVFTTWLR.K<br>K.HGLPWQVK.E<br>R.IDPVVYEGKEIVPLQFLK.A<br>K.VLVIGAGGVSVAVHK.M<br>K.GKTIWGIATLGLK.D<br>R.HWENGDMVETPPMSVK.Q<br>K.NMYLMYHEEIESLK.T<br>K.MAMNSDIFPDTLASR.R<br>K.FKCDIAGSVK.A<br>K.DAGLMALLGSFDPGVTSVFTTWLR.K<br>K.AVLPEPAGSLGGTK.G<br>R.IDPVVYEGK.E<br>R.FKDAGLMALLGSFDPGVTSVFTTWLR.K<br>K.VTFPTDALTSLVGGVNDLQFAEISE.<br>K.VAALLPQTPLLLEVDGR.T<br>R.LTDTPEQAAAGVGVSGNHAQGVAAAK.R<br>R.LHLVIEPQGAALAAVLAKG.V<br>K.AESLQVQAFK.I<br>K.AEAPAPAEITTTITFPVDTVPAEEVDATAPHR.F<br>R.GTYDGTSEHQIFTR.G<br>R.RASGDETLK.Y<br>R.GGEDLTLR.R<br>K.WFVGEVHYATTAGPGQYK.L<br>R.QFDVSVIVTYDR.V<br>K.ELIAEIVAMR.A<br>R.SYAPGFITTSLSPLVAGVLSVR.H<br>R.DAQQAAAAVLLK.Q<br>R.DAGLPVMDSTTHIVPLMVGDPVR.A<br>K.KISDILLAEYGVYQPINPFTVPR.G<br>K.ISDILLAEYGVYQPINPFTVPR.G<br>K.AFGVMGGYIAADR.N<br>R.GGGITRDEAAHR.V<br>R.ELTSALVEIWRLELQKQ.A<br>K.EGALLFTSGYISNEATLGLK.L<br>K.VIEAMEAALHDVAGSGGTR.N<br>R.VTIECTLQK.A<br>R.FTPGPAHDEAMMR.E<br>R.ALLPTAVIYAADYAGLPGYR.K<br>R.SDERPPPLAVLAPYIGSIETV.<br>R.GVALIDGAEIAR.R<br>R.LRGETVDPVIAR.A<br>K.SVIGVLSGTEATR.Q<br>R.IAHLTDGQAWPAIAPVGIIVTR.S<br>R.QIGSGNIGATNLR.T<br>R.KGLAAATLLLDGAK.G<br>K.GLAAATLLLDGAK.G<br>K.GAAAVLLAR.H<br>R.HIFSDEDIYSPLLR.D<br>R.FGSGEALDAPDLVLR.G<br>R.QALVDLLGPTVTVDELVR.Q<br>R.DGATLQTADEVEIAGPIDRR.M<br>R.YGPVTDGTTNATLPK.T<br>K.AGHFTVDIVETKPLTR.N<br>R.LIATDPRREGAISHVQELLR.S<br>K.FRFGFALYDEGRDDAEDEDAR.L<br>R.TSVLSDGTGK.T<br>K.DIPAEDFDLYALR.L<br>R.YVGYDFTAEEELDDVSGGR.A<br>R.LSITSEADAR.A<br>R.ELDTLIDAYR.A<br>R.AQVQAVLER.F<br>K.TTDPATLMEEAIALIDAR.A<br>R.YDGGYVDPKPR.Q<br>R.FGPIYQLGEGSEAK.R                                                                                                                                                                                                                                                                                                                                                                                                                                                                                  |
| YP_616249 | Sala_1200 | alpha/beta hydrolase fold                                | 25.55%            | 5                       | R.YGADRVPPLAVR.L<br>R.IAGVPVLLVNR.Q<br>R.QDLVGDAGQAFLAER.L<br>R.LVVDLNRREEAPGVLPASDGHAVPGNALDAAAR.E<br>R.AGGIMAILGELDR.A<br>R.TITLAVADSVLAER.R<br>R.RWDSLDR.I<br>R.RHYEEDDSVLR.N<br>R.INIPVVFVSGPMEAGK.V<br>R.HYEEGDDSVLR.N<br>R.FSGTSGLSIGHVPEAAEGTIGLVENGLINIDIPSR.T<br>K.FFMAAPGGVPTQTAFSQAR.R<br>K.GDAAWQPAKPR.P<br>K.EVALDLVDMVAAADEK.Y<br>K.DSDFGKPIAVNSFTQFVPGHVHLK.D<br>K.ITPGMLMAALR.I<br>K.GKEVALDLVDMVAAADEK.Y<br>K.TAGVDESILK.F<br>K.VFESQDAAVAGILTGQVEAGDVVIR.Y<br>K.GGPGMQLYPTSYLKS<br>R.SADHAFSK.D<br>R.AGLLHAHLPTVHSATLGDALNK.W<br>K.EFNTIADDGIAMGDMGLYSLPSR.D<br>R.TNDPEVQK.F<br>K.SDVHMEVDVHR.A<br>R.INIPVVFVSGPMEAGK.V<br>R.AGLLHAHLPTVHSATLGDALNKWDIAR.T<br>K.GLGAACALVTDGR.F<br>K.FFMAAPGGVPTQTAFSQAR.R<br>K.DGGLAVLSGNVAPDGCIVK.T<br>R.KVSVLQAYAAITTSAAAR.G<br>R.EIEAAGVAK.E<br>R.VIGLLEGQVDFPGEILPALLSAPHSR.R<br>R.FGDIAVEVPPFAFLQPTAAQQAALVDVAVR.A<br>K.LQLLDQGVLELLEGVK.A<br>R.RPLVPTLNR.F<br>R.LRDDGIIPGNR.A<br>R.FAVDQGDGLEILWQDRPTVR.F<br>R.DRVIGLLEGQVDFPGEILPALLSAPHSR.R<br>R.AIGDASTVADLFAVGTALSVLQAGR.K<br>R.ADYQVDDLIQK.Q<br>K.EADLPEIAALSHLIFNSPGQIAR.F<br>R.VNPMHSEGEVAK.Y<br>R.AGDPGFATR.F<br>R.FAPLDQHYSMVK.T<br>R.FDTRVPSAVVDAAK.I<br>R.YFQTPLLSPEYQDDIGAWGK.G<br>K.IVTPNGVQTFEVLVGGAR.Q<br>R.YRDDAIELIEHLQK.R<br>K.RPDLHAYVGVQGDIFR.K<br>K.EVAALAEALPYQGEFTIAK.A<br>K.TWIGIATLGLK.D<br>K.TAEVDADHIDATAALR.Q<br>K.DAGLMALLGSFDPGVTSVFTTWLR.K<br>K.HGLPWQVK.E<br>R.IDPVVYEGKEIVPLQFLK.A<br>K.VLVIGAGGVSVAVHK.M<br>K.GKTIWGIATLGLK.D<br>R.HWENGDMVETPPMSVK.Q<br>K.NMYLMYHEEIESLK.T<br>K.MAMNSDIFPDTLASR.R<br>K.FKCDIAGSVK.A<br>K.DAGLMALLGSFDPGVTSVFTTWLR.K<br>K.AVLPEPAGSLGGTK.G<br>R.IDPVVYEGK.E<br>R.FKDAGLMALLGSFDPGVTSVFTTWLR.K<br>K.VTFPTDALTSLVGGVNDLQFAEISE.<br>K.VAALLPQTPLLLEVDGR.T<br>R.LTDTPEQAAAGVGVSGNHAQGVAAAK.R<br>R.LHLVIEPQGAALAAVLAKG.V<br>K.AESLQVQAFK.I<br>K.AEAPAPAEITTTITFPVDTVPAEEVDATAPHR.F<br>R.GTYDGTSEHQIFTR.G<br>R.RASGDETLK.Y<br>R.GGEDLTLR.R<br>K.WFVGEVHYATTAGPGQYK.L<br>R.QFDVSVIVTYDR.V<br>K.ELIAEIVAMR.A<br>R.SYAPGFITTSLSPLVAGVLSVR.H<br>R.DAQQAAAAVLLK.Q<br>R.DAGLPVMDSTTHIVPLMVGDPVR.A<br>K.KISDILLAEYGVYQPINPFTVPR.G<br>K.ISDILLAEYGVYQPINPFTVPR.G<br>K.AFGVMGGYIAADR.N<br>R.GGGITRDEAAHR.V<br>R.ELTSALVEIWRLELQKQ.A<br>K.EGALLFTSGYISNEATLGLK.L<br>K.VIEAMEAALHDVAGSGGTR.N<br>R.VTIECTLQK.A<br>R.FTPGPAHDEAMMR.E<br>R.ALLPTAVIYAADYAGLPGYR.K<br>R.SDERPPPLAVLAPYIGSIETV.<br>R.GVALIDGAEIAR.R<br>R.LRGETVDPVIAR.A<br>K.SVIGVLSGTEATR.Q<br>R.IAHLTDGQAWPAIAPVGIIVTR.S<br>R.QIGSGNIGATNLR.T<br>R.KGLAAATLLLDGAK.G<br>K.GLAAATLLLDGAK.G<br>K.GAAAVLLAR.H<br>R.HIFSDEDIYSPLLR.D<br>R.FGSGEALDAPDLVLR.G<br>R.QALVDLLGPTVTVDELVR.Q<br>R.DGATLQTADEVEIAGPIDRR.M<br>R.YGPVTDGTTNATLPK.T<br>K.AGHFTVDIVETKPLTR.N<br>R.LIATDPRREGAISHVQELLR.S<br>K.FRFGFALYDEGRDDAEDEDAR.L<br>R.TSVLSDGTGK.T<br>K.DIPAEDFDLYALR.L<br>R.YVGYDFTAEEELDDVSGGR.A<br>R.LSITSEADAR.A<br>R.ELDTLIDAYR.A<br>R.AQVQAVLER.F<br>K.TTDPATLMEEAIALIDAR.A<br>R.YDGGYVDPKPR.Q<br>R.FGPIYQLGEGSEAK.R                                                                                                                                                                                                                                                                                                                                                                                                                                                                                  |
| YP_616251 | Sala_1202 | Pyridoxal-5'-phosphate-dependent enzyme, beta subunit    | 31.83%            | 5                       | R.YGADRVPPLAVR.L<br>R.IAGVPVLLVNR.Q<br>R.QDLVGDAGQAFLAER.L<br>R.LVVDLNRREEAPGVLPASDGHAVPGNALDAAAR.E<br>R.AGGIMAILGELDR.A<br>R.TITLAVADSVLAER.R<br>R.RWDSLDR.I<br>R.RHYEEDDSVLR.N<br>R.INIPVVFVSGPMEAGK.V<br>R.HYEEGDDSVLR.N<br>R.FSGTSGLSIGHVPEAAEGTIGLVENGLINIDIPSR.T<br>K.FFMAAPGGVPTQTAFSQAR.R<br>K.GDAAWQPAKPR.P<br>                                                                                                                                                                                                                                                                                                                                                                                                                                                                                                                                                                                                                                                                                                                                                                                                                                                                                                                                                                                                                                                                                                                                                                                                                                                                                                                                                                                                                                                                                                                                                                                                                                                                                                                                                                                                                                                                                                                                                                                                                                                                                                                                                                                                                                                                                                                                                                                                                                                                                                                                                                                                                                                                                                                                                                                                                                                                                                                                                                                                                                                                                               |

| Accession | Locus tag | Description                                         | Sequence coverage | No. peptides identified | List of peptides identified                                                                                                                                                                                                                                                                                                                                                                                                                                                                                                                                                                                                                                                                                                                                                                                                                                                                                                                                                                                                                                                                                                                                                                                                                                                                                                                                                                                                                                                                                                                                                                                                                                                                                                                                                                                                                                                                                                                                                                                                                                                                                                                                                                                                                                                                                                                                                                                                                                                                                                                                                                                                                                                                                                                                                                                                                                                                                                                                                                                                                                                                                                                                                                                                                                                                                                                                         |
|-----------|-----------|-----------------------------------------------------|-------------------|-------------------------|---------------------------------------------------------------------------------------------------------------------------------------------------------------------------------------------------------------------------------------------------------------------------------------------------------------------------------------------------------------------------------------------------------------------------------------------------------------------------------------------------------------------------------------------------------------------------------------------------------------------------------------------------------------------------------------------------------------------------------------------------------------------------------------------------------------------------------------------------------------------------------------------------------------------------------------------------------------------------------------------------------------------------------------------------------------------------------------------------------------------------------------------------------------------------------------------------------------------------------------------------------------------------------------------------------------------------------------------------------------------------------------------------------------------------------------------------------------------------------------------------------------------------------------------------------------------------------------------------------------------------------------------------------------------------------------------------------------------------------------------------------------------------------------------------------------------------------------------------------------------------------------------------------------------------------------------------------------------------------------------------------------------------------------------------------------------------------------------------------------------------------------------------------------------------------------------------------------------------------------------------------------------------------------------------------------------------------------------------------------------------------------------------------------------------------------------------------------------------------------------------------------------------------------------------------------------------------------------------------------------------------------------------------------------------------------------------------------------------------------------------------------------------------------------------------------------------------------------------------------------------------------------------------------------------------------------------------------------------------------------------------------------------------------------------------------------------------------------------------------------------------------------------------------------------------------------------------------------------------------------------------------------------------------------------------------------------------------------------------------------|
|           |           |                                                     |                   |                         | R.LLTAFLEL.F<br>R.IAQALYEDGAIYMR.T<br>R.NPPPTTSTLQQEAA.R.K<br>K.FAQSGGNGEADNGPETLGTDPESGLEVTK.R.S<br>R.AKAERLNTFGPHPTSGGEMK.L<br>K.TGVEVERHETQPPR.Y<br>R.FGPYQLGEGSEAKR.S<br>R.YGPYLLHDGK.Y<br>R.ALDVYLVGFTLSPVLR.K<br>K.VLASYGVR.D<br>K.LGGTAEIFDGMNAAVR.I<br>R.VTFNAIK.Q<br>R.PSTYASILQVLK.D<br>R.LYELIWK.R<br>R.IAEAAANGGR.G<br>K.VGGGDHAR.L<br>K.LGFSASHMR.I<br>R.TDGVQMDGSAISAAR.K<br>R.EVGVHPESGKPIMAGLGR.Y<br>K.FAQSGGNGEADNGPETLGTDPESGLEVTK.R<br>R.SSIPKDIPEADFLLDYLALR.L<br>R.KFAQSGGNGEADNGPETLGTDPESGLEVTK.R<br>R.HETQPPR.Y<br>R.ALASQMASAR.L<br>.MQLVIVESPAK.A<br>K.MEELGIGRPSYASILQVLK.D<br>K.DRDYR.V<br>R.QLHEELPYQSTVETELFR.M<br>K.VKENWDEDR.S<br>K.STLVNVLVQK.V<br>K.LLTLATLNAK.L<br>R.RPPEYIVSR.E<br>R.VLGLVLASELYTR.F<br>R.FTLAGWGAIDGQQAAPK.H<br>K.AALQEWALR.G<br>K.AAAAALLAELGQEK.<br>R.LDLPALIR.F<br>K.YLPSFVPLIPGR.I<br>R.DGIWVWLNGLPLR.E<br>R.VIGLPGDSVELRGVWLNGLPLR.E<br>R.VIGLPGDSVELR.D<br>R.SFFLSPNIPSEMQPR.L<br>R.LLIGDYLK.M<br>K.THLDAIAIILANLAEAQDFGGR.R<br>R.VFANAVLLGVNPFQDGVGELG.E<br>R.SLGAIAFYEHR.V<br>K.LTDVAADPRAR.L<br>R.AVPGDRPSTTLLDQVSPR.S<br>K.TFTTTTLLNANSALQWLDEAGVADPVGR.F<br>R.HSDRYDVAVVSNVDGAALDEAFK.F<br>K.TLFSGGIANPTENR.A<br>K.FSPEHTLVAVASK.T<br>K.GLAEGTDFDPATQALMK.A<br>R.AAEHSAERGDGAPESVHAAQALHQR.M<br>R.HLLHIGIGGSALGPDLVVALGR.H<br>R.LLPAYLQLEMESNGK.S<br>R.GDGAPESVHAAQALHQR.M<br>R.FIALTANPGR.A<br>R.AMEWEGIDETR.I<br>R.NVADIRFPAK.T<br>R.MMIDAIEAGAFGEIR.H<br>K.THLDAIAIILANLAEAQDFGGR.K<br>R.VFANAVLLGVNPFQDGVGELGEMAK.G<br>R.KTLFSGGIANPTENR.A<br>R.LADGADNCLLAFAFDQVYANR.L<br>R.EPHLLDADHETLVANCIQAQALMAGR.A<br>K.GLAEGTDFDPATQALMK.A<br>R.YDVAVVSNVDGAALDEAFK.F<br>R.LLPAYLQLEMESNGK.S<br>R.LLPSETVGR.Y<br>R.AMEWEGIDETR.I<br>K.GLGLDEVGVDLPTGAIK.V<br>R.VDEHNQSSVSIYGVDTNR.I<br>R.LADGQELTAER.I<br>R.DNVLAEVDRLEGLYQTLDNHK.V<br>R.ATVVPQTVR.L<br>R.RVVIAGGGYIANEFAGIFNEFGSK.V<br>K.ADFDITVALHPSMAEELV.LK.<br>R.VIAGGGYIANEFAGIFNEFGSK.V<br>K.MIVNATDQVVLHMGDPAPPELLQAAIAVK.A<br>R.FDWDLR.D<br>K.GLGLDEVGVDLPTGAIK.V<br>R.IQITPVAIR.E<br>K.LLVYGAHFAEDLKDAR.K<br>R.LLIATGGWPHVDFPGEHAITSNEVFLHLETLPR.R<br>R.EGQAFADSVFGHPVTVDYANVPSAVSFHPPIGAVGMTEAEAR.N<br>K.KLLVYGAHFAEDLKDAR.K<br>K.IEKNDGTLTYLGGCEPIVADAVLVATGR.V<br>R.VAVAEHR.V<br>R.LLQISWTK.G<br>K.KLLVYGAHFAEDLKDAR.K<br>R.LLQIAETPDGLR.Y<br>R.LLQIAETPDGLR.Y<br>R.LPWEVDRWFHDAGNYVDSIDR.A<br>R.FLVIDPSQPAESR.R<br>R.AGGRQLQIDEALTGIAEGSR.L<br>R.AAALAEQLR.G<br>K.SSVADLAFENDIEALLAAR.D<br>R.IQEGVASLGGYADVFQK.N<br>R.AAAALGGGQK.R<br>K.VMDKAMLVGAPVIGLNDSSGAR.I<br>K.TVINEVVTQELGGATHTTK.S<br>K.LLFAYAEAVPK.I<br>R.NLLDEAFFR.G<br>R.FAASVVLPAVSGSLR.S<br>R.SLLQNAESSVEFMPVSHVAFLIK.N<br>R.TLASPANETCYR.F<br>K.NWGESHASIGSSFDPNKPPIAWLHYDDPR.K<br>K.IHEPFDLREQGVK.V<br>R.LNHGIATPSIADSVIFVR.D<br>R.IGAHGTLIFLHPK.D<br>K.DMGGVLTETMPK.G<br>K.VVDPLGGSYYEALTQELVDK.A<br>R.VDRGEDVIVGVNK.Y<br>R.QYAGSTAESNAFR.R<br>R.LKDEDLLETLEVDNTK.V<br>R.AAAAQSIETNLLAHAVEAAR.A<br>R.IISDFGYTSR.E<br>R.ATLGEISSAMEESFQR.Y<br>K.VIAGGVIPQDYQLR.D<br>K.GVAAAPYAGDRWQVLDGVK.A<br>R.YGVASGLDIDKFAGR.L<br>R.YGVASGLDIDK.F<br>R.TTIEAMAAMLGGSHTNALDEAIALPTDFSR.I<br>R.NTQIVIQEETGMTK.V<br>K.LLDTGIQNDILK.E<br>K.AMIEEAAAR.Q<br>K.AGVAIDTVEDMK.I<br>R.VMNLGAKDER.S<br>R.YATQPTPVK.G<br>R.NTYIYPPESMR.I<br>K.FNSISISGYHMQEAGATQVQELAFIADGAEYVR.Y<br>R.RAAAQSIETNLLAHAVEAAR.A<br>R.NLAAGQK.G<br>R.GYDSHPR.V<br>K.LLDTGIQNDILK.FEVMR.N<br>R.THCQTSVSLTEQDPYNNVIR.T |
| YP_616261 | Sala_1212 | GTP-binding protein Era                             | 16.50%            | 4                       |                                                                                                                                                                                                                                                                                                                                                                                                                                                                                                                                                                                                                                                                                                                                                                                                                                                                                                                                                                                                                                                                                                                                                                                                                                                                                                                                                                                                                                                                                                                                                                                                                                                                                                                                                                                                                                                                                                                                                                                                                                                                                                                                                                                                                                                                                                                                                                                                                                                                                                                                                                                                                                                                                                                                                                                                                                                                                                                                                                                                                                                                                                                                                                                                                                                                                                                                                                     |
| YP_616262 | Sala_1213 | Ribonuclease III                                    | 33.19%            | 6                       |                                                                                                                                                                                                                                                                                                                                                                                                                                                                                                                                                                                                                                                                                                                                                                                                                                                                                                                                                                                                                                                                                                                                                                                                                                                                                                                                                                                                                                                                                                                                                                                                                                                                                                                                                                                                                                                                                                                                                                                                                                                                                                                                                                                                                                                                                                                                                                                                                                                                                                                                                                                                                                                                                                                                                                                                                                                                                                                                                                                                                                                                                                                                                                                                                                                                                                                                                                     |
| YP_616263 | Sala_1214 | Peptidase S26A, signal peptidase I                  | 22.53%            | 6                       |                                                                                                                                                                                                                                                                                                                                                                                                                                                                                                                                                                                                                                                                                                                                                                                                                                                                                                                                                                                                                                                                                                                                                                                                                                                                                                                                                                                                                                                                                                                                                                                                                                                                                                                                                                                                                                                                                                                                                                                                                                                                                                                                                                                                                                                                                                                                                                                                                                                                                                                                                                                                                                                                                                                                                                                                                                                                                                                                                                                                                                                                                                                                                                                                                                                                                                                                                                     |
| YP_616264 | Sala_1215 | Glucose-6-phosphate isomerase                       | 72.65%            | 28                      |                                                                                                                                                                                                                                                                                                                                                                                                                                                                                                                                                                                                                                                                                                                                                                                                                                                                                                                                                                                                                                                                                                                                                                                                                                                                                                                                                                                                                                                                                                                                                                                                                                                                                                                                                                                                                                                                                                                                                                                                                                                                                                                                                                                                                                                                                                                                                                                                                                                                                                                                                                                                                                                                                                                                                                                                                                                                                                                                                                                                                                                                                                                                                                                                                                                                                                                                                                     |
| YP_616265 | Sala_1216 | glutathione reductase                               | 70.31%            | 20                      |                                                                                                                                                                                                                                                                                                                                                                                                                                                                                                                                                                                                                                                                                                                                                                                                                                                                                                                                                                                                                                                                                                                                                                                                                                                                                                                                                                                                                                                                                                                                                                                                                                                                                                                                                                                                                                                                                                                                                                                                                                                                                                                                                                                                                                                                                                                                                                                                                                                                                                                                                                                                                                                                                                                                                                                                                                                                                                                                                                                                                                                                                                                                                                                                                                                                                                                                                                     |
| YP_616266 | Sala_1217 | transcriptional regulator, XRE family               | 15.96%            | 6                       |                                                                                                                                                                                                                                                                                                                                                                                                                                                                                                                                                                                                                                                                                                                                                                                                                                                                                                                                                                                                                                                                                                                                                                                                                                                                                                                                                                                                                                                                                                                                                                                                                                                                                                                                                                                                                                                                                                                                                                                                                                                                                                                                                                                                                                                                                                                                                                                                                                                                                                                                                                                                                                                                                                                                                                                                                                                                                                                                                                                                                                                                                                                                                                                                                                                                                                                                                                     |
| -         | Sala_1218 | propionyl-CoA carboxylase, beta subunit             | 20.61%            | 6                       |                                                                                                                                                                                                                                                                                                                                                                                                                                                                                                                                                                                                                                                                                                                                                                                                                                                                                                                                                                                                                                                                                                                                                                                                                                                                                                                                                                                                                                                                                                                                                                                                                                                                                                                                                                                                                                                                                                                                                                                                                                                                                                                                                                                                                                                                                                                                                                                                                                                                                                                                                                                                                                                                                                                                                                                                                                                                                                                                                                                                                                                                                                                                                                                                                                                                                                                                                                     |
| YP_616267 | Sala_1219 | hypothetical protein                                | 52.38%            | 5                       |                                                                                                                                                                                                                                                                                                                                                                                                                                                                                                                                                                                                                                                                                                                                                                                                                                                                                                                                                                                                                                                                                                                                                                                                                                                                                                                                                                                                                                                                                                                                                                                                                                                                                                                                                                                                                                                                                                                                                                                                                                                                                                                                                                                                                                                                                                                                                                                                                                                                                                                                                                                                                                                                                                                                                                                                                                                                                                                                                                                                                                                                                                                                                                                                                                                                                                                                                                     |
| YP_616268 | Sala_1220 | Glyoxalase/bleomycin resistance protein/dioxygenase | 41.10%            | 4                       |                                                                                                                                                                                                                                                                                                                                                                                                                                                                                                                                                                                                                                                                                                                                                                                                                                                                                                                                                                                                                                                                                                                                                                                                                                                                                                                                                                                                                                                                                                                                                                                                                                                                                                                                                                                                                                                                                                                                                                                                                                                                                                                                                                                                                                                                                                                                                                                                                                                                                                                                                                                                                                                                                                                                                                                                                                                                                                                                                                                                                                                                                                                                                                                                                                                                                                                                                                     |
| YP_616269 | Sala_1221 | methylmalonyl-CoA mutase                            | 57.48%            | 30                      |                                                                                                                                                                                                                                                                                                                                                                                                                                                                                                                                                                                                                                                                                                                                                                                                                                                                                                                                                                                                                                                                                                                                                                                                                                                                                                                                                                                                                                                                                                                                                                                                                                                                                                                                                                                                                                                                                                                                                                                                                                                                                                                                                                                                                                                                                                                                                                                                                                                                                                                                                                                                                                                                                                                                                                                                                                                                                                                                                                                                                                                                                                                                                                                                                                                                                                                                                                     |



| Accession | Locus tag | Description                                           | Sequence coverage | No. peptides identified | List of peptides identified                                                                                                                                                                                                                                                                                                                                                                                                                                                                                                                                                                                                                                                                                                                                                                                                                                                                                                                                                                                                                                                                                                                                                                                                                                                                                                                                                                                                                                                                                                                                                                                                                                                                                                                                                                                                                                                                                                                                                                                                                                                                                                                                                                                                                                                                                                                                                                                                                                                                                                                                                                                                                                                                                                                                                                                                                                                                                                                                                                                                                                                                                                                                                                                                                                      |
|-----------|-----------|-------------------------------------------------------|-------------------|-------------------------|------------------------------------------------------------------------------------------------------------------------------------------------------------------------------------------------------------------------------------------------------------------------------------------------------------------------------------------------------------------------------------------------------------------------------------------------------------------------------------------------------------------------------------------------------------------------------------------------------------------------------------------------------------------------------------------------------------------------------------------------------------------------------------------------------------------------------------------------------------------------------------------------------------------------------------------------------------------------------------------------------------------------------------------------------------------------------------------------------------------------------------------------------------------------------------------------------------------------------------------------------------------------------------------------------------------------------------------------------------------------------------------------------------------------------------------------------------------------------------------------------------------------------------------------------------------------------------------------------------------------------------------------------------------------------------------------------------------------------------------------------------------------------------------------------------------------------------------------------------------------------------------------------------------------------------------------------------------------------------------------------------------------------------------------------------------------------------------------------------------------------------------------------------------------------------------------------------------------------------------------------------------------------------------------------------------------------------------------------------------------------------------------------------------------------------------------------------------------------------------------------------------------------------------------------------------------------------------------------------------------------------------------------------------------------------------------------------------------------------------------------------------------------------------------------------------------------------------------------------------------------------------------------------------------------------------------------------------------------------------------------------------------------------------------------------------------------------------------------------------------------------------------------------------------------------------------------------------------------------------------------------------|
|           |           |                                                       |                   |                         | K.GDFIADAATLEDIQASLYAEAR.E<br>K.DAGVQNAVPLFIPILSFFEK.E<br>K.ALDAFGEVPR.V<br>K.LLEPLVIRVTSSETVIGAA MSR.W<br>R.DVTDLAHAFSGEDR.F<br>K.VNQWAVVR.W<br>R.DVAGGNVAVIR.R<br>R.VLLDTGANK.A<br>K.GAPIIVEGPR.D<br>R.LIAPHQIVVPHLR.D<br>R.FVGWAEVQWARTGGALDR.I<br>R.LKALDAFGEVPR.V<br>R.FPGAATYSIEAMMQDGK.A<br>R.DRLYQESGK.L<br>R.YQDRDGGHSLCHTTSWGTR.M<br>R.PTGALDR.I<br>R.TSEFLWQEGHTAHADRDAMAETLR.A<br>R.SFAEDVLAMPVIAGEKPEPER.F<br>R.NTPLDAAPADSACIFFTGEPAVER.V<br>R.DLPLKVNQWAVVR.W<br>K.KGAPIIVEGPR.D<br>K.EMAVVTHHR.L<br>K.EADHYDGFAGE<br>R.IGEAISALER.R<br>K.VGEIVAAAR.I<br>K.HEIPHIFGDEVIDEAER.A<br>R.LVDANPVSGALR.F<br>R.ITGVQPFFFATVDLGLGCDGLVPVSTLGSER.F<br>R.AQTAYDAGAPDAGWDVLSALR.H<br>K.VGTVIIVJAGEGEDAGEAK.A<br>K.QFTAVINPPQAMIMAGAGEK.R<br>K.RPYVDDALAIATVMSATGSFDHR.A<br>R.RLAAEQIDILK.K<br>R.AIDGADGALLMK.T<br>K.ISTEMAELAGR.A<br>K.ATPAAAPAPVPAKVAPAEAGAAATVSAPPVAVLASAGTTNVGDR.I<br>K.TFKELVESPLGLVA.<br>K.DVAPAEAGAAATVSAPPVAVLASAGTTNVGDR.I<br>K.LSVNDMLIK.A<br>K.LRGEINASLESR.G<br>R.ADISVAVSIPGGLTIITDAGAK.S<br>R.GELNASLESR.G<br>K.RADISVAVSIPGGLTIITDAGAK.S<br>K.ELVESPLGLVA.<br>R.LAAEQIDILK.K<br>R.LAAEQIDILK.L<br>K.LQPHFYQGGTASISNMGMMGK.Q<br>K.KLTGTGPGGR.I<br>K.ATPAAAPAPVPAK.D<br>K.WLVKEGDEVK.S<br>K.ALAVALER.V<br>R.VPQCNSVFGGDVVR.F<br>R.RLAAEQIDILK.L<br>R.LSQSMQDAPHYLVDIR.L<br>R.AIDGADGALLMK.T<br>K.RPYVDDALAIATVMSATGSFDHR.A<br>R.VPQCNSVFGGDVVR.F<br>K.LTGTGPGGR.I<br>K.LSVNDMLIK.A<br>K.ISTEMAELAGR.A<br>R.LVPVEDADISAFLEK.Q<br>R.TNVGVWAIQDVTAPPWLAHK.A<br>R.SAEIHYMHAGAYGLK.A<br>K.TQSAEFSHAIVAIQVNTENIGLEALGVK.T<br>K.AIALGESEFGTK.T<br>R.TGELLGAMHIGAEVTELIQGYTIGK.T<br>R.HALVPEMPK.K<br>K.VGTFPFINGK.A<br>K.NIVATGAR.A<br>K.AKELGYEVK.V<br>K.AAEISADIDAVKR.S<br>K.GEKTETLSAK.N<br>K.TAELVEDDFIGTVFPHPTLSETMHEGVLAAFGR.P<br>K.KQGMTIHTGAGVEELK.T<br>K.QGMTIHTGAGVEELK.T<br>R.ELGICLNWGCIPK.A<br>K.QGMTIHTGAGVEELKTTANGVIAK.I<br>K.IIVHMGESK.L<br>K.AMHESIIVAEIAGNHPHAMDVR.N<br>R.GVASQLNK.G<br>R.ARDLPFAPADGK.R<br>K.TTANGVIAK.I<br>R.TGELLGAMHIGAEVTELIQGYTIGK.T<br>R.SRQVAVSGLNK.G<br>R.NIPGCTYCRPQIASVGLTEAK.A<br>R.GHIDTDAMCR.T<br>R.GHIDTDAMCR.T<br>K.TAELVEDDFIGTVFPHPTLSETMHEGVLAAFGRPLHI.<br>K.HKTIIVHMGESK.L<br>K.AAEISADIDAVKR.R<br>R.NTEPGQLQVPENELR.A<br>R.AAIAAGIDTIEHASLVVDEGR.M<br>R.NVSGDRNDIGLK.Q<br>R.GLEFTDSFWMGTAVK.N<br>K.TVEHPAIVGADGR.I<br>K.QAIDSGYATGPR.I<br>R.VWVEVGTPTQAIQATK.N<br>R.KQPWFAMDIYNTYQAEQSK.N<br>R.AIADEAHQWGLR.V<br>R.VAAHAHGAAGIR.A<br>K.NANDMLNAGFTTNR.N<br>K.DGKEEGIDSPDEL.R.Y<br>R.YADIVAVDGDPLANVR.E<br>K.DREIAQQR.D<br>R.YADIVAVDGDPLANVRELESVDVAVK.G<br>R.MVFASDAGVMPHGEVQK.Q<br>R.EKDVGAIVGR.Y<br>K.DVGAIAVGR.Y<br>R.ALMSVNPAYLDALATVR.R<br>R.SAHHEATDEDLAVLDR.L<br>R.LLGVHEDLMHDYLLTNTAGR.I<br>R.TGFAVAVHR.L<br>R.VLPLSGVHFR.D<br>R.IAQGAHHR.S<br>R.ALLIASPFSLR.G<br>R.VYVIEELLAAGAPVGAHWIADR.Q<br>R.YGSEEQCOR.Y<br>R.LDVGDLVPAADFEIAAAK.L<br>R.AVGVTISIAHQVHGAIQFTR.E<br>R.AVEAAAALAAAR.L<br>R.LLGLGPDVLDNFR.L<br>R.AAFTVGDGDVLAALGYDAGR.I<br>R.YSVTSNDTPR.A<br>K.FISIGSIEPQFYALLR.Q<br>R.ETFDIGGAIQAPAPR.Y<br>K.TGLDADPDFDAQHDPSK.W<br>R.GVTFPGEVYFFAR.I<br>K.AVTLRAEAFSR.A<br>R.TGIVVMTEDRDDSLFYR.F<br>R.LQALAFHDESIR.D<br>R.IAPGSLVFR.W<br>R.EALDALVLSQR.R<br>R.NNLDATVDDIIVSTSSQNGK.Q<br>R.ATALEAAAGVK.V<br>K.IDSATAAVTGGASGLGR.A<br>R.NTYFNQAVR.L<br>R.ESLEASVPPFK.R |
| YP_616279 | Sala_1231 | Ribonuclease R                                        | 13.19%            | 6                       |                                                                                                                                                                                                                                                                                                                                                                                                                                                                                                                                                                                                                                                                                                                                                                                                                                                                                                                                                                                                                                                                                                                                                                                                                                                                                                                                                                                                                                                                                                                                                                                                                                                                                                                                                                                                                                                                                                                                                                                                                                                                                                                                                                                                                                                                                                                                                                                                                                                                                                                                                                                                                                                                                                                                                                                                                                                                                                                                                                                                                                                                                                                                                                                                                                                                  |
| YP_616283 | Sala_1235 | Dihydropoamide acetyltransferase, long form           | 65.37%            | 31                      |                                                                                                                                                                                                                                                                                                                                                                                                                                                                                                                                                                                                                                                                                                                                                                                                                                                                                                                                                                                                                                                                                                                                                                                                                                                                                                                                                                                                                                                                                                                                                                                                                                                                                                                                                                                                                                                                                                                                                                                                                                                                                                                                                                                                                                                                                                                                                                                                                                                                                                                                                                                                                                                                                                                                                                                                                                                                                                                                                                                                                                                                                                                                                                                                                                                                  |
| YP_616285 | Sala_1237 | Dihydropoamide dehydrogenase                          | 78.28%            | 30                      |                                                                                                                                                                                                                                                                                                                                                                                                                                                                                                                                                                                                                                                                                                                                                                                                                                                                                                                                                                                                                                                                                                                                                                                                                                                                                                                                                                                                                                                                                                                                                                                                                                                                                                                                                                                                                                                                                                                                                                                                                                                                                                                                                                                                                                                                                                                                                                                                                                                                                                                                                                                                                                                                                                                                                                                                                                                                                                                                                                                                                                                                                                                                                                                                                                                                  |
| YP_616286 | Sala_1238 | amidohydrolase                                        | 55.63%            | 18                      |                                                                                                                                                                                                                                                                                                                                                                                                                                                                                                                                                                                                                                                                                                                                                                                                                                                                                                                                                                                                                                                                                                                                                                                                                                                                                                                                                                                                                                                                                                                                                                                                                                                                                                                                                                                                                                                                                                                                                                                                                                                                                                                                                                                                                                                                                                                                                                                                                                                                                                                                                                                                                                                                                                                                                                                                                                                                                                                                                                                                                                                                                                                                                                                                                                                                  |
| YP_616287 | Sala_1239 | protein tyrosine/serine phosphatase                   | 32.95%            | 6                       |                                                                                                                                                                                                                                                                                                                                                                                                                                                                                                                                                                                                                                                                                                                                                                                                                                                                                                                                                                                                                                                                                                                                                                                                                                                                                                                                                                                                                                                                                                                                                                                                                                                                                                                                                                                                                                                                                                                                                                                                                                                                                                                                                                                                                                                                                                                                                                                                                                                                                                                                                                                                                                                                                                                                                                                                                                                                                                                                                                                                                                                                                                                                                                                                                                                                  |
| YP_616288 | Sala_1240 | acyl-CoA dehydrogenase-like protein                   | 6.72%             | 3                       |                                                                                                                                                                                                                                                                                                                                                                                                                                                                                                                                                                                                                                                                                                                                                                                                                                                                                                                                                                                                                                                                                                                                                                                                                                                                                                                                                                                                                                                                                                                                                                                                                                                                                                                                                                                                                                                                                                                                                                                                                                                                                                                                                                                                                                                                                                                                                                                                                                                                                                                                                                                                                                                                                                                                                                                                                                                                                                                                                                                                                                                                                                                                                                                                                                                                  |
| YP_616289 | Sala_1241 | acyl-CoA dehydrogenase-like protein                   | 29.82%            | 3                       |                                                                                                                                                                                                                                                                                                                                                                                                                                                                                                                                                                                                                                                                                                                                                                                                                                                                                                                                                                                                                                                                                                                                                                                                                                                                                                                                                                                                                                                                                                                                                                                                                                                                                                                                                                                                                                                                                                                                                                                                                                                                                                                                                                                                                                                                                                                                                                                                                                                                                                                                                                                                                                                                                                                                                                                                                                                                                                                                                                                                                                                                                                                                                                                                                                                                  |
| YP_616290 | Sala_1242 | L-carnitine dehydratase/bile acid-inducible protein F | 25.53%            | 6                       |                                                                                                                                                                                                                                                                                                                                                                                                                                                                                                                                                                                                                                                                                                                                                                                                                                                                                                                                                                                                                                                                                                                                                                                                                                                                                                                                                                                                                                                                                                                                                                                                                                                                                                                                                                                                                                                                                                                                                                                                                                                                                                                                                                                                                                                                                                                                                                                                                                                                                                                                                                                                                                                                                                                                                                                                                                                                                                                                                                                                                                                                                                                                                                                                                                                                  |
| YP_616291 | Sala_1243 | protein of unknown function DUF839                    | 14.38%            | 5                       |                                                                                                                                                                                                                                                                                                                                                                                                                                                                                                                                                                                                                                                                                                                                                                                                                                                                                                                                                                                                                                                                                                                                                                                                                                                                                                                                                                                                                                                                                                                                                                                                                                                                                                                                                                                                                                                                                                                                                                                                                                                                                                                                                                                                                                                                                                                                                                                                                                                                                                                                                                                                                                                                                                                                                                                                                                                                                                                                                                                                                                                                                                                                                                                                                                                                  |
| YP_616292 | Sala_1244 | Acetyl-CoA C-acetyltransferase                        | 7.95%             | 2                       |                                                                                                                                                                                                                                                                                                                                                                                                                                                                                                                                                                                                                                                                                                                                                                                                                                                                                                                                                                                                                                                                                                                                                                                                                                                                                                                                                                                                                                                                                                                                                                                                                                                                                                                                                                                                                                                                                                                                                                                                                                                                                                                                                                                                                                                                                                                                                                                                                                                                                                                                                                                                                                                                                                                                                                                                                                                                                                                                                                                                                                                                                                                                                                                                                                                                  |
| YP_616293 | Sala_1245 | short-chain dehydrogenase/reductase SDR               | 24.23%            | 6                       |                                                                                                                                                                                                                                                                                                                                                                                                                                                                                                                                                                                                                                                                                                                                                                                                                                                                                                                                                                                                                                                                                                                                                                                                                                                                                                                                                                                                                                                                                                                                                                                                                                                                                                                                                                                                                                                                                                                                                                                                                                                                                                                                                                                                                                                                                                                                                                                                                                                                                                                                                                                                                                                                                                                                                                                                                                                                                                                                                                                                                                                                                                                                                                                                                                                                  |

| Accession | Locus tag | Description                                                            | Sequence coverage | No. peptides identified | List of peptides identified                                                                                                                                                                                                                                                                                                                                                                                                                                                                                                                                                                                                                                                                                                                                                                                                                                                                                                                                                                                                                                                                                                                                                                                                                                                                                                                                                                                                                                                                                                                                                                                                                                                                                                                                                                                                                                                                                                                                                                                                                                                                                                                                                                                                                                                                                                                                                                                                                                                                                                                                                                                                                                                                                                                                                                                                                                                                                                                                                                                                                                                                                                                                                                                                                                                                                                                                                            |
|-----------|-----------|------------------------------------------------------------------------|-------------------|-------------------------|----------------------------------------------------------------------------------------------------------------------------------------------------------------------------------------------------------------------------------------------------------------------------------------------------------------------------------------------------------------------------------------------------------------------------------------------------------------------------------------------------------------------------------------------------------------------------------------------------------------------------------------------------------------------------------------------------------------------------------------------------------------------------------------------------------------------------------------------------------------------------------------------------------------------------------------------------------------------------------------------------------------------------------------------------------------------------------------------------------------------------------------------------------------------------------------------------------------------------------------------------------------------------------------------------------------------------------------------------------------------------------------------------------------------------------------------------------------------------------------------------------------------------------------------------------------------------------------------------------------------------------------------------------------------------------------------------------------------------------------------------------------------------------------------------------------------------------------------------------------------------------------------------------------------------------------------------------------------------------------------------------------------------------------------------------------------------------------------------------------------------------------------------------------------------------------------------------------------------------------------------------------------------------------------------------------------------------------------------------------------------------------------------------------------------------------------------------------------------------------------------------------------------------------------------------------------------------------------------------------------------------------------------------------------------------------------------------------------------------------------------------------------------------------------------------------------------------------------------------------------------------------------------------------------------------------------------------------------------------------------------------------------------------------------------------------------------------------------------------------------------------------------------------------------------------------------------------------------------------------------------------------------------------------------------------------------------------------------------------------------------------------|
| YP_616295 | Sala_1247 | acyl-CoA dehydrogenase-like protein                                    | 13.46%            | 2                       | K.TLAYDKESGR.Y<br>.MKIDSATAAVVTGGASGLGR.A<br>R.WLPLGASGDTIGAVAFAGGDPPLPAVPLVLQDAGVR.G<br>R.LSATEAYDTAAR.D<br>R.AGQPVWVAVNVPATFDR.A<br>R.IWSSEADAIIESIGAYLR.N<br>R.VAEDGGDGGVAR.I<br>R.TAYLLTGNVYR.A<br>R.VVALDRNLGSPSPNTPIPAFAPYK.A<br>R.WPDDVQATLLEPDGGR.T<br>K.GSWGAFGYPQLFPLSVYLR.V<br>R.SLFEPELLATMVMVER.G<br>R.AAGLQPVSGRWPDDVQATLLEPDGGR.T<br>R.AILDYNCNRYALSVGLLADEIDR.<br>K.GASEPAPPVASSK.A<br>R.IGFASADAAQALATAR.S<br>R.SARPPVPAASQGVSDVPVIVGDSYK.V<br>R.LATPASTLAILR.T<br>K.VGDDVTPADVIDYDDVYASWYDEAAGK.A<br>R.VNDRGPMANQLIALSPAAMQLGLER.G<br>K.TLPLPSYEVETALDTR.G<br>K.VSADLITLADR.L<br>R.KWNSSTGSGTFLSPGK.L<br>R.AYQGGGGITDADILALHR.F<br>R.SEALLFAAR.A<br>R.FITLEGGEVGGK.S<br>R.VIIVDAVDLLESDGANALLK.T<br>R.PMLDMPEVRAIVAAAGGVGPK.A<br>R.LHHAUWLAGPQGMK.G<br>R.AAVALDRDDAAAR.L<br>R.VVLMTLFQAVR.T<br>R.TANADLANFSGNLAQR.S<br>R.LAASGFTVGGVPIFFPR.L<br>R.DFAALADADWFR.L<br>R.LSPGTPVEVWYVESWFFR.L<br>R.TSDPAHHAASQAIWK.A<br>R.DEAFYDESELTDDGEGIR.L<br>R.ATIDLANEMSGYFR.E<br>R.LVTGTDEHGLK.M<br>K.NLGGELSDYTPAQDDIDLFLVNLAK.D<br>R.FHTVWPAFLMSANLPLR.Q<br>R.LDLPPEEGEGE<br>R.FVEGKDLDSVR.T<br>R.EVSGQDGSYSAEAVR.T<br>K.SLGNVDPMLAER.F<br>R.TLAIARPVVPTAADNLLDQMIGAPDAR.D<br>R.AVFACNQYDAQAPWALR.K<br>R.YEGWYSRDEAFYDESELTDDGEGIR.L<br>R.QVFGHGLNLR.G<br>R.ATIDLANEMSGYFR.E<br>R.AFEQLAFVSGIEEWR.L<br>K.LNISYDMFMR.T<br>K.AEAQDEVELAR.A<br>R.LLVETDAPFLAPVPHR.G<br>R.VIGIGETGLDYYDKSDR.T<br>R.HIHAAQATGLPVIHMR.D<br>R.VIGIGETGLDYYDK.S<br>R.DAEADTLALLGEEMAR.A<br>K.NATDLQATK.W<br>R.EAGLDDLVDPAGPLVR.Q<br>R.QIDPEAAYALLR.G<br>R.IGFLPLVDAALPILAHEMFGAGR.E<br>R.AAALGTGAPLPGASSK.L<br>K.LEGGLDEPIGAGSVQGR.L<br>R.WDSNPFSEADAATASAVFRPDIYR.A<br>R.LAVPFLGLNGNAVTVSTR.L<br>R.GVGQIALATAQIWR.R<br>R.LLYGHTDAAHMIAPLAIATLGR.D<br>R.LTGLSDLFFDGR.A<br>R.ALHAAAQVMPDATVESADILARPEYLDAPR.D<br>R.AFPDQDQSYLAGLE<br>R.CLQDVPVQFQALR.V<br>R.AADGAQAGALAGVALSLPALLR.A<br>R.VGDFWPDIDGPR.E<br>R.AGGSLAGLSLGAQEAHWK.A<br>R.APVWPVIALVGTNAGK.S<br>R.AATLLGVQIEAIVPDIAR.G<br>R.RSLEDAR.R<br>R.RSDVAIISAATGEGVEAR.T<br>R.DIVHPDTDAQYEDVR.A<br>K.AILSDTVGVSDLPTELVAAR.A<br>K.ALQDVFNLAVR.R<br>K.HAISTVQPNPILNDTNGDDEAAEDS.<br>K.TPVFMFLVK.G<br>K.HAISTVMPSHDFDLSLGGNLR.D<br>R.DGQSQLVYK.H<br>K.NQNLQDIFNLARK.S<br>K.NQNLQDIFNLARK.K<br>K.HAISTVMPSHDFDLSLGGNLR.D<br>K.AGPAELTGNSAINNV.R.A<br>R.VLTDQSFTR.V<br>R.GGADILPSSSITTIPLK.E<br>R.TASDSDSALEAIR.Q<br>R.LDGLGLVEAIK.A<br>R.GAFDFIEKPEASR.L<br>R.RVPPPEISAEAMALQAHDPWGNVR.E<br>R.RPSLALIDVWLQCSR.L<br>R.VLITGAPGVK.E<br>R.LNVVPHIPLSR.E<br>R.IDADMLPAELVR.G<br>R.DLTVEIAEGR.F<br>R.ASVALADYNQLFDR.S<br>R.ALVAANEQLGAR.R<br>R.LDAGEDVVVR.R<br>R.LLSQAITNIVK.N<br>K.NSDATAVGSIR.A<br>R.VTPPERDDEISVLTR.A<br>R.SLNEAJIEIGRDGVAR.T<br>R.IAHEIKNLTPLQAAER.L<br>R.DTNVPGQSSAR.A<br>K.AVAQGDGFVLSFEDITQLLDQR.R<br>R.VLQSNESYTVGGSQLR.A<br>R.ATGIGSYDYLKPFDLDELTAASVR.A<br>R.RVEAASDAPPPADSHGLVGR.A<br>R.RSDJALVR.H<br>R.LAQLIEDPLHP<br>R.DNDESGVADPAALIAR.A<br>K.GVLDALAEFYPHLTR.A<br>R.TALAQSGADGVMIGR.G<br>R.LLALDGDADAIPVLPVPTLVEAADGAAGAVVAR.D<br>R.SLQSVATVEGDR.L<br>R.QQSVANALSALTDWPDVAVLVHDAARPGVDSAVDR.L<br>R.GAASHHFLSFAGER.V<br>R.AHAESGAATDDAQLVR.S<br>R.LIARDLAAASVLAQNR.A<br>R.DDLAASVLAQNR.A<br>R.HAATLFALELLQPEK.D<br>K.KPVGUVVFR.A<br>R.ALKRGQDDYFTQR.I<br>R.GQDPPDYFTQR.I<br>R.IQFESTDR.G<br>K.DALRPSDVALPAP<br>R.ADELVAGSATSSEGR.S<br>R.DLPSAEQMFALVTDIAR.Y<br>R.YPEFLPWIARL.I<br>R.MFEALAGQMFDAK.A<br>R.IRSDSEHESVADMIVGFK.G |
| YP_616301 | Sala_1254 | Lytic murein transglycosylase                                          | 47.74%            | 10                      |                                                                                                                                                                                                                                                                                                                                                                                                                                                                                                                                                                                                                                                                                                                                                                                                                                                                                                                                                                                                                                                                                                                                                                                                                                                                                                                                                                                                                                                                                                                                                                                                                                                                                                                                                                                                                                                                                                                                                                                                                                                                                                                                                                                                                                                                                                                                                                                                                                                                                                                                                                                                                                                                                                                                                                                                                                                                                                                                                                                                                                                                                                                                                                                                                                                                                                                                                                                        |
| YP_616302 | Sala_1255 | rare lipoprotein A                                                     | 45.00%            | 7                       |                                                                                                                                                                                                                                                                                                                                                                                                                                                                                                                                                                                                                                                                                                                                                                                                                                                                                                                                                                                                                                                                                                                                                                                                                                                                                                                                                                                                                                                                                                                                                                                                                                                                                                                                                                                                                                                                                                                                                                                                                                                                                                                                                                                                                                                                                                                                                                                                                                                                                                                                                                                                                                                                                                                                                                                                                                                                                                                                                                                                                                                                                                                                                                                                                                                                                                                                                                                        |
| YP_616303 | Sala_1256 | Serine-type D-Ala-D-Ala carboxypeptidase                               | 10.99%            | 2                       |                                                                                                                                                                                                                                                                                                                                                                                                                                                                                                                                                                                                                                                                                                                                                                                                                                                                                                                                                                                                                                                                                                                                                                                                                                                                                                                                                                                                                                                                                                                                                                                                                                                                                                                                                                                                                                                                                                                                                                                                                                                                                                                                                                                                                                                                                                                                                                                                                                                                                                                                                                                                                                                                                                                                                                                                                                                                                                                                                                                                                                                                                                                                                                                                                                                                                                                                                                                        |
| YP_616304 | Sala_1257 | Thymidylate kinase                                                     | 19.81%            | 3                       |                                                                                                                                                                                                                                                                                                                                                                                                                                                                                                                                                                                                                                                                                                                                                                                                                                                                                                                                                                                                                                                                                                                                                                                                                                                                                                                                                                                                                                                                                                                                                                                                                                                                                                                                                                                                                                                                                                                                                                                                                                                                                                                                                                                                                                                                                                                                                                                                                                                                                                                                                                                                                                                                                                                                                                                                                                                                                                                                                                                                                                                                                                                                                                                                                                                                                                                                                                                        |
| YP_616305 | Sala_1258 | DNA-directed DNA polymerase                                            | 21.78%            | 4                       |                                                                                                                                                                                                                                                                                                                                                                                                                                                                                                                                                                                                                                                                                                                                                                                                                                                                                                                                                                                                                                                                                                                                                                                                                                                                                                                                                                                                                                                                                                                                                                                                                                                                                                                                                                                                                                                                                                                                                                                                                                                                                                                                                                                                                                                                                                                                                                                                                                                                                                                                                                                                                                                                                                                                                                                                                                                                                                                                                                                                                                                                                                                                                                                                                                                                                                                                                                                        |
| YP_616306 | Sala_1259 | methionyl-tRNA synthetase                                              | 62.24%            | 23                      |                                                                                                                                                                                                                                                                                                                                                                                                                                                                                                                                                                                                                                                                                                                                                                                                                                                                                                                                                                                                                                                                                                                                                                                                                                                                                                                                                                                                                                                                                                                                                                                                                                                                                                                                                                                                                                                                                                                                                                                                                                                                                                                                                                                                                                                                                                                                                                                                                                                                                                                                                                                                                                                                                                                                                                                                                                                                                                                                                                                                                                                                                                                                                                                                                                                                                                                                                                                        |
| YP_616307 | Sala_1260 | TatD-related deoxyribonuclease                                         | 34.50%            | 7                       |                                                                                                                                                                                                                                                                                                                                                                                                                                                                                                                                                                                                                                                                                                                                                                                                                                                                                                                                                                                                                                                                                                                                                                                                                                                                                                                                                                                                                                                                                                                                                                                                                                                                                                                                                                                                                                                                                                                                                                                                                                                                                                                                                                                                                                                                                                                                                                                                                                                                                                                                                                                                                                                                                                                                                                                                                                                                                                                                                                                                                                                                                                                                                                                                                                                                                                                                                                                        |
| YP_616309 | Sala_1262 | response regulator receiver and ANTAG domain protein                   | 15.54%            | 2                       |                                                                                                                                                                                                                                                                                                                                                                                                                                                                                                                                                                                                                                                                                                                                                                                                                                                                                                                                                                                                                                                                                                                                                                                                                                                                                                                                                                                                                                                                                                                                                                                                                                                                                                                                                                                                                                                                                                                                                                                                                                                                                                                                                                                                                                                                                                                                                                                                                                                                                                                                                                                                                                                                                                                                                                                                                                                                                                                                                                                                                                                                                                                                                                                                                                                                                                                                                                                        |
| YP_616310 | Sala_1263 | nitrate transporter component, nrtA                                    | 51.61%            | 11                      |                                                                                                                                                                                                                                                                                                                                                                                                                                                                                                                                                                                                                                                                                                                                                                                                                                                                                                                                                                                                                                                                                                                                                                                                                                                                                                                                                                                                                                                                                                                                                                                                                                                                                                                                                                                                                                                                                                                                                                                                                                                                                                                                                                                                                                                                                                                                                                                                                                                                                                                                                                                                                                                                                                                                                                                                                                                                                                                                                                                                                                                                                                                                                                                                                                                                                                                                                                                        |
| YP_616317 | Sala_1270 | MazG family protein                                                    | 19.84%            | 3                       |                                                                                                                                                                                                                                                                                                                                                                                                                                                                                                                                                                                                                                                                                                                                                                                                                                                                                                                                                                                                                                                                                                                                                                                                                                                                                                                                                                                                                                                                                                                                                                                                                                                                                                                                                                                                                                                                                                                                                                                                                                                                                                                                                                                                                                                                                                                                                                                                                                                                                                                                                                                                                                                                                                                                                                                                                                                                                                                                                                                                                                                                                                                                                                                                                                                                                                                                                                                        |
| YP_616318 | Sala_1271 | GTP-binding protein, HSR1-related                                      | 22.92%            | 6                       |                                                                                                                                                                                                                                                                                                                                                                                                                                                                                                                                                                                                                                                                                                                                                                                                                                                                                                                                                                                                                                                                                                                                                                                                                                                                                                                                                                                                                                                                                                                                                                                                                                                                                                                                                                                                                                                                                                                                                                                                                                                                                                                                                                                                                                                                                                                                                                                                                                                                                                                                                                                                                                                                                                                                                                                                                                                                                                                                                                                                                                                                                                                                                                                                                                                                                                                                                                                        |
| YP_616319 | Sala_1272 | Host factor Hfq                                                        | 46.43%            | 8                       |                                                                                                                                                                                                                                                                                                                                                                                                                                                                                                                                                                                                                                                                                                                                                                                                                                                                                                                                                                                                                                                                                                                                                                                                                                                                                                                                                                                                                                                                                                                                                                                                                                                                                                                                                                                                                                                                                                                                                                                                                                                                                                                                                                                                                                                                                                                                                                                                                                                                                                                                                                                                                                                                                                                                                                                                                                                                                                                                                                                                                                                                                                                                                                                                                                                                                                                                                                                        |
| YP_616320 | Sala_1273 | two component, sigma54 specific, transcriptional regulator, Fis family | 36.44%            | 12                      |                                                                                                                                                                                                                                                                                                                                                                                                                                                                                                                                                                                                                                                                                                                                                                                                                                                                                                                                                                                                                                                                                                                                                                                                                                                                                                                                                                                                                                                                                                                                                                                                                                                                                                                                                                                                                                                                                                                                                                                                                                                                                                                                                                                                                                                                                                                                                                                                                                                                                                                                                                                                                                                                                                                                                                                                                                                                                                                                                                                                                                                                                                                                                                                                                                                                                                                                                                                        |
| YP_616321 | Sala_1274 | multi-sensor signal transduction histidine kinase                      | 18.63%            | 10                      |                                                                                                                                                                                                                                                                                                                                                                                                                                                                                                                                                                                                                                                                                                                                                                                                                                                                                                                                                                                                                                                                                                                                                                                                                                                                                                                                                                                                                                                                                                                                                                                                                                                                                                                                                                                                                                                                                                                                                                                                                                                                                                                                                                                                                                                                                                                                                                                                                                                                                                                                                                                                                                                                                                                                                                                                                                                                                                                                                                                                                                                                                                                                                                                                                                                                                                                                                                                        |
| YP_616322 | Sala_1275 | two component, sigma54 specific, transcriptional regulator, Fis family | 20.97%            | 6                       |                                                                                                                                                                                                                                                                                                                                                                                                                                                                                                                                                                                                                                                                                                                                                                                                                                                                                                                                                                                                                                                                                                                                                                                                                                                                                                                                                                                                                                                                                                                                                                                                                                                                                                                                                                                                                                                                                                                                                                                                                                                                                                                                                                                                                                                                                                                                                                                                                                                                                                                                                                                                                                                                                                                                                                                                                                                                                                                                                                                                                                                                                                                                                                                                                                                                                                                                                                                        |
| YP_616324 | Sala_1277 | Dihydrouridine synthase TIM-barrel protein nifR3                       | 9.34%             | 2                       |                                                                                                                                                                                                                                                                                                                                                                                                                                                                                                                                                                                                                                                                                                                                                                                                                                                                                                                                                                                                                                                                                                                                                                                                                                                                                                                                                                                                                                                                                                                                                                                                                                                                                                                                                                                                                                                                                                                                                                                                                                                                                                                                                                                                                                                                                                                                                                                                                                                                                                                                                                                                                                                                                                                                                                                                                                                                                                                                                                                                                                                                                                                                                                                                                                                                                                                                                                                        |
| YP_616325 | Sala_1278 | 2-C-methyl-D-erythritol 4-phosphate cytidylyltransferase               | 30.10%            | 5                       |                                                                                                                                                                                                                                                                                                                                                                                                                                                                                                                                                                                                                                                                                                                                                                                                                                                                                                                                                                                                                                                                                                                                                                                                                                                                                                                                                                                                                                                                                                                                                                                                                                                                                                                                                                                                                                                                                                                                                                                                                                                                                                                                                                                                                                                                                                                                                                                                                                                                                                                                                                                                                                                                                                                                                                                                                                                                                                                                                                                                                                                                                                                                                                                                                                                                                                                                                                                        |
| YP_616326 | Sala_1279 | CinA-like protein                                                      | 41.62%            | 8                       |                                                                                                                                                                                                                                                                                                                                                                                                                                                                                                                                                                                                                                                                                                                                                                                                                                                                                                                                                                                                                                                                                                                                                                                                                                                                                                                                                                                                                                                                                                                                                                                                                                                                                                                                                                                                                                                                                                                                                                                                                                                                                                                                                                                                                                                                                                                                                                                                                                                                                                                                                                                                                                                                                                                                                                                                                                                                                                                                                                                                                                                                                                                                                                                                                                                                                                                                                                                        |
| YP_616327 | Sala_1280 | cyclase/dehydrase                                                      | 47.80%            | 5                       |                                                                                                                                                                                                                                                                                                                                                                                                                                                                                                                                                                                                                                                                                                                                                                                                                                                                                                                                                                                                                                                                                                                                                                                                                                                                                                                                                                                                                                                                                                                                                                                                                                                                                                                                                                                                                                                                                                                                                                                                                                                                                                                                                                                                                                                                                                                                                                                                                                                                                                                                                                                                                                                                                                                                                                                                                                                                                                                                                                                                                                                                                                                                                                                                                                                                                                                                                                                        |

| Accession | Locus tag | Description                                    | Sequence coverage | No. peptides identified | List of peptides identified                                                                                                                                                                                                                                                                                                                                                                                                                                                                                                                                                                                                                                                                                                                                                                                                                                                                                                                                                                                                                                                                                                                                                                                                                                                                                                                                                                                                                                                                                                                                                                                                                                                                                                                                                                                                                                                                                                                                                                                                                                                                                                                                                                                                                                                                                                                                                                                                                                                                                                                                                                                               |
|-----------|-----------|------------------------------------------------|-------------------|-------------------------|---------------------------------------------------------------------------------------------------------------------------------------------------------------------------------------------------------------------------------------------------------------------------------------------------------------------------------------------------------------------------------------------------------------------------------------------------------------------------------------------------------------------------------------------------------------------------------------------------------------------------------------------------------------------------------------------------------------------------------------------------------------------------------------------------------------------------------------------------------------------------------------------------------------------------------------------------------------------------------------------------------------------------------------------------------------------------------------------------------------------------------------------------------------------------------------------------------------------------------------------------------------------------------------------------------------------------------------------------------------------------------------------------------------------------------------------------------------------------------------------------------------------------------------------------------------------------------------------------------------------------------------------------------------------------------------------------------------------------------------------------------------------------------------------------------------------------------------------------------------------------------------------------------------------------------------------------------------------------------------------------------------------------------------------------------------------------------------------------------------------------------------------------------------------------------------------------------------------------------------------------------------------------------------------------------------------------------------------------------------------------------------------------------------------------------------------------------------------------------------------------------------------------------------------------------------------------------------------------------------------------|
| YP_616328 | Sala_1281 | lipoic acid synthetase                         | 40.51%            | 9                       | K.VIDFVTPQAFDAYAQIAR.A<br>R.ETPQTIIETLTPDFR.N<br>K.MGLSHVITSVDRDLDPDGGASQFVK.V<br>K.GFLQVASSPTR.S<br>R.VKAPTSRGAETR.K<br>K.APTSPGYAETR.K<br>R.SADIDFMTMGYQLQTPK.H<br>K.SGIMLGLGEER.M                                                                                                                                                                                                                                                                                                                                                                                                                                                                                                                                                                                                                                                                                                                                                                                                                                                                                                                                                                                                                                                                                                                                                                                                                                                                                                                                                                                                                                                                                                                                                                                                                                                                                                                                                                                                                                                                                                                                                                                                                                                                                                                                                                                                                                                                                                                                                                                                                                      |
| YP_616329 | Sala_1282 | Carbonate dehydratase                          | 66.20%            | 11                      | R.SSYHAGDDFHEHR.A<br>R.VFSGQIFDTSRGEIWR.N<br>R.DRWNELAEGQSPK.V<br>R.NVAALVPPFETTPGR.H<br>R.GAFFAISDGLHLVDDASGEFRPAT.<br>R.GGFIADWIALDDASDEVR.A<br>R.WNELAEGQSPK.V<br>R.HVSAALFAVQFLK.V<br>R.NGGWQEQR.D<br>R.AGHSOLDSDR.D<br>K.VMVIACSDSR.V<br>K.SMEGAEPGR.G                                                                                                                                                                                                                                                                                                                                                                                                                                                                                                                                                                                                                                                                                                                                                                                                                                                                                                                                                                                                                                                                                                                                                                                                                                                                                                                                                                                                                                                                                                                                                                                                                                                                                                                                                                                                                                                                                                                                                                                                                                                                                                                                                                                                                                                                                                                                                               |
| YP_616331 | Sala_1284 | ABC transporter related                        | 61.04%            | 34                      | K.LITGQEQPDSGSISIGDTVR.L<br>K.SFDQLVEAQENR.A<br>R.LGEGATPHATTYK.K<br>K.IDAVDGTLDNQLIAMEALR.C<br>R.LLLEKPSILLDEPTNHLDAESVAWLEK.H<br>K.AQIVIQVPER.L<br>K.AIKDELEWIR.Q<br>R.YFYEGNYSTYLEK.K<br>K.TYFGAQKFTLNLSLQYYPDAK.I<br>R.AYVGFANFK.G<br>K.SFDQLVEAQENRAGK.A<br>K.HLVDYPGNVILVTHDR.Y<br>R.LGYVDQSR.D<br>K.VGQLSGGER.N<br>K.LLFEDLSFTLPPGGIVGVIGPNGAGK.S<br>K.IGIVGPNGTGK.S<br>K.RLEQEAR.E<br>K.IMGGIDKDFTEAWPGDITVGYLAQEPQLDPTK.T<br>K.AYGDKLLFEDLSFTLPPGGIVGVIGPNGAGK.S<br>K.VIEVNNISK.A<br>K.KVYQLSGGER.N<br>R.FNEISALMADPPADAFDALMEEMGLQEK.I<br>R.DALDPKNVWEEISGGHDMMSIGK.H<br>K.PSILLDEPTNHLDAESVAWLEK.H<br>R.YFLDNVNWILELDR.G<br>R.LATHILAFEGNSHVEWEGNFEAYEEDKIR.R<br>R.LGEGATPHATTYK.L<br>R.LATHILAFEGNSHVEWEGNFEAYEEDK.I<br>R.CPPGDWVSVENLSSGGEK.R<br>K.IDAVDGTLDNQLIAMEALR.C<br>K.DFTGEAWPGDITVGYLAQEPQLDPTK.T<br>R.YFYEGNYSTYLEK.K<br>R.IKSFQQLVEAQENRAGK.A<br>R.IKSFQQLVEAQENR.A<br>R.TAADLDQFYR.W<br>R.NSYTGNLPLVALQR.A<br>R.AAVRPTLVWVPIADER.A<br>R.GAVIGLSIAHAAFGGEPEGADAAAAGAFR.Q<br>R.FATATDLLDPGSPFEGEPAAVLSLGSFLR.L<br>R.FAPLVAFYANDVPAVSAAMLR.D<br>R.DLQSFQSFHTAHTSAPNVTSVK.T<br>K.AFEDVYVGLPEVR.E<br>R.SQAEADLKAFEDYVGGLEPEVR.E<br>R.VRALEEAGVIR.S<br>R.SYHADLDAK.L<br>R.ALEEAQVIR.S<br>R.LGVAQALAGQDAAAASFAK.I<br>R.STADVLVIGGQPAK.A<br>R.AAADAABAADANK.A<br>K.GDTHFGNILETQTPR.A<br>R.LAQLWAVR.A<br>K.AAPNDIAIQFR.L<br>K.AAGSTEPALAILMDSYLNAGQIDQGWAIK.A<br>R.NTLYLLQQSGGDKELNLDILR.L<br>R.VEDYPSPATWR.N<br>R.TNEMLDVLTMR.V<br>R.AKTGAAPPATAS.<br>K.DTALQQGLDGMIDSLTPPENLATNYFSGNFAYGAK.N<br>K.TGAAPPATAS.<br>K.DAAALQAAMAEQASATSPDDQYLLSFLYQLGILNK.D<br>K.KMTDATAK.D<br>R.TNEMLDVLTMRVEDYPSPATWR.N<br>R.TNEMLDVLTMR.V<br>R.AAGTKPSIEDLYRPAQAFQK.A<br>R.AAADAABAADANKAATLNNPK.A<br>K.AIPLYEALK.A<br>R.NTLYLLQQSGGDK.E<br>K.AATLNNPK.A<br>R.RAMADTLAALSQSEIWR.Q<br>R.LAESSDKLSNAVIANHDQLAR.S<br>R.LAALGEEAAR.T<br>R.ATADSAANQAR.L<br>R.AVAANSAADR.L<br>R.LNASFAEAEASLAK.L<br>R.EAGLVAHQQGANLEAR.L<br>K.ILRDGAEPFSCGGAR.H<br>R.VSEAEQAIAASDRDLTAK.Q<br>R.SNEEQMTQQAANQALADR.L<br>R.MIATLAEVTRATADSAANQAR.L<br>R.IAAHVAEVKQ.Q<br>R.EAGDAIGAQLSEHADASDALAGR.I<br>R.DGAEPFSCGGAR.M<br>R.AMADTLAALSQSEIWR.Q<br>K.LYVALAQIDRL.L<br>R.VVVTTFASNAAR.L<br>R.FALETGVPDVLQENGDLVR.L<br>R.EAAEQATGPARDEEK.L<br>K.NFVDSAISYR.G<br>R.EAAEQATGPAR.D<br>R.MVPLASHILEMSAVVIDTPYGR.V<br>R.LILDGDVILPADGETMSER.R<br>R.LATLGEVAR.A<br>R.EGLEQAVGAAG.G<br>K.LEAGDTVVFSSK.Q<br>R.SVGLTDIPPTVDFDEAMR.L<br>R.LVVPVHGEIR.H<br>R.LAPGAAQIVR.V<br>R.DKVMVATGGQGEPR.A<br>R.GVPEDEREAFIDEMR.E<br>R.FTAGLIAHK.L<br>K.VMVATGGQGEPR.A<br>K.LAEGLLEGEVEIK.V<br>R.RIATDWTGK.K<br>K.KPVVDVMLVEI.<br>K.DLLGILLTHGHEDHGAIPYLAADLGVPLYANR.F |
| YP_616333 | Sala_1286 | glycosyl transferase, group 1                  | 12.06%            | 3                       | R.LATHILAFEGNSHVEWEGNFEAYEEDKIR.R<br>R.LGEGATPHATTYK.L<br>R.LATHILAFEGNSHVEWEGNFEAYEEDK.I<br>R.CPPGDWVSVENLSSGGEK.R<br>K.IDAVDGTLDNQLIAMEALR.C<br>K.DFTGEAWPGDITVGYLAQEPQLDPTK.T<br>R.YFYEGNYSTYLEK.K<br>R.IKSFQQLVEAQENRAGK.A<br>R.IKSFQQLVEAQENR.A<br>R.TAADLDQFYR.W<br>R.NSYTGNLPLVALQR.A<br>R.AAVRPTLVWVPIADER.A                                                                                                                                                                                                                                                                                                                                                                                                                                                                                                                                                                                                                                                                                                                                                                                                                                                                                                                                                                                                                                                                                                                                                                                                                                                                                                                                                                                                                                                                                                                                                                                                                                                                                                                                                                                                                                                                                                                                                                                                                                                                                                                                                                                                                                                                                                      |
| YP_616334 | Sala_1287 | histidine kinase A-like protein                | 14.81%            | 3                       | R.GAVIGLSIAHAAFGGEPEGADAAAAGAFR.Q<br>R.FATATDLLDPGSPFEGEPAAVLSLGSFLR.L<br>R.FAPLVAFYANDVPAVSAAMLR.D<br>R.DLQSFQSFHTAHTSAPNVTSVK.T<br>K.AFEDVYVGLPEVR.E<br>R.SQAEADLKAFEDYVGGLEPEVR.E<br>R.VRALEEAGVIR.S<br>R.SYHADLDAK.L<br>R.ALEEAQVIR.S                                                                                                                                                                                                                                                                                                                                                                                                                                                                                                                                                                                                                                                                                                                                                                                                                                                                                                                                                                                                                                                                                                                                                                                                                                                                                                                                                                                                                                                                                                                                                                                                                                                                                                                                                                                                                                                                                                                                                                                                                                                                                                                                                                                                                                                                                                                                                                                 |
| YP_616335 | Sala_1288 | transcriptional regulator, AsnC family         | 41.40%            | 6                       | R.LGVAQALAGQDAAAASFAK.I<br>R.STADVLVIGGQPAK.A<br>R.AAADAABAADANK.A<br>K.GDTHFGNILETQTPR.A<br>R.LAQLWAVR.A<br>K.AAPNDIAIQFR.L<br>K.AAGSTEPALAILMDSYLNAGQIDQGWAIK.A<br>R.NTLYLLQQSGGDKELNLDILR.L<br>R.VEDYPSPATWR.N<br>R.TNEMLDVLTMR.V<br>R.AKTGAAPPATAS.<br>K.DTALQQGLDGMIDSLTPPENLATNYFSGNFAYGAK.N<br>K.TGAAPPATAS.<br>K.DAAALQAAMAEQASATSPDDQYLLSFLYQLGILNK.D<br>K.KMTDATAK.D<br>R.TNEMLDVLTMRVEDYPSPATWR.N<br>R.TNEMLDVLTMR.V<br>R.AAGTKPSIEDLYRPAQAFQK.A<br>R.AAADAABAADANKAATLNNPK.A<br>K.AIPLYEALK.A<br>R.NTLYLLQQSGGDK.E                                                                                                                                                                                                                                                                                                                                                                                                                                                                                                                                                                                                                                                                                                                                                                                                                                                                                                                                                                                                                                                                                                                                                                                                                                                                                                                                                                                                                                                                                                                                                                                                                                                                                                                                                                                                                                                                                                                                                                                                                                                                                            |
| YP_616336 | Sala_1289 | Tetratricopeptide TPR_2                        | 68.54%            | 22                      | R.RAMADTLAALSQSEIWR.Q<br>R.LAESSDKLSNAVIANHDQLAR.S<br>R.LAALGEEAAR.T<br>R.ATADSAANQAR.L<br>R.AVAANSAADR.L<br>R.LNASFAEAEASLAK.L<br>R.EAGLVAHQQGANLEAR.L<br>K.ILRDGAEPFSCGGAR.H<br>R.VSEAEQAIAASDRDLTAK.Q<br>R.SNEEQMTQQAANQALADR.L<br>R.MIATLAEVTRATADSAANQAR.L<br>R.IAAHVAEVKQ.Q<br>R.EAGDAIGAQLSEHADASDALAGR.I<br>R.DGAEPFSCGGAR.M<br>R.AMADTLAALSQSEIWR.Q<br>K.LYVALAQIDRL.L<br>R.VVVTTFASNAAR.L<br>R.FALETGVPDVLQENGDLVR.L<br>R.EAAEQATGPARDEEK.L<br>K.NFVDSAISYR.G<br>R.EAAEQATGPAR.D<br>R.MVPLASHILEMSAVVIDTPYGR.V<br>R.LILDGDVILPADGETMSER.R<br>R.LATLGEVAR.A<br>R.EGLEQAVGAAG.G<br>K.LEAGDTVVFSSK.Q<br>R.SVGLTDIPPTVDFDEAMR.L<br>R.LVVPVHGEIR.H<br>R.LAPGAAQIVR.V<br>R.DKVMVATGGQGEPR.A<br>R.GVPEDEREAFIDEMR.E<br>R.FTAGLIAHK.L<br>K.VMVATGGQGEPR.A<br>K.LAEGLLEGEVEIK.V<br>R.RIATDWTGK.K<br>K.KPVVDVMLVEI.<br>K.DLLGILLTHGHEDHGAIPYLAADLGVPLYANR.F                                                                                                                                                                                                                                                                                                                                                                                                                                                                                                                                                                                                                                                                                                                                                                                                                                                                                                                                                                                                                                                                                                                                                                                                                                                                                                                                                                                                                                                                                                                                                                                                                                                                                                                                                               |
| YP_616338 | Sala_1291 | hypothetical protein                           | 26.68%            | 16                      | R.RAMADTLAALSQSEIWR.Q<br>R.LAESSDKLSNAVIANHDQLAR.S<br>R.LAALGEEAAR.T<br>R.ATADSAANQAR.L<br>R.AVAANSAADR.L<br>R.LNASFAEAEASLAK.L<br>R.EAGLVAHQQGANLEAR.L<br>K.ILRDGAEPFSCGGAR.H<br>R.VSEAEQAIAASDRDLTAK.Q<br>R.SNEEQMTQQAANQALADR.L<br>R.MIATLAEVTRATADSAANQAR.L<br>R.IAAHVAEVKQ.Q<br>R.EAGDAIGAQLSEHADASDALAGR.I<br>R.DGAEPFSCGGAR.M<br>R.AMADTLAALSQSEIWR.Q<br>K.LYVALAQIDRL.L<br>R.VVVTTFASNAAR.L<br>R.FALETGVPDVLQENGDLVR.L<br>R.EAAEQATGPARDEEK.L<br>K.NFVDSAISYR.G<br>R.EAAEQATGPAR.D<br>R.MVPLASHILEMSAVVIDTPYGR.V<br>R.LILDGDVILPADGETMSER.R<br>R.LATLGEVAR.A<br>R.EGLEQAVGAAG.G<br>K.LEAGDTVVFSSK.Q<br>R.SVGLTDIPPTVDFDEAMR.L<br>R.LVVPVHGEIR.H<br>R.LAPGAAQIVR.V<br>R.DKVMVATGGQGEPR.A<br>R.GVPEDEREAFIDEMR.E<br>R.FTAGLIAHK.L<br>K.VMVATGGQGEPR.A<br>K.LAEGLLEGEVEIK.V<br>R.RIATDWTGK.K<br>K.KPVVDVMLVEI.<br>K.DLLGILLTHGHEDHGAIPYLAADLGVPLYANR.F                                                                                                                                                                                                                                                                                                                                                                                                                                                                                                                                                                                                                                                                                                                                                                                                                                                                                                                                                                                                                                                                                                                                                                                                                                                                                                                                                                                                                                                                                                                                                                                                                                                                                                                                                               |
| YP_616340 | Sala_1293 | beta-lactamase-like protein                    | 50.92%            | 21                      | R.RAMADTLAALSQSEIWR.Q<br>R.LAESSDKLSNAVIANHDQLAR.S<br>R.LAALGEEAAR.T<br>R.ATADSAANQAR.L<br>R.AVAANSAADR.L<br>R.LNASFAEAEASLAK.L<br>R.EAGLVAHQQGANLEAR.L<br>K.ILRDGAEPFSCGGAR.H<br>R.VSEAEQAIAASDRDLTAK.Q<br>R.SNEEQMTQQAANQALADR.L<br>R.MIATLAEVTRATADSAANQAR.L<br>R.IAAHVAEVKQ.Q<br>R.EAGDAIGAQLSEHADASDALAGR.I<br>R.DGAEPFSCGGAR.M<br>R.AMADTLAALSQSEIWR.Q<br>K.LYVALAQIDRL.L<br>R.VVVTTFASNAAR.L<br>R.FALETGVPDVLQENGDLVR.L<br>R.EAAEQATGPARDEEK.L<br>K.NFVDSAISYR.G<br>R.EAAEQATGPAR.D<br>R.MVPLASHILEMSAVVIDTPYGR.V<br>R.LILDGDVILPADGETMSER.R<br>R.LATLGEVAR.A<br>R.EGLEQAVGAAG.G<br>K.LEAGDTVVFSSK.Q<br>R.SVGLTDIPPTVDFDEAMR.L<br>R.LVVPVHGEIR.H<br>R.LAPGAAQIVR.V<br>R.DKVMVATGGQGEPR.A<br>R.GVPEDEREAFIDEMR.E<br>R.FTAGLIAHK.L<br>K.VMVATGGQGEPR.A<br>K.LAEGLLEGEVEIK.V<br>R.RIATDWTGK.K<br>K.KPVVDVMLVEI.<br>K.DLLGILLTHGHEDHGAIPYLAADLGVPLYANR.F                                                                                                                                                                                                                                                                                                                                                                                                                                                                                                                                                                                                                                                                                                                                                                                                                                                                                                                                                                                                                                                                                                                                                                                                                                                                                                                                                                                                                                                                                                                                                                                                                                                                                                                                                               |
| YP_616341 | Sala_1294 | putative transcriptional acitvator, Baf family | 47.89%            | 8                       | R.RAMADTLAALSQSEIWR.Q<br>R.LAESSDKLSNAVIANHDQLAR.S<br>R.LAALGEEAAR.T<br>R.ATADSAANQAR.L<br>R.AVAANSAADR.L<br>R.LNASFAEAEASLAK.L<br>R.EAGLVAHQQGANLEAR.L<br>K.ILRDGAEPFSCGGAR.H<br>R.VSEAEQAIAASDRDLTAK.Q<br>R.SNEEQMTQQAANQALADR.L<br>R.MIATLAEVTRATADSAANQAR.L<br>R.IAAHVAEVKQ.Q<br>R.EAGDAIGAQLSEHADASDALAGR.I<br>R.DGAEPFSCGGAR.M<br>R.AMADTLAALSQSEIWR.Q<br>K.LYVALAQIDRL.L<br>R.VVVTTFASNAAR.L<br>R.FALETGVPDVLQENGDLVR.L<br>R.EAAEQATGPARDEEK.L<br>K.NFVDSAISYR.G<br>R.EAAEQATGPAR.D<br>R.MVPLASHILEMSAVVIDTPYGR.V<br>R.LILDGDVILPADGETMSER.R<br>R.LATLGEVAR.A<br>R.EGLEQAVGAAG.G<br>K.LEAGDTVVFSSK.Q<br>R.SVGLTDIPPTVDFDEAMR.L<br>R.LVVPVHGEIR.H<br>R.LAPGAAQIVR.V<br>R.DKVMVATGGQGEPR.A<br>R.GVPEDEREAFIDEMR.E<br>R.FTAGLIAHK.L<br>K.VMVATGGQGEPR.A<br>K.LAEGLLEGEVEIK.V<br>R.RIATDWTGK.K<br>K.KPVVDVMLVEI.<br>K.DLLGILLTHGHEDHGAIPYLAADLGVPLYANR.F                                                                                                                                                                                                                                                                                                                                                                                                                                                                                                                                                                                                                                                                                                                                                                                                                                                                                                                                                                                                                                                                                                                                                                                                                                                                                                                                                                                                                                                                                                                                                                                                                                                                                                                                                               |
| YP_616342 | Sala_1295 | Biotin--acetyl-CoA-carboxylase ligase          | 45.86%            | 9                       | R.RAMADTLAALSQSEIWR.Q<br>R.LAESSDKLSNAVIANHDQLAR.S<br>R.LAALGEEAAR.T<br>R.ATADSAANQAR.L<br>R.AVAANSAADR.L<br>R.LNASFAEAEASLAK.L<br>R.EAGLVAHQQGANLEAR.L<br>K.ILRDGAEPFSCGGAR.H<br>R.VSEAEQAIAASDRDLTAK.Q<br>R.SNEEQMTQQAANQALADR.L<br>R.MIATLAEVTRATADSAANQAR.L<br>R.IAAHVAEVKQ.Q<br>R.EAGDAIGAQLSEHADASDALAGR.I<br>R.DGAEPFSCGGAR.M<br>R.AMADTLAALSQSEIWR.Q<br>K.LYVALAQIDRL.L<br>R.VVVTTFASNAAR.L<br>R.FALETGVPDVLQENGDLVR.L<br>R.EAAEQATGPARDEEK.L<br>K.NFVDSAISYR.G<br>R.EAAEQATGPAR.D<br>R.MVPLASHILEMSAVVIDTPYGR.V<br>R.LILDGDVILPADGETMSER.R<br>R.LATLGEVAR.A<br>R.EGLEQAVGAAG.G<br>K.LEAGDTVVFSSK.Q<br>R.SVGLTDIPPTVDFDEAMR.L<br>R.LVVPVHGEIR.H<br>R.LAPGAAQIVR.V<br>R.DKVMVATGGQGEPR.A<br>R.GVPEDEREAFIDEMR.E<br>R.FTAGLIAHK.L<br>K.VMVATGGQGEPR.A<br>K.LAEGLLEGEVEIK.V<br>R.RIATDWTGK.K<br>K.KPVVDVMLVEI.<br>K.DLLGILLTHGHEDHGAIPYLAADLGVPLYANR.F                                                                                                                                                                                                                                                                                                                                                                                                                                                                                                                                                                                                                                                                                                                                                                                                                                                                                                                                                                                                                                                                                                                                                                                                                                                                                                                                                                                                                                                                                                                                                                                                                                                                                                                                                               |



| Accession | Locus tag | Description                                               | Sequence coverage | No. peptides identified | List of peptides identified                                                                                                                                                                                                                                                                                                                                                                                                                                                                                                                                                                                                                                                                                                                                                                                                                                                                                                                                                                                                                                                                                                                                                                                                                                                                                                                                                                                                                                                                                                                                                                                                                                                                                                                                                                                                                                                                                                                                                                                                                                                                                                                                                                                                                                                                                                                                                                                                                                                                                                                                                                                                                                                                                                                                                                                                                                                                                                                                                                                                                                                                                                                                                                                                   |
|-----------|-----------|-----------------------------------------------------------|-------------------|-------------------------|-------------------------------------------------------------------------------------------------------------------------------------------------------------------------------------------------------------------------------------------------------------------------------------------------------------------------------------------------------------------------------------------------------------------------------------------------------------------------------------------------------------------------------------------------------------------------------------------------------------------------------------------------------------------------------------------------------------------------------------------------------------------------------------------------------------------------------------------------------------------------------------------------------------------------------------------------------------------------------------------------------------------------------------------------------------------------------------------------------------------------------------------------------------------------------------------------------------------------------------------------------------------------------------------------------------------------------------------------------------------------------------------------------------------------------------------------------------------------------------------------------------------------------------------------------------------------------------------------------------------------------------------------------------------------------------------------------------------------------------------------------------------------------------------------------------------------------------------------------------------------------------------------------------------------------------------------------------------------------------------------------------------------------------------------------------------------------------------------------------------------------------------------------------------------------------------------------------------------------------------------------------------------------------------------------------------------------------------------------------------------------------------------------------------------------------------------------------------------------------------------------------------------------------------------------------------------------------------------------------------------------------------------------------------------------------------------------------------------------------------------------------------------------------------------------------------------------------------------------------------------------------------------------------------------------------------------------------------------------------------------------------------------------------------------------------------------------------------------------------------------------------------------------------------------------------------------------------------------------|
| YP_616343 | Sala_1296 | Proton-translocating NADH-quinone oxidoreductase, chain N | 10.29%            | 2                       | R.AWLFFAHPVGTPLR.V<br>R.TVAALAPDSGAQLK.W<br>R.TVAALAPDSGAQLKWPNDLLVDGAK.C<br>R.EGGETMLIHAGDVELR.R<br>R.DHFAGALGIAMIDALR.T<br>R.DEGGNQVESIPALGSLQR.R<br>K.ISAVPFHMWTPDVVEGAPTPVTFASAPK.V<br>R.GDVTTVVAR.L<br>R.VVFGELTKDDVK.A<br>R.FPGDGAALVAGGTR.L<br>K.RGDEGTRID.F<br>R.LLQQLYLNK.W<br>R.AQNISSQVR.R<br>R.LVDPGTGGQVEL.<br>K.SNIQQIGELLYTK.Y<br>R.AJANLADAPYR.<br>K.SFTLWEFVK.A<br>K.ATINYPFEKNPLSPR.F<br>K.LLANGDKWER.A<br>R.RYPNGEER.C<br>K.LCEAVCPAQAITIEAEP.R.D<br>R.FEELLYDK.A<br>R.TTRYDIDMTK.C<br>K.NPLSPR.F<br>R.GPNVVGPFGLLQSFADGLK.V<br>K.VFLQETIIPSGANR.G<br>R.ALVWALGSELLEGR.Q<br>R.FAEVAGVEDIGAIYR.G<br>K.VFAGPETDLYK.T<br>R.KDQQLVEATWAEFAEIK.A<br>K.DGWNFGNAVHVSAA.R.M<br>K.TEWLGDASLVAKPK.H<br>K.GAERPMLVFGGALSVPVHGAGLALAK.A<br>K.RDQQLVEATWAEFAEIK.A<br>R.AANJAVPALGGELADYGIWTPK.L<br>R.VNDDVNEEWASDKTR.H<br>R.WEAPLINTR.V<br>R.VNDDVNEEWASDK.T<br>K.AVFAPGDAREWISIFR.A<br>R.MGSLMLGYLPGGR.D<br>K.TLGDIMHDAVGTWYR.I<br>K.PYAFEARPWELTK.T<br>K.GAERPMLVFGGALSVPVHGAGLALAK.A<br>K.DFTTVNTEGR.V<br>R.DVIAAKPK.L<br>R.ALADALGVNVGDFSDFECDR.A<br>K.VYVGHHDGNGAHADVILPAAAWTEKDFTTVNTGR.V<br>K.LAFFLGADEVDFAAFAETK.V<br>K.HVLDALK.G<br>K.DGPDVFSAVLPIDYSTGGVEQPDVAVQPHVSLR.R<br>R.ELILSMVASNAEASALDK.I<br>R.SGVYDVFYR.K<br>R.LSVAASQPTIAAK.D<br>K.DGPDVFSAVLPIDYSTGGVEQPDVAVQPHVSLR.R.I<br>R.GVIGEVLYR.L<br>R.LSVAASQPTIAAK.D<br>R.AGISKEDR.A<br>R.EAETLFAAQEAYDAGLLGK.N<br>R.TGDADI/SEIDTLFDVTK.Q<br>R.IFTNLYGQPWNK.A<br>R.GAPWFASFGR.E<br>K.STDVVQAISR.I<br>K.SGYDFDFVHR.G<br>R.GQDAIIEEIK.A<br>R.HFRPELER.R<br>K.AVGSGLGTAATVMDK.S<br>R.LRTGDADISEIDTLFDVTK.Q<br>K.RGQDAIIEEIK.A<br>K.LIEGALIAGYAMR.A<br>R.WGAFAWTAENAEK.A<br>R.RHISEPEGPTTLK.E<br>R.RHISEPEGPTTLK.E<br>R.ILDELAAGKQPK.T<br>R.AYEVATYTYMYNAPVGR.Y<br>R.SAVMPLLDLAQR.Q<br>R.QVGAETQGWLPVPIEYVAAQLDMPFIR.A<br>R.ILDELAAGK.Q<br>K.EMVEANHDYRK.E<br>R.QVGAETQGWLPVPIEYVAAQLDMPFIR.A<br>K.LLLEVPAR.A<br>K.LFGDAMSLVIDNR.I<br>R.VEEVYQSAK.I<br>K.LLVDIGEWVETR.L<br>K.LYIEGFHVPAGEVYVATESPK.G<br>K.GEFVYLVSDGTNKPYPYR.C<br>R.GSGIAWDLR.K.S<br>K.TYLQALPYFDR.L<br>R.NVDIATVSKEDALAWGFGPMIR.G<br>K.SQPYDAYAAMFDFIPVGR.G<br>R.CSIAWDLR.K<br>K.EDALAWGFGPMIR.G<br>R.NFDLSPWEGADYVLPDEK.A<br>R.VSTDEATPVPVWVWVAGWLER.E<br>K.TTEKPADTGAGNK.T<br>R.ILTDYGFQGHQPK.R<br>K.DFFPLTYIELR.Y<br>R.DNLDYQLHEIAGDYDPRPER.F<br>R.FEVVHLLSVTK.N<br>R.EVFDMYGVLFAGPDLR.R<br>K.AGGTGEAPK.G<br>R.VRVSTDEATPVPVWVWVAGWLER.E<br>R.KDFPLTYIELR.Y<br>R.ILTDYGFQGHQPK.R.D<br>K.AGGTGEAPKGAPTMTAK.E<br>K.GFLVSTEDLFWAR.T<br>R.VYDQMSNPK.Y<br>R.RVYDQMSNPK.Y<br>R.VYDQMSNPK.Y<br>R.IVVDIYVPGCPPTAEALLYGMVQLQR.K<br>R.RTGTRIER.<br>K.AIVESQGWPAITVAK.E<br>K.AIVESQGWPAITVAKGDDPYESSR.N<br>R.DFGEIEHLQVSQK.G<br>R.IFGAIAPEVAGIR.R<br>K.LGGVNGVDYTAALYQVPTDESUYWAER.G<br>R.FGAASLDLAWVAAGR.Y<br>R.PGWFLMEEAGEIEGEPKPR.F<br>R.SEYIAGSAAVHSK.L<br>R.EAGGFVDFDR.G<br>R.TLYDELHAR.P<br>R.FIDPLDGTSNFHAIPHFAISIAVQEPK.L<br>R.RDFGEIEHLQVSQK.G<br>R.IFGAIAPEVAGIR.R.F<br>K.ITGVEIRPGNIEFEGGIWK.V<br>K.GQTASSSYKPAILDNGVR.V<br>K.DFYLYAEGDDLVMKDYEQITIGK.D<br>R.IVNVYDREYR.R<br>K.GGAYMQVEAK.N<br>K.IQHTQPK.G<br>K.DTYEQITIGK.D<br>R.IVNVYDR.E<br>K.GGAYMQVEAK.N<br>R.SADTVEKVR.L<br>R.LEEALAGPFAAFQFR.V<br>K.TLADAGADFAVAVSGVWNYR.D<br>R.VKGLDQHDAAAR.L<br>K.TLADAGADFAVAVSGVWNYRDGPAAVR.A |
| YP_616344 | Sala_1297 | proton-translocating NADH-quinone oxidoreductase, chain M | 4.06%             | 2                       |                                                                                                                                                                                                                                                                                                                                                                                                                                                                                                                                                                                                                                                                                                                                                                                                                                                                                                                                                                                                                                                                                                                                                                                                                                                                                                                                                                                                                                                                                                                                                                                                                                                                                                                                                                                                                                                                                                                                                                                                                                                                                                                                                                                                                                                                                                                                                                                                                                                                                                                                                                                                                                                                                                                                                                                                                                                                                                                                                                                                                                                                                                                                                                                                                               |
| YP_616345 | Sala_1298 | proton-translocating NADH-quinone oxidoreductase, chain L | 4.85%             | 3                       |                                                                                                                                                                                                                                                                                                                                                                                                                                                                                                                                                                                                                                                                                                                                                                                                                                                                                                                                                                                                                                                                                                                                                                                                                                                                                                                                                                                                                                                                                                                                                                                                                                                                                                                                                                                                                                                                                                                                                                                                                                                                                                                                                                                                                                                                                                                                                                                                                                                                                                                                                                                                                                                                                                                                                                                                                                                                                                                                                                                                                                                                                                                                                                                                                               |
| YP_616347 | Sala_1300 | NADH-ubiquinone/plastoquinone oxidoreductase, chain 6     | 16.75%            | 3                       |                                                                                                                                                                                                                                                                                                                                                                                                                                                                                                                                                                                                                                                                                                                                                                                                                                                                                                                                                                                                                                                                                                                                                                                                                                                                                                                                                                                                                                                                                                                                                                                                                                                                                                                                                                                                                                                                                                                                                                                                                                                                                                                                                                                                                                                                                                                                                                                                                                                                                                                                                                                                                                                                                                                                                                                                                                                                                                                                                                                                                                                                                                                                                                                                                               |
| YP_616348 | Sala_1301 | NADH-quinone oxidoreductase, chain I                      | 55.56%            | 9                       |                                                                                                                                                                                                                                                                                                                                                                                                                                                                                                                                                                                                                                                                                                                                                                                                                                                                                                                                                                                                                                                                                                                                                                                                                                                                                                                                                                                                                                                                                                                                                                                                                                                                                                                                                                                                                                                                                                                                                                                                                                                                                                                                                                                                                                                                                                                                                                                                                                                                                                                                                                                                                                                                                                                                                                                                                                                                                                                                                                                                                                                                                                                                                                                                                               |
| YP_616349 | Sala_1302 | respiratory-chain NADH dehydrogenase, subunit 1           | 9.51%             | 2                       |                                                                                                                                                                                                                                                                                                                                                                                                                                                                                                                                                                                                                                                                                                                                                                                                                                                                                                                                                                                                                                                                                                                                                                                                                                                                                                                                                                                                                                                                                                                                                                                                                                                                                                                                                                                                                                                                                                                                                                                                                                                                                                                                                                                                                                                                                                                                                                                                                                                                                                                                                                                                                                                                                                                                                                                                                                                                                                                                                                                                                                                                                                                                                                                                                               |
| YP_616350 | Sala_1303 | NADH-quinone oxidoreductase, chain G                      | 47.31%            | 23                      |                                                                                                                                                                                                                                                                                                                                                                                                                                                                                                                                                                                                                                                                                                                                                                                                                                                                                                                                                                                                                                                                                                                                                                                                                                                                                                                                                                                                                                                                                                                                                                                                                                                                                                                                                                                                                                                                                                                                                                                                                                                                                                                                                                                                                                                                                                                                                                                                                                                                                                                                                                                                                                                                                                                                                                                                                                                                                                                                                                                                                                                                                                                                                                                                                               |
| YP_616351 | Sala_1304 | hypothetical protein                                      | 39.32%            | 8                       |                                                                                                                                                                                                                                                                                                                                                                                                                                                                                                                                                                                                                                                                                                                                                                                                                                                                                                                                                                                                                                                                                                                                                                                                                                                                                                                                                                                                                                                                                                                                                                                                                                                                                                                                                                                                                                                                                                                                                                                                                                                                                                                                                                                                                                                                                                                                                                                                                                                                                                                                                                                                                                                                                                                                                                                                                                                                                                                                                                                                                                                                                                                                                                                                                               |
| YP_616352 | Sala_1305 | NADH-quinone oxidoreductase, F subunit                    | 30.70%            | 12                      |                                                                                                                                                                                                                                                                                                                                                                                                                                                                                                                                                                                                                                                                                                                                                                                                                                                                                                                                                                                                                                                                                                                                                                                                                                                                                                                                                                                                                                                                                                                                                                                                                                                                                                                                                                                                                                                                                                                                                                                                                                                                                                                                                                                                                                                                                                                                                                                                                                                                                                                                                                                                                                                                                                                                                                                                                                                                                                                                                                                                                                                                                                                                                                                                                               |
| YP_616353 | Sala_1306 | NADH-quinone oxidoreductase, E subunit                    | 49.55%            | 10                      |                                                                                                                                                                                                                                                                                                                                                                                                                                                                                                                                                                                                                                                                                                                                                                                                                                                                                                                                                                                                                                                                                                                                                                                                                                                                                                                                                                                                                                                                                                                                                                                                                                                                                                                                                                                                                                                                                                                                                                                                                                                                                                                                                                                                                                                                                                                                                                                                                                                                                                                                                                                                                                                                                                                                                                                                                                                                                                                                                                                                                                                                                                                                                                                                                               |
| YP_616355 | Sala_1308 | NADH dehydrogenase I, D subunit                           | 34.45%            | 12                      |                                                                                                                                                                                                                                                                                                                                                                                                                                                                                                                                                                                                                                                                                                                                                                                                                                                                                                                                                                                                                                                                                                                                                                                                                                                                                                                                                                                                                                                                                                                                                                                                                                                                                                                                                                                                                                                                                                                                                                                                                                                                                                                                                                                                                                                                                                                                                                                                                                                                                                                                                                                                                                                                                                                                                                                                                                                                                                                                                                                                                                                                                                                                                                                                                               |
| YP_616356 | Sala_1309 | NADH (or F420H2) dehydrogenase, subunit C                 | 56.57%            | 13                      |                                                                                                                                                                                                                                                                                                                                                                                                                                                                                                                                                                                                                                                                                                                                                                                                                                                                                                                                                                                                                                                                                                                                                                                                                                                                                                                                                                                                                                                                                                                                                                                                                                                                                                                                                                                                                                                                                                                                                                                                                                                                                                                                                                                                                                                                                                                                                                                                                                                                                                                                                                                                                                                                                                                                                                                                                                                                                                                                                                                                                                                                                                                                                                                                                               |
| YP_616357 | Sala_1310 | NADH-quinone oxidoreductase, B subunit                    | 33.33%            | 6                       |                                                                                                                                                                                                                                                                                                                                                                                                                                                                                                                                                                                                                                                                                                                                                                                                                                                                                                                                                                                                                                                                                                                                                                                                                                                                                                                                                                                                                                                                                                                                                                                                                                                                                                                                                                                                                                                                                                                                                                                                                                                                                                                                                                                                                                                                                                                                                                                                                                                                                                                                                                                                                                                                                                                                                                                                                                                                                                                                                                                                                                                                                                                                                                                                                               |
| YP_616359 | Sala_1312 | hypothetical protein                                      | 16.25%            | 2                       |                                                                                                                                                                                                                                                                                                                                                                                                                                                                                                                                                                                                                                                                                                                                                                                                                                                                                                                                                                                                                                                                                                                                                                                                                                                                                                                                                                                                                                                                                                                                                                                                                                                                                                                                                                                                                                                                                                                                                                                                                                                                                                                                                                                                                                                                                                                                                                                                                                                                                                                                                                                                                                                                                                                                                                                                                                                                                                                                                                                                                                                                                                                                                                                                                               |
| YP_616360 | Sala_1313 | Inositol-1(or 4)-monophosphatase                          | 55.88%            | 11                      |                                                                                                                                                                                                                                                                                                                                                                                                                                                                                                                                                                                                                                                                                                                                                                                                                                                                                                                                                                                                                                                                                                                                                                                                                                                                                                                                                                                                                                                                                                                                                                                                                                                                                                                                                                                                                                                                                                                                                                                                                                                                                                                                                                                                                                                                                                                                                                                                                                                                                                                                                                                                                                                                                                                                                                                                                                                                                                                                                                                                                                                                                                                                                                                                                               |
| YP_616361 | Sala_1314 | translation elongation factor P                           | 55.61%            | 10                      |                                                                                                                                                                                                                                                                                                                                                                                                                                                                                                                                                                                                                                                                                                                                                                                                                                                                                                                                                                                                                                                                                                                                                                                                                                                                                                                                                                                                                                                                                                                                                                                                                                                                                                                                                                                                                                                                                                                                                                                                                                                                                                                                                                                                                                                                                                                                                                                                                                                                                                                                                                                                                                                                                                                                                                                                                                                                                                                                                                                                                                                                                                                                                                                                                               |
| YP_616362 | Sala_1315 | thiamine-phosphate pyrophosphorylase                      | 38.43%            | 8                       |                                                                                                                                                                                                                                                                                                                                                                                                                                                                                                                                                                                                                                                                                                                                                                                                                                                                                                                                                                                                                                                                                                                                                                                                                                                                                                                                                                                                                                                                                                                                                                                                                                                                                                                                                                                                                                                                                                                                                                                                                                                                                                                                                                                                                                                                                                                                                                                                                                                                                                                                                                                                                                                                                                                                                                                                                                                                                                                                                                                                                                                                                                                                                                                                                               |

| Accession | Locus tag | Description                                                       | Sequence coverage | No. peptides identified | List of peptides identified                                                                                                                                                                                                                                                                                                                                                                                                                                                                                                                                                                                                                                                                                                                                                                                                                                                                                                                                                                                                                                                                                                                                                                                                                                                                                                                                                                                                                                                                                                                                                                                                                                                                                                                                                                                                                                                                                                                                                                                                                                                                                                                                                                                                                                                                                                                                                                                                                                                                                                                                                                                                                                                                                                                                                                                                                                                                  |
|-----------|-----------|-------------------------------------------------------------------|-------------------|-------------------------|----------------------------------------------------------------------------------------------------------------------------------------------------------------------------------------------------------------------------------------------------------------------------------------------------------------------------------------------------------------------------------------------------------------------------------------------------------------------------------------------------------------------------------------------------------------------------------------------------------------------------------------------------------------------------------------------------------------------------------------------------------------------------------------------------------------------------------------------------------------------------------------------------------------------------------------------------------------------------------------------------------------------------------------------------------------------------------------------------------------------------------------------------------------------------------------------------------------------------------------------------------------------------------------------------------------------------------------------------------------------------------------------------------------------------------------------------------------------------------------------------------------------------------------------------------------------------------------------------------------------------------------------------------------------------------------------------------------------------------------------------------------------------------------------------------------------------------------------------------------------------------------------------------------------------------------------------------------------------------------------------------------------------------------------------------------------------------------------------------------------------------------------------------------------------------------------------------------------------------------------------------------------------------------------------------------------------------------------------------------------------------------------------------------------------------------------------------------------------------------------------------------------------------------------------------------------------------------------------------------------------------------------------------------------------------------------------------------------------------------------------------------------------------------------------------------------------------------------------------------------------------------------|
| YP_616364 | Sala_1317 | Fructose-bisphosphate aldolase                                    | 73.65%            | 16                      | R.AFAEILGNQ.PAG.<br>R.LKADGVHLGQGDGDPK.E<br>K.ADGVHLGQGDGDPK.E<br>K.GLQHDAAAR.L<br>K.VIGAILFER.T<br>R.SVNLAHVPVGIK.A<br>R.IATHGLVPPIEPEVNIK.S<br>R.VVALSGGFTR.G<br>K.ELLAALDGTGAPVMLK.L<br>K.AIVDQFAEAAR.I<br>K.SQGFIAALDQSGGSTPK.A<br>K.NPGIIASFSA.A<br>K.LSLPAEAGLFQPLVDHPR.V<br>K.VDKGLEDEADGVQLMK.A<br>R.TMDGQAGGKVPVPSLWLR.G<br>K.GLEDEADGVQLMK.A<br>K.GYIGEDAFSNDDEMFALIHDMR.S<br>K.ELLAALDGTGAPVMLK.L<br>R.HQMSDDEFNASLGTALDEIHAASVA.<br>.MTTANAEMLDQIK.S                                                                                                                                                                                                                                                                                                                                                                                                                                                                                                                                                                                                                                                                                                                                                                                                                                                                                                                                                                                                                                                                                                                                                                                                                                                                                                                                                                                                                                                                                                                                                                                                                                                                                                                                                                                                                                                                                                                                                                                                                                                                                                                                                                                                                                                                                                                                                                                                                             |
| YP_616365 | Sala_1318 | Phosphoglycerate kinase                                           | 64.57%            | 16                      | K.AGVAVLAPGDVAVENTR.F<br>R.TLVWNGPLGAFETPPDTATVALAR.T<br>K.NPTQSLVNLVGGVEVLGHSVMFIPAVGEGAK.A<br>R.FYPGEEQNDPAFADALEIGDLYVNFSAHR.A<br>K.TLDDIGDVTGKR.V<br>R.TVNVHVAADEMILDVGAIEALADV.LK.N<br>K.ALDAALGNPVQVAAVGGAK.V<br>R.VDLNVPMDGAVSDATR.I<br>K.VDHLIGGMANTFLAAR.G<br>R.RLPAYAGR.A<br>K.TLDDIGDVTGK.R<br>R.TAAALTR.E<br>R.NLVGKVDHLIIGGMANTFLAAR.G<br>R.IQAAMPTTR.E<br>R.AHGSTEGIAR.R<br>K.GAIVLLAHFGR.P<br>R.VVSWYDNEWGFSNR.M<br>R.VPTPNVSLVDLFTFPK.R<br>K.VLNDTLGIER.G<br>R.DTSVAEVNQILK.D<br>K.RDTSVAEVNQILK.D<br>R.DSVHGPPPEVSADGDQMVGGK.A<br>R.AVGEVLPELKG<br>R.GLMTTVHAYTNDQK.I<br>K.GADLVVYGVNHDK.L<br>R.AAGMSIIPITTTGAAR.A<br>R.HVDTAGVIAK.L<br>K.ILDQIHSDMR.R<br>K.ANALLFK.R<br>K.LDGSAIRVPTPNVSLVDLFTFPK.R<br>R.DTSVAEVNQILK.DASEGALK.G<br>K.RVLISAPAK.G<br>R.VPTPNVSLVDLFTFPK.R<br>K.GKLDGSAIR.V<br>R.AVGEVLPELKG.L<br>R.VLISAPAK.G<br>K.ANALLFK.R<br>K.RDSVHGPPPEVSADGDQMVGGK.A<br>K.HLAAGAK.R<br>R.HVDTAGVIAK.L<br>R.GLMTTVHAYTNDQK.I<br>R.DSVHGPPPEVSADGDQMVGGK.A<br>R.AILERPDCGLELVAINDLADAK.A<br>R.AAGMSIIPITTTGAAR.A<br>K.ILDQIHSDMR.R<br>K.ERDPANLPHGELGIDIALECTGFTDR.E<br>K.DASEGALK.G<br>K.VAINGFGR.I<br>K.RDTSVAEVNQILK.DASEGALK.G<br>K.LTAEHVWVSNASCTTNCLAPVAK.V<br>K.HLAAGAK.V<br>K.GADLVVYGVNHDK.LTAEHVWVSNASCTTNCLAPVAK.V<br>R.FGIDFSFGASAPIEDF.H<br>R.HFLGADAITPOLAR.L<br>K.QGTSATHGAPLGADEIAAAR.R<br>R.HLNALYGDGLVDHR.T<br>R.ELGWTAEPFVPIADIAAASWAFGEK.G<br>K.AYLDGLAAEPK.V<br>R.TIIFGAPNK.Q<br>R.HDVTENR.C<br>R.KASENTLSALTVDIAALVGGSDLTGSNNTK.T<br>K.ASENTLSALTVDIAALVGGSDLTGSNNTK.T<br>R.VYVMTHTDSIGLGEDGPHQPIEHLQSLR.A<br>R.RELGSWTAEFPVPIADIAAASWAFGEK.G<br>K.KNDFEAR.L<br>R.YIYYGR.E<br>R.LTVLWDDNK.I<br>R.ALAMDVAQAANSHPMPGMADVATVLYSDYLK.F<br>R.AIDAALADPR.P<br>K.TSSKPLTR.N<br>R.YAATGWHVESCDSGHPADIRR.A<br>R.PSLLALTR.Q<br>R.PADAVETAECWALALAQEGRPSLLALTR.Q<br>R.AIDAALADPRSLIACR.T<br>K.AYLDGLAAEPK.VATR.K<br>R.YAATGWHVESCDSGHPADIRR.R<br>R.QNLPRLR.H<br>K.LHNEWNSR.L<br>K.KLHNEWNSR.L<br>K.ITIDGSDLSTSEDVAAR.Y<br>R.EAVPAPAAANPAHNR.A<br>R.QLLFALMLADEVQEAR.G<br>K.IDVVEPQSDSLR.A<br>R.INVALGTVAGGQTR.T<br>R.GIVSLAAA.K.T<br>R.VISDPFNNTNPK.L<br>R.LFVVDIIPALANNVAVGVTLR.A<br>R.EGGTAGSQGAITETTIGANTAGKDTVFADTAGVTDGADR.D<br>R.EGGTAGSQGAITETTIGANTAGK.D<br>K.DTVFADTAGVTDGADR.D<br>R.DNISSGTVGSWAADTLISGYIDELVDTAIR.L<br>R.LGGTVTAGTCDNADGAVGYSAPNVSGTIATIAAGATR.T<br>R.YDDEAGVTR.Y<br>R.DAQKHWLQASETR.L<br>R.LPDIGEIAEIEVAHVHK.V<br>R.YSAGQGYHAPGASR.A<br>K.LIETPVLFFAD.<br>K.NVVQLASETR.L<br>K.IPLPLAGGAGGAGGVPVAPVAVSETSPPTTPASGR.G<br>R.VVDGWDAAASYQALKK.L<br>R.ARADEPK.V<br>R.TLLPLDIAIEASVK.K<br>K.GLLIAIEDNDPVFLEPK.R<br>R.VTGFDTYPHSLWAYFPVPR.I<br>R.TSGFGAELALVQER.C<br>K.HDASAVPEGYR.I<br>R.EGAVTVLAYGTMVHK.T<br>R.TLLPLDIAIEASVKK.T<br>R.AEGHSTDDPGAYR.A<br>R.AAQEASAVPFGDPIAR.L<br>R.VDGNPLAVYAATQWADR.A<br>R.YRPGDTPDFSDIEIPAVEATPR.P<br>R.DYPLIQMHNQVSNR.G<br>R.AVGYIAELR.V<br>R.VLDFDGIK.G<br>K.GRPASNLPLSLHIPR.Y<br>K.GPWNPLAPDR.L |
| YP_616366 | Sala_1319 | glyceraldehyde-3-phosphate dehydrogenase, type I                  | 88.96%            | 36                      | R.DTSVAEVNQILK.D<br>K.RDTSVAEVNQILK.D<br>R.DSVHGPPPEVSADGDQMVGGK.A<br>R.AVGEVLPELKG<br>R.GLMTTVHAYTNDQK.I<br>K.GADLVVYGVNHDK.L<br>R.AAGMSIIPITTTGAAR.A<br>R.HVDTAGVIAK.L<br>K.ILDQIHSDMR.R<br>K.ANALLFK.R<br>K.LDGSAIRVPTPNVSLVDLFTFPK.R<br>R.DTSVAEVNQILK.DASEGALK.G<br>K.RVLISAPAK.G<br>R.VPTPNVSLVDLFTFPK.R<br>K.GKLDGSAIR.V<br>R.AVGEVLPELKG.L<br>R.VLISAPAK.G<br>K.ANALLFK.R<br>K.RDSVHGPPPEVSADGDQMVGGK.A<br>K.HLAAGAK.R<br>R.HVDTAGVIAK.L<br>R.GLMTTVHAYTNDQK.I<br>R.DSVHGPPPEVSADGDQMVGGK.A<br>R.AILERPDCGLELVAINDLADAK.A<br>R.AAGMSIIPITTTGAAR.A<br>K.ILDQIHSDMR.R<br>K.ERDPANLPHGELGIDIALECTGFTDR.E<br>K.DASEGALK.G<br>K.VAINGFGR.I<br>K.RDTSVAEVNQILK.DASEGALK.G<br>K.LTAEHVWVSNASCTTNCLAPVAK.V<br>K.HLAAGAK.V<br>K.GADLVVYGVNHDK.LTAEHVWVSNASCTTNCLAPVAK.V<br>R.FGIDFSFGASAPIEDF.H<br>R.HFLGADAITPOLAR.L<br>K.QGTSATHGAPLGADEIAAAR.R<br>R.HLNALYGDGLVDHR.T<br>R.ELGWTAEPFVPIADIAAASWAFGEK.G<br>K.AYLDGLAAEPK.V<br>R.TIIFGAPNK.Q<br>R.HDVTENR.C<br>R.KASENTLSALTVDIAALVGGSDLTGSNNTK.T<br>K.ASENTLSALTVDIAALVGGSDLTGSNNTK.T<br>R.VYVMTHTDSIGLGEDGPHQPIEHLQSLR.A<br>R.RELGSWTAEFPVPIADIAAASWAFGEK.G<br>K.KNDFEAR.L<br>R.YIYYGR.E<br>R.LTVLWDDNK.I<br>R.ALAMDVAQAANSHPMPGMADVATVLYSDYLK.F<br>R.AIDAALADPR.P<br>K.TSSKPLTR.N<br>R.YAATGWHVESCDSGHPADIRR.A<br>R.PSLLALTR.Q<br>R.PADAVETAECWALALAQEGRPSLLALTR.Q<br>R.AIDAALADPRSLIACR.T<br>K.AYLDGLAAEPK.VATR.K<br>R.YAATGWHVESCDSGHPADIRR.R<br>R.QNLPRLR.H<br>K.LHNEWNSR.L<br>K.KLHNEWNSR.L<br>K.ITIDGSDLSTSEDVAAR.Y<br>R.EAVPAPAAANPAHNR.A<br>R.QLLFALMLADEVQEAR.G<br>K.IDVVEPQSDSLR.A<br>R.INVALGTVAGGQTR.T<br>R.GIVSLAAA.K.T<br>R.VISDPFNNTNPK.L<br>R.LFVVDIIPALANNVAVGVTLR.A<br>R.EGGTAGSQGAITETTIGANTAGKDTVFADTAGVTDGADR.D<br>R.EGGTAGSQGAITETTIGANTAGK.D<br>K.DTVFADTAGVTDGADR.D<br>R.DNISSGTVGSWAADTLISGYIDELVDTAIR.L<br>R.LGGTVTAGTCDNADGAVGYSAPNVSGTIATIAAGATR.T<br>R.YDDEAGVTR.Y<br>R.DAQKHWLQASETR.L<br>R.LPDIGEIAEIEVAHVHK.V<br>R.YSAGQGYHAPGASR.A<br>K.LIETPVLFFAD.<br>K.NVVQLASETR.L<br>K.IPLPLAGGAGGAGGVPVAPVAVSETSPPTTPASGR.G<br>R.VVDGWDAAASYQALKK.L<br>R.ARADEPK.V<br>R.TLLPLDIAIEASVK.K<br>K.GLLIAIEDNDPVFLEPK.R<br>R.VTGFDTYPHSLWAYFPVPR.I<br>R.TSGFGAELALVQER.C<br>K.HDASAVPEGYR.I<br>R.EGAVTVLAYGTMVHK.T<br>R.TLLPLDIAIEASVKK.T<br>R.AEGHSTDDPGAYR.A<br>R.AAQEASAVPFGDPIAR.L<br>R.VDGNPLAVYAATQWADR.A<br>R.YRPGDTPDFSDIEIPAVEATPR.P<br>R.DYPLIQMHNQVSNR.G<br>R.AVGYIAELR.V<br>R.VLDFDGIK.G<br>K.GRPASNLPLSLHIPR.Y<br>K.GPWNPLAPDR.L                                                                                                                                                                                                                                                                                                                                                                                                                                                                              |
| YP_616367 | Sala_1320 | transketolase                                                     | 53.33%            | 28                      | K.GADLVVYGVNHDK.LTAEHVWVSNASCTTNCLAPVAK.V<br>R.FGIDFSFGASAPIEDF.H<br>R.HFLGADAITPOLAR.L<br>K.QGTSATHGAPLGADEIAAAR.R<br>R.HLNALYGDGLVDHR.T<br>R.ELGWTAEPFVPIADIAAASWAFGEK.G<br>K.AYLDGLAAEPK.V<br>R.TIIFGAPNK.Q<br>R.HDVTENR.C<br>R.KASENTLSALTVDIAALVGGSDLTGSNNTK.T<br>K.ASENTLSALTVDIAALVGGSDLTGSNNTK.T<br>R.VYVMTHTDSIGLGEDGPHQPIEHLQSLR.A<br>R.RELGSWTAEFPVPIADIAAASWAFGEK.G<br>K.KNDFEAR.L<br>R.YIYYGR.E<br>R.LTVLWDDNK.I<br>R.ALAMDVAQAANSHPMPGMADVATVLYSDYLK.F<br>R.AIDAALADPR.P<br>K.TSSKPLTR.N<br>R.YAATGWHVESCDSGHPADIRR.A<br>R.PSLLALTR.Q<br>R.PADAVETAECWALALAQEGRPSLLALTR.Q<br>R.AIDAALADPRSLIACR.T<br>K.AYLDGLAAEPK.VATR.K<br>R.YAATGWHVESCDSGHPADIRR.R<br>R.QNLPRLR.H<br>K.LHNEWNSR.L<br>K.KLHNEWNSR.L<br>K.ITIDGSDLSTSEDVAAR.Y<br>R.EAVPAPAAANPAHNR.A<br>R.QLLFALMLADEVQEAR.G<br>K.IDVVEPQSDSLR.A<br>R.INVALGTVAGGQTR.T<br>R.GIVSLAAA.K.T<br>R.VISDPFNNTNPK.L<br>R.LFVVDIIPALANNVAVGVTLR.A<br>R.EGGTAGSQGAITETTIGANTAGKDTVFADTAGVTDGADR.D<br>R.EGGTAGSQGAITETTIGANTAGK.D<br>K.DTVFADTAGVTDGADR.D<br>R.DNISSGTVGSWAADTLISGYIDELVDTAIR.L<br>R.LGGTVTAGTCDNADGAVGYSAPNVSGTIATIAAGATR.T<br>R.YDDEAGVTR.Y<br>R.DAQKHWLQASETR.L<br>R.LPDIGEIAEIEVAHVHK.V<br>R.YSAGQGYHAPGASR.A<br>K.LIETPVLFFAD.<br>K.NVVQLASETR.L<br>K.IPLPLAGGAGGAGGVPVAPVAVSETSPPTTPASGR.G<br>R.VVDGWDAAASYQALKK.L<br>R.ARADEPK.V<br>R.TLLPLDIAIEASVK.K<br>K.GLLIAIEDNDPVFLEPK.R<br>R.VTGFDTYPHSLWAYFPVPR.I<br>R.TSGFGAELALVQER.C<br>K.HDASAVPEGYR.I<br>R.EGAVTVLAYGTMVHK.T<br>R.TLLPLDIAIEASVKK.T<br>R.AEGHSTDDPGAYR.A<br>R.AAQEASAVPFGDPIAR.L<br>R.VDGNPLAVYAATQWADR.A<br>R.YRPGDTPDFSDIEIPAVEATPR.P<br>R.DYPLIQMHNQVSNR.G<br>R.AVGYIAELR.V<br>R.VLDFDGIK.G<br>K.GRPASNLPLSLHIPR.Y<br>K.GPWNPLAPDR.L                                                                                                                                                                                                                                                                                                                                                                                                                                                                                                                                                                                                                                                                                                                                                                                                                                                                                                                                                                                                                                                                                                                                                                                                           |
| YP_616368 | Sala_1321 | protein of unknown function DUF710                                | 30.41%            | 3                       | R.EAVPAPAAANPAHNR.A<br>R.QLLFALMLADEVQEAR.G<br>K.IDVVEPQSDSLR.A<br>R.INVALGTVAGGQTR.T<br>R.GIVSLAAA.K.T<br>R.VISDPFNNTNPK.L<br>R.LFVVDIIPALANNVAVGVTLR.A<br>R.EGGTAGSQGAITETTIGANTAGKDTVFADTAGVTDGADR.D<br>R.EGGTAGSQGAITETTIGANTAGK.D<br>K.DTVFADTAGVTDGADR.D<br>R.DNISSGTVGSWAADTLISGYIDELVDTAIR.L<br>R.LGGTVTAGTCDNADGAVGYSAPNVSGTIATIAAGATR.T<br>R.YDDEAGVTR.Y<br>R.DAQKHWLQASETR.L<br>R.LPDIGEIAEIEVAHVHK.V<br>R.YSAGQGYHAPGASR.A<br>K.LIETPVLFFAD.<br>K.NVVQLASETR.L<br>K.IPLPLAGGAGGAGGVPVAPVAVSETSPPTTPASGR.G<br>R.VVDGWDAAASYQALKK.L<br>R.ARADEPK.V<br>R.TLLPLDIAIEASVK.K<br>K.GLLIAIEDNDPVFLEPK.R<br>R.VTGFDTYPHSLWAYFPVPR.I<br>R.TSGFGAELALVQER.C<br>K.HDASAVPEGYR.I<br>R.EGAVTVLAYGTMVHK.T<br>R.TLLPLDIAIEASVKK.T<br>R.AEGHSTDDPGAYR.A<br>R.AAQEASAVPFGDPIAR.L<br>R.VDGNPLAVYAATQWADR.A<br>R.YRPGDTPDFSDIEIPAVEATPR.P<br>R.DYPLIQMHNQVSNR.G<br>R.AVGYIAELR.V<br>R.VLDFDGIK.G<br>K.GRPASNLPLSLHIPR.Y<br>K.GPWNPLAPDR.L                                                                                                                                                                                                                                                                                                                                                                                                                                                                                                                                                                                                                                                                                                                                                                                                                                                                                                                                                                                                                                                                                                                                                                                                                                                                                                                                                                                                                                                                                                                                                                                                                                                                                                                                                                                                                                                                                                                                                            |
| YP_616372 | Sala_1325 | Protein of unknown function DUF11                                 | 7.21%             | 2                       | R.INVALGTVAGGQTR.T<br>R.GIVSLAAA.K.T<br>R.VISDPFNNTNPK.L<br>R.LFVVDIIPALANNVAVGVTLR.A<br>R.EGGTAGSQGAITETTIGANTAGKDTVFADTAGVTDGADR.D<br>R.EGGTAGSQGAITETTIGANTAGK.D<br>K.DTVFADTAGVTDGADR.D<br>R.DNISSGTVGSWAADTLISGYIDELVDTAIR.L<br>R.LGGTVTAGTCDNADGAVGYSAPNVSGTIATIAAGATR.T<br>R.YDDEAGVTR.Y<br>R.DAQKHWLQASETR.L<br>R.LPDIGEIAEIEVAHVHK.V<br>R.YSAGQGYHAPGASR.A<br>K.LIETPVLFFAD.<br>K.NVVQLASETR.L<br>K.IPLPLAGGAGGAGGVPVAPVAVSETSPPTTPASGR.G<br>R.VVDGWDAAASYQALKK.L<br>R.ARADEPK.V<br>R.TLLPLDIAIEASVK.K<br>K.GLLIAIEDNDPVFLEPK.R<br>R.VTGFDTYPHSLWAYFPVPR.I<br>R.TSGFGAELALVQER.C<br>K.HDASAVPEGYR.I<br>R.EGAVTVLAYGTMVHK.T<br>R.TLLPLDIAIEASVKK.T<br>R.AEGHSTDDPGAYR.A<br>R.AAQEASAVPFGDPIAR.L<br>R.VDGNPLAVYAATQWADR.A<br>R.YRPGDTPDFSDIEIPAVEATPR.P<br>R.DYPLIQMHNQVSNR.G<br>R.AVGYIAELR.V<br>R.VLDFDGIK.G<br>K.GRPASNLPLSLHIPR.Y<br>K.GPWNPLAPDR.L                                                                                                                                                                                                                                                                                                                                                                                                                                                                                                                                                                                                                                                                                                                                                                                                                                                                                                                                                                                                                                                                                                                                                                                                                                                                                                                                                                                                                                                                                                                                                                                                                                                                                                                                                                                                                                                                                                                                                                                                                               |
| YP_616374 | Sala_1327 | protein of unknown function DUF11                                 | 40.68%            | 7                       | R.INVALGTVAGGQTR.T<br>R.GIVSLAAA.K.T<br>R.VISDPFNNTNPK.L<br>R.LFVVDIIPALANNVAVGVTLR.A<br>R.EGGTAGSQGAITETTIGANTAGKDTVFADTAGVTDGADR.D<br>R.EGGTAGSQGAITETTIGANTAGK.D<br>K.DTVFADTAGVTDGADR.D<br>R.DNISSGTVGSWAADTLISGYIDELVDTAIR.L<br>R.LGGTVTAGTCDNADGAVGYSAPNVSGTIATIAAGATR.T<br>R.YDDEAGVTR.Y<br>R.DAQKHWLQASETR.L<br>R.LPDIGEIAEIEVAHVHK.V<br>R.YSAGQGYHAPGASR.A<br>K.LIETPVLFFAD.<br>K.NVVQLASETR.L<br>K.IPLPLAGGAGGAGGVPVAPVAVSETSPPTTPASGR.G<br>R.VVDGWDAAASYQALKK.L<br>R.ARADEPK.V<br>R.TLLPLDIAIEASVK.K<br>K.GLLIAIEDNDPVFLEPK.R<br>R.VTGFDTYPHSLWAYFPVPR.I<br>R.TSGFGAELALVQER.C<br>K.HDASAVPEGYR.I<br>R.EGAVTVLAYGTMVHK.T<br>R.TLLPLDIAIEASVKK.T<br>R.AEGHSTDDPGAYR.A<br>R.AAQEASAVPFGDPIAR.L<br>R.VDGNPLAVYAATQWADR.A<br>R.YRPGDTPDFSDIEIPAVEATPR.P<br>R.DYPLIQMHNQVSNR.G<br>R.AVGYIAELR.V<br>R.VLDFDGIK.G<br>K.GRPASNLPLSLHIPR.Y<br>K.GPWNPLAPDR.L                                                                                                                                                                                                                                                                                                                                                                                                                                                                                                                                                                                                                                                                                                                                                                                                                                                                                                                                                                                                                                                                                                                                                                                                                                                                                                                                                                                                                                                                                                                                                                                                                                                                                                                                                                                                                                                                                                                                                                                                                               |
| YP_616376 | Sala_1329 | catalytic domain of components of various dehydrogenase complexes | 29.93%            | 9                       | R.DAQKHWLQASETR.L<br>R.LPDIGEIAEIEVAHVHK.V<br>R.YSAGQGYHAPGASR.A<br>K.LIETPVLFFAD.<br>K.NVVQLASETR.L<br>K.IPLPLAGGAGGAGGVPVAPVAVSETSPPTTPASGR.G<br>R.VVDGWDAAASYQALKK.L<br>R.ARADEPK.V<br>R.TLLPLDIAIEASVK.K<br>K.GLLIAIEDNDPVFLEPK.R<br>R.VTGFDTYPHSLWAYFPVPR.I<br>R.TSGFGAELALVQER.C<br>K.HDASAVPEGYR.I<br>R.EGAVTVLAYGTMVHK.T<br>R.TLLPLDIAIEASVKK.T<br>R.AEGHSTDDPGAYR.A<br>R.AAQEASAVPFGDPIAR.L<br>R.VDGNPLAVYAATQWADR.A<br>R.YRPGDTPDFSDIEIPAVEATPR.P<br>R.DYPLIQMHNQVSNR.G<br>R.AVGYIAELR.V<br>R.VLDFDGIK.G<br>K.GRPASNLPLSLHIPR.Y<br>K.GPWNPLAPDR.L                                                                                                                                                                                                                                                                                                                                                                                                                                                                                                                                                                                                                                                                                                                                                                                                                                                                                                                                                                                                                                                                                                                                                                                                                                                                                                                                                                                                                                                                                                                                                                                                                                                                                                                                                                                                                                                                                                                                                                                                                                                                                                                                                                                                                                                                                                                                  |
| YP_616377 | Sala_1330 | Transketolase, central region                                     | 29.74%            | 7                       | R.TLLPLDIAIEASVK.K<br>K.GLLIAIEDNDPVFLEPK.R<br>R.VTGFDTYPHSLWAYFPVPR.I<br>R.TSGFGAELALVQER.C<br>K.HDASAVPEGYR.I<br>R.EGAVTVLAYGTMVHK.T<br>R.TLLPLDIAIEASVKK.T<br>R.AEGHSTDDPGAYR.A<br>R.AAQEASAVPFGDPIAR.L<br>R.VDGNPLAVYAATQWADR.A<br>R.YRPGDTPDFSDIEIPAVEATPR.P<br>R.DYPLIQMHNQVSNR.G<br>R.AVGYIAELR.V<br>R.VLDFDGIK.G<br>K.GRPASNLPLSLHIPR.Y<br>K.GPWNPLAPDR.L                                                                                                                                                                                                                                                                                                                                                                                                                                                                                                                                                                                                                                                                                                                                                                                                                                                                                                                                                                                                                                                                                                                                                                                                                                                                                                                                                                                                                                                                                                                                                                                                                                                                                                                                                                                                                                                                                                                                                                                                                                                                                                                                                                                                                                                                                                                                                                                                                                                                                                                            |
| YP_616378 | Sala_1331 | 3-methyl-2-oxobutanoate dehydrogenase (lipoamide)                 | 30.73%            | 9                       | R.AEGHSTDDPGAYR.A<br>R.AAQEASAVPFGDPIAR.L<br>R.VDGNPLAVYAATQWADR.A<br>R.YRPGDTPDFSDIEIPAVEATPR.P<br>R.DYPLIQMHNQVSNR.G<br>R.AVGYIAELR.V<br>R.VLDFDGIK.G<br>K.GRPASNLPLSLHIPR.Y<br>K.GPWNPLAPDR.L                                                                                                                                                                                                                                                                                                                                                                                                                                                                                                                                                                                                                                                                                                                                                                                                                                                                                                                                                                                                                                                                                                                                                                                                                                                                                                                                                                                                                                                                                                                                                                                                                                                                                                                                                                                                                                                                                                                                                                                                                                                                                                                                                                                                                                                                                                                                                                                                                                                                                                                                                                                                                                                                                             |

| Accession | Locus tag | Description                                             | Sequence coverage | No. peptides identified | List of peptides identified                                                                                                                                                                                                                                                                                                                                                                                                                                                                                                                                                                                                                                                                                                                                                                                                                                                                                                                                                                                                                                                                                                                                                                                                                                                                                                                                                                                                                                                                                                                                                                                                                                                                                                                                                                                                                                                                                                                                                                                                                                                                                                                                                                                                                                                                                                                                                                                                                                                                                                                                                                                                                                                                                                                                                                                                                                                                                                                                                                                                                                                                                                                                                                                                                                                                                                                                                              |
|-----------|-----------|---------------------------------------------------------|-------------------|-------------------------|------------------------------------------------------------------------------------------------------------------------------------------------------------------------------------------------------------------------------------------------------------------------------------------------------------------------------------------------------------------------------------------------------------------------------------------------------------------------------------------------------------------------------------------------------------------------------------------------------------------------------------------------------------------------------------------------------------------------------------------------------------------------------------------------------------------------------------------------------------------------------------------------------------------------------------------------------------------------------------------------------------------------------------------------------------------------------------------------------------------------------------------------------------------------------------------------------------------------------------------------------------------------------------------------------------------------------------------------------------------------------------------------------------------------------------------------------------------------------------------------------------------------------------------------------------------------------------------------------------------------------------------------------------------------------------------------------------------------------------------------------------------------------------------------------------------------------------------------------------------------------------------------------------------------------------------------------------------------------------------------------------------------------------------------------------------------------------------------------------------------------------------------------------------------------------------------------------------------------------------------------------------------------------------------------------------------------------------------------------------------------------------------------------------------------------------------------------------------------------------------------------------------------------------------------------------------------------------------------------------------------------------------------------------------------------------------------------------------------------------------------------------------------------------------------------------------------------------------------------------------------------------------------------------------------------------------------------------------------------------------------------------------------------------------------------------------------------------------------------------------------------------------------------------------------------------------------------------------------------------------------------------------------------------------------------------------------------------------------------------------------------------|
| YP_616379 | Sala_1332 | Thymidylate synthase                                    | 39.38%            | 11                      | K.ATGEAISATDFEAR.I<br>R.FEDFVVEDYAPQAHISAPVAV.<br>R.HIFFGWNVADLDR.M<br>R.RADHYNQJALIDSLK.N<br>R.ELLWFLTGDTRIRPLVAQGVK.I<br>R.KATGEAISATDFEAR.I<br>R.ADHGYNQJALIDSLK.N<br>K.WGDLGPVYGHQVWVWPR.Y<br>R.SDGLSCLLFQR.S<br>R.RHIFTGWNVADLDR.M<br>K.IWTDWPLEK.Y<br>R.VNGISPGPIADTEGMR.L<br>R.TVVDIDLNGTFNVFR.G<br>R.YPAGEAAYLVGGFNASYLR.R<br>R.EAGGALVIGVR.Y<br>K.KDDLIGAAEYVFGK.G<br>K.DDLIGAAEYVFGK.G<br>K.GAQGLAALIEDILK.E<br>R.RGDVLIPIR.V<br>K.GAQGLAALIEDILKEQEPNAVIVGR.E<br>R.YGSGTLYHK.V<br>R.GDVVLPIR.V<br>R.LIGANVGYMK.F<br>K.RYPAGEAAYLVGGFNASYLR.R<br>K.EQGEFNAYIVGR.E<br>R.NIQDLGYTEGVK.S<br>K.PLSDGQVYADGTR.A<br>R.EGGKDYVYSLTGGYQNPANLPK.E<br>R.DGLPSDFHAFYANEAAR.A<br>K.GFQVPSINPDGEPATR.D<br>R.AANNALPPDLSLTK.A<br>K.DVTAFLVWTAEPK.L<br>K.ELRPGTGLHYNPFYFNINLAMAK.P<br>K.NEWNVAHSFVK.H<br>K.LASDGLMHHWDLAQQR.G<br>K.DYVYSLTGGYQNPANLPK.E<br>R.LVYNAIGAYVPPR.N<br>R.QWLLGGFAPDAAALNR.F<br>K.WLDEKLP.L<br>K.DEQDTPHFHYTAK.D<br>K.HADKSAATA.<br>R.DVNAWGFIR.Y<br>R.NLTAEEIAEANSVPLSLDR.D<br>R.NLTAEEIAEANSVPLSLDRDAQTLAER.T<br>R.KGPAPTNLVPPYEFTSDVTVTIG.<br>K.GPAPTNLVPPYEFTSDVTVTIG.<br>R.DAQTIAER.T<br>R.WFEGGADLNPPYQEDTDAFHAR.L<br>R.FTYTSDREAEGLPEGGGGVVR.G<br>K.VGVNVSTVGGEFAPDFASSIHGAGDDPR.F<br>R.EAEGLPEGGGGVVR.G<br>K.TGNGIDAILMSLPLAK.W<br>R.YAEFNLVDR.G<br>K.WADEYFYIPHR.G<br>R.NFQLTQVGEAFLIFPR.I<br>R.GRYAEFNLVDR.G<br>K.RWFGGGADLNPPYQEDTDAFHAR.L<br>R.AIYNPIEAIR.T<br>R.LALVAPALADR.A<br>K.FDMGAAWDDTLK.S<br>K.FDMGAAWDDTLK.S<br>K.ATGFSEVDAALAR.T<br>R.AAAIHAEAGER.I<br>R.IWLLHPPLYTAGTSADPAELLDPR.F<br>R.VGVVQDLTR.R<br>R.IGIVTDDVR.G<br>K.LDAVEVQPSVSDSMIILDDAVGDVATVNSVDDGTGKK.S<br>K.KALAPDAPAK.K<br>K.AGSELVQSSGDELK.L<br>R.HLLVQLDDR.N<br>R.GFTIAESNGTLPPIR.S<br>R.FCDTDFVGTDTLGAQ.Y<br>R.DAAALADVIAESWGPSDDR.Y<br>K.EIFLTQGEQAQR.R<br>R.NAAANVQACIDLVMADPRWR.L<br>R.FGGSALTADVPKDVGTDPVTVPAR.N<br>R.HRVEESAAR.I<br>R.FGGSALTADVPK.D<br>R.IAAHVGAEEHIVLPLDR.R<br>K.GFADAGLADPTR.Y<br>K.ADIAEAAR.L<br>R.QAADIVIGVNDYSGYPCRPAPFQGFEL.<br>K.DGVGTDPVTVPAR.N<br>R.FHHAFLQHMK.A<br>R.LVQIDTQGAEGRPFQAEAR.R<br>R.LVQIDTQGAEGR.P<br>K.TIAATLDEELTPASLETLAWR.L<br>R.YQGVPLEGSSIGHAAEHYEQSEQIPSLISLAAR.H<br>R.LFHEDVREVPQTAIVSR.G<br>R.IIAHNSYVPAEK.L<br>K.LLAEAVTLVLSGTLK.T<br>R.HDHPEDHAK.T<br>R.VGVQYEPDGFIEAAR.A<br>K.ARPDADEPLADHVLAMVFEK.N<br>K.SILLWFLAK.L<br>R.GEEVDAVIDGAQSR.V<br>R.HFLNLADAGGAVATMIADAIDR.A<br>R.QLGGVPMILDAGTTQLGR.G<br>K.VAAMAPQVDER.L<br>R.VWDEAENRVAHQ.S<br>R.HFLNLADAGGAVATMIADAIDR.K<br>R.YADAIMIR.T<br>R.VWDEAENR.V<br>R.EAVAGADLVTDVWVSMGQDHAHNK.V<br>R.CSFDIAIR.Q<br>K.SDALFLHCLPAHRGEEVDAVIDGAQSR.V<br>R.QLGGVPMILDAGTTQLGR.G<br>R.TLGTISATNQEK.L<br>R.DNHWLLTVAAGDQVVR.I<br>R.AIQDQATLMHVSNLGSPQGEAFAQR.L<br>R.TGTLAYEQYGIAPDIMATAK.G<br>R.AYHSSAGNAEK.H<br>K.HNLTFFNFAHGR.T<br>R.GEGAYLIGR.G<br>R.GALEQLPNHDQLFESVR.G<br>K.I.SAGAASYTPPEA.<br>R.LRGALEQLPNHDQLFESVR.G<br>R.YLDFASGIAVNLGHGPHLTRA.A<br>R.GMVGTHGSTYGGNPLAMAAGAVFVILEGDFLDQVK.A<br>R.GMGLMLGVK.M<br>R.LVNTFADTFFVNSGAEAVECAIK.T<br>R.DLMLIFDEVQCGVAR.T<br>R.DICNERDLMLIFDEVQCGVAR.T<br>R.AIQDQATLMHVSNLGSPQGEAFAQR.L<br>K.GIGGGFPLGACLAKEK.A<br>R.TGTLAYEQYGIAPDIMATAK.G<br>R.PASQRFQLGLR.D<br>K.IPLWILGSSLFGAR.L<br>K.LSFLDLVPTDTGTIAQSLANAADLAR.H<br>R.QFPQDVLQLQFLAGDDR.L<br>R.TGADEIIIASSIYDHDAR.K<br>R.QEGLVSLPYSPLAGGLVSGK.Y<br>R.YHTIQNNVSLNRR.R<br>K.YQGGAAFEGAR.F<br>K.QHDFVASTIVGSAYDQLDPLDAK.D<br>K.NIFQAIDSLTR.L<br>K.QLSRPLVETDAAHLAFDAQGEVDTAR.G |
| YP_616383 | Sala_1336 | short-chain dehydrogenase/reductase SDR                 | 12.17%            | 2                       |                                                                                                                                                                                                                                                                                                                                                                                                                                                                                                                                                                                                                                                                                                                                                                                                                                                                                                                                                                                                                                                                                                                                                                                                                                                                                                                                                                                                                                                                                                                                                                                                                                                                                                                                                                                                                                                                                                                                                                                                                                                                                                                                                                                                                                                                                                                                                                                                                                                                                                                                                                                                                                                                                                                                                                                                                                                                                                                                                                                                                                                                                                                                                                                                                                                                                                                                                                                          |
| YP_616387 | Sala_1340 | Uncharacterized conserved protein UCP033924             | 38.61%            | 12                      |                                                                                                                                                                                                                                                                                                                                                                                                                                                                                                                                                                                                                                                                                                                                                                                                                                                                                                                                                                                                                                                                                                                                                                                                                                                                                                                                                                                                                                                                                                                                                                                                                                                                                                                                                                                                                                                                                                                                                                                                                                                                                                                                                                                                                                                                                                                                                                                                                                                                                                                                                                                                                                                                                                                                                                                                                                                                                                                                                                                                                                                                                                                                                                                                                                                                                                                                                                                          |
| YP_616390 | Sala_1343 | cytochrome c1                                           | 61.71%            | 11                      |                                                                                                                                                                                                                                                                                                                                                                                                                                                                                                                                                                                                                                                                                                                                                                                                                                                                                                                                                                                                                                                                                                                                                                                                                                                                                                                                                                                                                                                                                                                                                                                                                                                                                                                                                                                                                                                                                                                                                                                                                                                                                                                                                                                                                                                                                                                                                                                                                                                                                                                                                                                                                                                                                                                                                                                                                                                                                                                                                                                                                                                                                                                                                                                                                                                                                                                                                                                          |
| YP_616391 | Sala_1344 | cytochrome b/b6-like protein                            | 17.37%            | 6                       |                                                                                                                                                                                                                                                                                                                                                                                                                                                                                                                                                                                                                                                                                                                                                                                                                                                                                                                                                                                                                                                                                                                                                                                                                                                                                                                                                                                                                                                                                                                                                                                                                                                                                                                                                                                                                                                                                                                                                                                                                                                                                                                                                                                                                                                                                                                                                                                                                                                                                                                                                                                                                                                                                                                                                                                                                                                                                                                                                                                                                                                                                                                                                                                                                                                                                                                                                                                          |
| YP_616392 | Sala_1345 | Ubiquinol-cytochrome c reductase, iron-sulfur subunit   | 27.57%            | 5                       |                                                                                                                                                                                                                                                                                                                                                                                                                                                                                                                                                                                                                                                                                                                                                                                                                                                                                                                                                                                                                                                                                                                                                                                                                                                                                                                                                                                                                                                                                                                                                                                                                                                                                                                                                                                                                                                                                                                                                                                                                                                                                                                                                                                                                                                                                                                                                                                                                                                                                                                                                                                                                                                                                                                                                                                                                                                                                                                                                                                                                                                                                                                                                                                                                                                                                                                                                                                          |
| YP_616394 | Sala_1347 | Coproporphyrinogen oxidase                              | 46.85%            | 10                      |                                                                                                                                                                                                                                                                                                                                                                                                                                                                                                                                                                                                                                                                                                                                                                                                                                                                                                                                                                                                                                                                                                                                                                                                                                                                                                                                                                                                                                                                                                                                                                                                                                                                                                                                                                                                                                                                                                                                                                                                                                                                                                                                                                                                                                                                                                                                                                                                                                                                                                                                                                                                                                                                                                                                                                                                                                                                                                                                                                                                                                                                                                                                                                                                                                                                                                                                                                                          |
| YP_616396 | Sala_1349 | hypothetical protein                                    | 14.52%            | 4                       |                                                                                                                                                                                                                                                                                                                                                                                                                                                                                                                                                                                                                                                                                                                                                                                                                                                                                                                                                                                                                                                                                                                                                                                                                                                                                                                                                                                                                                                                                                                                                                                                                                                                                                                                                                                                                                                                                                                                                                                                                                                                                                                                                                                                                                                                                                                                                                                                                                                                                                                                                                                                                                                                                                                                                                                                                                                                                                                                                                                                                                                                                                                                                                                                                                                                                                                                                                                          |
| YP_616397 | Sala_1350 | lipote-protein ligase B                                 | 31.80%            | 5                       |                                                                                                                                                                                                                                                                                                                                                                                                                                                                                                                                                                                                                                                                                                                                                                                                                                                                                                                                                                                                                                                                                                                                                                                                                                                                                                                                                                                                                                                                                                                                                                                                                                                                                                                                                                                                                                                                                                                                                                                                                                                                                                                                                                                                                                                                                                                                                                                                                                                                                                                                                                                                                                                                                                                                                                                                                                                                                                                                                                                                                                                                                                                                                                                                                                                                                                                                                                                          |
| YP_616398 | Sala_1351 | hypothetical protein                                    | 43.86%            | 2                       |                                                                                                                                                                                                                                                                                                                                                                                                                                                                                                                                                                                                                                                                                                                                                                                                                                                                                                                                                                                                                                                                                                                                                                                                                                                                                                                                                                                                                                                                                                                                                                                                                                                                                                                                                                                                                                                                                                                                                                                                                                                                                                                                                                                                                                                                                                                                                                                                                                                                                                                                                                                                                                                                                                                                                                                                                                                                                                                                                                                                                                                                                                                                                                                                                                                                                                                                                                                          |
| YP_616401 | Sala_1354 | hypothetical protein                                    | 52.86%            | 7                       |                                                                                                                                                                                                                                                                                                                                                                                                                                                                                                                                                                                                                                                                                                                                                                                                                                                                                                                                                                                                                                                                                                                                                                                                                                                                                                                                                                                                                                                                                                                                                                                                                                                                                                                                                                                                                                                                                                                                                                                                                                                                                                                                                                                                                                                                                                                                                                                                                                                                                                                                                                                                                                                                                                                                                                                                                                                                                                                                                                                                                                                                                                                                                                                                                                                                                                                                                                                          |
| YP_616402 | Sala_1355 | ExsB                                                    | 52.86%            | 9                       |                                                                                                                                                                                                                                                                                                                                                                                                                                                                                                                                                                                                                                                                                                                                                                                                                                                                                                                                                                                                                                                                                                                                                                                                                                                                                                                                                                                                                                                                                                                                                                                                                                                                                                                                                                                                                                                                                                                                                                                                                                                                                                                                                                                                                                                                                                                                                                                                                                                                                                                                                                                                                                                                                                                                                                                                                                                                                                                                                                                                                                                                                                                                                                                                                                                                                                                                                                                          |
| YP_616403 | Sala_1356 | hypothetical protein                                    | 15.60%            | 2                       |                                                                                                                                                                                                                                                                                                                                                                                                                                                                                                                                                                                                                                                                                                                                                                                                                                                                                                                                                                                                                                                                                                                                                                                                                                                                                                                                                                                                                                                                                                                                                                                                                                                                                                                                                                                                                                                                                                                                                                                                                                                                                                                                                                                                                                                                                                                                                                                                                                                                                                                                                                                                                                                                                                                                                                                                                                                                                                                                                                                                                                                                                                                                                                                                                                                                                                                                                                                          |
| YP_616404 | Sala_1357 | Hsp33 protein                                           | 41.28%            | 6                       |                                                                                                                                                                                                                                                                                                                                                                                                                                                                                                                                                                                                                                                                                                                                                                                                                                                                                                                                                                                                                                                                                                                                                                                                                                                                                                                                                                                                                                                                                                                                                                                                                                                                                                                                                                                                                                                                                                                                                                                                                                                                                                                                                                                                                                                                                                                                                                                                                                                                                                                                                                                                                                                                                                                                                                                                                                                                                                                                                                                                                                                                                                                                                                                                                                                                                                                                                                                          |
| YP_616405 | Sala_1358 | ornithine carbamoyltransferase                          | 59.61%            | 15                      |                                                                                                                                                                                                                                                                                                                                                                                                                                                                                                                                                                                                                                                                                                                                                                                                                                                                                                                                                                                                                                                                                                                                                                                                                                                                                                                                                                                                                                                                                                                                                                                                                                                                                                                                                                                                                                                                                                                                                                                                                                                                                                                                                                                                                                                                                                                                                                                                                                                                                                                                                                                                                                                                                                                                                                                                                                                                                                                                                                                                                                                                                                                                                                                                                                                                                                                                                                                          |
| YP_616406 | Sala_1359 | acetylornithine and succinylornithine aminotransferases | 72.15%            | 20                      |                                                                                                                                                                                                                                                                                                                                                                                                                                                                                                                                                                                                                                                                                                                                                                                                                                                                                                                                                                                                                                                                                                                                                                                                                                                                                                                                                                                                                                                                                                                                                                                                                                                                                                                                                                                                                                                                                                                                                                                                                                                                                                                                                                                                                                                                                                                                                                                                                                                                                                                                                                                                                                                                                                                                                                                                                                                                                                                                                                                                                                                                                                                                                                                                                                                                                                                                                                                          |
| YP_616407 | Sala_1360 | luciferase-like protein                                 | 22.32%            | 4                       |                                                                                                                                                                                                                                                                                                                                                                                                                                                                                                                                                                                                                                                                                                                                                                                                                                                                                                                                                                                                                                                                                                                                                                                                                                                                                                                                                                                                                                                                                                                                                                                                                                                                                                                                                                                                                                                                                                                                                                                                                                                                                                                                                                                                                                                                                                                                                                                                                                                                                                                                                                                                                                                                                                                                                                                                                                                                                                                                                                                                                                                                                                                                                                                                                                                                                                                                                                                          |
| YP_616410 | Sala_1363 | aldo/keto reductase                                     | 23.96%            | 5                       |                                                                                                                                                                                                                                                                                                                                                                                                                                                                                                                                                                                                                                                                                                                                                                                                                                                                                                                                                                                                                                                                                                                                                                                                                                                                                                                                                                                                                                                                                                                                                                                                                                                                                                                                                                                                                                                                                                                                                                                                                                                                                                                                                                                                                                                                                                                                                                                                                                                                                                                                                                                                                                                                                                                                                                                                                                                                                                                                                                                                                                                                                                                                                                                                                                                                                                                                                                                          |
| YP_616412 | Sala_1365 | dienelactone hydrolase                                  | 40.00%            | 7                       |                                                                                                                                                                                                                                                                                                                                                                                                                                                                                                                                                                                                                                                                                                                                                                                                                                                                                                                                                                                                                                                                                                                                                                                                                                                                                                                                                                                                                                                                                                                                                                                                                                                                                                                                                                                                                                                                                                                                                                                                                                                                                                                                                                                                                                                                                                                                                                                                                                                                                                                                                                                                                                                                                                                                                                                                                                                                                                                                                                                                                                                                                                                                                                                                                                                                                                                                                                                          |

| Accession | Locus tag | Description                                                      | Sequence coverage | No. peptides identified | List of peptides identified                                                                                                                                                                                                                                                                                                                                                                                                                                                                                                                                                                                                                                                                                                                                                                                                                                                                                                                                                                                                                                                                                                                                                                                                                                                                                                                                                                                                                                                                                                                                                                                                                                                                                                                                                                                                                                                                                                                                                                                                                                                                                                                                                                                                                                                                                                                                                                                                                                                                                                                                                                                                                                                                                                                                                                                                                                                                                                                                                                                                                                                                                                                                                                                                                                                                                                                                                                                          |
|-----------|-----------|------------------------------------------------------------------|-------------------|-------------------------|----------------------------------------------------------------------------------------------------------------------------------------------------------------------------------------------------------------------------------------------------------------------------------------------------------------------------------------------------------------------------------------------------------------------------------------------------------------------------------------------------------------------------------------------------------------------------------------------------------------------------------------------------------------------------------------------------------------------------------------------------------------------------------------------------------------------------------------------------------------------------------------------------------------------------------------------------------------------------------------------------------------------------------------------------------------------------------------------------------------------------------------------------------------------------------------------------------------------------------------------------------------------------------------------------------------------------------------------------------------------------------------------------------------------------------------------------------------------------------------------------------------------------------------------------------------------------------------------------------------------------------------------------------------------------------------------------------------------------------------------------------------------------------------------------------------------------------------------------------------------------------------------------------------------------------------------------------------------------------------------------------------------------------------------------------------------------------------------------------------------------------------------------------------------------------------------------------------------------------------------------------------------------------------------------------------------------------------------------------------------------------------------------------------------------------------------------------------------------------------------------------------------------------------------------------------------------------------------------------------------------------------------------------------------------------------------------------------------------------------------------------------------------------------------------------------------------------------------------------------------------------------------------------------------------------------------------------------------------------------------------------------------------------------------------------------------------------------------------------------------------------------------------------------------------------------------------------------------------------------------------------------------------------------------------------------------------------------------------------------------------------------------------------------------|
| YP_616413 | Sala_1366 | glucosamine--fructose-6-phosphate aminotransferase, isomerizing  | 65.90%            | 24                      | K.AGYLFAIAEDDDKESPNK.V<br>R.VYDEAAAEK.A<br>K.APVVDIAENHWGVAAR.E<br>R.AAASFHGSASVATKDKPSPHLLIPASK.A<br>R.LAGDGYAVLCVNPYR.W<br>R.VYDEAAAEKAWSR.Q<br>R.DGAQFDSENNPVER.E<br>R.LGSPVVVYGEGETFLGSDALALAPLTQR.I<br>R.IAYLDEGDVWVITR.D<br>K.HGPIALIDEAVVVLAPSPFLFEK.T<br>K.ELAGNPAPGTGIAHTR.W<br>R.YRDPVLQPGGLAFISQSGETADTLAALR.H<br>R.EADLLPTHAGPEIGVASTK.A<br>R.VPVIDVASEFR.Y<br>R.GPDYPLALEGALK.L<br>R.EVTSVGTAAAEK.G<br>K.SPTAVQAILPALR.G<br>R.TFSEETDTEVAHLVSEQVEAGK.S<br>K.YWFETFR.V<br>K.VHPLIAPLVYAVPVQQLLAYHVAVAK.G<br>K.HLVEAPALNAALAHDEDIAAMAHLIAPAR.D<br>R.GAFALAJFR.Q<br>R.DGAQFDSENNPVEREVTSVGTAAAEK.G<br>K.LSAAEEREIVK.H<br>R.TFSEETDTEVAHLVSEQVEAGKSPTAVQAILPALR.G<br>R.GYDSAGVCTVEGGQLIR.R<br>R.GRTFSEETDTEVAHLVSEQVEAGK.S<br>K.TVSNHCEVYAR.G<br>K.EIFEQPTVAQTLSSYR.P<br>R.PLEQTVALPQMDFDLSAIDR.I<br>R.IAWIEVLSK.G<br>R.LKSPDAIILATAQTR.G<br>R.LGSDAPAVVVLAFEPADPLQYGR.V<br>R.APETVWFSWDTQLGR.D<br>R.DVTIEPWFVGRGVK.I<br>R.AFIGSNSALVAPVK.I<br>R.AELAAEAQWQAFR.R<br>R.DLFALLAR.V<br>K.TDPADVGGINSR.A<br>K.EFYLVDIVNIANADGR.L<br>R.VTDDMAAKEFYLDVIVNIANADGR.L<br>K.VVVGDKADQLEALSQTAEALVQEPQLGTGHAVR.Q<br>K.VLHPIAGRMLLHLMASVDLSPAK.K<br>K.MVEHKDATDAER.A<br>K.HQTQIGER.A<br>R.LSISNALSSSR.I<br>R.SHHALTDGTR.S<br>R.LMMAILGEGTPK.T<br>R.FGLKPEWR.L<br>K.KLNLDNLFYR.L<br>R.LRDEAGVQFR.R<br>R.SSAAPVLFQR.V<br>R.DFETGFSVAADR.S<br>R.VEYRPAVGGANPLR.L<br>R.RDDDFLWTLGR.V<br>R.LTDAIANVTLAPNLQR.Q<br>R.GENLFDLPAISAAGIVER.A<br>R.FANGISVEAR.G<br>R.SAGSSDVTGAFAEWTSR.R<br>R.EGNIGGAPISDAR.F<br>R.DPAGGAQWLALAYVQLR.D<br>R.ATWAYTDADVDSAGAAAMDGR.R<br>R.AVALAQAVIASDHPLNLR.V<br>R.VEVSLIAGEQR.S<br>R.RFETPLDDYPR.L<br>R.DLGLNEQTKDR.W<br>R.HWVQGFDALEAMAGDGR.F<br>R.DLGLNEQTK.D<br>K.GLDYERVEVSLIAGEQR.S<br>R.VFSNIVSDNSVNFAPAGNIVASVPTGLVLMANR.N<br>K.LTDGLSLDVANLTLR.G<br>K.GTAPAPLPTLRESMEAK.V<br>R.GASDAGIYVQSK.N<br>R.GAGTGGGSLDPSGQGGAGEGLLTSDDVLLTNFAVLNTK.G<br>K.VAEDVAASISPLIHIVDTEGK.M<br>R.HGLTAPYDATR.A<br>R.TITDEQWAHAK.E<br>K.IGLIGMSWASTELYR.H<br>R.ADEIDRIIYEELMGK.V<br>K.EVLIGSAQR.L<br>R.NVMTEAWFR.Q<br>R.IHVAAGVDVVLGEGA.<br>K.IGLIGMSWASTELYR.H<br>R.SFISVIAGGFGADAAAGAGGAK.E<br>K.SSPYGMPLDVEKA<br>K.YAHPVAGR.M<br>K.LNGNMSGAPILLPAR.H<br>R.FMGAMGTIAVTTLLMHVPR.L<br>K.AVTALVEAAAAR.G<br>R.TITVAALQALAPGVFEPNIK.A<br>K.SHPDGPGEYK.Y<br>K.YYFRPGNTGFK.I<br>R.KSHIPDGPGEYK.Y<br>K.IWEVFDTR.I<br>R.AMALMGAELLYPTALGSEPYDADLDSR.M<br>R.IGVGVCWQDQWPECAR.A<br>R.FYGHFADEWGDITQAFGASETALVETIDLDR.A<br>R.DGHYVNTLAMI[DPD]GIMGTYR.K<br>R.LGLPTAVPGAGALLSGRY.<br>R.LGLPTAVPGAGALLSGRY.<br>R.IGQIVPSSNVTETEIPALLR.A<br>R.EAVESATPADLLGTSLPQGNVTLAPIPRPR.K<br>R.GVAEADNLNIVGYVINDVSR.D<br>R.EAVESATPADLLGTSLPQGNVTLAPIPR.P<br>R.FMLNVNPLIADIAR.V<br>R.KNIFGIGLNYTEHVAESAR.A<br>R.ALDTAHELPPQPVVFSKPPTAAVAVNDPIR.H<br>K.VTQLDWETELAVIGSTAR.G<br>K.NIFGIGLNYTEHVAESAR.A<br>R.AGQWIVSK.G<br>R.VTDTPELEAFYEELAR.N<br>R.SRVDTPELEAFYEELAR.N<br>R.TYEQFPHEKWSDFTTAAADVIER.F<br>R.LIGTDAASLDPEQSK.T<br>K.VTALEYFQEWYR.F<br>R.GFAIPAGHLER.D<br>R.EGGDYAAGER.K<br>K.VNDTHGDAGDR.V<br>R.HGGEFVMLFR.G<br>R.LEANLDAFHANTK.Q<br>R.KTDFPQITTSGGVADVFGYGDAR.A<br>R.AQSPQGITQK.W<br>R.AFENLLDR.H<br>K.HEASAGLAGLCLK.R<br>K.LIGLYWGGAMVGR.F<br>R.LQGEKHEASAGLAGLCLK.R<br>R.FIGSHLMR.F<br>R.LISSDKEGTAVVNPYR.K<br>R.DQVPEYTDYGR.S<br>R.GLLLPTAIFAR.W<br>R.DNAALAGMADKPVV.W<br>R.GGQIIDPHSAVGLAAAR.A<br>R.ALAGLDYETAVR.I<br>R.LGGDRPVPVSVPTGNFGDVFGYVAAQMGLPIAR.L<br>R.LVVATVNDLHRA<br>R.LLFDLAGR.D<br>R.IMRPFVSVLTEDELR.A |
| YP_616414 | Sala_1367 | PIIT protein-like protein                                        | 19.05%            | 2                       |                                                                                                                                                                                                                                                                                                                                                                                                                                                                                                                                                                                                                                                                                                                                                                                                                                                                                                                                                                                                                                                                                                                                                                                                                                                                                                                                                                                                                                                                                                                                                                                                                                                                                                                                                                                                                                                                                                                                                                                                                                                                                                                                                                                                                                                                                                                                                                                                                                                                                                                                                                                                                                                                                                                                                                                                                                                                                                                                                                                                                                                                                                                                                                                                                                                                                                                                                                                                                      |
| YP_616417 | Sala_1370 | Nucleotidyl transferase                                          | 45.27%            | 13                      |                                                                                                                                                                                                                                                                                                                                                                                                                                                                                                                                                                                                                                                                                                                                                                                                                                                                                                                                                                                                                                                                                                                                                                                                                                                                                                                                                                                                                                                                                                                                                                                                                                                                                                                                                                                                                                                                                                                                                                                                                                                                                                                                                                                                                                                                                                                                                                                                                                                                                                                                                                                                                                                                                                                                                                                                                                                                                                                                                                                                                                                                                                                                                                                                                                                                                                                                                                                                                      |
| YP_616421 | Sala_1374 | transcriptional regulator, MarR family                           | 35.81%            | 5                       |                                                                                                                                                                                                                                                                                                                                                                                                                                                                                                                                                                                                                                                                                                                                                                                                                                                                                                                                                                                                                                                                                                                                                                                                                                                                                                                                                                                                                                                                                                                                                                                                                                                                                                                                                                                                                                                                                                                                                                                                                                                                                                                                                                                                                                                                                                                                                                                                                                                                                                                                                                                                                                                                                                                                                                                                                                                                                                                                                                                                                                                                                                                                                                                                                                                                                                                                                                                                                      |
| YP_616422 | Sala_1375 | TonB-dependent receptor                                          | 26.28%            | 12                      |                                                                                                                                                                                                                                                                                                                                                                                                                                                                                                                                                                                                                                                                                                                                                                                                                                                                                                                                                                                                                                                                                                                                                                                                                                                                                                                                                                                                                                                                                                                                                                                                                                                                                                                                                                                                                                                                                                                                                                                                                                                                                                                                                                                                                                                                                                                                                                                                                                                                                                                                                                                                                                                                                                                                                                                                                                                                                                                                                                                                                                                                                                                                                                                                                                                                                                                                                                                                                      |
| YP_616423 | Sala_1376 | maleylacetoacetate isomerase                                     | 37.14%            | 7                       |                                                                                                                                                                                                                                                                                                                                                                                                                                                                                                                                                                                                                                                                                                                                                                                                                                                                                                                                                                                                                                                                                                                                                                                                                                                                                                                                                                                                                                                                                                                                                                                                                                                                                                                                                                                                                                                                                                                                                                                                                                                                                                                                                                                                                                                                                                                                                                                                                                                                                                                                                                                                                                                                                                                                                                                                                                                                                                                                                                                                                                                                                                                                                                                                                                                                                                                                                                                                                      |
| YP_616425 | Sala_1378 | hypothetical protein                                             | 31.00%            | 5                       |                                                                                                                                                                                                                                                                                                                                                                                                                                                                                                                                                                                                                                                                                                                                                                                                                                                                                                                                                                                                                                                                                                                                                                                                                                                                                                                                                                                                                                                                                                                                                                                                                                                                                                                                                                                                                                                                                                                                                                                                                                                                                                                                                                                                                                                                                                                                                                                                                                                                                                                                                                                                                                                                                                                                                                                                                                                                                                                                                                                                                                                                                                                                                                                                                                                                                                                                                                                                                      |
| YP_616427 | Sala_1380 | Aspartate racemase                                               | 48.28%            | 9                       |                                                                                                                                                                                                                                                                                                                                                                                                                                                                                                                                                                                                                                                                                                                                                                                                                                                                                                                                                                                                                                                                                                                                                                                                                                                                                                                                                                                                                                                                                                                                                                                                                                                                                                                                                                                                                                                                                                                                                                                                                                                                                                                                                                                                                                                                                                                                                                                                                                                                                                                                                                                                                                                                                                                                                                                                                                                                                                                                                                                                                                                                                                                                                                                                                                                                                                                                                                                                                      |
| YP_616428 | Sala_1381 | NAD(P) transhydrogenase, beta subunit                            | 16.23%            | 5                       |                                                                                                                                                                                                                                                                                                                                                                                                                                                                                                                                                                                                                                                                                                                                                                                                                                                                                                                                                                                                                                                                                                                                                                                                                                                                                                                                                                                                                                                                                                                                                                                                                                                                                                                                                                                                                                                                                                                                                                                                                                                                                                                                                                                                                                                                                                                                                                                                                                                                                                                                                                                                                                                                                                                                                                                                                                                                                                                                                                                                                                                                                                                                                                                                                                                                                                                                                                                                                      |
| YP_616430 | Sala_1383 | Nitrilase/cyanide hydratase and apolipoprotein N-acyltransferase | 55.33%            | 10                      |                                                                                                                                                                                                                                                                                                                                                                                                                                                                                                                                                                                                                                                                                                                                                                                                                                                                                                                                                                                                                                                                                                                                                                                                                                                                                                                                                                                                                                                                                                                                                                                                                                                                                                                                                                                                                                                                                                                                                                                                                                                                                                                                                                                                                                                                                                                                                                                                                                                                                                                                                                                                                                                                                                                                                                                                                                                                                                                                                                                                                                                                                                                                                                                                                                                                                                                                                                                                                      |
| YP_616432 | Sala_1385 | Asp/Glu racemase                                                 | 14.77%            | 3                       |                                                                                                                                                                                                                                                                                                                                                                                                                                                                                                                                                                                                                                                                                                                                                                                                                                                                                                                                                                                                                                                                                                                                                                                                                                                                                                                                                                                                                                                                                                                                                                                                                                                                                                                                                                                                                                                                                                                                                                                                                                                                                                                                                                                                                                                                                                                                                                                                                                                                                                                                                                                                                                                                                                                                                                                                                                                                                                                                                                                                                                                                                                                                                                                                                                                                                                                                                                                                                      |
| YP_616433 | Sala_1386 | 5-oxopent-3-ene-1,2,5-tricarboxylate decarboxylase               | 48.34%            | 9                       |                                                                                                                                                                                                                                                                                                                                                                                                                                                                                                                                                                                                                                                                                                                                                                                                                                                                                                                                                                                                                                                                                                                                                                                                                                                                                                                                                                                                                                                                                                                                                                                                                                                                                                                                                                                                                                                                                                                                                                                                                                                                                                                                                                                                                                                                                                                                                                                                                                                                                                                                                                                                                                                                                                                                                                                                                                                                                                                                                                                                                                                                                                                                                                                                                                                                                                                                                                                                                      |
| YP_616434 | Sala_1387 | Cupin 2, conserved barrel                                        | 5.01%             | 2                       |                                                                                                                                                                                                                                                                                                                                                                                                                                                                                                                                                                                                                                                                                                                                                                                                                                                                                                                                                                                                                                                                                                                                                                                                                                                                                                                                                                                                                                                                                                                                                                                                                                                                                                                                                                                                                                                                                                                                                                                                                                                                                                                                                                                                                                                                                                                                                                                                                                                                                                                                                                                                                                                                                                                                                                                                                                                                                                                                                                                                                                                                                                                                                                                                                                                                                                                                                                                                                      |
| YP_616437 | Sala_1390 | putative cyclase                                                 | 18.66%            | 2                       |                                                                                                                                                                                                                                                                                                                                                                                                                                                                                                                                                                                                                                                                                                                                                                                                                                                                                                                                                                                                                                                                                                                                                                                                                                                                                                                                                                                                                                                                                                                                                                                                                                                                                                                                                                                                                                                                                                                                                                                                                                                                                                                                                                                                                                                                                                                                                                                                                                                                                                                                                                                                                                                                                                                                                                                                                                                                                                                                                                                                                                                                                                                                                                                                                                                                                                                                                                                                                      |
| YP_616438 | Sala_1391 | tryptophan 2,3-dioxygenase                                       | 10.96%            | 3                       |                                                                                                                                                                                                                                                                                                                                                                                                                                                                                                                                                                                                                                                                                                                                                                                                                                                                                                                                                                                                                                                                                                                                                                                                                                                                                                                                                                                                                                                                                                                                                                                                                                                                                                                                                                                                                                                                                                                                                                                                                                                                                                                                                                                                                                                                                                                                                                                                                                                                                                                                                                                                                                                                                                                                                                                                                                                                                                                                                                                                                                                                                                                                                                                                                                                                                                                                                                                                                      |
| YP_616441 | Sala_1394 | diguanylate cyclase                                              | 21.76%            | 6                       |                                                                                                                                                                                                                                                                                                                                                                                                                                                                                                                                                                                                                                                                                                                                                                                                                                                                                                                                                                                                                                                                                                                                                                                                                                                                                                                                                                                                                                                                                                                                                                                                                                                                                                                                                                                                                                                                                                                                                                                                                                                                                                                                                                                                                                                                                                                                                                                                                                                                                                                                                                                                                                                                                                                                                                                                                                                                                                                                                                                                                                                                                                                                                                                                                                                                                                                                                                                                                      |
| YP_616442 | Sala_1395 | glucose/galactose transporter                                    | 9.28%             | 4                       |                                                                                                                                                                                                                                                                                                                                                                                                                                                                                                                                                                                                                                                                                                                                                                                                                                                                                                                                                                                                                                                                                                                                                                                                                                                                                                                                                                                                                                                                                                                                                                                                                                                                                                                                                                                                                                                                                                                                                                                                                                                                                                                                                                                                                                                                                                                                                                                                                                                                                                                                                                                                                                                                                                                                                                                                                                                                                                                                                                                                                                                                                                                                                                                                                                                                                                                                                                                                                      |
| YP_616443 | Sala_1396 | PRC-barrel                                                       | 22.95%            | 2                       |                                                                                                                                                                                                                                                                                                                                                                                                                                                                                                                                                                                                                                                                                                                                                                                                                                                                                                                                                                                                                                                                                                                                                                                                                                                                                                                                                                                                                                                                                                                                                                                                                                                                                                                                                                                                                                                                                                                                                                                                                                                                                                                                                                                                                                                                                                                                                                                                                                                                                                                                                                                                                                                                                                                                                                                                                                                                                                                                                                                                                                                                                                                                                                                                                                                                                                                                                                                                                      |
| YP_616444 | Sala_1397 | SAM-dependent methyltransferase                                  | 9.92%             | 2                       |                                                                                                                                                                                                                                                                                                                                                                                                                                                                                                                                                                                                                                                                                                                                                                                                                                                                                                                                                                                                                                                                                                                                                                                                                                                                                                                                                                                                                                                                                                                                                                                                                                                                                                                                                                                                                                                                                                                                                                                                                                                                                                                                                                                                                                                                                                                                                                                                                                                                                                                                                                                                                                                                                                                                                                                                                                                                                                                                                                                                                                                                                                                                                                                                                                                                                                                                                                                                                      |
| YP_616445 | Sala_1398 | threonine synthase                                               | 72.26%            | 23                      |                                                                                                                                                                                                                                                                                                                                                                                                                                                                                                                                                                                                                                                                                                                                                                                                                                                                                                                                                                                                                                                                                                                                                                                                                                                                                                                                                                                                                                                                                                                                                                                                                                                                                                                                                                                                                                                                                                                                                                                                                                                                                                                                                                                                                                                                                                                                                                                                                                                                                                                                                                                                                                                                                                                                                                                                                                                                                                                                                                                                                                                                                                                                                                                                                                                                                                                                                                                                                      |

| Accession | Locus tag | Description                                          | Sequence coverage | No. peptides identified | List of peptides identified                                                                                                                                                                                                                                                                                                                                                                                                                                                                                                                                                                                                                                                                                                                                                                                                                                                                                                                                                                                                                                                                                                                                                                                                                                                                                                                                                                                                                                                                                                                                                                                                                                                                                                                                                                                                                                                                                                                                                                                                                                                                                                                                                                                                                                                                                                                                                                                                                                                                                                                                                                                                                                                                                                                                                                                                                                                                                                                                                                                                                                                                                                                                                                                                                                                                                                                                                   |
|-----------|-----------|------------------------------------------------------|-------------------|-------------------------|-------------------------------------------------------------------------------------------------------------------------------------------------------------------------------------------------------------------------------------------------------------------------------------------------------------------------------------------------------------------------------------------------------------------------------------------------------------------------------------------------------------------------------------------------------------------------------------------------------------------------------------------------------------------------------------------------------------------------------------------------------------------------------------------------------------------------------------------------------------------------------------------------------------------------------------------------------------------------------------------------------------------------------------------------------------------------------------------------------------------------------------------------------------------------------------------------------------------------------------------------------------------------------------------------------------------------------------------------------------------------------------------------------------------------------------------------------------------------------------------------------------------------------------------------------------------------------------------------------------------------------------------------------------------------------------------------------------------------------------------------------------------------------------------------------------------------------------------------------------------------------------------------------------------------------------------------------------------------------------------------------------------------------------------------------------------------------------------------------------------------------------------------------------------------------------------------------------------------------------------------------------------------------------------------------------------------------------------------------------------------------------------------------------------------------------------------------------------------------------------------------------------------------------------------------------------------------------------------------------------------------------------------------------------------------------------------------------------------------------------------------------------------------------------------------------------------------------------------------------------------------------------------------------------------------------------------------------------------------------------------------------------------------------------------------------------------------------------------------------------------------------------------------------------------------------------------------------------------------------------------------------------------------------------------------------------------------------------------------------------------------|
|           |           |                                                      |                   |                         | R.IDGDAMALALR.W<br>R.AATLAGLASDGLLVPTKWPR.M<br>R.ALEIDAEIPVTLATAHPAK.F<br>K.AFLAEAAAR.G<br>R.QQVNLAVNSINWAR.L<br>R.YTKLPGDYDVVK.A<br>R.AMTIPADMLAGAR.D<br>R.FSHDAVTLVQLDHR.H<br>R.LTSGDYVAGVTPTATPSMDIQVSSNFER.L<br>R.LGNLFEER.E<br>R.HWLLLELPHGPTLAFK.D<br>R.EHIQIFMLHPEGR.V<br>R.DGAAIAGMMAEFAEK.A<br>R.KRFLGDEAAR.G<br>K.AFLAEAAAR.G<br>R.QMTTVALPNHNIADGSFDDAQAMVK.R<br>R.DGAAIAGMMAEFAEK.R<br>R.YDAAAAAAEPEILSQTISVR.F<br>R.LPWTFYFEPHTDVSIGAR.D<br>R.VTGGFGTTQR.Y<br>R.MPVLFVDPALVDDPDAR.D<br>K.AADNFWEGGATLEWTLSSPPHOFNELPR.I<br>R.LELEAFQYQLGGWAELMGGAGDEVAGK.H<br>K.LIVTGADVIHSFAVPAFWK.M<br>K.EQADAAGEPHQAVLAVNR.M<br>K.VTGYQWYWGAYPDQIGGEVSK.M<br>R.ANETTFTANK.V<br>R.SKGGNPNPQVETAATAATVSAPAAAIPAAK.N<br>R.LLAAQYEPK.K<br>R.LLAAQYEPK.K<br>K.GNPNPQVETAATAATVSAPAAAIPAAK.N<br>K.MLTKEQADAAGEPHQAVLAVNR.M<br>R.AAGGEVVAEALVDR.S<br>R.AADALQGHLLSSGR.H<br>K.VLWVEDVITGLSSR.E<br>.MTDDQILAEFR.A<br>R.SAGSNIDLVFPYPLVAINFFTYAADELPELAGTEAKPGSR.S<br>R.HSEYLLQCAR.V<br>.MTDDQILAEFR.A<br>K.VLWVEDVITGLSSR.E<br>K.QAIDLVSFPMGGVIGHEMGR.A<br>K.PAIFVERPTGTFELR.R<br>R.TTEGGDLAAGQHNHLAIPVAR.L<br>R.VSLFIEPDR.Q<br>R.LGVNIDHVATR.N<br>R.LRAPVVEFHTR.Y<br>R.IADAALASK.N<br>R.HIRDDDLAR.I<br>R.AAAIIVAVGGDGITAHLR.E<br>R.IADAALASK.N<br>R.IQAATDPLNLEMAATDEMVEIALR.H<br>R.IQAATDPLNLEMAATDEMVEIALR.H<br>R.AEISFSTIGTAK.W<br>R.GADGKELLEIPVR.E<br>R.LPERGDIVLEHLTR.V<br>R.ETLPGGASFDIDMGPYATDDYGPVVPANHLFMDNR.D<br>K.KLGGAVPFDAIAGR.A<br>K.LADGTVFDANEQPMQVAVQVPGFSEALTR.M<br>K.EGGSFPTKADVVLVK.Y<br>R.AVGPPIANSLHTITLTLDFR.S<br>R.IGFEVKEGSGSPSTK.A<br>K.ADVVLVK.Y<br>K.ADVVLVKYEGK.L<br>R.ITATGGVLSQAR.G<br>R.GLEGHFSAELQSIADTAHALGK.V<br>K.YGLTFAEALASATVAAAR.L<br>K.GTYLPTLMAFEGIR.E<br>R.IAPGMSADMIASGDPLSDVR.A<br>R.VITDATKPAQGPSTITITDDR.I<br>R.IDPPAGAEVVDLGDK.T<br>R.EAGSQYSAVALR.R<br>K.ALGVVAVGTDAAGVFEHGR.N<br>R.NGQEFALLVK.Y<br>R.LLSMENEIGR.I<br>R.GTANGFIEGPR.I<br>K.GIYPTVEDKVR.M<br>R.IVAGPALSIIIGHGSDVTGFR.E<br>R.ALESVDWVVR.G<br>R.NEAVDPDEWVVGVK.N<br>K.VMAHAHAGGGAASAAGDISIEHGTFADEAALK.V<br>R.VDTLGGWLSLLGR.V<br>R.QTTIDEADVTR.L<br>R.VGGPADPFDVWLAVDYR.Y<br>R.LADVAVYDEAGDR.A<br>R.DGDMIGDPLGWPALFR.R<br>R.IYLASAATLDIVR.D<br>R.VTETLDFQPAAGLDAIEPHWDRR.I<br>R.GAEIIGWLK.R<br>R.VTETLDFQPAAGLDAIEPHWDRR.R<br>R.GAEIIGWLKQK.L<br>R.GAEIIGWLKQK.L<br>K.SGWDVQVER.D<br>R.KGAGVPEALVALR.E<br>R.YYRAEDVALAER.I<br>K.DGAAPTSVAIATPTIGNDPAR.K<br>R.IHLLHQVGTVEGAR.K<br>K.ISGFTVLR.D<br>K.TGVEPILPR.R<br>R.INQIGLSR.N<br>R.HALVIGSETFSR.I<br>R.HIAEPDETATLGDAAAR.R<br>R.VDTSDEWIVER.T<br>R.HAVTNLAVALGEVNR.D<br>R.RALEAAGLQPADIGLIIVATATPDNTFPASATK.V<br>R.ALEAAGLQPADIGLIIVATATPDNTFPASATK.V<br>R.VVLTVDQHANTSAAVPLALDLAVR.D<br>R.DVGLSADDIDVVPHQANKR.I<br>R.VSNAELAEV.V<br>R.TTCVLFSDGAGAVLSAEDVADDRGVLATR.L<br>R.TRVSNELAEV.V<br>R.AASDIHTDGVVSGEDKPSQALR.K<br>R.FILVGEER.I<br>R.VALLNIGTEELK.G<br>K.AALDNHNPRL.A<br>K.IGFLISRPALEL.H<br>R.VALLNIGTEELKGTDEIRDAALLR.G<br>R.QVTEDLANFR.R<br>R.IAIDAMGGDVGVR.V<br>K.STSMGLAIDAVK.R<br>K.SHGSADAK.G<br>R.SHDSLVKAEAFQECPCNGELK.R<br>K.VEAQFQPCNGELK.R<br>R.GNHQQLDSITQK.L<br>K.AAFVDPGGDLK.L<br>R.AAIVPVTAQQNCTLLWCTETNK.A<br>R.ELGVPIEGHEDDRFWIER.F<br>R.SSSAEQVSSAGEVRL.L<br>R.SAGDQAEINPATASSANDNWTQR.G<br>R.SGDSHYADTEVDGANVR.M<br>K.LDANVEGDMTTLR.<br>R.AIFGWSAPALSAAER.A<br>R.WAPLLGGQWLPADR.A<br>R.LAPLADSAWTPR.F<br>R.DAPAEITQRD.<br>R.IVVLPVLESEADDKR.Q<br>R.WLAPADGEGDAAWR.A<br>R.QVIAYPDLGWSVEHR.R |
| YP_616449 | Sala_1402 | cytochrome c oxidase assembly protein CtaG/Cox11     | 36.02%            | 4                       |                                                                                                                                                                                                                                                                                                                                                                                                                                                                                                                                                                                                                                                                                                                                                                                                                                                                                                                                                                                                                                                                                                                                                                                                                                                                                                                                                                                                                                                                                                                                                                                                                                                                                                                                                                                                                                                                                                                                                                                                                                                                                                                                                                                                                                                                                                                                                                                                                                                                                                                                                                                                                                                                                                                                                                                                                                                                                                                                                                                                                                                                                                                                                                                                                                                                                                                                                                               |
| YP_616451 | Sala_1404 | Cytochrome-c oxidase                                 | 10.61%            | 2                       |                                                                                                                                                                                                                                                                                                                                                                                                                                                                                                                                                                                                                                                                                                                                                                                                                                                                                                                                                                                                                                                                                                                                                                                                                                                                                                                                                                                                                                                                                                                                                                                                                                                                                                                                                                                                                                                                                                                                                                                                                                                                                                                                                                                                                                                                                                                                                                                                                                                                                                                                                                                                                                                                                                                                                                                                                                                                                                                                                                                                                                                                                                                                                                                                                                                                                                                                                                               |
| YP_616452 | Sala_1405 | Cytochrome-c oxidase                                 | 34.40%            | 9                       |                                                                                                                                                                                                                                                                                                                                                                                                                                                                                                                                                                                                                                                                                                                                                                                                                                                                                                                                                                                                                                                                                                                                                                                                                                                                                                                                                                                                                                                                                                                                                                                                                                                                                                                                                                                                                                                                                                                                                                                                                                                                                                                                                                                                                                                                                                                                                                                                                                                                                                                                                                                                                                                                                                                                                                                                                                                                                                                                                                                                                                                                                                                                                                                                                                                                                                                                                                               |
| YP_616453 | Sala_1406 | orotate phosphoribosyltransferase                    | 75.00%            | 10                      |                                                                                                                                                                                                                                                                                                                                                                                                                                                                                                                                                                                                                                                                                                                                                                                                                                                                                                                                                                                                                                                                                                                                                                                                                                                                                                                                                                                                                                                                                                                                                                                                                                                                                                                                                                                                                                                                                                                                                                                                                                                                                                                                                                                                                                                                                                                                                                                                                                                                                                                                                                                                                                                                                                                                                                                                                                                                                                                                                                                                                                                                                                                                                                                                                                                                                                                                                                               |
| YP_616454 | Sala_1407 | pyridoxal phosphate biosynthetic protein PdxJ        | 47.58%            | 10                      |                                                                                                                                                                                                                                                                                                                                                                                                                                                                                                                                                                                                                                                                                                                                                                                                                                                                                                                                                                                                                                                                                                                                                                                                                                                                                                                                                                                                                                                                                                                                                                                                                                                                                                                                                                                                                                                                                                                                                                                                                                                                                                                                                                                                                                                                                                                                                                                                                                                                                                                                                                                                                                                                                                                                                                                                                                                                                                                                                                                                                                                                                                                                                                                                                                                                                                                                                                               |
| YP_616457 | Sala_1410 | Peptidase S26A, signal peptidase I                   | 34.89%            | 5                       |                                                                                                                                                                                                                                                                                                                                                                                                                                                                                                                                                                                                                                                                                                                                                                                                                                                                                                                                                                                                                                                                                                                                                                                                                                                                                                                                                                                                                                                                                                                                                                                                                                                                                                                                                                                                                                                                                                                                                                                                                                                                                                                                                                                                                                                                                                                                                                                                                                                                                                                                                                                                                                                                                                                                                                                                                                                                                                                                                                                                                                                                                                                                                                                                                                                                                                                                                                               |
| YP_616459 | Sala_1412 | peptidylprolyl isomerase, FKBP-type                  | 43.72%            | 7                       |                                                                                                                                                                                                                                                                                                                                                                                                                                                                                                                                                                                                                                                                                                                                                                                                                                                                                                                                                                                                                                                                                                                                                                                                                                                                                                                                                                                                                                                                                                                                                                                                                                                                                                                                                                                                                                                                                                                                                                                                                                                                                                                                                                                                                                                                                                                                                                                                                                                                                                                                                                                                                                                                                                                                                                                                                                                                                                                                                                                                                                                                                                                                                                                                                                                                                                                                                                               |
| YP_616460 | Sala_1413 | amidohydrolase                                       | 67.14%            | 17                      |                                                                                                                                                                                                                                                                                                                                                                                                                                                                                                                                                                                                                                                                                                                                                                                                                                                                                                                                                                                                                                                                                                                                                                                                                                                                                                                                                                                                                                                                                                                                                                                                                                                                                                                                                                                                                                                                                                                                                                                                                                                                                                                                                                                                                                                                                                                                                                                                                                                                                                                                                                                                                                                                                                                                                                                                                                                                                                                                                                                                                                                                                                                                                                                                                                                                                                                                                                               |
| YP_616461 | Sala_1414 | Helicase c2                                          | 8.00%             | 5                       |                                                                                                                                                                                                                                                                                                                                                                                                                                                                                                                                                                                                                                                                                                                                                                                                                                                                                                                                                                                                                                                                                                                                                                                                                                                                                                                                                                                                                                                                                                                                                                                                                                                                                                                                                                                                                                                                                                                                                                                                                                                                                                                                                                                                                                                                                                                                                                                                                                                                                                                                                                                                                                                                                                                                                                                                                                                                                                                                                                                                                                                                                                                                                                                                                                                                                                                                                                               |
| YP_616462 | Sala_1415 | putative phosphohistidine phosphatase, SixA          | 32.79%            | 7                       |                                                                                                                                                                                                                                                                                                                                                                                                                                                                                                                                                                                                                                                                                                                                                                                                                                                                                                                                                                                                                                                                                                                                                                                                                                                                                                                                                                                                                                                                                                                                                                                                                                                                                                                                                                                                                                                                                                                                                                                                                                                                                                                                                                                                                                                                                                                                                                                                                                                                                                                                                                                                                                                                                                                                                                                                                                                                                                                                                                                                                                                                                                                                                                                                                                                                                                                                                                               |
| YP_616463 | Sala_1416 | transcriptional regulator, MerR family               | 48.46%            | 4                       |                                                                                                                                                                                                                                                                                                                                                                                                                                                                                                                                                                                                                                                                                                                                                                                                                                                                                                                                                                                                                                                                                                                                                                                                                                                                                                                                                                                                                                                                                                                                                                                                                                                                                                                                                                                                                                                                                                                                                                                                                                                                                                                                                                                                                                                                                                                                                                                                                                                                                                                                                                                                                                                                                                                                                                                                                                                                                                                                                                                                                                                                                                                                                                                                                                                                                                                                                                               |
| YP_616464 | Sala_1417 | integration host factor, alpha subunit               | 29.90%            | 3                       |                                                                                                                                                                                                                                                                                                                                                                                                                                                                                                                                                                                                                                                                                                                                                                                                                                                                                                                                                                                                                                                                                                                                                                                                                                                                                                                                                                                                                                                                                                                                                                                                                                                                                                                                                                                                                                                                                                                                                                                                                                                                                                                                                                                                                                                                                                                                                                                                                                                                                                                                                                                                                                                                                                                                                                                                                                                                                                                                                                                                                                                                                                                                                                                                                                                                                                                                                                               |
| YP_616465 | Sala_1418 | 3-oxoacyl-(acyl-carrier-protein) synthase III        | 54.52%            | 11                      |                                                                                                                                                                                                                                                                                                                                                                                                                                                                                                                                                                                                                                                                                                                                                                                                                                                                                                                                                                                                                                                                                                                                                                                                                                                                                                                                                                                                                                                                                                                                                                                                                                                                                                                                                                                                                                                                                                                                                                                                                                                                                                                                                                                                                                                                                                                                                                                                                                                                                                                                                                                                                                                                                                                                                                                                                                                                                                                                                                                                                                                                                                                                                                                                                                                                                                                                                                               |
| YP_616466 | Sala_1419 | fatty acid/phospholipid synthesis protein PlsX       | 36.05%            | 10                      |                                                                                                                                                                                                                                                                                                                                                                                                                                                                                                                                                                                                                                                                                                                                                                                                                                                                                                                                                                                                                                                                                                                                                                                                                                                                                                                                                                                                                                                                                                                                                                                                                                                                                                                                                                                                                                                                                                                                                                                                                                                                                                                                                                                                                                                                                                                                                                                                                                                                                                                                                                                                                                                                                                                                                                                                                                                                                                                                                                                                                                                                                                                                                                                                                                                                                                                                                                               |
| YP_616467 | Sala_1420 | ribosomal protein L32                                | 33.90%            | 2                       |                                                                                                                                                                                                                                                                                                                                                                                                                                                                                                                                                                                                                                                                                                                                                                                                                                                                                                                                                                                                                                                                                                                                                                                                                                                                                                                                                                                                                                                                                                                                                                                                                                                                                                                                                                                                                                                                                                                                                                                                                                                                                                                                                                                                                                                                                                                                                                                                                                                                                                                                                                                                                                                                                                                                                                                                                                                                                                                                                                                                                                                                                                                                                                                                                                                                                                                                                                               |
| YP_616469 | Sala_1422 | beta-lactamase-like protein                          | 30.32%            | 4                       |                                                                                                                                                                                                                                                                                                                                                                                                                                                                                                                                                                                                                                                                                                                                                                                                                                                                                                                                                                                                                                                                                                                                                                                                                                                                                                                                                                                                                                                                                                                                                                                                                                                                                                                                                                                                                                                                                                                                                                                                                                                                                                                                                                                                                                                                                                                                                                                                                                                                                                                                                                                                                                                                                                                                                                                                                                                                                                                                                                                                                                                                                                                                                                                                                                                                                                                                                                               |
| YP_616471 | Sala_1424 | aspartyl protease-like protein                       | 37.50%            | 4                       |                                                                                                                                                                                                                                                                                                                                                                                                                                                                                                                                                                                                                                                                                                                                                                                                                                                                                                                                                                                                                                                                                                                                                                                                                                                                                                                                                                                                                                                                                                                                                                                                                                                                                                                                                                                                                                                                                                                                                                                                                                                                                                                                                                                                                                                                                                                                                                                                                                                                                                                                                                                                                                                                                                                                                                                                                                                                                                                                                                                                                                                                                                                                                                                                                                                                                                                                                                               |
| YP_616472 | Sala_1425 | hypothetical protein                                 | 25.46%            | 4                       |                                                                                                                                                                                                                                                                                                                                                                                                                                                                                                                                                                                                                                                                                                                                                                                                                                                                                                                                                                                                                                                                                                                                                                                                                                                                                                                                                                                                                                                                                                                                                                                                                                                                                                                                                                                                                                                                                                                                                                                                                                                                                                                                                                                                                                                                                                                                                                                                                                                                                                                                                                                                                                                                                                                                                                                                                                                                                                                                                                                                                                                                                                                                                                                                                                                                                                                                                                               |
| YP_616473 | Sala_1426 | glycine cleavage T protein (aminomethyl transferase) | 37.34%            | 5                       |                                                                                                                                                                                                                                                                                                                                                                                                                                                                                                                                                                                                                                                                                                                                                                                                                                                                                                                                                                                                                                                                                                                                                                                                                                                                                                                                                                                                                                                                                                                                                                                                                                                                                                                                                                                                                                                                                                                                                                                                                                                                                                                                                                                                                                                                                                                                                                                                                                                                                                                                                                                                                                                                                                                                                                                                                                                                                                                                                                                                                                                                                                                                                                                                                                                                                                                                                                               |

| Accession | Locus tag | Description                                                                  | Sequence coverage | No. peptides identified | List of peptides identified                                                                                                                                                                                                                                                                                                                                                                                                                                                                                                                                                                                                                                                                                                                                                                                                                                                                                                                                                                                                                                                                                                                                                                                                                                                                                                                                                                                                                                                                                                                                                                                                                                                                                                                                                                                                                                                                                                                                                                                                                                                                                                                                                                                                                                                                                                                                                                                                                                                                                                                                                                                                                                                                                                                                                                                                                |
|-----------|-----------|------------------------------------------------------------------------------|-------------------|-------------------------|--------------------------------------------------------------------------------------------------------------------------------------------------------------------------------------------------------------------------------------------------------------------------------------------------------------------------------------------------------------------------------------------------------------------------------------------------------------------------------------------------------------------------------------------------------------------------------------------------------------------------------------------------------------------------------------------------------------------------------------------------------------------------------------------------------------------------------------------------------------------------------------------------------------------------------------------------------------------------------------------------------------------------------------------------------------------------------------------------------------------------------------------------------------------------------------------------------------------------------------------------------------------------------------------------------------------------------------------------------------------------------------------------------------------------------------------------------------------------------------------------------------------------------------------------------------------------------------------------------------------------------------------------------------------------------------------------------------------------------------------------------------------------------------------------------------------------------------------------------------------------------------------------------------------------------------------------------------------------------------------------------------------------------------------------------------------------------------------------------------------------------------------------------------------------------------------------------------------------------------------------------------------------------------------------------------------------------------------------------------------------------------------------------------------------------------------------------------------------------------------------------------------------------------------------------------------------------------------------------------------------------------------------------------------------------------------------------------------------------------------------------------------------------------------------------------------------------------------|
| YP_616474 | Sala_1427 | dihydroorotase, homodimeric type                                             | 48.53%            | 11                      | R.RVEAIDVAAPQWMCALR.V<br>R.GFLQGLVTDVSGNLPVWAALLTPQK.A<br>R.ITAAVPADLDFTPFLVAVLTDATDADEIAR.G<br>R.FYGLNLEGVTLER.A<br>R.AIVMPLNSPPVTTAEGR.A<br>R.DGAMLAHVAPYAR.Q<br>K.LYPAHATTGSAHGVDVANIMGVLER.M<br>R.IGDVVPHAGETIGWR.L<br>R.DRTAAVPADLDFTPFLVAVLTDATDADEIAR.G<br>R.AEITVPRIGDVPVPHAGETIGWR.L<br>R.RPDDWHVHLR.D<br>R.GHAEGVTAAL.L<br>K.FFLGTDSPAHVHMK.E<br>R.LPAPFEDAPVEAWTQSAGAWR.V<br>R.LGATNSGPTR.L<br>R.GFSMFSVIER.A<br>R.LGPWEPDGVWPAPEIGYGV.R.A<br>R.RLGATNSGPTR.L<br>R.LGATNSGPTR.LPAPFEDAPVEAWTQSAGAWR.V<br>R.ASGEWWGR.L                                                                                                                                                                                                                                                                                                                                                                                                                                                                                                                                                                                                                                                                                                                                                                                                                                                                                                                                                                                                                                                                                                                                                                                                                                                                                                                                                                                                                                                                                                                                                                                                                                                                                                                                                                                                                                                                                                                                                                                                                                                                                                                                                                                                                                                                                                           |
| YP_616478 | Sala_1431 | Acetyltransferases including N-acetylases of ribosomal proteins-like protein | 43.17%            | 7                       | R.DAVIHMNLV.R.F<br>K.AAYPGDHPLAGQGTGAEAYR.H<br>R.HYGAOSGPFR.R<br>R.SDLALDDELASGDPAIK.A<br>K.AATAEAAAAALR.A<br>R.NAAGPGRNRPVDDGGVPLAASK.A<br>R.DGGMTDVLVLSGGK.<br>K.LTYGNWADR.L<br>R.EAAGVDSGK.C<br>K.GDLAYVLMR.R<br>K.GLANEAGNVK.Q<br>K.AKGLANEAGNVK.Q<br>K.VQGALGDKV.<br>K.GRYQSGALGDK.V<br>K.YKDFEQNAVAASGAIEIVTVAVR.R<br>R.YADPSSPLAGLI.<br>R.RYADPSSPLAGLI.<br>R.ETLDATVLAKE.E<br>K.QLEDAGAVIIMPLGAPIGSLGIQNR.V<br>R.EAGGVDLWLVLEGEAK.T<br>R.DAVLAGR.M<br>K.QLEDAGAVIIMPLGAPIGSLGIQNR.V<br>R.QTNHEGVLDLWLEAVSAGAK.A<br>R.LEAQADLGLR.V<br>R.SIKVPVIEVHLSDPAR.R<br>K.AHVHENSQVVEFDQPLFTIG.<br>R.NLTAAPAAVAVAPPPAAAPAAVAPATAAPAAVDFADAVK.S<br>R.ALAELDDTQLSEIEVEDGDR.K<br>R.ALAELDDTQLSEIEVEDGDR.V<br>K.SPMVGTVYAEPEGAPNFATIGSEVK.A<br>R.IQVEHPVTEMITGDLVR.E<br>K.TNPLHQALLADPDVINGDYTIK.W<br>K.VLEAASPTISAER.A<br>K.VVPDEDSLESIMQASSEAAAAAFDPTVYMEK.Y<br>R.VDSGLYAGSIPPYYDSMIGK.L<br>R.TVAVHSTADTDAMHVR.L<br>R.IAGGAGLSVK.Q<br>K.DSYLNIPIAISAAITGADAIHPGYGFLSENER.F<br>R.HIEFQVFDGK.G<br>R.ALEEWVJAGVK.T<br>K.GNAHLGER.D<br>R.RALEEMVIAGVK.T<br>K.WLEEWLAK.Q<br>R.IAGGAGLSVKQEELEFR.G<br>R.FAIEIEAHDMIFVGPKEHIR.T<br>R.TAVALLPLVPGSGAVTFGEETK.K<br>R.LADEAVICGPPAAK.D<br>K.WLEEWLAKQDAEESAA.<br>K.VTAVHPAGGMHVR.V<br>K.RTAVALGLPVPVPGSGAVTFGEETK.L<br>K.RTAVALGLPVPVPGSGAVTFGEETK.K<br>K.LDITLDTDTLLAHLR.D<br>R.SIINEGATIAI.R.N<br>R.DYNPDALAAAILANDQAK.L<br>R.YVWSNVPEYLTR.V<br>R.SPEEFGEAIASGK.T<br>R.VVHGGTVIATHK.A<br>R.LFGDQPPVYAVWTVVDPDGK.G<br>R.DAPVVASFAR.P<br>K.VGDEGLFAR.D<br>K.TAADAQAIR.V<br>R.AQGYTWTGSGK.T<br>K.STPTPQLNPMATGIIVNPNWTLPR.S<br>K.TLSVCKPSPINNALGVMK.M<br>R.ALHFSGLMAMVAFGR.S<br>R.AKTAADAQAIR.V<br>K.STPTPQLNPMATGIIVNPNWTLPR.S<br>K.MEMLNEHAIYLDHTPSK.N<br>R.QNFDAVDAIVK.A<br>K.VGIHAGLGLK.L<br>K.LRQNFDAVDAIVK.A<br>K.VGAEDLMEDMLAGNLDYGR.V<br>R.GVVTLPAGTGK.D<br>K.ALAAGADKVGAEMLMEDMLAGNLDYGR.V<br>R.VIATPDMMGIVGR.L<br>K.LGTVTPNVAEAVK.A<br>K.LHGVDEAIK.L<br>K.VALSMMGPGVK.V<br>R.KVALSSMGPGVK.V<br>R.GVVTLPAGTGKDVK.V<br>K.VDAQKLHGVDEAIK.L<br>K.VALSMMGPGVKVDTAELTGA.<br>K.GGQIEFRV.V<br>K.FDETLEIAMNLGVDPDR.H<br>K.ALEKVDAAK.L<br>K.GGQIEFR.V<br>R.VIATPDMMGIVGR.L<br>R.VIATPDMMGIVGR.L<br>R.KVALSSMGPGVK.V<br>R.ELATAKFDTELEIAMNLGVDPDR.H<br>K.VGAEDLMEDMLAGNLDYGR.V<br>K.VALSMMGPGVKVDTAELTGA.<br>K.VALSMMGPGVK.V<br>K.FDETLEIAMNLGVDPDR.H<br>K.ALAAGADKVGAEMLMEDMLAGNLDYGR.V<br>K.ALAAGADK.V<br>K.ALAAGADKVGAEMLMEDMLAGNLDYGR.V<br>K.LQVPAGTANPSPPLGALGQR.G<br>R.SKLAIEAIEK.M<br>K.GTPTPTIITVYADK.S<br>K.DLNANDIEQATK.I<br>K.LAEIAEIK.M<br>K.MKDLNANDIEQATK.I<br>K.GTPTPTIITVYADKSFVTK.T<br>K.TPATYLIK.A<br>K.SGSKEPK.I<br>R.IFGQVIAQALVAAR.T<br>R.LFDLEPVAGLEEFFPAFAKPTR.Q<br>R.QDGTLIASAMQEGLLR.I<br>R.LAAPIGDDPLLHR.A<br>R.SSRPSTEATAHYQWYR.L<br>R.LFDLEPVAGLEEFFPAFAK.P<br>R.GGDEAKPLHFR.V<br>K.AAHSUHYFLR.G<br>K.VTGLGSSGKPAISEAEAAR.I<br>R.ATPVLEDFEQUVER.M<br>K.VLEGPFASFNGVVEELDFDKAR.V |
| YP_616479 | Sala_1432 | hypothetical protein                                                         | 29.45%            | 3                       |                                                                                                                                                                                                                                                                                                                                                                                                                                                                                                                                                                                                                                                                                                                                                                                                                                                                                                                                                                                                                                                                                                                                                                                                                                                                                                                                                                                                                                                                                                                                                                                                                                                                                                                                                                                                                                                                                                                                                                                                                                                                                                                                                                                                                                                                                                                                                                                                                                                                                                                                                                                                                                                                                                                                                                                                                                            |
| YP_616480 | Sala_1433 | hypothetical protein                                                         | 38.15%            | 7                       |                                                                                                                                                                                                                                                                                                                                                                                                                                                                                                                                                                                                                                                                                                                                                                                                                                                                                                                                                                                                                                                                                                                                                                                                                                                                                                                                                                                                                                                                                                                                                                                                                                                                                                                                                                                                                                                                                                                                                                                                                                                                                                                                                                                                                                                                                                                                                                                                                                                                                                                                                                                                                                                                                                                                                                                                                                            |
| YP_616481 | Sala_1434 | CsbD-like protein                                                            | 53.33%            | 4                       |                                                                                                                                                                                                                                                                                                                                                                                                                                                                                                                                                                                                                                                                                                                                                                                                                                                                                                                                                                                                                                                                                                                                                                                                                                                                                                                                                                                                                                                                                                                                                                                                                                                                                                                                                                                                                                                                                                                                                                                                                                                                                                                                                                                                                                                                                                                                                                                                                                                                                                                                                                                                                                                                                                                                                                                                                                            |
| -         | Sala_1436 | thiamine biosynthesis protein                                                | 28.16%            | 8                       |                                                                                                                                                                                                                                                                                                                                                                                                                                                                                                                                                                                                                                                                                                                                                                                                                                                                                                                                                                                                                                                                                                                                                                                                                                                                                                                                                                                                                                                                                                                                                                                                                                                                                                                                                                                                                                                                                                                                                                                                                                                                                                                                                                                                                                                                                                                                                                                                                                                                                                                                                                                                                                                                                                                                                                                                                                            |
| YP_616483 | Sala_1437 | 3-dehydroquinate dehydratase                                                 | 32.88%            | 3                       |                                                                                                                                                                                                                                                                                                                                                                                                                                                                                                                                                                                                                                                                                                                                                                                                                                                                                                                                                                                                                                                                                                                                                                                                                                                                                                                                                                                                                                                                                                                                                                                                                                                                                                                                                                                                                                                                                                                                                                                                                                                                                                                                                                                                                                                                                                                                                                                                                                                                                                                                                                                                                                                                                                                                                                                                                                            |
| YP_616484 | Sala_1438 | acetyl-CoA carboxylase, biotin carboxyl carrier protein                      | 69.81%            | 5                       |                                                                                                                                                                                                                                                                                                                                                                                                                                                                                                                                                                                                                                                                                                                                                                                                                                                                                                                                                                                                                                                                                                                                                                                                                                                                                                                                                                                                                                                                                                                                                                                                                                                                                                                                                                                                                                                                                                                                                                                                                                                                                                                                                                                                                                                                                                                                                                                                                                                                                                                                                                                                                                                                                                                                                                                                                                            |
| YP_616485 | Sala_1439 | acetyl-CoA carboxylase, biotin carboxylase                                   | 65.42%            | 21                      |                                                                                                                                                                                                                                                                                                                                                                                                                                                                                                                                                                                                                                                                                                                                                                                                                                                                                                                                                                                                                                                                                                                                                                                                                                                                                                                                                                                                                                                                                                                                                                                                                                                                                                                                                                                                                                                                                                                                                                                                                                                                                                                                                                                                                                                                                                                                                                                                                                                                                                                                                                                                                                                                                                                                                                                                                                            |
| YP_616486 | Sala_1440 | hypothetical protein                                                         | 54.03%            | 17                      |                                                                                                                                                                                                                                                                                                                                                                                                                                                                                                                                                                                                                                                                                                                                                                                                                                                                                                                                                                                                                                                                                                                                                                                                                                                                                                                                                                                                                                                                                                                                                                                                                                                                                                                                                                                                                                                                                                                                                                                                                                                                                                                                                                                                                                                                                                                                                                                                                                                                                                                                                                                                                                                                                                                                                                                                                                            |
| YP_616487 | Sala_1441 | ribosomal protein L1                                                         | 78.02%            | 29                      |                                                                                                                                                                                                                                                                                                                                                                                                                                                                                                                                                                                                                                                                                                                                                                                                                                                                                                                                                                                                                                                                                                                                                                                                                                                                                                                                                                                                                                                                                                                                                                                                                                                                                                                                                                                                                                                                                                                                                                                                                                                                                                                                                                                                                                                                                                                                                                                                                                                                                                                                                                                                                                                                                                                                                                                                                                            |
| YP_616488 | Sala_1442 | ribosomal protein L11                                                        | 58.74%            | 9                       |                                                                                                                                                                                                                                                                                                                                                                                                                                                                                                                                                                                                                                                                                                                                                                                                                                                                                                                                                                                                                                                                                                                                                                                                                                                                                                                                                                                                                                                                                                                                                                                                                                                                                                                                                                                                                                                                                                                                                                                                                                                                                                                                                                                                                                                                                                                                                                                                                                                                                                                                                                                                                                                                                                                                                                                                                                            |
| YP_616489 | Sala_1443 | Palmitoyl-CoA hydrolase                                                      | 34.28%            | 8                       |                                                                                                                                                                                                                                                                                                                                                                                                                                                                                                                                                                                                                                                                                                                                                                                                                                                                                                                                                                                                                                                                                                                                                                                                                                                                                                                                                                                                                                                                                                                                                                                                                                                                                                                                                                                                                                                                                                                                                                                                                                                                                                                                                                                                                                                                                                                                                                                                                                                                                                                                                                                                                                                                                                                                                                                                                                            |
| YP_616490 | Sala_1444 | NusG antitermination factor                                                  | 89.33%            | 19                      |                                                                                                                                                                                                                                                                                                                                                                                                                                                                                                                                                                                                                                                                                                                                                                                                                                                                                                                                                                                                                                                                                                                                                                                                                                                                                                                                                                                                                                                                                                                                                                                                                                                                                                                                                                                                                                                                                                                                                                                                                                                                                                                                                                                                                                                                                                                                                                                                                                                                                                                                                                                                                                                                                                                                                                                                                                            |

| Accession | Locus tag | Description                                             | Sequence coverage | No. peptides identified | List of peptides identified                                                                                                                                                                                                                                                                                                                                                                                                                                                                                                                                                                                                                                                                                                                                                                                                                                                                                                                                                                                                                                                                                                                                                                                                                                                                                                                                                                                                                                                                                                                                                                                                                                                                                                                                                                                                                                                                                                                                                                                                                                                                                                                                                                                                                                                                                                                                                                                                                                                                                                                                                                                                                                                                                                                                                                                                                                                                                                                                                                                                                                                                                                                                                                                                                                                                                                                                |
|-----------|-----------|---------------------------------------------------------|-------------------|-------------------------|------------------------------------------------------------------------------------------------------------------------------------------------------------------------------------------------------------------------------------------------------------------------------------------------------------------------------------------------------------------------------------------------------------------------------------------------------------------------------------------------------------------------------------------------------------------------------------------------------------------------------------------------------------------------------------------------------------------------------------------------------------------------------------------------------------------------------------------------------------------------------------------------------------------------------------------------------------------------------------------------------------------------------------------------------------------------------------------------------------------------------------------------------------------------------------------------------------------------------------------------------------------------------------------------------------------------------------------------------------------------------------------------------------------------------------------------------------------------------------------------------------------------------------------------------------------------------------------------------------------------------------------------------------------------------------------------------------------------------------------------------------------------------------------------------------------------------------------------------------------------------------------------------------------------------------------------------------------------------------------------------------------------------------------------------------------------------------------------------------------------------------------------------------------------------------------------------------------------------------------------------------------------------------------------------------------------------------------------------------------------------------------------------------------------------------------------------------------------------------------------------------------------------------------------------------------------------------------------------------------------------------------------------------------------------------------------------------------------------------------------------------------------------------------------------------------------------------------------------------------------------------------------------------------------------------------------------------------------------------------------------------------------------------------------------------------------------------------------------------------------------------------------------------------------------------------------------------------------------------------------------------------------------------------------------------------------------------------------------------|
|           |           |                                                         |                   |                         | K.TEIRVDYEIGDQVK.V<br>R.VDYEIGDQVK.V<br>R.MGLTDFVEAVEVPVETVTEVKR.G<br>R.WYIHHAYSGFENK.V<br>K.VRDSVLAEAER.M<br>R.DSVLAEAER.M<br>K.LMTDDVYHLVK.N<br>R.MGLTDFVEAVEVPVETVTEVKR.R<br>K.VLEGFASFNGVVEELDFDK.A<br>R.KFFPGVYLA.L<br>K.PQISEAEAAAR.I<br>R.ILNSKEEAAAR.P<br>K.VSVSIFGR.A<br>R.MGLTDFVEAVEVPVETVTEVKR.G<br>R.ILNSKEEAAARPK.T<br>R.MGLTDFVEAVEVPVETVTEVKR.R<br>K.IGEFVNVQK.T<br>K.VKIGEFVNVQK.T<br>K.TEAGKIVWPTGR.E<br>R.SGGSLATLYDLFGNK.Q<br>R.WAAAGEADIDDPQAAK.L<br>R.NMILDAEALFLEHGHER.T<br>R.RYMHALLDAEALFLEHGHER.T<br>R.DIHLPALAEITELFTR.W<br>R.DRDFAAGIYR.D<br>R.RAETEGALVSAAGTLLTIEQIDR.V<br>R.TAEADVQAAQANLDSAR.L<br>R.VYVNFQSSSLLATR.R<br>R.ARPVNVIEFGR.V<br>R.AEFPNPNALLPGQFVR.A<br>R.AEVTGALVSAAGTLLTIEQIDR.V<br>R.YQPLLDQAIGR.Q<br>R.RLFDGFSFVR.A<br>R.LNLGYATVATPISGR.A<br>R.QEYDAVAAQR.T<br>R.LFDGFSFVR.A<br>K.LTADAASVMVLDTK.N<br>R.YQPLLDQAIGRQYDAVAAQR.T<br>R.ADGMILPQR.A<br>R.ARVDDIVGR.R<br>K.LGAMVAGQWAWLDCLPGRD.V<br>K.LASVGLSAAEALAAVQNSQTPGGQLGDQPIAK.G<br>R.ANPDGSAVTLADVGR.V<br>R.TGEGDSADAIAGR.A<br>K.LLANVRPEQEDAPVVK.L<br>K.AEWSAEPQLQR.Y<br>R.VLLQADAANR.M<br>K.GAQINAVITQGR.F<br>R.TGPGVFFDR.F<br>R.FTKPEQFESIILR.A<br>R.TTDYRQGGVVK.M<br>R.GLPVQYPSVAPPSTLITGVTPGADAR.T<br>R.LAEQLPPGFVETGTSYEEK.Q<br>K.SGNTDPMVNNFANTR.V<br>K.LIDIRIQR.A<br>K.EAFAPSLSPSPPELGTSSGFTFK.L<br>R.TRGPSTVGVGTDITTSR.Y<br>R.YLAEQVEAQR.G<br>R.SQYLATEAER.T<br>R.NLFAAEQTLIELR.R<br>R.QSETLLTQAEQLASL.L<br>R.GPSTVGVGTDITTSR.Y<br>R.DVASTYFASR.G<br>R.EDIAVAAYER.T<br>R.VSYGVGVTSFELDFWGR.V<br>R.REGVSTYLVDAER.N<br>R.LEMLIAQIAHNR.D<br>R.IQAADRLPTVGASADAAR.T<br>R.DLAVAVQIEEAR.G<br>R.RYLAEQVEAQR.G<br>R.GAEQQLAEATVASR.K<br>R.EVSTYLVDAER.N<br>K.NLLGQAVATIADAGTATPHFDRPTFVR.A<br>R.FGSAEFAIRFLTADPDR.A<br>R.HIADALHGALPGDYGATLDALR.A<br>R.AASEGLDALSIMER.V<br>K.KGDPALALIGVGHGAAVTLR.R<br>K.GDPAALALIGVGHGAAVTLR.R<br>R.NLTPGTGFADWALPEAR.K<br>K.LVLKAMVATGRITERQARAIRPR.I<br>R.AANPAVTGILPVQAWNR.A<br>R.AGSVTDLNNAGYGGVPAFK.L<br>K.GADELGLSNAQATALQR.V<br>R.TLIFGNSFTGSAHSAAR.N<br>K.GADELGLSNAQATALQRVAR.D<br>R.IAAHAANQDIGSTR.Q<br>R.DVTGDPVSTGDAYLASVR.Q<br>K.VALSFPVVEAFNLR.A<br>K.STPDAINPFGGPNANTQEQRWDR.V<br>R.YDFGANQPNNSLNFGVNIANDPVYAK.G<br>R.APVYADQAFDAYAVANPDAFR.Q<br>R.AFLGDSFPFETDFR.N<br>R.DILLVNRWPTDLGPR.F<br>R.DGASALYGSDATAGVNTLDDAFSR.N<br>R.LPGLNSTDVPAEGR.D<br>R.NTSTSPFGQFQVGSVNDGVFVGR.R<br>R.GLGTGNTLLLNGR.R<br>R.FIDTQETTYR.L<br>R.AAYSQGR.V<br>R.NGLFSSELGPQFNSVDKR.A<br>R.FGVEATYLNK.L<br>R.QIVNNAFATGIDR.V<br>R.AAQVQDSGLAFILVPSANVWNPFGAVGSPNR.L<br>R.VPNLQLNR.G<br>R.LGVNVFDSAPPLVDESLGYPEYHVSVKPR.E<br>R.NDLLAALQNPAGDFAEQLQVDR.V<br>R.ISNTNVGTTELMTADFR.V<br>R.LDGTTFDESNSVGSVDVGVSPTR.D<br>K.TLLVAELAK.S<br>R.LNLGTEDYR.R<br>R.GQFGSWDEGAVAMSGNR.T<br>R.GEGFINDTLQLAVR.G<br>R.FAINVDYWR.F<br>R.DVFSAFGALIPHR.G<br>R.VNLHGEYR.F<br>R.TEDTESNR.L<br>R.QSNPDLKNETETVVGATLDLTK.A<br>R.QQSSNPVVR.A<br>R.QGTTALTSSGVFHIQPCDFPGR.A<br>R.GTATFGWR.L<br>R.FEQTGVICAFGDQEQEALALDFLLR.Q<br>K.AFESNIFR.R<br>R.AGAQTAVEAQONAR.A<br>R.ATAPLRGPVALQSAIDGTLILLIGDR.L<br>K.GFRPGRPNVLPAGPAPETIATYGSDSLISVELGLK.A<br>R.LSQSQVPEFTDVR.Y<br>R.ERGLDQDFNAEPSTLPIAGLPLLVGATINSR.Y<br>R.DFGGFDISIGTGADIESINSK.S<br>K.TSLEAPANIPFGAAGTVIR.P<br>K.LVPLQLNQATPGFGR.L<br>R.HQGEFTYVLEGR.I<br>R.MSDFAEDEEDAPR.V<br>R.LTLPATNLGLPDR.G<br>R.VHLEGGEDVPPDQLDR.M<br>R.YVRDELELIPQAVYR.L<br>R.IVAVGVGDAK.S<br>R.GALKPGYADVVPDPATVADR.S |
| YP_616491 | Sala_1445 | SecE subunit of protein translocation complex           | 18.25%            | 3                       |                                                                                                                                                                                                                                                                                                                                                                                                                                                                                                                                                                                                                                                                                                                                                                                                                                                                                                                                                                                                                                                                                                                                                                                                                                                                                                                                                                                                                                                                                                                                                                                                                                                                                                                                                                                                                                                                                                                                                                                                                                                                                                                                                                                                                                                                                                                                                                                                                                                                                                                                                                                                                                                                                                                                                                                                                                                                                                                                                                                                                                                                                                                                                                                                                                                                                                                                                            |
| YP_616493 | Sala_1447 | transcriptional regulator, TetR family                  | 36.45%            | 6                       |                                                                                                                                                                                                                                                                                                                                                                                                                                                                                                                                                                                                                                                                                                                                                                                                                                                                                                                                                                                                                                                                                                                                                                                                                                                                                                                                                                                                                                                                                                                                                                                                                                                                                                                                                                                                                                                                                                                                                                                                                                                                                                                                                                                                                                                                                                                                                                                                                                                                                                                                                                                                                                                                                                                                                                                                                                                                                                                                                                                                                                                                                                                                                                                                                                                                                                                                                            |
| YP_616494 | Sala_1448 | secretion protein HlyD                                  | 50.27%            | 16                      |                                                                                                                                                                                                                                                                                                                                                                                                                                                                                                                                                                                                                                                                                                                                                                                                                                                                                                                                                                                                                                                                                                                                                                                                                                                                                                                                                                                                                                                                                                                                                                                                                                                                                                                                                                                                                                                                                                                                                                                                                                                                                                                                                                                                                                                                                                                                                                                                                                                                                                                                                                                                                                                                                                                                                                                                                                                                                                                                                                                                                                                                                                                                                                                                                                                                                                                                                            |
| YP_616495 | Sala_1449 | Hydrophobe/amphiphile efflux-1 HAE1                     | 23.24%            | 15                      |                                                                                                                                                                                                                                                                                                                                                                                                                                                                                                                                                                                                                                                                                                                                                                                                                                                                                                                                                                                                                                                                                                                                                                                                                                                                                                                                                                                                                                                                                                                                                                                                                                                                                                                                                                                                                                                                                                                                                                                                                                                                                                                                                                                                                                                                                                                                                                                                                                                                                                                                                                                                                                                                                                                                                                                                                                                                                                                                                                                                                                                                                                                                                                                                                                                                                                                                                            |
| YP_616496 | Sala_1450 | RND efflux system, outer membrane lipoprotein, NodT     | 38.64%            | 16                      |                                                                                                                                                                                                                                                                                                                                                                                                                                                                                                                                                                                                                                                                                                                                                                                                                                                                                                                                                                                                                                                                                                                                                                                                                                                                                                                                                                                                                                                                                                                                                                                                                                                                                                                                                                                                                                                                                                                                                                                                                                                                                                                                                                                                                                                                                                                                                                                                                                                                                                                                                                                                                                                                                                                                                                                                                                                                                                                                                                                                                                                                                                                                                                                                                                                                                                                                                            |
| YP_616497 | Sala_1451 | DNA alkylation repair enzyme-like protein               | 28.26%            | 6                       |                                                                                                                                                                                                                                                                                                                                                                                                                                                                                                                                                                                                                                                                                                                                                                                                                                                                                                                                                                                                                                                                                                                                                                                                                                                                                                                                                                                                                                                                                                                                                                                                                                                                                                                                                                                                                                                                                                                                                                                                                                                                                                                                                                                                                                                                                                                                                                                                                                                                                                                                                                                                                                                                                                                                                                                                                                                                                                                                                                                                                                                                                                                                                                                                                                                                                                                                                            |
| YP_616499 | Sala_1453 | Penicillin-binding protein 1A                           | 6.01%             | 2                       |                                                                                                                                                                                                                                                                                                                                                                                                                                                                                                                                                                                                                                                                                                                                                                                                                                                                                                                                                                                                                                                                                                                                                                                                                                                                                                                                                                                                                                                                                                                                                                                                                                                                                                                                                                                                                                                                                                                                                                                                                                                                                                                                                                                                                                                                                                                                                                                                                                                                                                                                                                                                                                                                                                                                                                                                                                                                                                                                                                                                                                                                                                                                                                                                                                                                                                                                                            |
| YP_616500 | Sala_1454 | hypothetical protein                                    | 23.60%            | 5                       |                                                                                                                                                                                                                                                                                                                                                                                                                                                                                                                                                                                                                                                                                                                                                                                                                                                                                                                                                                                                                                                                                                                                                                                                                                                                                                                                                                                                                                                                                                                                                                                                                                                                                                                                                                                                                                                                                                                                                                                                                                                                                                                                                                                                                                                                                                                                                                                                                                                                                                                                                                                                                                                                                                                                                                                                                                                                                                                                                                                                                                                                                                                                                                                                                                                                                                                                                            |
| YP_616501 | Sala_1455 | TonB-dependent receptor, plug                           | 59.23%            | 37                      |                                                                                                                                                                                                                                                                                                                                                                                                                                                                                                                                                                                                                                                                                                                                                                                                                                                                                                                                                                                                                                                                                                                                                                                                                                                                                                                                                                                                                                                                                                                                                                                                                                                                                                                                                                                                                                                                                                                                                                                                                                                                                                                                                                                                                                                                                                                                                                                                                                                                                                                                                                                                                                                                                                                                                                                                                                                                                                                                                                                                                                                                                                                                                                                                                                                                                                                                                            |
| YP_616503 | Sala_1457 | periplasmic sensor signal transduction histidine kinase | 6.15%             | 2                       |                                                                                                                                                                                                                                                                                                                                                                                                                                                                                                                                                                                                                                                                                                                                                                                                                                                                                                                                                                                                                                                                                                                                                                                                                                                                                                                                                                                                                                                                                                                                                                                                                                                                                                                                                                                                                                                                                                                                                                                                                                                                                                                                                                                                                                                                                                                                                                                                                                                                                                                                                                                                                                                                                                                                                                                                                                                                                                                                                                                                                                                                                                                                                                                                                                                                                                                                                            |
| YP_616509 | Sala_1463 | TonB-dependent receptor, plug                           | 17.27%            | 6                       |                                                                                                                                                                                                                                                                                                                                                                                                                                                                                                                                                                                                                                                                                                                                                                                                                                                                                                                                                                                                                                                                                                                                                                                                                                                                                                                                                                                                                                                                                                                                                                                                                                                                                                                                                                                                                                                                                                                                                                                                                                                                                                                                                                                                                                                                                                                                                                                                                                                                                                                                                                                                                                                                                                                                                                                                                                                                                                                                                                                                                                                                                                                                                                                                                                                                                                                                                            |
| YP_616512 | Sala_1466 | transcriptional regulator, XRE family                   | 13.11%            | 2                       |                                                                                                                                                                                                                                                                                                                                                                                                                                                                                                                                                                                                                                                                                                                                                                                                                                                                                                                                                                                                                                                                                                                                                                                                                                                                                                                                                                                                                                                                                                                                                                                                                                                                                                                                                                                                                                                                                                                                                                                                                                                                                                                                                                                                                                                                                                                                                                                                                                                                                                                                                                                                                                                                                                                                                                                                                                                                                                                                                                                                                                                                                                                                                                                                                                                                                                                                                            |
| YP_616513 | Sala_1467 | N-acyl-D-amino-acid deacylase                           | 53.63%            | 22                      |                                                                                                                                                                                                                                                                                                                                                                                                                                                                                                                                                                                                                                                                                                                                                                                                                                                                                                                                                                                                                                                                                                                                                                                                                                                                                                                                                                                                                                                                                                                                                                                                                                                                                                                                                                                                                                                                                                                                                                                                                                                                                                                                                                                                                                                                                                                                                                                                                                                                                                                                                                                                                                                                                                                                                                                                                                                                                                                                                                                                                                                                                                                                                                                                                                                                                                                                                            |

| Accession | Locus tag | Description                                                | Sequence coverage | No. peptides identified | List of peptides identified                                                                                                                                                                                                                                                                                                                                                                                                                                                                                                                                                                                                                                                                                                                                                                                                                                                                                                                                                                                                                                                                                                                                                                                                                                                                                                                                                                                                                                                                                                                                                                                                                                                                                                                                                                                                                                                                                                                                                                                                                                                                                                                                                                                                                                                                                                                                                                                                                                                                                                                                                                                                                                                                                                                                                                                                                                                                                                                                                                                                                                                                                                                                                                                                                                                                                                                    |
|-----------|-----------|------------------------------------------------------------|-------------------|-------------------------|------------------------------------------------------------------------------------------------------------------------------------------------------------------------------------------------------------------------------------------------------------------------------------------------------------------------------------------------------------------------------------------------------------------------------------------------------------------------------------------------------------------------------------------------------------------------------------------------------------------------------------------------------------------------------------------------------------------------------------------------------------------------------------------------------------------------------------------------------------------------------------------------------------------------------------------------------------------------------------------------------------------------------------------------------------------------------------------------------------------------------------------------------------------------------------------------------------------------------------------------------------------------------------------------------------------------------------------------------------------------------------------------------------------------------------------------------------------------------------------------------------------------------------------------------------------------------------------------------------------------------------------------------------------------------------------------------------------------------------------------------------------------------------------------------------------------------------------------------------------------------------------------------------------------------------------------------------------------------------------------------------------------------------------------------------------------------------------------------------------------------------------------------------------------------------------------------------------------------------------------------------------------------------------------------------------------------------------------------------------------------------------------------------------------------------------------------------------------------------------------------------------------------------------------------------------------------------------------------------------------------------------------------------------------------------------------------------------------------------------------------------------------------------------------------------------------------------------------------------------------------------------------------------------------------------------------------------------------------------------------------------------------------------------------------------------------------------------------------------------------------------------------------------------------------------------------------------------------------------------------------------------------------------------------------------------------------------------------|
|           |           |                                                            |                   |                         | R.GMAVAPGFNMLSWATESLIADPK.S<br>R.GISTNVASFVGAATVR.V<br>R.QIQLPWHFSGSAAASQATEGIFLK.S<br>K.DGHSATGR.A<br>K.APIVGDVAIKGDR.I<br>R.SNWDKLDIVK.K<br>R.SGAPAEIYHLK.M<br>R.SEGDRIEAEVDELIEISR.R<br>R.DWENLYGAGAK.M<br>R.DVFNVTQVLLK.D<br>K.YAIEWTNLGDYLGWLEKR.G<br>K.YAIEWTNLGDYLGWLEK.R<br>K.NDALKPLTKG.T<br>R.RSGAPAEIYHLK.M<br>R.MRALVR.Q<br>R.IITDMITYTAGATGLDAAMPTWVQAGGLEQWIER.L<br>R.DEELIPLQAVYR.L<br>K.VVANELEVAGGK.L<br>R.HHDLTALLWAQGYPR.R<br>.MFVATLIAAGK.L<br>R.VLEPIVDSR.A<br>R.LDATGHDVGAHWLDVGDADIVFHGSLVSAR.S<br>R.AMNGELDFR.A<br>K.IVPVDLAVIGDAGR.A<br>R.ALAALIAAWQDR.G<br>R.YSNSYSDSLPDFVK.L<br>R.HEQAATHAAEGYAR.S<br>R.QLVGLGAPITSTLMGLGAFPADDPK.W<br>R.IDTLGELGGIAR.M<br>K.LAEAYWGTGLR.I<br>R.ADLIVAVGAR.F<br>R.WLTSGGLTMYGYFPAVGAQIAHPNR.L<br>K.IFILNNEWGMV.R.Q<br>R.PGPVVIDIPK.N<br>K.HNVLVMDPDR.L<br>R.GRDPITTEVGHQMWAAQHFGFSAPNR.W<br>R.QWQELTYESR.Y<br>R.DLGEWWR.R<br>R.MIETPGVIVDCR.V<br>R.MIETPGVIVDCR.V<br>R.LGPMHEAFIATHGRPGVVIDIPK.N<br>R.LDAFSPDKK.I<br>R.WLTSGGLTMYGYFPAVGAQIAHPNR.L<br>R.LGPMHEAFIATHGR.P<br>K.KIHIDIDR.S<br>K.IFILNNEWGMV.R.Q<br>K.HNVLVMDPDR.L<br>R.GYNIESTVADISSDHLSR.I<br>K.VVDTLTSFIFEITGTSKVD.R.F<br>R.ITIVTNGPPPIIDQIAQLDR.L<br>K.VVDTLDAGETHVER.E<br>R.HVLATVONEAGVLAK.I<br>K.VVDTLTSFIFEITGTSK.V<br>R.TGVVAJAR.G<br>K.ITGLFTAR.G<br>R.AKVVDLTSFIFEITGTSKVD.R.F<br>K.VVDTLDAGETHVEREIALV.V<br>K.IKTEAGER.H<br>R.YSISNTAEYGDIK.T<br>R.VLADIQSGR.F<br>K.EVALALRPGSPTAK.K<br>R.FVKDFVLDNQAQGP.LK.A<br>K.DFVLDNQAQGP.LK.A<br>K.ALALSYASAVGGGR.S<br>K.AAAHPIEQTEK.L<br>K.LIVDLLYEGGIANMR.Y<br>R.KAAAHPIEQTEK.L<br>.MQVYDRDADQDLK.G<br>K.EAAAWADVIMIAAPDEHQAK.I<br>K.VAVVGYGSGQHAAQNMR.D<br>K.KAAAGFK.V<br>K.AAAHPIEQTEK.LR.A<br>K.RVLADIQSGR.F<br>R.IITEETK.E<br>R.YSISNTAEYGDIKTGR.I<br>R.DADQDLK.G<br>R.SGIETIFK.E<br>R.PDIDVFMVAPK.G<br>K.IVAEDIGPNM.P<br>R.DSGVKEVIALRPGSPTAK.K<br>.MQVYDRDADQDLK.G<br>K.VMSNKEAAAWADVIMIAAPDEHQAK.I<br>K.VAVVGYGSGQHAAQNMR.D<br>K.KNVLVDK.A<br>K.LIVDLLYEGGIANMR.Y<br>K.GGGVPCLIVAQEQSAAAGNGYAK.A<br>R.KAAAHPIEQTEK.LR.A<br>.MQVYDR.D<br>K.PGAALAFHGLNIHFLIEARPDIDVFMVAPK.G<br>K.KAVAVGYGSGQHAAQNMR.D<br>K.GPGHIVR.S<br>K.GGGVPCLIVAQEQSAAAGNGYAKALALSYASAVGGGR.S<br>K.EAAAWADVIMIAAPDEHQAK.I<br>R.LVPLGIPASGTQLPVIIGDNR.A<br>R.DFASNDYLGADSDVLR.A<br>R.AGHVAAAHNDQAQFEDIVR.W<br>R.GNHAHEALVHAAR.H<br>R.QAIEIVANEPEP.Q<br>K.DLAALATQSR.R<br>R.AALTAGIER.G<br>R.LQAAGFDIR.G<br>R.GIRPPTVAEGTAR.L<br>R.KDLAALATQSR.R<br>K.ALGAEGALLCAPIVR.D<br>R.PFFSTAPSMLMAWLV.R<br>R.HDAIFIVDEAHATGVFGGAGLSHGLTR.R<br>R.GDLVHDELIHASAHGMR.L<br>R.DNLVTLHTCGK.A<br>R.AGGGAGTPIVAESLYSMGDGR.A<br>R.LTPPPGELIVEGAGGALVPVTR.R<br>R.TSLGTINHSLLTIALK.R<br>R.ATGTPYKPVQSGLEETDSEIVAR.L<br>R.LPVVAPLTSENLAAAFGANFDIADF.R<br>R.TLYAELFAR.W<br>R.LVTPASPHIAEIDGVAIDIER.L<br>R.DVPIHGVTGDAVEDSEIADVSGVR.R<br>R.FVVTGTDTGIGK.T<br>R.DVPIHGVTGDAVEDSEIADVSGVRR.L<br>R.RTYAELFAR.W<br>R.LGRLPVVAPLTSENLAAAFGANFDIADF.R<br>R.TSLGTINHSLLTIALK.R<br>K.LDQIIFAGWTHEPAETLAAALVR.I<br>R.IDALAGAQAALALLS.H<br>K.NPSVWHFTQHLGEPILISHASGAR.L<br>K.MALGYWFNIGEAR.S<br>R.AQTEKLDQIIFAGWTHEPAETLAAALVR.I<br>R.RIGTIALDVTTPDSGYSNLAPR.L<br>R.IGTIALDVTTPDSGYSNLAPR.L<br>K.GQDFHGLGEIYSATPDNIAAVTENAR.K<br>R.FKQTEQFAAYLASK.G<br>K.QISLDFPAGTTEAASQLASR.F<br>R.NIQSTTNVSTEEVDLIVK.Q<br>R.IANNWVLPPEEQR.L<br>R.QFSEASTAVVGGDGLWVK.G<br>R.NQVFNLIIDEKIQEQAR.A<br>R.DMPETAPNLEQIEQK.L<br>R.NQVFNLIIDEK.L |
| YP_616514 | Sala_1468 | phosphoserine phosphatase SerB                             | 29.93%            | 6                       |                                                                                                                                                                                                                                                                                                                                                                                                                                                                                                                                                                                                                                                                                                                                                                                                                                                                                                                                                                                                                                                                                                                                                                                                                                                                                                                                                                                                                                                                                                                                                                                                                                                                                                                                                                                                                                                                                                                                                                                                                                                                                                                                                                                                                                                                                                                                                                                                                                                                                                                                                                                                                                                                                                                                                                                                                                                                                                                                                                                                                                                                                                                                                                                                                                                                                                                                                |
| YP_616516 | Sala_1470 | acetolactate synthase, large subunit, biosynthetic type    | 45.78%            | 24                      |                                                                                                                                                                                                                                                                                                                                                                                                                                                                                                                                                                                                                                                                                                                                                                                                                                                                                                                                                                                                                                                                                                                                                                                                                                                                                                                                                                                                                                                                                                                                                                                                                                                                                                                                                                                                                                                                                                                                                                                                                                                                                                                                                                                                                                                                                                                                                                                                                                                                                                                                                                                                                                                                                                                                                                                                                                                                                                                                                                                                                                                                                                                                                                                                                                                                                                                                                |
| YP_616517 | Sala_1471 | acetolactate synthase, small subunit                       | 72.67%            | 11                      |                                                                                                                                                                                                                                                                                                                                                                                                                                                                                                                                                                                                                                                                                                                                                                                                                                                                                                                                                                                                                                                                                                                                                                                                                                                                                                                                                                                                                                                                                                                                                                                                                                                                                                                                                                                                                                                                                                                                                                                                                                                                                                                                                                                                                                                                                                                                                                                                                                                                                                                                                                                                                                                                                                                                                                                                                                                                                                                                                                                                                                                                                                                                                                                                                                                                                                                                                |
| YP_616518 | Sala_1472 | ketol-acid reductoisomerase                                | 79.19%            | 35                      |                                                                                                                                                                                                                                                                                                                                                                                                                                                                                                                                                                                                                                                                                                                                                                                                                                                                                                                                                                                                                                                                                                                                                                                                                                                                                                                                                                                                                                                                                                                                                                                                                                                                                                                                                                                                                                                                                                                                                                                                                                                                                                                                                                                                                                                                                                                                                                                                                                                                                                                                                                                                                                                                                                                                                                                                                                                                                                                                                                                                                                                                                                                                                                                                                                                                                                                                                |
| YP_616519 | Sala_1473 | 8-amino-7-oxononanoate synthase                            | 64.12%            | 16                      |                                                                                                                                                                                                                                                                                                                                                                                                                                                                                                                                                                                                                                                                                                                                                                                                                                                                                                                                                                                                                                                                                                                                                                                                                                                                                                                                                                                                                                                                                                                                                                                                                                                                                                                                                                                                                                                                                                                                                                                                                                                                                                                                                                                                                                                                                                                                                                                                                                                                                                                                                                                                                                                                                                                                                                                                                                                                                                                                                                                                                                                                                                                                                                                                                                                                                                                                                |
| YP_616520 | Sala_1474 | dethiobiotin synthase                                      | 82.67%            | 12                      |                                                                                                                                                                                                                                                                                                                                                                                                                                                                                                                                                                                                                                                                                                                                                                                                                                                                                                                                                                                                                                                                                                                                                                                                                                                                                                                                                                                                                                                                                                                                                                                                                                                                                                                                                                                                                                                                                                                                                                                                                                                                                                                                                                                                                                                                                                                                                                                                                                                                                                                                                                                                                                                                                                                                                                                                                                                                                                                                                                                                                                                                                                                                                                                                                                                                                                                                                |
| YP_616521 | Sala_1475 | adenosylmethionine-8-amino-7-oxononanoate aminotransferase | 26.32%            | 7                       |                                                                                                                                                                                                                                                                                                                                                                                                                                                                                                                                                                                                                                                                                                                                                                                                                                                                                                                                                                                                                                                                                                                                                                                                                                                                                                                                                                                                                                                                                                                                                                                                                                                                                                                                                                                                                                                                                                                                                                                                                                                                                                                                                                                                                                                                                                                                                                                                                                                                                                                                                                                                                                                                                                                                                                                                                                                                                                                                                                                                                                                                                                                                                                                                                                                                                                                                                |
| YP_616522 | Sala_1476 | PpiC-type peptidyl-prolyl cis-trans isomerase              | 46.64%            | 16                      |                                                                                                                                                                                                                                                                                                                                                                                                                                                                                                                                                                                                                                                                                                                                                                                                                                                                                                                                                                                                                                                                                                                                                                                                                                                                                                                                                                                                                                                                                                                                                                                                                                                                                                                                                                                                                                                                                                                                                                                                                                                                                                                                                                                                                                                                                                                                                                                                                                                                                                                                                                                                                                                                                                                                                                                                                                                                                                                                                                                                                                                                                                                                                                                                                                                                                                                                                |



| Accession | Locus tag | Description                                     | Sequence coverage | No. peptides identified | List of peptides identified                                                                                                                                                                                                                                                                                                                                                                                                                                                                                                                                                                                                                                                                                                                                                                                                                                                                                                                                                                                                                                                                                                                                                                                                                                                                                                                                                                                                                                                                                                                                                                                                                                                                                                                                                                                                                                                                                                                                                                                                                                                                                                                                                                                                                                                                                                                                                                                                                                                                                                                                                                                                                                                                                                                                                                                                                                                                                                                                                                                                                                                                                                                                                              |
|-----------|-----------|-------------------------------------------------|-------------------|-------------------------|------------------------------------------------------------------------------------------------------------------------------------------------------------------------------------------------------------------------------------------------------------------------------------------------------------------------------------------------------------------------------------------------------------------------------------------------------------------------------------------------------------------------------------------------------------------------------------------------------------------------------------------------------------------------------------------------------------------------------------------------------------------------------------------------------------------------------------------------------------------------------------------------------------------------------------------------------------------------------------------------------------------------------------------------------------------------------------------------------------------------------------------------------------------------------------------------------------------------------------------------------------------------------------------------------------------------------------------------------------------------------------------------------------------------------------------------------------------------------------------------------------------------------------------------------------------------------------------------------------------------------------------------------------------------------------------------------------------------------------------------------------------------------------------------------------------------------------------------------------------------------------------------------------------------------------------------------------------------------------------------------------------------------------------------------------------------------------------------------------------------------------------------------------------------------------------------------------------------------------------------------------------------------------------------------------------------------------------------------------------------------------------------------------------------------------------------------------------------------------------------------------------------------------------------------------------------------------------------------------------------------------------------------------------------------------------------------------------------------------------------------------------------------------------------------------------------------------------------------------------------------------------------------------------------------------------------------------------------------------------------------------------------------------------------------------------------------------------------------------------------------------------------------------------------------------------|
| YP_616523 | Sala_1477 | 4-hydroxythreonine-4-phosphate dehydrogenase    | 55.46%            | 10                      | R.AADITIDENVVNEQFAR.L<br>K.IIQALQAGGSFAAYAR.Q<br>K.QTPEQFAAYLASK.G<br>R.TIAGGCAADAVAEIQLGASVWSR.D<br>R.KIIQALQAGGSFAAYAR.Q<br>R.IANNVLEPPEEQRLR.N<br>K.GQDFHLGELYSATPDNIAAVTENARK.I<br>R.NQASAAALVTSVSK.H<br>R.EQGLTVDPVAADALFAPGIR.D<br>R.TSPDHGTAFNIAJGTR.A<br>R.IALAGLNPHAGESGQLGDEELR.V<br>K.HALHGIGYTHPGQTEFIAER.C<br>R.VVPLTVHPLSEVPER.L<br>R.HEHDLPPVAIGDIAAVEAVWDGPIAR.V<br>R.DRYDALLCAYHDQALAPFK.A<br>R.ADPGPTIAAIAAAR.M<br>K.ALHFHDSVNLTLGLPIVR.T<br>R.VSVELETGKNG.V<br>R.VSVELETGK.N<br>R.LGIQAFEPVLEIGK.A<br>R.ITLLDDASGEAAR.Y<br>R.AIIQGGSTIASLGER.I<br>K.IAIVPEEGDPIEYLPK.S<br>K.EIGDVIDQVYR.H<br>R.FATSDLNDLYR.R<br>K.TLTEQVDEATGIAQR.V<br>R.VANQEHLIAPR.T<br>R.TTLEDVVDKDGHWIAPVGTLLDEATTQR.I<br>R.TAAEEHAEAAQGEAAIGDDPLGK.V<br>R.SFVSAASFQETTR.V<br>K.EVWDILDEVIR.E<br>R.VAELEFAR.I<br>R.VPQTDEKNEYLK.R<br>R.SLVKDFEQYQDGLITQKEK.Y<br>R.SGEIADISEGRER.A<br>R.IEEAEVQSK.I<br>K.VDSLQGLKENVIVGR.L<br>K.PSGEIIETPIISNFK.E<br>K.EGLTVLEFYNSTHGAR.K<br>K.DFEQQYQDGLITQKEK.Y<br>R.SVIVTPELK.L<br>K.SHTVPFDVNNR.L<br>R.KGLADTALK.T<br>R.IAEWDPTMPLITEK.Q<br>R.VLTEASVQK.V<br>R.SGEIADISEGR.E<br>K.RVDYSGR.S<br>R.KIAIVPEEGDPIEYLPK.S<br>R.GTPVNIIEAVGVIAAQSIGEPGTQLTMR.T<br>K.MALELFPFIYAR.L<br>R.TFHIGGAAQVNEQSNVEAISDGTIEYR.D<br>K.YQDLIDGK.T<br>K.IINDKHIEVIVR.Q<br>R.TLLENLDLEQER.T<br>K.TANSGLTR.R<br>R.TLLENLDLEQERTDLMEEELATTK.S<br>R.KEVWDILDEVIR.E<br>R.GLMAKPSGEIETPIISNFK.E<br>R.IGLLLDMQLK.Q<br>R.DMATIVDQR.G<br>K.KEIGDVIDQVYR.H<br>K.AGISFGKDDMIIPASK.E<br>R.MLQEAVALDFDNGR.R<br>R.MGHIELAAPVAHIWFLK.S<br>K.ETVLFADAIMALGFR.H<br>R.FRQNLGK.R<br>K.YQDLIDGKTLTEQVDEATGIAQR.V<br>K.VQGEDFTTDDVMEERPEGASEE.<br>K.VLEVQEGDMVK.R<br>R.VANQEHLIAPRTAAEEHAAELAQGEAAIGDDPLGK.V<br>R.MLQEAVALDFDNGR.R<br>R.DITGSLR.V<br>R.IEFVKDYK.A<br>K.RFETTPGR.M<br>K.PAEGRPVLLGITK.A<br>K.LPYGAQIMHK.D<br>K.KPETINVR.T<br>K.EVWDILDEVIREHPVLLNR.A<br>K.VDSLQGLK.E<br>K.EQLVDETR.S<br>R.TDLMEEELATTK.S<br>R.LIPAGTGAAMNR.V<br>K.VETIDGGDTLLPGEQDLYEMMEYNAK.L<br>K.VANAMMDEIR.A<br>K.PSGEIIETPIISNFKGLTVLEFYNSTHGAR.K<br>K.FQLTEDELDAQDEYGEDAFSAGIGAEAIR.T<br>R.VTASSKDAALR.A<br>R.VLMMSTNNILSPANGK.P<br>K.PIIVPSQDMVLGYYLSLER.E<br>K.ENIVIVGR.L<br>K.DNSVIAK.I<br>R.VRVITASSK.D<br>R.TLLENLDLEQERTDLMEEELATTK.S<br>R.TDLMEEELATTK.S<br>R.SPLVCEATLGVCGK.C<br>R.SLVKDFEQYQDGLITQKEKYNK.A<br>R.SKKEDELQPR.I<br>R.RIALSR.S<br>R.MLQEAVALDFDNGR.R<br>R.MLQEAVALDFDNGR.R<br>R.MLIGECPLK.S<br>R.MGHIELAAPVAHIWFLK.S<br>R.LVDVSDQCVIEEDCGTTR.G<br>R.IGLLLDMQLK.Q<br>R.IFGPIKDYECLGK.Y<br>R.IAEWDPTMPLITEK.Q<br>R.GTPVNIIEAVGVIAAQSIGEPGTQLTMR.T<br>R.GLMAKPSGEIETPIISNFK.E<br>R.EHPVLLNR.A<br>R.EGEPGEMLLADMAEVHQLHIGAVTLHSK.I<br>R.DMATIVDQR.G<br>K.VQGEDFTTDDVMEERPEGASEE.<br>K.VLEVQEGDMVK.R<br>K.NGKPAEGRPVLLGITK.A<br>K.MALELFPFIYAR.L<br>K.LPYGAQIMHK.D<br>K.IGIASPER.I<br>K.ETVLFADAIMALGFR.H<br>K.CGVEVTVTK.V<br>K.AIDAWSQCGDK.V<br>R.VIEYR.A<br>R.VSREASK.T<br>R.VINRNNR.L<br>R.TITGANK.R<br>R.SWSFGEIKKPETINVR.T<br>R.RLVDSQDCVIEEDCGTTR.G<br>R.IPKDNSVIAK.I<br>R.FETTPGR.M<br>K.SKLVLEVQEGDMVK.R<br>K.IRSPLVCEATLGVCGK.C<br>K.IAIVPEEGDPIEYLPKSK.V<br>K.HIEVIVR.Q<br>K.EIGDVIDQVYRHTQKE.E<br>K.AGISFGKDDMIIPASK.E<br>R.VSALGPGGLTR.E<br>R.SIGFVSLVTVQPLGGK.A<br>R.DAEGIEELASNLK.V |
| YP_616526 | Sala_1480 | cold-shock DNA-binding domain protein           | 13.33%            | 2                       |                                                                                                                                                                                                                                                                                                                                                                                                                                                                                                                                                                                                                                                                                                                                                                                                                                                                                                                                                                                                                                                                                                                                                                                                                                                                                                                                                                                                                                                                                                                                                                                                                                                                                                                                                                                                                                                                                                                                                                                                                                                                                                                                                                                                                                                                                                                                                                                                                                                                                                                                                                                                                                                                                                                                                                                                                                                                                                                                                                                                                                                                                                                                                                                          |
| YP_616531 | Sala_1485 | DNA-directed RNA polymerase, subunit beta-prime | 74.35%            | 115                     |                                                                                                                                                                                                                                                                                                                                                                                                                                                                                                                                                                                                                                                                                                                                                                                                                                                                                                                                                                                                                                                                                                                                                                                                                                                                                                                                                                                                                                                                                                                                                                                                                                                                                                                                                                                                                                                                                                                                                                                                                                                                                                                                                                                                                                                                                                                                                                                                                                                                                                                                                                                                                                                                                                                                                                                                                                                                                                                                                                                                                                                                                                                                                                                          |
| YP_616532 | Sala_1486 | DNA-directed RNA polymerase, beta subunit       | 85.27%            | 142                     |                                                                                                                                                                                                                                                                                                                                                                                                                                                                                                                                                                                                                                                                                                                                                                                                                                                                                                                                                                                                                                                                                                                                                                                                                                                                                                                                                                                                                                                                                                                                                                                                                                                                                                                                                                                                                                                                                                                                                                                                                                                                                                                                                                                                                                                                                                                                                                                                                                                                                                                                                                                                                                                                                                                                                                                                                                                                                                                                                                                                                                                                                                                                                                                          |

| Accession | Locus tag | Description | Sequence coverage | No. peptides identified | List of peptides identified                                                                                                                                                                                                                                                                                                                                                                                                                                                                                                                                                                                                                                                                                                                                                                                                                                                                                                                                                                                                                                                                                                                                                                                                                                                                                                                                                                                                                                                                                                                                                                                                                                                                                                                                                                                                                                                                                                                                                                                                                                                                                                                                                                                                                                                                                                                                                                                                                                                                                                                                                                                                                                                                                                                                                                                                                                                                                                                                                                                                                                                                                                                                                                                                                                                                                                    |
|-----------|-----------|-------------|-------------------|-------------------------|--------------------------------------------------------------------------------------------------------------------------------------------------------------------------------------------------------------------------------------------------------------------------------------------------------------------------------------------------------------------------------------------------------------------------------------------------------------------------------------------------------------------------------------------------------------------------------------------------------------------------------------------------------------------------------------------------------------------------------------------------------------------------------------------------------------------------------------------------------------------------------------------------------------------------------------------------------------------------------------------------------------------------------------------------------------------------------------------------------------------------------------------------------------------------------------------------------------------------------------------------------------------------------------------------------------------------------------------------------------------------------------------------------------------------------------------------------------------------------------------------------------------------------------------------------------------------------------------------------------------------------------------------------------------------------------------------------------------------------------------------------------------------------------------------------------------------------------------------------------------------------------------------------------------------------------------------------------------------------------------------------------------------------------------------------------------------------------------------------------------------------------------------------------------------------------------------------------------------------------------------------------------------------------------------------------------------------------------------------------------------------------------------------------------------------------------------------------------------------------------------------------------------------------------------------------------------------------------------------------------------------------------------------------------------------------------------------------------------------------------------------------------------------------------------------------------------------------------------------------------------------------------------------------------------------------------------------------------------------------------------------------------------------------------------------------------------------------------------------------------------------------------------------------------------------------------------------------------------------------------------------------------------------------------------------------------------------|
|           |           |             |                   |                         | R.ATFSSLKDLLVGGQATSAPVK.G<br>R.AGDIADGSPSTELGELALGK.N<br>K.QLVSAASLIPFLNDDANR.A<br>K.DGLDTLLIPTEIFGR.Y<br>R.SVGELLENQYR.V<br>R.SRDAEGIIELASNLK.V<br>R.RGGVIDQVDATR.I<br>R.LGLDAEDVTTLR.S<br>R.SDPISIGYVSGLEK.T<br>R.I.LPVEDMPFLEDGTPVDIVLNPLGVPSR.M<br>R.GSKPAFDVVDK.T<br>K.TGEVFAAGHK.I<br>R.LKQDADDER.A<br>K.VGVFATPVFDGAK.E<br>K.LAVVDDKAQTALAEIK.A<br>K.HTYAQANADLNPDGSDDELISAR.E<br>R.HGIDKDER.A<br>R.DSGAAIAAR.R<br>R.ETAELFAGLFFDPERYDLSAVGR.V<br>R.DFAGTAEALDFVHYELEAPK.Y<br>K.GDDTFAAGIPESFNVLK.E<br>R.SEDLAVVK.E<br>R.NLDEAGIYVYGAEVGPGDILAGK.I<br>R.LPPGVSGTVVEVR.V<br>R.GDELAPVVK.M<br>R.ETAELFAGLFFDPER.Y<br>R.EFFGSSQLSQFMDQTNPLSEVTHK.R<br>K.LVLLDIDHNTGPIWR.N<br>K.DLLVGGQATSAPVK.G<br>R.SPGVLFHDR.G<br>R.MNVGQILETHLGWASR.G<br>R.EKLEHVYGAEVYEDIR.S<br>K.SVGGALEATATK.I<br>K.SVGGALEATATK.R<br>K.LQKQDELAPVVK.M<br>K.LEHVYGAEVYEDIR.S<br>K.EADVSNMLTAGLDESGQSDLYDGR.T<br>K.AEDRDQALSIDIYR.V<br>R.DTSLRLPPGVSGTVVEVR.V<br>R.AEAPVGTGMEETVAR.D<br>K.KGDIVTEEMLVGLDR.A<br>R.LGLDAEDVTTLRSEDILAVVK.E<br>R.AIAIEREIER.L<br>K.YGFIETPYR.R<br>R.LIVFEVSDTDR.S<br>R.GSWLDFEADK.D<br>K.LDAAGIDKLLLDIDHNTGPIWR.N<br>K.AQYDDAIK.I<br>R.IVKDDVFTSIHIEEFVTAR.D<br>R.GGVLDQVDATR.I<br>R.EQITLMDVSPK.Q<br>K.LHHLVDDKIHAR.S<br>K.DGKGEIDIDNLGNR.R<br>R.TGDKFDR.K<br>R.YSAYDLINESTGEIYIAGDEVAENLEK.L<br>K.VYEIVKGGDTFAAGIPESFNVLK.E<br>R.SPGVLFHDRGK.T<br>R.DANPDATGGEMPEAVR.E<br>K.VTNEVYLSAMEESK.H<br>K.AAKDGLDTLLIPTEIFGR.Y<br>R.YDLSAVGR.V<br>K.VPFVENVWR.G<br>K.LFGNIHEAVEMPNLIEVQR.E<br>R.SVFFIRDFAGTAEALDFVHYELEAPK.Y<br>R.MSSVDSVTVMPNDLINAKPAVAARV.E<br>R.EFFGSSQLSQFMDQTNPLSEVTHKR.R<br>K.VTVGYIYMLK.L<br>K.GDIVTEEMLVGLDR.A<br>R.RVLSALGPGGLTR.E<br>R.GLGGQVTR.A<br>R.EAGEFLMAPR.E<br>R.LDQALSIDIYR.V<br>R.ATDMVEPGK.S<br>R.DIPNVGEEALR.N<br>R.KLFGNIHEAVEMPNLIEVQR.E<br>K.LHHLVDDK.I<br>R.TKYVEIVK.G<br>K.LDAAGIDK.L<br>K.GEIDDIDNLGNR.R<br>K.DIVNVR.I<br>R.KVTGVYIYMLK.L<br>R.KLQGDGK.M<br>K.YEDRVEK.L<br>K.SSVDIYR.LL<br>K.PAFDVVDK.T<br>R.YSAYDLINESTGEIYIAGDEVAENLEK.LDAAGIDK.L<br>R.TKYVEIVKGGDTFAAGIPESFNVLK.E<br>R.SVLDIKEQVYMGDPLMTENGTFVNGTER.V<br>R.SNQTICINQR.P<br>R.SNQTICINQR.P<br>R.MNVGQILETHLGWASR.G<br>R.KLFGNIHEAVEMPNLIEVQR.E<br>R.I.LPVEDMPFLEDGTPVDIVLNPLGVPSR.M<br>R.ICPIETPEGPNIGLINSLATFAR.V<br>R.HGNKGVISR.I<br>R.GITTAAPK.V<br>R.EFFGSSQLSQFMDQTNPLSEVTHK.R<br>R.DVHPHYGR.I<br>R.DANPDATGGEMPEAVR.E<br>R.ATDMVEPGKSGVDIYR.L<br>R.ALEEWDRDANPDATGGEMPEAVR.E<br>R.ALEEWDRDANPDATGGEMPEAVR.E<br>R.AEAPVGTGMEETVAR.D<br>K.YGFIETPYR.R<br>K.VTVGYIYMLK.L<br>K.VTNEVYLSAMEESK.H<br>K.LPVTSLYALGMTGEEILNHFYDR.L<br>K.LFGNIHEAVEMPNLIEVQR.E<br>K.ELVNLKDKGGEIDDIDNLGNR.V<br>K.ELVNLKDKGGEIDDIDNLGNR.R<br>K.ELVNLKDKG.G<br>K.EADVSNMLTAGLDESGQSDLYDGR.T<br>K.ADKAEDRDQALSIDIYR.V<br>R.SIGPYSVLTQQPLGGKAQFGGQR.F<br>R.MSSVDSVTVMPNDLINAKPAVAARV.E<br>R.MSSVDSVTVMPNDLINAK.P<br>R.LQKFOR.S<br>R.LGPEITRIDIPNVGEEALR.N<br>R.LGPEITR.D<br>R.LANKAAK.D<br>R.KVTGVYIYMLK.L<br>R.KLPVTSLLYALGMTGEEILNHFYDR.L<br>R.GSWLDFEADKDIVNVR.I<br>R.FGEMEWALQAYGAAYTLQEMLVK.S<br>R.ESYEQFLR.S<br>R.EFFGSSQLSQFMDQTNPLSEVTHKR.R<br>R.EAGEFLMAPR.E<br>R.DIPNVGEEALRNLDEAGIYVYGAEVGPGDILAGK.I<br>R.AENGWVVPFVENVWR.G<br>K.VYEIVK.G<br>K.SDDVIGR.T<br>K.NVLVAFMPWNGYNYEDSILISER.I<br>K.LPVTSLYALGMTGEEILNHFYDR.L<br>K.LAVVDDKAQTALAEIKAQYDDAIK.R.I<br>K.KGDIVTEEMLVGLDR.A<br>K.EQDVYMGDPLMTENGTFVNGTER.V<br>K.ELVNLK.D |

| Accession | Locus tag | Description                                    | Sequence coverage | No. peptides identified | List of peptides identified                                                                                                                                                                                                                                                                                                                                                                                                                                                                                                                                                                                                                                                                                                                                                                                                                                                                                                                                                                                                                                                                                                                                                                                                                                                                                                                                                                                                                                                                                                                                                                                                                                                                                                                                                                                                                                                                                                                                                                                                                                                                                                                                                                                                                                                                                                                                                                                                                                                                                                                                                                                                                                                                                                                                                                                                                                                                                                                                                                                                                                                                                                                                                                                                                                                                                                                                                                                                                                                                                       |
|-----------|-----------|------------------------------------------------|-------------------|-------------------------|-------------------------------------------------------------------------------------------------------------------------------------------------------------------------------------------------------------------------------------------------------------------------------------------------------------------------------------------------------------------------------------------------------------------------------------------------------------------------------------------------------------------------------------------------------------------------------------------------------------------------------------------------------------------------------------------------------------------------------------------------------------------------------------------------------------------------------------------------------------------------------------------------------------------------------------------------------------------------------------------------------------------------------------------------------------------------------------------------------------------------------------------------------------------------------------------------------------------------------------------------------------------------------------------------------------------------------------------------------------------------------------------------------------------------------------------------------------------------------------------------------------------------------------------------------------------------------------------------------------------------------------------------------------------------------------------------------------------------------------------------------------------------------------------------------------------------------------------------------------------------------------------------------------------------------------------------------------------------------------------------------------------------------------------------------------------------------------------------------------------------------------------------------------------------------------------------------------------------------------------------------------------------------------------------------------------------------------------------------------------------------------------------------------------------------------------------------------------------------------------------------------------------------------------------------------------------------------------------------------------------------------------------------------------------------------------------------------------------------------------------------------------------------------------------------------------------------------------------------------------------------------------------------------------------------------------------------------------------------------------------------------------------------------------------------------------------------------------------------------------------------------------------------------------------------------------------------------------------------------------------------------------------------------------------------------------------------------------------------------------------------------------------------------------------------------------------------------------------------------------------------------------|
| YP_616535 | Sala_1489 | hypothetical protein                           | 16.11%            | 2                       | K.DGKGEIDIDNLGNRR.V<br>K.ASDVRDTSRL.L<br>R.ELIIGDIEQDSALLASEDNDFLR.M<br>K.ANPVGEIWL.R.S<br>R.NILGNVISDAVDAASK.A<br>R.GEEVGATANWSETRPNVSGSSTVASINDER.G<br>R.ITLADPIELPFVETEA.A<br>R.DGGYQLALPPVDISYGDVLR.L<br>K.VRDETASILDR.I<br>K.FLTVLSEMAR.E<br>R.FYDLTKDDPVCINCIGYSWIPESVLK.S<br>K.DDPVCINCIGYSWIPESVLK.S<br>K.SAILLAGLNTGPVTEVIEVPTR.D<br>K.APVTVDDIAPVATSPFNFEALLAGLQQ.<br>K.GIEVDPAVAPSMIDIEFVLFVAATLAEGR.T<br>R.IHGVGVGGLQPR.G<br>R.GALDMGNSGTSTR.L<br>R.VIDPLTQMADISASPGAR.G<br>R.VEESQDGLVIDGTGGDPLAGGATIAGHLDR.I<br>R.AGLVEVLK.A<br>R.RDDGEWR.I<br>R.VAGLLEGHDLATAAAMR.A<br>R.TVTGTLDELKVESDR.L<br>R.TVTTGLDEL.V<br>R.GLAPAIPLSYR.L<br>R.GALDMGNSGTSTR.L<br>R.LLMGLVASHPIATFVGDASLSGR.P<br>R.EIGGEPVADLR.V<br>R.QLADHGLPLVDIGLLYR.A<br>R.AVGYQTLNHGDPDR.A<br>R.YESTGGLASR.V<br>R.QVDFANQGGAVLDGR.D<br>R.DIGTVIAPHADAK.I<br>K.IFVITATPEER.A<br>R.GIDVTYDVALADIHAR.D<br>R.EAALAAIAFVERR.L.E<br>R.AADAMLLDNTNIDREALAAIAFVER.R<br>R.SGLIQLLEEGQIEGAVK.N<br>R.DVGLMDLPQPFQILK.M<br>R.WNHPSIENIGDITVK.V<br>K.GTVAIENDLAVIDIGLK.S<br>K.QAQSNPWGAFEAHPVSGVIEGEVK.N<br>K.EAVAQYSSDSGASLDILGEALK.A<br>K.QLESDPWEVAAK.Y<br>K.FDAMVVGFR.S<br>R.DNGLVQAGESVGTGFKR<br>K.GGFTVDLGGAVAFPLPSQVDIRPVR.D<br>K.AMQIAEKEAVAQYSSDSGASLDILGEALK.A<br>K.GAPAVGGGMAAGSLK.K<br>R.DNGLVQAGESVGTGFKR.A<br>K.NDVVTVSVLEVR.D<br>K.VGDEVYVDRVENANGETMLSR.D<br>K.KNDVTVSVLEVR.D<br>R.EAAWDRLEEFNK.E<br>R.DDFAAMLDESLLGGADGGFGR.V<br>K.NITDYGAFVDLGGIDGLLHVTMSYK.R<br>K.GAPAVGGGMAAGSLK.K<br>R.RGNIVVSR.R<br>K.RVNHPSIENIGDITVK.V<br>R.VENANGETMLSR.D<br>K.NITDYGAFVDLGGIDGLLHVTMSYK.R<br>R.VEGVIFGR.V<br>R.RAILEETR.A<br>K.VGDEVYVDR.V<br>K.IVSTISQEVIVLVEVSDK.R<br>K.GTVAIENDLAVIDIGLKSEGR.V<br>K.AMQIAEKE.E<br>R.LEEFNKEAR.V<br>K.LSGTVTNITDYGAFVELEPGIEGLVHSEMWWK.K<br>K.LSGTVTNITDYGAFVELEPGIEGLVHSEMWWK.N<br>K.KPNFSVK.A<br>R.VKGGFTVDLGGAVAFPLPSQVDIRPVR.D<br>R.VENANGETMLSR.D<br>R.KGETVQVVLDVVEKER.I<br>R.EAAWDRLEEFNKEAR.V<br>R.DVGLMDLPQPFQILK.M<br>R.DDFAAMLDESLLGGADGGFGR.V<br>R.AILEETRAEQR.S<br>K.NDVVTVSVLEVRDNGLEVQAGESVGTGFKR<br>K.GGFTVDLGGAVAFPLPSQVDIR.P<br>K.GAPAVGGGMAAGSLK.K<br>K.GAPAVGGGMAAGSLK.K<br>K.FDAMVVGFR.S<br>K.AMQIAEKEAVAQYSSDSGASLDILGEALK.A<br>K.AMQIAEKE.E<br>R.YQVQKFDAMVVGFR.S<br>R.VKGGFTVDLGGAVAFPLPSQVDIR.P<br>R.AILEETRAEQR.S<br>R.INRDTQR.I<br>R.GNIVSRR.A<br>R.EFAMPQK.A<br>K.NITDYGAFVDLGGIDGLLHVTMSYK.R<br>K.NITDYGAFVDLGGIDGLLHVTMSYK.R<br>R.IVDTFDSIVDQLATGGR.V<br>K.IANENSDLRVEEVER.I<br>R.TGAIVEK.A<br>K.IANENSDLR.V<br>R.AIYLFEMAR.F<br>R.TVTLFNPVYVLSGFR.W<br>K.NPAYIEQLLR.D<br>K.QSSLEDIFVGLVR.E<br>K.LELAGDGHLYVFEFDSQAEATGVPSLLR.R<br>K.TLTLNLAELPDAVPPELADWK.L<br>K.GQILVVEK.H<br>K.ALSHEPEILFLDEPTAGVDVLR.R.D<br>K.SGHIALSNVDLEINKGEIFALLGPNAGK.T<br>R.SMIGLVPQELHTDAFETVLTATVSPSR.G<br>R.GVTIILTHYIEEAEEMADR.V<br>R.DMVAWVHGLR.E<br>R.LVDPVPVGLFGLAFVR.A<br>R.LVEAFGLTEWQQVTLRPLLYTR.D<br>R.FSTLPYVASNIGR.S<br>R.DGGPAPLLPAWADYDEASR.L<br>R.LSVQPALLELLAQPSMAIVNR.G<br>R.EAQQLIDQATINIDAGQR.A<br>R.AEGNPDALDARPSISK.T<br>R.QLLVDEDEFAR.T<br>R.IVVLTFGASIATAVEAIK.L<br>R.GAGFWLTLPTPR.F<br>R.HDRETLIQVTER.G<br>R.DFDIJAATVAIEGAR.T<br>K.FELAEESGDPWGR.T<br>K.SLPAGEFDQWVAATR.A<br>R.TGPKPVAEVKPLDVQWALDWK.W<br>R.ASAEGDLSR.N<br>R.YDKPQIVPLLPEDPGIDLAAALNLENFAGGR.A<br>R.VSIAFGNAALDVTDWGAAPIGK.L<br>R.DFSGTLFPAWPAATAASPIAALPFIYGLR.Y<br>R.SPQAISDPATER.R<br>K.VGQLIQADISAITPK.D<br>R.SYEGVAADPQLVAQYK.A<br>R.PLFTNPEINAADAFVAAWLPGSQGAGVAVLVR.R<br>R.ADPSTIGAPDHLAVAR.E<br>K.GLVASTLEQAK.S<br>R.QALGFPTAAPAGPADETVASVFN.<br>K.GAEAVWSELLAR.S<br>R.RDPSHPAPFFAGLALAQGGDLK.G |
| YP_616536 | Sala_1490 | hypothetical protein                           | 25.95%            | 2                       |                                                                                                                                                                                                                                                                                                                                                                                                                                                                                                                                                                                                                                                                                                                                                                                                                                                                                                                                                                                                                                                                                                                                                                                                                                                                                                                                                                                                                                                                                                                                                                                                                                                                                                                                                                                                                                                                                                                                                                                                                                                                                                                                                                                                                                                                                                                                                                                                                                                                                                                                                                                                                                                                                                                                                                                                                                                                                                                                                                                                                                                                                                                                                                                                                                                                                                                                                                                                                                                                                                                   |
| YP_616537 | Sala_1491 | transcriptional regulator, BadM/Rrf2 family    | 41.50%            | 4                       |                                                                                                                                                                                                                                                                                                                                                                                                                                                                                                                                                                                                                                                                                                                                                                                                                                                                                                                                                                                                                                                                                                                                                                                                                                                                                                                                                                                                                                                                                                                                                                                                                                                                                                                                                                                                                                                                                                                                                                                                                                                                                                                                                                                                                                                                                                                                                                                                                                                                                                                                                                                                                                                                                                                                                                                                                                                                                                                                                                                                                                                                                                                                                                                                                                                                                                                                                                                                                                                                                                                   |
| YP_616538 | Sala_1492 | hypothetical protein                           | 24.07%            | 2                       |                                                                                                                                                                                                                                                                                                                                                                                                                                                                                                                                                                                                                                                                                                                                                                                                                                                                                                                                                                                                                                                                                                                                                                                                                                                                                                                                                                                                                                                                                                                                                                                                                                                                                                                                                                                                                                                                                                                                                                                                                                                                                                                                                                                                                                                                                                                                                                                                                                                                                                                                                                                                                                                                                                                                                                                                                                                                                                                                                                                                                                                                                                                                                                                                                                                                                                                                                                                                                                                                                                                   |
| YP_616539 | Sala_1493 | 3-phosphoshikimate 1-carboxyvinyltransferase   | 56.05%            | 16                      |                                                                                                                                                                                                                                                                                                                                                                                                                                                                                                                                                                                                                                                                                                                                                                                                                                                                                                                                                                                                                                                                                                                                                                                                                                                                                                                                                                                                                                                                                                                                                                                                                                                                                                                                                                                                                                                                                                                                                                                                                                                                                                                                                                                                                                                                                                                                                                                                                                                                                                                                                                                                                                                                                                                                                                                                                                                                                                                                                                                                                                                                                                                                                                                                                                                                                                                                                                                                                                                                                                                   |
| YP_616540 | Sala_1494 | cytidylate kinase                              | 67.46%            | 9                       |                                                                                                                                                                                                                                                                                                                                                                                                                                                                                                                                                                                                                                                                                                                                                                                                                                                                                                                                                                                                                                                                                                                                                                                                                                                                                                                                                                                                                                                                                                                                                                                                                                                                                                                                                                                                                                                                                                                                                                                                                                                                                                                                                                                                                                                                                                                                                                                                                                                                                                                                                                                                                                                                                                                                                                                                                                                                                                                                                                                                                                                                                                                                                                                                                                                                                                                                                                                                                                                                                                                   |
| YP_616541 | Sala_1495 | ribosomal protein S1                           | 84.39%            | 56                      |                                                                                                                                                                                                                                                                                                                                                                                                                                                                                                                                                                                                                                                                                                                                                                                                                                                                                                                                                                                                                                                                                                                                                                                                                                                                                                                                                                                                                                                                                                                                                                                                                                                                                                                                                                                                                                                                                                                                                                                                                                                                                                                                                                                                                                                                                                                                                                                                                                                                                                                                                                                                                                                                                                                                                                                                                                                                                                                                                                                                                                                                                                                                                                                                                                                                                                                                                                                                                                                                                                                   |
| YP_616542 | Sala_1496 | histone-like DNA-binding protein               | 44.57%            | 4                       |                                                                                                                                                                                                                                                                                                                                                                                                                                                                                                                                                                                                                                                                                                                                                                                                                                                                                                                                                                                                                                                                                                                                                                                                                                                                                                                                                                                                                                                                                                                                                                                                                                                                                                                                                                                                                                                                                                                                                                                                                                                                                                                                                                                                                                                                                                                                                                                                                                                                                                                                                                                                                                                                                                                                                                                                                                                                                                                                                                                                                                                                                                                                                                                                                                                                                                                                                                                                                                                                                                                   |
| YP_616543 | Sala_1497 | ABC-2                                          | 9.80%             | 2                       |                                                                                                                                                                                                                                                                                                                                                                                                                                                                                                                                                                                                                                                                                                                                                                                                                                                                                                                                                                                                                                                                                                                                                                                                                                                                                                                                                                                                                                                                                                                                                                                                                                                                                                                                                                                                                                                                                                                                                                                                                                                                                                                                                                                                                                                                                                                                                                                                                                                                                                                                                                                                                                                                                                                                                                                                                                                                                                                                                                                                                                                                                                                                                                                                                                                                                                                                                                                                                                                                                                                   |
| YP_616544 | Sala_1498 | ABC transporter related                        | 60.32%            | 10                      |                                                                                                                                                                                                                                                                                                                                                                                                                                                                                                                                                                                                                                                                                                                                                                                                                                                                                                                                                                                                                                                                                                                                                                                                                                                                                                                                                                                                                                                                                                                                                                                                                                                                                                                                                                                                                                                                                                                                                                                                                                                                                                                                                                                                                                                                                                                                                                                                                                                                                                                                                                                                                                                                                                                                                                                                                                                                                                                                                                                                                                                                                                                                                                                                                                                                                                                                                                                                                                                                                                                   |
| YP_616546 | Sala_1500 | extracellular solute-binding protein, family 5 | 22.36%            | 6                       |                                                                                                                                                                                                                                                                                                                                                                                                                                                                                                                                                                                                                                                                                                                                                                                                                                                                                                                                                                                                                                                                                                                                                                                                                                                                                                                                                                                                                                                                                                                                                                                                                                                                                                                                                                                                                                                                                                                                                                                                                                                                                                                                                                                                                                                                                                                                                                                                                                                                                                                                                                                                                                                                                                                                                                                                                                                                                                                                                                                                                                                                                                                                                                                                                                                                                                                                                                                                                                                                                                                   |
| YP_616548 | Sala_1502 | response regulator receiver protein            | 27.12%            | 3                       |                                                                                                                                                                                                                                                                                                                                                                                                                                                                                                                                                                                                                                                                                                                                                                                                                                                                                                                                                                                                                                                                                                                                                                                                                                                                                                                                                                                                                                                                                                                                                                                                                                                                                                                                                                                                                                                                                                                                                                                                                                                                                                                                                                                                                                                                                                                                                                                                                                                                                                                                                                                                                                                                                                                                                                                                                                                                                                                                                                                                                                                                                                                                                                                                                                                                                                                                                                                                                                                                                                                   |
| YP_616550 | Sala_1504 | Surfeit locus 1                                | 11.59%            | 2                       |                                                                                                                                                                                                                                                                                                                                                                                                                                                                                                                                                                                                                                                                                                                                                                                                                                                                                                                                                                                                                                                                                                                                                                                                                                                                                                                                                                                                                                                                                                                                                                                                                                                                                                                                                                                                                                                                                                                                                                                                                                                                                                                                                                                                                                                                                                                                                                                                                                                                                                                                                                                                                                                                                                                                                                                                                                                                                                                                                                                                                                                                                                                                                                                                                                                                                                                                                                                                                                                                                                                   |
| YP_616553 | Sala_1507 | Cytochrome-c oxidase                           | 4.32%             | 2                       |                                                                                                                                                                                                                                                                                                                                                                                                                                                                                                                                                                                                                                                                                                                                                                                                                                                                                                                                                                                                                                                                                                                                                                                                                                                                                                                                                                                                                                                                                                                                                                                                                                                                                                                                                                                                                                                                                                                                                                                                                                                                                                                                                                                                                                                                                                                                                                                                                                                                                                                                                                                                                                                                                                                                                                                                                                                                                                                                                                                                                                                                                                                                                                                                                                                                                                                                                                                                                                                                                                                   |
| YP_616554 | Sala_1508 | ubiquinol oxidase, subunit II                  | 11.74%            | 3                       |                                                                                                                                                                                                                                                                                                                                                                                                                                                                                                                                                                                                                                                                                                                                                                                                                                                                                                                                                                                                                                                                                                                                                                                                                                                                                                                                                                                                                                                                                                                                                                                                                                                                                                                                                                                                                                                                                                                                                                                                                                                                                                                                                                                                                                                                                                                                                                                                                                                                                                                                                                                                                                                                                                                                                                                                                                                                                                                                                                                                                                                                                                                                                                                                                                                                                                                                                                                                                                                                                                                   |
| YP_616557 | Sala_1511 | Beta-glucosidase                               | 23.00%            | 9                       |                                                                                                                                                                                                                                                                                                                                                                                                                                                                                                                                                                                                                                                                                                                                                                                                                                                                                                                                                                                                                                                                                                                                                                                                                                                                                                                                                                                                                                                                                                                                                                                                                                                                                                                                                                                                                                                                                                                                                                                                                                                                                                                                                                                                                                                                                                                                                                                                                                                                                                                                                                                                                                                                                                                                                                                                                                                                                                                                                                                                                                                                                                                                                                                                                                                                                                                                                                                                                                                                                                                   |
| YP_616559 | Sala_1513 | cytochrome c biogenesis factor                 | 33.04%            | 5                       |                                                                                                                                                                                                                                                                                                                                                                                                                                                                                                                                                                                                                                                                                                                                                                                                                                                                                                                                                                                                                                                                                                                                                                                                                                                                                                                                                                                                                                                                                                                                                                                                                                                                                                                                                                                                                                                                                                                                                                                                                                                                                                                                                                                                                                                                                                                                                                                                                                                                                                                                                                                                                                                                                                                                                                                                                                                                                                                                                                                                                                                                                                                                                                                                                                                                                                                                                                                                                                                                                                                   |

| Accession | Locus tag | Description                                        | Sequence coverage | No. peptides identified | List of peptides identified                                                                                                                                                                                                                                                                                                                                                                                                                                                                                                                                                                                                                                                                                                                                                                                                                                                                                                                                                                                                                                                                                                                                                                                                                                                                                                                                                                                                                                                                                                                                                                                                                                                                                                                                                                                                                                                                                                                                                                                                                                                                                                                                                                                                                                                                                                                                                                                                                                                                                                                                                                                                                                                                                                                                                                                                                                                                                                                                                                                                                                                                                                                                                                                                                                                                                                                                                                                                                                                                                                                                |
|-----------|-----------|----------------------------------------------------|-------------------|-------------------------|------------------------------------------------------------------------------------------------------------------------------------------------------------------------------------------------------------------------------------------------------------------------------------------------------------------------------------------------------------------------------------------------------------------------------------------------------------------------------------------------------------------------------------------------------------------------------------------------------------------------------------------------------------------------------------------------------------------------------------------------------------------------------------------------------------------------------------------------------------------------------------------------------------------------------------------------------------------------------------------------------------------------------------------------------------------------------------------------------------------------------------------------------------------------------------------------------------------------------------------------------------------------------------------------------------------------------------------------------------------------------------------------------------------------------------------------------------------------------------------------------------------------------------------------------------------------------------------------------------------------------------------------------------------------------------------------------------------------------------------------------------------------------------------------------------------------------------------------------------------------------------------------------------------------------------------------------------------------------------------------------------------------------------------------------------------------------------------------------------------------------------------------------------------------------------------------------------------------------------------------------------------------------------------------------------------------------------------------------------------------------------------------------------------------------------------------------------------------------------------------------------------------------------------------------------------------------------------------------------------------------------------------------------------------------------------------------------------------------------------------------------------------------------------------------------------------------------------------------------------------------------------------------------------------------------------------------------------------------------------------------------------------------------------------------------------------------------------------------------------------------------------------------------------------------------------------------------------------------------------------------------------------------------------------------------------------------------------------------------------------------------------------------------------------------------------------------------------------------------------------------------------------------------------------------------|
| YP_616561 | Sala_1515 | Thioredoxin-like protein                           | 27.84%            | 3                       | R.DPSHPAPFFAGLALAQGGDLK.G<br>R.FGPAQWLGMSDFGAR.T<br>R.EQIQGVVLADQPELVAK.I<br>R.DRPEDVAFLNEYGNPFR.I<br>K.AAGVPIDGAIK.D<br>K.LKVPVAVAGGANNQALATLDGQR.I<br>R.VAIQVGVSGGGVAR.R<br>K.LTLADVNLAR.A<br>K.HVSGLPVASEAGGDPGPFALGVYLK.A<br>R.LAEIWAESK.A<br>K.ASGTFAVSVADR.M<br>R.AVDSLGGAVYTAEDVITDADMVEISR.Q<br>R.AAAITDALR.L<br>R.GIVYAPDYVINAGGIINVALEYLGGQSQVEESR.I<br>R.ASGLTAVIAVHSTYLGPGAGGVR.Y<br>K.RPELLAAR.GR.A<br>K.GVILADEGQEKPELLAAR.FR.A<br>K.GVILADEGQEK.R<br>K.LHDLTGIFLAPLELQGR.Y<br>R.ERPWPWAAGELE.<br>R.FLDAETCAALIDLIDSDARPSTIADANGDAAFR.T<br>R.TSSTCDLDRHLPVIAVNNK.L<br>K.AEDIQTSIGINLSPQYDYSNR.T<br>R.FLGYQVSNTRV.A<br>R.GIKAEDIQTSIGINLSPQYDYSNR.T<br>R.VSNTLTLNFQYR.L<br>R.SRPDQATVAGVITTTAPTAVEAMR.A<br>R.AAELVSIQEGGAGQPPMPYAR.M<br>K.AEDIQTSIGINLSPQYDYSNRDGGPPR.F<br>K.DPDAQLVGR.G<br>K.IDDIGPLLDALVAAGGTNIEGPFWAMK.D<br>R.SRPDQATVAGVITTTAPTAVEAMR.A<br>R.ATTGKIDDIGPLLDALVAAGGTNIEGPFWAMK.D<br>R.AAELVSIQEGGAGQPPMPYAR.M<br>K.IDDIGPLLDALVAAGGTNIEGPFWAMKDPDAQLVGR.G<br>R.MEIAADK.S<br>R.ANAAMDR.L<br>K.SAAAEESTPPPPR.A<br>K.EFLFDPGVVEASVGLSGGER.S<br>R.IEIEIEAIEADIEAELSDGALFTR.D<br>K.EIGFGFEWTEAVVAEEAR.A<br>R.VRDLVADGGDWVEVR.G<br>R.ALAQNPVLLDEPTNHLDAIDWLESWLAR.Y<br>K.LLTGELQPDGSGSITLAPTLGIIIDQQR.S<br>K.LGLANDDVR.S<br>R.LAAAGALLDLR.A<br>R.TRPAAELVAER.L<br>R.VVIVDPLDGR.E<br>R.LGAELVAMGSAGAK.A<br>R.YNNADTYLPDLICR.K<br>R.PGDALLEEEKDNVAR.C<br>R.AARPGDALLEEEKDNVAR.C<br>R.LGAEIVAMGSAGAK.A<br>R.GFAGQLASGTVKPGDPVRI<br>K.LATQSVATVQTPK.Y<br>R.IDTTAMSPAAADLIVEHLLG.<br>R.AFASEIGITGFTAIPIISGFR.G<br>K.NFTGIDSPYEAPEPTEIR.I<br>R.VGTQSQEIDFALLVGLAAER.E<br>R.AQNHVWQASDISR.E<br>K.FIVADTPGHEQYTR.N<br>K.YEINVNTLHLAAK.T<br>K.NQKALLWFTGLSGSGK.S<br>R.TLGGFILD.L<br>K.GPTLIEHLETVIEIAAAAEAKPFR.M<br>R.RAQNHVWQASDISR.E<br>R.HSFLAHLIGK.H<br>K.DLGFTEADRIENIR.R<br>R.KGVLTQR.R<br>R.HSFLLDGDNVR.H<br>K.MIFEDQLAALAEASK.R<br>R.MIFEDQLAALAEASK.R<br>R.GDVIAAANPPEAADRFEATLVWMADEAMIPGR.A<br>R.GDNITALSK.N<br>K.LTNATVAAGMLHFSLR.R<br>R.FITCGSVDDGK.S<br>K.TLELNGVIVELSTDKPIVFEAYGDN.R<br>K.HIVLAWNK.M<br>R.RVGEVAKL<br>R.NMVTGASTADLAVILDAR.K<br>R.IDTTAMSPAAADLIVEHLLG.<br>R.FITCGSVDDGKSTLIGR.L<br>K.STIANVEKK.L<br>K.LMTDAGLVITAFISPRF.A<br>K.QRPELWNLNAR.K<br>K.QALDLHGDFVAFGGAR.R<br>K.TLSEVIQEMLLTTTSSER.Q<br>R.IIDKSGDASMEK.K<br>R.VFPIHNTWELDIQYIAR.E<br>R.ENIPVPIVFAAPR.P<br>K.AFPSPPPFLLHVDTTWK.F<br>R.KAFYSPPPFLLHVDTTWK.F<br>K.DSVMHLAR.K<br>R.EVMADAAPVMLYSVGK.D<br>K.TEGLKQALDLHGDFVAFGGAR.R<br>R.TLGCYPLTGAIVESAK.T<br>R.IIDKSGDASMEK.K<br>R.DGLLLMDDDRFPLRPEVPTLR.S<br>R.MAAESGMELIVHQNPEAK.A<br>K.TLSEVIQEMLLTTTSSER.Q<br>R.ELGLIADPAWALPDVAPR.L<br>R.TGEQAAELK.L<br>R.FDAAGAILLASESAVK.V<br>K.VAGEAIQALGGAGYK.D<br>R.FADEQIAPLAR.A<br>R.ATPFDFFALGETADMIR.E<br>R.SIPLFLQNISGFMVGGK.Y<br>K.LVTAVATATVPK.I<br>R.YDAEDLYGIIPQDVR.A<br>R.APYDVHEVIAR.L<br>R.VAEALGGNEK.S<br>R.LWDDGIIDPAQTR.D<br>K.TNSFLIAALDHPDFVAGTVDTGLIGR.D<br>R.TVAVYSDADAK.A<br>R.EAASFGNDHVLIEK.Y<br>R.ELLESEMLEDIAWPK.T<br>R.QADEAVHIGSPAR.E<br>R.LYAEPAKFLPSTGTLELQPEHIGR.I<br>R.LQVEHPVTEITGVDLVEWQLR.V<br>R.IDTGVYEGAEVSPFYDPMIAK.V<br>R.AEGSASGAAGDAILSPMPGK.I<br>R.AAEGYVPLKAVAGGGGKMRK.V<br>R.MIQSLLIANR.G<br>K.YILTPRHIEVQIFGDTHGNVHLFER.D<br>K.VIEEAPAPGMDEATR.A<br>K.IIAVEVAAAGDITVAK.G<br>K.GFLPSTGTLELQPEHIGR.I<br>K.AVDYVAGTIEFIADASEGLR.A<br>R.SETADDASLPAILLIATETPAAILTIGSYR.E<br>K.AEGAPSIQQLDITLR.S<br>R.AQAIVDFAANPGAGVQVLDGK.M<br>R.DGFTGMMAIHPSQVEPINAFTPSAEEAAR.A<br>R.LLGLTWGAEDLPAIAGTTSR.E<br>K.DADGLAAYAR.A<br>K.AAASGADAILDLEDVSPANK.D<br>R.ALTFAAHAAGVAIDTVFAIKDADGLAAYAR.A<br>K.AAASGADAILDLEDVSPANKDAAR.H |
| YP_616567 | Sala_1521 | Glu/Leu/Phe/Val dehydrogenase, dimerisation region | 60.46%            | 13                      |                                                                                                                                                                                                                                                                                                                                                                                                                                                                                                                                                                                                                                                                                                                                                                                                                                                                                                                                                                                                                                                                                                                                                                                                                                                                                                                                                                                                                                                                                                                                                                                                                                                                                                                                                                                                                                                                                                                                                                                                                                                                                                                                                                                                                                                                                                                                                                                                                                                                                                                                                                                                                                                                                                                                                                                                                                                                                                                                                                                                                                                                                                                                                                                                                                                                                                                                                                                                                                                                                                                                                            |
| YP_616568 | Sala_1522 | 2OG-Fe(II) oxygenase                               | 38.53%            | 4                       |                                                                                                                                                                                                                                                                                                                                                                                                                                                                                                                                                                                                                                                                                                                                                                                                                                                                                                                                                                                                                                                                                                                                                                                                                                                                                                                                                                                                                                                                                                                                                                                                                                                                                                                                                                                                                                                                                                                                                                                                                                                                                                                                                                                                                                                                                                                                                                                                                                                                                                                                                                                                                                                                                                                                                                                                                                                                                                                                                                                                                                                                                                                                                                                                                                                                                                                                                                                                                                                                                                                                                            |
| YP_616569 | Sala_1523 | protein of unknown function DUF541                 | 79.15%            | 15                      |                                                                                                                                                                                                                                                                                                                                                                                                                                                                                                                                                                                                                                                                                                                                                                                                                                                                                                                                                                                                                                                                                                                                                                                                                                                                                                                                                                                                                                                                                                                                                                                                                                                                                                                                                                                                                                                                                                                                                                                                                                                                                                                                                                                                                                                                                                                                                                                                                                                                                                                                                                                                                                                                                                                                                                                                                                                                                                                                                                                                                                                                                                                                                                                                                                                                                                                                                                                                                                                                                                                                                            |
| YP_616570 | Sala_1524 | ABC transporter related                            | 27.15%            | 8                       |                                                                                                                                                                                                                                                                                                                                                                                                                                                                                                                                                                                                                                                                                                                                                                                                                                                                                                                                                                                                                                                                                                                                                                                                                                                                                                                                                                                                                                                                                                                                                                                                                                                                                                                                                                                                                                                                                                                                                                                                                                                                                                                                                                                                                                                                                                                                                                                                                                                                                                                                                                                                                                                                                                                                                                                                                                                                                                                                                                                                                                                                                                                                                                                                                                                                                                                                                                                                                                                                                                                                                            |
| YP_616571 | Sala_1525 | inositol monophosphatase                           | 34.27%            | 8                       |                                                                                                                                                                                                                                                                                                                                                                                                                                                                                                                                                                                                                                                                                                                                                                                                                                                                                                                                                                                                                                                                                                                                                                                                                                                                                                                                                                                                                                                                                                                                                                                                                                                                                                                                                                                                                                                                                                                                                                                                                                                                                                                                                                                                                                                                                                                                                                                                                                                                                                                                                                                                                                                                                                                                                                                                                                                                                                                                                                                                                                                                                                                                                                                                                                                                                                                                                                                                                                                                                                                                                            |
| YP_616572 | Sala_1526 | Sulfate adenylyltransferase, large subunit         | 67.77%            | 31                      |                                                                                                                                                                                                                                                                                                                                                                                                                                                                                                                                                                                                                                                                                                                                                                                                                                                                                                                                                                                                                                                                                                                                                                                                                                                                                                                                                                                                                                                                                                                                                                                                                                                                                                                                                                                                                                                                                                                                                                                                                                                                                                                                                                                                                                                                                                                                                                                                                                                                                                                                                                                                                                                                                                                                                                                                                                                                                                                                                                                                                                                                                                                                                                                                                                                                                                                                                                                                                                                                                                                                                            |
| YP_616573 | Sala_1527 | Sulfate adenylyltransferase, small subunit         | 66.11%            | 16                      |                                                                                                                                                                                                                                                                                                                                                                                                                                                                                                                                                                                                                                                                                                                                                                                                                                                                                                                                                                                                                                                                                                                                                                                                                                                                                                                                                                                                                                                                                                                                                                                                                                                                                                                                                                                                                                                                                                                                                                                                                                                                                                                                                                                                                                                                                                                                                                                                                                                                                                                                                                                                                                                                                                                                                                                                                                                                                                                                                                                                                                                                                                                                                                                                                                                                                                                                                                                                                                                                                                                                                            |
| YP_616574 | Sala_1528 | transcriptional regulator, LysR family             | 9.67%             | 2                       |                                                                                                                                                                                                                                                                                                                                                                                                                                                                                                                                                                                                                                                                                                                                                                                                                                                                                                                                                                                                                                                                                                                                                                                                                                                                                                                                                                                                                                                                                                                                                                                                                                                                                                                                                                                                                                                                                                                                                                                                                                                                                                                                                                                                                                                                                                                                                                                                                                                                                                                                                                                                                                                                                                                                                                                                                                                                                                                                                                                                                                                                                                                                                                                                                                                                                                                                                                                                                                                                                                                                                            |
| YP_616575 | Sala_1529 | acyl-CoA dehydrogenase-like protein                | 15.68%            | 4                       |                                                                                                                                                                                                                                                                                                                                                                                                                                                                                                                                                                                                                                                                                                                                                                                                                                                                                                                                                                                                                                                                                                                                                                                                                                                                                                                                                                                                                                                                                                                                                                                                                                                                                                                                                                                                                                                                                                                                                                                                                                                                                                                                                                                                                                                                                                                                                                                                                                                                                                                                                                                                                                                                                                                                                                                                                                                                                                                                                                                                                                                                                                                                                                                                                                                                                                                                                                                                                                                                                                                                                            |
| YP_616578 | Sala_1532 | Propionyl-CoA carboxylase                          | 15.04%            | 6                       |                                                                                                                                                                                                                                                                                                                                                                                                                                                                                                                                                                                                                                                                                                                                                                                                                                                                                                                                                                                                                                                                                                                                                                                                                                                                                                                                                                                                                                                                                                                                                                                                                                                                                                                                                                                                                                                                                                                                                                                                                                                                                                                                                                                                                                                                                                                                                                                                                                                                                                                                                                                                                                                                                                                                                                                                                                                                                                                                                                                                                                                                                                                                                                                                                                                                                                                                                                                                                                                                                                                                                            |
| YP_616579 | Sala_1533 | Carbamoyl-phosphate synthase L chain, ATP-binding  | 46.41%            | 16                      |                                                                                                                                                                                                                                                                                                                                                                                                                                                                                                                                                                                                                                                                                                                                                                                                                                                                                                                                                                                                                                                                                                                                                                                                                                                                                                                                                                                                                                                                                                                                                                                                                                                                                                                                                                                                                                                                                                                                                                                                                                                                                                                                                                                                                                                                                                                                                                                                                                                                                                                                                                                                                                                                                                                                                                                                                                                                                                                                                                                                                                                                                                                                                                                                                                                                                                                                                                                                                                                                                                                                                            |
| YP_616581 | Sala_1535 | Citryl-CoA lyase                                   | 74.20%            | 12                      |                                                                                                                                                                                                                                                                                                                                                                                                                                                                                                                                                                                                                                                                                                                                                                                                                                                                                                                                                                                                                                                                                                                                                                                                                                                                                                                                                                                                                                                                                                                                                                                                                                                                                                                                                                                                                                                                                                                                                                                                                                                                                                                                                                                                                                                                                                                                                                                                                                                                                                                                                                                                                                                                                                                                                                                                                                                                                                                                                                                                                                                                                                                                                                                                                                                                                                                                                                                                                                                                                                                                                            |

| Accession | Locus tag | Description                                                | Sequence coverage | No. peptides identified | List of peptides identified                                                                                                                                                                                                                                                                                                                                                                                                                                                                                                                                                                                                                                                                                                                                                                                                                                                                                                                                                                                                                                                                                                                                                                                                                                                                                                                                                                                                                                                                                                                                                                                                                                                                                                                                                                                                                                                                                                                                                                                                                                                                                                                                                                                                                                                                                                                                                                                                                                                                                                                                                                                                                                                                                                                                                                                                                                                                                                                                                                                                                                                                                                                                                                                                                                                                                                                                                                                                                                                      |
|-----------|-----------|------------------------------------------------------------|-------------------|-------------------------|----------------------------------------------------------------------------------------------------------------------------------------------------------------------------------------------------------------------------------------------------------------------------------------------------------------------------------------------------------------------------------------------------------------------------------------------------------------------------------------------------------------------------------------------------------------------------------------------------------------------------------------------------------------------------------------------------------------------------------------------------------------------------------------------------------------------------------------------------------------------------------------------------------------------------------------------------------------------------------------------------------------------------------------------------------------------------------------------------------------------------------------------------------------------------------------------------------------------------------------------------------------------------------------------------------------------------------------------------------------------------------------------------------------------------------------------------------------------------------------------------------------------------------------------------------------------------------------------------------------------------------------------------------------------------------------------------------------------------------------------------------------------------------------------------------------------------------------------------------------------------------------------------------------------------------------------------------------------------------------------------------------------------------------------------------------------------------------------------------------------------------------------------------------------------------------------------------------------------------------------------------------------------------------------------------------------------------------------------------------------------------------------------------------------------------------------------------------------------------------------------------------------------------------------------------------------------------------------------------------------------------------------------------------------------------------------------------------------------------------------------------------------------------------------------------------------------------------------------------------------------------------------------------------------------------------------------------------------------------------------------------------------------------------------------------------------------------------------------------------------------------------------------------------------------------------------------------------------------------------------------------------------------------------------------------------------------------------------------------------------------------------------------------------------------------------------------------------------------------|
| YP_616583 | Sala_1537 | acyl-CoA dehydrogenase-like protein                        | 54.50%            | 25                      | R.YTQPYEVAR.A<br>R.SLLFPVGDPER.F<br>R.HVAEVLSTGR.E<br>R.QADDVLSLTPVK.G<br>K.IFSSGHEHLDIINIIHLVLA.K.T<br>R.LGVGIQLGQADIAFQNAVAYAQDRR.Q<br>R.MAANQAFAMYPGLTQAATAAAILVK.G<br>K.TPDAPDSVK.G<br>K.FLVEDGSLGER.N<br>R.LGVGIQLGQADIAFQNAVAYAQDRR.R<br>R.HDDGSVITPK.G<br>R.KIEAGSETMMALTEPFQFAA.<br>R.ITMIYEGANGVQAMDVLR.K<br>K.DKPALADFAGR.L<br>K.ADPLFVHPDVR.R<br>K.GLAAMFVHMNAAR.L<br>R.GAKDFLDAAK.I<br>R.ALTGPKDPOEK.A<br>R.NALQCGSIEHK.M<br>R.MAANQAFAMYPGLTQAATAAAILVK.G<br>R.MAANQAFAMYPGLTQAATAAAILVK.G<br>R.FLPDAGSLR.R<br>R.ALCWGLQVLDLVAHVAETEER.Q<br>R.AIQTLFAIVDAECAAAK.D<br>R.AVFNPDGYSVITGK.I<br>R.AIQTLFAIVDAECAAAK.D.P<br>K.GYTDKGYEVATNAQVFGHGHIIEHGMQSYVR.D<br>K.ANGELK.A<br>R.EQSTLDLSTEFQVTA.R<br>R.RQDDIDSVADELSR.F<br>R.DDIDSVADELSR.F<br>R.RVEADGGLTLADDAQG.<br>R.KGETSGNGLTVEMR.V<br>R.ENPVDADLVIPVDSGTAAIYAQESGIPFELGIIR.S<br>R.IVLDSDIVR.G<br>K.LGDHILASETVLDVVGAEFLR.S<br>R.YSTTGETALR.N<br>R.GSIFQSTSDTEVIIHLVATSSYR.S<br>R.GQEAAGITAFDGKEFHTR.A<br>R.SVEPSELLIII.D<br>R.QLDGSAVGHVR.Y<br>R.NVQPLFADLSTGFAIAHNGNISNAALR.K<br>R.RGSIFQSTSDTEVIIHLVATSSYR.S<br>R.KAIGAELAR.E<br>R.DAGAAEVHMR.I<br>R.TFIQPDKVR.H<br>R.NVQPLFADLSTGFAIAHNGNISNAALR.L<br>R.IHAAGSATTIAPLDLTDGDSIAR.L<br>R.GIGAAIAESLAAR.G<br>R.SEELAGQIALVTGASR.G<br>R.TAGGLELEDR.I<br>R.TLTLNLIQAALIANFDPLLR.R<br>R.TAGGLELEDR.IHAAGSATTIAPLDLTDGDSIAR.L<br>R.LALSTSVAR.T<br>R.AYFGEDPQSIKEPAVGEVADLMVQGFDFSTAFHALPK.V<br>R.TAILEDGPTR.T<br>R.AYWGAYAASK.A<br>K.AAFEVLVTSYGAEMR.N<br>R.WQHLDMLVNAAMGLTLPVAAIDGKEFN.R.T<br>R.WQLHLDMLVNAAMGLTLPVAAIDGK.E<br>R.GAHVITAR.T<br>R.TLTLNLIQAALIANFDPLLR.A<br>K.AAFEVLVTSYGAEMR.N<br>K.TGETNLIQVLSATGK.T<br>K.SFTSTLVGAANK.D<br>K.LIVASHNGHWPTADPEGVGAAR.E<br>R.NAGLIIVQDGK.I<br>K.GSAYDDVSVR.Q<br>R.VVNPVIEAGDTAYPLPQGTPIDFGLDVAHMAK.Q<br>K.SLDDKVAAYIPGLK.G<br>K.SDVAGFMQLKPVAGEDITVSYMK.G<br>K.DLNVFWITQQR.D<br>K.WNEDYTDPK.S<br>K.AVQAADVREAK.<br>R.VVNPVIEAGDTAYPLPQGTPIDFGLDVAHMAK.Q<br>R.FGQFLNGGVAGSVNLPDDWLASATTK.Q<br>K.YALGHDAAGR.W<br>K.TLSQKLEK.I<br>R.GYGYQWNTNDDGSFAAQIFGQGFIDPK.R<br>K.VAAYIPGLK.G<br>R.VGTTSPSTPYGSVDRPAQPAALFAGAGAR.F<br>R.TTLTKDWETDQEV.R.W<br>R.SVAHMLVEMR.F<br>K.TVEVGDWQAGVIVHDVTNR.S<br>K.TADLQSLK.K<br>K.GJALDAEALHLK.T<br>R.FGEFPMALGVLYDPRPTEADVVR.Q<br>K.KGQWTVTEK.G<br>R.FPYMETYGFHTIHR.A<br>R.APAFATGLK.L<br>R.GFDVSKELPNVLA.A<br>K.LANPQLDIWITGDGDLGSLGIGNHTMHLIRR.N<br>K.DVFDFAAPK.G<br>R.VGTTSPSTPYGSVDR.P<br>R.TMPEIGTAPENTVFSGIGCSSR.F<br>R.NLDCQJMLFNNEIYGLK.G<br>R.FGEFPMALGVLYDPRPTEADVVR.Q<br>R.NLDCQJMLFNNEIYGLK.G<br>K.HGEMPLYAK.G<br>K.GQWTVTEK.G<br>K.LNISQLTLDVAVKPGFLGNK.E<br>K.VSQPFTIAEIEAAIEEALK.<br>R.TLTAEGALGLVAGQALR.L<br>K.VPDLTYEAFVPEFLTEVEGGFKPYGR.D<br>K.TNVPALPKGGLIIADEGEFNDR.N<br>K.APDLAANVAALNAGHAYGETAELAGPLK.Q<br>K.LAVVWGSTFGPIHQAVR.R<br>R.HIWRPANLGAALK.S<br>K.AKYDANLDDGSLAK.W<br>K.YDANPLDDGSLAK.W<br>K.GEAMGLAIMEPLVIVNSQR.G<br>R.DQYLVDARPNK.V<br>K.VPDQIVELGAEGK.L<br>K.TEQSDLYQAVYGR.N<br>K.QHIVDPAPEGLYR.T<br>R.IAVQYMTVMMLTDGYIANAEPWK.V<br>R.GGPSTGLPK.T<br>R.DRQQLIDWLNK.F<br>K.EVDTGHINYAPANQAMTDIRK.A<br>R.NGDAMPVIAAR.S<br>K.IDGKIPDQIVELGAEGK.L<br>R.LPMFFGGYPTPASALHLSLR.L<br>R.PWVRPGTPLLHR.I<br>R.GGPSTGLPKTEQSDLYQAVYGR.N<br>R.APQGTLVGSAFQINFGSAIDTAGDAPDVLVAMNPAALK.T<br>K.SYDKVIVPEMNTGQLK.T<br>K.EVDTGHINYAPANQAMTDIRK.K<br>R.SPQATECAEAECR.I<br>R.PGTPGLLHR.I<br>K.TVLRDQYLVDARPNK.V<br>K.TNVPALPKGGLIIADEGEFNDRNLAK.A<br>R.QSPLSDAVVR.F<br>R.QLDMPVIAVDYR.L<br>R.LAFEPHFAPEDECAATR.W<br>R.GEIAHVEDR.T<br>R.DFEGHLLK.G<br>R.DDWQSYRDFEGHLLK.G |
| YP_616584 | Sala_1538 | transcriptional regulator, MerR family                     | 20.26%            | 3                       | R.EQSTLDLSTEFQVTA.R<br>R.RQDDIDSVADELSR.F<br>R.DDIDSVADELSR.F<br>R.RVEADGGLTLADDAQG.<br>R.KGETSGNGLTVEMR.V<br>R.ENPVDADLVIPVDSGTAAIYAQESGIPFELGIIR.S<br>R.IVLDSDIVR.G<br>K.LGDHILASETVLDVVGAEFLR.S<br>R.YSTTGETALR.N<br>R.GSIFQSTSDTEVIIHLVATSSYR.S<br>R.GQEAAGITAFDGKEFHTR.A<br>R.SVEPSELLIII.D<br>R.QLDGSAVGHVR.Y<br>R.NVQPLFADLSTGFAIAHNGNISNAALR.K<br>R.RGSIFQSTSDTEVIIHLVATSSYR.S<br>R.KAIGAELAR.E<br>R.DAGAAEVHMR.I<br>R.TFIQPDKVR.H<br>R.NVQPLFADLSTGFAIAHNGNISNAALR.L<br>R.IHAAGSATTIAPLDLTDGDSIAR.L<br>R.GIGAAIAESLAAR.G<br>R.SEELAGQIALVTGASR.G<br>R.TAGGLELEDR.I<br>R.TLTLNLIQAALIANFDPLLR.R<br>R.TAGGLELEDR.IHAAGSATTIAPLDLTDGDSIAR.L<br>R.LALSTSVAR.T<br>R.AYFGEDPQSIKEPAVGEVADLMVQGFDFSTAFHALPK.V<br>R.TAILEDGPTR.T<br>R.AYWGAYAASK.A<br>K.AAFEVLVTSYGAEMR.N<br>R.WQHLDMLVNAAMGLTLPVAAIDGKEFN.R.T<br>R.WQLHLDMLVNAAMGLTLPVAAIDGK.E<br>R.GAHVITAR.T<br>R.TLTLNLIQAALIANFDPLLR.A<br>K.AAFEVLVTSYGAEMR.N<br>K.TGETNLIQVLSATGK.T<br>K.SFTSTLVGAANK.D<br>K.LIVASHNGHWPTADPEGVGAAR.E<br>R.NAGLIIVQDGK.I<br>K.GSAYDDVSVR.Q<br>R.VVNPVIEAGDTAYPLPQGTPIDFGLDVAHMAK.Q<br>K.SLDDKVAAYIPGLK.G<br>K.SDVAGFMQLKPVAGEDITVSYMK.G<br>K.DLNVFWITQQR.D<br>K.WNEDYTDPK.S<br>K.AVQAADVREAK.<br>R.VVNPVIEAGDTAYPLPQGTPIDFGLDVAHMAK.Q<br>R.FGQFLNGGVAGSVNLPDDWLASATTK.Q<br>K.YALGHDAAGR.W<br>K.TLSQKLEK.I<br>R.GYGYQWNTNDDGSFAAQIFGQGFIDPK.R<br>K.VAAYIPGLK.G<br>R.VGTTSPSTPYGSVDRPAQPAALFAGAGAR.F<br>R.TTLTKDWETDQEV.R.W<br>R.SVAHMLVEMR.F<br>K.TVEVGDWQAGVIVHDVTNR.S<br>K.TADLQSLK.K<br>K.GJALDAEALHLK.T<br>R.FGEFPMALGVLYDPRPTEADVVR.Q<br>K.KGQWTVTEK.G<br>R.FPYMETYGFHTIHR.A<br>R.APAFATGLK.L<br>R.GFDVSKELPNVLA.A<br>K.LANPQLDIWITGDGDLGSLGIGNHTMHLIRR.N<br>K.DVFDFAAPK.G<br>R.VGTTSPSTPYGSVDR.P<br>R.TMPEIGTAPENTVFSGIGCSSR.F<br>R.NLDCQJMLFNNEIYGLK.G<br>R.FGEFPMALGVLYDPRPTEADVVR.Q<br>R.NLDCQJMLFNNEIYGLK.G<br>K.HGEMPLYAK.G<br>K.GQWTVTEK.G<br>K.LNISQLTLDVAVKPGFLGNK.E<br>K.VSQPFTIAEIEAAIEEALK.<br>R.TLTAEGALGLVAGQALR.L<br>K.VPDLTYEAFVPEFLTEVEGGFKPYGR.D<br>K.TNVPALPKGGLIIADEGEFNDR.N<br>K.APDLAANVAALNAGHAYGETAELAGPLK.Q<br>K.LAVVWGSTFGPIHQAVR.R<br>R.HIWRPANLGAALK.S<br>K.AKYDANLDDGSLAK.W<br>K.YDANPLDDGSLAK.W<br>K.GEAMGLAIMEPLVIVNSQR.G<br>R.DQYLVDARPNK.V<br>K.VPDQIVELGAEGK.L<br>K.TEQSDLYQAVYGR.N<br>K.QHIVDPAPEGLYR.T<br>R.IAVQYMTVMMLTDGYIANAEPWK.V<br>R.GGPSTGLPK.T<br>R.DRQQLIDWLNK.F<br>K.EVDTGHINYAPANQAMTDIRK.A<br>R.NGDAMPVIAAR.S<br>K.IDGKIPDQIVELGAEGK.L<br>R.LPMFFGGYPTPASALHLSLR.L<br>R.PWVRPGTPLLHR.I<br>R.GGPSTGLPKTEQSDLYQAVYGR.N<br>R.APQGTLVGSAFQINFGSAIDTAGDAPDVLVAMNPAALK.T<br>K.SYDKVIVPEMNTGQLK.T<br>K.EVDTGHINYAPANQAMTDIRK.K<br>R.SPQATECAEAECR.I<br>R.PGTPGLLHR.I<br>K.TVLRDQYLVDARPNK.V<br>K.TNVPALPKGGLIIADEGEFNDRNLAK.A<br>R.QSPLSDAVVR.F<br>R.QLDMPVIAVDYR.L<br>R.LAFEPHFAPEDECAATR.W<br>R.GEIAHVEDR.T<br>R.DFEGHLLK.G<br>R.DDWQSYRDFEGHLLK.G                                                                                                                                                                                                                                                                                                                                                                                                                                                                                                                                                                                                                                                                                         |
| YP_616586 | Sala_1540 | Phosphoribosyl-AMP cyclohydrolase                          | 25.40%            | 2                       | R.EQSTLDLSTEFQVTA.R<br>R.RQDDIDSVADELSR.F<br>R.DDIDSVADELSR.F<br>R.RVEADGGLTLADDAQG.<br>R.KGETSGNGLTVEMR.V<br>R.ENPVDADLVIPVDSGTAAIYAQESGIPFELGIIR.S<br>R.IVLDSDIVR.G<br>K.LGDHILASETVLDVVGAEFLR.S<br>R.YSTTGETALR.N<br>R.GSIFQSTSDTEVIIHLVATSSYR.S<br>R.GQEAAGITAFDGKEFHTR.A<br>R.SVEPSELLIII.D<br>R.QLDGSAVGHVR.Y<br>R.NVQPLFADLSTGFAIAHNGNISNAALR.K<br>R.RGSIFQSTSDTEVIIHLVATSSYR.S<br>R.KAIGAELAR.E<br>R.DAGAAEVHMR.I<br>R.TFIQPDKVR.H<br>R.NVQPLFADLSTGFAIAHNGNISNAALR.L<br>R.IHAAGSATTIAPLDLTDGDSIAR.L<br>R.GIGAAIAESLAAR.G<br>R.SEELAGQIALVTGASR.G<br>R.TAGGLELEDR.I<br>R.TLTLNLIQAALIANFDPLLR.R<br>R.TAGGLELEDR.IHAAGSATTIAPLDLTDGDSIAR.L<br>R.LALSTSVAR.T<br>R.AYFGEDPQSIKEPAVGEVADLMVQGFDFSTAFHALPK.V<br>R.TAILEDGPTR.T<br>R.AYWGAYAASK.A<br>K.AAFEVLVTSYGAEMR.N<br>R.WQHLDMLVNAAMGLTLPVAAIDGKEFN.R.T<br>R.WQLHLDMLVNAAMGLTLPVAAIDGK.E<br>R.GAHVITAR.T<br>R.TLTLNLIQAALIANFDPLLR.A<br>K.AAFEVLVTSYGAEMR.N<br>K.TGETNLIQVLSATGK.T<br>K.SFTSTLVGAANK.D<br>K.LIVASHNGHWPTADPEGVGAAR.E<br>R.NAGLIIVQDGK.I<br>K.GSAYDDVSVR.Q<br>R.VVNPVIEAGDTAYPLPQGTPIDFGLDVAHMAK.Q<br>K.SLDDKVAAYIPGLK.G<br>K.SDVAGFMQLKPVAGEDITVSYMK.G<br>K.DLNVFWITQQR.D<br>K.WNEDYTDPK.S<br>K.AVQAADVREAK.<br>R.VVNPVIEAGDTAYPLPQGTPIDFGLDVAHMAK.Q<br>R.FGQFLNGGVAGSVNLPDDWLASATTK.Q<br>K.YALGHDAAGR.W<br>K.TLSQKLEK.I<br>R.GYGYQWNTNDDGSFAAQIFGQGFIDPK.R<br>K.VAAYIPGLK.G<br>R.VGTTSPSTPYGSVDRPAQPAALFAGAGAR.F<br>R.TTLTKDWETDQEV.R.W<br>R.SVAHMLVEMR.F<br>K.TVEVGDWQAGVIVHDVTNR.S<br>K.TADLQSLK.K<br>K.GJALDAEALHLK.T<br>R.FGEFPMALGVLYDPRPTEADVVR.Q<br>K.KGQWTVTEK.G<br>R.FPYMETYGFHTIHR.A<br>R.APAFATGLK.L<br>R.GFDVSKELPNVLA.A<br>K.LANPQLDIWITGDGDLGSLGIGNHTMHLIRR.N<br>K.DVFDFAAPK.G<br>R.VGTTSPSTPYGSVDR.P<br>R.TMPEIGTAPENTVFSGIGCSSR.F<br>R.NLDCQJMLFNNEIYGLK.G<br>R.FGEFPMALGVLYDPRPTEADVVR.Q<br>R.NLDCQJMLFNNEIYGLK.G<br>K.HGEMPLYAK.G<br>K.GQWTVTEK.G<br>K.LNISQLTLDVAVKPGFLGNK.E<br>K.VSQPFTIAEIEAAIEEALK.<br>R.TLTAEGALGLVAGQALR.L<br>K.VPDLTYEAFVPEFLTEVEGGFKPYGR.D<br>K.TNVPALPKGGLIIADEGEFNDR.N<br>K.APDLAANVAALNAGHAYGETAELAGPLK.Q<br>K.LAVVWGSTFGPIHQAVR.R<br>R.HIWRPANLGAALK.S<br>K.AKYDANLDDGSLAK.W<br>K.YDANPLDDGSLAK.W<br>K.GEAMGLAIMEPLVIVNSQR.G<br>R.DQYLVDARPNK.V<br>K.VPDQIVELGAEGK.L<br>K.TEQSDLYQAVYGR.N<br>K.QHIVDPAPEGLYR.T<br>R.IAVQYMTVMMLTDGYIANAEPWK.V<br>R.GGPSTGLPK.T<br>R.DRQQLIDWLNK.F<br>K.EVDTGHINYAPANQAMTDIRK.A<br>R.NGDAMPVIAAR.S<br>K.IDGKIPDQIVELGAEGK.L<br>R.LPMFFGGYPTPASALHLSLR.L<br>R.PWVRPGTPLLHR.I<br>R.GGPSTGLPKTEQSDLYQAVYGR.N<br>R.APQGTLVGSAFQINFGSAIDTAGDAPDVLVAMNPAALK.T<br>K.SYDKVIVPEMNTGQLK.T<br>K.EVDTGHINYAPANQAMTDIRK.K<br>R.SPQATECAEAECR.I<br>R.PGTPGLLHR.I<br>K.TVLRDQYLVDARPNK.V<br>K.TNVPALPKGGLIIADEGEFNDRNLAK.A<br>R.QSPLSDAVVR.F<br>R.QLDMPVIAVDYR.L<br>R.LAFEPHFAPEDECAATR.W<br>R.GEIAHVEDR.T<br>R.DFEGHLLK.G<br>R.DDWQSYRDFEGHLLK.G                                                                                                                                                                                                                                                                                                                                                                                                                                                                                                                                                                                                                                                                                         |
| YP_616587 | Sala_1541 | amidophosphoribosyltransferase                             | 40.84%            | 14                      | R.EQSTLDLSTEFQVTA.R<br>R.RQDDIDSVADELSR.F<br>R.DDIDSVADELSR.F<br>R.RVEADGGLTLADDAQG.<br>R.KGETSGNGLTVEMR.V<br>R.ENPVDADLVIPVDSGTAAIYAQESGIPFELGIIR.S<br>R.IVLDSDIVR.G<br>K.LGDHILASETVLDVVGAEFLR.S<br>R.YSTTGETALR.N<br>R.GSIFQSTSDTEVIIHLVATSSYR.S<br>R.GQEAAGITAFDGKEFHTR.A<br>R.SVEPSELLIII.D<br>R.QLDGSAVGHVR.Y<br>R.NVQPLFADLSTGFAIAHNGNISNAALR.K<br>R.RGSIFQSTSDTEVIIHLVATSSYR.S<br>R.KAIGAELAR.E<br>R.DAGAAEVHMR.I<br>R.TFIQPDKVR.H<br>R.NVQPLFADLSTGFAIAHNGNISNAALR.L<br>R.IHAAGSATTIAPLDLTDGDSIAR.L<br>R.GIGAAIAESLAAR.G<br>R.SEELAGQIALVTGASR.G<br>R.TAGGLELEDR.I<br>R.TLTLNLIQAALIANFDPLLR.R<br>R.TAGGLELEDR.IHAAGSATTIAPLDLTDGDSIAR.L<br>R.LALSTSVAR.T<br>R.AYFGEDPQSIKEPAVGEVADLMVQGFDFSTAFHALPK.V<br>R.TAILEDGPTR.T<br>R.AYWGAYAASK.A<br>K.AAFEVLVTSYGAEMR.N<br>R.WQHLDMLVNAAMGLTLPVAAIDGKEFN.R.T<br>R.WQLHLDMLVNAAMGLTLPVAAIDGK.E<br>R.GAHVITAR.T<br>R.TLTLNLIQAALIANFDPLLR.A<br>K.AAFEVLVTSYGAEMR.N<br>K.TGETNLIQVLSATGK.T<br>K.SFTSTLVGAANK.D<br>K.LIVASHNGHWPTADPEGVGAAR.E<br>R.NAGLIIVQDGK.I<br>K.GSAYDDVSVR.Q<br>R.VVNPVIEAGDTAYPLPQGTPIDFGLDVAHMAK.Q<br>K.SLDDKVAAYIPGLK.G<br>K.SDVAGFMQLKPVAGEDITVSYMK.G<br>K.DLNVFWITQQR.D<br>K.WNEDYTDPK.S<br>K.AVQAADVREAK.<br>R.VVNPVIEAGDTAYPLPQGTPIDFGLDVAHMAK.Q<br>R.FGQFLNGGVAGSVNLPDDWLASATTK.Q<br>K.YALGHDAAGR.W<br>K.TLSQKLEK.I<br>R.GYGYQWNTNDDGSFAAQIFGQGFIDPK.R<br>K.VAAYIPGLK.G<br>R.VGTTSPSTPYGSVDRPAQPAALFAGAGAR.F<br>R.TTLTKDWETDQEV.R.W<br>R.SVAHMLVEMR.F<br>K.TVEVGDWQAGVIVHDVTNR.S<br>K.TADLQSLK.K<br>K.GJALDAEALHLK.T<br>R.FGEFPMALGVLYDPRPTEADVVR.Q<br>K.KGQWTVTEK.G<br>R.FPYMETYGFHTIHR.A<br>R.APAFATGLK.L<br>R.GFDVSKELPNVLA.A<br>K.LANPQLDIWITGDGDLGSLGIGNHTMHLIRR.N<br>K.DVFDFAAPK.G<br>R.VGTTSPSTPYGSVDR.P<br>R.TMPEIGTAPENTVFSGIGCSSR.F<br>R.NLDCQJMLFNNEIYGLK.G<br>R.FGEFPMALGVLYDPRPTEADVVR.Q<br>R.NLDCQJMLFNNEIYGLK.G<br>K.HGEMPLYAK.G<br>K.GQWTVTEK.G<br>K.LNISQLTLDVAVKPGFLGNK.E<br>K.VSQPFTIAEIEAAIEEALK.<br>R.TLTAEGALGLVAGQALR.L<br>K.VPDLTYEAFVPEFLTEVEGGFKPYGR.D<br>K.TNVPALPKGGLIIADEGEFNDR.N<br>K.APDLAANVAALNAGHAYGETAELAGPLK.Q<br>K.LAVVWGSTFGPIHQAVR.R<br>R.HIWRPANLGAALK.S<br>K.AKYDANLDDGSLAK.W<br>K.YDANPLDDGSLAK.W<br>K.GEAMGLAIMEPLVIVNSQR.G<br>R.DQYLVDARPNK.V<br>K.VPDQIVELGAEGK.L<br>K.TEQSDLYQAVYGR.N<br>K.QHIVDPAPEGLYR.T<br>R.IAVQYMTVMMLTDGYIANAEPWK.V<br>R.GGPSTGLPK.T<br>R.DRQQLIDWLNK.F<br>K.EVDTGHINYAPANQAMTDIRK.A<br>R.NGDAMPVIAAR.S<br>K.IDGKIPDQIVELGAEGK.L<br>R.LPMFFGGYPTPASALHLSLR.L<br>R.PWVRPGTPLLHR.I<br>R.GGPSTGLPKTEQSDLYQAVYGR.N<br>R.APQGTLVGSAFQINFGSAIDTAGDAPDVLVAMNPAALK.T<br>K.SYDKVIVPEMNTGQLK.T<br>K.EVDTGHINYAPANQAMTDIRK.K<br>R.SPQATECAEAECR.I<br>R.PGTPGLLHR.I<br>K.TVLRDQYLVDARPNK.V<br>K.TNVPALPKGGLIIADEGEFNDRNLAK.A<br>R.QSPLSDAVVR.F<br>R.QLDMPVIAVDYR.L<br>R.LAFEPHFAPEDECAATR.W<br>R.GEIAHVEDR.T<br>R.DFEGHLLK.G<br>R.DDWQSYRDFEGHLLK.G                                                                                                                                                                                                                                                                                                                                                                                                                                                                                                                                                                                                                                                                                         |
| YP_616588 | Sala_1542 | short-chain dehydrogenase/reductase SDR                    | 84.84%            | 16                      | R.EQSTLDLSTEFQVTA.R<br>R.RQDDIDSVADELSR.F<br>R.DDIDSVADELSR.F<br>R.RVEADGGLTLADDAQG.<br>R.KGETSGNGLTVEMR.V<br>R.ENPVDADLVIPVDSGTAAIYAQESGIPFELGIIR.S<br>R.IVLDSDIVR.G<br>K.LGDHILASETVLDVVGAEFLR.S<br>R.YSTTGETALR.N<br>R.GSIFQSTSDTEVIIHLVATSSYR.S<br>R.GQEAAGITAFDGKEFHTR.A<br>R.SVEPSELLIII.D<br>R.QLDGSAVGHVR.Y<br>R.NVQPLFADLSTGFAIAHNGNISNAALR.K<br>R.RGSIFQSTSDTEVIIHLVATSSYR.S<br>R.KAIGAELAR.E<br>R.DAGAAEVHMR.I<br>R.TFIQPDKVR.H<br>R.NVQPLFADLSTGFAIAHNGNISNAALR.L<br>R.IHAAGSATTIAPLDLTDGDSIAR.L<br>R.GIGAAIAESLAAR.G<br>R.SEELAGQIALVTGASR.G<br>R.TAGGLELEDR.I<br>R.TLTLNLIQAALIANFDPLLR.R<br>R.TAGGLELEDR.IHAAGSATTIAPLDLTDGDSIAR.L<br>R.LALSTSVAR.T<br>R.AYFGEDPQSIKEPAVGEVADLMVQGFDFSTAFHALPK.V<br>R.TAILEDGPTR.T<br>R.AYWGAYAASK.A<br>K.AAFEVLVTSYGAEMR.N<br>R.WQHLDMLVNAAMGLTLPVAAIDGKEFN.R.T<br>R.WQLHLDMLVNAAMGLTLPVAAIDGK.E<br>R.GAHVITAR.T<br>R.TLTLNLIQAALIANFDPLLR.A<br>K.AAFEVLVTSYGAEMR.N<br>K.TGETNLIQVLSATGK.T<br>K.SFTSTLVGAANK.D<br>K.LIVASHNGHWPTADPEGVGAAR.E<br>R.NAGLIIVQDGK.I<br>K.GSAYDDVSVR.Q<br>R.VVNPVIEAGDTAYPLPQGTPIDFGLDVAHMAK.Q<br>K.SLDDKVAAYIPGLK.G<br>K.SDVAGFMQLKPVAGEDITVSYMK.G<br>K.DLNVFWITQQR.D<br>K.WNEDYTDPK.S<br>K.AVQAADVREAK.<br>R.VVNPVIEAGDTAYPLPQGTPIDFGLDVAHMAK.Q<br>R.FGQFLNGGVAGSVNLPDDWLASATTK.Q<br>K.YALGHDAAGR.W<br>K.TLSQKLEK.I<br>R.GYGYQWNTNDDGSFAAQIFGQGFIDPK.R<br>K.VAAYIPGLK.G<br>R.VGTTSPSTPYGSVDRPAQPAALFAGAGAR.F<br>R.TTLTKDWETDQEV.R.W<br>R.SVAHMLVEMR.F<br>K.TVEVGDWQAGVIVHDVTNR.S<br>K.TADLQSLK.K<br>K.GJALDAEALHLK.T<br>R.FGEFPMALGVLYDPRPTEADVVR.Q<br>K.KGQWTVTEK.G<br>R.FPYMETYGFHTIHR.A<br>R.APAFATGLK.L<br>R.GFDVSKELPNVLA.A<br>K.LANPQLDIWITGDGDLGSLGIGNHTMHLIRR.N<br>K.DVFDFAAPK.G<br>R.VGTTSPSTPYGSVDR.P<br>R.TMPEIGTAPENTVFSGIGCSSR.F<br>R.NLDCQJMLFNNEIYGLK.G<br>R.FGEFPMALGVLYDPRPTEADVVR.Q<br>R.NLDCQJMLFNNEIYGLK.G<br>K.HGEMPLYAK.G<br>K.GQWTVTEK.G<br>K.LNISQLTLDVAVKPGFLGNK.E<br>K.VSQPFTIAEIEAAIEEALK.<br>R.TLTAEGALGLVAGQALR.L<br>K.VPDLTYEAFVPEFLTEVEGGFKPYGR.D<br>K.TNVPALPKGGLIIADEGEFNDR.N<br>K.APDLAANVAALNAGHAYGETAELAGPLK.Q<br>K.LAVVWGSTFGPIHQAVR.R<br>R.HIWRPANLGAALK.S<br>K.AKYDANLDDGSLAK.W<br>K.YDANPLDDGSLAK.W<br>K.GEAMGLAIMEPLVIVNSQR.G<br>R.DQYLVDARPNK.V<br>K.VPDQIVELGAEGK.L<br>K.TEQSDLYQAVYGR.N<br>K.QHIVDPAPEGLYR.T<br>R.IAVQYMTVMMLTDGYIANAEPWK.V<br>R.GGPSTGLPK.T<br>R.DRQQLIDWLNK.F<br>K.EVDTGHINYAPANQAMTDIRK.A<br>R.NGDAMPVIAAR.S<br>K.IDGKIPDQIVELGAEGK.L<br>R.LPMFFGGYPTPASALHLSLR.L<br>R.PWVRPGTPLLHR.I<br>R.GGPSTGLPKTEQSDLYQAVYGR.N<br>R.APQGTLVGSAFQINFGSAIDTAGDAPDVLVAMNPAALK.T<br>K.SYDKVIVPEMNTGQLK.T<br>K.EVDTGHINYAPANQAMTDIRK.K<br>R.SPQATECAEAECR.I<br>R.PGTPGLLHR.I<br>K.TVLRDQYLVDARPNK.V<br>K.TNVPALPKGGLIIADEGEFNDRNLAK.A<br>R.QSPLSDAVVR.F<br>R.QLDMPVIAVDYR.L<br>R.LAFEPHFAPEDECAATR.W<br>R.GEIAHVEDR.T<br>R.DFEGHLLK.G<br>R.DDWQSYRDFEGHLLK.G                                                                                                                                                                                                                                                                                                                                                                                                                                                                                                                                                                                                                                                                                         |
| YP_616590 | Sala_1544 | beta-lactamase                                             | 64.27%            | 17                      | R.EQSTLDLSTEFQVTA.R<br>R.RQDDIDSVADELSR.F<br>R.DDIDSVADELSR.F<br>R.RVEADGGLTLADDAQG.<br>R.KGETSGNGLTVEMR.V<br>R.ENPVDADLVIPVDSGTAAIYAQESGIPFELGIIR.S<br>R.IVLDSDIVR.G<br>K.LGDHILASETVLDVVGAEFLR.S<br>R.YSTTGETALR.N<br>R.GSIFQSTSDTEVIIHLVATSSYR.S<br>R.GQEAAGITAFDGKEFHTR.A<br>R.SVEPSELLIII.D<br>R.QLDGSAVGHVR.Y<br>R.NVQPLFADLSTGFAIAHNGNISNAALR.K<br>R.RGSIFQSTSDTEVIIHLVATSSYR.S<br>R.KAIGAELAR.E<br>R.DAGAAEVHMR.I<br>R.TFIQPDKVR.H<br>R.NVQPLFADLSTGFAIAHNGNISNAALR.L<br>R.IHAAGSATTIAPLDLTDGDSIAR.L<br>R.GIGAAIAESLAAR.G<br>R.SEELAGQIALVTGASR.G<br>R.TAGGLELEDR.I<br>R.TLTLNLIQAALIANFDPLLR.R<br>R.TAGGLELEDR.IHAAGSATTIAPLDLTDGDSIAR.L<br>R.LALSTSVAR.T<br>R.AYFGEDPQSIKEPAVGEVADLMVQGFDFSTAFHALPK.V<br>R.TAILEDGPTR.T<br>R.AYWGAYAASK.A<br>K.AAFEVLVTSYGAEMR.N<br>R.WQHLDMLVNAAMGLTLPVAAIDGKEFN.R.T<br>R.WQLHLDMLVNAAMGLTLPVAAIDGK.E<br>R.GAHVITAR.T<br>R.TLTLNLIQAALIANFDPLLR.A<br>K.AAFEVLVTSYGAEMR.N<br>K.TGETNLIQVLSATGK.T<br>K.SFTSTLVGAANK.D<br>K.LIVASHNGHWPTADPEGVGAAR.E<br>R.NAGLIIVQDGK.I<br>K.GSAYDDVSVR.Q<br>R.VVNPVIEAGDTAYPLPQGTPIDFGLDVAHMAK.Q<br>K.SLDDKVAAYIPGLK.G<br>K.SDVAGFMQLKPVAGEDITVSYMK.G<br>K.DLNVFWITQQR.D<br>K.WNEDYTDPK.S<br>K.AVQAADVREAK.<br>R.VVNPVIEAGDTAYPLPQGTPIDFGLDVAHMAK.Q<br>R.FGQFLNGGVAGSVNLPDDWLASATTK.Q<br>K.YALGHDAAGR.W<br>K.TLSQKLEK.I<br>R.GYGYQWNTNDDGSFAAQIFGQGFIDPK.R<br>K.VAAYIPGLK.G<br>R.VGTTSPSTPYGSVDRPAQPAALFAGAGAR.F<br>R.TTLTKDWETDQEV.R.W<br>R.SVAHMLVEMR.F<br>K.TVEVGDWQAGVIVHDVTNR.S<br>K.TADLQSLK.K<br>K.GJALDAEALHLK.T<br>R.FGEFPMALGVLYDPRPTEADVVR.Q<br>K.KGQWTVTEK.G<br>R.FPYMETYGFHTIHR.A<br>R.APAFATGLK.L<br>R.GFDVSKELPNVLA.A<br>K.LANPQLDIWITGDGDLGSLGIGNHTMHLIRR.N<br>K.DVFDFAAPK.G<br>R.VGTTSPSTPYGSVDR.P<br>R.TMPEIGTAPENTVFSGIGCSSR.F<br>R.NLDCQJMLFNNEIYGLK.G<br>R.FGEFPMALGVLYDPRPTEADVVR.Q<br>R.NLDCQJMLFNNEIYGLK.G<br>K.HGEMPLYAK.G<br>K.GQWTVTEK.G<br>K.LNISQLTLDVAVKPGFLGNK.E<br>K.VSQPFTIAEIEAAIEEALK.<br>R.TLTAEGALGLVAGQALR.L<br>K.VPDLTYEAFVPEFLTEVEGGFKPYGR.D<br>K.TNVPALPKGGLIIADEGEFNDR.N<br>K.APDLAANVAALNAGHAYGETAELAGPLK.Q<br>K.LAVVWGSTFGPIHQAVR.R<br>R.HIWRPANLGAALK.S<br>K.AKYDANLDDGSLAK.W<br>K.YDANPLDDGSLAK.W<br>K.GEAMGLAIMEPLVIVNSQR.G<br>R.DQYLVDARPNK.V<br>K.VPDQIVELGAEGK.L<br>K.TEQSDLYQAVYGR.N<br>K.QHIVDPAPEGLYR.T<br>R.IAVQYMTVMMLTDGYIANAEPWK.V<br>R.GGPSTGLPK.T<br>R.DRQQLIDWLNK.F<br>K.EVDTGHINYAPANQAMTDIRK.A<br>R.NGDAMPVIAAR.S<br>K.IDGKIPDQIVELGAEGK.L<br>R.LPMFFGGYPTPASALHLSLR.L<br>R.PWVRPGTPLLHR.I<br>R.GGPSTGLPKTEQSDLYQAVYGR.N<br>R.APQGTLVGSAFQINFGSAIDTAGDAPDVLVAMNPAALK.T<br>K.SYDKVIVPEMNTGQLK.T<br>K.EVDTGHINYAPANQAMTDIRK.K<br>R.SPQATECAEAECR.I<br>R.PGTPGLLHR.I<br>K.TVLRDQYLVDARPNK.V<br>K.TNVPALPKGGLIIADEGEFNDRNLAK.A<br>R.QSPLSDAVVR.F<br>R.QLDMPVIAVDYR.L<br>R.LAFEPHFAPEDECAATR.W<br>R.GEIAHVEDR.T<br>R.DFEGHLLK.G<br>R.DDWQSYRDFEGHLLK.G                                                                                                                                                                                                                                                                                                                                                                                                                                                                                                                                                                                                                                                                                         |
| YP_616593 | Sala_1547 | thiamine pyrophosphate enzyme-like TPP-binding             | 76.02%            | 20                      | R.EQSTLDLSTEFQVTA.R<br>R.RQDDIDSVADELSR.F<br>R.DDIDSVADELSR.F<br>R.RVEADGGLTLADDAQG.<br>R.KGETSGNGLTVEMR.V<br>R.ENPVDADLVIPVDSGTAAIYAQESGIPFELGIIR.S<br>R.IVLDSDIVR.G<br>K.LGDHILASETVLDVVGAEFLR.S<br>R.YSTTGETALR.N<br>R.GSIFQSTSDTEVIIHLVATSSYR.S<br>R.GQEAAGITAFDGKEFHTR.A<br>R.SVEPSELLIII.D<br>R.QLDGSAVGHVR.Y<br>R.NVQPLFADLSTGFAIAHNGNISNAALR.K<br>R.RGSIFQSTSDTEVIIHLVATSSYR.S<br>R.KAIGAELAR.E<br>R.DAGAAEVHMR.I<br>R.TFIQPDKVR.H<br>R.NVQPLFADLSTGFAIAHNGNISNAALR.L<br>R.IHAAGSATTIAPLDLTDGDSIAR.L<br>R.GIGAAIAESLAAR.G<br>R.SEELAGQIALVTGASR.G<br>R.TAGGLELEDR.I<br>R.TLTLNLIQAALIANFDPLLR.R<br>R.TAGGLELEDR.IHAAGSATTIAPLDLTDGDSIAR.L<br>R.LALSTSVAR.T<br>R.AYFGEDPQSIKEPAVGEVADLMVQGFDFSTAFHALPK.V<br>R.TAILEDGPTR.T<br>R.AYWGAYAASK.A<br>K.AAFEVLVTSYGAEMR.N<br>R.WQHLDMLVNAAMGLTLPVAAIDGKEFN.R.T<br>R.WQLHLDMLVNAAMGLTLPVAAIDGK.E<br>R.GAHVITAR.T<br>R.TLTLNLIQAALIANFDPLLR.A<br>K.AAFEVLVTSYGAEMR.N<br>K.TGETNLIQVLSATGK.T<br>K.SFTSTLVGAANK.D<br>K.LIVASHNGHWPTADPEGVGAAR.E<br>R.NAGLIIVQDGK.I<br>K.GSAYDDVSVR.Q<br>R.VVNPVIEAGDTAYPLPQGTPIDFGLDVAHMAK.Q<br>K.SLDDKVAAYIPGLK.G<br>K.SDVAGFMQLKPVAGEDITVSYMK.G<br>K.DLNVFWITQQR.D<br>K.WNEDYTDPK.S<br>K.AVQAADVREAK.<br>R.VVNPVIEAGDTAYPLPQGTPIDFGLDVAHMAK.Q<br>R.FGQFLNGGVAGSVNLPDDWLASATTK.Q<br>K.YALGHDAAGR.W<br>K.TLSQKLEK.I<br>R.GYGYQWNTNDDGSFAAQIFGQGFIDPK.R<br>K.VAAYIPGLK.G<br>R.VGTTSPSTPYGSVDRPAQPAALFAGAGAR.F<br>R.TTLTKDWETDQEV.R.W<br>R.SVAHMLVEMR.F<br>K.TVEVGDWQAGVIVHDVTNR.S<br>K.TADLQSLK.K<br>K.GJALDAEALHLK.T<br>R.FGEFPMALGVLYDPRPTEADVVR.Q<br>K.KGQWTVTEK.G<br>R.FPYMETYGFHTIHR.A<br>R.APAFATGLK.L<br>R.GFDVSKELPNVLA.A<br>K.LANPQLDIWITGDGDLGSLGIGNHTMHLIRR.N<br>K.DVFDFAAPK.G<br>R.VGTTSPSTPYGSVDR.P<br>R.TMPEIGTAPENTVFSGIGCSSR.F<br>R.NLDCQJMLFNNEIYGLK.G<br>R.FGEFPMALGVLYDPRPTEADVVR.Q<br>R.NLDCQJMLFNNEIYGLK.G<br>K.HGEMPLYAK.G<br>K.GQWTVTEK.G<br>K.LNISQLTLDVAVKPGFLGNK.E<br>K.VSQPFTIAEIEAAIEEALK.<br>R.TLTAEGALGLVAGQALR.L<br>K.VPDLTYEAFVPEFLTEVEGGFKPYGR.D<br>K.TNVPALPKGGLIIADEGEFNDR.N<br>K.APDLAANVAALNAGHAYGETAELAGPLK.Q<br>K.LAVVWGSTFGPIHQAVR.R<br>R.HIWRPANLGAALK.S<br>K.AKYDANLDDGSLAK.W<br>K.YDANPLDDGSLAK.W<br>K.GEAMGLAIMEPLVIVNSQR.G<br>R.DQYLVDARPNK.V<br>K.VPDQIVELGAEGK.L<br>K.TEQSDLYQAVYGR.N<br>K.QHIVDPAPEGLYR.T<br>R.IAVQYMTVMMLTDGYIANAEPWK.V<br>R.GGPSTGLPK.T<br>R.DRQQLIDWLNK.F<br>K.EVDTGHINYAPANQAMTDIRK.A<br>R.NGDAMPVIAAR.S<br>K.IDGKIPDQIVELGAEGK.L<br>R.LPMFFGGYPTPASALHLSLR.L<br>R.PWVRPGTPLLHR.I<br>R.GGPSTGLPKTEQSDLYQAVYGR.N<br>R.APQGTLVGSAFQINFGSAIDTAGDAPDVLVAMNPAALK.T<br>K.SYDKVIVPEMNTGQLK.T<br>K.EVDTGHINYAPANQAMTDIRK.K<br>R.SPQATECAEAECR.I<br>R.PGTPGLLHR.I<br>K.TVLRDQYLVDARPNK.V<br>K.TNVPALPKGGLIIADEGEFNDRNLAK.A<br>R.QSPLSDAVVR.F<br>R.QLDMPVIAVDYR.L<br>R.LAFEPHFAPEDECAATR.W<br>R.GEIAHVEDR.T<br>R.DFEGHLLK.G<br>R.DDWQSYRDFEGHLLK.G                                                                                                                                                                                                                                                                                                                                                                                                                                                                                                                                                                                                                                                                                         |
| YP_616594 | Sala_1548 | pyruvate flavodoxin/ferredoxin oxidoreductase-like protein | 75.68%            | 32                      | R.EQSTLDLSTEFQVTA.R<br>R.RQDDIDSVADELSR.F<br>R.DDIDSVADELSR.F<br>R.RVEADGGLTLADDAQG.<br>R.KGETSGNGLTVEMR.V<br>R.ENPVDADLVIPVDSGTAAIYAQESGIPFELGIIR.S<br>R.IVLDSDIVR.G<br>K.LGDHILASETVLDVVGAEFLR.S<br>R.YSTTGETALR.N<br>R.GSIFQSTSDTEVIIHLVATSSYR.S<br>R.GQEAAGITAFDGKEFHTR.A<br>R.SVEPSELLIII.D<br>R.QLDGSAVGHVR.Y<br>R.NVQPLFADLSTGFAIAHNGNISNAALR.K<br>R.RGSIFQSTSDTEVIIHLVATSSYR.S<br>R.KAIGAELAR.E<br>R.DAGAAEVHMR.I<br>R.TFIQPDKVR.H<br>R.NVQPLFADLSTGFAIAHNGNISNAALR.L<br>R.IHAAGSATTIAPLDLTDGDSIAR.L<br>R.GIGAAIAESLAAR.G<br>R.SEELAGQIALVTGASR.G<br>R.TAGGLELEDR.I<br>R.TLTLNLIQAALIANFDPLLR.R<br>R.TAGGLELEDR.IHAAGSATTIAPLDLTDGDSIAR.L<br>R.LALSTSVAR.T<br>R.AYFGEDPQSIKEPAVGEVADLMVQGFDFSTAFHALPK.V<br>R.TAILEDGPTR.T<br>R.AYWGAYAASK.A<br>K.AAFEVLVTSYGAEMR.N<br>R.WQHLDMLVNAAMGLTLPVAAIDGKEFN.R.T<br>R.WQLHLDMLVNAAMGLTLPVAAIDGK.E<br>R.GAHVITAR.T<br>R.TLTLNLIQAALIANFDPLLR.A<br>K.AAFEVLVTSYGAEMR.N<br>K.TGETNLIQVLSATGK.T<br>K.SFTSTLVGAANK.D<br>K.LIVASHNGHWPTADPEGVGAAR.E<br>R.NAGLIIVQDGK.I<br>K.GSAYDDVSVR.Q<br>R.VVNPVIEAGDTAYPLPQGTPIDFGLDVAHMAK.Q<br>K.SLDDKVAAYIPGLK.G<br>K.SDVAGFMQLKPVAGEDITVSYMK.G<br>K.DLNVFWITQQR.D<br>K.WNEDYTDPK.S<br>K.AVQAADVREAK.<br>R.VVNPVIEAGDTAYPLPQGTPIDFGLDVAHMAK.Q<br>R.FGQFLNGGVAGSVNLPDDWLASATTK.Q<br>K.YALGHDAAGR.W<br>K.TLSQKLEK.I<br>R.GYGYQWNTNDDGSFAAQIFGQGFIDPK.R<br>K.VAAYIPGLK.G                                                                                                                                                                                                                                                                                                                                                                                                                                                                                                                                                                                                                                                                                                                                                                                                                                                                                                                                                                                                                                                                                                                                                                                                                                                                                                                                                                                                                                                                                                                                                                                                                                                                                                                                                                                                                                                                                                                                                                                                                                                                                                                             |

| Accession | Locus tag | Description                           | Sequence coverage | No. peptides identified | List of peptides identified                                                                                                                                                                                                                                                                                                                                                                                                                                                                                                                                                                                                                                                                                                                                                                                                                                                                                                                                                                                                                                                                                                                                                                                                                                                                                                                                                                                                                                                                                                                                                                                                                                                                                                                                                                                                                                                                                                                                                                                                                                                                                                                                                                                                                                                                                                                                                                                                                                                                                                                                                                                                                                                                                                                                                                                                                                                                                                                                                                                                                                                                                                                                                                                                                                                                          |
|-----------|-----------|---------------------------------------|-------------------|-------------------------|------------------------------------------------------------------------------------------------------------------------------------------------------------------------------------------------------------------------------------------------------------------------------------------------------------------------------------------------------------------------------------------------------------------------------------------------------------------------------------------------------------------------------------------------------------------------------------------------------------------------------------------------------------------------------------------------------------------------------------------------------------------------------------------------------------------------------------------------------------------------------------------------------------------------------------------------------------------------------------------------------------------------------------------------------------------------------------------------------------------------------------------------------------------------------------------------------------------------------------------------------------------------------------------------------------------------------------------------------------------------------------------------------------------------------------------------------------------------------------------------------------------------------------------------------------------------------------------------------------------------------------------------------------------------------------------------------------------------------------------------------------------------------------------------------------------------------------------------------------------------------------------------------------------------------------------------------------------------------------------------------------------------------------------------------------------------------------------------------------------------------------------------------------------------------------------------------------------------------------------------------------------------------------------------------------------------------------------------------------------------------------------------------------------------------------------------------------------------------------------------------------------------------------------------------------------------------------------------------------------------------------------------------------------------------------------------------------------------------------------------------------------------------------------------------------------------------------------------------------------------------------------------------------------------------------------------------------------------------------------------------------------------------------------------------------------------------------------------------------------------------------------------------------------------------------------------------------------------------------------------------------------------------------------------------|
| YP_616596 | Sala_1550 | NUDIX hydrolase                       | 41.77%            | 5                       | R.ASPDLFPAEGLPPTLLVTAGLDPLR.D<br>K.LIEAGVTSFR.E<br>K.AIVADANAAA.<br>R.SREEFYDLPDHLIGK.M<br>R.ELGEETGIHGGLVDIAR.S<br>R.GLIEEFFPLV.<br>R.FMGEDSDIHTR.H<br>R.WVDLGEIEK.L<br>R.TGRPFTGDIAGDILLFR.A<br>R.LTPEMFADVFR.T<br>R.IDDGLTLDGAIIVNSVK.C<br>R.IAHVAVLR.A<br>R.YSLENPAAYVHSNIAGHVNIELAR.H<br>K.RADELLETSEYVHLFR.I<br>R.DLGFAPTTPIISVGIPIAFVWYR.T<br>K.AVGESVAEPIR.Y<br>R.LVFSSSATVYGEQVLPDDEHPTAATNPYGR.T<br>R.GHAIEAVIHFAGLK.A<br>R.VNGVAIPYR.I<br>R.LEAITGAVIPLVGDIR.D<br>K.ELSVFGDDYDTPDGTGVR.D<br>R.VTGGQGSYAPDQGR.L<br>R.IISDGLAAVGGSLDLR.L<br>R.DFLGGNATASGDVRYGTDGVVR.F<br>R.ITSLIQEGSLSGR.F<br>R.FGGIETGLDAFDADHVAVALR.F<br>K.LPEEGYFPAQVQGR.D<br>K.FTYAYVELLATREDDYDFATGER.S<br>R.VAFVFEIDYVAAHLGVDSR.Q<br>R.QSPVDPVEIEDYLANK.Q<br>R.ITDDLADVVDKYSR.D<br>K.DVPQNLQAIIVSSNTR.K<br>R.IIVGNTHPR.A<br>R.ALHNDLHPSR.I<br>R.LLLEGLSPDTAVLQGTNTEAEAIK.L<br>K.QMLANYKDPQNLQAIIVSSNTR.K<br>R.KDFVASEVIK.R<br>R.AEHGSDIVFSEFLR.E<br>K.QAAYADANFVIVATPTDYDPTNYFNNTNSVESVIADALK.L<br>K.GIEVYVPEVAEDR.L<br>R.ITDLDADVDK.V<br>R.DLDAFKAEADVIANR.I<br>K.LFANTYLAMR.V<br>K.IAVVGTGYVGINAVLLAQHNAVVALDIDTR.K<br>K.AEADVIANR.I<br>R.ALLGVEIAPGAR.F<br>R.FAANTVFSIDATGR.Y<br>K.LGLSTSAGDDAELDR.L<br>R.HFPDLADAANPHLALLDR.V<br>R.GVDADLAR.V<br>R.VVSNFVQALHGEDITIYDGGSQTR.S<br>K.AQLGWEPVTELDGLDR.T<br>R.VLVFGAGFLGSHLDR.L<br>K.SNLDHLAGNPLFEFMR.H<br>K.TSVHGAINMLGAK.R<br>R.IFNTPGR.M<br>K.VPIFQASTSEVYGDPTMHPQESYWGNNPIGIR.S<br>R.RVLVTGGAGFLGSHLDR.L<br>R.QPLQDDPLQR.Q<br>R.GDEVLCVDFLFTGDK.S<br>R.AKALGWEPVTELDGLDR.T<br>R.SCYDEGR.C<br>R.CAETLFFDYHR.Q<br>K.TSVHGAINMLGAK.R<br>K.IQALVGNLGAFAVVR.D<br>R.FETYESHFSGR.S<br>K.LFLVDTEGGVLSSEGR.A<br>R.ASHVGSYAEMLDLLR.S<br>R.SNVLDGEGPVLDALNGAR.A<br>R.IMAAMJALVDDLAR.D<br>R.FDPYTGILR.E<br>R.ASPEADIATYTSFGSDLLSGYFFWGDR.L<br>R.VAQPYFHLNDGMAAQRVAAILAR.K<br>R.IGLIVDPTR.D<br>R.DLPGMVLGFLHAR.H<br>R.GFAVTAANDVARPPASELEAVLR.A<br>K.TGAEAGLIGLPVVLGDAFYR.E<br>R.SIVAQSAJADAQR.N<br>R.EGDFAPVIPADAR.A<br>R.ADHGADFSAYLQK.T<br>R.LALIDPGTNNYAVMR.R<br>R.TFTDTLSYLR.A<br>R.FWALVGEDLR.A<br>R.LDWFAGAWELSRGELYVTGADEV.R.T<br>K.RQEFEGFIGHAATHVK.A<br>R.SPEYLDQLALVDYICR.H<br>R.HFFIEPFFR.G<br>R.AGVTNLAYWTSHER.F<br>K.LVDGEASCSAGPAR.L<br>R.TFTDTLSYLR.A<br>R.PGELVTGADEV.R.T<br>R.LDWFAGAWELSR.P<br>R.GFAHFVSDDR.S<br>K.TLADGQVVPK.K<br>K.LAGHYTPLDLIDDFLYPLHVPGDIALTLR.S<br>K.KDAHHYNAAWK.K<br>R.ALLGNATATSTVIVDR.Q<br>R.WLAFDSDDLWPEK.L<br>K.LSPLAAAWYFAQYSAR.A<br>R.INAEGSETGR.Y<br>R.WLAFDSDDLWPEKLER.Q<br>R.LLQHPVNGGPAAR.N<br>R.TRODAVISTFGR.R<br>R.RINAEGSETGR.Y<br>R.LLEATEQLIADDASER.I<br>R.LAGQGDISHR.R<br>R.DGFVLLDDYVSTELR.T<br>R.RDDQLPTSINVASAK.R<br>R.LAELFPADHVEK.I<br>R.DDQLPTSINVASAK.R<br>R.ADPAADVIER.A<br>K.IVADFERDGFVLLDDYVSTELR.T<br>K.GSLWAHLVER.A<br>R.FALQSEIVR.L<br>R.WITATLADGLDPGDLIADLAK.L<br>R.YGVVPIEDAESAELGSLTR.G<br>R.QVDGQLLQSGTLR.D<br>R.QAFESNWIAPLGNVDAFER.E<br>R.FLQTVTDGDIRR.L<br>R.VGIFSFNGNK.I<br>R.LLAGITLDSPTDHR.D<br>R.HSIDQLPLLDGAGR.V<br>R.MSNVLGIGR.G<br>R.LNETGLLILHVDASGR.F<br>R.EVAATGVASAAALSSGTAIHLALILLGVGAGDR.V<br>R.DSTSITAPDGIIDEAALMADR.H<br>R.VGGLR.R<br>R.MSNVLGIGR.G<br>R.GLCLPSGSSMTAAQVDR.V<br>R.EALADVESFVWMPFAGSQSNR.W<br>R.DVAADIFSR.G<br>K.IITTSGGMLVADDPEITAHAR.K<br>K.AVIVDLYGQPADYDR.L<br>K.DVPANSLWGNPATDR.R<br>R.FADHFLVAIGAPR.S<br>K.IIVATGGLGR.E<br>R.EGWDVAGLDDDEALQGGVCDVPVLGR.V |
| YP_616597 | Sala_1551 | Uracil-DNA glycosylase superfamily    | 23.64%            | 4                       |                                                                                                                                                                                                                                                                                                                                                                                                                                                                                                                                                                                                                                                                                                                                                                                                                                                                                                                                                                                                                                                                                                                                                                                                                                                                                                                                                                                                                                                                                                                                                                                                                                                                                                                                                                                                                                                                                                                                                                                                                                                                                                                                                                                                                                                                                                                                                                                                                                                                                                                                                                                                                                                                                                                                                                                                                                                                                                                                                                                                                                                                                                                                                                                                                                                                                                      |
| YP_616599 | Sala_1553 | NAD-dependent epimerase/dehydratase   | 18.51%            | 3                       |                                                                                                                                                                                                                                                                                                                                                                                                                                                                                                                                                                                                                                                                                                                                                                                                                                                                                                                                                                                                                                                                                                                                                                                                                                                                                                                                                                                                                                                                                                                                                                                                                                                                                                                                                                                                                                                                                                                                                                                                                                                                                                                                                                                                                                                                                                                                                                                                                                                                                                                                                                                                                                                                                                                                                                                                                                                                                                                                                                                                                                                                                                                                                                                                                                                                                                      |
| YP_616605 | Sala_1559 | UDP-glucose 4-epimerase               | 29.88%            | 6                       |                                                                                                                                                                                                                                                                                                                                                                                                                                                                                                                                                                                                                                                                                                                                                                                                                                                                                                                                                                                                                                                                                                                                                                                                                                                                                                                                                                                                                                                                                                                                                                                                                                                                                                                                                                                                                                                                                                                                                                                                                                                                                                                                                                                                                                                                                                                                                                                                                                                                                                                                                                                                                                                                                                                                                                                                                                                                                                                                                                                                                                                                                                                                                                                                                                                                                                      |
| YP_616607 | Sala_1561 | protein of unknown function DUF490    | 3.91%             | 3                       |                                                                                                                                                                                                                                                                                                                                                                                                                                                                                                                                                                                                                                                                                                                                                                                                                                                                                                                                                                                                                                                                                                                                                                                                                                                                                                                                                                                                                                                                                                                                                                                                                                                                                                                                                                                                                                                                                                                                                                                                                                                                                                                                                                                                                                                                                                                                                                                                                                                                                                                                                                                                                                                                                                                                                                                                                                                                                                                                                                                                                                                                                                                                                                                                                                                                                                      |
| YP_616608 | Sala_1562 | surface antigen (D15)                 | 9.50%             | 4                       |                                                                                                                                                                                                                                                                                                                                                                                                                                                                                                                                                                                                                                                                                                                                                                                                                                                                                                                                                                                                                                                                                                                                                                                                                                                                                                                                                                                                                                                                                                                                                                                                                                                                                                                                                                                                                                                                                                                                                                                                                                                                                                                                                                                                                                                                                                                                                                                                                                                                                                                                                                                                                                                                                                                                                                                                                                                                                                                                                                                                                                                                                                                                                                                                                                                                                                      |
| YP_616609 | Sala_1563 | UDP-glucose 6-dehydrogenase           | 64.23%            | 17                      |                                                                                                                                                                                                                                                                                                                                                                                                                                                                                                                                                                                                                                                                                                                                                                                                                                                                                                                                                                                                                                                                                                                                                                                                                                                                                                                                                                                                                                                                                                                                                                                                                                                                                                                                                                                                                                                                                                                                                                                                                                                                                                                                                                                                                                                                                                                                                                                                                                                                                                                                                                                                                                                                                                                                                                                                                                                                                                                                                                                                                                                                                                                                                                                                                                                                                                      |
| YP_616610 | Sala_1564 | protein of unknown function UPF0061   | 14.78%            | 5                       |                                                                                                                                                                                                                                                                                                                                                                                                                                                                                                                                                                                                                                                                                                                                                                                                                                                                                                                                                                                                                                                                                                                                                                                                                                                                                                                                                                                                                                                                                                                                                                                                                                                                                                                                                                                                                                                                                                                                                                                                                                                                                                                                                                                                                                                                                                                                                                                                                                                                                                                                                                                                                                                                                                                                                                                                                                                                                                                                                                                                                                                                                                                                                                                                                                                                                                      |
| YP_616612 | Sala_1566 | NAD-dependent epimerase/dehydratase   | 56.11%            | 14                      |                                                                                                                                                                                                                                                                                                                                                                                                                                                                                                                                                                                                                                                                                                                                                                                                                                                                                                                                                                                                                                                                                                                                                                                                                                                                                                                                                                                                                                                                                                                                                                                                                                                                                                                                                                                                                                                                                                                                                                                                                                                                                                                                                                                                                                                                                                                                                                                                                                                                                                                                                                                                                                                                                                                                                                                                                                                                                                                                                                                                                                                                                                                                                                                                                                                                                                      |
| YP_616613 | Sala_1567 | hypothetical protein                  | 37.31%            | 11                      |                                                                                                                                                                                                                                                                                                                                                                                                                                                                                                                                                                                                                                                                                                                                                                                                                                                                                                                                                                                                                                                                                                                                                                                                                                                                                                                                                                                                                                                                                                                                                                                                                                                                                                                                                                                                                                                                                                                                                                                                                                                                                                                                                                                                                                                                                                                                                                                                                                                                                                                                                                                                                                                                                                                                                                                                                                                                                                                                                                                                                                                                                                                                                                                                                                                                                                      |
| YP_616615 | Sala_1569 | hypothetical protein                  | 61.98%            | 21                      |                                                                                                                                                                                                                                                                                                                                                                                                                                                                                                                                                                                                                                                                                                                                                                                                                                                                                                                                                                                                                                                                                                                                                                                                                                                                                                                                                                                                                                                                                                                                                                                                                                                                                                                                                                                                                                                                                                                                                                                                                                                                                                                                                                                                                                                                                                                                                                                                                                                                                                                                                                                                                                                                                                                                                                                                                                                                                                                                                                                                                                                                                                                                                                                                                                                                                                      |
| YP_616616 | Sala_1570 | glycosyl transferase, family 2        | 35.32%            | 8                       |                                                                                                                                                                                                                                                                                                                                                                                                                                                                                                                                                                                                                                                                                                                                                                                                                                                                                                                                                                                                                                                                                                                                                                                                                                                                                                                                                                                                                                                                                                                                                                                                                                                                                                                                                                                                                                                                                                                                                                                                                                                                                                                                                                                                                                                                                                                                                                                                                                                                                                                                                                                                                                                                                                                                                                                                                                                                                                                                                                                                                                                                                                                                                                                                                                                                                                      |
| YP_616617 | Sala_1571 | hypothetical protein                  | 35.93%            | 10                      |                                                                                                                                                                                                                                                                                                                                                                                                                                                                                                                                                                                                                                                                                                                                                                                                                                                                                                                                                                                                                                                                                                                                                                                                                                                                                                                                                                                                                                                                                                                                                                                                                                                                                                                                                                                                                                                                                                                                                                                                                                                                                                                                                                                                                                                                                                                                                                                                                                                                                                                                                                                                                                                                                                                                                                                                                                                                                                                                                                                                                                                                                                                                                                                                                                                                                                      |
| YP_616619 | Sala_1573 | DegT/DnrJ/EryC1/StrS aminotransferase | 60.60%            | 19                      |                                                                                                                                                                                                                                                                                                                                                                                                                                                                                                                                                                                                                                                                                                                                                                                                                                                                                                                                                                                                                                                                                                                                                                                                                                                                                                                                                                                                                                                                                                                                                                                                                                                                                                                                                                                                                                                                                                                                                                                                                                                                                                                                                                                                                                                                                                                                                                                                                                                                                                                                                                                                                                                                                                                                                                                                                                                                                                                                                                                                                                                                                                                                                                                                                                                                                                      |
| YP_616620 | Sala_1574 | putative serine O-acetyltransferase   | 31.80%            | 4                       |                                                                                                                                                                                                                                                                                                                                                                                                                                                                                                                                                                                                                                                                                                                                                                                                                                                                                                                                                                                                                                                                                                                                                                                                                                                                                                                                                                                                                                                                                                                                                                                                                                                                                                                                                                                                                                                                                                                                                                                                                                                                                                                                                                                                                                                                                                                                                                                                                                                                                                                                                                                                                                                                                                                                                                                                                                                                                                                                                                                                                                                                                                                                                                                                                                                                                                      |

| Accession | Locus tag | Description                             | Sequence coverage | No. peptides identified | List of peptides identified                                                                                                                                                                                                                                                                                                                                                                                                                                                                                                                                                                                                                                                                                                                                                                                                                                                                                                                                                                                                                                                                                                                                                                                                                                                                                                                                                                                                                                                                                                                                                                                                                                                                                                                                                                                                                                                                                                                                                                                                   |
|-----------|-----------|-----------------------------------------|-------------------|-------------------------|-------------------------------------------------------------------------------------------------------------------------------------------------------------------------------------------------------------------------------------------------------------------------------------------------------------------------------------------------------------------------------------------------------------------------------------------------------------------------------------------------------------------------------------------------------------------------------------------------------------------------------------------------------------------------------------------------------------------------------------------------------------------------------------------------------------------------------------------------------------------------------------------------------------------------------------------------------------------------------------------------------------------------------------------------------------------------------------------------------------------------------------------------------------------------------------------------------------------------------------------------------------------------------------------------------------------------------------------------------------------------------------------------------------------------------------------------------------------------------------------------------------------------------------------------------------------------------------------------------------------------------------------------------------------------------------------------------------------------------------------------------------------------------------------------------------------------------------------------------------------------------------------------------------------------------------------------------------------------------------------------------------------------------|
| YP_616621 | Sala_1575 | UDP-N-acetylglucosamine 2-epimerase     | 42.89%            | 11                      | R.SANVFDAPPESGAIGR.A<br>R.YGIDDEESFVLVLFHPVQQAAEAGAQWR.A<br>R.NVYGDPPHADIR.I<br>R.FLIGNSSSGLVEAATFGTPVWVNGDR.Q<br>R.AMFDALAGLPR.F<br>K.AIGFDPQGLR.N<br>R.MGEDPDRIFDVGAPGLVGLK.K<br>R.IVYLTGTR.A<br>R.ADFGLMLPTLR.A<br>R.SGSVDESIR.H<br>R.ADYLLAECR.F<br>K.IASGEIVNKLIDK.V<br>R.DHGPDHAASLEPAQLR.A<br>R.LVDIAVEAGADAVK.F<br>K.RPALELPTR.A<br>R.ALELDDAHER.L<br>R.TFVIAEAGVNHDSGLD.K.A<br>R.LDATTIAFLRPGDGI GPER.A<br>R.TDEVVTPDAAK.A<br>R.QTGAGTQYEMIR.A<br>R.NVEVALGDGVK.R<br>K.VAGSGRPIILSTGMAEMAEEVVR.A<br>R.SAFALTDINR.G<br>R.GDRLDATTIAFLRPGDGI GPER.A<br>R.GAAVIEK.H<br>K.FQTRTDEVVTPDAAK.A<br>R.VNAVTPGGVYSGQNETFVDR.Y<br>K.LWLTGAGGIIIGR.V<br>R.QVAEAEVNGAEHGPVDALFNWAGK.T<br>R.IYDGAQYGR.A<br>R.QGQTVNLTSLYIVGPDQR.I<br>R.AINSPAVYSAAK.A<br>R.CEQALTAAR.E<br>K.AGLWGLTK.Y<br>R.HLVEHVEAEYGVDR.I<br>R.AAGASLPYLKPAELATDTAGK.I<br>R.IVDLDPSTPLR.L<br>R.HALGNVLWSEPR.L<br>R.SESGHVVAR.Q<br>R.IDHVIVSTDSAEADIAAR.A<br>R.QAAPPYAMIASIYVWK.R<br>K.RSESGHVVAR.Q<br>K.PLVHTIEMALHSR.I<br>R.HFDLPLGLLAAGVPTLIEKPVVIR.A<br>R.AADGLPVEALDYSR.T<br>R.SSLHITSEDLHLR.A<br>R.LADAHEVYDK.G<br>R.GIEVGEDATAVLDFR.A<br>K.TPGNEEQR.L<br>R.AGQQIADEDIQR.S<br>R.NIAPLIVFAEEDIVSALR.K<br>R.YHNLFLSAEDIVR.F<br>R.VSLLPDEFSAHVR.A<br>R.SPGQGLQPYFR.A<br>K.LSGGVVYSGHER.G<br>K.DGASEDELNDFSDR.V<br>R.NIAPLIVFAEEDIVSALR.K.I<br>K.SARPPHINAGGFSADGPTAER.R<br>R.GYTFPAARAVAMGAK.V<br>K.DINLAYR.R<br>R.NEGSDSDASADLGAQYTLDLLSR.F<br>K.LEAVLTDGVR.R<br>K.DGASEDELNDFSDRVTVPVVDGQR.H<br>R.VTFVPIVDGQR.H<br>R.EVEEAMGYGAR.G<br>K.TSFQELLR.Q<br>R.LEAVMPYK.L<br>K.LASADLTHPLLSAMAR.T<br>R.ETAPDASFIPEIWQGHK.D<br>K.LEAVLTDGVR.R.W<br>R.GITQGEHMR.E<br>R.ETAPDASFIPEIWQGHKDDGAGFWQALDR.L<br>R.YHDLQK.M<br>R.VIGPESPIAIEIGNHNGSIELAK.R<br>R.FDRPFGVPR.Y<br>R.DMIEGDFFFQSDLADAVASAR.D<br>R.RPAMYDR.I<br>R.LVELAVEKAGCAK.F<br>R.LDKEGEIIPTMPPYWHFGQR.Y<br>R.HTAPVLLHCNSTYPAPFK.D<br>R.GITQGEHMR.E<br>R.EVEEAMGYGAR.G<br>K.HFTVDR.G<br>K.DDAGSFWQALDR.L<br>R.RQDIAEADR.H<br>K.GRYEAILLQPTSPLR.L<br>R.SFGAQVFLRPAELATDTAPTEPVMHLTLER.M<br>R.YEAILLQPTSPLR.L |
| YP_616622 | Sala_1576 | N-acyleuraminatase-9-phosphate synthase | 52.00%            | 15                      | R.LVLAGPLISWASIEQALAAHGVTDVVSTDAEDIAAVAR.S<br>K.FLDNADAGLADLDR.A<br>R.AQGYQQLIDILVSAR.E<br>R.ELALEGLSQSALNSAALR.Q<br>R.DAPTAAMTALLSR.V<br>R.VADIVSAIPAR.S<br>R.YGIDNVPFAPR.V<br>R.QPVTMALVPIWHSTAPATADR.L<br>R.ALTYSEKVDLVLPIILQASSDPEALAQIR.R<br>R.SRPGSYSLR.A<br>R.MGGGAFRPIDQLTENYDAGGR.E<br>R.LMLAAQEK.F<br>R.DVLAVQQAIEK.F<br>K.VYDVSPTR.Q<br>R.AREVEAAGR.L<br>R.RDVLAVQQAIEK.F<br>R.QGASLSPLR.Q<br>R.EVDIFASPER.Q<br>K.NITNVVIESEATGR.N<br>R.IPDQLGLPLGSPVK.V<br>R.VALSQVLDQR.R<br>R.SAGAPLIGVILTK.L<br>R.RIDELDQSIAR.E<br>R.NIVTIGNNENGAGSTAQIR.E<br>R.TLAADSLSSLNSELVK.A<br>K.SISLSLATVLR.V<br>R.IVTDTLLDHWVSPTR.G<br>R.ALVDFASSR.N<br>K.SSLAFSTSHGIPR.S<br>R.YKEIGVAGVSANNIAVIDR.A<br>R.SIMVSSQPAEGK.S<br>R.NLEFYQTQYSLMEAR.S<br>R.EVWPNLDFIRAGSPSPSAELLSSDR.M<br>R.DHGVSNVLAGEDDYRPLR.E<br>R.DAIQYNIYQR.E<br>R.AKDASEYALMQQDFPGYPVAMALQR.R<br>R.PLATLAGEESGAGPQGSKPLILEYHIFK.R<br>R.LETNENFWAAGHIDMSDFSDADAR.S<br>R.KFDSTAEAR.S<br>K.SNVSEAYFAIK.S<br>K.VEEGVAIVEIRDPK.S<br>K.EIGVAGVSANNIAVIDR.A<br>R.RDAIQYNIYQR.E<br>R.IDELDQSIAR.E<br>R.DSEYGVYAYSYEYTSR.G<br>K.HYDHWVDSAPILGLADAPLLSR.T<br>R.QRVESER.A<br>R.GSALVDVSYSSYPESAQIANAWANEFIAQSIAR.K<br>R.AAVERENNLK.A                                                                                                                                                                                                                                                                                                                                                                                                                                                                                                                                                                                                                                                                                                                                                                                                                                              |
| YP_616623 | Sala_1577 | short-chain dehydrogenase/reductase SDR | 44.53%            | 8                       | R.HFDTLPLGLLAAGVPTLIEKPVVIR.A<br>R.AADGLPVEALDYSR.T<br>R.SSLHITSEDLHLR.A<br>R.LADAHEVYDK.G<br>R.GIEVGEDATAVLDFR.A<br>K.TPGNEEQR.L<br>R.AGQQIADEDIQR.S<br>R.NIAPLIVFAEEDIVSALR.K<br>R.YHNLFLSAEDIVR.F<br>R.VSLLPDEFSAHVR.A<br>R.SPGQGLQPYFR.A<br>K.LSGGVVYSGHER.G<br>K.DGASEDELNDFSDR.V<br>R.NIAPLIVFAEEDIVSALR.K.I<br>K.SARPPHINAGGFSADGPTAER.R<br>R.GYTFPAARAVAMGAK.V<br>K.DINLAYR.R<br>R.NEGSDSDASADLGAQYTLDLLSR.F<br>K.LEAVLTDGVR.R<br>K.DGASEDELNDFSDRVTVPVVDGQR.H<br>R.VTFVPIVDGQR.H<br>R.EVEEAMGYGAR.G<br>K.TSFQELLR.Q<br>R.LEAVMPYK.L<br>K.LASADLTHPLLSAMAR.T<br>R.ETAPDASFIPEIWQGHK.D<br>K.LEAVLTDGVR.R.W<br>R.GITQGEHMR.E<br>R.ETAPDASFIPEIWQGHKDDGAGFWQALDR.L<br>R.YHDLQK.M<br>R.VIGPESPIAIEIGNHNGSIELAK.R<br>R.FDRPFGVPR.Y<br>R.DMIEGDFFFQSDLADAVASAR.D<br>R.RPAMYDR.I<br>R.LVELAVEKAGCAK.F<br>R.LDKEGEIIPTMPPYWHFGQR.Y<br>R.HTAPVLLHCNSTYPAPFK.D<br>R.GITQGEHMR.E<br>R.EVEEAMGYGAR.G<br>K.HFTVDR.G<br>K.DDAGSFWQALDR.L<br>R.RQDIAEADR.H<br>K.GRYEAILLQPTSPLR.L<br>R.SFGAQVFLRPAELATDTAPTEPVMHLTLER.M<br>R.YEAILLQPTSPLR.L                                                                                                                                                                                                                                                                                                                                                                                                                                                                                                                                                                                                                                                                                                                                                                                                                                                                                                                                                                                         |
| YP_616624 | Sala_1578 | Acyleuraminatase cytidilyltransferase   | 52.17%            | 9                       | R.HFDTLPLGLLAAGVPTLIEKPVVIR.A<br>R.AADGLPVEALDYSR.T<br>R.SSLHITSEDLHLR.A<br>R.LADAHEVYDK.G<br>R.GIEVGEDATAVLDFR.A<br>K.TPGNEEQR.L<br>R.AGQQIADEDIQR.S<br>R.NIAPLIVFAEEDIVSALR.K<br>R.YHNLFLSAEDIVR.F<br>R.VSLLPDEFSAHVR.A<br>R.SPGQGLQPYFR.A<br>K.LSGGVVYSGHER.G<br>K.DGASEDELNDFSDR.V<br>R.NIAPLIVFAEEDIVSALR.K.I<br>K.SARPPHINAGGFSADGPTAER.R<br>R.GYTFPAARAVAMGAK.V<br>K.DINLAYR.R<br>R.NEGSDSDASADLGAQYTLDLLSR.F<br>K.LEAVLTDGVR.R<br>K.DGASEDELNDFSDRVTVPVVDGQR.H<br>R.VTFVPIVDGQR.H<br>R.EVEEAMGYGAR.G<br>K.TSFQELLR.Q<br>R.LEAVMPYK.L<br>K.LASADLTHPLLSAMAR.T<br>R.ETAPDASFIPEIWQGHK.D<br>K.LEAVLTDGVR.R.W<br>R.GITQGEHMR.E<br>R.ETAPDASFIPEIWQGHKDDGAGFWQALDR.L<br>R.YHDLQK.M<br>R.VIGPESPIAIEIGNHNGSIELAK.R<br>R.FDRPFGVPR.Y<br>R.DMIEGDFFFQSDLADAVASAR.D<br>R.RPAMYDR.I<br>R.LVELAVEKAGCAK.F<br>R.LDKEGEIIPTMPPYWHFGQR.Y<br>R.HTAPVLLHCNSTYPAPFK.D<br>R.GITQGEHMR.E<br>R.EVEEAMGYGAR.G<br>K.HFTVDR.G<br>K.DDAGSFWQALDR.L<br>R.RQDIAEADR.H<br>K.GRYEAILLQPTSPLR.L<br>R.SFGAQVFLRPAELATDTAPTEPVMHLTLER.M<br>R.YEAILLQPTSPLR.L                                                                                                                                                                                                                                                                                                                                                                                                                                                                                                                                                                                                                                                                                                                                                                                                                                                                                                                                                                                         |
| YP_616625 | Sala_1579 | oxidoreductase-like protein             | 27.33%            | 6                       | R.HFDTLPLGLLAAGVPTLIEKPVVIR.A<br>R.AADGLPVEALDYSR.T<br>R.SSLHITSEDLHLR.A<br>R.LADAHEVYDK.G<br>R.GIEVGEDATAVLDFR.A<br>K.TPGNEEQR.L<br>R.AGQQIADEDIQR.S<br>R.NIAPLIVFAEEDIVSALR.K<br>R.YHNLFLSAEDIVR.F<br>R.VSLLPDEFSAHVR.A<br>R.SPGQGLQPYFR.A<br>K.LSGGVVYSGHER.G<br>K.DGASEDELNDFSDR.V<br>R.NIAPLIVFAEEDIVSALR.K.I<br>K.SARPPHINAGGFSADGPTAER.R<br>R.GYTFPAARAVAMGAK.V<br>K.DINLAYR.R<br>R.NEGSDSDASADLGAQYTLDLLSR.F<br>K.LEAVLTDGVR.R<br>K.DGASEDELNDFSDRVTVPVVDGQR.H<br>R.VTFVPIVDGQR.H<br>R.EVEEAMGYGAR.G<br>K.TSFQELLR.Q<br>R.LEAVMPYK.L<br>K.LASADLTHPLLSAMAR.T<br>R.ETAPDASFIPEIWQGHK.D<br>K.LEAVLTDGVR.R.W<br>R.GITQGEHMR.E<br>R.ETAPDASFIPEIWQGHKDDGAGFWQALDR.L<br>R.YHDLQK.M<br>R.VIGPESPIAIEIGNHNGSIELAK.R<br>R.FDRPFGVPR.Y<br>R.DMIEGDFFFQSDLADAVASAR.D<br>R.RPAMYDR.I<br>R.LVELAVEKAGCAK.F<br>R.LDKEGEIIPTMPPYWHFGQR.Y<br>R.HTAPVLLHCNSTYPAPFK.D<br>R.GITQGEHMR.E<br>R.EVEEAMGYGAR.G<br>K.HFTVDR.G<br>K.DDAGSFWQALDR.L<br>R.RQDIAEADR.H<br>K.GRYEAILLQPTSPLR.L<br>R.SFGAQVFLRPAELATDTAPTEPVMHLTLER.M<br>R.YEAILLQPTSPLR.L                                                                                                                                                                                                                                                                                                                                                                                                                                                                                                                                                                                                                                                                                                                                                                                                                                                                                                                                                                                         |
| YP_616626 | Sala_1580 | N-acyleuraminatase-9-phosphate synthase | 54.34%            | 35                      | R.HFDTLPLGLLAAGVPTLIEKPVVIR.A<br>R.AADGLPVEALDYSR.T<br>R.SSLHITSEDLHLR.A<br>R.LADAHEVYDK.G<br>R.GIEVGEDATAVLDFR.A<br>K.TPGNEEQR.L<br>R.AGQQIADEDIQR.S<br>R.NIAPLIVFAEEDIVSALR.K<br>R.YHNLFLSAEDIVR.F<br>R.VSLLPDEFSAHVR.A<br>R.SPGQGLQPYFR.A<br>K.LSGGVVYSGHER.G<br>K.DGASEDELNDFSDR.V<br>R.NIAPLIVFAEEDIVSALR.K.I<br>K.SARPPHINAGGFSADGPTAER.R<br>R.GYTFPAARAVAMGAK.V<br>K.DINLAYR.R<br>R.NEGSDSDASADLGAQYTLDLLSR.F<br>K.LEAVLTDGVR.R<br>K.DGASEDELNDFSDRVTVPVVDGQR.H<br>R.VTFVPIVDGQR.H<br>R.EVEEAMGYGAR.G<br>K.TSFQELLR.Q<br>R.LEAVMPYK.L<br>K.LASADLTHPLLSAMAR.T<br>R.ETAPDASFIPEIWQGHK.D<br>K.LEAVLTDGVR.R.W<br>R.GITQGEHMR.E<br>R.ETAPDASFIPEIWQGHKDDGAGFWQALDR.L<br>R.YHDLQK.M<br>R.VIGPESPIAIEIGNHNGSIELAK.R<br>R.FDRPFGVPR.Y<br>R.DMIEGDFFFQSDLADAVASAR.D<br>R.RPAMYDR.I<br>R.LVELAVEKAGCAK.F<br>R.LDKEGEIIPTMPPYWHFGQR.Y<br>R.HTAPVLLHCNSTYPAPFK.D<br>R.GITQGEHMR.E<br>R.EVEEAMGYGAR.G<br>K.HFTVDR.G<br>K.DDAGSFWQALDR.L<br>R.RQDIAEADR.H<br>K.GRYEAILLQPTSPLR.L<br>R.SFGAQVFLRPAELATDTAPTEPVMHLTLER.M<br>R.YEAILLQPTSPLR.L                                                                                                                                                                                                                                                                                                                                                                                                                                                                                                                                                                                                                                                                                                                                                                                                                                                                                                                                                                                         |
| YP_616627 | Sala_1581 | acyleuraminatase cytidilyltransferase   | 41.41%            | 5                       | R.HFDTLPLGLLAAGVPTLIEKPVVIR.A<br>R.AADGLPVEALDYSR.T<br>R.SSLHITSEDLHLR.A<br>R.LADAHEVYDK.G<br>R.GIEVGEDATAVLDFR.A<br>K.TPGNEEQR.L<br>R.AGQQIADEDIQR.S<br>R.NIAPLIVFAEEDIVSALR.K<br>R.YHNLFLSAEDIVR.F<br>R.VSLLPDEFSAHVR.A<br>R.SPGQGLQPYFR.A<br>K.LSGGVVYSGHER.G<br>K.DGASEDELNDFSDR.V<br>R.NIAPLIVFAEEDIVSALR.K.I<br>K.SARPPHINAGGFSADGPTAER.R<br>R.GYTFPAARAVAMGAK.V<br>K.DINLAYR.R<br>R.NEGSDSDASADLGAQYTLDLLSR.F<br>K.LEAVLTDGVR.R<br>K.DGASEDELNDFSDRVTVPVVDGQR.H<br>R.VTFVPIVDGQR.H<br>R.EVEEAMGYGAR.G<br>K.TSFQELLR.Q<br>R.LEAVMPYK.L<br>K.LASADLTHPLLSAMAR.T<br>R.ETAPDASFIPEIWQGHK.D<br>K.LEAVLTDGVR.R.W<br>R.GITQGEHMR.E<br>R.ETAPDASFIPEIWQGHKDDGAGFWQALDR.L<br>R.YHDLQK.M<br>R.VIGPESPIAIEIGNHNGSIELAK.R<br>R.FDRPFGVPR.Y<br>R.DMIEGDFFFQSDLADAVASAR.D<br>R.RPAMYDR.I<br>R.LVELAVEKAGCAK.F<br>R.LDKEGEIIPTMPPYWHFGQR.Y<br>R.HTAPVLLHCNSTYPAPFK.D<br>R.GITQGEHMR.E<br>R.EVEEAMGYGAR.G<br>K.HFTVDR.G<br>K.DDAGSFWQALDR.L<br>R.RQDIAEADR.H<br>K.GRYEAILLQPTSPLR.L<br>R.SFGAQVFLRPAELATDTAPTEPVMHLTLER.M<br>R.YEAILLQPTSPLR.L                                                                                                                                                                                                                                                                                                                                                                                                                                                                                                                                                                                                                                                                                                                                                                                                                                                                                                                                                                                         |
| YP_616628 | Sala_1582 | hypothetical protein                    | 53.23%            | 17                      | R.HFDTLPLGLLAAGVPTLIEKPVVIR.A<br>R.AADGLPVEALDYSR.T<br>R.SSLHITSEDLHLR.A<br>R.LADAHEVYDK.G<br>R.GIEVGEDATAVLDFR.A<br>K.TPGNEEQR.L<br>R.AGQQIADEDIQR.S<br>R.NIAPLIVFAEEDIVSALR.K<br>R.YHNLFLSAEDIVR.F<br>R.VSLLPDEFSAHVR.A<br>R.SPGQGLQPYFR.A<br>K.LSGGVVYSGHER.G<br>K.DGASEDELNDFSDR.V<br>R.NIAPLIVFAEEDIVSALR.K.I<br>K.SARPPHINAGGFSADGPTAER.R<br>R.GYTFPAARAVAMGAK.V<br>K.DINLAYR.R<br>R.NEGSDSDASADLGAQYTLDLLSR.F<br>K.LEAVLTDGVR.R<br>K.DGASEDELNDFSDRVTVPVVDGQR.H<br>R.VTFVPIVDGQR.H<br>R.EVEEAMGYGAR.G<br>K.TSFQELLR.Q<br>R.LEAVMPYK.L<br>K.LASADLTHPLLSAMAR.T<br>R.ETAPDASFIPEIWQGHK.D<br>K.LEAVLTDGVR.R.W<br>R.GITQGEHMR.E<br>R.ETAPDASFIPEIWQGHKDDGAGFWQALDR.L<br>R.YHDLQK.M<br>R.VIGPESPIAIEIGNHNGSIELAK.R<br>R.FDRPFGVPR.Y<br>R.DMIEGDFFFQSDLADAVASAR.D<br>R.RPAMYDR.I<br>R.LVELAVEKAGCAK.F<br>R.LDKEGEIIPTMPPYWHFGQR.Y<br>R.HTAPVLLHCNSTYPAPFK.D<br>R.GITQGEHMR.E<br>R.EVEEAMGYGAR.G<br>K.HFTVDR.G<br>K.DDAGSFWQALDR.L<br>R.RQDIAEADR.H<br>K.GRYEAILLQPTSPLR.L<br>R.SFGAQVFLRPAELATDTAPTEPVMHLTLER.M<br>R.YEAILLQPTSPLR.L                                                                                                                                                                                                                                                                                                                                                                                                                                                                                                                                                                                                                                                                                                                                                                                                                                                                                                                                                                                         |
| YP_616629 | Sala_1583 | Protein-tyrosine kinase                 | 66.49%            | 36                      | R.HFDTLPLGLLAAGVPTLIEKPVVIR.A<br>R.AADGLPVEALDYSR.T<br>R.SSLHITSEDLHLR.A<br>R.LADAHEVYDK.G<br>R.GIEVGEDATAVLDFR.A<br>K.TPGNEEQR.L<br>R.AGQQIADEDIQR.S<br>R.NIAPLIVFAEEDIVSALR.K<br>R.YHNLFLSAEDIVR.F<br>R.VSLLPDEFSAHVR.A<br>R.SPGQGLQPYFR.A<br>K.LSGGVVYSGHER.G<br>K.DGASEDELNDFSDR.V<br>R.NIAPLIVFAEEDIVSALR.K.I<br>K.SARPPHINAGGFSADGPTAER.R<br>R.GYTFPAARAVAMGAK.V<br>K.DINLAYR.R<br>R.NEGSDSDASADLGAQYTLDLLSR.F<br>K.LEAVLTDGVR.R<br>K.DGASEDELNDFSDRVTVPVVDGQR.H<br>R.VTFVPIVDGQR.H<br>R.EVEEAMGYGAR.G<br>K.TSFQELLR.Q<br>R.LEAVMPYK.L<br>K.LASADLTHPLLSAMAR.T<br>R.ETAPDASFIPEIWQGHK.D<br>K.LEAVLTDGVR.R.W<br>R.GITQGEHMR.E<br>R.ETAPDASFIPEIWQGHKDDGAGFWQALDR.L<br>R.YHDLQK.M<br>R.VIGPESPIAIEIGNHNGSIELAK.R<br>R.FDRPFGVPR.Y<br>R.DMIEGDFFFQSDLADAVASAR.D<br>R.RPAMYDR.I<br>R.LVELAVEKAGCAK.F<br>R.LDKEGEIIPTMPPYWHFGQR.Y<br>R.HTAPVLLHCNSTYPAPFK.D<br>R.GITQGEHMR.E<br>R.EVEEAMGYGAR.G<br>K.HFTVDR.G<br>K.DDAGSFWQALDR.L<br>R.RQDIAEADR.H<br>K.GRYEAILLQPTSPLR.L<br>R.SFGAQVFLRPAELATDTAPTEPVMHLTLER.M<br>R.YEAILLQPTSPLR.L                                                                                                                                                                                                                                                                                                                                                                                                                                                                                                                                                                                                                                                                                                                                                                                                                                                                                                                                                                                         |

| Accession | Locus tag | Description                                   | Sequence coverage | No. peptides identified | List of peptides identified                                                                                                                                                                                                                                                                                                                                                                                                                                                                                                                                                                                                                                                                                                                                                                                                                                                                                                                                                                                                                                                                                                                                                                                                                                                                                                                                                                                                                                                                                                                                                                                                                                                                                                                                                                                                                                                                                                                                                                                                                                                                                                                                                                     |
|-----------|-----------|-----------------------------------------------|-------------------|-------------------------|-------------------------------------------------------------------------------------------------------------------------------------------------------------------------------------------------------------------------------------------------------------------------------------------------------------------------------------------------------------------------------------------------------------------------------------------------------------------------------------------------------------------------------------------------------------------------------------------------------------------------------------------------------------------------------------------------------------------------------------------------------------------------------------------------------------------------------------------------------------------------------------------------------------------------------------------------------------------------------------------------------------------------------------------------------------------------------------------------------------------------------------------------------------------------------------------------------------------------------------------------------------------------------------------------------------------------------------------------------------------------------------------------------------------------------------------------------------------------------------------------------------------------------------------------------------------------------------------------------------------------------------------------------------------------------------------------------------------------------------------------------------------------------------------------------------------------------------------------------------------------------------------------------------------------------------------------------------------------------------------------------------------------------------------------------------------------------------------------------------------------------------------------------------------------------------------------|
| YP_616630 | Sala_1584 | O-antigen polymerase                          | 20.95%            | 6                       | R.TRAIGAVR.T<br>R.LRLETNENFWAAHGIDMSDFSDADAR.S<br>R.KPSLHK.H<br>R.EVMPNLDIFRAGSPVPSAAELSSDR.M<br>K.KVILIDVDMR.K<br>K.ISPLQIAAGLGR.G<br>R.LFASASGSEASLR.F<br>R.AGVLMLGLVGLASVPFLK.I<br>R.ITNDGSAVGLFANR.N<br>R.SVGDSSGGER.R<br>R.NEENSALQWGGGLAFAALLPSSLVAQSR.A<br>R.SSANPGSSEIVER.G<br>R.NVLYGAGTTGQR.L<br>R.LAASLSSEGLR.V<br>R.FGVILGSSGSVPTFR.Q<br>R.LVFTLHDGSPATVPAPHSR.<br>R.LFADEAPDTIYHAAAYK.H<br>K.LSNVADAAVER.L<br>K.LFEELLGEEESQPTAHR.I<br>R.LGEWSSDDWPVLR.F<br>R.FFTDASTQMITFAAR.M<br>R.LQNELFALDLRPGSIRPLL.A<br>R.IFSSDIESVLMQLGVTIDVLAQTQVGD.R<br>K.HVPLLEENLDGVANNIR.G<br>R.LFGWAPEIFDR.A<br>K.LLADIGLAQLDR.E<br>R.TVSLRPPALIGPGVTAWFAALVK.A<br>R.DVLQVVPFLTTPVVALQNN.<br>R.FSPFAGVIQAAK.T<br>R.GAYADPDIHANDVVVGDSSASR.R<br>R.AIATAEGTAEFAR.L<br>K.ETGSQVTVVEGQVR.K<br>K.TPAEVEQYLR.S<br>R.LDEWVFR.T<br>R.RGAYADPDIHANDVVVGDSSASR.R<br>K.YAALFNK.A<br>R.KPGLYPVVGK.M<br>R.LFRDVLQVPLTTPVVALQNN.<br>R.DPQVTNVLK.E<br>R.AIATAEGTAEFARLDEVVFR.T<br>R.VIPADSLPEFGADTLSDEPVLGPFDR.L<br>R.GAYADPDIHANDVVVGDSSASRR.L<br>R.EVQTDASGR.F<br>K.REVQTDASGR.F<br>K.LMQAHRDPQVTNVLK.E<br>R.YGVYVFIAGVR.D<br>R.LTFEELADVFSDAVPR.S<br>R.LTAIGLVGTD.R.W<br>R.IGIDTGAYR.T<br>R.WIRDEFSSK.R<br>R.ALSLPAHFR.V                                                                                                                                                                                                                                                                                                                                                                                                                                                                                                                                                                                                                                                                                                                                                                                                                                                                                                                                                                                          |
| YP_616631 | Sala_1585 | polysaccharide biosynthesis protein CapD      | 33.69%            | 13                      | R.ETTERPEGIEAGTAR.L<br>K.AJEAJAGIARPDVAVIFVHPNPHVR.S<br>R.SAMEPLGALPNVALIDPLDYPHFVR.L<br>R.LLALSTLVLTDSGGVQEEAPSLGKPVLMR.E<br>R.LVTGLGEAFDAEKPR.I<br>R.EMLDQVLEIAR.I<br>R.IVSEIFSLDDDEGAYNAMAR.A<br>R.ITPDIDLDMVTPQSLDALLAR.L<br>R.IHVTGNTVIDALLATQAR.I<br>R.IEEEPSLAAGLPLAR.R<br>K.VTGAVADLHFAPTEAALAAAR.A<br>K.VHIEEVDLDGLVQGVVSR.G<br>R.AIAPQLVPGNLVILESTSPVGTTEK.V<br>R.GLWVQPSVGNTRFR.A<br>R.GDKIVYDTR.G<br>R.ESPVAEVAALAR.R<br>K.HVVTVNSGK.V<br>R.LETIIKEPWGR.T<br>R.ADAIALEPGAR.A<br>R.HAALDGTIVNMVDWR.A<br>R.CKEECWLVLAADPGAEGLVGLNAPPTSEALR.H<br>R.ELHDLGLAVALATKPVADPR.D<br>R.IGEIIALDAADNYLR.A<br>R.NTAPAIALAALAAAR.S<br>R.LHDGSGVIGFAGATADAFLLFER.L<br>R.RLHDGSGVIGFAGATADAFLLFER.L<br>R.AJADYKQPEVLAQK<br>R.NLEAMMIVADR.E<br>R.LHDGSGVIGFAGATADAFLLFERLEAK.L<br>R.VALADAEANGVFLDEIDKIAVDVVR.G<br>R.VELGALTEEDFVR.I<br>R.DLLPLIEGTTVATK.Y<br>K.AGLPEQYVALLGTEGVTLNFAPDAIAR.V<br>R.QQLPAELRDEVTPK.N<br>R.QLADVGDVTDLSK.Y<br>K.FTEVGYVGR.D<br>K.LAAEVNEKVENIGAR.R<br>K.AIVAAALDTHIIGQDAAR.K<br>R.RLQTHMR.L<br>R.DLVEEAVR.L<br>R.AAAEEAAMER.L<br>K.TDHILFIASGAFHVAKPSDLLPELQGR.L<br>K.AIVAAALDTHIIGQDAAR.A<br>R.VALADAEANGVFLDEIDK.I<br>R.LPIRVELGALTEEDFVR.I<br>K.LAAEVNEK.V<br>R.AGSTGAPGAATPGRQGG.<br>R.TLDPGETYQVPPAYIEQFTLR.T<br>K.AGGASAGVAENAPVLTGLSEVWIGFDDAEQK.T<br>R.FLSVPEDEALIAAQNR.D<br>R.DADASEPESAASTVPAAK.A<br>R.ELEEDYGSRLYEAEPDTPAR.L<br>R.EAAGLSLADVATR.T<br>R.DVPGVPADTLVK.N<br>R.AVNLPEAIEGAAIR.R<br>K.SDFSLEPGR.T<br>K.AGGASAGVAENAPVLTGLSEVWIGFDDAEQKTNQR.T<br>R.HAAIEKSDSELPGR.T<br>R.MTDEDVAPQGEALATR.T<br>K.NISLKPADLIAR.A<br>R.LADPAASEDTTPASLAPTVK.A<br>R.ELDEVYGDKAPQDVR.T<br>R.VDALETQLALITGQTEQNAFHLR.E<br>K.APAATAAVATPTR.P<br>R.TVFPNGNPTFFEGEAPDNTPGER.A<br>R.AYLDEGKPSLAAVAFYNNYK.D<br>K.APAATAAVATPTRPASK.P<br>K.AVEVPATGNETKDAYDYGYR.L<br>K.AVEVPATGNETK.D<br>K.WPQSSYASFAQNLGR.A<br>K.PGAKPAGPDAAR.L<br>R.APHSLMYMGVALDR.L<br>R.ANAPVIDLTR.V<br>K.DAYDYGYR.L<br>R.YRDNQDEVFLGHVSRS.A<br>R.LVEEGEAVAR.K<br>R.LIASDEFEAKDK.V<br>R.LAAALLEYETLSGEEAKR.V<br>K.GALLVSPGTGK.T<br>R.LAAALLEYETLSGEEAKR.R<br>R.RLVEEGEAVAR.K<br>R.KVLTDHIDELHR.L<br>R.GTTPVSGHVGGLPQIK.R<br>R.IAEQLIYGEDELNTGASNDIQQATEMAR.A<br>R.AQNMSEETAK.L<br>K.EVILSEDRVTGTLNSGDR.F |
| YP_616632 | Sala_1587 | NAD-dependent epimerase/dehydratase           | 15.16%            | 3                       | R.LVFTLHDGSPATVPAPHSR.<br>R.LFADEAPDTIYHAAAYK.H<br>K.LSNVADAAVER.L<br>K.LFEELLGEEESQPTAHR.I<br>R.LGEWSSDDWPVLR.F<br>R.FFTDASTQMITFAAR.M<br>R.LQNELFALDLRPGSIRPLL.A<br>R.IFSSDIESVLMQLGVTIDVLAQTQVGD.R<br>K.HVPLLEENLDGVANNIR.G<br>R.LFGWAPEIFDR.A<br>K.LLADIGLAQLDR.E<br>R.TVSLRPPALIGPGVTAWFAALVK.A<br>R.DVLQVVPFLTTPVVALQNN.<br>R.FSPFAGVIQAAK.T<br>R.GAYADPDIHANDVVVGDSSASR.R<br>R.AIATAEGTAEFAR.L<br>K.ETGSQVTVVEGQVR.K<br>K.TPAEVEQYLR.S<br>R.LDEWVFR.T<br>R.RGAYADPDIHANDVVVGDSSASR.R<br>K.YAALFNK.A<br>R.KPGLYPVVGK.M<br>R.LFRDVLQVPLTTPVVALQNN.<br>R.DPQVTNVLK.E<br>R.AIATAEGTAEFARLDEVVFR.T<br>R.VIPADSLPEFGADTLSDEPVLGPFDR.L<br>R.GAYADPDIHANDVVVGDSSASRR.L<br>R.EVQTDASGR.F<br>K.REVQTDASGR.F<br>K.LMQAHRDPQVTNVLK.E<br>R.YGVYVFIAGVR.D<br>R.LTFEELADVFSDAVPR.S<br>R.LTAIGLVGTD.R.W<br>R.IGIDTGAYR.T<br>R.WIRDEFSSK.R<br>R.ALSLPAHFR.V                                                                                                                                                                                                                                                                                                                                                                                                                                                                                                                                                                                                                                                                                                                                                                                                                                                                                                                                                                                                                                                                                                                                                                                                                                                                                                                                               |
| YP_616633 | Sala_1587 | NAD-dependent epimerase/dehydratase           | 15.16%            | 3                       | R.LVFTLHDGSPATVPAPHSR.<br>R.LFADEAPDTIYHAAAYK.H<br>K.LSNVADAAVER.L<br>K.LFEELLGEEESQPTAHR.I<br>R.LGEWSSDDWPVLR.F<br>R.FFTDASTQMITFAAR.M<br>R.LQNELFALDLRPGSIRPLL.A<br>R.IFSSDIESVLMQLGVTIDVLAQTQVGD.R<br>K.HVPLLEENLDGVANNIR.G<br>R.LFGWAPEIFDR.A<br>K.LLADIGLAQLDR.E<br>R.TVSLRPPALIGPGVTAWFAALVK.A<br>R.DVLQVVPFLTTPVVALQNN.<br>R.FSPFAGVIQAAK.T<br>R.GAYADPDIHANDVVVGDSSASR.R<br>R.AIATAEGTAEFAR.L<br>K.ETGSQVTVVEGQVR.K<br>K.TPAEVEQYLR.S<br>R.LDEWVFR.T<br>R.RGAYADPDIHANDVVVGDSSASR.R<br>K.YAALFNK.A<br>R.KPGLYPVVGK.M<br>R.LFRDVLQVPLTTPVVALQNN.<br>R.DPQVTNVLK.E<br>R.AIATAEGTAEFARLDEVVFR.T<br>R.VIPADSLPEFGADTLSDEPVLGPFDR.L<br>R.GAYADPDIHANDVVVGDSSASRR.L<br>R.EVQTDASGR.F<br>K.REVQTDASGR.F<br>K.LMQAHRDPQVTNVLK.E<br>R.YGVYVFIAGVR.D<br>R.LTFEELADVFSDAVPR.S<br>R.LTAIGLVGTD.R.W<br>R.IGIDTGAYR.T<br>R.WIRDEFSSK.R<br>R.ALSLPAHFR.V                                                                                                                                                                                                                                                                                                                                                                                                                                                                                                                                                                                                                                                                                                                                                                                                                                                                                                                                                                                                                                                                                                                                                                                                                                                                                                                                               |
| YP_616634 | Sala_1588 | polysaccharide export protein                 | 78.21%            | 18                      | R.ETTERPEGIEAGTAR.L<br>K.AJEAJAGIARPDVAVIFVHPNPHVR.S<br>R.SAMEPLGALPNVALIDPLDYPHFVR.L<br>R.LLALSTLVLTDSGGVQEEAPSLGKPVLMR.E<br>R.LVTGLGEAFDAEKPR.I<br>R.EMLDQVLEIAR.I<br>R.IVSEIFSLDDDEGAYNAMAR.A<br>R.ITPDIDLDMVTPQSLDALLAR.L<br>R.IHVTGNTVIDALLATQAR.I<br>R.IEEEPSLAAGLPLAR.R<br>K.VTGAVADLHFAPTEAALAAAR.A<br>K.VHIEEVDLDGLVQGVVSR.G<br>R.AIAPQLVPGNLVILESTSPVGTTEK.V<br>R.GLWVQPSVGNTRFR.A<br>R.GDKIVYDTR.G<br>R.ESPVAEVAALAR.R<br>K.HVVTVNSGK.V<br>R.LETIIKEPWGR.T<br>R.ADAIALEPGAR.A<br>R.HAALDGTIVNMVDWR.A<br>R.CKEECWLVLAADPGAEGLVGLNAPPTSEALR.H<br>R.ELHDLGLAVALATKPVADPR.D<br>R.IGEIIALDAADNYLR.A<br>R.NTAPAIALAALAAAR.S<br>R.LHDGSGVIGFAGATADAFLLFER.L<br>R.RLHDGSGVIGFAGATADAFLLFER.L<br>R.AJADYKQPEVLAQK<br>R.NLEAMMIVADR.E<br>R.LHDGSGVIGFAGATADAFLLFERLEAK.L<br>R.VALADAEANGVFLDEIDKIAVDVVR.G<br>R.VELGALTEEDFVR.I<br>R.DLLPLIEGTTVATK.Y<br>K.AGLPEQYVALLGTEGVTLNFAPDAIAR.V<br>R.QQLPAELRDEVTPK.N<br>R.QLADVGDVTDLSK.Y<br>K.FTEVGYVGR.D<br>K.LAAEVNEKVENIGAR.R<br>K.AIVAAALDTHIIGQDAAR.K<br>R.RLQTHMR.L<br>R.DLVEEAVR.L<br>R.AAAEEAAMER.L<br>K.TDHILFIASGAFHVAKPSDLLPELQGR.L<br>K.AIVAAALDTHIIGQDAAR.A<br>R.VALADAEANGVFLDEIDK.I<br>R.LPIRVELGALTEEDFVR.I<br>K.LAAEVNEK.V<br>R.AGSTGAPGAATPGRQGG.<br>R.TLDPGETYQVPPAYIEQFTLR.T<br>K.AGGASAGVAENAPVLTGLSEVWIGFDDAEQK.T<br>R.FLSVPEDEALIAAQNR.D<br>R.DADASEPESAASTVPAAK.A<br>R.ELEEDYGSRLYEAEPDTPAR.L<br>R.EAAGLSLADVATR.T<br>R.DVPGVPADTLVK.N<br>R.AVNLPEAIEGAAIR.R<br>K.SDFSLEPGR.T<br>K.AGGASAGVAENAPVLTGLSEVWIGFDDAEQKTNQR.T<br>R.HAAIEKSDSELPGR.T<br>R.MTDEDVAPQGEALATR.T<br>K.NISLKPADLIAR.A<br>R.LADPAASEDTTPASLAPTVK.A<br>R.ELDEVYGDKAPQDVR.T<br>R.VDALETQLALITGQTEQNAFHLR.E<br>K.APAATAAVATPTR.P<br>R.TVFPNGNPTFFEGEAPDNTPGER.A<br>R.AYLDEGKPSLAAVAFYNNYK.D<br>K.APAATAAVATPTRPASK.P<br>K.AVEVPATGNETKDAYDYGYR.L<br>K.AVEVPATGNETK.D<br>K.WPQSSYASFAQNLGR.A<br>K.PGAKPAGPDAAR.L<br>R.APHSLMYMGVALDR.L<br>R.ANAPVIDLTR.V<br>K.DAYDYGYR.L<br>R.YRDNQDEVFLGHVSRS.A<br>R.LVEEGEAVAR.K<br>R.LIASDEFEAKDK.V<br>R.LAAALLEYETLSGEEAKR.V<br>K.GALLVSPGTGK.T<br>R.LAAALLEYETLSGEEAKR.R<br>R.RLVEEGEAVAR.K<br>R.KVLTDHIDELHR.L<br>R.GTTPVSGHVGGLPQIK.R<br>R.IAEQLIYGEDELNTGASNDIQQATEMAR.A<br>R.AQNMSEETAK.L<br>K.EVILSEDRVTGTLNSGDR.F |
| YP_616635 | Sala_1589 | metallophosphoesterase                        | 26.67%            | 6                       | R.ETTERPEGIEAGTAR.L<br>K.AJEAJAGIARPDVAVIFVHPNPHVR.S<br>R.SAMEPLGALPNVALIDPLDYPHFVR.L<br>R.LLALSTLVLTDSGGVQEEAPSLGKPVLMR.E<br>R.LVTGLGEAFDAEKPR.I<br>R.EMLDQVLEIAR.I<br>R.IVSEIFSLDDDEGAYNAMAR.A<br>R.ITPDIDLDMVTPQSLDALLAR.L<br>R.IHVTGNTVIDALLATQAR.I<br>R.IEEEPSLAAGLPLAR.R<br>K.VTGAVADLHFAPTEAALAAAR.A<br>K.VHIEEVDLDGLVQGVVSR.G<br>R.AIAPQLVPGNLVILESTSPVGTTEK.V<br>R.GLWVQPSVGNTRFR.A<br>R.GDKIVYDTR.G<br>R.ESPVAEVAALAR.R<br>K.HVVTVNSGK.V<br>R.LETIIKEPWGR.T<br>R.ADAIALEPGAR.A<br>R.HAALDGTIVNMVDWR.A<br>R.CKEECWLVLAADPGAEGLVGLNAPPTSEALR.H<br>R.ELHDLGLAVALATKPVADPR.D<br>R.IGEIIALDAADNYLR.A<br>R.NTAPAIALAALAAAR.S<br>R.LHDGSGVIGFAGATADAFLLFER.L<br>R.RLHDGSGVIGFAGATADAFLLFER.L<br>R.AJADYKQPEVLAQK<br>R.NLEAMMIVADR.E<br>R.LHDGSGVIGFAGATADAFLLFERLEAK.L<br>R.VALADAEANGVFLDEIDKIAVDVVR.G<br>R.VELGALTEEDFVR.I<br>R.DLLPLIEGTTVATK.Y<br>K.AGLPEQYVALLGTEGVTLNFAPDAIAR.V<br>R.QQLPAELRDEVTPK.N<br>R.QLADVGDVTDLSK.Y<br>K.FTEVGYVGR.D<br>K.LAAEVNEKVENIGAR.R<br>K.AIVAAALDTHIIGQDAAR.K<br>R.RLQTHMR.L<br>R.DLVEEAVR.L<br>R.AAAEEAAMER.L<br>K.TDHILFIASGAFHVAKPSDLLPELQGR.L<br>K.AIVAAALDTHIIGQDAAR.A<br>R.VALADAEANGVFLDEIDK.I<br>R.LPIRVELGALTEEDFVR.I<br>K.LAAEVNEK.V<br>R.AGSTGAPGAATPGRQGG.<br>R.TLDPGETYQVPPAYIEQFTLR.T<br>K.AGGASAGVAENAPVLTGLSEVWIGFDDAEQK.T<br>R.FLSVPEDEALIAAQNR.D<br>R.DADASEPESAASTVPAAK.A<br>R.ELEEDYGSRLYEAEPDTPAR.L<br>R.EAAGLSLADVATR.T<br>R.DVPGVPADTLVK.N<br>R.AVNLPEAIEGAAIR.R<br>K.SDFSLEPGR.T<br>K.AGGASAGVAENAPVLTGLSEVWIGFDDAEQKTNQR.T<br>R.HAAIEKSDSELPGR.T<br>R.MTDEDVAPQGEALATR.T<br>K.NISLKPADLIAR.A<br>R.LADPAASEDTTPASLAPTVK.A<br>R.ELDEVYGDKAPQDVR.T<br>R.VDALETQLALITGQTEQNAFHLR.E<br>K.APAATAAVATPTR.P<br>R.TVFPNGNPTFFEGEAPDNTPGER.A<br>R.AYLDEGKPSLAAVAFYNNYK.D<br>K.APAATAAVATPTRPASK.P<br>K.AVEVPATGNETKDAYDYGYR.L<br>K.AVEVPATGNETK.D<br>K.WPQSSYASFAQNLGR.A<br>K.PGAKPAGPDAAR.L<br>R.APHSLMYMGVALDR.L<br>R.ANAPVIDLTR.V<br>K.DAYDYGYR.L<br>R.YRDNQDEVFLGHVSRS.A<br>R.LVEEGEAVAR.K<br>R.LIASDEFEAKDK.V<br>R.LAAALLEYETLSGEEAKR.V<br>K.GALLVSPGTGK.T<br>R.LAAALLEYETLSGEEAKR.R<br>R.RLVEEGEAVAR.K<br>R.KVLTDHIDELHR.L<br>R.GTTPVSGHVGGLPQIK.R<br>R.IAEQLIYGEDELNTGASNDIQQATEMAR.A<br>R.AQNMSEETAK.L<br>K.EVILSEDRVTGTLNSGDR.F |
| YP_616636 | Sala_1590 | UDP-N-acetylglucosamine 2-epimerase           | 59.63%            | 11                      | R.ETTERPEGIEAGTAR.L<br>K.AJEAJAGIARPDVAVIFVHPNPHVR.S<br>R.SAMEPLGALPNVALIDPLDYPHFVR.L<br>R.LLALSTLVLTDSGGVQEEAPSLGKPVLMR.E<br>R.LVTGLGEAFDAEKPR.I<br>R.EMLDQVLEIAR.I<br>R.IVSEIFSLDDDEGAYNAMAR.A<br>R.ITPDIDLDMVTPQSLDALLAR.L<br>R.IHVTGNTVIDALLATQAR.I<br>R.IEEEPSLAAGLPLAR.R<br>K.VTGAVADLHFAPTEAALAAAR.A<br>K.VHIEEVDLDGLVQGVVSR.G<br>R.AIAPQLVPGNLVILESTSPVGTTEK.V<br>R.GLWVQPSVGNTRFR.A<br>R.GDKIVYDTR.G<br>R.ESPVAEVAALAR.R<br>K.HVVTVNSGK.V<br>R.LETIIKEPWGR.T<br>R.ADAIALEPGAR.A<br>R.HAALDGTIVNMVDWR.A<br>R.CKEECWLVLAADPGAEGLVGLNAPPTSEALR.H<br>R.ELHDLGLAVALATKPVADPR.D<br>R.IGEIIALDAADNYLR.A<br>R.NTAPAIALAALAAAR.S<br>R.LHDGSGVIGFAGATADAFLLFER.L<br>R.RLHDGSGVIGFAGATADAFLLFER.L<br>R.AJADYKQPEVLAQK<br>R.NLEAMMIVADR.E<br>R.LHDGSGVIGFAGATADAFLLFERLEAK.L<br>R.VALADAEANGVFLDEIDKIAVDVVR.G<br>R.VELGALTEEDFVR.I<br>R.DLLPLIEGTTVATK.Y<br>K.AGLPEQYVALLGTEGVTLNFAPDAIAR.V<br>R.QQLPAELRDEVTPK.N<br>R.QLADVGDVTDLSK.Y<br>K.FTEVGYVGR.D<br>K.LAAEVNEKVENIGAR.R<br>K.AIVAAALDTHIIGQDAAR.K<br>R.RLQTHMR.L<br>R.DLVEEAVR.L<br>R.AAAEEAAMER.L<br>K.TDHILFIASGAFHVAKPSDLLPELQGR.L<br>K.AIVAAALDTHIIGQDAAR.A<br>R.VALADAEANGVFLDEIDK.I<br>R.LPIRVELGALTEEDFVR.I<br>K.LAAEVNEK.V<br>R.AGSTGAPGAATPGRQGG.<br>R.TLDPGETYQVPPAYIEQFTLR.T<br>K.AGGASAGVAENAPVLTGLSEVWIGFDDAEQK.T<br>R.FLSVPEDEALIAAQNR.D<br>R.DADASEPESAASTVPAAK.A<br>R.ELEEDYGSRLYEAEPDTPAR.L<br>R.EAAGLSLADVATR.T<br>R.DVPGVPADTLVK.N<br>R.AVNLPEAIEGAAIR.R<br>K.SDFSLEPGR.T<br>K.AGGASAGVAENAPVLTGLSEVWIGFDDAEQKTNQR.T<br>R.HAAIEKSDSELPGR.T<br>R.MTDEDVAPQGEALATR.T<br>K.NISLKPADLIAR.A<br>R.LADPAASEDTTPASLAPTVK.A<br>R.ELDEVYGDKAPQDVR.T<br>R.VDALETQLALITGQTEQNAFHLR.E<br>K.APAATAAVATPTR.P<br>R.TVFPNGNPTFFEGEAPDNTPGER.A<br>R.AYLDEGKPSLAAVAFYNNYK.D<br>K.APAATAAVATPTRPASK.P<br>K.AVEVPATGNETKDAYDYGYR.L<br>K.AVEVPATGNETK.D<br>K.WPQSSYASFAQNLGR.A<br>K.PGAKPAGPDAAR.L<br>R.APHSLMYMGVALDR.L<br>R.ANAPVIDLTR.V<br>K.DAYDYGYR.L<br>R.YRDNQDEVFLGHVSRS.A<br>R.LVEEGEAVAR.K<br>R.LIASDEFEAKDK.V<br>R.LAAALLEYETLSGEEAKR.V<br>K.GALLVSPGTGK.T<br>R.LAAALLEYETLSGEEAKR.R<br>R.RLVEEGEAVAR.K<br>R.KVLTDHIDELHR.L<br>R.GTTPVSGHVGGLPQIK.R<br>R.IAEQLIYGEDELNTGASNDIQQATEMAR.A<br>R.AQNMSEETAK.L<br>K.EVILSEDRVTGTLNSGDR.F |
| YP_616637 | Sala_1591 | UDP-glucose/GDP-mannose dehydrogenase         | 21.35%            | 6                       | R.ETTERPEGIEAGTAR.L<br>K.AJEAJAGIARPDVAVIFVHPNPHVR.S<br>R.SAMEPLGALPNVALIDPLDYPHFVR.L<br>R.LLALSTLVLTDSGGVQEEAPSLGKPVLMR.E<br>R.LVTGLGEAFDAEKPR.I<br>R.EMLDQVLEIAR.I<br>R.IVSEIFSLDDDEGAYNAMAR.A<br>R.ITPDIDLDMVTPQSLDALLAR.L<br>R.IHVTGNTVIDALLATQAR.I<br>R.IEEEPSLAAGLPLAR.R<br>K.VTGAVADLHFAPTEAALAAAR.A<br>K.VHIEEVDLDGLVQGVVSR.G<br>R.AIAPQLVPGNLVILESTSPVGTTEK.V<br>R.GLWVQPSVGNTRFR.A<br>R.GDKIVYDTR.G<br>R.ESPVAEVAALAR.R<br>K.HVVTVNSGK.V<br>R.LETIIKEPWGR.T<br>R.ADAIALEPGAR.A<br>R.HAALDGTIVNMVDWR.A<br>R.CKEECWLVLAADPGAEGLVGLNAPPTSEALR.H<br>R.ELHDLGLAVALATKPVADPR.D<br>R.IGEIIALDAADNYLR.A<br>R.NTAPAIALAALAAAR.S<br>R.LHDGSGVIGFAGATADAFLLFER.L<br>R.RLHDGSGVIGFAGATADAFLLFER.L<br>R.AJADYKQPEVLAQK<br>R.NLEAMMIVADR.E<br>R.LHDGSGVIGFAGATADAFLLFERLEAK.L<br>R.VALADAEANGVFLDEIDKIAVDVVR.G<br>R.VELGALTEEDFVR.I<br>R.DLLPLIEGTTVATK.Y<br>K.AGLPEQYVALLGTEGVTLNFAPDAIAR.V<br>R.QQLPAELRDEVTPK.N<br>R.QLADVGDVTDLSK.Y<br>K.FTEVGYVGR.D<br>K.LAAEVNEKVENIGAR.R<br>K.AIVAAALDTHIIGQDAAR.K<br>R.RLQTHMR.L<br>R.DLVEEAVR.L<br>R.AAAEEAAMER.L<br>K.TDHILFIASGAFHVAKPSDLLPELQGR.L<br>K.AIVAAALDTHIIGQDAAR.A<br>R.VALADAEANGVFLDEIDK.I<br>R.LPIRVELGALTEEDFVR.I<br>K.LAAEVNEK.V<br>R.AGSTGAPGAATPGRQGG.<br>R.TLDPGETYQVPPAYIEQFTLR.T<br>K.AGGASAGVAENAPVLTGLSEVWIGFDDAEQK.T<br>R.FLSVPEDEALIAAQNR.D<br>R.DADASEPESAASTVPAAK.A<br>R.ELEEDYGSRLYEAEPDTPAR.L<br>R.EAAGLSLADVATR.T<br>R.DVPGVPADTLVK.N<br>R.AVNLPEAIEGAAIR.R<br>K.SDFSLEPGR.T<br>K.AGGASAGVAENAPVLTGLSEVWIGFDDAEQKTNQR.T<br>R.HAAIEKSDSELPGR.T<br>R.MTDEDVAPQGEALATR.T<br>K.NISLKPADLIAR.A<br>R.LADPAASEDTTPASLAPTVK.A<br>R.ELDEVYGDKAPQDVR.T<br>R.VDALETQLALITGQTEQNAFHLR.E<br>K.APAATAAVATPTR.P<br>R.TVFPNGNPTFFEGEAPDNTPGER.A<br>R.AYLDEGKPSLAAVAFYNNYK.D<br>K.APAATAAVATPTRPASK.P<br>K.AVEVPATGNETKDAYDYGYR.L<br>K.AVEVPATGNETK.D<br>K.WPQSSYASFAQNLGR.A<br>K.PGAKPAGPDAAR.L<br>R.APHSLMYMGVALDR.L<br>R.ANAPVIDLTR.V<br>K.DAYDYGYR.L<br>R.YRDNQDEVFLGHVSRS.A<br>R.LVEEGEAVAR.K<br>R.LIASDEFEAKDK.V<br>R.LAAALLEYETLSGEEAKR.V<br>K.GALLVSPGTGK.T<br>R.LAAALLEYETLSGEEAKR.R<br>R.RLVEEGEAVAR.K<br>R.KVLTDHIDELHR.L<br>R.GTTPVSGHVGGLPQIK.R<br>R.IAEQLIYGEDELNTGASNDIQQATEMAR.A<br>R.AQNMSEETAK.L<br>K.EVILSEDRVTGTLNSGDR.F |
| YP_616638 | Sala_1592 | Phosphomannose isomerase-like protein         | 33.21%            | 5                       | R.ETTERPEGIEAGTAR.L<br>K.AJEAJAGIARPDVAVIFVHPNPHVR.S<br>R.SAMEPLGALPNVALIDPLDYPHFVR.L<br>R.LLALSTLVLTDSGGVQEEAPSLGKPVLMR.E<br>R.LVTGLGEAFDAEKPR.I<br>R.EMLDQVLEIAR.I<br>R.IVSEIFSLDDDEGAYNAMAR.A<br>R.ITPDIDLDMVTPQSLDALLAR.L<br>R.IHVTGNTVIDALLATQAR.I<br>R.IEEEPSLAAGLPLAR.R<br>K.VTGAVADLHFAPTEAALAAAR.A<br>K.VHIEEVDLDGLVQGVVSR.G<br>R.AIAPQLVPGNLVILESTSPVGTTEK.V<br>R.GLWVQPSVGNTRFR.A<br>R.GDKIVYDTR.G<br>R.ESPVAEVAALAR.R<br>K.HVVTVNSGK.V<br>R.LETIIKEPWGR.T<br>R.ADAIALEPGAR.A<br>R.HAALDGTIVNMVDWR.A<br>R.CKEECWLVLAADPGAEGLVGLNAPPTSEALR.H<br>R.ELHDLGLAVALATKPVADPR.D<br>R.IGEIIALDAADNYLR.A<br>R.NTAPAIALAALAAAR.S<br>R.LHDGSGVIGFAGATADAFLLFER.L<br>R.RLHDGSGVIGFAGATADAFLLFER.L<br>R.AJADYKQPEVLAQK<br>R.NLEAMMIVADR.E<br>R.LHDGSGVIGFAGATADAFLLFERLEAK.L<br>R.VALADAEANGVFLDEIDKIAVDVVR.G<br>R.VELGALTEEDFVR.I<br>R.DLLPLIEGTTVATK.Y<br>K.AGLPEQYVALLGTEGVTLNFAPDAIAR.V<br>R.QQLPAELRDEVTPK.N<br>R.QLADVGDVTDLSK.Y<br>K.FTEVGYVGR.D<br>K.LAAEVNEKVENIGAR.R<br>K.AIVAAALDTHIIGQDAAR.K<br>R.RLQTHMR.L<br>R.DLVEEAVR.L<br>R.AAAEEAAMER.L<br>K.TDHILFIASGAFHVAKPSDLLPELQGR.L<br>K.AIVAAALDTHIIGQDAAR.A<br>R.VALADAEANGVFLDEIDK.I<br>R.LPIRVELGALTEEDFVR.I<br>K.LAAEVNEK.V<br>R.AGSTGAPGAATPGRQGG.<br>R.TLDPGETYQVPPAYIEQFTLR.T<br>K.AGGASAGVAENAPVLTGLSEVWIGFDDAEQK.T<br>R.FLSVPEDEALIAAQNR.D<br>R.DADASEPESAASTVPAAK.A<br>R.ELEEDYGSRLYEAEPDTPAR.L<br>R.EAAGLSLADVATR.T<br>R.DVPGVPADTLVK.N<br>R.AVNLPEAIEGAAIR.R<br>K.SDFSLEPGR.T<br>K.AGGASAGVAENAPVLTGLSEVWIGFDDAEQKTNQR.T<br>R.HAAIEKSDSELPGR.T<br>R.MTDEDVAPQGEALATR.T<br>K.NISLKPADLIAR.A<br>R.LADPAASEDTTPASLAPTVK.A<br>R.ELDEVYGDKAPQDVR.T<br>R.VDALETQLALITGQTEQNAFHLR.E<br>K.APAATAAVATPTR.P<br>R.TVFPNGNPTFFEGEAPDNTPGER.A<br>R.AYLDEGKPSLAAVAFYNNYK.D<br>K.APAATAAVATPTRPASK.P<br>K.AVEVPATGNETKDAYDYGYR.L<br>K.AVEVPATGNETK.D<br>K.WPQSSYASFAQNLGR.A<br>K.PGAKPAGPDAAR.L<br>R.APHSLMYMGVALDR.L<br>R.ANAPVIDLTR.V<br>K.DAYDYGYR.L<br>R.YRDNQDEVFLGHVSRS.A<br>R.LVEEGEAVAR.K<br>R.LIASDEFEAKDK.V<br>R.LAAALLEYETLSGEEAKR.V<br>K.GALLVSPGTGK.T<br>R.LAAALLEYETLSGEEAKR.R<br>R.RLVEEGEAVAR.K<br>R.KVLTDHIDELHR.L<br>R.GTTPVSGHVGGLPQIK.R<br>R.IAEQLIYGEDELNTGASNDIQQATEMAR.A<br>R.AQNMSEETAK.L<br>K.EVILSEDRVTGTLNSGDR.F |
| YP_616639 | Sala_1593 | Mannose-1-phosphate guanylyltransferase (GDP) | 8.12%             | 2                       | R.ETTERPEGIEAGTAR.L<br>K.AJEAJAGIARPDVAVIFVHPNPHVR.S<br>R.SAMEPLGALPNVALIDPLDYPHFVR.L<br>R.LLALSTLVLTDSGGVQEEAPSLGKPVLMR.E<br>R.LVTGLGEAFDAEKPR.I<br>R.EMLDQVLEIAR.I<br>R.IVSEIFSLDDDEGAYNAMAR.A<br>R.ITPDIDLDMVTPQSLDALLAR.L<br>R.IHVTGNTVIDALLATQAR.I<br>R.IEEEPSLAAGLPLAR.R<br>K.VTGAVADLHFAPTEAALAAAR.A<br>K.VHIEEVDLDGLVQGVVSR.G<br>R.AIAPQLVPGNLVILESTSPVGTTEK.V<br>R.GLWVQPSVGNTRFR.A<br>R.GDKIVYDTR.G<br>R.ESPVAEVAALAR.R<br>K.HVVTVNSGK.V<br>R.LETIIKEPWGR.T<br>R.ADAIALEPGAR.A<br>R.HAALDGTIVNMVDWR.A<br>R.CKEECWLVLAADPGAEGLVGLNAPPTSEALR.H<br>R.ELHDLGLAVALATKPVADPR.D<br>R.IGEIIALDAADNYLR.A<br>R.NTAPAIALAALAAAR.S<br>R.LHDGSGVIGFAGATADAFLLFER.L<br>R.RLHDGSGVIGFAGATADAFLLFER.L<br>R.AJADYKQPEVLAQK<br>R.NLEAMMIVADR.E<br>R.LHDGSGVIGFAGATADAFLLFERLEAK.L<br>R.VALADAEANGVFLDEIDKIAVDVVR.G<br>R.VELGALTEEDFVR.I<br>R.DLLPLIEGTTVATK.Y<br>K.AGLPEQYVALLGTEGVTLNFAPDAIAR.V<br>R.QQLPAELRDEVTPK.N<br>R.QLADVGDVTDLSK.Y<br>K.FTEVGYVGR.D<br>K.LAAEVNEKVENIGAR.R<br>K.AIVAAALDTHIIGQDAAR.K<br>R.RLQTHMR.L<br>R.DLVEEAVR.L<br>R.AAAEEAAMER.L<br>K.TDHILFIASGAFHVAKPSDLLPELQGR.L<br>K.AIVAAALDTHIIGQDAAR.A<br>R.VALADAEANGVFLDEIDK.I<br>R.LPIRVELGALTEEDFVR.I<br>K.LAAEVNEK.V<br>R.AGSTGAPGAATPGRQGG.<br>R.TLDPGETYQVPPAYIEQFTLR.T<br>K.AGGASAGVAENAPVLTGLSEVWIGFDDAEQK.T<br>R.FLSVPEDEALIAAQNR.D<br>R.DADASEPESAASTVPAAK.A<br>R.ELEEDYGSRLYEAEPDTPAR.L<br>R.EAAGLSLADVATR.T<br>R.DVPGVPADTLVK.N<br>R.AVNLPEAIEGAAIR.R<br>K.SDFSLEPGR.T<br>K.AGGASAGVAENAPVLTGLSEVWIGFDDAEQKTNQR.T<br>R.HAAIEKSDSELPGR.T<br>R.MTDEDVAPQGEALATR.T<br>K.NISLKPADLIAR.A<br>R.LADPAASEDTTPASLAPTVK.A<br>R.ELDEVYGDKAPQDVR.T<br>R.VDALETQLALITGQTEQNAFHLR.E<br>K.APAATAAVATPTR.P<br>R.TVFPNGNPTFFEGEAPDNTPGER.A<br>R.AYLDEGKPSLAAVAFYNNYK.D<br>K.APAATAAVATPTRPASK.P<br>K.AVEVPATGNETKDAYDYGYR.L<br>K.AVEVPATGNETK.D<br>K.WPQSSYASFAQNLGR.A<br>K.PGAKPAGPDAAR.L<br>R.APHSLMYMGVALDR.L<br>R.ANAPVIDLTR.V<br>K.DAYDYGYR.L<br>R.YRDNQDEVFLGHVSRS.A<br>R.LVEEGEAVAR.K<br>R.LIASDEFEAKDK.V<br>R.LAAALLEYETLSGEEAKR.V<br>K.GALLVSPGTGK.T<br>R.LAAALLEYETLSGEEAKR.R<br>R.RLVEEGEAVAR.K<br>R.KVLTDHIDELHR.L<br>R.GTTPVSGHVGGLPQIK.R<br>R.IAEQLIYGEDELNTGASNDIQQATEMAR.A<br>R.AQNMSEETAK.L<br>K.EVILSEDRVTGTLNSGDR.F |
| YP_616640 | Sala_1594 | 20S proteasome, A and B subunits              | 40.43%            | 5                       | R.ETTERPEGIEAGTAR.L<br>K.AJEAJAGIARPDVAVIFVHPNPHVR.S<br>R.SAMEPLGALPNVALIDPLDYPHFVR.L<br>R.LLALSTLVLTDSGGVQEEAPSLGKPVLMR.E<br>R.LVTGLGEAFDAEKPR.I<br>R.EMLDQVLEIAR.I<br>R.IVSEIFSLDDDEGAYNAMAR.A<br>R.ITPDIDLDMVTPQSLDALLAR.L<br>R.IHVTGNTVIDALLATQAR.I<br>R.IEEEPSLAAGLPLAR.R<br>K.VTGAVADLHFAPTEAALAAAR.A<br>K.VHIEEVDLDGLVQGVVSR.G<br>R.AIAPQLVPGNLVILESTSPVGTTEK.V<br>R.GLWVQPSVGNTRFR.A<br>R.GDKIVYDTR.G<br>R.ESPVAEVAALAR.R<br>K.HVVTVNSGK.V<br>R.LETIIKEPWGR.T<br>R.ADAIALEPGAR.A<br>R.HAALDGTIVNMVDWR.A<br>R.CKEECWLVLAADPGAEGLVGLNAPPTSEALR.H<br>R.ELHDLGLAVALATKPVADPR.D<br>R.IGEIIALDAADNYLR.A<br>R.NTAPAIALAALAAAR.S<br>R.LHDGSGVIGFAGATADAFLLFER.L<br>R.RLHDGSGVIGFAGATADAFLLFER.L<br>R.AJADYKQPEVLAQK<br>R.NLEAMMIVADR.E<br>R.LHDGSGVIGFAGATADAFLLFERLEAK.L<br>R.VALADAEANGVFLDEIDKIAVDVVR.G<br>R.VELGALTEEDFVR.I<br>R.DLLPLIEGTTVATK.Y<br>K.AGLPEQYVALLGTEGVTLNFAPDAIAR.V<br>R.QQLPAELRDEVTPK.N<br>R.QLADVGDVTDLSK.Y<br>K.FTEVGYVGR.D<br>K.LAAEVNEKVENIGAR.R<br>K.AIVAAALDTHIIGQDAAR.K<br>R.RLQTHMR.L<br>R.DLVEEAVR.L<br>R.AAAEEAAMER.L<br>K.TDHILFIASGAFHVAKPSDLLPELQGR.L<br>K.AIVAAALDTHIIGQDAAR.A<br>R.VALADAEANGVFLDEIDK.I<br>R.LPIRVELGALTEEDFVR.I<br>K.LAAEVNEK.V<br>R.AGSTGAPGAATPGRQGG.<br>R.TLDPGETYQVPPAYIEQFTLR.T<br>K.AGGASAGVAENAPVLTGLSEVWIGFDDAEQK.T<br>R.FLSVPEDEALIAAQNR.D<br>R.DADASEPESAASTVPAAK.A<br>R.ELEEDYGSRLYEAEPDTPAR.L<br>R.EAAGLSLADVATR.T<br>R.DVPGVPADTLVK.N<br>R.AVNLPEAIEGAAIR.R<br>K.SDFSLEPGR.T<br>K.AGGASAGVAENAPVLTGLSEVWIGFDDAEQKTNQR.T<br>R.HAAIEKSDSELPGR.T<br>R.MTDEDVAPQGEALATR.T<br>K.NISLKPADLIAR.A<br>R.LADPAASEDTTPASLAPTVK.A<br>R.ELDEVYGDKAPQDVR.T<br>R.VDALETQLALITGQTEQNAFHLR.E<br>K.APAATAAVATPTR.P<br>R.TVFPNGNPTFFEGEAPDNTPGER.A<br>R.AYLDEGKPSLAAVAFYNNYK.D<br>K.APAATAAVATPTRPASK.P<br>K.AVEVPATGNETKDAYDYGYR.L<br>K.AVEVPATGNETK.D<br>K.WPQSSYASFAQNLGR.A<br>K.PGAKPAGPDAAR.L<br>R.APHSLMYMGVALDR.L<br>R.ANAPVIDLTR.V<br>K.DAYDYGYR.L<br>R.YRDNQDEVFLGHVSRS.A<br>R.LVEEGEAVAR.K<br>R.LIASDEFEAKDK.V<br>R.LAAALLEYETLSGEEAKR.V<br>K.GALLVSPGTGK.T<br>R.LAAALLEYETLSGEEAKR.R<br>R.RLVEEGEAVAR.K<br>R.KVLTDHIDELHR.L<br>R.GTTPVSGHVGGLPQIK.R<br>R.IAEQLIYGEDELNTGASNDIQQATEMAR.A<br>R.AQNMSEETAK.L<br>K.EVILSEDRVTGTLNSGDR.F |
| YP_616641 | Sala_1595 | heat shock protein HslVU, ATPase subunit HslU | 47.58%            | 17                      | R.ETTERPEGIEAGTAR.L<br>K.AJEAJAGIARPDVAVIFVHPNPHVR.S<br>R.SAMEPLGALPNVALIDPLDYPHFVR.L<br>R.LLALSTLVLTDSGGVQEEAPSLGKPVLMR.E<br>R.LVTGLGEAFDAEKPR.I<br>R.EMLDQVLEIAR.I<br>R.IVSEIFSLDDDEGAYNAMAR.A<br>R.ITPDIDLDMVTPQSLDALLAR.L<br>R.IHVTGNTVIDALLATQAR.I<br>R.IEEEPSLAAGLPLAR.R<br>K.VTGAVADLHFAPTEAALAAAR.A<br>K.VHIEEVDLDGLVQGVVSR.G<br>R.AIAPQLVPGNLVILESTSPVGTTEK.V<br>R.GLWVQPSVGNTRFR.A<br>R.GDKIVYDTR.G<br>R.ESPVAEVAALAR.R<br>K.HVVTVNSGK.V<br>R.LETIIKEPWGR.T<br>R.ADAIALEPGAR.A<br>R.HAALDGTIVNMVDWR.A<br>R.CKEECWLVLAADPGAEGLVGLNAPPTSEALR.H<br>R.ELHDLGLAVALATKPVADPR.D<br>R.IGEIIALDAADNYLR.A<br>R.NTAPAIALAALAAAR.S<br>R.LHDGSGVIGFAGATADAFLLFER.L<br>R.RLHDGSGVIGFAGATADAFLLFER.L<br>R.AJADYKQPEVLAQK<br>R.NLEAMMIVADR.E                                                                                                                                                                                                                                                                                                                                                                                                                                                                                                                                                                                                                                                                                                                                                                                                                                                                                                                                                                                                                                                                                                                                                                                                                                                                                                                                                                                                                                                          |



| Accession | Locus tag | Description                                                             | Sequence coverage | No. peptides identified | List of peptides identified                                                                                                                                                                                                                                                                                                                                                                                                                                                                                                                                                                                                                                                                                                                                                                                                                                                                                                                                                                                                                                                                                                                                                                                                                                                                                                                                                                                                                                                                                                                                                                                                                                                                                                                                                                                                                                                                                                                                                                                                                                                                                                                                                                                                                                                                                                                                                                                                                                                                                                                                                                                                                                                                                                                                                                                                                                                                                                                                                                                                                                                                                                                                          |
|-----------|-----------|-------------------------------------------------------------------------|-------------------|-------------------------|----------------------------------------------------------------------------------------------------------------------------------------------------------------------------------------------------------------------------------------------------------------------------------------------------------------------------------------------------------------------------------------------------------------------------------------------------------------------------------------------------------------------------------------------------------------------------------------------------------------------------------------------------------------------------------------------------------------------------------------------------------------------------------------------------------------------------------------------------------------------------------------------------------------------------------------------------------------------------------------------------------------------------------------------------------------------------------------------------------------------------------------------------------------------------------------------------------------------------------------------------------------------------------------------------------------------------------------------------------------------------------------------------------------------------------------------------------------------------------------------------------------------------------------------------------------------------------------------------------------------------------------------------------------------------------------------------------------------------------------------------------------------------------------------------------------------------------------------------------------------------------------------------------------------------------------------------------------------------------------------------------------------------------------------------------------------------------------------------------------------------------------------------------------------------------------------------------------------------------------------------------------------------------------------------------------------------------------------------------------------------------------------------------------------------------------------------------------------------------------------------------------------------------------------------------------------------------------------------------------------------------------------------------------------------------------------------------------------------------------------------------------------------------------------------------------------------------------------------------------------------------------------------------------------------------------------------------------------------------------------------------------------------------------------------------------------------------------------------------------------------------------------------------------------|
|           |           |                                                                         |                   |                         | R.PFGDANPQGA.<br>R.VTGLNSGDR.F<br>R.NAPCVFIDEIDAVGR.H<br>R.GTPGFSADLANLNCNEAALLAAR.K<br>K.VLTDHIDELHR.L<br>R.VTFDDVAGIDEAREEEIEVFLKDPTK.F<br>R.IAEQLYGEDELNTGASNDIQATEMAR.A<br>R.GAGLNGNDER.E<br>R.FTANVVRDPDLK.M<br>R.AMUMEYGMSEK.L<br>R.ALGVTNLPER.D<br>R.RSEGVQIADVIANSFNIAVK.S<br>R.TLLNPLETR.A<br>R.VVIDDDTDPDEISSISR.S<br>K.DLHEALVGSLLQK.V<br>R.EISGSELVDR.D<br>R.EIAEQTIRPK.D<br>R.SPAGGGDFE.<br>R.LTAAAPRSPAGGGDFE.<br>K.VPNRFDLVLSAHR.A<br>R.VLRPGGAFVYQFR.A<br>R.FIAVHGSAADVEDVIR.A<br>R.ARDFLAAHAR.I<br>R.AHGFDHADYVLSGLPFTLPAGVGAIAAATHR.V<br>R.PVLEHLAGDATLIAIDTNEFDVYDLR.R<br>R.LNLEDGTIPSEVLDELVLR.A<br>K.AAPSLIFIDEISIAPK.R<br>R.GSGTSGEPQVTER.V<br>R.AVAPTFIFDELDSLVPAR.G<br>R.TTFGVGADMAALTR.E<br>K.WYGSEQQIAR.L<br>R.VVAPYPEDEGLNVIR.L<br>R.TNLVIAATNRPDAIDALR.R<br>R.GVLLHGGPGTGK.T<br>R.LRDFEAAAK.A<br>R.SFFGRPLVAGDVTATAGQQR.V<br>R.RTDVTVYDGLGGETIDQLR.E<br>R.VVFAPAENLR.L<br>R.LVAQLLTMGDLEPR.T<br>R.GMPLGDVWDELDELAR.T<br>R.ASVTEAMEKDYEK.I<br>R.ANAGAGADMVLSR.V<br>K.MPLAGVDLALLAER.T<br>K.GFLLYGPPGTGK.T<br>R.FTGADLEDLSR.R<br>R.VSAGMPPMLR.Q<br>R.WSDJGGLDAR.D<br>R.TDVTYDGLGGETIDQLR.E<br>R.PLVAGDVTATAGQQR.V<br>R.LQGSANALKR.S<br>R.AVANESEAQFFLINGPEIMGSAYGESEKR.L<br>R.AEESGGGIAR.I<br>K.AMSVDPIFFAPGMLKPVIR.D<br>R.LDELIVSVPR.E<br>K.GVVTIDENTEVLLPEYQEPHDAR.R<br>R.SIGADVTMADFEALKDTR.A<br>R.SIGADVTMADFEALK.D<br>R.LDELIVSVPRDREGR.R<br>R.GQVHGEAEKR.L<br>R.EIIVGVPEK.G<br>R.AAMAEGLSEGDVQVSGKR.D<br>R.AAMAEGLSEGDVQVSGKR.R<br>K.SDLSLW<br>R.LGDDIDAIALAR.S<br>R.LHLNVLPLFAQQR.L<br>R.FEYLTSEASFAK.Y<br>R.IASELPAAPQR.F<br>R.VVAGIEHLSSLPR.G<br>R.VQDNYVQWGDATEK.K<br>R.NLSPDTGSAELYVIGHAPR.H<br>K.LAAAHWWDGTSINR.V<br>R.DPPAETLVFR.G<br>R.VVIQLMPAPFSQWIGNIR.K<br>R.VQDNYVQWGDATEK.A<br>R.GTGALGFYEEAQRVPIASVR.I<br>R.GTGALGFYEEAQR.V<br>R.ESEYEAPLDKYLQALHTK.M<br>R.ESEYEAPLDK.Y<br>K.MKSEAGLLAAFR.Q<br>R.TNAETPQDAR.V<br>K.TVVGLAEASGDR.F<br>R.LLDPLLEFLPTREEDFADVAAAAGVGIEALK.A<br>R.VFDLTHYR.D<br>R.FGDVAVDPLLSVR.S<br>K.TGLDYSASPYR.V<br>K.DQLWGAIVGAVFASWESDR.A<br>R.VDPGALQLLHPTLDPK.A<br>R.GDFAIFGVMAGLPTVTR.L<br>R.LAAQAALRK.<br>R.VETSPDHGMHAHK.G<br>R.EIAYLVGTMIELPR.A<br>R.GGMTSHAAVVAR.G<br>R.LAAQAALR.K<br>R.AWYGEWLINAQGEDVVAGIR.T<br>K.GFYLDTEMAEDWQALVK.Q<br>R.VSNPQHMDTVLNLGLNDK.T<br>R.LGVTYPETEYMQAR.A<br>R.ANELHEFNMLGHR.G<br>K.RFGDAVDPLLSVR.S<br>K.MVHLFGGAVTTAER.S<br>R.TEHMFFDAAR.I<br>R.GKLWMLQTR.S<br>R.DMQDEFTVER.G<br>R.DFGAEGIGLCTR.T<br>K.GREIAYLVGTMIELPR.A<br>K.GLPASPGAASGK.I<br>K.GIFLTDPFVSLDVEGVQLEIAAER.G<br>K.AAAMGEAVILLR.V<br>R.TPQYTK.A<br>R.FLTQYVVK.G<br>R.EMILADSEGR.R<br>K.TGLDYSASPYRVPIAR.L<br>K.QYQAIVER.E<br>K.LWMLQTR.S<br>K.IIMPDAESA.K<br>K.GLPASPGAASGKIMFADSAEK.A<br>K.AAAMGEAVILLR.V<br>R.GGAAQVLEEGTPGLR.L<br>R.AGLGIIALTVR.S<br>R.HDLIDAVFALGEGEDDLVR.L<br>R.FTGAVHGVADFSK.I<br>R.ATAEVLAEJAIPIVR.A<br>R.FDEAFVAVPEVIQIATR.V<br>R.AEGLPQAVADAIR.D<br>K.AAADAGLSLVEDEGLVIENAGLIEWPVPLLGR.F<br>R.FTDAMAALASLR.A<br>R.DLDPATAVSSEELKGR.T<br>R.APIDAFFEGVMVNDPDEVIR.A<br>R.YFVDQDIVDEREYDAYTK.D<br>R.TSAPPQALEGFLR.K<br>R.GDIGTWLAAAR.R<br>K.ADLVTEMVGEFPELQGLMGYYAR.A<br>R.DSASSELR.W<br>K.YFVNDADGK.L<br>K.LGTVADKVER.V<br>K.DAASIGLATVFMDEVRFIADR.L<br>R.YFVDQDIVDER.E |
| YP_616647 | Sala_1601 | hypothetical protein                                                    | 12.65%            | 2                       |                                                                                                                                                                                                                                                                                                                                                                                                                                                                                                                                                                                                                                                                                                                                                                                                                                                                                                                                                                                                                                                                                                                                                                                                                                                                                                                                                                                                                                                                                                                                                                                                                                                                                                                                                                                                                                                                                                                                                                                                                                                                                                                                                                                                                                                                                                                                                                                                                                                                                                                                                                                                                                                                                                                                                                                                                                                                                                                                                                                                                                                                                                                                                                      |
| YP_616648 | Sala_1602 | DNA-directed RNA polymerase, omega subunit                              | 72.81%            | 7                       |                                                                                                                                                                                                                                                                                                                                                                                                                                                                                                                                                                                                                                                                                                                                                                                                                                                                                                                                                                                                                                                                                                                                                                                                                                                                                                                                                                                                                                                                                                                                                                                                                                                                                                                                                                                                                                                                                                                                                                                                                                                                                                                                                                                                                                                                                                                                                                                                                                                                                                                                                                                                                                                                                                                                                                                                                                                                                                                                                                                                                                                                                                                                                                      |
| YP_616650 | Sala_1604 | Methyltransferase type 12                                               | 47.17%            | 5                       |                                                                                                                                                                                                                                                                                                                                                                                                                                                                                                                                                                                                                                                                                                                                                                                                                                                                                                                                                                                                                                                                                                                                                                                                                                                                                                                                                                                                                                                                                                                                                                                                                                                                                                                                                                                                                                                                                                                                                                                                                                                                                                                                                                                                                                                                                                                                                                                                                                                                                                                                                                                                                                                                                                                                                                                                                                                                                                                                                                                                                                                                                                                                                                      |
| YP_616652 | Sala_1606 | AAA family ATPase, CDC48 subfamily                                      | 64.04%            | 38                      |                                                                                                                                                                                                                                                                                                                                                                                                                                                                                                                                                                                                                                                                                                                                                                                                                                                                                                                                                                                                                                                                                                                                                                                                                                                                                                                                                                                                                                                                                                                                                                                                                                                                                                                                                                                                                                                                                                                                                                                                                                                                                                                                                                                                                                                                                                                                                                                                                                                                                                                                                                                                                                                                                                                                                                                                                                                                                                                                                                                                                                                                                                                                                                      |
| YP_616653 | Sala_1607 | transcriptional regulator, LysR family                                  | 8.90%             | 2                       |                                                                                                                                                                                                                                                                                                                                                                                                                                                                                                                                                                                                                                                                                                                                                                                                                                                                                                                                                                                                                                                                                                                                                                                                                                                                                                                                                                                                                                                                                                                                                                                                                                                                                                                                                                                                                                                                                                                                                                                                                                                                                                                                                                                                                                                                                                                                                                                                                                                                                                                                                                                                                                                                                                                                                                                                                                                                                                                                                                                                                                                                                                                                                                      |
| YP_616655 | Sala_1609 | putative secreted peptidyl prolyl cis-trans isomerase, cyclophilin type | 51.19%            | 14                      |                                                                                                                                                                                                                                                                                                                                                                                                                                                                                                                                                                                                                                                                                                                                                                                                                                                                                                                                                                                                                                                                                                                                                                                                                                                                                                                                                                                                                                                                                                                                                                                                                                                                                                                                                                                                                                                                                                                                                                                                                                                                                                                                                                                                                                                                                                                                                                                                                                                                                                                                                                                                                                                                                                                                                                                                                                                                                                                                                                                                                                                                                                                                                                      |
| YP_616656 | Sala_1610 | Pyruvate, phosphate dikinase                                            | 49.15%            | 38                      |                                                                                                                                                                                                                                                                                                                                                                                                                                                                                                                                                                                                                                                                                                                                                                                                                                                                                                                                                                                                                                                                                                                                                                                                                                                                                                                                                                                                                                                                                                                                                                                                                                                                                                                                                                                                                                                                                                                                                                                                                                                                                                                                                                                                                                                                                                                                                                                                                                                                                                                                                                                                                                                                                                                                                                                                                                                                                                                                                                                                                                                                                                                                                                      |
| YP_616657 | Sala_1611 | Glycine--tRNA ligase                                                    | 58.37%            | 30                      |                                                                                                                                                                                                                                                                                                                                                                                                                                                                                                                                                                                                                                                                                                                                                                                                                                                                                                                                                                                                                                                                                                                                                                                                                                                                                                                                                                                                                                                                                                                                                                                                                                                                                                                                                                                                                                                                                                                                                                                                                                                                                                                                                                                                                                                                                                                                                                                                                                                                                                                                                                                                                                                                                                                                                                                                                                                                                                                                                                                                                                                                                                                                                                      |

| Accession | Locus tag | Description                                               | Sequence coverage | No. peptides identified | List of peptides identified                                                                                                                                                                                                                                                                                                                                                                                                                                                                                                                                                                                                                                                                                                                                                                                                                                                                                                                                                                                                                                                                                                                                                                                                                                                                                                                                                                                                                                                                                                                                                                                                                                                                                                                                                                                                                                                                                                                                                                                                                                                                                                                                                                                                                                                                                                                                                                                                                                                                                                                                                                                                                                                                                                                                                                                                                                                                                                                                                                                                                                                                                                                                                                                                                                                                                                                |
|-----------|-----------|-----------------------------------------------------------|-------------------|-------------------------|--------------------------------------------------------------------------------------------------------------------------------------------------------------------------------------------------------------------------------------------------------------------------------------------------------------------------------------------------------------------------------------------------------------------------------------------------------------------------------------------------------------------------------------------------------------------------------------------------------------------------------------------------------------------------------------------------------------------------------------------------------------------------------------------------------------------------------------------------------------------------------------------------------------------------------------------------------------------------------------------------------------------------------------------------------------------------------------------------------------------------------------------------------------------------------------------------------------------------------------------------------------------------------------------------------------------------------------------------------------------------------------------------------------------------------------------------------------------------------------------------------------------------------------------------------------------------------------------------------------------------------------------------------------------------------------------------------------------------------------------------------------------------------------------------------------------------------------------------------------------------------------------------------------------------------------------------------------------------------------------------------------------------------------------------------------------------------------------------------------------------------------------------------------------------------------------------------------------------------------------------------------------------------------------------------------------------------------------------------------------------------------------------------------------------------------------------------------------------------------------------------------------------------------------------------------------------------------------------------------------------------------------------------------------------------------------------------------------------------------------------------------------------------------------------------------------------------------------------------------------------------------------------------------------------------------------------------------------------------------------------------------------------------------------------------------------------------------------------------------------------------------------------------------------------------------------------------------------------------------------------------------------------------------------------------------------------------------------|
|           |           |                                                           |                   |                         | K.ALQAFMATEDGNTNLLAGYK.R<br>R.EAGVRHDLIDAVFALGGEDDLVR.L<br>R.DGVWFAVDKPKGR.A<br>K.TSLTQDQLEDR.D<br>K.LAEWLANEGIVPNCDPALAR.Q<br>R.RYFVDQDIVDEREYDAYATK.D<br>R.KTGLTQDQLEDR.D<br>R.DHYKPVGGDDVPTAPVTVVALADK.L<br>K.TGLTQDQLEDRDGVWFAVDKPKGR.A<br>K.QASVPAEAGTR.G<br>R.FSDPVGVDVGVSYGDVFLENER.Q<br>R.SLGPPEWNAVYVQPSR.R<br>K.WNFEVADTALFAGFK.A<br>R.VGAGTFHPATL.R.S<br>R.LAMYIQNVVNDVYDLR.F<br>R.AIDAGVPLAAYDQAEASHLFLNLLQAR.G<br>K.KPLSFQDMILLTHAVWSAR.G<br>K.AWIDSQSER.W<br>R.ASGKPVAGFETLGEQLGFFDSLPEAQI AFLNSVVK.D<br>K.LGYDPEQGAEK.Q<br>K.GDPDGLAVAMNESLAATPALAQTLLYDR.N<br>R.MEQPSTVAVGAGHLAGEK.S<br>R.GLTVTRVDY.<br>K.DLKLGLPTLDR.M<br>R.TMLPLAIDANGTTLTSR.L<br>K.SVQDYLKER.G<br>K.SSDGDTTKDEGEDAAEGDEA.<br>K.GVESAITDRDFTIATVAPSALK.S<br>K.DATVQVAVPVVFQNEEK.S<br>R.VPAVVYGGKEEPLMIHVEEK.L<br>K.RGGVLNIVR.H<br>K.DVAFHPK.D<br>K.QLMTGFPMNSVMIEVGGK.Q<br>R.TLPKDVAFHPK.D<br>R.GGVLNIVR.H<br>K.GVESAITDR.D<br>R.VPAVVYGGK.E<br>R.DFTIATVAPSALK.S<br>K.DEGEDAAEGDEA.<br>K.DATVQVAVPVVFQNEEKSPGLK.R<br>K.EEPLMIHVEEK.L<br>K.DRPIHADFLR.I<br>R.VPAVVYGGKEEPLMIHVEEK.L<br>R.NGRVPAVVYGGK.E<br>R.IAKDATVQVAVPVVFQNEEK.S<br>K.DVAFHPKDRPIHADFLR.I<br>K.QLMTGFPMNSVMIEVGGK.Q<br>K.GGQVFNISQLGR.V<br>R.AVHPGTRPQAINR.V<br>R.GAEEGIDILTR.E<br>R.EGVAVDEAIR.E<br>R.AAADHVAQVSR.S<br>K.IATSVLGGQALLDLR.E<br>K.IIATQLAFVDIAGLVR.G<br>R.AWTVHQGATAPEAAGEIHSDFQK.G<br>R.AGYELLHLITFTVGR.E<br>K.GEGLNQFLGNIR.E<br>R.AETIAYDDYVALGGEAR.A<br>K.VDPVADAEVETELLADLESLEK.R<br>K.AAQGDKEAK.I<br>K.KIATQLAFVDIAGLVR.G<br>R.LVEPQDDEEAR.V<br>R.EVDAIVHLR.C<br>K.AYVHDGDMVHFLHS.<br>K.AAEGAQVAVVSAIESELVMDMADRLEFLAEMGLK.E<br>K.AQVGVQITPTQIDGVR.I<br>R.FATMFLNVDLLAR.R<br>K.IVNLDVWAGYEVAR.T<br>R.TAYQTLDDIDQAVR.S<br>R.ALFDLDFR.T<br>R.YGDLMAHQDLDR.Q<br>R.VGTDLWAR.M<br>R.SVHAHLSFDDHEIR.N<br>R.QDYLFDDGLPIRVR.Q<br>R.EDLAVVHYGDFTYEYR.Q<br>R.TLSVAEMNALLR.Q<br>R.LVTDIADDLAGYDAALGNLR.L<br>R.AEVAATPPAAEHRIGAR.G<br>K.EISINQAQAEALSEPIGTIVEGVR.I<br>R.RHHNLLIGESTAER.I<br>R.GLAYTTSVR.A<br>R.RHHNLLIGESTAER.I<br>R.IPADVGLTIHK.G<br>K.GIVLNPSVAVETLNGIKR.R<br>K.GIVLNPSVAVETLNGIKR.V<br>K.FNSQDMAIDLTANTVYVVR.G<br>R.AGGDKMDEAIVSYVR.R<br>R.SPEIVCPSGSTSVR.R<br>R.KGKGLVNEPSSVAVETLNGIKR.R<br>R.DATGLPVTVADPLTCAIGTGR.A<br>K.VHGGKPAFR.S<br>K.MDEAIVSYVR.R<br>R.QLVATSSLQENR.Q<br>R.IASQELAAPIAR.G<br>R.TLIANNPKPGDILVTSGTGLYPPNIPVAIVR.R<br>R.NLGVAGQPR.G<br>R.SVIGSISGIDSVGAYVAQSQR.R<br>K.LQETDKALANGYLLTSTSSR.R<br>R.DLDTQPDVQK.T<br>R.YATGVIHGMGGSR.A<br>R.QFTNEPLPFAEALAVAR.A<br>R.IGLVSEIVPLGELWPR.A<br>K.AIVQSLDR.S<br>R.AAVDALALVSR.R<br>R.TVDDIHWSTQQR.G<br>K.AQQGLVEYDAVAR.L<br>K.VAVNAATLLR.R<br>K.AFDAPLITWNIK.S<br>K.LPVLLEDEKADIEFPNDLLQELDR.M<br>K.LLLAEDMPLVQNR.D<br>R.FEGTSAYIATDDLK.V<br>R.SIGSLAAEAGGLVTEIQSGVEQSSR.A<br>R.LGTHVNFVAAMVQVQVQSIESIAK.T<br>R.DNSSTLAQR.D<br>R.AEAQFETTDALHDATHLVALLDDQSDR.I<br>K.SAAEIALMQIANDITLAAYR.H<br>R.EGEVAVIPTFFPEPSVR.E<br>R.KGQDVFAAAK.L<br>K.WFSEPPSIDRPPA.<br>K.AMPDATTVNGAPVVR.G<br>R.VWINSPNAAVWVAR.A<br>R.WALLAHPASVADTLHSLDALVAAGVK.V<br>R.GTTRPLELFGAPDIDAK.A<br>K.YEYTDVLDVINGGPGPLR.E<br>R.HFGLVDYR.V<br>R.DIWFQPTFK.H<br>K.VSAVFRQHQVR.G<br>R.SDQLAPVIEAER.S<br>K.IGLSAVIEER.D<br>R.GDWDSISNLAQ.G<br>K.KMALIRGWDVSNLAKGNPSTGSGRTER.D<br>K.LFTDLPLAEIAR.L<br>R.IGGDLPHVAAPADIGIVDALR.E<br>R.GVDAASTAETATQTEFK.G<br>K.IGYIELQEVGR.H<br>R.QLVLFGDPTDAMVDNQDWLGLK.L<br>R.LEALEGAEINEAKK.I |
| YP_616658 | Sala_1612 | Glycine--tRNA ligase                                      | 41.64%            | 8                       |                                                                                                                                                                                                                                                                                                                                                                                                                                                                                                                                                                                                                                                                                                                                                                                                                                                                                                                                                                                                                                                                                                                                                                                                                                                                                                                                                                                                                                                                                                                                                                                                                                                                                                                                                                                                                                                                                                                                                                                                                                                                                                                                                                                                                                                                                                                                                                                                                                                                                                                                                                                                                                                                                                                                                                                                                                                                                                                                                                                                                                                                                                                                                                                                                                                                                                                                            |
| YP_616661 | Sala_1615 | GumN                                                      | 43.65%            | 8                       |                                                                                                                                                                                                                                                                                                                                                                                                                                                                                                                                                                                                                                                                                                                                                                                                                                                                                                                                                                                                                                                                                                                                                                                                                                                                                                                                                                                                                                                                                                                                                                                                                                                                                                                                                                                                                                                                                                                                                                                                                                                                                                                                                                                                                                                                                                                                                                                                                                                                                                                                                                                                                                                                                                                                                                                                                                                                                                                                                                                                                                                                                                                                                                                                                                                                                                                                            |
| YP_616663 | Sala_1617 | ribosomal 5S rRNA E-loop binding protein Ctc/L25/T5       | 83.02%            | 21                      |                                                                                                                                                                                                                                                                                                                                                                                                                                                                                                                                                                                                                                                                                                                                                                                                                                                                                                                                                                                                                                                                                                                                                                                                                                                                                                                                                                                                                                                                                                                                                                                                                                                                                                                                                                                                                                                                                                                                                                                                                                                                                                                                                                                                                                                                                                                                                                                                                                                                                                                                                                                                                                                                                                                                                                                                                                                                                                                                                                                                                                                                                                                                                                                                                                                                                                                                            |
| YP_616665 | Sala_1619 | short-chain dehydrogenase/reductase SDR                   | 8.21%             | 2                       |                                                                                                                                                                                                                                                                                                                                                                                                                                                                                                                                                                                                                                                                                                                                                                                                                                                                                                                                                                                                                                                                                                                                                                                                                                                                                                                                                                                                                                                                                                                                                                                                                                                                                                                                                                                                                                                                                                                                                                                                                                                                                                                                                                                                                                                                                                                                                                                                                                                                                                                                                                                                                                                                                                                                                                                                                                                                                                                                                                                                                                                                                                                                                                                                                                                                                                                                            |
| YP_616666 | Sala_1620 | Allergen V5/Tpx-1 related                                 | 15.67%            | 3                       |                                                                                                                                                                                                                                                                                                                                                                                                                                                                                                                                                                                                                                                                                                                                                                                                                                                                                                                                                                                                                                                                                                                                                                                                                                                                                                                                                                                                                                                                                                                                                                                                                                                                                                                                                                                                                                                                                                                                                                                                                                                                                                                                                                                                                                                                                                                                                                                                                                                                                                                                                                                                                                                                                                                                                                                                                                                                                                                                                                                                                                                                                                                                                                                                                                                                                                                                            |
| YP_616667 | Sala_1621 | hypothetical protein                                      | 56.71%            | 13                      |                                                                                                                                                                                                                                                                                                                                                                                                                                                                                                                                                                                                                                                                                                                                                                                                                                                                                                                                                                                                                                                                                                                                                                                                                                                                                                                                                                                                                                                                                                                                                                                                                                                                                                                                                                                                                                                                                                                                                                                                                                                                                                                                                                                                                                                                                                                                                                                                                                                                                                                                                                                                                                                                                                                                                                                                                                                                                                                                                                                                                                                                                                                                                                                                                                                                                                                                            |
| YP_616670 | Sala_1624 | hypothetical protein                                      | 12.24%            | 2                       |                                                                                                                                                                                                                                                                                                                                                                                                                                                                                                                                                                                                                                                                                                                                                                                                                                                                                                                                                                                                                                                                                                                                                                                                                                                                                                                                                                                                                                                                                                                                                                                                                                                                                                                                                                                                                                                                                                                                                                                                                                                                                                                                                                                                                                                                                                                                                                                                                                                                                                                                                                                                                                                                                                                                                                                                                                                                                                                                                                                                                                                                                                                                                                                                                                                                                                                                            |
| YP_616671 | Sala_1625 | Twin-arginine translocation pathway signal                | 20.73%            | 8                       |                                                                                                                                                                                                                                                                                                                                                                                                                                                                                                                                                                                                                                                                                                                                                                                                                                                                                                                                                                                                                                                                                                                                                                                                                                                                                                                                                                                                                                                                                                                                                                                                                                                                                                                                                                                                                                                                                                                                                                                                                                                                                                                                                                                                                                                                                                                                                                                                                                                                                                                                                                                                                                                                                                                                                                                                                                                                                                                                                                                                                                                                                                                                                                                                                                                                                                                                            |
| YP_616672 | Sala_1626 | DNA mismatch repair protein MutL                          | 8.79%             | 3                       |                                                                                                                                                                                                                                                                                                                                                                                                                                                                                                                                                                                                                                                                                                                                                                                                                                                                                                                                                                                                                                                                                                                                                                                                                                                                                                                                                                                                                                                                                                                                                                                                                                                                                                                                                                                                                                                                                                                                                                                                                                                                                                                                                                                                                                                                                                                                                                                                                                                                                                                                                                                                                                                                                                                                                                                                                                                                                                                                                                                                                                                                                                                                                                                                                                                                                                                                            |
| YP_616673 | Sala_1627 | cell shape determining protein, MreB/Mrl family           | 53.74%            | 14                      |                                                                                                                                                                                                                                                                                                                                                                                                                                                                                                                                                                                                                                                                                                                                                                                                                                                                                                                                                                                                                                                                                                                                                                                                                                                                                                                                                                                                                                                                                                                                                                                                                                                                                                                                                                                                                                                                                                                                                                                                                                                                                                                                                                                                                                                                                                                                                                                                                                                                                                                                                                                                                                                                                                                                                                                                                                                                                                                                                                                                                                                                                                                                                                                                                                                                                                                                            |
| YP_616674 | Sala_1628 | rod shape-determining protein MreC                        | 39.33%            | 6                       |                                                                                                                                                                                                                                                                                                                                                                                                                                                                                                                                                                                                                                                                                                                                                                                                                                                                                                                                                                                                                                                                                                                                                                                                                                                                                                                                                                                                                                                                                                                                                                                                                                                                                                                                                                                                                                                                                                                                                                                                                                                                                                                                                                                                                                                                                                                                                                                                                                                                                                                                                                                                                                                                                                                                                                                                                                                                                                                                                                                                                                                                                                                                                                                                                                                                                                                                            |
| YP_616676 | Sala_1630 | Peptidoglycan glycosyltransferase                         | 6.92%             | 3                       |                                                                                                                                                                                                                                                                                                                                                                                                                                                                                                                                                                                                                                                                                                                                                                                                                                                                                                                                                                                                                                                                                                                                                                                                                                                                                                                                                                                                                                                                                                                                                                                                                                                                                                                                                                                                                                                                                                                                                                                                                                                                                                                                                                                                                                                                                                                                                                                                                                                                                                                                                                                                                                                                                                                                                                                                                                                                                                                                                                                                                                                                                                                                                                                                                                                                                                                                            |
| YP_616680 | Sala_1634 | Enoyl-CoA hydratase/isomerase                             | 9.77%             | 2                       |                                                                                                                                                                                                                                                                                                                                                                                                                                                                                                                                                                                                                                                                                                                                                                                                                                                                                                                                                                                                                                                                                                                                                                                                                                                                                                                                                                                                                                                                                                                                                                                                                                                                                                                                                                                                                                                                                                                                                                                                                                                                                                                                                                                                                                                                                                                                                                                                                                                                                                                                                                                                                                                                                                                                                                                                                                                                                                                                                                                                                                                                                                                                                                                                                                                                                                                                            |
| YP_616683 | Sala_1637 | Acetyl-CoA C-acyltransferase                              | 6.01%             | 2                       |                                                                                                                                                                                                                                                                                                                                                                                                                                                                                                                                                                                                                                                                                                                                                                                                                                                                                                                                                                                                                                                                                                                                                                                                                                                                                                                                                                                                                                                                                                                                                                                                                                                                                                                                                                                                                                                                                                                                                                                                                                                                                                                                                                                                                                                                                                                                                                                                                                                                                                                                                                                                                                                                                                                                                                                                                                                                                                                                                                                                                                                                                                                                                                                                                                                                                                                                            |
| YP_616685 | Sala_1639 | ATPase associated with various cellular activities, AAA_5 | 32.03%            | 6                       |                                                                                                                                                                                                                                                                                                                                                                                                                                                                                                                                                                                                                                                                                                                                                                                                                                                                                                                                                                                                                                                                                                                                                                                                                                                                                                                                                                                                                                                                                                                                                                                                                                                                                                                                                                                                                                                                                                                                                                                                                                                                                                                                                                                                                                                                                                                                                                                                                                                                                                                                                                                                                                                                                                                                                                                                                                                                                                                                                                                                                                                                                                                                                                                                                                                                                                                                            |
| YP_616687 | Sala_1641 | methyl-accepting chemotaxis sensory transducer            | 18.75%            | 4                       |                                                                                                                                                                                                                                                                                                                                                                                                                                                                                                                                                                                                                                                                                                                                                                                                                                                                                                                                                                                                                                                                                                                                                                                                                                                                                                                                                                                                                                                                                                                                                                                                                                                                                                                                                                                                                                                                                                                                                                                                                                                                                                                                                                                                                                                                                                                                                                                                                                                                                                                                                                                                                                                                                                                                                                                                                                                                                                                                                                                                                                                                                                                                                                                                                                                                                                                                            |
| YP_616691 | Sala_1645 | Twin-arginine translocation pathway signal                | 18.60%            | 5                       |                                                                                                                                                                                                                                                                                                                                                                                                                                                                                                                                                                                                                                                                                                                                                                                                                                                                                                                                                                                                                                                                                                                                                                                                                                                                                                                                                                                                                                                                                                                                                                                                                                                                                                                                                                                                                                                                                                                                                                                                                                                                                                                                                                                                                                                                                                                                                                                                                                                                                                                                                                                                                                                                                                                                                                                                                                                                                                                                                                                                                                                                                                                                                                                                                                                                                                                                            |
| YP_616692 | Sala_1646 | Uncharacterized conserved protein UCP016719               | 27.61%            | 7                       |                                                                                                                                                                                                                                                                                                                                                                                                                                                                                                                                                                                                                                                                                                                                                                                                                                                                                                                                                                                                                                                                                                                                                                                                                                                                                                                                                                                                                                                                                                                                                                                                                                                                                                                                                                                                                                                                                                                                                                                                                                                                                                                                                                                                                                                                                                                                                                                                                                                                                                                                                                                                                                                                                                                                                                                                                                                                                                                                                                                                                                                                                                                                                                                                                                                                                                                                            |
| YP_616693 | Sala_1647 | hypothetical protein                                      | 12.23%            | 2                       |                                                                                                                                                                                                                                                                                                                                                                                                                                                                                                                                                                                                                                                                                                                                                                                                                                                                                                                                                                                                                                                                                                                                                                                                                                                                                                                                                                                                                                                                                                                                                                                                                                                                                                                                                                                                                                                                                                                                                                                                                                                                                                                                                                                                                                                                                                                                                                                                                                                                                                                                                                                                                                                                                                                                                                                                                                                                                                                                                                                                                                                                                                                                                                                                                                                                                                                                            |
| YP_616694 | Sala_1648 | Excinuclease ABC, C subunit-like protein                  | 26.50%            | 2                       |                                                                                                                                                                                                                                                                                                                                                                                                                                                                                                                                                                                                                                                                                                                                                                                                                                                                                                                                                                                                                                                                                                                                                                                                                                                                                                                                                                                                                                                                                                                                                                                                                                                                                                                                                                                                                                                                                                                                                                                                                                                                                                                                                                                                                                                                                                                                                                                                                                                                                                                                                                                                                                                                                                                                                                                                                                                                                                                                                                                                                                                                                                                                                                                                                                                                                                                                            |
| YP_616695 | Sala_1649 | tyrosyl-tRNA synthetase                                   | 72.27%            | 23                      |                                                                                                                                                                                                                                                                                                                                                                                                                                                                                                                                                                                                                                                                                                                                                                                                                                                                                                                                                                                                                                                                                                                                                                                                                                                                                                                                                                                                                                                                                                                                                                                                                                                                                                                                                                                                                                                                                                                                                                                                                                                                                                                                                                                                                                                                                                                                                                                                                                                                                                                                                                                                                                                                                                                                                                                                                                                                                                                                                                                                                                                                                                                                                                                                                                                                                                                                            |

| Accession | Locus tag | Description                                       | Sequence coverage | No. peptides identified | List of peptides identified                                                                                                                                                                                                                                                                                                                                                                                                                                                                                                                                                                                                                                                                                                                                                                                                                                                                                                                                                                                                                                                                                                                                                                                                                                                                                                                                                                                                                                                                                                                                                                                                                                                                                                                                                                                                                                                                                                                                                                                                                                                                                                                                                                                                                                                                                                                                                                                                                                                                                                                                                                                                                                                                                                                                                                                                                                                                                                                               |
|-----------|-----------|---------------------------------------------------|-------------------|-------------------------|-----------------------------------------------------------------------------------------------------------------------------------------------------------------------------------------------------------------------------------------------------------------------------------------------------------------------------------------------------------------------------------------------------------------------------------------------------------------------------------------------------------------------------------------------------------------------------------------------------------------------------------------------------------------------------------------------------------------------------------------------------------------------------------------------------------------------------------------------------------------------------------------------------------------------------------------------------------------------------------------------------------------------------------------------------------------------------------------------------------------------------------------------------------------------------------------------------------------------------------------------------------------------------------------------------------------------------------------------------------------------------------------------------------------------------------------------------------------------------------------------------------------------------------------------------------------------------------------------------------------------------------------------------------------------------------------------------------------------------------------------------------------------------------------------------------------------------------------------------------------------------------------------------------------------------------------------------------------------------------------------------------------------------------------------------------------------------------------------------------------------------------------------------------------------------------------------------------------------------------------------------------------------------------------------------------------------------------------------------------------------------------------------------------------------------------------------------------------------------------------------------------------------------------------------------------------------------------------------------------------------------------------------------------------------------------------------------------------------------------------------------------------------------------------------------------------------------------------------------------------------------------------------------------------------------------------------------------|
|           |           |                                                   |                   |                         | R.MDGADLYGLTLLTTAAGAK.M<br>R.IVPAGGDIATSLGAK.K<br>R.LEALEGAEINEAK.K<br>K.MLSDEVIAANIASISFIFR.Q<br>K.TAAGAVWLNPEQLSHFDYQWYR.N<br>R.LQQTGHKPIVLMGGGTR.I<br>R.GYHQMTEADGLDALAAK.Q<br>R.LQMGGSQWGNVINGMELGR.R<br>R.RMDGADLYGLTLLTTAAGAK.M<br>R.NCDDRDVYK.F<br>R.MDGADLYGLTLLTTAAGAK.M<br>R.KMLSDEVIAANIASISFIFR.Q<br>R.KLEEGAVR.V<br>R.IGGDLPHVAAPADGIGIVDALRELGFAASNK.E<br>R.GVDAASTAAETATQTFEGR.I<br>K.QVPSYIGFDATAPSLHVGSLVQIMMLR.R<br>K.KILANEATACR.G                                                                                                                                                                                                                                                                                                                                                                                                                                                                                                                                                                                                                                                                                                                                                                                                                                                                                                                                                                                                                                                                                                                                                                                                                                                                                                                                                                                                                                                                                                                                                                                                                                                                                                                                                                                                                                                                                                                                                                                                                                                                                                                                                                                                                                                                                                                                                                                                                                                                                                     |
| YP_616696 | Sala_1650 | type IV pilus assembly PilZ                       | 26.55%            | 2                       | K.TGVQFEKSIQVSDYLPIMR.A<br>R.GLEPGDLIVR.M<br>R.LVDVLFHPLTGLISR.I<br>R.LSQAALADR.R<br>R.LPFGLTGAQR.V<br>R.GGCELLK.Q<br>R.AMLTAVEAGTQAALLAPTEILAR.Q<br>R.SAADILAAIASAAAPLTLAR.A<br>R.DHGVTSLVQVDTWQALGSSSAR.V<br>R.YGGESDGVADK.L<br>R.VDTVADQGEFAVR.G<br>R.QLATTIANGQR.I<br>K.LYVPVENLDVLSR.Y<br>R.TYVAPWDPVIR.E<br>R.AADGFLPLLADLAR.A<br>K.LLGLDLDLGGAGFQLASHDLDIR.G<br>R.LATLSLQAAAPR.R<br>R.FGLAQLYQLR.G<br>R.EALSPVITIDAPILIPEDYVFDLPLR.M<br>K.AENAGAAPPR.E<br>R.IREIAGELLATAAQR.A<br>R.GGQSFVTPR.I<br>R.GALVSFHGDQFANVPGLIAYVER.L<br>R.YEGLTSIPVGNISPHDCVALTAYGGDK.L<br>R.TIIASVSGGAR.E<br>R.SRDTQESAAPTGVSTSLDTNGNK.G<br>R.RGELLITVAAITQR.T<br>R.GGLLDFPAGETGLR.V<br>R.GAGNLVDEQSGHIR.E<br>R.FAALADYHNR.V<br>R.ELSVIQTPVDR.L<br>R.EIAGELLATAAQR.A<br>R.AYALTPDGGAITDTAEKR.L<br>R.AYALTPDGGAITDTAEK.R<br>K.NLGLVDEEQR.F<br>K.LLGEARQR.R<br>R.LGEIVATWQFLK.S<br>R.ALGLLVAEGIENER.Q<br>R.VSLNITAADLGDPEFAER.F<br>R.WHPPELGLLGGAPLVAAR.A<br>R.INNSAGTAAAGDAVLDEIGR.R<br>R.FLVPATPLALGAR.A<br>K.VDPPRLTELEQAMLSDPASAEHLAQR.A<br>R.SRPLTLDFDQGLDER.I<br>R.LAARPYLHPISGDIMTVSGER.H<br>R.HILPAINEISLLR.E<br>R.GTIGLMNFRVEGLDR.L<br>R.VAASPASGGDDVSPGHIFPLIAGPQVR.E<br>R.IDDLDAFIAR.H<br>R.GGDDIFALAAR.H<br>R.LGISLINPGADR.Q<br>R.EGVGTGISAADR.A<br>K.NALDYLEDLAGDARPYLDGR.A<br>R.GPHGPDGAR.L<br>R.FQLELVADQLVSGASFAAR.K<br>R.AADGILIAAPYHGTISGLVK.N<br>K.GAHVDVFGSYLALPHYR.G<br>R.AVGLIATAYGDQATMSTMQTLR.S<br>R.SAADGDGFVEENLWTGIGR.A<br>R.AYQAEIGIEAFILSGYHAQEAFLAR.H<br>K.LDEATSAIR.E<br>R.IJLGPNAAGTGR.L<br>R.HVLPHIAHAPLEL<br>R.AEEGGFNILLPSGYQLGDDTVFAAAVATEVR.M<br>R.AEEGGFNILLPSGYQLGDDTVFAAAVATEVR.R<br>R.TLLNGEALHDGEPYQLK.L<br>R.LLWNISSDMPGQQLAGPGR.Y<br>K.LVATQPEISPLR.I<br>R.SLGVSNFTIAQTDALNGLGSK.L<br>R.VAAQNVSR.E<br>R.SEWYDVLVAAR.G<br>R.EIAYSWLMHPAGIVPIVGSQR.A<br>K.GGIRPLPYDQSPVEIEAHASLR.R<br>R.AMAGLPLAWSPLGGGR.L<br>R.PLGNMGMSVSIWGMWR.F<br>R.IDLWQHRPDLAHPQEVAR.T<br>R.LLQAPVDVADPGVDQVR.G<br>R.GIELPSELVAGFDDITLSR.T<br>R.FINHNLYTQR.D<br>R.YTWDDLSTHIR.A<br>R.FNPNLTNAPDAR.D<br>R.EGDFLPAIVGTAEHLDDGLVK.T<br>K.VPIAITAVSGDRLEATGTTSEGITR.L<br>K.SEGFEADLTAVPVDGLTLR.G<br>K.NASAGLVNIVSK.G<br>K.GPARNVFNHTATPNAVPIDEETSDAFEGLK.S<br>R.GPQGTFLGKNASAGLVNIVSK.G<br>R.FNDLIALTGLLR.Y<br>R.ASVAGPLGGDWSGR.V<br>R.APGVNSTGLPATPGISGNPAGGTVASGGTGLNTSSGSSNGNLSGK.A<br>R.AIVGTAEHLDDGLVK.T<br>K.VEENQK.V<br>K.TQQFSVEAR.I<br>K.GTTANSIVMR.G<br>K.GGTDQLEAEAK.A<br>R.IAFGGGSPNIAIPVELR.L<br>R.YGIVEWAGNDLVRDDGLPYAR.H<br>R.YGIVEWAGNDLVR.D<br>R.VSLGVQTFAPHVQAIQR.I<br>R.TSVGPAQSAVR.A<br>R.NFQGFTEMAPVLLGFGASISR.F<br>R.HVAAQFDSAR.G<br>R.IFVEEEERAR<br>K.GQFDLDGALR.I<br>R.LAADGVVAGESR.F<br>R.VHAGTLNLDAPIR.V<br>R.VAAGADTAIADIAR.L<br>R.FDLSLLTGESAPVAAQVDDR.V<br>R.VWDATALEPMEMLVAAGER.L<br>R.LAEVDLALVDK.T<br>R.GDSIIQDFPSCSQ<br>R.TVSLTLAPDSVTR.V<br>R.LFIAAPGTGPAPR.Q<br>K.GLVPATGGQTDGQR.<br>R.ASLTASVNPQR.N<br>R.DGILDAQVADVSHVR.T<br>R.APMSALATPLAALPGKPELMQAQVAGGSASFR.V<br>K.RIDEATGR.T<br>K.LTDAIWLGGDR.A<br>K.MLSAVYSLGGGEK.G |
| YP_616697 | Sala_1651 | DEAD/DEAH box helicase-like protein               | 9.84%             | 5                       |                                                                                                                                                                                                                                                                                                                                                                                                                                                                                                                                                                                                                                                                                                                                                                                                                                                                                                                                                                                                                                                                                                                                                                                                                                                                                                                                                                                                                                                                                                                                                                                                                                                                                                                                                                                                                                                                                                                                                                                                                                                                                                                                                                                                                                                                                                                                                                                                                                                                                                                                                                                                                                                                                                                                                                                                                                                                                                                                                           |
| YP_616699 | Sala_1653 | transcription-repair coupling factor              | 34.92%            | 29                      |                                                                                                                                                                                                                                                                                                                                                                                                                                                                                                                                                                                                                                                                                                                                                                                                                                                                                                                                                                                                                                                                                                                                                                                                                                                                                                                                                                                                                                                                                                                                                                                                                                                                                                                                                                                                                                                                                                                                                                                                                                                                                                                                                                                                                                                                                                                                                                                                                                                                                                                                                                                                                                                                                                                                                                                                                                                                                                                                                           |
| YP_616700 | Sala_1654 | diguanylate cyclase/phosphodiesterase             | 32.66%            | 7                       |                                                                                                                                                                                                                                                                                                                                                                                                                                                                                                                                                                                                                                                                                                                                                                                                                                                                                                                                                                                                                                                                                                                                                                                                                                                                                                                                                                                                                                                                                                                                                                                                                                                                                                                                                                                                                                                                                                                                                                                                                                                                                                                                                                                                                                                                                                                                                                                                                                                                                                                                                                                                                                                                                                                                                                                                                                                                                                                                                           |
| YP_616702 | Sala_1656 | NAD(+) kinase                                     | 27.73%            | 4                       |                                                                                                                                                                                                                                                                                                                                                                                                                                                                                                                                                                                                                                                                                                                                                                                                                                                                                                                                                                                                                                                                                                                                                                                                                                                                                                                                                                                                                                                                                                                                                                                                                                                                                                                                                                                                                                                                                                                                                                                                                                                                                                                                                                                                                                                                                                                                                                                                                                                                                                                                                                                                                                                                                                                                                                                                                                                                                                                                                           |
| YP_616703 | Sala_1657 | 3,4-dihydroxy-2-butanone 4-phosphate synthase     | 37.37%            | 5                       |                                                                                                                                                                                                                                                                                                                                                                                                                                                                                                                                                                                                                                                                                                                                                                                                                                                                                                                                                                                                                                                                                                                                                                                                                                                                                                                                                                                                                                                                                                                                                                                                                                                                                                                                                                                                                                                                                                                                                                                                                                                                                                                                                                                                                                                                                                                                                                                                                                                                                                                                                                                                                                                                                                                                                                                                                                                                                                                                                           |
| YP_616704 | Sala_1658 | NADPH-dependent FMN reductase                     | 59.69%            | 6                       |                                                                                                                                                                                                                                                                                                                                                                                                                                                                                                                                                                                                                                                                                                                                                                                                                                                                                                                                                                                                                                                                                                                                                                                                                                                                                                                                                                                                                                                                                                                                                                                                                                                                                                                                                                                                                                                                                                                                                                                                                                                                                                                                                                                                                                                                                                                                                                                                                                                                                                                                                                                                                                                                                                                                                                                                                                                                                                                                                           |
| YP_616706 | Sala_1660 | Alkanesulfonate monooxygenase                     | 41.99%            | 9                       |                                                                                                                                                                                                                                                                                                                                                                                                                                                                                                                                                                                                                                                                                                                                                                                                                                                                                                                                                                                                                                                                                                                                                                                                                                                                                                                                                                                                                                                                                                                                                                                                                                                                                                                                                                                                                                                                                                                                                                                                                                                                                                                                                                                                                                                                                                                                                                                                                                                                                                                                                                                                                                                                                                                                                                                                                                                                                                                                                           |
| YP_616707 | Sala_1661 | aldo/keto reductase                               | 51.97%            | 9                       |                                                                                                                                                                                                                                                                                                                                                                                                                                                                                                                                                                                                                                                                                                                                                                                                                                                                                                                                                                                                                                                                                                                                                                                                                                                                                                                                                                                                                                                                                                                                                                                                                                                                                                                                                                                                                                                                                                                                                                                                                                                                                                                                                                                                                                                                                                                                                                                                                                                                                                                                                                                                                                                                                                                                                                                                                                                                                                                                                           |
| YP_616708 | Sala_1662 | transcriptional regulator, LacI family            | 11.28%            | 2                       |                                                                                                                                                                                                                                                                                                                                                                                                                                                                                                                                                                                                                                                                                                                                                                                                                                                                                                                                                                                                                                                                                                                                                                                                                                                                                                                                                                                                                                                                                                                                                                                                                                                                                                                                                                                                                                                                                                                                                                                                                                                                                                                                                                                                                                                                                                                                                                                                                                                                                                                                                                                                                                                                                                                                                                                                                                                                                                                                                           |
| YP_616710 | Sala_1664 | TonB-dependent receptor                           | 33.75%            | 17                      |                                                                                                                                                                                                                                                                                                                                                                                                                                                                                                                                                                                                                                                                                                                                                                                                                                                                                                                                                                                                                                                                                                                                                                                                                                                                                                                                                                                                                                                                                                                                                                                                                                                                                                                                                                                                                                                                                                                                                                                                                                                                                                                                                                                                                                                                                                                                                                                                                                                                                                                                                                                                                                                                                                                                                                                                                                                                                                                                                           |
| YP_616714 | Sala_1668 | oxygen-independent coproporphyrinogen III oxidase | 23.57%            | 7                       |                                                                                                                                                                                                                                                                                                                                                                                                                                                                                                                                                                                                                                                                                                                                                                                                                                                                                                                                                                                                                                                                                                                                                                                                                                                                                                                                                                                                                                                                                                                                                                                                                                                                                                                                                                                                                                                                                                                                                                                                                                                                                                                                                                                                                                                                                                                                                                                                                                                                                                                                                                                                                                                                                                                                                                                                                                                                                                                                                           |
| YP_616715 | Sala_1669 | cytochrome oxidase maturation protein, cbb3-type  | 45.10%            | 2                       |                                                                                                                                                                                                                                                                                                                                                                                                                                                                                                                                                                                                                                                                                                                                                                                                                                                                                                                                                                                                                                                                                                                                                                                                                                                                                                                                                                                                                                                                                                                                                                                                                                                                                                                                                                                                                                                                                                                                                                                                                                                                                                                                                                                                                                                                                                                                                                                                                                                                                                                                                                                                                                                                                                                                                                                                                                                                                                                                                           |
| YP_616716 | Sala_1670 | Heavy metal translocating P-type ATPase           | 14.20%            | 6                       |                                                                                                                                                                                                                                                                                                                                                                                                                                                                                                                                                                                                                                                                                                                                                                                                                                                                                                                                                                                                                                                                                                                                                                                                                                                                                                                                                                                                                                                                                                                                                                                                                                                                                                                                                                                                                                                                                                                                                                                                                                                                                                                                                                                                                                                                                                                                                                                                                                                                                                                                                                                                                                                                                                                                                                                                                                                                                                                                                           |
| YP_616718 | Sala_1672 | 4Fe-4S ferredoxin, iron-sulfur binding            | 8.25%             | 3                       |                                                                                                                                                                                                                                                                                                                                                                                                                                                                                                                                                                                                                                                                                                                                                                                                                                                                                                                                                                                                                                                                                                                                                                                                                                                                                                                                                                                                                                                                                                                                                                                                                                                                                                                                                                                                                                                                                                                                                                                                                                                                                                                                                                                                                                                                                                                                                                                                                                                                                                                                                                                                                                                                                                                                                                                                                                                                                                                                                           |
| YP_616719 | Sala_1673 | cytochrome c oxidase, cbb3-type, subunit III      | 51.47%            | 10                      |                                                                                                                                                                                                                                                                                                                                                                                                                                                                                                                                                                                                                                                                                                                                                                                                                                                                                                                                                                                                                                                                                                                                                                                                                                                                                                                                                                                                                                                                                                                                                                                                                                                                                                                                                                                                                                                                                                                                                                                                                                                                                                                                                                                                                                                                                                                                                                                                                                                                                                                                                                                                                                                                                                                                                                                                                                                                                                                                                           |



| Accession | Locus tag | Description                                | Sequence coverage | No. peptides identified | List of peptides identified                                                                                                                                                                                                                                                                                                                                                                                                                                                                                                                                                                                                                                                                                                                                                                                                                                                                                                                                                                                                                                                                                                                                                                                                                                                                                                                                                                                                                                                                                                                                                                                                                                                                                                                                                                                                                                                                                                                                                                                                                                                                                                                                                                                                                                                                                                                                                                                                                                                                                                                                                                                                                                                                                                                                                                                                                                                                                                                                                                                                                                                                                                                                                                                                                                                                                                                   |
|-----------|-----------|--------------------------------------------|-------------------|-------------------------|-----------------------------------------------------------------------------------------------------------------------------------------------------------------------------------------------------------------------------------------------------------------------------------------------------------------------------------------------------------------------------------------------------------------------------------------------------------------------------------------------------------------------------------------------------------------------------------------------------------------------------------------------------------------------------------------------------------------------------------------------------------------------------------------------------------------------------------------------------------------------------------------------------------------------------------------------------------------------------------------------------------------------------------------------------------------------------------------------------------------------------------------------------------------------------------------------------------------------------------------------------------------------------------------------------------------------------------------------------------------------------------------------------------------------------------------------------------------------------------------------------------------------------------------------------------------------------------------------------------------------------------------------------------------------------------------------------------------------------------------------------------------------------------------------------------------------------------------------------------------------------------------------------------------------------------------------------------------------------------------------------------------------------------------------------------------------------------------------------------------------------------------------------------------------------------------------------------------------------------------------------------------------------------------------------------------------------------------------------------------------------------------------------------------------------------------------------------------------------------------------------------------------------------------------------------------------------------------------------------------------------------------------------------------------------------------------------------------------------------------------------------------------------------------------------------------------------------------------------------------------------------------------------------------------------------------------------------------------------------------------------------------------------------------------------------------------------------------------------------------------------------------------------------------------------------------------------------------------------------------------------------------------------------------------------------------------------------------------|
| YP_616753 | Sala_1707 | DNA replication and repair protein RecF    | 15.72%            | 2                       | R.LKLLADAGLVLPNAGK.S<br>K.GGDIIVEAVAGNLTIDFR.Y<br>R.LDITLAALSALAGQPDAPPARPLTLVDSEGAER.S<br>R.NHAGADLAAAPGLVALHGDNSAGK.T<br>K.LLAAPINPSDLGLLFGADMSTAR.A<br>R.VVDELITTFK.S<br>R.SDAQVALLK.G<br>K.SHYSHEISLTDALDVEAQAYNAKR.T<br>K.LAGQILTAMEAAVAVR.R<br>R.RIEGDIWASALNR.D<br>R.LPQDAQITITALLGADGAHAPTR.T<br>R.QQVSNPPWAAVAVR.L<br>K.GLTLEEAQR.C<br>R.IAALDVAELVLR.L<br>R.LLNVGKELHLLPLGAGLR.Q<br>R.TPGALAEAVQELAAAPSPDVAASLDGR.F<br>R.DREFDVIDAQFFYPDGPAAVR.V<br>K.VGALIGEATTQQFGSK.A<br>R.TALPEGDKAAER.A<br>R.LVAGIADAFPTAK.T<br>R.TTAVTEGAER.V<br>K.TGSEVTVSGK.V<br>R.GLNLVDVFGGQSVR.V<br>K.VGPHSFVPR.T<br>K.VGALIGEATTQQFGSKAVSIR.T<br>R.LFSETQAGLTGQR.D<br>R.GQSGPDDIAGELSTTGR.I<br>R.DWNIDVVDSTR.I<br>K.AFESLPGFAQAK.V<br>R.VFQAVELGYSEASR.A<br>R.IVQVPLQDPAALK.E<br>R.VPVSSEIVPYAEGEGNAFEVLR.R<br>R.MVDANADPAEAAAGR.V<br>R.VPVSSEIVPYAEGEGNAFEVLR.R<br>R.TVTPELGADSR.K<br>R.RVFQAVELGYSEASR.A<br>R.MVDANADPAEAAAGR.V<br>R.IVQVPLQDPAALKELIGK.T<br>R.IVMSPTSAGQTQAVANAMDTAR.D<br>R.FDSAGSFTAK.V<br>R.WALGTRTEPTIR.E<br>R.TVTPELGADSR.K<br>R.ERLSETQAGLTGQR.D<br>K.ATLADVLQPGGKPAKD.<br>R.DQVVTGGGIVGK.V<br>R.VDDYADVEIAQGVK.V<br>K.VTRVDDYADVEIAQGVK.V<br>K.IAAVKPR.D<br>R.LYAPDAVIDGAPGR.E<br>K.ALTGGQADVIDVPGGDFIDESTR.C<br>R.LIAAPLVDVFAAFTSADTLAR.W<br>K.DHVAQLNSSLANLAR.V<br>R.LRLTFDDPEVETK.S<br>R.VAAVLQGVHDNYDITDFK.A<br>K.IVSESAVSSGVR.R<br>R.RIEALTGEAR.Q<br>K.HNDLDNVGYTAR.H<br>K.ALTAAEIAIDIEADVNAQIR.G<br>K.LVDYTGFPYDLTEDALR.S<br>R.ASSLVADGVLPSNEGR.G<br>K.RPYSTAASSQK.C<br>K.ASVSDTGKPLGR.L<br>R.LLPSLTAEMGAAYPELIR.A<br>K.ALALGGSGDGGAAAGPAVEQGVDAFLAQVVDGLDPK.E<br>R.VAQLAEQLK.K<br>R.LMTPDDAIAAGALALFGEK.Y<br>R.LGGHVTQK.G<br>R.ANHSATHLHAALR.N<br>R.ALGDIALFK.I<br>R.AQPLIAETLREEVK.F<br>R.GDVLGQVAFK.L<br>R.VAQLEQLK.A<br>R.AGFDAAMAQQK.A<br>K.AAVVALGGQGGGRPDMAQGGGPNNGAANDAVAAVK.A<br>R.ASVAVGVTDDKTHHSVAVDLVK.A<br>K.VGDTVQLTVAER.R<br>K.QVSSGVAMLVAVNDGR.A<br>K.EQAIHAWTLITQTWGLAPEK.L<br>R.VDLRPSDITGMGLER.V<br>R.LLDEATADMGR.G<br>R.IEALTGEAR.Q<br>R.AQPLIAETLER.E<br>K.LTATVYHTDDEADLWK.K<br>R.VDLRPSDITGMGLER.V<br>R.QWLNDRDEALK.A<br>R.LLPSLTAEMGAAYPELIR.A<br>R.HAHLGAK.D<br>R.GGPPGSPPEEDGR.F<br>R.AGFDAAMAQQK.A<br>R.AGDEVIVLNTQTFYGESGGQMGDAGMIATLEGAK.A<br>K.LTATVYHTDDEADLWK.K<br>K.ADDRNYSVELCGGTHVR.A<br>K.AAVVALGGQGGGRPDMAQGGGPNNGAANDAVAAVK.A<br>R.NYSVELCGGTHVR.A<br>R.LMTPDDAIAAGALALFGEK.Y<br>R.FRFDFSHPK.A<br>R.ELADAKK.A<br>R.DGQPVVEAR.A<br>R.ASVAVGVTDDK.T<br>K.KALALGGSGDGGAAAGPAVEQGVDAFLAQVVDGLDPK.E<br>R.LSFQAANPR.L<br>R.TDTSEVPPELIEEGVPK.A<br>R.LGSAAPLEPR.I<br>R.IJLWLEEGAPYEIR.F<br>R.FYDRDPVNLAPPVAVHPLGK.S<br>R.INQQLDAHFSYMESR.I<br>R.GTDDHVSHLEWLHFAEGSAMPILLR.I<br>R.AKGGAYGY.<br>R.HGGSHLPER.G<br>K.SPVLEDGGR.V<br>R.VVIESGATTEYLCEH.H<br>R.INQQLDAHFSYMESR.I<br>R.GTDDHVSHLEWLHFAEGSAMPILLR.I<br>K.LAAFVNACHAR.F<br>R.SNAIDLVDVSAALVPR.A<br>K.IGGTAAFVDAEHALDPVYAR.K<br>K.ALDAALQIDR.A<br>K.IGVYGNPETTTGGNALK.F<br>R.KLGVDELIVSQPDTGEQALEIVDTLVR.S<br>K.NGDEIVGNTR.V<br>R.VIEYGPSSGK.T<br>K.IGELDVGK.A<br>K.SGAWFSYSIR.I<br>K.TFLKENPELMGR.L<br>K.LGVDELIVSQPDTGEQALEIVDTLVR.S<br>R.GRVIEYGPSSGK.T<br>R.GRTDVAEENHAGPDDVGGDAI.<br>R.AEIEGEMGDSHVGLQAR.L<br>K.QVEFDIMYQGIS.I<br>R.ADPGQLEQVIINLAVNAR.D<br>R.VAGDAPAAPQPAKPK.K<br>R.HTPGDSYDDIQIR.S<br>R.FDLVAELR.H<br>R.AGTVYVTAQEGEGLER.F<br>R.TGQAEYLVWR.F<br>R.RPGLVLFMSYAEELQR.Q<br>R.QSIDIDNVFLPKPFSVAQLAEATSAALEAAHR.G |
| YP_616755 | Sala_1709 | Alcohol dehydrogenase GroES-like protein   | 21.90%            | 6                       |                                                                                                                                                                                                                                                                                                                                                                                                                                                                                                                                                                                                                                                                                                                                                                                                                                                                                                                                                                                                                                                                                                                                                                                                                                                                                                                                                                                                                                                                                                                                                                                                                                                                                                                                                                                                                                                                                                                                                                                                                                                                                                                                                                                                                                                                                                                                                                                                                                                                                                                                                                                                                                                                                                                                                                                                                                                                                                                                                                                                                                                                                                                                                                                                                                                                                                                                               |
| YP_616757 | Sala_1711 | transcriptional regulator, XRE family      | 50.00%            | 6                       |                                                                                                                                                                                                                                                                                                                                                                                                                                                                                                                                                                                                                                                                                                                                                                                                                                                                                                                                                                                                                                                                                                                                                                                                                                                                                                                                                                                                                                                                                                                                                                                                                                                                                                                                                                                                                                                                                                                                                                                                                                                                                                                                                                                                                                                                                                                                                                                                                                                                                                                                                                                                                                                                                                                                                                                                                                                                                                                                                                                                                                                                                                                                                                                                                                                                                                                                               |
| YP_616758 | Sala_1712 | glycosyl transferase, group 1              | 12.89%            | 2                       |                                                                                                                                                                                                                                                                                                                                                                                                                                                                                                                                                                                                                                                                                                                                                                                                                                                                                                                                                                                                                                                                                                                                                                                                                                                                                                                                                                                                                                                                                                                                                                                                                                                                                                                                                                                                                                                                                                                                                                                                                                                                                                                                                                                                                                                                                                                                                                                                                                                                                                                                                                                                                                                                                                                                                                                                                                                                                                                                                                                                                                                                                                                                                                                                                                                                                                                                               |
| YP_616759 | Sala_1713 | SecF protein                               | 28.44%            | 8                       |                                                                                                                                                                                                                                                                                                                                                                                                                                                                                                                                                                                                                                                                                                                                                                                                                                                                                                                                                                                                                                                                                                                                                                                                                                                                                                                                                                                                                                                                                                                                                                                                                                                                                                                                                                                                                                                                                                                                                                                                                                                                                                                                                                                                                                                                                                                                                                                                                                                                                                                                                                                                                                                                                                                                                                                                                                                                                                                                                                                                                                                                                                                                                                                                                                                                                                                                               |
| YP_616760 | Sala_1714 | protein-export membrane protein SecD       | 35.94%            | 18                      |                                                                                                                                                                                                                                                                                                                                                                                                                                                                                                                                                                                                                                                                                                                                                                                                                                                                                                                                                                                                                                                                                                                                                                                                                                                                                                                                                                                                                                                                                                                                                                                                                                                                                                                                                                                                                                                                                                                                                                                                                                                                                                                                                                                                                                                                                                                                                                                                                                                                                                                                                                                                                                                                                                                                                                                                                                                                                                                                                                                                                                                                                                                                                                                                                                                                                                                                               |
| YP_616761 | Sala_1715 | preprotein translocase, YajC subunit       | 29.78%            | 5                       |                                                                                                                                                                                                                                                                                                                                                                                                                                                                                                                                                                                                                                                                                                                                                                                                                                                                                                                                                                                                                                                                                                                                                                                                                                                                                                                                                                                                                                                                                                                                                                                                                                                                                                                                                                                                                                                                                                                                                                                                                                                                                                                                                                                                                                                                                                                                                                                                                                                                                                                                                                                                                                                                                                                                                                                                                                                                                                                                                                                                                                                                                                                                                                                                                                                                                                                                               |
| YP_616762 | Sala_1716 | Alcohol dehydrogenase, zinc-binding        | 12.31%            | 2                       |                                                                                                                                                                                                                                                                                                                                                                                                                                                                                                                                                                                                                                                                                                                                                                                                                                                                                                                                                                                                                                                                                                                                                                                                                                                                                                                                                                                                                                                                                                                                                                                                                                                                                                                                                                                                                                                                                                                                                                                                                                                                                                                                                                                                                                                                                                                                                                                                                                                                                                                                                                                                                                                                                                                                                                                                                                                                                                                                                                                                                                                                                                                                                                                                                                                                                                                                               |
| YP_616765 | Sala_1719 | hypothetical protein                       | 30.43%            | 3                       |                                                                                                                                                                                                                                                                                                                                                                                                                                                                                                                                                                                                                                                                                                                                                                                                                                                                                                                                                                                                                                                                                                                                                                                                                                                                                                                                                                                                                                                                                                                                                                                                                                                                                                                                                                                                                                                                                                                                                                                                                                                                                                                                                                                                                                                                                                                                                                                                                                                                                                                                                                                                                                                                                                                                                                                                                                                                                                                                                                                                                                                                                                                                                                                                                                                                                                                                               |
| YP_616766 | Sala_1720 | alanyl-tRNA synthetase                     | 61.65%            | 47                      |                                                                                                                                                                                                                                                                                                                                                                                                                                                                                                                                                                                                                                                                                                                                                                                                                                                                                                                                                                                                                                                                                                                                                                                                                                                                                                                                                                                                                                                                                                                                                                                                                                                                                                                                                                                                                                                                                                                                                                                                                                                                                                                                                                                                                                                                                                                                                                                                                                                                                                                                                                                                                                                                                                                                                                                                                                                                                                                                                                                                                                                                                                                                                                                                                                                                                                                                               |
| YP_616767 | Sala_1721 | hypothetical protein                       | 13.61%            | 2                       |                                                                                                                                                                                                                                                                                                                                                                                                                                                                                                                                                                                                                                                                                                                                                                                                                                                                                                                                                                                                                                                                                                                                                                                                                                                                                                                                                                                                                                                                                                                                                                                                                                                                                                                                                                                                                                                                                                                                                                                                                                                                                                                                                                                                                                                                                                                                                                                                                                                                                                                                                                                                                                                                                                                                                                                                                                                                                                                                                                                                                                                                                                                                                                                                                                                                                                                                               |
| YP_616768 | Sala_1722 | glutathione S-transferase-like protein     | 69.23%            | 12                      |                                                                                                                                                                                                                                                                                                                                                                                                                                                                                                                                                                                                                                                                                                                                                                                                                                                                                                                                                                                                                                                                                                                                                                                                                                                                                                                                                                                                                                                                                                                                                                                                                                                                                                                                                                                                                                                                                                                                                                                                                                                                                                                                                                                                                                                                                                                                                                                                                                                                                                                                                                                                                                                                                                                                                                                                                                                                                                                                                                                                                                                                                                                                                                                                                                                                                                                                               |
| YP_616771 | Sala_1725 | recA protein                               | 57.78%            | 15                      |                                                                                                                                                                                                                                                                                                                                                                                                                                                                                                                                                                                                                                                                                                                                                                                                                                                                                                                                                                                                                                                                                                                                                                                                                                                                                                                                                                                                                                                                                                                                                                                                                                                                                                                                                                                                                                                                                                                                                                                                                                                                                                                                                                                                                                                                                                                                                                                                                                                                                                                                                                                                                                                                                                                                                                                                                                                                                                                                                                                                                                                                                                                                                                                                                                                                                                                                               |
| YP_616773 | Sala_1727 | periplasmic sensor hybrid histidine kinase | 24.72%            | 13                      |                                                                                                                                                                                                                                                                                                                                                                                                                                                                                                                                                                                                                                                                                                                                                                                                                                                                                                                                                                                                                                                                                                                                                                                                                                                                                                                                                                                                                                                                                                                                                                                                                                                                                                                                                                                                                                                                                                                                                                                                                                                                                                                                                                                                                                                                                                                                                                                                                                                                                                                                                                                                                                                                                                                                                                                                                                                                                                                                                                                                                                                                                                                                                                                                                                                                                                                                               |

| Accession | Locus tag | Description                                                         | Sequence coverage | No. peptides identified | List of peptides identified                                                                                                                                                                                                                                                                                                                                                                                                                                                                                                                                                                                                                                                                                                                                                                                                                                                                                                                                                                                                                                                                                                                                                                                                                                                                                                                                                                                                                                                                                                                                                                                                                                                                                                                                                                                                                                                                                                                                                                                                                                                                                                                                                                                                                                                                                                                                                                                                                                                                                                                                                                                                                                                                                                                                                                                                                                                                                                                                                                                                                                                                                                                                                  |
|-----------|-----------|---------------------------------------------------------------------|-------------------|-------------------------|------------------------------------------------------------------------------------------------------------------------------------------------------------------------------------------------------------------------------------------------------------------------------------------------------------------------------------------------------------------------------------------------------------------------------------------------------------------------------------------------------------------------------------------------------------------------------------------------------------------------------------------------------------------------------------------------------------------------------------------------------------------------------------------------------------------------------------------------------------------------------------------------------------------------------------------------------------------------------------------------------------------------------------------------------------------------------------------------------------------------------------------------------------------------------------------------------------------------------------------------------------------------------------------------------------------------------------------------------------------------------------------------------------------------------------------------------------------------------------------------------------------------------------------------------------------------------------------------------------------------------------------------------------------------------------------------------------------------------------------------------------------------------------------------------------------------------------------------------------------------------------------------------------------------------------------------------------------------------------------------------------------------------------------------------------------------------------------------------------------------------------------------------------------------------------------------------------------------------------------------------------------------------------------------------------------------------------------------------------------------------------------------------------------------------------------------------------------------------------------------------------------------------------------------------------------------------------------------------------------------------------------------------------------------------------------------------------------------------------------------------------------------------------------------------------------------------------------------------------------------------------------------------------------------------------------------------------------------------------------------------------------------------------------------------------------------------------------------------------------------------------------------------------------------------|
| YP_616774 | Sala_1728 | Endothelin-converting enzyme 1                                      | 62.24%            | 39                      | R.LAGQSGDPVSMR.V<br>R.IDDGGALYFAR.E<br>R.GLGEAAVLLSK.D<br>R.AANEAFLLR.A<br>K.GTGLGLSTVYGIK.Q<br>K.AFQVQPKQTLYLAPER.V<br>R.GIGVNEESLLVQPSAFTGEAK.L<br>K.LADWWTADVAFAEAGK.A<br>K.GLSPIEPWLNQIR.S<br>R.SVQFAHDDNISR.L<br>R.SLDGFSVLPDAIAR.E<br>K.LIADAPIGVIR.D<br>R.ITDPHSPSIQR.T<br>K.SVQPGDDFYAYANGSWAR.N<br>K.MTIAELAAAAPGDFWATFLR.G<br>R.AYSFALDAATVEAK.G<br>K.SNFGMFTVLADLSQSR.T<br>K.EAPVIDGLTGDQR.F<br>K.ADDLFGNALR.S<br>K.QIATVHWKNDSSDATK.V<br>R.AVDFTTNMGEAVGQDYVAK.Y<br>R.WYREGNLSQR.I<br>R.FFLGWAQVWR.R<br>K.HLENVLTAGEANAAAR.A<br>R.EAFAYGTALSGTPQMQR.W<br>K.ALIAQYDAYEVLPEK.L<br>R.TQEILEAAK.A<br>R.NTPIPADKSNFGMFTVLADLSQSR.T<br>K.YDETGLADWWTPADVAFAEAGK.A<br>R.IDGLSWMPETK.V<br>K.LDGTFTLGENIGDLAGLVAYDAYK.K<br>K.LDGTFTLGENIGDLAGLVAYDAYK.K<br>R.AVDFTTNMGEAVGQDYVAK.Y<br>K.MTIAELAAAAPGDFWATFLR.G<br>K.LEIKADLFGNALR.S<br>K.AYDFEK.Q<br>R.SVDKAGLAK.L<br>R.GIGVNEESLLVQPSAFTGEAKLIADAPIGVIR.D<br>R.EQNLISQR.I<br>R.DPFLKDNEN.N<br>K.SNFGMFTVLADLSQSR.T<br>K.PGQTLYLAPER.V<br>K.NVLAAMGDR.I<br>K.AAMDQLK.N<br>R.NSPTREELLASR.F<br>R.DQRHEASTSDTAAG.<br>R.QGHTLVRLSYVFNRR.G<br>R.EINKLHAGVAR.Q<br>K.ALADASDLPIVVYVGR.T<br>R.DGAFDAPTFAR.L<br>R.AVVDAALASAGVI.<br>R.VHDWFSFEVRL.L<br>R.LPIPAASGAR.A<br>K.LAEIPTVAVK.D<br>R.VPVIAGCGSNDTATAIR.H<br>R.HAQASGADAALIVAPYRNRSQEGMIAHFK.A<br>K.DASGDLAR.V<br>R.PAPNPTIEVSADEQR.A<br>R.IANSGASDFQLSR.F<br>R.VLENAVYDTR.D<br>K.AIALDSFDPAR.T<br>R.SLAQAPTDAAEWLETLTNR.L<br>R.RQEHAHAVR.R<br>R.APLSFYLGK.R<br>R.VYGGSYPLVAAVYAGPWNWK.W<br>R.TGADILDWIEAIPFETR.N<br>R.SGAVDAALQASAVESANSIVR.T<br>R.LAESSGDKLSAFNIAR.Q<br>K.ASTPADHVLGK.L<br>R.VPAGHEGNWTFIHATR.Q<br>R.VLGMFPALTLADHDAR.M<br>R.SAQANSLDAVEVSGFPTVR.V<br>R.QLDDAFPPGTVIR.E<br>R.ETPLVRRDYSLAWLAGQLAFR.D<br>R.DAANAHFADAAQHYDQFYGLALER.L<br>R.AWTSGLDDYETSR.V<br>R.ALGEIGAWR.E<br>R.AALAAGDRDAANAHFADAAQHYDQFYGLALER.L<br>R.AAISHAGAR.G<br>R.SENGDIYGR.K<br>R.VTTLVGDDEAEAGSGR.I<br>R.AEYDALLGDER.P<br>K.TNISPAGFAALR.A<br>R.SQALYEAEEK.G<br>R.LIGEDPELTIADVLSR.H<br>K.GRPALDFAPVGSPPFAAVK.E<br>K.LTLDPLWTDAGLLALER.F<br>R.AILLALLPQPEGN.<br>R.GNVVGHSDIAPTR.K<br>R.KDQDPEFPVEELAR.R<br>K.TGAEDRLADPDAR.V<br>R.VPLPLDLSVMTGVDIVLAR.N<br>R.AAGQYFAIR.G<br>R.AADAALVSGVLAVDR.L<br>R.ETPTSLVGLVLR.A<br>R.TAPAVLVQAVR.Q<br>R.LAFGSAGGFCELVPEEAK.S<br>R.IFLDIVER.I<br>K.SAIEIIGDR.A<br>R.ILAEGEAASPMSR.T<br>R.LCHDLLSPVGFANGELLELADEKPEMR.A<br>R.ILAEGEAASPMSR.T<br>R.CIELLEQSR.T<br>R.IDKDTSGLIVAAK.H<br>R.ALAEALPNSR.E<br>R.VVDHAGAILWDPAK.A<br>R.QALHAAHLGFHPVTGNR.I<br>R.GYGLPVSELISEGNIGLMQGVK.K<br>K.SNPPAVVWALGGESLNR.Y<br>K.TLEDLSQLYDVS.R<br>R.ASIQEFILR.S<br>R.FQEHGDNEAAQLVTSHLR.L<br>R.HDLLTEALETLNERER.H<br>R.HDLLTEALETLNER.E<br>R.DVRRDLTEALETLNER.E<br>K.NNLEAFEDGDLSPHVAK.I<br>R.KFPLTPEQYMLAK.R<br>R.KRFQEHGDNEAAQLVTSHLR.L<br>R.LATYAMWVIR.A<br>R.MKNNLEAFEDGDLSPHVAK.I<br>R.LTDPKTELEDLSQLYDVS.R.E<br>K.LATDLVTEDEVSMNR.R<br>R.SLATADAADAK.S<br>K.ASEIEAATDKK.D<br>K.IAEATGGLAFGNVTMGR.A<br>K.ASEIEAATDKK.K<br>K.DGDPGGERPKA.<br>R.AQHYAWGGAGDGRS.S<br>R.GWDYFAGLSAEDAAR.A<br>R.AAEEAQGAR.S<br>R.FAAGQAFAVELK.Q<br>R.ALEILGLDPDAFDATK.K<br>R.YDGYAALAAALDER.L<br>R.LQAHHVIAQR.S<br>K.LFVHTQEEQDKR.F<br>R.YFEWPIGAPTEEK.A<br>R.SVIMVEGWDAAGK.G |
| YP_616775 | Sala_1729 | hypothetical protein                                                | 11.76%            | 2                       | R.NSPTREELLASR.F                                                                                                                                                                                                                                                                                                                                                                                                                                                                                                                                                                                                                                                                                                                                                                                                                                                                                                                                                                                                                                                                                                                                                                                                                                                                                                                                                                                                                                                                                                                                                                                                                                                                                                                                                                                                                                                                                                                                                                                                                                                                                                                                                                                                                                                                                                                                                                                                                                                                                                                                                                                                                                                                                                                                                                                                                                                                                                                                                                                                                                                                                                                                                             |
| YP_616776 | Sala_1730 | SsrA-binding protein                                                | 16.15%            | 2                       | R.DQRHEASTSDTAAG.<br>R.QGHTLVRLSYVFNRR.G                                                                                                                                                                                                                                                                                                                                                                                                                                                                                                                                                                                                                                                                                                                                                                                                                                                                                                                                                                                                                                                                                                                                                                                                                                                                                                                                                                                                                                                                                                                                                                                                                                                                                                                                                                                                                                                                                                                                                                                                                                                                                                                                                                                                                                                                                                                                                                                                                                                                                                                                                                                                                                                                                                                                                                                                                                                                                                                                                                                                                                                                                                                                     |
| YP_616777 | Sala_1731 | dihydrodipicolinate synthase                                        | 44.33%            | 9                       | R.EINKLHAGVAR.Q<br>K.ALADASDLPIVVYVGR.T<br>R.DGAFDAPTFAR.L<br>R.AVVDAALASAGVI.<br>R.VHDWFSFEVRL.L<br>R.LPIPAASGAR.A<br>K.LAEIPTVAVK.D<br>R.VPVIAGCGSNDTATAIR.H<br>R.HAQASGADAALIVAPYRNRSQEGMIAHFK.A<br>K.DASGDLAR.V<br>R.PAPNPTIEVSADEQR.A<br>R.IANSGASDFQLSR.F<br>R.VLENAVYDTR.D<br>K.AIALDSFDPAR.T<br>R.SLAQAPTDAAEWLETLTNR.L<br>R.RQEHAHAVR.R<br>R.APLSFYLGK.R<br>R.VYGGSYPLVAAVYAGPWNWK.W<br>R.TGADILDWIEAIPFETR.N<br>R.SGAVDAALQASAVESANSIVR.T<br>R.LAESSGDKLSAFNIAR.Q<br>K.ASTPADHVLGK.L<br>R.VPAGHEGNWTFIHATR.Q<br>R.VLGMFPALTLADHDAR.M<br>R.SAQANSLDAVEVSGFPTVR.V<br>R.QLDDAFPPGTVIR.E<br>R.ETPLVRRDYSLAWLAGQLAFR.D<br>R.DAANAHFADAAQHYDQFYGLALER.L<br>R.AWTSGLDDYETSR.V<br>R.ALGEIGAWR.E<br>R.AALAAGDRDAANAHFADAAQHYDQFYGLALER.L<br>R.AAISHAGAR.G<br>R.SENGDIYGR.K<br>R.VTTLVGDDEAEAGSGR.I<br>R.AEYDALLGDER.P<br>K.TNISPAGFAALR.A<br>R.SQALYEAEEK.G<br>R.LIGEDPELTIADVLSR.H<br>K.GRPALDFAPVGSPPFAAVK.E<br>K.LTLDPLWTDAGLLALER.F<br>R.AILLALLPQPEGN.<br>R.GNVVGHSDIAPTR.K<br>R.KDQDPEFPVEELAR.R<br>K.TGAEDRLADPDAR.V<br>R.VPLPLDLSVMTGVDIVLAR.N<br>R.AAGQYFAIR.G<br>R.AADAALVSGVLAVDR.L<br>R.ETPTSLVGLVLR.A<br>R.TAPAVLVQAVR.Q<br>R.LAFGSAGGFCELVPEEAK.S<br>R.IFLDIVER.I<br>K.SAIEIIGDR.A<br>R.ILAEGEAASPMSR.T<br>R.LCHDLLSPVGFANGELLELADEKPEMR.A<br>R.ILAEGEAASPMSR.T<br>R.CIELLEQSR.T<br>R.IDKDTSGLIVAAK.H<br>R.ALAEALPNSR.E<br>R.VVDHAGAILWDPAK.A<br>R.QALHAAHLGFHPVTGNR.I<br>R.GYGLPVSELISEGNIGLMQGVK.K<br>K.SNPPAVVWALGGESLNR.Y<br>K.TLEDLSQLYDVS.R<br>R.ASIQEFILR.S<br>R.FQEHGDNEAAQLVTSHLR.L<br>R.HDLLTEALETLNERER.H<br>R.HDLLTEALETLNER.E<br>R.DVRRDLTEALETLNER.E<br>K.NNLEAFEDGDLSPHVAK.I<br>R.KFPLTPEQYMLAK.R<br>R.KRFQEHGDNEAAQLVTSHLR.L<br>R.LATYAMWVIR.A<br>R.MKNNLEAFEDGDLSPHVAK.I<br>R.LTDPKTELEDLSQLYDVS.R.E<br>K.LATDLVTEDEVSMNR.R<br>R.SLATADAADAK.S<br>K.ASEIEAATDKK.D<br>K.IAEATGGLAFGNVTMGR.A<br>K.ASEIEAATDKK.K<br>K.DGDPGGERPKA.<br>R.AQHYAWGGAGDGRS.S<br>R.GWDYFAGLSAEDAAR.A<br>R.AAEEAQGAR.S<br>R.FAAGQAFAVELK.Q<br>R.ALEILGLDPDAFDATK.K<br>R.YDGYAALAAALDER.L<br>R.LQAHHVIAQR.S<br>K.LFVHTQEEQDKR.F<br>R.YFEWPIGAPTEEK.A<br>R.SVIMVEGWDAAGK.G                                                                                                                                                                                                                                                                                                                                                                                                                                                                                                                                                                                                                                                                                                                                                                                                                                                                                                                                                                                                                                                                                              |
| YP_616778 | Sala_1732 | Lytic transglycosylase, catalytic                                   | 49.48%            | 22                      | R.DQRHEASTSDTAAG.<br>R.QGHTLVRLSYVFNRR.G<br>R.EINKLHAGVAR.Q<br>K.ALADASDLPIVVYVGR.T<br>R.DGAFDAPTFAR.L<br>R.AVVDAALASAGVI.<br>R.VHDWFSFEVRL.L<br>R.LPIPAASGAR.A<br>K.LAEIPTVAVK.D<br>R.VPVIAGCGSNDTATAIR.H<br>R.HAQASGADAALIVAPYRNRSQEGMIAHFK.A<br>K.DASGDLAR.V<br>R.PAPNPTIEVSADEQR.A<br>R.IANSGASDFQLSR.F<br>R.VLENAVYDTR.D<br>K.AIALDSFDPAR.T<br>R.SLAQAPTDAAEWLETLTNR.L<br>R.RQEHAHAVR.R<br>R.APLSFYLGK.R<br>R.VYGGSYPLVAAVYAGPWNWK.W<br>R.TGADILDWIEAIPFETR.N<br>R.SGAVDAALQASAVESANSIVR.T<br>R.LAESSGDKLSAFNIAR.Q<br>K.ASTPADHVLGK.L<br>R.VPAGHEGNWTFIHATR.Q<br>R.VLGMFPALTLADHDAR.M<br>R.SAQANSLDAVEVSGFPTVR.V<br>R.QLDDAFPPGTVIR.E<br>R.ETPLVRRDYSLAWLAGQLAFR.D<br>R.DAANAHFADAAQHYDQFYGLALER.L<br>R.AWTSGLDDYETSR.V<br>R.ALGEIGAWR.E<br>R.AALAAGDRDAANAHFADAAQHYDQFYGLALER.L<br>R.AAISHAGAR.G<br>R.SENGDIYGR.K<br>R.VTTLVGDDEAEAGSGR.I<br>R.AEYDALLGDER.P<br>K.TNISPAGFAALR.A<br>R.SQALYEAEEK.G<br>R.LIGEDPELTIADVLSR.H<br>K.GRPALDFAPVGSPPFAAVK.E<br>K.LTLDPLWTDAGLLALER.F<br>R.AILLALLPQPEGN.<br>R.GNVVGHSDIAPTR.K<br>R.KDQDPEFPVEELAR.R<br>K.TGAEDRLADPDAR.V<br>R.VPLPLDLSVMTGVDIVLAR.N<br>R.AAGQYFAIR.G<br>R.AADAALVSGVLAVDR.L<br>R.ETPTSLVGLVLR.A<br>R.TAPAVLVQAVR.Q<br>R.LAFGSAGGFCELVPEEAK.S<br>R.IFLDIVER.I<br>K.SAIEIIGDR.A<br>R.ILAEGEAASPMSR.T<br>R.LCHDLLSPVGFANGELLELADEKPEMR.A<br>R.ILAEGEAASPMSR.T<br>R.CIELLEQSR.T<br>R.IDKDTSGLIVAAK.H<br>R.ALAEALPNSR.E<br>R.VVDHAGAILWDPAK.A<br>R.QALHAAHLGFHPVTGNR.I<br>R.GYGLPVSELISEGNIGLMQGVK.K<br>K.SNPPAVVWALGGESLNR.Y<br>K.TLEDLSQLYDVS.R<br>R.ASIQEFILR.S<br>R.FQEHGDNEAAQLVTSHLR.L<br>R.HDLLTEALETLNERER.H<br>R.HDLLTEALETLNER.E<br>R.DVRRDLTEALETLNER.E<br>K.NNLEAFEDGDLSPHVAK.I<br>R.KFPLTPEQYMLAK.R<br>R.KRFQEHGDNEAAQLVTSHLR.L<br>R.LATYAMWVIR.A<br>R.MKNNLEAFEDGDLSPHVAK.I<br>R.LTDPKTELEDLSQLYDVS.R.E<br>K.LATDLVTEDEVSMNR.R<br>R.SLATADAADAK.S<br>K.ASEIEAATDKK.D<br>K.IAEATGGLAFGNVTMGR.A<br>K.ASEIEAATDKK.K<br>K.DGDPGGERPKA.<br>R.AQHYAWGGAGDGRS.S<br>R.GWDYFAGLSAEDAAR.A<br>R.AAEEAQGAR.S<br>R.FAAGQAFAVELK.Q<br>R.ALEILGLDPDAFDATK.K<br>R.YDGYAALAAALDER.L<br>R.LQAHHVIAQR.S<br>K.LFVHTQEEQDKR.F<br>R.YFEWPIGAPTEEK.A<br>R.SVIMVEGWDAAGK.G                                                                                                                                                                                                                                                                                                                                                                                                                                                                                                                                                                                                                                                                                                                                                                                                                                                                                                                                                                                                                                                  |
| YP_616779 | Sala_1733 | transcription elongation factor GreB                                | 31.25%            | 4                       | R.SENGDIYGR.K<br>R.VTTLVGDDEAEAGSGR.I<br>R.AEYDALLGDER.P<br>K.TNISPAGFAALR.A<br>R.SQALYEAEEK.G<br>R.LIGEDPELTIADVLSR.H<br>K.GRPALDFAPVGSPPFAAVK.E<br>K.LTLDPLWTDAGLLALER.F<br>R.AILLALLPQPEGN.<br>R.GNVVGHSDIAPTR.K<br>R.KDQDPEFPVEELAR.R<br>K.TGAEDRLADPDAR.V<br>R.VPLPLDLSVMTGVDIVLAR.N<br>R.AAGQYFAIR.G<br>R.AADAALVSGVLAVDR.L<br>R.ETPTSLVGLVLR.A<br>R.TAPAVLVQAVR.Q<br>R.LAFGSAGGFCELVPEEAK.S<br>R.IFLDIVER.I<br>K.SAIEIIGDR.A<br>R.ILAEGEAASPMSR.T<br>R.LCHDLLSPVGFANGELLELADEKPEMR.A<br>R.ILAEGEAASPMSR.T<br>R.CIELLEQSR.T<br>R.IDKDTSGLIVAAK.H<br>R.ALAEALPNSR.E<br>R.VVDHAGAILWDPAK.A<br>R.QALHAAHLGFHPVTGNR.I<br>R.GYGLPVSELISEGNIGLMQGVK.K<br>K.SNPPAVVWALGGESLNR.Y<br>K.TLEDLSQLYDVS.R<br>R.ASIQEFILR.S<br>R.FQEHGDNEAAQLVTSHLR.L<br>R.HDLLTEALETLNERER.H<br>R.HDLLTEALETLNER.E<br>R.DVRRDLTEALETLNER.E<br>K.NNLEAFEDGDLSPHVAK.I<br>R.KFPLTPEQYMLAK.R<br>R.KRFQEHGDNEAAQLVTSHLR.L<br>R.LATYAMWVIR.A<br>R.MKNNLEAFEDGDLSPHVAK.I<br>R.LTDPKTELEDLSQLYDVS.R.E<br>K.LATDLVTEDEVSMNR.R<br>R.SLATADAADAK.S<br>K.ASEIEAATDKK.D<br>K.IAEATGGLAFGNVTMGR.A<br>K.ASEIEAATDKK.K<br>K.DGDPGGERPKA.<br>R.AQHYAWGGAGDGRS.S<br>R.GWDYFAGLSAEDAAR.A<br>R.AAEEAQGAR.S<br>R.FAAGQAFAVELK.Q<br>R.ALEILGLDPDAFDATK.K<br>R.YDGYAALAAALDER.L<br>R.LQAHHVIAQR.S<br>K.LFVHTQEEQDKR.F<br>R.YFEWPIGAPTEEK.A<br>R.SVIMVEGWDAAGK.G                                                                                                                                                                                                                                                                                                                                                                                                                                                                                                                                                                                                                                                                                                                                                                                                                                                                                                                                                                                                                                                                                                                                                                                                                                                                                                                                                                                                                                                                                                                                                                                                                                                                                                                                                                                                                                                            |
| YP_616780 | Sala_1734 | peptidase C14, caspase catalytic subunit p20                        | 8.77%             | 3                       | R.SENGDIYGR.K<br>R.VTTLVGDDEAEAGSGR.I<br>R.AEYDALLGDER.P<br>K.TNISPAGFAALR.A<br>R.SQALYEAEEK.G<br>R.LIGEDPELTIADVLSR.H<br>K.GRPALDFAPVGSPPFAAVK.E<br>K.LTLDPLWTDAGLLALER.F<br>R.AILLALLPQPEGN.<br>R.GNVVGHSDIAPTR.K<br>R.KDQDPEFPVEELAR.R<br>K.TGAEDRLADPDAR.V<br>R.VPLPLDLSVMTGVDIVLAR.N<br>R.AAGQYFAIR.G<br>R.AADAALVSGVLAVDR.L<br>R.ETPTSLVGLVLR.A<br>R.TAPAVLVQAVR.Q<br>R.LAFGSAGGFCELVPEEAK.S<br>R.IFLDIVER.I<br>K.SAIEIIGDR.A<br>R.ILAEGEAASPMSR.T<br>R.LCHDLLSPVGFANGELLELADEKPEMR.A<br>R.ILAEGEAASPMSR.T<br>R.CIELLEQSR.T<br>R.IDKDTSGLIVAAK.H<br>R.ALAEALPNSR.E<br>R.VVDHAGAILWDPAK.A<br>R.QALHAAHLGFHPVTGNR.I<br>R.GYGLPVSELISEGNIGLMQGVK.K<br>K.SNPPAVVWALGGESLNR.Y<br>K.TLEDLSQLYDVS.R<br>R.ASIQEFILR.S<br>R.FQEHGDNEAAQLVTSHLR.L<br>R.HDLLTEALETLNERER.H<br>R.HDLLTEALETLNER.E<br>R.DVRRDLTEALETLNER.E<br>K.NNLEAFEDGDLSPHVAK.I<br>R.KFPLTPEQYMLAK.R<br>R.KRFQEHGDNEAAQLVTSHLR.L<br>R.LATYAMWVIR.A<br>R.MKNNLEAFEDGDLSPHVAK.I<br>R.LTDPKTELEDLSQLYDVS.R.E<br>K.LATDLVTEDEVSMNR.R<br>R.SLATADAADAK.S<br>K.ASEIEAATDKK.D<br>K.IAEATGGLAFGNVTMGR.A<br>K.ASEIEAATDKK.K<br>K.DGDPGGERPKA.<br>R.AQHYAWGGAGDGRS.S<br>R.GWDYFAGLSAEDAAR.A<br>R.AAEEAQGAR.S<br>R.FAAGQAFAVELK.Q<br>R.ALEILGLDPDAFDATK.K<br>R.YDGYAALAAALDER.L<br>R.LQAHHVIAQR.S<br>K.LFVHTQEEQDKR.F<br>R.YFEWPIGAPTEEK.A<br>R.SVIMVEGWDAAGK.G                                                                                                                                                                                                                                                                                                                                                                                                                                                                                                                                                                                                                                                                                                                                                                                                                                                                                                                                                                                                                                                                                                                                                                                                                                                                                                                                                                                                                                                                                                                                                                                                                                                                                                                                                                                                                                                            |
| YP_616781 | Sala_1735 | N-acetylmuramyl-L-alanine amidase, negative regulator of AmpC, AmpD | 32.31%            | 5                       | R.SENGDIYGR.K<br>R.VTTLVGDDEAEAGSGR.I<br>R.AEYDALLGDER.P<br>K.TNISPAGFAALR.A<br>R.SQALYEAEEK.G<br>R.LIGEDPELTIADVLSR.H<br>K.GRPALDFAPVGSPPFAAVK.E<br>K.LTLDPLWTDAGLLALER.F<br>R.AILLALLPQPEGN.<br>R.GNVVGHSDIAPTR.K<br>R.KDQDPEFPVEELAR.R<br>K.TGAEDRLADPDAR.V<br>R.VPLPLDLSVMTGVDIVLAR.N<br>R.AAGQYFAIR.G<br>R.AADAALVSGVLAVDR.L<br>R.ETPTSLVGLVLR.A<br>R.TAPAVLVQAVR.Q<br>R.LAFGSAGGFCELVPEEAK.S<br>R.IFLDIVER.I<br>K.SAIEIIGDR.A<br>R.ILAEGEAASPMSR.T<br>R.LCHDLLSPVGFANGELLELADEKPEMR.A<br>R.ILAEGEAASPMSR.T<br>R.CIELLEQSR.T<br>R.IDKDTSGLIVAAK.H<br>R.ALAEALPNSR.E<br>R.VVDHAGAILWDPAK.A<br>R.QALHAAHLGFHPVTGNR.I<br>R.GYGLPVSELISEGNIGLMQGVK.K<br>K.SNPPAVVWALGGESLNR.Y<br>K.TLEDLSQLYDVS.R<br>R.ASIQEFILR.S<br>R.FQEHGDNEAAQLVTSHLR.L<br>R.HDLLTEALETLNERER.H<br>R.HDLLTEALETLNER.E<br>R.DVRRDLTEALETLNER.E<br>K.NNLEAFEDGDLSPHVAK.I<br>R.KFPLTPEQYMLAK.R<br>R.KRFQEHGDNEAAQLVTSHLR.L<br>R.LATYAMWVIR.A<br>R.MKNNLEAFEDGDLSPHVAK.I<br>R.LTDPKTELEDLSQLYDVS.R.E<br>K.LATDLVTEDEVSMNR.R<br>R.SLATADAADAK.S<br>K.ASEIEAATDKK.D<br>K.IAEATGGLAFGNVTMGR.A<br>K.ASEIEAATDKK.K<br>K.DGDPGGERPKA.<br>R.AQHYAWGGAGDGRS.S<br>R.GWDYFAGLSAEDAAR.A<br>R.AAEEAQGAR.S<br>R.FAAGQAFAVELK.Q<br>R.ALEILGLDPDAFDATK.K<br>R.YDGYAALAAALDER.L<br>R.LQAHHVIAQR.S<br>K.LFVHTQEEQDKR.F<br>R.YFEWPIGAPTEEK.A<br>R.SVIMVEGWDAAGK.G                                                                                                                                                                                                                                                                                                                                                                                                                                                                                                                                                                                                                                                                                                                                                                                                                                                                                                                                                                                                                                                                                                                                                                                                                                                                                                                                                                                                                                                                                                                                                                                                                                                                                                                                                                                                                                                            |
| YP_616786 | Sala_1740 | CheA signal transduction histidine kinases                          | 5.70%             | 3                       | R.SENGDIYGR.K<br>R.VTTLVGDDEAEAGSGR.I<br>R.AEYDALLGDER.P<br>K.TNISPAGFAALR.A<br>R.SQALYEAEEK.G<br>R.LIGEDPELTIADVLSR.H<br>K.GRPALDFAPVGSPPFAAVK.E<br>K.LTLDPLWTDAGLLALER.F<br>R.AILLALLPQPEGN.<br>R.GNVVGHSDIAPTR.K<br>R.KDQDPEFPVEELAR.R<br>K.TGAEDRLADPDAR.V<br>R.VPLPLDLSVMTGVDIVLAR.N<br>R.AAGQYFAIR.G<br>R.AADAALVSGVLAVDR.L<br>R.ETPTSLVGLVLR.A<br>R.TAPAVLVQAVR.Q<br>R.LAFGSAGGFCELVPEEAK.S<br>R.IFLDIVER.I<br>K.SAIEIIGDR.A<br>R.ILAEGEAASPMSR.T<br>R.LCHDLLSPVGFANGELLELADEKPEMR.A<br>R.ILAEGEAASPMSR.T<br>R.CIELLEQSR.T<br>R.IDKDTSGLIVAAK.H<br>R.ALAEALPNSR.E<br>R.VVDHAGAILWDPAK.A<br>R.QALHAAHLGFHPVTGNR.I<br>R.GYGLPVSELISEGNIGLMQGVK.K<br>K.SNPPAVVWALGGESLNR.Y<br>K.TLEDLSQLYDVS.R<br>R.ASIQEFILR.S<br>R.FQEHGDNEAAQLVTSHLR.L<br>R.HDLLTEALETLNERER.H<br>R.HDLLTEALETLNER.E<br>R.DVRRDLTEALETLNER.E<br>K.NNLEAFEDGDLSPHVAK.I<br>R.KFPLTPEQYMLAK.R<br>R.KRFQEHGDNEAAQLVTSHLR.L<br>R.LATYAMWVIR.A<br>R.MKNNLEAFEDGDLSPHVAK.I<br>R.LTDPKTELEDLSQLYDVS.R.E<br>K.LATDLVTEDEVSMNR.R<br>R.SLATADAADAK.S<br>K.ASEIEAATDKK.D<br>K.IAEATGGLAFGNVTMGR.A<br>K.ASEIEAATDKK.K<br>K.DGDPGGERPKA.<br>R.AQHYAWGGAGDGRS.S<br>R.GWDYFAGLSAEDAAR.A<br>R.AAEEAQGAR.S<br>R.FAAGQAFAVELK.Q<br>R.ALEILGLDPDAFDATK.K<br>R.YDGYAALAAALDER.L<br>R.LQAHHVIAQR.S<br>K.LFVHTQEEQDKR.F<br>R.YFEWPIGAPTEEK.A<br>R.SVIMVEGWDAAGK.G                                                                                                                                                                                                                                                                                                                                                                                                                                                                                                                                                                                                                                                                                                                                                                                                                                                                                                                                                                                                                                                                                                                                                                                                                                                                                                                                                                                                                                                                                                                                                                                                                                                                                                                                                                                                                                                            |
| YP_616787 | Sala_1741 | hypothetical protein                                                | 53.74%            | 9                       | R.SENGDIYGR.K<br>R.VTTLVGDDEAEAGSGR.I<br>R.AEYDALLGDER.P<br>K.TNISPAGFAALR.A<br>R.SQALYEAEEK.G<br>R.LIGEDPELTIADVLSR.H<br>K.GRPALDFAPVGSPPFAAVK.E<br>K.LTLDPLWTDAGLLALER.F<br>R.AILLALLPQPEGN.<br>R.GNVVGHSDIAPTR.K<br>R.KDQDPEFPVEELAR.R<br>K.TGAEDRLADPDAR.V<br>R.VPLPLDLSVMTGVDIVLAR.N<br>R.AAGQYFAIR.G<br>R.AADAALVSGVLAVDR.L<br>R.ETPTSLVGLVLR.A<br>R.TAPAVLVQAVR.Q<br>R.LAFGSAGGFCELVPEEAK.S<br>R.IFLDIVER.I<br>K.SAIEIIGDR.A<br>R.ILAEGEAASPMSR.T<br>R.LCHDLLSPVGFANGELLELADEKPEMR.A<br>R.ILAEGEAASPMSR.T<br>R.CIELLEQSR.T<br>R.IDKDTSGLIVAAK.H<br>R.ALAEALPNSR.E<br>R.VVDHAGAILWDPAK.A<br>R.QALHAAHLGFHPVTGNR.I<br>R.GYGLPVSELISEGNIGLMQGVK.K<br>K.SNPPAVVWALGGESLNR.Y<br>K.TLEDLSQLYDVS.R<br>R.ASIQEFILR.S<br>R.FQEHGDNEAAQLVTSHLR.L<br>R.HDLLTEALETLNERER.H<br>R.HDLLTEALETLNER.E<br>R.DVRRDLTEALETLNER.E<br>K.NNLEAFEDGDLSPHVAK.I<br>R.KFPLTPEQYMLAK.R<br>R.KRFQEHGDNEAAQLVTSHLR.L<br>R.LATYAMWVIR.A<br>R.MKNNLEAFEDGDLSPHVAK.I<br>R.LTDPKTELEDLSQLYDVS.R.E<br>K.LATDLVTEDEVSMNR.R<br>R.SLATADAADAK.S<br>K.ASEIEAATDKK.D<br>K.IAEATGGLAFGNVTMGR.A<br>K.ASEIEAATDKK.K<br>K.DGDPGGERPKA.<br>R.AQHYAWGGAGDGRS.S<br>R.GWDYFAGLSAEDAAR.A<br>R.AAEEAQGAR.S<br>R.FAAGQAFAVELK.Q<br>R.ALEILGLDPDAFDATK.K<br>R.YDGYAALAAALDER.L<br>R.LQAHHVIAQR.S<br>K.LFVHTQEEQDKR.F<br>R.YFEWPIGAPTEEK.A<br>R.SVIMVEGWDAAGK.G                                                                                                                                                                                                                                                                                                                                                                                                                                                                                                                                                                                                                                                                                                                                                                                                                                                                                                                                                                                                                                                                                                                                                                                                                                                                                                                                                                                                                                                                                                                                                                                                                                                                                                                                                                                                                                                            |
| YP_616788 | Sala_1742 | Pseudouridine synthase, RluD                                        | 15.16%            | 4                       | R.SENGDIYGR.K<br>R.VTTLVGDDEAEAGSGR.I<br>R.AEYDALLGDER.P<br>K.TNISPAGFAALR.A<br>R.SQALYEAEEK.G<br>R.LIGEDPELTIADVLSR.H<br>K.GRPALDFAPVGSPPFAAVK.E<br>K.LTLDPLWTDAGLLALER.F<br>R.AILLALLPQPEGN.<br>R.GNVVGHSDIAPTR.K<br>R.KDQDPEFPVEELAR.R<br>K.TGAEDRLADPDAR.V<br>R.VPLPLDLSVMTGVDIVLAR.N<br>R.AAGQYFAIR.G<br>R.AADAALVSGVLAVDR.L<br>R.ETPTSLVGLVLR.A<br>R.TAPAVLVQAVR.Q<br>R.LAFGSAGGFCELVPEEAK.S<br>R.IFLDIVER.I<br>K.SAIEIIGDR.A<br>R.ILAEGEAASPMSR.T<br>R.LCHDLLSPVGFANGELLELADEKPEMR.A<br>R.ILAEGEAASPMSR.T<br>R.CIELLEQSR.T<br>R.IDKDTSGLIVAAK.H<br>R.ALAEALPNSR.E<br>R.VVDHAGAILWDPAK.A<br>R.QALHAAHLGFHPVTGNR.I<br>R.GYGLPVSELISEGNIGLMQGVK.K<br>K.SNPPAVVWALGGESLNR.Y<br>K.TLEDLSQLYDVS.R<br>R.ASIQEFILR.S<br>R.FQEHGDNEAAQLVTSHLR.L<br>R.HDLLTEALETLNERER.H<br>R.HDLLTEALETLNER.E<br>R.DVRRDLTEALETLNER.E<br>K.NNLEAFEDGDLSPHVAK.I<br>R.KFPLTPEQYMLAK.R<br>R.KRFQEHGDNEAAQLVTSHLR.L<br>R.LATYAMWVIR.A<br>R.MKNNLEAFEDGDLSPHVAK.I<br>R.LTDPKTELEDLSQLYDVS.R.E<br>K.LATDLVTEDEVSMNR.R<br>R.SLATADAADAK.S<br>K.ASEIEAATDKK.D<br>K.IAEATGGLAFGNVTMGR.A<br>K.ASEIEAATDKK.K<br>K.DGDPGGERPKA.<br>R.AQHYAWGGAGDGRS.S<br>R.GWDYFAGLSAEDAAR.A<br>R.AAEEAQGAR.S<br>R.FAAGQAFAVELK.Q<br>R.ALEILGLDPDAFDATK.K<br>R.YDGYAALAAALDER.L<br>R.LQAHHVIAQR.S<br>K.LFVHTQEEQDKR.F<br>R.YFEWPIGAPTEEK.A<br>R.SVIMVEGWDAAGK.G                                                                                                                                                                                                                                                                                                                                                                                                                                                                                                                                                                                                                                                                                                                                                                                                                                                                                                                                                                                                                                                                                                                                                                                                                                                                                                                                                                                                                                                                                                                                                                                                                                                                                                                                                                                                                                                            |
| YP_616789 | Sala_1743 | RNA polymerase sigma factor RpoH                                    | 61.00%            | 15                      | R.SENGDIYGR.K<br>R.VTTLVGDDEAEAGSGR.I<br>R.AEYDALLGDER.P<br>K.TNISPAGFAALR.A<br>R.SQALYEAEEK.G<br>R.LIGEDPELTIADVLSR.H<br>K.GRPALDFAPVGSPPFAAVK.E<br>K.LTLDPLWTDAGLLALER.F<br>R.AILLALLPQPEGN.<br>R.GNVVGHSDIAPTR.K<br>R.KDQDPEFPVEELAR.R<br>K.TGAEDRLADPDAR.V<br>R.VPLPLDLSVMTGVDIVLAR.N<br>R.AAGQYFAIR.G<br>R.AADAALVSGVLAVDR.L<br>R.ETPTSLVGLVLR.A<br>R.TAPAVLVQAVR.Q<br>R.LAFGSAGGFCELVPEEAK.S<br>R.IFLDIVER.I<br>K.SAIEIIGDR.A<br>R.ILAEGEAASPMSR.T<br>R.LCHDLLSPVGFANGELLELADEKPEMR.A<br>R.ILAEGEAASPMSR.T<br>R.CIELLEQSR.T<br>R.IDKDTSGLIVAAK.H<br>R.ALAEALPNSR.E<br>R.VVDHAGAILWDPAK.A<br>R.QALHAAHLGFHPVTGNR.I<br>R.GYGLPVSELISEGNIGLMQGVK.K<br>K.SNPPAVVWALGGESLNR.Y<br>K.TLEDLSQLYDVS.R<br>R.ASIQEFILR.S<br>R.FQEHGDNEAAQLVTSHLR.L<br>R.HDLLTEALETLNERER.H<br>R.HDLLTEALETLNER.E<br>R.DVRRDLTEALETLNER.E<br>K.NNLEAFEDGDLSPHVAK.I<br>R.KFPLTPEQYMLAK.R<br>R.KRFQEHGDNEAAQLVTSHLR.L<br>R.LATYAMWVIR.A<br>R.MKNNLEAFEDGDLSPHVAK.I<br>R.LTDPKTELEDLSQLYDVS.R.E<br>K.LATDLVTEDEVSMNR.R<br>R.SLATADAADAK.S<br>K.ASEIEAATDKK.D<br>K.IAEATGGLAFGNVTMGR.A<br>K.ASEIEAATDKK.K<br>K.DGDPGGERPKA.<br>R.AQHYAWGGAGDGRS.S<br>R.GWDYFAGLSAEDAAR.A<br>R.AAEEAQGAR.S<br>R.FAAGQAFAVELK.Q<br>R.ALEILGLDPDAFDATK.K<br>R.YDGYAALAAALDER.L<br>R.LQAHHVIAQR.S<br>K.LFVHTQEEQDKR.F<br>R.YFEWPIGAPTEEK.A<br>R.SVIMVEGWDAAGK.G                                                                                                                                                                                                                                                                                                                                                                                                                                                                                                                                                                                                                                                                                                                                                                                                                                                                                                                                                                                                                                                                                                                                                                                                                                                                                                                                                                                                                                                                                                                                                                                                                                                                                                                                                                                                                                                            |
| YP_616792 | Sala_1746 | hypothetical protein                                                | 25.35%            | 5                       | R.SENGDIYGR.K<br>R.VTTLVGDDEAEAGSGR.I<br>R.AEYDALLGDER.P<br>K.TNISPAGFAALR.A<br>R.SQALYEAEEK.G<br>R.LIGEDPELTIADVLSR.H<br>K.GRPALDFAPVGSPPFAAVK.E<br>K.LTLDPLWTDAGLLALER.F<br>R.AILLALLPQPEGN.<br>R.GNVVGHSDIAPTR.K<br>R.KDQDPEFPVEELAR.R<br>K.TGAEDRLADPDAR.V<br>R.VPLPLDLSVMTGVDIVLAR.N<br>R.AAGQYFAIR.G<br>R.AADAALVSGVLAVDR.L<br>R.ETPTSLVGLVLR.A<br>R.TAPAVLVQAVR.Q<br>R.LAFGSAGGFCELVPEEAK.S<br>R.IFLDIVER.I<br>K.SAIEIIGDR.A<br>R.ILAEGEAASPMSR.T<br>R.LCHDLLSPVGFANGELLELADEKPEMR.A<br>R.ILAEGEAASPMSR.T<br>R.CIELLEQSR.T<br>R.IDKDTSGLIVAAK.H<br>R.ALAEALPNSR.E<br>R.VVDHAGAILWDPAK.A<br>R.QALHAAHLGFHPVTGNR.I<br>R.GYGLPVSELISEGNIGLMQGVK.K<br>K.SNPPAVVWALGGESLNR.Y<br>K.TLEDLSQLYDVS.R<br>R.ASIQEFILR.S<br>R.FQEHGDNEAAQLVTSHLR.L<br>R.HDLLTEALETLNERER.H<br>R.HDLLTEALETLNER.E<br>R.DVRRDLTEALETLNER.E<br>K.NNLEAFEDGDLSPHVAK.I<br>R.KFPLTPEQYMLAK.R<br>R.KRFQEHGDNEAAQLVTSHLR.L<br>R.LATYAMWVIR.A<br>R.MKNNLEAFEDGDLSPHVAK.I<br>R.LTDPKTELEDLSQLYDVS.R.E<br>K.LATDLVTEDEVSMNR.R<br>R.SLATADAADAK.S<br>K.ASEIEAATDKK.D<br>K.IAEATGGLAFGNVTMGR.A<br>K.ASEIEAATDKK.K<br>K.DGDPGGERPKA.<br>R.AQHYAWGGAGDGRS.S<br>R.GWDYFAGLSAEDAAR.A<br>R.AAEEAQGAR.S<br>R.FAAGQAFAVELK.Q<br>R.ALEILGLDPDAFDATK.K<br>R.YDGYAALAAALDER.L<br>R.LQAHHVIAQR.S<br>K.LFVHTQEEQDKR.F<br>R.YFEWPIGAPTEEK.A<br>R.SVIMVEGWDAAGK.G                                                                                                                                                                                                                                                                                                                                                                                                                                                                                                                                                                                                                                                                                                                                                                                                                                                                                                                                                                                                                                                                                                                                                                                                                                                                                                                                                                                                                                                                                                                                                                                                                                                                                                                                                                                                                                                            |
| YP_616794 | Sala_1748 | heat shock protein DnaJ-like protein                                | 37.57%            | 5                       | R.SENGDIYGR.K<br>R.VTTLVGDDEAEAGSGR.I<br>R.AEYDALLGDER.P<br>K.TNISPAGFAALR.A<br>R.SQALYEAEEK.G<br>R.LIGEDPELTIADVLSR.H<br>K.GRPALDFAPVGSPPFAAVK.E<br>K.LTLDPLWTDAGLLALER.F<br>R.AILLALLPQPEGN.<br>R.GNVVGHSDIAPTR.K<br>R.KDQDPEFPVEELAR.R<br>K.TGAEDRLADPDAR.V<br>R.VPLPLDLSVMTGVDIVLAR.N<br>R.AAGQYFAIR.G<br>R.AADAALVSGVLAVDR.L<br>R.ETPTSLVGLVLR.A<br>R.TAPAVLVQAVR.Q<br>R.LAFGSAGGFCELVPEEAK.S<br>R.IFLDIVER.I<br>K.SAIEIIGDR.A<br>R.ILAEGEAASPMSR.T<br>R.LCHDLLSPVGFANGELLELADEKPEMR.A<br>R.ILAEGEAASPMSR.T<br>R.CIELLEQSR.T<br>R.IDKDTSGLIVAAK.H<br>R.ALAEALPNSR.E<br>R.VVDHAGAILWDPAK.A<br>R.QALHAAHLGFHPVTGNR.I<br>R.GYGLPVSELISEGNIGLMQGVK.K<br>K.SNPPAVVWALGGESLNR.Y<br>K.TLEDLSQLYDVS.R<br>R.ASIQEFILR.S<br>R.FQEHGDNEAAQLVTSHLR.L<br>R.HDLLTEALETLNERER.H<br>R.HDLLTEALETLNER.E<br>R.DVRRDLTEALETLNER.E<br>K.NNLEAFEDGDLSPHVAK.I<br>R.KFPLTPEQYMLAK.R<br>R.KRFQEHGDNEAAQLVTSHLR.L<br>R.LATYAMWVIR.A<br>R.MKNNLEAFEDGDLSPHVAK.I<br>R.LTDPKTELEDLSQLYDVS.R.E<br>K.LATDLVTEDEVSMNR.R<br>R.SLATADAADAK.S<br>K.ASEIEAATDKK.D<br>K.IAEATGGLAFGNVTMGR.A<br>K.ASEIEAATDKK.K<br>K.DGDPGGERPKA.<br>R.AQHYAWGGAGDGRS.S<br>R.GWDYFAGLSAEDAAR.A<br>R.AAEEAQGAR.S<br>R.FAAGQAFAVELK.Q<br>R.ALEILGLDPDAFDATK.K<br>R.YDGYAALAAALDER.L<br>R.LQAHHVIAQR.S<br>K.LFVHTQEEQDKR.F<br>R.YFEWPIGAPTEEK.A<br>R.SVIMVEGWDAAGK.G                                                                                                                                                                                                                                                                                                                                                                                                                                                                                                                                                                                                                                                                                                                                                                                                                                                                                                                                                                                                                                                                                                                                                                                                                                                                                                                                                                                                                                                                                                                                                                                                                                                                                                                                                                                                                                                            |
| YP_616795 | Sala_1749 | protein of unknown function DUF344                                  | 44.49%            | 8                       | R.SENGDIYGR.K<br>R.VTTLVGDDEAEAGSGR.I<br>R.AEYDALLGDER.P<br>K.TNISPAGFAALR.A<br>R.SQALYEAEEK.G<br>R.LIGEDPELTIADVLSR.H<br>K.GRPALDFAPVGSPPFAAVK.E<br>K.LTLDPLWTDAGLLALER.F<br>R.AILLALLPQPEGN.<br>R.GNVVGHSDIAPTR.K<br>R.KDQDPEFPVEELAR.R<br>K.TGAEDRLADPDAR.V<br>R.VPLPLDLSVMTGVDIVLAR.N<br>R.AAGQYFAIR.G<br>R.AADAALVSGVLAVDR.L<br>R.ETPTSLVGLVLR.A<br>R.TAPAVLVQAVR.Q<br>R.LAFGSAGGFCELVPEEAK.S<br>R.IFLDIVER.I<br>K.SAIEIIGDR.A<br>R.ILAEGEAASPMSR.T<br>R.LCHDLLSPVGFANGELLELADEKPEMR.A<br>R.ILAEGEAASPMSR.T<br>R.CIELLEQSR.T<br>R.IDKDTSGLIVAAK.H<br>R.ALAEALPNSR.E<br>R.VVDHAGAILWDPAK.A<br>R.QALHAAHLGFHPVTGNR.I<br>R.GYGLPVSELISEGNIGLMQGVK.K<br>K.SNPPAVVWALGGESLNR.Y<br>K.TLEDLSQLYDVS.R<br>R.ASIQEFILR.S<br>R.FQEHGDNEAAQLVTSHLR.L<br>R.HDLLTEALETLNERER.H<br>R.HDLLTEALETLNER.E<br>R.DVRRDLTEALETLNER.E<br>K.NNLEAFEDGDLSPHVAK.I<br>R.KFPLTPEQYMLAK.R<br>R.KRFQEHGDNEAAQLVTSHLR.L<br>R.LATYAMWVIR.A<br>R.MKNNLEAFEDGDLSPHVAK.I<br>R.LTDPKTELEDLSQLYDVS.R.E<br>K.LATDLVTEDEVSMNR.R<br>R.SLATADAADAK.S<br>K.ASEIEAATDKK.D<br>K.IAEATGGLAFGNVTMGR.A<br>K.ASEIEAATDKK.K<br>K.DGDPGGERPKA.<br>R.AQHYAWGGAGDGRS.S<br>R.GWDYFAGLSAEDAAR.A<br>R.AAEEAQGAR.S<br>R.FAAGQAFAVELK.Q<br>R.ALEILGLDPDAFDATK.K<br>R.YDGYAALAAALDER.L<br>R.LQAHHVIAQR.S<br>K.LFVHTQEEQDKR.F<br>R.YFEWPIGAPTEEK.A<br>R.SVIMVEGWDAAGK.G                                                                                                                                                                                                                                                                                                                                                                                                                                                                                                                                                                                                                                                                                                                                                                                                                                                                                                                                                                                                                                                                                                                                                                                                                                                                                                                                                                                                                                                                                                                                                                                                                                                                                                                                                                                                                                                            |



| Accession | Locus tag | Description                          | Sequence coverage | No. peptides identified | List of peptides identified                                                                                                                                                                                                                                                                                                                                                                                                                                                                                                                                                                                                                                                                                                                                                                                                                                                                                                                                                                                                                                                                                                                                                                                                                                                                                                                                                                                                                                                                                                                                                                                                                                                                                                                                                                                                                                                                                                                                                                                                                                                                                                                                                                                                                                                                                                                                                                                                                                                                                                                                                                                                                                                                                                                                                                                                                                                                                                                                                                                                                                                                                                                                                                                                                                                                                                 |
|-----------|-----------|--------------------------------------|-------------------|-------------------------|-----------------------------------------------------------------------------------------------------------------------------------------------------------------------------------------------------------------------------------------------------------------------------------------------------------------------------------------------------------------------------------------------------------------------------------------------------------------------------------------------------------------------------------------------------------------------------------------------------------------------------------------------------------------------------------------------------------------------------------------------------------------------------------------------------------------------------------------------------------------------------------------------------------------------------------------------------------------------------------------------------------------------------------------------------------------------------------------------------------------------------------------------------------------------------------------------------------------------------------------------------------------------------------------------------------------------------------------------------------------------------------------------------------------------------------------------------------------------------------------------------------------------------------------------------------------------------------------------------------------------------------------------------------------------------------------------------------------------------------------------------------------------------------------------------------------------------------------------------------------------------------------------------------------------------------------------------------------------------------------------------------------------------------------------------------------------------------------------------------------------------------------------------------------------------------------------------------------------------------------------------------------------------------------------------------------------------------------------------------------------------------------------------------------------------------------------------------------------------------------------------------------------------------------------------------------------------------------------------------------------------------------------------------------------------------------------------------------------------------------------------------------------------------------------------------------------------------------------------------------------------------------------------------------------------------------------------------------------------------------------------------------------------------------------------------------------------------------------------------------------------------------------------------------------------------------------------------------------------------------------------------------------------------------------------------------------------|
|           |           |                                      |                   |                         | R.WAANEIAIEGVAFTQTLVAEPNLYPESFVER.C<br>K.LQTSQATQVHVDFASTGSPSADDDVLAAMGAR.L<br>K.ALGMGALLGVAQGSSTRPPR.L<br>R.EGGSITAAQFLK.F<br>R.FPLSPAYDKLIDSPIADM.K<br>R.ANVVGVVGLVENMPDGNMRPQDIVTTMSGQTVLEVINTDAEGR.L<br>K.WDMGGAGAVAGAMK.A<br>R.EGGSITAAQFLK.R<br>K.RLLVIGEGSEHDLER.G<br>K.GVTFDTGGISLKPQGMMDMMK.W<br>R.LVLCDAISWAQ.V<br>R.LLVIGEGSEHDLERGAALTAK.L<br>K.WDMGGAGAVAGAMK.A<br>K.WDMGGAGAVAGAMK.A<br>K.LIDSPIADM.K<br>R.FVNDGVAWAHLDIAGMAWADKDPVYAK.G<br>R.FPLSPAYDKLIDSPIADM.K<br>R.FPLSPAYDK.L<br>K.WDMGGAGAVAGAMK.A<br>K.LIDSPIADM.K<br>K.GVTFDTGGISLKPQGMMDMMK.W<br>K.ALGMGALLGVAQGSSTRPPR.L<br>R.VNDVQSQPTALPIDYR.Q<br>R.NPEGDYAGER.I<br>R.STYAVLGYR.L<br>R.EAGSGILVPEIR.L<br>R.VEIFGLPIPLPGLSHPANR.E<br>R.SNGFEVAVPYLR.L<br>R.RNEFDATGAR.S<br>R.IGGNSYLSIAGWATQLR.V<br>R.GDVYHSDENLTAIPGYR.G<br>R.AFDLEDNLFAINR.F<br>R.AFAGAQNLR.G<br>R.WPFGFEFAGGTQLTFR.V<br>R.VTYGVEWNSRP<br>R.VQVATPPK.N<br>R.PGFNINSIVQSYR.L<br>R.LTDKPSLFPDGTGLTDR.T<br>R.INGYATYGSVPLVGEDPDR.Q<br>R.GLTLGQEVTLTAMVR.G<br>R.ETSFAALDAASNR.V<br>K.SIAYGASPIAEDVLR.R<br>K.ALVPAAGAAPPAAIAWAR.E<br>R.AFDASAAIAEAAIAGGQVAVPTETVYGLAADAR.S<br>R.LFDALHAGAASAKPNIAVAIPEVGLGAINDR.L<br>R.IALVIDDGPTR.A<br>R.FYLAQVYPAITGLR.G<br>R.ALVYAAQTDGK.L<br>R.IAPIYEGTNGIAADLVGR.K<br>K.VTEGEHAGLYR.I<br>R.TALAEQSGDR.A<br>K.LGDEAAASR.A<br>R.ADVILPLAK.A<br>K.LGMAGDGLV.R<br>R.TVTDWMVGMANTADR.L<br>K.IFITFGEHDLTDNIVHLVLR.T<br>R.TPVITDKHPDVK.R<br>R.IDAMAQHDR.F<br>K.LITGEWNGTMMLEPAAGSDVVALR.S<br>R.STAEKVTGEHAGLYR.I<br>R.KLGMAGDGLV.R<br>R.GAADFPELQQLVEACR.T<br>R.FAAATPDMVEAIVAGIGFAAEVYAPLNR.V<br>R.VGDTQPPKWDNGK.V<br>R.APMVMMNAR.L<br>R.ALIDDIAR.G<br>R.VADAYADDQDHAQR.L<br>R.LATGEPYIIFIDQVNR.M<br>R.AGFAGVEADNTPAAK.F<br>K.GESTPASAAPKGGGGEPE.V<br>R.DALLDFGKELTQDR.Y<br>R.AQVQASMLLAK.E<br>R.YLLPESYQDLFAR.V<br>R.WLLELAADR.T<br>R.RFAIVTASR.D<br>R.GGGIGTYWGA.VR.G<br>K.NSDAVWNSILR.G<br>R.GGVSQHLDFLTQDEKDVFK.T<br>R.MLDNVLQYIDR.A<br>K.LWFMPTPVLNSGGTGR.G<br>K.TSGIIPVR.V<br>R.SVGLGVMGFHSFLQAR.G<br>R.TPYIDQASNLNIPADVEKWDLLMLHR.A<br>R.MLDNVLQYIDR.A<br>R.GIGEPVGNLNGK.T<br>R.FAIVTASR.D<br>K.WDLLMLHYR.A<br>K.VTNSLNCSEITLPTGR.D<br>K.TSFEIDQR.W<br>K.IDAPAPEAK.G<br>K.ALNLHGVLTIDEFMEAVR.D<br>R.VMDSLTLAISQGSLLR.R<br>R.VMDSLTLAISQGSLLR.R<br>R.GSAACYLDSHPHEIEFLEIR.K<br>R.AQVQASMLLAK.E<br>R.FWNNVLENTR.G<br>R.TEFLQAGLTVLR.F<br>R.NLLTQIFR.F<br>R.GDWNTVWTSFDNR.K<br>K.ANDDGATTPAASDGEDMFAK.A<br>K.TYKPEYPAWDFWK.R<br>R.LEDAFIDLAFEGQVPGMTPK.E<br>R.VFKTEIK.M<br>R.AKHVDMQFGVETEDIAR.T<br>K.LLILLSQPQR.A<br>K.EKLLLSQPQR.A<br>R.AAVADDGFSVVVDGAGVPLAR.E<br>R.SAGVVVANGQELLVEGVR.A<br>R.VSTQVENAVAAIPGTVDVQR.D<br>R.GTGFNGKPAVILAQK.Q<br>R.SAVAGGAGVVPVAPISGEVLDSALVQAGVGGQR.L<br>K.AAPAEIEEGAVAFSK.E<br>R.VITLGDGTGQLVQR.G<br>K.AGSPDVGGIFRLLK.A<br>R.LGDPALWVLR.V<br>R.AAAATPDAFGHGAH.<br>R.LGTIANAYQSGEIGVELLDAYEAAR.D<br>R.VRVQASAAEAGR.L<br>R.LPPANFLAPIAETLLDR.L<br>R.VGFALPVVDVEALTVR.Y<br>R.LLAPDGLLGAIVGDSGLR.L<br>R.VGQNHAIQGSLLR.S<br>R.SQLEADQLGVQYLR.S<br>R.NADTFLASVDGLVGDPAQGVVEGR.S<br>R.AVAGNLSISPTIQR.T<br>R.SLPEWASTHPASR.V<br>R.SAGYPPMALSTMLASLANQTSLDAR.L<br>R.MAYDDYQTER.F<br>R.RVDVTVGR.G<br>R.KEGDEHPQLVQDFGGYAGPQASVNR.V<br>R.SPGDFTVTLNPNVNAFIPGGVYVTR.Q<br>R.IAQLATLGFGR.S<br>K.EGDEHPQLVQDFGGYAGPQASVNR.V<br>R.TVNGIPAYSTAR.V<br>R.VNSQSGPVDVTVFAYEFGSQAFHVALTQAGR.G<br>R.RMAYDDYQTER.F<br>R.GGVDFPMFASVR.R |
| YP_616808 | Sala_1762 | Organic solvent tolerance protein    | 33.90%            | 18                      |                                                                                                                                                                                                                                                                                                                                                                                                                                                                                                                                                                                                                                                                                                                                                                                                                                                                                                                                                                                                                                                                                                                                                                                                                                                                                                                                                                                                                                                                                                                                                                                                                                                                                                                                                                                                                                                                                                                                                                                                                                                                                                                                                                                                                                                                                                                                                                                                                                                                                                                                                                                                                                                                                                                                                                                                                                                                                                                                                                                                                                                                                                                                                                                                                                                                                                                             |
| YP_616809 | Sala_1763 | AMP-dependent synthetase and ligase  | 9.40%             | 3                       |                                                                                                                                                                                                                                                                                                                                                                                                                                                                                                                                                                                                                                                                                                                                                                                                                                                                                                                                                                                                                                                                                                                                                                                                                                                                                                                                                                                                                                                                                                                                                                                                                                                                                                                                                                                                                                                                                                                                                                                                                                                                                                                                                                                                                                                                                                                                                                                                                                                                                                                                                                                                                                                                                                                                                                                                                                                                                                                                                                                                                                                                                                                                                                                                                                                                                                                             |
| YP_616815 | Sala_1769 | Sua5/YciO/YrdC/YwIC                  | 25.08%            | 3                       |                                                                                                                                                                                                                                                                                                                                                                                                                                                                                                                                                                                                                                                                                                                                                                                                                                                                                                                                                                                                                                                                                                                                                                                                                                                                                                                                                                                                                                                                                                                                                                                                                                                                                                                                                                                                                                                                                                                                                                                                                                                                                                                                                                                                                                                                                                                                                                                                                                                                                                                                                                                                                                                                                                                                                                                                                                                                                                                                                                                                                                                                                                                                                                                                                                                                                                                             |
| YP_616816 | Sala_1770 | acyl-CoA dehydrogenase-like protein  | 44.83%            | 20                      |                                                                                                                                                                                                                                                                                                                                                                                                                                                                                                                                                                                                                                                                                                                                                                                                                                                                                                                                                                                                                                                                                                                                                                                                                                                                                                                                                                                                                                                                                                                                                                                                                                                                                                                                                                                                                                                                                                                                                                                                                                                                                                                                                                                                                                                                                                                                                                                                                                                                                                                                                                                                                                                                                                                                                                                                                                                                                                                                                                                                                                                                                                                                                                                                                                                                                                                             |
| YP_616819 | Sala_1773 | Ribonucleoside-diphosphate reductase | 52.07%            | 29                      |                                                                                                                                                                                                                                                                                                                                                                                                                                                                                                                                                                                                                                                                                                                                                                                                                                                                                                                                                                                                                                                                                                                                                                                                                                                                                                                                                                                                                                                                                                                                                                                                                                                                                                                                                                                                                                                                                                                                                                                                                                                                                                                                                                                                                                                                                                                                                                                                                                                                                                                                                                                                                                                                                                                                                                                                                                                                                                                                                                                                                                                                                                                                                                                                                                                                                                                             |
| YP_616820 | Sala_1774 | protein of unknown function DUF559   | 16.44%            | 2                       |                                                                                                                                                                                                                                                                                                                                                                                                                                                                                                                                                                                                                                                                                                                                                                                                                                                                                                                                                                                                                                                                                                                                                                                                                                                                                                                                                                                                                                                                                                                                                                                                                                                                                                                                                                                                                                                                                                                                                                                                                                                                                                                                                                                                                                                                                                                                                                                                                                                                                                                                                                                                                                                                                                                                                                                                                                                                                                                                                                                                                                                                                                                                                                                                                                                                                                                             |
| YP_616821 | Sala_1775 | Ribonucleoside-diphosphate reductase | 29.66%            | 7                       |                                                                                                                                                                                                                                                                                                                                                                                                                                                                                                                                                                                                                                                                                                                                                                                                                                                                                                                                                                                                                                                                                                                                                                                                                                                                                                                                                                                                                                                                                                                                                                                                                                                                                                                                                                                                                                                                                                                                                                                                                                                                                                                                                                                                                                                                                                                                                                                                                                                                                                                                                                                                                                                                                                                                                                                                                                                                                                                                                                                                                                                                                                                                                                                                                                                                                                                             |
| YP_616824 | Sala_1778 | hypothetical protein                 | 14.47%            | 2                       |                                                                                                                                                                                                                                                                                                                                                                                                                                                                                                                                                                                                                                                                                                                                                                                                                                                                                                                                                                                                                                                                                                                                                                                                                                                                                                                                                                                                                                                                                                                                                                                                                                                                                                                                                                                                                                                                                                                                                                                                                                                                                                                                                                                                                                                                                                                                                                                                                                                                                                                                                                                                                                                                                                                                                                                                                                                                                                                                                                                                                                                                                                                                                                                                                                                                                                                             |
| YP_616828 | Sala_1783 | acriflavin resistance protein        | 7.60%             | 4                       |                                                                                                                                                                                                                                                                                                                                                                                                                                                                                                                                                                                                                                                                                                                                                                                                                                                                                                                                                                                                                                                                                                                                                                                                                                                                                                                                                                                                                                                                                                                                                                                                                                                                                                                                                                                                                                                                                                                                                                                                                                                                                                                                                                                                                                                                                                                                                                                                                                                                                                                                                                                                                                                                                                                                                                                                                                                                                                                                                                                                                                                                                                                                                                                                                                                                                                                             |
| YP_616829 | Sala_1784 | Secretion protein HlyD               | 20.61%            | 6                       |                                                                                                                                                                                                                                                                                                                                                                                                                                                                                                                                                                                                                                                                                                                                                                                                                                                                                                                                                                                                                                                                                                                                                                                                                                                                                                                                                                                                                                                                                                                                                                                                                                                                                                                                                                                                                                                                                                                                                                                                                                                                                                                                                                                                                                                                                                                                                                                                                                                                                                                                                                                                                                                                                                                                                                                                                                                                                                                                                                                                                                                                                                                                                                                                                                                                                                                             |
| YP_616830 | Sala_1785 | outer membrane efflux protein        | 9.65%             | 2                       |                                                                                                                                                                                                                                                                                                                                                                                                                                                                                                                                                                                                                                                                                                                                                                                                                                                                                                                                                                                                                                                                                                                                                                                                                                                                                                                                                                                                                                                                                                                                                                                                                                                                                                                                                                                                                                                                                                                                                                                                                                                                                                                                                                                                                                                                                                                                                                                                                                                                                                                                                                                                                                                                                                                                                                                                                                                                                                                                                                                                                                                                                                                                                                                                                                                                                                                             |
| YP_616836 | Sala_1791 | Methyltransferase type 12            | 21.54%            | 3                       |                                                                                                                                                                                                                                                                                                                                                                                                                                                                                                                                                                                                                                                                                                                                                                                                                                                                                                                                                                                                                                                                                                                                                                                                                                                                                                                                                                                                                                                                                                                                                                                                                                                                                                                                                                                                                                                                                                                                                                                                                                                                                                                                                                                                                                                                                                                                                                                                                                                                                                                                                                                                                                                                                                                                                                                                                                                                                                                                                                                                                                                                                                                                                                                                                                                                                                                             |
| YP_616840 | Sala_1795 | peptidase M48, Ste24p                | 63.35%            | 21                      |                                                                                                                                                                                                                                                                                                                                                                                                                                                                                                                                                                                                                                                                                                                                                                                                                                                                                                                                                                                                                                                                                                                                                                                                                                                                                                                                                                                                                                                                                                                                                                                                                                                                                                                                                                                                                                                                                                                                                                                                                                                                                                                                                                                                                                                                                                                                                                                                                                                                                                                                                                                                                                                                                                                                                                                                                                                                                                                                                                                                                                                                                                                                                                                                                                                                                                                             |





| Accession | Locus tag | Description                                         | Sequence coverage | No. peptides identified | List of peptides identified                                                                                                                                                                                                                                                                                                                                                                                                                                                                                                                                                                                                                                                                                                                                                                                                                                                                                                                                                                                                                                                                                                                                                                                                                                                                                                                                                                                                                                                                                                                                                                                                                                                                                                                                                                                                                                                                                                                                                                                                                                                                                                                                                                                                                                                                                                                                                                                                                                                                                                                                                                                                                                                                                                                                                                                                                                                                                                                                                                                                                                                                                                                                                                                                                                                                                                 |
|-----------|-----------|-----------------------------------------------------|-------------------|-------------------------|-----------------------------------------------------------------------------------------------------------------------------------------------------------------------------------------------------------------------------------------------------------------------------------------------------------------------------------------------------------------------------------------------------------------------------------------------------------------------------------------------------------------------------------------------------------------------------------------------------------------------------------------------------------------------------------------------------------------------------------------------------------------------------------------------------------------------------------------------------------------------------------------------------------------------------------------------------------------------------------------------------------------------------------------------------------------------------------------------------------------------------------------------------------------------------------------------------------------------------------------------------------------------------------------------------------------------------------------------------------------------------------------------------------------------------------------------------------------------------------------------------------------------------------------------------------------------------------------------------------------------------------------------------------------------------------------------------------------------------------------------------------------------------------------------------------------------------------------------------------------------------------------------------------------------------------------------------------------------------------------------------------------------------------------------------------------------------------------------------------------------------------------------------------------------------------------------------------------------------------------------------------------------------------------------------------------------------------------------------------------------------------------------------------------------------------------------------------------------------------------------------------------------------------------------------------------------------------------------------------------------------------------------------------------------------------------------------------------------------------------------------------------------------------------------------------------------------------------------------------------------------------------------------------------------------------------------------------------------------------------------------------------------------------------------------------------------------------------------------------------------------------------------------------------------------------------------------------------------------------------------------------------------------------------------------------------------------|
| YP_616860 | Sala_1815 | protein of unknown function DUF404                  | 16.91%            | 4                       | R.TDSLLGVPGIWVYR.A<br>R.TTQGYTPIDVLYR.R<br>R.NYIAQPTLSLSTVPIFFR.A<br>R.AAGSITIANAFSTGIADKALYSYMPDIIIEFYTGK.A<br>R.LAAGETLDDLLPEAFATV.R.E<br>K.AAGGLVFLATER.H<br>R.TPLIISGPTDDKSELYR.V<br>R.IREEVAER.E<br>K.SINLIEGTEHVER.L<br>K.EGVQIEPENQTLASITFQNYR.M<br>K.GVHVTVNDYLAR.R<br>R.WSDGLHQAVEAK.E<br>K.VVIIDEFTGR.M<br>K.SELLSFLEK.E<br>K.AALVDAETWK.G<br>R.INAFEPANQALDDAGLQGGQATFR.A<br>R.EAYNSDITATNNELGFDYLR.D<br>R.LLEAAGLLQGSNLYDIENTQVHHVNQALK.A<br>R.GQPVLVGTVSEK.S<br>R.VNEVVLQTEEDYEKDEK.S<br>R.IFGPDTLFAK.M<br>K.EHLATLDALR.Q<br>K.LSGMTGTAATEAEFFDIYK.M<br>R.SGAVTIATNMAGR.G<br>R.FHESEAR.I<br>R.IDEEEFYK.N<br>K.NLEDGEAIGSK.W<br>R.GENPYAAEISR.N<br>K.QPINEKQEFALFER.M<br>R.RIDNQLR.G<br>R.GEIAEMATGEGK.T<br>R.GEIIDSETVDDVMAAMR.A<br>K.SELLSFLEKEGVHNSVLRN.F<br>K.EGVHNSVLRN.F<br>K.NINKEFGAJAR.T<br>R.HFDVQMIIGSVLHR.G<br>R.AQMVHRPFNFIVDEVDSILIDEAR.T<br>K.QVVEYDVMNDQR.K<br>R.VANILNLHPIDIEWMQEDAVDPEMFEER.L<br>R.PMFGIVDEVDSILIDEAR.T<br>R.IDTDYIVK.D<br>K.QVVEYDVMNDQRK.V<br>R.SGAVTIATNMAGR.G<br>R.RWSDGLHQAVEAK.E<br>R.IVAQAGR.S<br>R.INAFEPANQALDDAGLQGGQATFR.A<br>R.IDTDYIVKDGK.V<br>R.GENPYAAEISR.N<br>R.GEIAEMATGEGK.T<br>R.AQMVHRPFNFIVDEVDSILIDEAR.T<br>R.AETVNAIVADACPPGSYPEQWVVEGMK.E<br>K.SILLQTLDHHWK.E<br>K.MNIVTIPFRPIAR.I<br>K.LSGMTGTAATEAEFFDIYK.M<br>K.LGGNEEFRIEDELKMPAGPER.D<br>K.LGGNEEFR.I<br>K.AALVDAETWKIEK.S<br>R.TIREAQER.G<br>R.KQVVEYDVMNDQR.K<br>R.IDEEEFYKINIDK.F<br>R.HFDVQMIIGSVLHR.G<br>K.AAGGLVFLATERHESR.R<br>R.QFDVVDDATYAR.I<br>K.SDRQFDVVDDATYAR.I<br>K.TLDATGAADVANYGFTAVSVSPALFGSVK.G<br>R.LAAGFEISPEVQAR.A<br>R.HFAGQWVFGIADVNAQIDETAALLPOGAASR.H<br>R.ATPGSAILNTGSAGFYGVGLAVYSATK.F<br>K.AIFITGGSGIGR.A<br>R.VDVTVDHADR.A<br>R.IALDEAALDSELP.LR.R<br>R.VDVLTHDANGLSER.D<br>R.RFQWTHDPRDAITR.Q<br>K.LDHPPEWSNVYR.V<br>R.GLPDADADITIAAMAANPAYVERPFVETEK.G<br>R.QLFADAGLAPR.D<br>R.RGDAPSVAR.G<br>R.GFDLTFGVK.V<br>R.LTSGGAIDADAIEGDAVEAVVTGSGDLR.V<br>K.VTGPDDVTR.R<br>R.GPQVDELEIELDGMLSIGR.K<br>R.PALVPLTGGDDVLF.R.E<br>R.FGDLFAAPNLVATGPPSPK.M<br>R.YAPADJALVER.H<br>R.HGEPVTIDFLDPAAPGWLLGAK.R<br>R.VLLLDHAEVGGK.I<br>R.TPEDIAASLVR.A<br>K.LLAPVEHEPEDLALAQ.L<br>R.GFAAALSGEHSQNER.N<br>R.GALDLAALR.V<br>K.GRDLVSAQTGSGK.T<br>R.ALNQGVQIVGTGR.L<br>R.TLFSATIPKPIVQLAK.R<br>R.GYEALTPVQLQTEAEAK.G<br>R.GPAGPGNER.Y<br>R.HGSDIAYQAVTVAPADIEGAVNLLR.L<br>R.EFEDAVWR.L<br>R.ISTVGEDRGHGDIAQVTVAPADIEGAVNLLR.L<br>K.KGTAVIIVPYR.R<br>R.VAVLDEADEMLDMGFRDDLEILDATPETR.R<br>R.TANQDGEDDSGVAITPAPDPTWPPRR.D<br>R.INAEWMDAPTAADVQ.R<br>R.GHYSKNEIGAIR.I<br>K.TVAFGLAMADELIEDGRLPFATSPALIVAPTR.E<br>K.GTAVIIVPYR.R<br>K.AIGATVIGTVSTEAK.E<br>K.LPAAIDETAALLK.A<br>R.DVALDGPGRQVLR.Q<br>R.YKTDVAGHVR.E<br>R.QAVGLNYDIYHR.D<br>R.IVQAPSLFKLPAIDETAALLK.A<br>R.SYIEDELPSVLR.N<br>R.SVSASFPIVAPIR.C<br>R.NFASADLR.Q<br>R.EGGFQQLVLYR.D<br>K.AGVENGTAIEDPPGIR.E<br>R.FYDATFAIGKPPVDDK.G<br>R.EGGFQQLVLYLRDPSGNK.L<br>K.LIGATAHFVTSDDLEGPPIEQAVER.V<br>R.FPGLAGVQDAFPIAR.R<br>R.GGAEVILAR.Y<br>R.LTEWHGVPHYLPVSDANR.A<br>R.AEQESAILDV.MAR.G<br>R.YMQVLSSELSAR.L<br>R.WSTGNLAIDIVGVSNHEHLR.R<br>R.DVEAQVLR.A<br>R.DGIFLDSQYADLDSGR.F<br>R.VVYLVLR.D<br>R.FYDALGLVGAEEVIDER.G<br>K.KPLEIVELLEGPK.A<br>R.GWGTSTIIIGVAEAK.E<br>K.VQVGDNVVFFLGGIGLNVIQGAR.L<br>K.EIATRFQLVTR.N<br>K.IIGVDINPAR.E<br>K.IREDAPFQACYIGCVTTGVAVINTAK.V<br>R.KFGMTEFLNSK.G<br>R.EVAGVTSVVPDGHVPLTYPECR.Q |
| YP_616862 | Sala_1817 | preprotein translocase, SecA subunit                | 69.26%            | 58                      |                                                                                                                                                                                                                                                                                                                                                                                                                                                                                                                                                                                                                                                                                                                                                                                                                                                                                                                                                                                                                                                                                                                                                                                                                                                                                                                                                                                                                                                                                                                                                                                                                                                                                                                                                                                                                                                                                                                                                                                                                                                                                                                                                                                                                                                                                                                                                                                                                                                                                                                                                                                                                                                                                                                                                                                                                                                                                                                                                                                                                                                                                                                                                                                                                                                                                                                             |
| YP_616864 | Sala_1819 | hypothetical protein                                | 28.14%            | 3                       |                                                                                                                                                                                                                                                                                                                                                                                                                                                                                                                                                                                                                                                                                                                                                                                                                                                                                                                                                                                                                                                                                                                                                                                                                                                                                                                                                                                                                                                                                                                                                                                                                                                                                                                                                                                                                                                                                                                                                                                                                                                                                                                                                                                                                                                                                                                                                                                                                                                                                                                                                                                                                                                                                                                                                                                                                                                                                                                                                                                                                                                                                                                                                                                                                                                                                                                             |
| YP_616865 | Sala_1820 | short-chain dehydrogenase/reductase SDR             | 34.08%            | 4                       |                                                                                                                                                                                                                                                                                                                                                                                                                                                                                                                                                                                                                                                                                                                                                                                                                                                                                                                                                                                                                                                                                                                                                                                                                                                                                                                                                                                                                                                                                                                                                                                                                                                                                                                                                                                                                                                                                                                                                                                                                                                                                                                                                                                                                                                                                                                                                                                                                                                                                                                                                                                                                                                                                                                                                                                                                                                                                                                                                                                                                                                                                                                                                                                                                                                                                                                             |
| YP_616867 | Sala_1822 | heme exporter protein CcmA                          | 14.43%            | 2                       |                                                                                                                                                                                                                                                                                                                                                                                                                                                                                                                                                                                                                                                                                                                                                                                                                                                                                                                                                                                                                                                                                                                                                                                                                                                                                                                                                                                                                                                                                                                                                                                                                                                                                                                                                                                                                                                                                                                                                                                                                                                                                                                                                                                                                                                                                                                                                                                                                                                                                                                                                                                                                                                                                                                                                                                                                                                                                                                                                                                                                                                                                                                                                                                                                                                                                                                             |
| YP_616870 | Sala_1825 | transcriptional coactivator/pterin dehydratase      | 36.07%            | 3                       |                                                                                                                                                                                                                                                                                                                                                                                                                                                                                                                                                                                                                                                                                                                                                                                                                                                                                                                                                                                                                                                                                                                                                                                                                                                                                                                                                                                                                                                                                                                                                                                                                                                                                                                                                                                                                                                                                                                                                                                                                                                                                                                                                                                                                                                                                                                                                                                                                                                                                                                                                                                                                                                                                                                                                                                                                                                                                                                                                                                                                                                                                                                                                                                                                                                                                                                             |
| YP_616871 | Sala_1826 | arsenate reductase                                  | 35.96%            | 2                       |                                                                                                                                                                                                                                                                                                                                                                                                                                                                                                                                                                                                                                                                                                                                                                                                                                                                                                                                                                                                                                                                                                                                                                                                                                                                                                                                                                                                                                                                                                                                                                                                                                                                                                                                                                                                                                                                                                                                                                                                                                                                                                                                                                                                                                                                                                                                                                                                                                                                                                                                                                                                                                                                                                                                                                                                                                                                                                                                                                                                                                                                                                                                                                                                                                                                                                                             |
| YP_616874 | Sala_1829 | hypothetical protein                                | 32.66%            | 5                       |                                                                                                                                                                                                                                                                                                                                                                                                                                                                                                                                                                                                                                                                                                                                                                                                                                                                                                                                                                                                                                                                                                                                                                                                                                                                                                                                                                                                                                                                                                                                                                                                                                                                                                                                                                                                                                                                                                                                                                                                                                                                                                                                                                                                                                                                                                                                                                                                                                                                                                                                                                                                                                                                                                                                                                                                                                                                                                                                                                                                                                                                                                                                                                                                                                                                                                                             |
| YP_616876 | Sala_1831 | HI0933-like protein                                 | 21.14%            | 5                       |                                                                                                                                                                                                                                                                                                                                                                                                                                                                                                                                                                                                                                                                                                                                                                                                                                                                                                                                                                                                                                                                                                                                                                                                                                                                                                                                                                                                                                                                                                                                                                                                                                                                                                                                                                                                                                                                                                                                                                                                                                                                                                                                                                                                                                                                                                                                                                                                                                                                                                                                                                                                                                                                                                                                                                                                                                                                                                                                                                                                                                                                                                                                                                                                                                                                                                                             |
| YP_616877 | Sala_1832 | DEAD/DEAH box helicase-like protein                 | 49.18%            | 19                      |                                                                                                                                                                                                                                                                                                                                                                                                                                                                                                                                                                                                                                                                                                                                                                                                                                                                                                                                                                                                                                                                                                                                                                                                                                                                                                                                                                                                                                                                                                                                                                                                                                                                                                                                                                                                                                                                                                                                                                                                                                                                                                                                                                                                                                                                                                                                                                                                                                                                                                                                                                                                                                                                                                                                                                                                                                                                                                                                                                                                                                                                                                                                                                                                                                                                                                                             |
| YP_616878 | Sala_1833 | Alcohol dehydrogenase, zinc-binding                 | 24.39%            | 6                       |                                                                                                                                                                                                                                                                                                                                                                                                                                                                                                                                                                                                                                                                                                                                                                                                                                                                                                                                                                                                                                                                                                                                                                                                                                                                                                                                                                                                                                                                                                                                                                                                                                                                                                                                                                                                                                                                                                                                                                                                                                                                                                                                                                                                                                                                                                                                                                                                                                                                                                                                                                                                                                                                                                                                                                                                                                                                                                                                                                                                                                                                                                                                                                                                                                                                                                                             |
| YP_616879 | Sala_1834 | Carboxylesterase                                    | 12.41%            | 3                       |                                                                                                                                                                                                                                                                                                                                                                                                                                                                                                                                                                                                                                                                                                                                                                                                                                                                                                                                                                                                                                                                                                                                                                                                                                                                                                                                                                                                                                                                                                                                                                                                                                                                                                                                                                                                                                                                                                                                                                                                                                                                                                                                                                                                                                                                                                                                                                                                                                                                                                                                                                                                                                                                                                                                                                                                                                                                                                                                                                                                                                                                                                                                                                                                                                                                                                                             |
| YP_616881 | Sala_1836 | Glyoxalase/bleomycin resistance protein/dioxygenase | 43.65%            | 4                       |                                                                                                                                                                                                                                                                                                                                                                                                                                                                                                                                                                                                                                                                                                                                                                                                                                                                                                                                                                                                                                                                                                                                                                                                                                                                                                                                                                                                                                                                                                                                                                                                                                                                                                                                                                                                                                                                                                                                                                                                                                                                                                                                                                                                                                                                                                                                                                                                                                                                                                                                                                                                                                                                                                                                                                                                                                                                                                                                                                                                                                                                                                                                                                                                                                                                                                                             |
| YP_616882 | Sala_1837 | formyltetrahydrofolate deformylase                  | 49.31%            | 9                       |                                                                                                                                                                                                                                                                                                                                                                                                                                                                                                                                                                                                                                                                                                                                                                                                                                                                                                                                                                                                                                                                                                                                                                                                                                                                                                                                                                                                                                                                                                                                                                                                                                                                                                                                                                                                                                                                                                                                                                                                                                                                                                                                                                                                                                                                                                                                                                                                                                                                                                                                                                                                                                                                                                                                                                                                                                                                                                                                                                                                                                                                                                                                                                                                                                                                                                                             |
| YP_616883 | Sala_1838 | Glyoxalase/bleomycin resistance protein/dioxygenase | 21.09%            | 2                       |                                                                                                                                                                                                                                                                                                                                                                                                                                                                                                                                                                                                                                                                                                                                                                                                                                                                                                                                                                                                                                                                                                                                                                                                                                                                                                                                                                                                                                                                                                                                                                                                                                                                                                                                                                                                                                                                                                                                                                                                                                                                                                                                                                                                                                                                                                                                                                                                                                                                                                                                                                                                                                                                                                                                                                                                                                                                                                                                                                                                                                                                                                                                                                                                                                                                                                                             |
| YP_616884 | Sala_1839 | Alcohol dehydrogenase, zinc-binding                 | 58.92%            | 18                      |                                                                                                                                                                                                                                                                                                                                                                                                                                                                                                                                                                                                                                                                                                                                                                                                                                                                                                                                                                                                                                                                                                                                                                                                                                                                                                                                                                                                                                                                                                                                                                                                                                                                                                                                                                                                                                                                                                                                                                                                                                                                                                                                                                                                                                                                                                                                                                                                                                                                                                                                                                                                                                                                                                                                                                                                                                                                                                                                                                                                                                                                                                                                                                                                                                                                                                                             |

| Accession | Locus tag | Description                                             | Sequence coverage | No. peptides identified | List of peptides identified                                                                                                                                                                                                                                                                                                                                                                                                                                                                                                                                                                                                                                                                                                                                                                                                                                                                                                                                                                                                                                                                                                                                                                                                                                                                                                                                                                                                                                                                                                                                                                                                                                                                                                                                                                                                                                                                                                                                                                                                                                                                                                                                                                                                                                                                                                                                                                                                                                                                                                                                                                                                                                                                                                                                                                                                                                                                                                                                                                                                                                                                                                                                                                                                                                                                                                                                                                                                                                                             |
|-----------|-----------|---------------------------------------------------------|-------------------|-------------------------|-----------------------------------------------------------------------------------------------------------------------------------------------------------------------------------------------------------------------------------------------------------------------------------------------------------------------------------------------------------------------------------------------------------------------------------------------------------------------------------------------------------------------------------------------------------------------------------------------------------------------------------------------------------------------------------------------------------------------------------------------------------------------------------------------------------------------------------------------------------------------------------------------------------------------------------------------------------------------------------------------------------------------------------------------------------------------------------------------------------------------------------------------------------------------------------------------------------------------------------------------------------------------------------------------------------------------------------------------------------------------------------------------------------------------------------------------------------------------------------------------------------------------------------------------------------------------------------------------------------------------------------------------------------------------------------------------------------------------------------------------------------------------------------------------------------------------------------------------------------------------------------------------------------------------------------------------------------------------------------------------------------------------------------------------------------------------------------------------------------------------------------------------------------------------------------------------------------------------------------------------------------------------------------------------------------------------------------------------------------------------------------------------------------------------------------------------------------------------------------------------------------------------------------------------------------------------------------------------------------------------------------------------------------------------------------------------------------------------------------------------------------------------------------------------------------------------------------------------------------------------------------------------------------------------------------------------------------------------------------------------------------------------------------------------------------------------------------------------------------------------------------------------------------------------------------------------------------------------------------------------------------------------------------------------------------------------------------------------------------------------------------------------------------------------------------------------------------------------------------------|
|           |           |                                                         |                   |                         | R.EDAPFQACYIGCVTTGVGAVINTAK.V<br>K.IVDMYMTGK.I<br>K.IIGVDINPAREEWGR.K<br>K.IEIDPMITHVWGLEEINK.G<br>K.QQPIFHYMGCTSFNFTVPEIAVAK.I<br>K.GFDLMHAGESIR.S<br>K.FGMTEFLNSK.G<br>R.KFGMTEFLNSK.G<br>K.TNLCTAIR.A<br>K.IEIDPMITHVWGLEEINKGFDLMHAGESIR.S<br>R.GALNALLLSEEAR.A<br>R.LLANVLLR.D<br>K.VGLVLTGGNIDTR.L<br>R.TPTLHSQTLSELVGAEVWLK.F<br>R.LGVIPVITVMPSTTPQVK.V<br>K.FENLQFTAAFK.E<br>K.FDDAYAHAR.E<br>R.LQDRPGALFK.V<br>R.KVGLVLTGGNIDTR.L<br>K.TVVEGAGAAGLAAMLHPDEFAGR.K<br>K.QVNIIEIYHQR.I<br>R.DREHLDLVTALR.D<br>R.AVSLLLQIEK.T<br>K.VSQTAGHGATVILHGEK.F<br>R.GVIAASAGNHAQGLAYHGK.R<br>K.VSQTAGHGATVILHGEKFDAYAHAR.E<br>R.VNGATLPVAVSLDQFYADVQK.V<br>R.HGGAVAVSPADAAR.D<br>K.LDTDKVFEAVSGGAASWQMLNR.W<br>R.KDGLLAIDEAR.V<br>R.AGHHLTVYNR.T<br>K.MVNQIATAGVLQGLSEALR.F<br>R.MVHIGGGPAGQTK.M<br>K.GSLFIDHTVTSAR.I<br>R.LAFGSDVPEESANFAGLAAAIR.T<br>R.TDAAGQPFQGWHPPEAVSR.E<br>R.FTGLVIDGEGK.V<br>K.VVASMQPVHQTSDR.L<br>K.QLAVRILSYGGIDINMAIAGSEPTPWLYDDR.L<br>K.LYLDGALSKR.G<br>R.FPTAALDAAVSNRPVWLER.V<br>K.LLEQGITAIADMGTTIAEWQAYR.R<br>R.TAAYGAFAER.I<br>R.FQVAIHAIIDAANAELAAIADLADLPGERR.W<br>R.YAENPEMPWIIGR.G<br>R.VDGHAGWANSAMAAMAAK.V<br>R.MTPLETWIGCYR.Y<br>R.LQDGSIAFPDALAGIVDAVDGRVEICDGGITR.G<br>R.AADIGATAIMVSNHGR.Q<br>R.AAANAGTMAGISSLATIGLAEAGALDGP.K<br>K.LSHDIGPVSITGMVAVAPK.Q<br>K.VAVQPTLVSHESGFYAGVWSSLPDSPAYK.F<br>K.AVDTLDPVTVFLGASF.<br>K.SALGIGNLLWAGIGDTR.V<br>R.ETDITGTTGGNGR.H<br>R.VLSAEPEEVR.V<br>R.TVQALEDALGHK.T<br>R.IGVNAGSLEK.D<br>R.IGVNAGSLEKDLLEK.Y<br>R.LLAGTTPPALADAFAGR.G<br>R.GVAHDFSADEAGAR.I<br>R.MMDEWTVMRVGDALTR.L<br>R.ADLPLIAEFIR.D<br>R.YPAEYTNPENSIGYLAR.V<br>K.LAVLSEIKA.<br>R.TLTHVSAGQWR.F<br>K.TFVYTPHAK.K<br>K.QARYPAEYTNPENSIGYLAR.V<br>K.KLELILAPMNAEIHAIATK.G<br>K.VAAYLFGYLR.R<br>R.NQAIQFPLVETATQAEMLR.L<br>R.MTFADVWVDSAR.L<br>K.DGSNLWMAVIR.E<br>K.AEFLGGFGR.R<br>R.LGPDVGGLSIAQSFVHQNR.I<br>R.ITEGAEIQMR.K<br>R.HEWEALLK.E<br>R.DGVDSWLNLR.K<br>R.AMQVHGGIGYSR.H<br>R.TAEQELDLVR.L<br>R.ALTDLLSGTATLARPGLLAK.L<br>R.LLETEAPESER.A<br>R.ARPVPSQAPAPTGEPTNR.E<br>R.SDATLTFPLAIMR.Y<br>R.IAEGTSLVR.R<br>R.SIEAALADGREWLAVGR.F<br>R.SIEAALADGR.E<br>R.LSPAWEAFVINDTR.A<br>R.VVDADGNPLPTGEVEVTVSR.S<br>K.VILYGAAPLLELR.Q<br>K.MVFAFGFEGELADQLAGR.L<br>R.QCIVQFQAQFIQAYGMTETTGTISMLPPEDHPAGNKR.M<br>R.IEEDIIAWAR.E<br>K.AAADDAGLFAER.R<br>R.LVPGAPLILYGPFIPEPDVPTAASNLDFDANLR.A<br>R.AEAGLANLAPPLADAAAPDWPTGR.A<br>K.IIEENMADEHPATFGR.M<br>K.AVLQJFIALR.S<br>R.SGPIGLPLSESETVR.H<br>R.ARLDETLAAR.K<br>R.ALAYILSHGADGLK.Q<br>K.TFSTPHGGGPGSGPVVLSALAPYGLPFVAV.Y<br>K.GLAEGFSTLDIAK.G<br>R.KPVLAWEGDL.<br>K.QVAEDAVLNANYL.R.S<br>R.VILVPEAHGNTNATAAFAGFTVEDIPATK.E<br>R.RVILVPEAHGNTNATAAFAGFTVEDIPATK.E<br>R.SLEDVLDAPPAAGPCMHAEALFSDK.G<br>R.MPGFADVHPLQVQETVQALAVINELAVWLK.L<br>R.IDETLAAR.K<br>R.VRPGDLGIDAMHINLHK.T<br>R.PEMNAAGADDNVTFTGNR.A<br>R.LGPDVAGVMITNPTCGLFER.D<br>K.LTGMVGVAMSPK.A<br>K.AISDAVHAAGGYVCDGANFNATVGR.V<br>R.LYPTDAALENGLVAVTETVEDIAFAAALK.E<br>R.AAMLGAIASSIDELFADVPAGAR.L<br>R.LEPDTWAALAGR.I<br>R.HVPSVDHLIQR.G<br>K.VPVSVMNDSFFNEFTLLPTAAR.P<br>R.AAGDGFPLGAGYR.H<br>R.LAEQDILGGVSLGR.L<br>R.GEFLATYTPQPEIAQGLQMLFEFQSQVAR.L<br>R.LDGPAGLPMHASELAVR.H<br>K.ALLSTGLHPHYR.S<br>R.IDDMITLAEACQTAGALLIAVTEPVALGLIK.S<br>R.GFVTLSTR.E<br>R.DVLDVGGDPR.L<br>K.VPVSVMNDSFFNEFTLLPTAARPVHR.L<br>R.YSGDYALHFLNPR.Q<br>R.AVEQGLAKDNPADLAR.Y<br>R.MTLADKQLDALMDAK.A<br>K.SQDALMDAK.A<br>K.AASDVYAVDGTVTEAGNQLPEEDPALVNSDPEEGWFFR.M<br>R.LEAGLPLYHDLDESIDPEADLAFASK.R<br>R.VGLVIDKLPVR.E<br>R.ILGLHLDGSPR.K |
| YP_616887 | Sala_1842 | threonine dehydratase                                   | 47.36%            | 16                      |                                                                                                                                                                                                                                                                                                                                                                                                                                                                                                                                                                                                                                                                                                                                                                                                                                                                                                                                                                                                                                                                                                                                                                                                                                                                                                                                                                                                                                                                                                                                                                                                                                                                                                                                                                                                                                                                                                                                                                                                                                                                                                                                                                                                                                                                                                                                                                                                                                                                                                                                                                                                                                                                                                                                                                                                                                                                                                                                                                                                                                                                                                                                                                                                                                                                                                                                                                                                                                                                                         |
| YP_616888 | Sala_1843 | 6-phosphogluconate dehydrogenase, NAD-binding           | 42.81%            | 8                       |                                                                                                                                                                                                                                                                                                                                                                                                                                                                                                                                                                                                                                                                                                                                                                                                                                                                                                                                                                                                                                                                                                                                                                                                                                                                                                                                                                                                                                                                                                                                                                                                                                                                                                                                                                                                                                                                                                                                                                                                                                                                                                                                                                                                                                                                                                                                                                                                                                                                                                                                                                                                                                                                                                                                                                                                                                                                                                                                                                                                                                                                                                                                                                                                                                                                                                                                                                                                                                                                                         |
| YP_616889 | Sala_1844 | Amidohydrolase 3                                        | 43.14%            | 13                      |                                                                                                                                                                                                                                                                                                                                                                                                                                                                                                                                                                                                                                                                                                                                                                                                                                                                                                                                                                                                                                                                                                                                                                                                                                                                                                                                                                                                                                                                                                                                                                                                                                                                                                                                                                                                                                                                                                                                                                                                                                                                                                                                                                                                                                                                                                                                                                                                                                                                                                                                                                                                                                                                                                                                                                                                                                                                                                                                                                                                                                                                                                                                                                                                                                                                                                                                                                                                                                                                                         |
| YP_616891 | Sala_1846 | (S)-2-hydroxy-acid oxidase                              | 20.94%            | 3                       |                                                                                                                                                                                                                                                                                                                                                                                                                                                                                                                                                                                                                                                                                                                                                                                                                                                                                                                                                                                                                                                                                                                                                                                                                                                                                                                                                                                                                                                                                                                                                                                                                                                                                                                                                                                                                                                                                                                                                                                                                                                                                                                                                                                                                                                                                                                                                                                                                                                                                                                                                                                                                                                                                                                                                                                                                                                                                                                                                                                                                                                                                                                                                                                                                                                                                                                                                                                                                                                                                         |
| YP_616892 | Sala_1847 | hypothetical protein                                    | 27.49%            | 3                       |                                                                                                                                                                                                                                                                                                                                                                                                                                                                                                                                                                                                                                                                                                                                                                                                                                                                                                                                                                                                                                                                                                                                                                                                                                                                                                                                                                                                                                                                                                                                                                                                                                                                                                                                                                                                                                                                                                                                                                                                                                                                                                                                                                                                                                                                                                                                                                                                                                                                                                                                                                                                                                                                                                                                                                                                                                                                                                                                                                                                                                                                                                                                                                                                                                                                                                                                                                                                                                                                                         |
| YP_616893 | Sala_1848 | 1-hydroxy-2-methyl-2-(E)-butenyl 4-diphosphate synthase | 18.54%            | 6                       |                                                                                                                                                                                                                                                                                                                                                                                                                                                                                                                                                                                                                                                                                                                                                                                                                                                                                                                                                                                                                                                                                                                                                                                                                                                                                                                                                                                                                                                                                                                                                                                                                                                                                                                                                                                                                                                                                                                                                                                                                                                                                                                                                                                                                                                                                                                                                                                                                                                                                                                                                                                                                                                                                                                                                                                                                                                                                                                                                                                                                                                                                                                                                                                                                                                                                                                                                                                                                                                                                         |
| YP_616894 | Sala_1849 | hypothetical protein                                    | 10.75%            | 2                       |                                                                                                                                                                                                                                                                                                                                                                                                                                                                                                                                                                                                                                                                                                                                                                                                                                                                                                                                                                                                                                                                                                                                                                                                                                                                                                                                                                                                                                                                                                                                                                                                                                                                                                                                                                                                                                                                                                                                                                                                                                                                                                                                                                                                                                                                                                                                                                                                                                                                                                                                                                                                                                                                                                                                                                                                                                                                                                                                                                                                                                                                                                                                                                                                                                                                                                                                                                                                                                                                                         |
| YP_616895 | Sala_1850 | GCN5-related N-acetyltransferase                        | 17.50%            | 2                       |                                                                                                                                                                                                                                                                                                                                                                                                                                                                                                                                                                                                                                                                                                                                                                                                                                                                                                                                                                                                                                                                                                                                                                                                                                                                                                                                                                                                                                                                                                                                                                                                                                                                                                                                                                                                                                                                                                                                                                                                                                                                                                                                                                                                                                                                                                                                                                                                                                                                                                                                                                                                                                                                                                                                                                                                                                                                                                                                                                                                                                                                                                                                                                                                                                                                                                                                                                                                                                                                                         |
| YP_616903 | Sala_1858 | transcriptional regulator, MarR family                  | 42.86%            | 6                       |                                                                                                                                                                                                                                                                                                                                                                                                                                                                                                                                                                                                                                                                                                                                                                                                                                                                                                                                                                                                                                                                                                                                                                                                                                                                                                                                                                                                                                                                                                                                                                                                                                                                                                                                                                                                                                                                                                                                                                                                                                                                                                                                                                                                                                                                                                                                                                                                                                                                                                                                                                                                                                                                                                                                                                                                                                                                                                                                                                                                                                                                                                                                                                                                                                                                                                                                                                                                                                                                                         |
| YP_616904 | Sala_1859 | acyl-CoA dehydrogenase-like protein                     | 29.47%            | 10                      |                                                                                                                                                                                                                                                                                                                                                                                                                                                                                                                                                                                                                                                                                                                                                                                                                                                                                                                                                                                                                                                                                                                                                                                                                                                                                                                                                                                                                                                                                                                                                                                                                                                                                                                                                                                                                                                                                                                                                                                                                                                                                                                                                                                                                                                                                                                                                                                                                                                                                                                                                                                                                                                                                                                                                                                                                                                                                                                                                                                                                                                                                                                                                                                                                                                                                                                                                                                                                                                                                         |
| YP_616905 | Sala_1860 | aminoglycoside phosphotransferase                       | 14.09%            | 4                       |                                                                                                                                                                                                                                                                                                                                                                                                                                                                                                                                                                                                                                                                                                                                                                                                                                                                                                                                                                                                                                                                                                                                                                                                                                                                                                                                                                                                                                                                                                                                                                                                                                                                                                                                                                                                                                                                                                                                                                                                                                                                                                                                                                                                                                                                                                                                                                                                                                                                                                                                                                                                                                                                                                                                                                                                                                                                                                                                                                                                                                                                                                                                                                                                                                                                                                                                                                                                                                                                                         |
| YP_616908 | Sala_1863 | glutathione S-transferase-like protein                  | 19.90%            | 4                       |                                                                                                                                                                                                                                                                                                                                                                                                                                                                                                                                                                                                                                                                                                                                                                                                                                                                                                                                                                                                                                                                                                                                                                                                                                                                                                                                                                                                                                                                                                                                                                                                                                                                                                                                                                                                                                                                                                                                                                                                                                                                                                                                                                                                                                                                                                                                                                                                                                                                                                                                                                                                                                                                                                                                                                                                                                                                                                                                                                                                                                                                                                                                                                                                                                                                                                                                                                                                                                                                                         |
| YP_616910 | Sala_1865 | AMP-dependent synthetase and ligase                     | 22.35%            | 6                       |                                                                                                                                                                                                                                                                                                                                                                                                                                                                                                                                                                                                                                                                                                                                                                                                                                                                                                                                                                                                                                                                                                                                                                                                                                                                                                                                                                                                                                                                                                                                                                                                                                                                                                                                                                                                                                                                                                                                                                                                                                                                                                                                                                                                                                                                                                                                                                                                                                                                                                                                                                                                                                                                                                                                                                                                                                                                                                                                                                                                                                                                                                                                                                                                                                                                                                                                                                                                                                                                                         |
| YP_616911 | Sala_1866 | protein of unknown function DUF938                      | 19.29%            | 3                       |                                                                                                                                                                                                                                                                                                                                                                                                                                                                                                                                                                                                                                                                                                                                                                                                                                                                                                                                                                                                                                                                                                                                                                                                                                                                                                                                                                                                                                                                                                                                                                                                                                                                                                                                                                                                                                                                                                                                                                                                                                                                                                                                                                                                                                                                                                                                                                                                                                                                                                                                                                                                                                                                                                                                                                                                                                                                                                                                                                                                                                                                                                                                                                                                                                                                                                                                                                                                                                                                                         |
| YP_616912 | Sala_1867 | Glycine dehydrogenase (decarboxylating)                 | 62.28%            | 19                      |                                                                                                                                                                                                                                                                                                                                                                                                                                                                                                                                                                                                                                                                                                                                                                                                                                                                                                                                                                                                                                                                                                                                                                                                                                                                                                                                                                                                                                                                                                                                                                                                                                                                                                                                                                                                                                                                                                                                                                                                                                                                                                                                                                                                                                                                                                                                                                                                                                                                                                                                                                                                                                                                                                                                                                                                                                                                                                                                                                                                                                                                                                                                                                                                                                                                                                                                                                                                                                                                                         |
| YP_616913 | Sala_1868 | Glycine dehydrogenase (decarboxylating)                 | 55.97%            | 14                      |                                                                                                                                                                                                                                                                                                                                                                                                                                                                                                                                                                                                                                                                                                                                                                                                                                                                                                                                                                                                                                                                                                                                                                                                                                                                                                                                                                                                                                                                                                                                                                                                                                                                                                                                                                                                                                                                                                                                                                                                                                                                                                                                                                                                                                                                                                                                                                                                                                                                                                                                                                                                                                                                                                                                                                                                                                                                                                                                                                                                                                                                                                                                                                                                                                                                                                                                                                                                                                                                                         |
| YP_616914 | Sala_1869 | hypothetical protein                                    | 10.58%            | 2                       |                                                                                                                                                                                                                                                                                                                                                                                                                                                                                                                                                                                                                                                                                                                                                                                                                                                                                                                                                                                                                                                                                                                                                                                                                                                                                                                                                                                                                                                                                                                                                                                                                                                                                                                                                                                                                                                                                                                                                                                                                                                                                                                                                                                                                                                                                                                                                                                                                                                                                                                                                                                                                                                                                                                                                                                                                                                                                                                                                                                                                                                                                                                                                                                                                                                                                                                                                                                                                                                                                         |
| YP_616915 | Sala_1870 | glycine cleavage system H protein                       | 44.72%            | 3                       |                                                                                                                                                                                                                                                                                                                                                                                                                                                                                                                                                                                                                                                                                                                                                                                                                                                                                                                                                                                                                                                                                                                                                                                                                                                                                                                                                                                                                                                                                                                                                                                                                                                                                                                                                                                                                                                                                                                                                                                                                                                                                                                                                                                                                                                                                                                                                                                                                                                                                                                                                                                                                                                                                                                                                                                                                                                                                                                                                                                                                                                                                                                                                                                                                                                                                                                                                                                                                                                                                         |
| YP_616916 | Sala_1871 | glycine cleavage system T protein                       | 56.15%            | 10                      |                                                                                                                                                                                                                                                                                                                                                                                                                                                                                                                                                                                                                                                                                                                                                                                                                                                                                                                                                                                                                                                                                                                                                                                                                                                                                                                                                                                                                                                                                                                                                                                                                                                                                                                                                                                                                                                                                                                                                                                                                                                                                                                                                                                                                                                                                                                                                                                                                                                                                                                                                                                                                                                                                                                                                                                                                                                                                                                                                                                                                                                                                                                                                                                                                                                                                                                                                                                                                                                                                         |

| Accession | Locus tag | Description                                    | Sequence coverage | No. peptides identified | List of peptides identified                                                                                                                                                                                                                                                                                                                                                                                                                                                                                                                                                                                                                                                                                                                                                                                                                                                                                                                                                                                                                                                                                                                                                                                                                                                                                                                                                                                                                                                                                                                                                                                                                                                                                                                                                                                                                                                                                                                                                                                                                                                                                                                                                                                                                                                                                                                                                                                                                                                                                                                                                                                                                                                                                                                                                                                                                                                                                                                                                                                                                                                                                                                                                                                                                                                                                                                                                                                                                                                                                                                            |
|-----------|-----------|------------------------------------------------|-------------------|-------------------------|--------------------------------------------------------------------------------------------------------------------------------------------------------------------------------------------------------------------------------------------------------------------------------------------------------------------------------------------------------------------------------------------------------------------------------------------------------------------------------------------------------------------------------------------------------------------------------------------------------------------------------------------------------------------------------------------------------------------------------------------------------------------------------------------------------------------------------------------------------------------------------------------------------------------------------------------------------------------------------------------------------------------------------------------------------------------------------------------------------------------------------------------------------------------------------------------------------------------------------------------------------------------------------------------------------------------------------------------------------------------------------------------------------------------------------------------------------------------------------------------------------------------------------------------------------------------------------------------------------------------------------------------------------------------------------------------------------------------------------------------------------------------------------------------------------------------------------------------------------------------------------------------------------------------------------------------------------------------------------------------------------------------------------------------------------------------------------------------------------------------------------------------------------------------------------------------------------------------------------------------------------------------------------------------------------------------------------------------------------------------------------------------------------------------------------------------------------------------------------------------------------------------------------------------------------------------------------------------------------------------------------------------------------------------------------------------------------------------------------------------------------------------------------------------------------------------------------------------------------------------------------------------------------------------------------------------------------------------------------------------------------------------------------------------------------------------------------------------------------------------------------------------------------------------------------------------------------------------------------------------------------------------------------------------------------------------------------------------------------------------------------------------------------------------------------------------------------------------------------------------------------------------------------------------------------|
| YP_616917 | Sala_1872 | NAD-dependent epimerase/dehydratase            | 29.77%            | 4                       | R.ENAGLFDVSHMGQLSLGEGVAK.A<br>R.EHLPDDITLHNHEDYGLLALQGP.K.A<br>K.ALETLPVGDLSALKPGR.M<br>R.LVFEADLVFHQAMPATWNGHAIATR.S<br>R.LEAGLPLYGHDLDESIDPVEADLFAISK.R<br>.MHEDDEIPIETATLPDADWHR.A<br>K.FELDGNTEIGVVTSGGFAPSVGAPIAMGYVPTGLSEPGTAAAEVR.G<br>R.LGEGLATIAAPLADALLHGSFR.R<br>R.AVDHDLVLAEEAGR.A<br>R.AVIAHFGATPLTLAR.R<br>R.RPVDGLAPHHK.D<br>K.NLYHHPQLAAEAGANK.V<br>R.TLGGFSAEIAAAER.E<br>R.LTHSIEVAQIGR.G<br>R.ELVRDQIGVMVNDVIAATAANVADAGVASAEVR.A<br>R.AETVPASSPPANPPTSAAVK.A<br>R.LASNNNDATALLDAGR.A<br>R.DLLGQDDAQR.D<br>R.ASISLEDYR.A<br>R.AIQLLTQQLR.A<br>R.AALGFLLR.A<br>R.VSVVATGIDGTGEAAQAPATR.S<br>R.FELDPDANITWGSFNDSLDDGK.I<br>R.SADAGIAELQHDVDTLIVPNQLFLVANPNITFK.E<br>R.VEGDFIVANTDAQALNASPAER.R<br>R.IQLGTQITQGLGAGSRPEVGR.A<br>K.AMMGTGEAEGDGR.A<br>R.IAVIGVGGAGGNAIANMIAAR.V<br>K.EAFTMADEVQQVGR.G<br>R.GAGTSDGDEKGDVADIPR.F<br>R.GITDLMMVPLINLDFADV.R.S<br>K.AIANPLLDGVMAGAK.G<br>R.SIGGGTLFER.M<br>R.LMEVDEANHIR.E<br>R.GILTVGVTKPFMFEGAR.R<br>R.YTHSGLVTSVIAIDKELTK.Q<br>R.DDSNYGNPISR.D<br>R.DALGPWQDFDR.L<br>K.GVADALESR.G<br>R.LAEAKPDVFNALHGVGPGEDTVQGLMDLMGR.Y<br>R.ELTVAVLGDALAVTEL.R.V<br>R.AVGMDYAEIYELVER.I<br>R.MKDLALQHR.L<br>K.YTDGLTEHVCADVPDDVAQR.M<br>K.SGFYDYDAK.Y<br>R.AVGMDYAEIYELVER.I<br>K.LTPQAPLAPLWFK.S<br>R.HSELPEGAVVGGATFR.G<br>R.DLDPAPVPMALGLSNLIVR.D<br>K.HTNFLINTGDATSADIEALGEEVRR.R<br>R.DAGIAGMEFLR.S<br>K.SGGAADWLFEPK.D<br>K.HTNFLINTGDATSADIEALGEEVRR.R<br>R.KTLALADLGYTYR.H<br>R.GLMVGGAQVSEK.H<br>K.TLALADLGYTYR.H<br>K.SGIELQWEIQR.V<br>R.QANVVDADALAASLAASIK.A<br>K.TTTSVAALLDAGGIDPTVINGIINNYGSNAR.L<br>R.QGSSDIADSYVVEGLR.K<br>K.STVAIAGTHGK.T<br>R.HNVQNALAAVAALHMGVPEDEK.I<br>R.GTNVTPGPDGNR.F<br>K.VAIGHAPENVGVAVVVSTAVK.R<br>K.VGEIVTDEGVVTVDDYAHHPVEIR.A<br>K.RGNPEVEAALQQR.I<br>R.RAEMLAELMR.L<br>R.LGASDWMVVEADESDGSFLR.L<br>R.IITYGFSQAQDVR.G<br>R.VVAVVQPHR.F<br>R.GNPEVEAALQQR.I<br>K.MAAGLASAVEGAA.<br>K.IVSGFNGFAGVK.R<br>R.VIHEQNAVLGR.V<br>R.LLVVGGSLGATVLEVVPAAIAMPLR.A<br>R.EEGFPILLEDGIFR.L<br>R.VDAVAVYHIQR.Y<br>R.DLADLVESFAAPMMDVIR.V<br>R.AASGPLGLWK.G<br>R.AASGIAAARR.E<br>K.IPGAPAELETHVLPAGR.A<br>R.DQVAIATDDDDPSK.M<br>R.VLGLDDEAIFR.G<br>R.SSLATVEALASAGVYTAWDDREAR.D<br>R.DAHVPVIGDIEFAEAR.S<br>K.AVGGLDPAAGLAFAPMPLTGR.G<br>R.VADSAAALNLTASR.A<br>K.GSNSVGLSHVVTALINGDY.<br>K.ELGPGGEAYHAGLAAPLVAAGVQFALLVGEEMAPLAK.A<br>R.HPSTADFGIFEMGPHHAGELALTR.I<br>R.LGLLIRPDAVLUK.G<br>R.IDFAHVPAPHDATAR.L<br>R.IAVPGHILVIDESYANANPASMATIGQLAGESADR.K<br>K.SYNNHVGVLPLSLAR.M<br>K.GENADGHFSIDK.A<br>K.GEIFFELGEPGTAIPDPSPHYAR.L<br>K.EALFALDR.F<br>R.TPTQLQLLVAAGDVTHK.V<br>K.VDGAHVADANPR.R<br>R.VLTVQAGEALR.L<br>K.VAPGTLFGAFVGER.F<br>R.FNGEDFFPDVAVAGAVAVVVARPDAK.V<br>K.GHECQQLVGR.G<br>R.VIPFDVSVAREEAA.<br>R.LAALLDDWAGPNPVVTGLAIDHR.K<br>R.AAIAAAIAAAR.A<br>R.DAIAAAAAPGAQVIGDRR.A<br>R.SGAPYVDYAHYTPDAIEAALDRLPHATGR.L<br>R.LLIVFAGGDRDQAK.R<br>R.HVDATFGAGGYTR.A<br>R.HDPVLLVEIAALAIAPGER.H<br>R.FSYTEPYTLDDSGR.F<br>R.VGDVGATFVGSGR.R<br>R.NNVPLNADGQR.V<br>R.DRVGVDGATFVGSGR.R<br>R.TSLDIGNTRVLLK.G<br>R.DAEATGSLRPGTIVGTAGNTGIGLALVGNALGYK.T<br>K.AEGSSVAEGIQNR.I<br>R.YLSTLYNPEWLAAR.G<br>K.TIIVMPDNQSAEK.M<br>R.ITANLEGAPIOTQFR.I<br>R.ISDAEGLAVR.R<br>R.IAETDNAIWANQFDNIANR.K<br>R.ALGAELVLPAPFANPFGHVHTSR.R<br>K.AHISGTAEEIWAQMGR.I<br>R.IAETDNAIWANQFDNIANR.K.A<br>R.IDGFTCAAGTGGTIGTGLGLK.A<br>R.IATLDSGFR.Y<br>R.AALYVVR.D<br>K.GPSEATGCEIWGK.C<br>R.LLDEGLCLGLSSGINVAGAMALAR.Q<br>R.KAHISGTAEEIWAQMGR.I<br>R.AEVEWTDQTR.I<br>R.AELLDLAAEAEEGHADAEEALTEQAGSR.G<br>R.VLTDGIGSIDVSNTSADHAVITDPLTVER.I<br>R.SGGFVYAPGLR.A<br>R.GPAVLFGSQAIGGAVNLFDR.R |
| YP_616918 | Sala_1873 | Deoxyguanosinetriphosphate triphosphohydrolase | 19.74%            | 4                       | R.LVFEADLVFHQAMPATWNGHAIATR.S<br>R.LEAGLPLYGHDLDESIDPVEADLFAISK.R<br>.MHEDDEIPIETATLPDADWHR.A<br>K.FELDGNTEIGVVTSGGFAPSVGAPIAMGYVPTGLSEPGTAAAEVR.G<br>R.LGEGLATIAAPLADALLHGSFR.R<br>R.AVDHDLVLAEEAGR.A<br>R.AVIAHFGATPLTLAR.R<br>R.RPVDGLAPHHK.D<br>K.NLYHHPQLAAEAGANK.V<br>R.TLGGFSAEIAAAER.E<br>R.LTHSIEVAQIGR.G<br>R.ELVRDQIGVMVNDVIAATAANVADAGVASAEVR.A<br>R.AETVPASSPPANPPTSAAVK.A<br>R.LASNNNDATALLDAGR.A<br>R.DLLGQDDAQR.D<br>R.ASISLEDYR.A<br>R.AIQLLTQQLR.A<br>R.AALGFLLR.A<br>R.VSVVATGIDGTGEAAQAPATR.S<br>R.FELDPDANITWGSFNDSLDDGK.I<br>R.SADAGIAELQHDVDTLIVPNQLFLVANPNITFK.E<br>R.VEGDFIVANTDAQALNASPAER.R<br>R.IQLGTQITQGLGAGSRPEVGR.A<br>K.AMMGTGEAEGDGR.A<br>R.IAVIGVGGAGGNAIANMIAAR.V<br>K.EAFTMADEVQQVGR.G<br>R.GAGTSDGDEKGDVADIPR.F<br>R.GITDLMMVPLINLDFADV.R.S<br>K.AIANPLLDGVMAGAK.G<br>R.SIGGGTLFER.M<br>R.LMEVDEANHIR.E<br>R.GILTVGVTKPFMFEGAR.R<br>R.YTHSGLVTSVIAIDKELTK.Q<br>R.DDSNYGNPISR.D<br>R.DALGPWQDFDR.L<br>K.GVADALESR.G<br>R.LAEAKPDVFNALHGVGPGEDTVQGLMDLMGR.Y<br>R.ELTVAVLGDALAVTEL.R.V<br>R.AVGMDYAEIYELVER.I<br>R.MKDLALQHR.L<br>K.YTDGLTEHVCADVPDDVAQR.M<br>K.SGFYDYDAK.Y<br>R.AVGMDYAEIYELVER.I<br>K.LTPQAPLAPLWFK.S<br>R.HSELPEGAVVGGATFR.G<br>R.DLDPAPVPMALGLSNLIVR.D<br>K.HTNFLINTGDATSADIEALGEEVRR.R<br>R.DAGIAGMEFLR.S<br>K.SGGAADWLFEPK.D<br>K.HTNFLINTGDATSADIEALGEEVRR.R<br>R.KTLALADLGYTYR.H<br>R.GLMVGGAQVSEK.H<br>K.TLALADLGYTYR.H<br>K.SGIELQWEIQR.V<br>R.QANVVDADALAASLAASIK.A<br>K.TTTSVAALLDAGGIDPTVINGIINNYGSNAR.L<br>R.QGSSDIADSYVVEGLR.K<br>K.STVAIAGTHGK.T<br>R.HNVQNALAAVAALHMGVPEDEK.I<br>R.GTNVTPGPDGNR.F<br>K.VAIGHAPENVGVAVVVSTAVK.R<br>K.VGEIVTDEGVVTVDDYAHHPVEIR.A<br>K.RGNPEVEAALQQR.I<br>R.RAEMLAELMR.L<br>R.LGASDWMVVEADESDGSFLR.L<br>R.IITYGFSQAQDVR.G<br>R.VVAVVQPHR.F<br>R.GNPEVEAALQQR.I<br>K.MAAGLASAVEGAA.<br>K.IVSGFNGFAGVK.R<br>R.VIHEQNAVLGR.V<br>R.LLVVGGSLGATVLEVVPAAIAMPLR.A<br>R.EEGFPILLEDGIFR.L<br>R.VDAVAVYHIQR.Y<br>R.DLADLVESFAAPMMDVIR.V<br>R.AASGPLGLWK.G<br>R.AASGIAAARR.E<br>K.IPGAPAELETHVLPAGR.A<br>R.DQVAIATDDDDPSK.M<br>R.VLGLDDEAIFR.G<br>R.SSLATVEALASAGVYTAWDDREAR.D<br>R.DAHVPVIGDIEFAEAR.S<br>K.AVGGLDPAAGLAFAPMPLTGR.G<br>R.VADSAAALNLTASR.A<br>K.GSNSVGLSHVVTALINGDY.<br>K.ELGPGGEAYHAGLAAPLVAAGVQFALLVGEEMAPLAK.A<br>R.HPSTADFGIFEMGPHHAGELALTR.I<br>R.LGLLIRPDAVLUK.G<br>R.IDFAHVPAPHDATAR.L<br>R.IAVPGHILVIDESYANANPASMATIGQLAGESADR.K<br>K.SYNNHVGVLPLSLAR.M<br>K.GENADGHFSIDK.A<br>K.GEIFFELGEPGTAIPDPSPHYAR.L<br>K.EALFALDR.F<br>R.TPTQLQLLVAAGDVTHK.V<br>K.VDGAHVADANPR.R<br>R.VLTVQAGEALR.L<br>K.VAPGTLFGAFVGER.F<br>R.FNGEDFFPDVAVAGAVAVVVARPDAK.V<br>K.GHECQQLVGR.G<br>R.VIPFDVSVAREEAA.<br>R.LAALLDDWAGPNPVVTGLAIDHR.K<br>R.AAIAAAIAAAR.A<br>R.DAIAAAAAPGAQVIGDRR.A<br>R.SGAPYVDYAHYTPDAIEAALDRLPHATGR.L<br>R.LLIVFAGGDRDQAK.R<br>R.HVDATFGAGGYTR.A<br>R.HDPVLLVEIAALAIAPGER.H<br>R.FSYTEPYTLDDSGR.F<br>R.VGDVGATFVGSGR.R<br>R.NNVPLNADGQR.V<br>R.DRVGVDGATFVGSGR.R<br>R.TSLDIGNTRVLLK.G<br>R.DAEATGSLRPGTIVGTAGNTGIGLALVGNALGYK.T<br>K.AEGSSVAEGIQNR.I<br>R.YLSTLYNPEWLAAR.G<br>K.TIIVMPDNQSAEK.M<br>R.ITANLEGAPIOTQFR.I<br>R.ISDAEGLAVR.R<br>R.IAETDNAIWANQFDNIANR.K<br>R.ALGAELVLPAPFANPFGHVHTSR.R<br>K.AHISGTAEEIWAQMGR.I<br>R.IAETDNAIWANQFDNIANR.K.A<br>R.IDGFTCAAGTGGTIGTGLGLK.A<br>R.IATLDSGFR.Y<br>R.AALYVVR.D<br>K.GPSEATGCEIWGK.C<br>R.LLDEGLCLGLSSGINVAGAMALAR.Q<br>R.KAHISGTAEEIWAQMGR.I<br>R.AEVEWTDQTR.I<br>R.AELLDLAAEAEEGHADAEEALTEQAGSR.G<br>R.VLTDGIGSIDVSNTSADHAVITDPLTVER.I<br>R.SGGFVYAPGLR.A<br>R.GPAVLFGSQAIGGAVNLFDR.R                                                                                         |
| YP_616919 | Sala_1874 | Sporulation related                            | 13.68%            | 6                       | R.ELVRDQIGVMVNDVIAATAANVADAGVASAEVR.A<br>R.AETVPASSPPANPPTSAAVK.A<br>R.LASNNNDATALLDAGR.A<br>R.DLLGQDDAQR.D<br>R.ASISLEDYR.A<br>R.AIQLLTQQLR.A<br>R.AALGFLLR.A<br>R.VSVVATGIDGTGEAAQAPATR.S<br>R.FELDPDANITWGSFNDSLDDGK.I<br>R.SADAGIAELQHDVDTLIVPNQLFLVANPNITFK.E<br>R.VEGDFIVANTDAQALNASPAER.R<br>R.IQLGTQITQGLGAGSRPEVGR.A<br>K.AMMGTGEAEGDGR.A<br>R.IAVIGVGGAGGNAIANMIAAR.V<br>K.EAFTMADEVQQVGR.G<br>R.GAGTSDGDEKGDVADIPR.F<br>R.GITDLMMVPLINLDFADV.R.S<br>K.AIANPLLDGVMAGAK.G<br>R.SIGGGTLFER.M<br>R.LMEVDEANHIR.E<br>R.GILTVGVTKPFMFEGAR.R<br>R.YTHSGLVTSVIAIDKELTK.Q<br>R.DDSNYGNPISR.D<br>R.DALGPWQDFDR.L<br>K.GVADALESR.G<br>R.LAEAKPDVFNALHGVGPGEDTVQGLMDLMGR.Y<br>R.ELTVAVLGDALAVTEL.R.V<br>R.AVGMDYAEIYELVER.I<br>R.MKDLALQHR.L<br>K.YTDGLTEHVCADVPDDVAQR.M<br>K.SGFYDYDAK.Y<br>R.AVGMDYAEIYELVER.I<br>K.LTPQAPLAPLWFK.S<br>R.HSELPEGAVVGGATFR.G<br>R.DLDPAPVPMALGLSNLIVR.D<br>K.HTNFLINTGDATSADIEALGEEVRR.R<br>R.DAGIAGMEFLR.S<br>K.SGGAADWLFEPK.D<br>K.HTNFLINTGDATSADIEALGEEVRR.R<br>R.KTLALADLGYTYR.H<br>R.GLMVGGAQVSEK.H<br>K.TLALADLGYTYR.H<br>K.SGIELQWEIQR.V<br>R.QANVVDADALAASLAASIK.A<br>K.TTTSVAALLDAGGIDPTVINGIINNYGSNAR.L<br>R.QGSSDIADSYVVEGLR.K<br>K.STVAIAGTHGK.T<br>R.HNVQNALAAVAALHMGVPEDEK.I<br>R.GTNVTPGPDGNR.F<br>K.VAIGHAPENVGVAVVVSTAVK.R<br>K.VGEIVTDEGVVTVDDYAHHPVEIR.A<br>K.RGNPEVEAALQQR.I<br>R.RAEMLAELMR.L<br>R.LGASDWMVVEADESDGSFLR.L<br>R.IITYGFSQAQDVR.G<br>R.VVAVVQPHR.F<br>R.GNPEVEAALQQR.I<br>K.MAAGLASAVEGAA.<br>K.IVSGFNGFAGVK.R<br>R.VIHEQNAVLGR.V<br>R.LLVVGGSLGATVLEVVPAAIAMPLR.A<br>R.EEGFPILLEDGIFR.L<br>R.VDAVAVYHIQR.Y<br>R.DLADLVESFAAPMMDVIR.V<br>R.AASGPLGLWK.G<br>R.AASGIAAARR.E<br>K.IPGAPAELETHVLPAGR.A<br>R.DQVAIATDDDDPSK.M<br>R.VLGLDDEAIFR.G<br>R.SSLATVEALASAGVYTAWDDREAR.D<br>R.DAHVPVIGDIEFAEAR.S<br>K.AVGGLDPAAGLAFAPMPLTGR.G<br>R.VADSAAALNLTASR.A<br>K.GSNSVGLSHVVTALINGDY.<br>K.ELGPGGEAYHAGLAAPLVAAGVQFALLVGEEMAPLAK.A<br>R.HPSTADFGIFEMGPHHAGELALTR.I<br>R.LGLLIRPDAVLUK.G<br>R.IDFAHVPAPHDATAR.L<br>R.IAVPGHILVIDESYANANPASMATIGQLAGESADR.K<br>K.SYNNHVGVLPLSLAR.M<br>K.GENADGHFSIDK.A<br>K.GEIFFELGEPGTAIPDPSPHYAR.L<br>K.EALFALDR.F<br>R.TPTQLQLLVAAGDVTHK.V<br>K.VDGAHVADANPR.R<br>R.VLTVQAGEALR.L<br>K.VAPGTLFGAFVGER.F<br>R.FNGEDFFPDVAVAGAVAVVVARPDAK.V<br>K.GHECQQLVGR.G<br>R.VIPFDVSVAREEAA.<br>R.LAALLDDWAGPNPVVTGLAIDHR.K<br>R.AAIAAAIAAAR.A<br>R.DAIAAAAAPGAQVIGDRR.A<br>R.SGAPYVDYAHYTPDAIEAALDRLPHATGR.L<br>R.LLIVFAGGDRDQAK.R<br>R.HVDATFGAGGYTR.A<br>R.HDPVLLVEIAALAIAPGER.H<br>R.FSYTEPYTLDDSGR.F<br>R.VGDVGATFVGSGR.R<br>R.NNVPLNADGQR.V<br>R.DRVGVDGATFVGSGR.R<br>R.TSLDIGNTRVLLK.G<br>R.DAEATGSLRPGTIVGTAGNTGIGLALVGNALGYK.T<br>K.AEGSSVAEGIQNR.I<br>R.YLSTLYNPEWLAAR.G<br>K.TIIVMPDNQSAEK.M<br>R.ITANLEGAPIOTQFR.I<br>R.ISDAEGLAVR.R<br>R.IAETDNAIWANQFDNIANR.K<br>R.ALGAELVLPAPFANPFGHVHTSR.R<br>K.AHISGTAEEIWAQMGR.I<br>R.IAETDNAIWANQFDNIANR.K.A<br>R.IDGFTCAAGTGGTIGTGLGLK.A<br>R.IATLDSGFR.Y<br>R.AALYVVR.D<br>K.GPSEATGCEIWGK.C<br>R.LLDEGLCLGLSSGINVAGAMALAR.Q<br>R.KAHISGTAEEIWAQMGR.I<br>R.AEVEWTDQTR.I<br>R.AELLDLAAEAEEGHADAEEALTEQAGSR.G<br>R.VLTDGIGSIDVSNTSADHAVITDPLTVER.I<br>R.SGGFVYAPGLR.A<br>R.GPAVLFGSQAIGGAVNLFDR.R                                                                                                                                                                                                                                                                                                                                                                                                               |
| YP_616920 | Sala_1875 | cell division protein FtsZ                     | 55.39%            | 14                      | R.ELVRDQIGVMVNDVIAATAANVADAGVASAEVR.A<br>R.AETVPASSPPANPPTSAAVK.A<br>R.LASNNNDATALLDAGR.A<br>R.DLLGQDDAQR.D<br>R.ASISLEDYR.A<br>R.AIQLLTQQLR.A<br>R.AALGFLLR.A<br>R.VSVVATGIDGTGEAAQAPATR.S<br>R.FELDPDANITWGSFNDSLDDGK.I<br>R.SADAGIAELQHDVDTLIVPNQLFLVANPNITFK.E<br>R.VEGDFIVANTDAQALNASPAER.R<br>R.IQLGTQITQGLGAGSRPEVGR.A<br>K.AMMGTGEAEGDGR.A<br>R.IAVIGVGGAGGNAIANMIAAR.V<br>K.EAFTMADEVQQVGR.G<br>R.GAGTSDGDEKGDVADIPR.F<br>R.GITDLMMVPLINLDFADV.R.S<br>K.AIANPLLDGVMAGAK.G<br>R.SIGGGTLFER.M<br>R.LMEVDEANHIR.E<br>R.GILTVGVTKPFMFEGAR.R<br>R.YTHSGLVTSVIAIDKELTK.Q<br>R.DDSNYGNPISR.D<br>R.DALGPWQDFDR.L<br>K.GVADALESR.G<br>R.LAEAKPDVFNALHGVGPGEDTVQGLMDLMGR.Y<br>R.ELTVAVLGDALAVTEL.R.V<br>R.AVGMDYAEIYELVER.I<br>R.MKDLALQHR.L<br>K.YTDGLTEHVCADVPDDVAQR.M<br>K.SGFYDYDAK.Y<br>R.AVGMDYAEIYELVER.I<br>K.LTPQAPLAPLWFK.S<br>R.HSELPEGAVVGGATFR.G<br>R.DLDPAPVPMALGLSNLIVR.D<br>K.HTNFLINTGDATSADIEALGEEVRR.R<br>R.DAGIAGMEFLR.S<br>K.SGGAADWLFEPK.D<br>K.HTNFLINTGDATSADIEALGEEVRR.R<br>R.KTLALADLGYTYR.H<br>R.GLMVGGAQVSEK.H<br>K.TLALADLGYTYR.H<br>K.SGIELQWEIQR.V<br>R.QANVVDADALAASLAASIK.A<br>K.TTTSVAALLDAGGIDPTVINGIINNYGSNAR.L<br>R.QGSSDIADSYVVEGLR.K<br>K.STVAIAGTHGK.T<br>R.HNVQNALAAVAALHMGVPEDEK.I<br>R.GTNVTPGPDGNR.F<br>K.VAIGHAPENVGVAVVVSTAVK.R<br>K.VGEIVTDEGVVTVDDYAHHPVEIR.A<br>K.RGNPEVEAALQQR.I<br>R.RAEMLAELMR.L<br>R.LGASDWMVVEADESDGSFLR.L<br>R.IITYGFSQAQDVR.G<br>R.VVAVVQPHR.F<br>R.GNPEVEAALQQR.I<br>K.MAAGLASAVEGAA.<br>K.IVSGFNGFAGVK.R<br>R.VIHEQNAVLGR.V<br>R.LLVVGGSLGATVLEVVPAAIAMPLR.A<br>R.EEGFPILLEDGIFR.L<br>R.VDAVAVYHIQR.Y<br>R.DLADLVESFAAPMMDVIR.V<br>R.AASGPLGLWK.G<br>R.AASGIAAARR.E<br>K.IPGAPAELETHVLPAGR.A<br>R.DQVAIATDDDDPSK.M<br>R.VLGLDDEAIFR.G<br>R.SSLATVEALASAGVYTAWDDREAR.D<br>R.DAHVPVIGDIEFAEAR.S<br>K.AVGGLDPAAGLAFAPMPLTGR.G<br>R.VADSAAALNLTASR.A<br>K.GSNSVGLSHVVTALINGDY.<br>K.ELGPGGEAYHAGLAAPLVAAGVQFALLVGEEMAPLAK.A<br>R.HPSTADFGIFEMGPHHAGELALTR.I<br>R.LGLLIRPDAVLUK.G<br>R.IDFAHVPAPHDATAR.L<br>R.IAVPGHILVIDESYANANPASMATIGQLAGESADR.K<br>K.SYNNHVGVLPLSLAR.M<br>K.GENADGHFSIDK.A<br>K.GEIFFELGEPGTAIPDPSPHYAR.L<br>K.EALFALDR.F<br>R.TPTQLQLLVAAGDVTHK.V<br>K.VDGAHVADANPR.R<br>R.VLTVQAGEALR.L<br>K.VAPGTLFGAFVGER.F<br>R.FNGEDFFPDVAVAGAVAVVVARPDAK.V<br>K.GHECQQLVGR.G<br>R.VIPFDVSVAREEAA.<br>R.LAALLDDWAGPNPVVTGLAIDHR.K<br>R.AAIAAAIAAAR.A<br>R.DAIAAAAAPGAQVIGDRR.A<br>R.SGAPYVDYAHYTPDAIEAALDRLPHATGR.L<br>R.LLIVFAGGDRDQAK.R<br>R.HVDATFGAGGYTR.A<br>R.HDPVLLVEIAALAIAPGER.H<br>R.FSYTEPYTLDDSGR.F<br>R.VGDVGATFVGSGR.R<br>R.NNVPLNADGQR.V<br>R.DRVGVDGATFVGSGR.R<br>R.TSLDIGNTRVLLK.G<br>R.DAEATGSLRPGTIVGTAGNTGIGLALVGNALGYK.T<br>K.AEGSSVAEGIQNR.I<br>R.YLSTLYNPEWLAAR.G<br>K.TIIVMPDNQSAEK.M<br>R.ITANLEGAPIOTQFR.I<br>R.ISDAEGLAVR.R<br>R.IAETDNAIWANQFDNIANR.K<br>R.ALGAELVLPAPFANPFGHVHTSR.R<br>K.AHISGTAEEIWAQMGR.I<br>R.IAETDNAIWANQFDNIANR.K.A<br>R.IDGFTCAAGTGGTIGTGLGLK.A<br>R.IATLDSGFR.Y<br>R.AALYVVR.D<br>K.GPSEATGCEIWGK.C<br>R.LLDEGLCLGLSSGINVAGAMALAR.Q<br>R.KAHISGTAEEIWAQMGR.I<br>R.AEVEWTDQTR.I<br>R.AELLDLAAEAEEGHADAEEALTEQAGSR.G<br>R.VLTDGIGSIDVSNTSADHAVITDPLTVER.I<br>R.SGGFVYAPGLR.A<br>R.GPAVLFGSQAIGGAVNLFDR.R                                                                                                                                                                                                                                                                                                                                                                                                               |
| YP_616923 | Sala_1878 | D-alanine--D-alanine ligase                    | 49.68%            | 11                      | R.ELVRDQIGVMVNDVIAATAANVADAGVASAEVR.A<br>R.AETVPASSPPANPPTSAAVK.A<br>R.LASNNNDATALLDAGR.A<br>R.DLLGQDDAQR.D<br>R.ASISLEDYR.A<br>R.AIQLLTQQLR.A<br>R.AALGFLLR.A<br>R.VSVVATGIDGTGEAAQAPATR.S<br>R.FELDPDANITWGSFNDSLDDGK.I<br>R.SADAGIAELQHDVDTLIVPNQLFLVANPNITFK.E<br>R.VEGDFIVANTDAQALNASPAER.R<br>R.IQLGTQITQGLGAGSRPEVGR.A<br>K.AMMGTGEAEGDGR.A<br>R.IAVIGVGGAGGNAIANMIAAR.V<br>K.EAFTMADEVQQVGR.G<br>R.GAGTSDGDEKGDVADIPR.F<br>R.GITDLMMVPLINLDFADV.R.S<br>K.AIANPLLDGVMAGAK.G<br>R.SIGGGTLFER.M<br>R.LMEVDEANHIR.E<br>R.GILTVGVTKPFMFEGAR.R<br>R.YTHSGLVTSVIAIDKELTK.Q<br>R.DDSNYGNPISR.D<br>R.DALGPWQDFDR.L<br>K.GVADALESR.G<br>R.LAEAKPDVFNALHGVGPGEDTVQGLMDLMGR.Y<br>R.ELTVAVLGDALAVTEL.R.V<br>R.AVGMDYAEIYELVER.I<br>R.MKDLALQHR.L<br>K.YTDGLTEHVCADVPDDVAQR.M<br>K.SGFYDYDAK.Y<br>R.AVGMDYAEIYELVER.I<br>K.LTPQAPLAPLWFK.S<br>R.HSELPEGAVVGGATFR.G<br>R.DLDPAPVPMALGLSNLIVR.D<br>K.HTNFLINTGDATSADIEALGEEVRR.R<br>R.DAGIAGMEFLR.S<br>K.SGGAADWLFEPK.D<br>K.HTNFLINTGDATSADIEALGEEVRR.R<br>R.KTLALADLGYTYR.H<br>R.GLMVGGAQVSEK.H<br>K.TLALADLGYTYR.H<br>K.SGIELQWEIQR.V<br>R.QANVVDADALAASLAASIK.A<br>K.TTTSVAALLDAGGIDPTVINGIINNYGSNAR.L<br>R.QGSSDIADSYVVEGLR.K<br>K.STVAIAGTHGK.T<br>R.HNVQNALAAVAALHMGVPEDEK.I<br>R.GTNVTPGPDGNR.F<br>K.VAIGHAPENVGVAVVVSTAVK.R<br>K.VGEIVTDEGVVTVDDYAHHPVEIR.A<br>K.RGNPEVEAALQQR.I<br>R.RAEMLAELMR.L<br>R.LGASDWMVVEADESDGSFLR.L<br>R.IITYGFSQAQDVR.G<br>R.VVAVVQPHR.F<br>R.GNPEVEAALQQR.I<br>K.MAAGLASAVEGAA.<br>K.IVSGFNGFAGVK.R<br>R.VIHEQNAVLGR.V<br>R.LLVVGGSLGATVLEVVPAAIAMPLR.A<br>R.EEGFPILLEDGIFR.L<br>R.VDAVAVYHIQR.Y<br>R.DLADLVESFAAPMMDVIR.V<br>R.AASGPLGLWK.G<br>R.AASGIAAARR.E<br>K.IPGAPAELETHVLPAGR.A<br>R.DQVAIATDDDDPSK.M<br>R.VLGLDDEAIFR.G<br>R.SSLATVEALASAGVYTAWDDREAR.D<br>R.DAHVPVIGDIEFAEAR.S<br>K.AVGGLDPAAGLAFAPMPLTGR.G<br>R.VADSAAALNLTASR.A<br>K.GSNSVGLSHVVTALINGDY.<br>K.ELGPGGEAYHAGLAAPLVAAGVQFALLVGEEMAPLAK.A<br>R.HPSTADFGIFEMGPHHAGELALTR.I<br>R.LGLLIRPDAVLUK.G<br>R.IDFAHVPAPHDATAR.L<br>R.IAVPGHILVIDESYANANPASMATIGQLAGESADR.K<br>K.SYNNHVGVLPLSLAR.M<br>K.GENADGHFSIDK.A<br>K.GEIFFELGEPGTAIPDPSPHYAR.L<br>K.EALFALDR.F<br>R.TPTQLQLLVAAGDVTHK.V<br>K.VDGAHVADANPR.R<br>R.VLTVQAGEALR.L<br>K.VAPGTLFGAFVGER.F<br>R.FNGEDFFPDVAVAGAVAVVVARPDAK.V<br>K.GHECQQLVGR.G<br>R.VIPFDVSVAREEAA.<br>R.LAALLDDWAGPNPVVTGLAIDHR.K<br>R.AAIAAAIAAAR.A<br>R.DAIAAAAAPGAQVIGDRR.A<br>R.SGAPYVDYAHYTPDAIEAALDRLPHATGR.L<br>R.LLIVFAGGDRDQAK.R<br>R.HVDATFGAGGYTR.A<br>R.HDPVLLVEIAALAIAPGER.H<br>R.FSYTEPYTLDDSGR.F<br>R.VGDVGATFVGSGR.R<br>R.NNVPLNADGQR.V<br>R.DRVGVDGATFVGSGR.R<br>R.TSLDIGNTRVLLK.G<br>R.DAEATGSLRPGTIVGTAGNTGIGLALVGNALGYK.T<br>K.AEGSSVAEGIQNR.I<br>R.YLSTLYNPEWLAAR.G<br>K.TIIVMPDNQSAEK.M<br>R.ITANLEGAPIOTQFR.I<br>R.ISDAEGLAVR.R<br>R.IAETDNAIWANQFDNIANR.K<br>R.ALGAELVLPAPFANPFGHVHTSR.R<br>K.AHISGTAEEIWAQMGR.I<br>R.IAETDNAIWANQFDNIANR.K.A<br>R.IDGFTCAAGTGGTIGTGLGLK.A<br>R.IATLDSGFR.Y<br>R.AALYVVR.D<br>K.GPSEATGCEIWGK.C<br>R.LLDEGLCLGLSSGINVAGAMALAR.Q<br>R.KAHISGTAEEIWAQMGR.I<br>R.AEVEWTDQTR.I<br>R.AELLDLAAEAEEGHADAEEALTEQAGSR.G<br>R.VLTDGIGSIDVSNTSADHAVITDPLTVER.I<br>R.SGGFVYAPGLR.A<br>R.GPAVLFGSQAIGGAVNLFDR.R                                                                                                                                                                                                                                                                                                                                                                                                               |
| YP_616924 | Sala_1879 | UDP-N-acetylenolpyruvoylglucosamine reductase  | 44.82%            | 11                      | R.ELVRDQIGVMVNDVIAATAANVADAGVASAEVR.A<br>R.AETVPASSPPANPPTSAAVK.A<br>R.LASNNNDATALLDAGR.A<br>R.DLLGQDDAQR.D<br>R.ASISLEDYR.A<br>R.AIQLLTQQLR.A<br>R.AALGFLLR.A<br>R.VSVVATGIDGTGEAAQAPATR.S<br>R.FELDPDANITWGSFNDSLDDGK.I<br>R.SADAGIAELQHDVDTLIVPNQLFLVANPNITFK.E<br>R.VEGDFIVANTDAQALNASPAER.R<br>R.IQLGTQITQGLGAGSRPEVGR.A<br>K.AMMGTGEAEGDGR.A<br>R.IAVIGVGGAGGNAIANMIAAR.V<br>K.EAFTMADEVQQVGR.G<br>R.GAGTSDGDEKGDVADIPR.F<br>R.GITDLMMVPLINLDFADV.R.S<br>K.AIANPLLDGVMAGAK.G<br>R.SIGGGTLFER.M<br>R.LMEVDEANHIR.E<br>R.GILTVGVTKPFMFEGAR.R<br>R.YTHSGLVTSVIAIDKELTK.Q<br>R.DDSNYGNPISR.D<br>R.DALGPWQDFDR.L<br>K.GVADALESR.G<br>R.LAEAKPDVFNALHGVGPGEDTVQGLMDLMGR.Y<br>R.ELTVAVLGDALAVTEL.R.V<br>R.AVGMDYAEIYELVER.I<br>R.MKDLALQHR.L<br>K.YTDGLTEHVCADVPDDVAQR.M<br>K.SGFYDYDAK.Y<br>R.AVGMDYAEIYELVER.I<br>K.LTPQAPLAPLWFK.S<br>R.HSELPEGAVVGGATFR.G<br>R.DLDPAPVPMALGLSNLIVR.D<br>K.HTNFLINTGDATSADIEALGEEVRR.R<br>R.DAGIAGMEFLR.S<br>K.SGGAADWLFEPK.D<br>K.HTNFLINTGDATSADIEALGEEVRR.R<br>R.KTLALADLGYTYR.H<br>R.GLMVGGAQVSEK.H<br>K.TLALADLGYTYR.H<br>K.SGIELQWEIQR.V<br>R.QANVVDADALAASLAASIK.A<br>K.TTTSVAALLDAGGIDPTVINGIINNYGSNAR.L<br>R.QGSSDIADSYVVEGLR.K<br>K.STVAIAGTHGK.T<br>R.HNVQNALAAVAALHMGVPEDEK.I<br>R.GTNVTPGPDGNR.F<br>K.VAIGHAPENVGVAVVVSTAVK.R<br>K.VGEIVTDEGVVTVDDYAHHPVEIR.A<br>K.RGNPEVEAALQQR.I<br>R.RAEMLAELMR.L<br>R.LGASDWMVVEADESDGSFLR.L<br>R.IITYGFSQAQDVR.G<br>R.VVAVVQPHR.F<br>R.GNPEVEAALQQR.I<br>K.MAAGLASAVEGAA.<br>K.IVSGFNGFAGVK.R<br>R.VIHEQNAVLGR.V<br>R.LLVVGGSLGATVLEVVPAAIAMPLR.A<br>R.EEGFPILLEDGIFR.L<br>R.VDAVAVYHIQR.Y<br>R.DLADLVESFAAPMMDVIR.V<br>R.AASGPLGLWK.G<br>R.AASGIAAARR.E<br>K.IPGAPAELETHVLPAGR.A<br>R.DQVAIATDDDDPSK.M<br>R.VLGLDDEAIFR.G<br>R.SSLATVEALASAGVYTAWDDREAR.D<br>R.DAHVPVIGDIEFAEAR.S<br>K.AVGGLDPAAGLAFAPMPLTGR.G<br>R.VADSAAALNLTASR.A<br>K.GSNSVGLSHVVTALINGDY.<br>K.ELGPGGEAYHAGLAAPLVAAGVQFALLVGEEMAPLAK.A<br>R.HPSTADFGIFEMGPHHAGELALTR.I<br>R.LGLLIRPDAVLUK.G<br>R.IDFAHVPAPHDATAR.L<br>R.IAVPGHILVIDESYANANPASMATIGQLAGESADR.K<br>K.SYNNHVGVLPLSLAR.M<br>K.GENADGHFSIDK.A<br>K.GEIFFELGEPGTAIPDPSPHYAR.L<br>K.EALFALDR.F<br>R.TPTQLQLLVAAGDVTHK.V<br>K.VDGAHVADANPR.R<br>R.VLTVQAGEALR.L<br>K.VAPGTLFGAFVGER.F<br>R.FNGEDFFPDVAVAGAVAVVVARPDAK.V<br>K.GHECQQLVGR.G<br>R.VIPFDVSVAREEAA.<br>R.LAALLDDWAGPNPVVTGLAIDHR.K<br>R.AAIAAAIAAAR.A<br>R.DAIAAAAAPGAQVIGDRR.A<br>R.SGAPYVDYAHYTPDAIEAALDRLPHATGR.L<br>R.LLIVFAGGDRDQAK.R<br>R.HVDATFGAGGYTR.A<br>R.HDPVLLVEIAALAIAPGER.H<br>R.FSYTEPYTLDDSGR.F<br>R.VGDVGATFVGSGR.R<br>R.NNVPLNADGQR.V<br>R.DRVGVDGATFVGSGR.R<br>R.TSLDIGNTRVLLK.G<br>R.DAEATGSLRPGTIVGTAGNTGIGLALVGNALGYK.T<br>K.AEGSSVAEGIQNR.I<br>R.YLSTLYNPEWLAAR.G<br>K.TIIVMPDNQSAEK.M<br>R.ITANLEGAPIOTQFR.I<br>R.ISDAEGLAVR.R<br>R.IAETDNAIWANQFDNIANR.K<br>R.ALGAELVLPAPFANPFGHVHTSR.R<br>K.AHISGTAEEIWAQMGR.I<br>R.IAETDNAIWANQFDNIANR.K.A<br>R.IDGFTCAAGTGGTIGTGLGLK.A<br>R.IATLDSGFR.Y<br>R.AALYVVR.D<br>K.GPSEATGCEIWGK.C<br>R.LLDEGLCLGLSSGINVAGAMALAR.Q<br>R.KAHISGTAEEIWAQMGR.I<br>R.AEVEWTDQTR.I<br>R.AELLDLAAEAEEGHADAEEALTEQAGSR.G<br>R.VLTDGIGSIDVSNTSADHAVITDPLTVER.I<br>R.SGGFVYAPGLR.A<br>R.GPAVLFGSQAIGGAVNLFDR.R                                                                                                                                                                                                                                                                                                                                                                                                               |
| YP_616925 | Sala_1880 | UDP-N-acetylmuramate--alanine ligase           | 53.04%            | 16                      | R.ELVRDQIGVMVNDVIAATAANVADAGVASAEVR.A<br>R.AETVPASSPPANPPTSAAVK.A<br>R.LASNNNDATALLDAGR.A<br>R.DLLGQDDAQR.D<br>R.ASISLEDYR.A<br>R.AIQLLTQQLR.A<br>R.AALGFLLR.A<br>R.VSVVATGIDGTGEAAQAPATR.S<br>R.FELDPDANITWGSFNDSLDDGK.I<br>R.SADAGIAELQHDVDTLIVPNQLFLVANPNITFK.E<br>R.VEGDFIVANTDAQALNASPAER.R<br>R.IQLGTQITQGLGAGSRPEVGR.A<br>K.AMMGTGEAEGDGR.A<br>R.IAVIGVGGAGGNAIANMIAAR.V<br>K.EAFTMADEVQQVGR.G<br>R.GAGTSDGDEKGDVADIPR.F<br>R.GITDLMMVPLINLDFADV.R.S<br>K.AIANPLLDGVMAGAK.G<br>R.SIGGGTLFER.M<br>R.LMEVDEANHIR.E<br>R.GILTVGVTKPFMFEGAR.R<br>R.YTHSGLVTSVIAIDKELTK.Q<br>R.DDSNYGNPISR.D<br>R.DALGPWQDFDR.L<br>K.GVADALESR.G<br>R.LAEAKPDVFNALHGVGPGEDTVQGLMDLMGR.Y<br>R.ELTVAVLGDALAVTEL.R.V<br>R.AVGMDYAEIYELVER.I<br>R.MKDLALQHR.L<br>K.YTDGLTEHVCADVPDDVAQR.M<br>K.SGFYDYDAK.Y<br>R.AVGMDYAEIYELVER.I<br>K.LTPQAPLAPLWFK.S<br>R.HSELPEGAVVGGATFR.G<br>R.DLDPAPVPMALGLSNLIVR.D<br>K.HTNFLINTGDATSADIEALGEEVRR.R<br>R.DAGIAGMEFLR.S<br>K.SGGAADWLFEPK.D<br>K.HTNFLINTGDATSADIEALGEEVRR.R<br>R.KTLALADLGYTYR.H<br>R.GLMVGGAQVSEK.H<br>K.TLALADLGYTYR.H<br>K.SGIELQWEIQR.V<br>R.QANVVDADALAASLAASIK.A<br>K.TTTSVAALLDAGGIDPTVINGIINNYGSNAR.L<br>R.QGSSDIADSYVVEGLR.K<br>K.STVAIAGTHGK.T<br>R.HNVQNALAAVAALHMGVPEDEK.I<br>R.GTNVTPGPDGNR.F<br>K.VAIGHAPENVGVAVVVSTAVK.R<br>K.VGEIVTDEGVVTVDDYAHHPVEIR.A<br>K.RGNPEVEAALQQR.I<br>R.RAEMLAELMR.L<br>R.LGASDWMVVEADESDGSFLR.L<br>R.IITYGFSQAQDVR.G<br>R.VVAVVQPHR.F<br>R.GNPEVEAALQQR.I<br>K.MAAGLASAVEGAA.<br>K.IVSGFNGFAGVK.R<br>R.VIHEQNAVLGR.V<br>R.LLVVGGSLGATVLEVVPAAIAMPLR.A<br>R.EEGFPILLEDGIFR.L<br>R.VDAVAVYHIQR.Y<br>R.DLADLVESFAAPMMDVIR.V<br>R.AASGPLGLWK.G<br>R.AASGIAAARR.E<br>K.IPGAPAELETHVLPAGR.A<br>R.DQVAIATDDDDPSK.M<br>R.VLGLDDEAIFR.G<br>R.SSLATVEALASAGVYTAWDDREAR.D<br>R.DAHVPVIGDIEFAEAR.S<br>K.AVGGLDPAAGLAFAPMPLTGR.G<br>R.VADSAAALNLTASR.A<br>K.GSNSVGLSHVVTALINGDY.<br>K.ELGPGGEAYHAGLAAPLVAAGVQFALLVGEEMAPLAK.A<br>R.HPSTADFGIFEMGPHHAGELALTR.I<br>R.LGLLIRPDAVLUK.G<br>R.IDFAHVPAPHDATAR.L<br>R.IAVPGHILVIDESYANANPASMATIGQLAGESADR.K<br>K.SYNNHVGVLPLSLAR.M<br>K.GENADGHFSIDK.A<br>K.GEIFFELGEPGTAIPDPSPHYAR.L<br>K.EALFALDR.F<br>R.TPTQLQLLVAAGDVTHK.V<br>K.VDGAHVADANPR.R<br>R.VLTVQAGEALR.L<br>K.VAPGTLFGAFVGER.F<br>R.FNGEDFFPDVAVAGAVAVVVARPDAK.V<br>K.GHECQQLVGR.G<br>R.VIPFDVSVAREE                                                                                                                                                                                                                                                                                                                                                                                                                                                                                                                                                                                                                                                                                                                                                                                                                                                                                                                                                                                                                                                                                                                                                                                                                                                                          |

| Accession | Locus tag | Description                                   | Sequence coverage | No. peptides identified | List of peptides identified                                                                                                                                                                                                                                                                                                                                                                                                                                                                                                                                                                                                                                                                                                                                                                                                                                                                                                                                                                                                                                                                                                                                                                                                                                                                                                                                                                                                                                                                                                                                                                                                                                                                                                                                                                                                                                                                                                                                                                                                                                                                                                                                                                                                                                                                                                                                                                                                                                                                                                                                                                                                                                                                                                                                                                                                                                                                                                                                                                                                                                                                                                                                                                                                                                                                                                                                                                           |
|-----------|-----------|-----------------------------------------------|-------------------|-------------------------|-------------------------------------------------------------------------------------------------------------------------------------------------------------------------------------------------------------------------------------------------------------------------------------------------------------------------------------------------------------------------------------------------------------------------------------------------------------------------------------------------------------------------------------------------------------------------------------------------------------------------------------------------------------------------------------------------------------------------------------------------------------------------------------------------------------------------------------------------------------------------------------------------------------------------------------------------------------------------------------------------------------------------------------------------------------------------------------------------------------------------------------------------------------------------------------------------------------------------------------------------------------------------------------------------------------------------------------------------------------------------------------------------------------------------------------------------------------------------------------------------------------------------------------------------------------------------------------------------------------------------------------------------------------------------------------------------------------------------------------------------------------------------------------------------------------------------------------------------------------------------------------------------------------------------------------------------------------------------------------------------------------------------------------------------------------------------------------------------------------------------------------------------------------------------------------------------------------------------------------------------------------------------------------------------------------------------------------------------------------------------------------------------------------------------------------------------------------------------------------------------------------------------------------------------------------------------------------------------------------------------------------------------------------------------------------------------------------------------------------------------------------------------------------------------------------------------------------------------------------------------------------------------------------------------------------------------------------------------------------------------------------------------------------------------------------------------------------------------------------------------------------------------------------------------------------------------------------------------------------------------------------------------------------------------------------------------------------------------------------------------------------------------------|
|           |           |                                               |                   |                         | R.DFDTFSGALGANYLEAEGVK.V<br>R.VLGGLEAQGER.I<br>R.GASGVQVSHR.D<br>R.SLDILGNVSVLEGEDELAR.D<br>R.TAGSDDDDVHTGGPIIVTAPVVR.S<br>R.NLTDQFALFTLQEQWTGPLGVEAAR.F<br>R.DFNAIGAEAFVPR.N<br>R.APSAEELFNSNGPHIATQAFEVDPNLR.R<br>R.AGFADVEHTEFEDEGVGTFITNQGVGEGR.I<br>R.VWGFEEASAR.L<br>R.KVPEHVVHDAIGGYATAADDR.N<br>R.APSAEELFNSNGPHIATQAFEVDPNLR.R<br>R.EASWGAEASF.K<br>R.QAGVSATSFAPGASR.P<br>R.NLTLSLAANNIFDVEAR.R<br>R.LAQIGGFNIVADATADMTR.A<br>R.GPAVLLFGSQIGGAVNLFDRR.I<br>R.RGGLDQHAPR.I<br>R.GEVEMGDGFFDKLR.I<br>R.FESTSVRAPTGLGIER.D<br>K.IRGGLDQHAPR.I<br>R.QAGVSATSFAPGASRPVLR.G<br>R.IELAQNDR.G<br>K.VGAYAATSIVYWNK.R<br>R.EWLAIDJAR.L<br>R.LDLAPGVVDR.A<br>R.IISITSVVGATGNPQANYAASK.A<br>R.MGEGSDIAAAVYLASK.E<br>R.LAVSGSNADKLNFR.D<br>K.ALAQELASR.G<br>K.LDILVNNAGVTR.D<br>R.INLEANFR.L<br>K.EAAVYTGQTLHVNNGMAMLS.<br>R.MKDEEWMDVIR.I<br>.MFDLTGTMALVTGASGGISAIQAALAAQGAR.L<br>R.MGEGSDIAAAVYLASK.E<br>R.LAVSGSNADK.L<br>R.GVNTANCVAPGFATAMTDDLPDAQKALNQR.I<br>K.EAAVYTGQTLHVNNGMAMLS.<br>R.GVNTANCVAPGFATAMTDDLPDAQKALNQR.I<br>R.GVNTANCVAPGFATAMTDDLPDAQK.E<br>R.DTLGGDHVALPCDLGAAVADLVPAAVEALGGK.L<br>.MFDLTGTMALVTGASGGISAIQAALAAQGAR.L<br>R.SASGEVETVSLISMDIEALLK.T<br>R.GQAMQAAVPGVGVGAMAALLGADIETAQR.L<br>R.DLLVQVVTGR.V<br>R.VLEKEGGVTLAAK.A<br>R.EVFEVDDALGQK.L<br>R.LMSEGPEDQLTLENAQPAIMANAIATLR.V<br>R.ALADASSHAR.E<br>K.TRGQAMQAAVPGVGVGAMAALLGADIETAQR.L<br>R.WRESVGMEDVGVTHFVFEFGGK.V<br>R.AFIFPGQSQVGMGR.A<br>K.RSASGEVETVSLISMDIEALLK.T<br>R.LADAAEGEICTVANDNDPLQVVISGHK.G<br>R.AFIFPGQSQVGMGR.A<br>R.LMSEGPEDQLTLENAQPAIMANAIATLR.V<br>R.GQAMQAAVPGVGVGAMAALLGADIETAQR.L<br>R.QAMQAAVPGVGVGAMAALLGADIETAQR.L<br>R.ESVGMEDVGVTHFVFEFGGK.V<br>R.AVALKDYGIK.R<br>R.IGIVAPSTPILPDDAEAVR.A<br>K.AFLGYSQGNLAAALYR.D<br>R.SIGSEALVADIVAGGADAVHLTR.A<br>R.ALNIPVAGSVAALADAFAGLAR.R<br>R.IAVINADDPESAPLLAGANVLR.F<br>R.ADLNAALFNAAK.G<br>R.HNAANALAAIAAR.A<br>R.FFGDNAAIR.G<br>R.ALLFFQPHGVPLR.Q<br>K.SVTVGMIGWILER.A<br>R.GIALFPQDSSVAAAGQTLVASAAVEDSPVDAANTLGLAR.M<br>R.FAVHFAADSHDVR.L<br>R.RYELVQAGDVTVIDFAHNPDK.V<br>R.DDTLTAAGR.E<br>R.LVYCDPVYGGTVDR.S<br>R.GSDPEPLNPKR.F<br>R.QDLISQAVDALAETVTGIVGEYK.G<br>R.QDLISQAVDALAETVTGIVGEYKQVHK.T<br>R.WMTIKVDELEK.G<br>R.QAINEIIR.W<br>K.GQVHKTETWGLK.Q<br>K.TETWGLKQLAYK.I<br>R.LLQGLSER.G<br>R.HIGLLPYIVK<br>K.DAPVIDYK.D<br>R.ARHIGLLPYIVK<br>R.DIVDALAEDGVTGK.S<br>R.QASNTGQLYGSVSRDIVDALAEDGVTGK.S<br>R.QASNTGQLYGSVSR.D<br>.MEILLER.I<br>K.LGGIGDVVTVK.N<br>R.AKIEADNAER.R<br>K.SMVLELPIK.S<br>K.SLGLVDV.K<br>R.NYLLPNK.A<br>K.LHPEVVTVGVNVAR.S<br>K.LGGIGDVVTVKNGFAR.N<br>K.IEADNAER.R<br>R.IEKLGGIGDVVTVK.N<br>R.AKIEADNAER.S<br>.MEILLER.I<br>K.VKLHPEVVTVGVNVAR.S<br>K.SMVLELPIK.S<br>R.RSEAEGR.A<br>R.KLFEANR.A<br>K.DIDGKQVILR.Q<br>R.DTGAARVASR.G<br>K.AVVFASSLNPSADGYR.F<br>R.ASDAGLSIASAR.L<br>R.LAAVSAAPAPKAPTSPK.T<br>R.TAVAEWRPLAAGDADAQFNLGQAYK.L<br>R.LAQLDNLPLDQR.Q<br>R.GVPADLAQAEAVYR.R<br>R.AQLGAFGEANAR.G<br>R.LQAGGFANKGEAER.F<br>R.SVPAPPPGHDATASPW.R.A<br>R.LAAVSAAPAPK.P<br>R.AQVVLGTAHNGDLAERDWRP.A<br>K.IEVDAWQAGDYR.T<br>K.ITSEAAVALSQHGTVPVTLHHR.T<br>R.TDYAASMDIGR.T<br>R.LASDLELR.Q<br>R.AGKPLVFNVAATPK.A<br>R.TVFAAPLQPGQNGVTVR.P<br>R.ETPLPAFAQTIVAR.L<br>K.LAEQPNACQV.V<br>R.TAAGVVPVTELPQAPAAQIILADATPYR.H<br>R.HRDVAVSADLGLALAGDSEGLYLVGQAAAR.A<br>R.ILIAQLGEGDYR.S<br>R.LAALFDLPLFALWQLPPVTR.I<br>R.VIETLAGDASTK.E<br>R.VLFLHPLPR.Y<br>R.IERPESLWSPALYR.E<br>R.DIASAGTFVDGK.I<br>K.LVQLLGDNAVR.A |
| YP_616940 | Sala_1895 | hypothetical protein                          | 18.44%            | 3                       |                                                                                                                                                                                                                                                                                                                                                                                                                                                                                                                                                                                                                                                                                                                                                                                                                                                                                                                                                                                                                                                                                                                                                                                                                                                                                                                                                                                                                                                                                                                                                                                                                                                                                                                                                                                                                                                                                                                                                                                                                                                                                                                                                                                                                                                                                                                                                                                                                                                                                                                                                                                                                                                                                                                                                                                                                                                                                                                                                                                                                                                                                                                                                                                                                                                                                                                                                                                                       |
| YP_616941 | Sala_1896 | 3-oxoacyl-(acyl-carrier-protein) reductase    | 85.83%            | 17                      |                                                                                                                                                                                                                                                                                                                                                                                                                                                                                                                                                                                                                                                                                                                                                                                                                                                                                                                                                                                                                                                                                                                                                                                                                                                                                                                                                                                                                                                                                                                                                                                                                                                                                                                                                                                                                                                                                                                                                                                                                                                                                                                                                                                                                                                                                                                                                                                                                                                                                                                                                                                                                                                                                                                                                                                                                                                                                                                                                                                                                                                                                                                                                                                                                                                                                                                                                                                                       |
| YP_616942 | Sala_1897 | malonyl CoA-acyl carrier protein transacylase | 65.71%            | 18                      |                                                                                                                                                                                                                                                                                                                                                                                                                                                                                                                                                                                                                                                                                                                                                                                                                                                                                                                                                                                                                                                                                                                                                                                                                                                                                                                                                                                                                                                                                                                                                                                                                                                                                                                                                                                                                                                                                                                                                                                                                                                                                                                                                                                                                                                                                                                                                                                                                                                                                                                                                                                                                                                                                                                                                                                                                                                                                                                                                                                                                                                                                                                                                                                                                                                                                                                                                                                                       |
| YP_616943 | Sala_1898 | peptidase U61, LD-carboxypeptidase A          | 13.09%            | 2                       |                                                                                                                                                                                                                                                                                                                                                                                                                                                                                                                                                                                                                                                                                                                                                                                                                                                                                                                                                                                                                                                                                                                                                                                                                                                                                                                                                                                                                                                                                                                                                                                                                                                                                                                                                                                                                                                                                                                                                                                                                                                                                                                                                                                                                                                                                                                                                                                                                                                                                                                                                                                                                                                                                                                                                                                                                                                                                                                                                                                                                                                                                                                                                                                                                                                                                                                                                                                                       |
| YP_616944 | Sala_1899 | Mur ligase, middle region                     | 52.81%            | 14                      |                                                                                                                                                                                                                                                                                                                                                                                                                                                                                                                                                                                                                                                                                                                                                                                                                                                                                                                                                                                                                                                                                                                                                                                                                                                                                                                                                                                                                                                                                                                                                                                                                                                                                                                                                                                                                                                                                                                                                                                                                                                                                                                                                                                                                                                                                                                                                                                                                                                                                                                                                                                                                                                                                                                                                                                                                                                                                                                                                                                                                                                                                                                                                                                                                                                                                                                                                                                                       |
| YP_616945 | Sala_1900 | ribosomal protein S6                          | 59.84%            | 6                       |                                                                                                                                                                                                                                                                                                                                                                                                                                                                                                                                                                                                                                                                                                                                                                                                                                                                                                                                                                                                                                                                                                                                                                                                                                                                                                                                                                                                                                                                                                                                                                                                                                                                                                                                                                                                                                                                                                                                                                                                                                                                                                                                                                                                                                                                                                                                                                                                                                                                                                                                                                                                                                                                                                                                                                                                                                                                                                                                                                                                                                                                                                                                                                                                                                                                                                                                                                                                       |
| YP_616946 | Sala_1901 | ribosomal protein S18                         | 43.24%            | 5                       |                                                                                                                                                                                                                                                                                                                                                                                                                                                                                                                                                                                                                                                                                                                                                                                                                                                                                                                                                                                                                                                                                                                                                                                                                                                                                                                                                                                                                                                                                                                                                                                                                                                                                                                                                                                                                                                                                                                                                                                                                                                                                                                                                                                                                                                                                                                                                                                                                                                                                                                                                                                                                                                                                                                                                                                                                                                                                                                                                                                                                                                                                                                                                                                                                                                                                                                                                                                                       |
| YP_616947 | Sala_1902 | ribosomal protein L9                          | 70.48%            | 20                      |                                                                                                                                                                                                                                                                                                                                                                                                                                                                                                                                                                                                                                                                                                                                                                                                                                                                                                                                                                                                                                                                                                                                                                                                                                                                                                                                                                                                                                                                                                                                                                                                                                                                                                                                                                                                                                                                                                                                                                                                                                                                                                                                                                                                                                                                                                                                                                                                                                                                                                                                                                                                                                                                                                                                                                                                                                                                                                                                                                                                                                                                                                                                                                                                                                                                                                                                                                                                       |
| YP_616949 | Sala_1904 | beta-lactamase-like protein                   | 9.69%             | 2                       |                                                                                                                                                                                                                                                                                                                                                                                                                                                                                                                                                                                                                                                                                                                                                                                                                                                                                                                                                                                                                                                                                                                                                                                                                                                                                                                                                                                                                                                                                                                                                                                                                                                                                                                                                                                                                                                                                                                                                                                                                                                                                                                                                                                                                                                                                                                                                                                                                                                                                                                                                                                                                                                                                                                                                                                                                                                                                                                                                                                                                                                                                                                                                                                                                                                                                                                                                                                                       |
| YP_616950 | Sala_1905 | Sporulation related                           | 41.16%            | 11                      |                                                                                                                                                                                                                                                                                                                                                                                                                                                                                                                                                                                                                                                                                                                                                                                                                                                                                                                                                                                                                                                                                                                                                                                                                                                                                                                                                                                                                                                                                                                                                                                                                                                                                                                                                                                                                                                                                                                                                                                                                                                                                                                                                                                                                                                                                                                                                                                                                                                                                                                                                                                                                                                                                                                                                                                                                                                                                                                                                                                                                                                                                                                                                                                                                                                                                                                                                                                                       |
| YP_616951 | Sala_1906 | plasmid partitioning-family protein           | 37.08%            | 6                       |                                                                                                                                                                                                                                                                                                                                                                                                                                                                                                                                                                                                                                                                                                                                                                                                                                                                                                                                                                                                                                                                                                                                                                                                                                                                                                                                                                                                                                                                                                                                                                                                                                                                                                                                                                                                                                                                                                                                                                                                                                                                                                                                                                                                                                                                                                                                                                                                                                                                                                                                                                                                                                                                                                                                                                                                                                                                                                                                                                                                                                                                                                                                                                                                                                                                                                                                                                                                       |
| YP_616953 | Sala_1908 | Sporulation related                           | 15.20%            | 3                       |                                                                                                                                                                                                                                                                                                                                                                                                                                                                                                                                                                                                                                                                                                                                                                                                                                                                                                                                                                                                                                                                                                                                                                                                                                                                                                                                                                                                                                                                                                                                                                                                                                                                                                                                                                                                                                                                                                                                                                                                                                                                                                                                                                                                                                                                                                                                                                                                                                                                                                                                                                                                                                                                                                                                                                                                                                                                                                                                                                                                                                                                                                                                                                                                                                                                                                                                                                                                       |
| YP_616954 | Sala_1909 | hypothetical protein                          | 20.00%            | 5                       |                                                                                                                                                                                                                                                                                                                                                                                                                                                                                                                                                                                                                                                                                                                                                                                                                                                                                                                                                                                                                                                                                                                                                                                                                                                                                                                                                                                                                                                                                                                                                                                                                                                                                                                                                                                                                                                                                                                                                                                                                                                                                                                                                                                                                                                                                                                                                                                                                                                                                                                                                                                                                                                                                                                                                                                                                                                                                                                                                                                                                                                                                                                                                                                                                                                                                                                                                                                                       |
| YP_616955 | Sala_1910 | 2OG-Fe(II) oxygenase                          | 49.54%            | 8                       |                                                                                                                                                                                                                                                                                                                                                                                                                                                                                                                                                                                                                                                                                                                                                                                                                                                                                                                                                                                                                                                                                                                                                                                                                                                                                                                                                                                                                                                                                                                                                                                                                                                                                                                                                                                                                                                                                                                                                                                                                                                                                                                                                                                                                                                                                                                                                                                                                                                                                                                                                                                                                                                                                                                                                                                                                                                                                                                                                                                                                                                                                                                                                                                                                                                                                                                                                                                                       |

| Accession | Locus tag | Description                         | Sequence coverage | No. peptides identified | List of peptides identified                                                                                                                                                                                                                                                                                                                                                                                                                                                                                                                                                                                                                                                                                                                                                                                                                                                                                                                                                                                                                                                                                                                                                                                                                                                                                                                                                                                                                                                                                                                                                                                                                                                                                                                                                                                                                                                                                                                                                                                                                                                                                                                                                                                                                                                                                                                                                                                                                                                                                                                                                                                                                                                                                                                                                                                                                                                                                                                                                                                                                                                                                       |
|-----------|-----------|-------------------------------------|-------------------|-------------------------|-------------------------------------------------------------------------------------------------------------------------------------------------------------------------------------------------------------------------------------------------------------------------------------------------------------------------------------------------------------------------------------------------------------------------------------------------------------------------------------------------------------------------------------------------------------------------------------------------------------------------------------------------------------------------------------------------------------------------------------------------------------------------------------------------------------------------------------------------------------------------------------------------------------------------------------------------------------------------------------------------------------------------------------------------------------------------------------------------------------------------------------------------------------------------------------------------------------------------------------------------------------------------------------------------------------------------------------------------------------------------------------------------------------------------------------------------------------------------------------------------------------------------------------------------------------------------------------------------------------------------------------------------------------------------------------------------------------------------------------------------------------------------------------------------------------------------------------------------------------------------------------------------------------------------------------------------------------------------------------------------------------------------------------------------------------------------------------------------------------------------------------------------------------------------------------------------------------------------------------------------------------------------------------------------------------------------------------------------------------------------------------------------------------------------------------------------------------------------------------------------------------------------------------------------------------------------------------------------------------------------------------------------------------------------------------------------------------------------------------------------------------------------------------------------------------------------------------------------------------------------------------------------------------------------------------------------------------------------------------------------------------------------------------------------------------------------------------------------------------------|
| YP_616956 | Sala_1911 | GTP cyclohydrolase I                | 53.00%            | 11                      | R.FKEAPGVAIVYPSHTLHEVEPVTR.G<br>R.LQAVQYQLLR.M<br>R.ALKRDIAASGTFVVDGK.I<br>R.VKNNLQLHDAAYER.S<br>R.NLMHELNEIAALEGGK.M<br>R.LVAITFIQSLIPVQQR.N<br>R.TFEVGVYDEVLLR.D<br>R.TLIEWAGDDPAR.E<br>K.LIVPDHVAADAVR.T<br>R.TLIEWAGDDPAREGLDTPR.R<br>R.TPGVMVTSR.L<br>R.RLQVQER.L<br>R.TPGVMVTSR.L<br>K.EYCSGYGEDPSIHLSR.T<br>R.LLGCFLIEDQR.S<br>R.DRVVGSISK.L<br>K.ASIAYLPR.D                                                                                                                                                                                                                                                                                                                                                                                                                                                                                                                                                                                                                                                                                                                                                                                                                                                                                                                                                                                                                                                                                                                                                                                                                                                                                                                                                                                                                                                                                                                                                                                                                                                                                                                                                                                                                                                                                                                                                                                                                                                                                                                                                                                                                                                                                                                                                                                                                                                                                                                                                                                                                                                                                                                                               |
| YP_616957 | Sala_1912 | TonB-dependent receptor             | 13.83%            | 6                       | K.SGGINPQPAPFAVDEAFSPEIVNAFEIGSK.N<br>R.GIPTAFALGSLYGPDALSTFAPADPR.V<br>R.VDSSQDYNLSIQDR.S<br>R.NATSGVWVNTAKPNLDAFGAAGEFEYGNVNSIK.A<br>R.LFETFFDLER.I<br>R.LDVTYTGDSYGNIFNFR.I<br>R.QJAPFSQATIGQSTATGVLR.I<br>R.SQDIPIAVWVGGEQLENSISDIR.G<br>R.GQALFEKDDVSFR.L<br>R.GIGTAGDNPGEFSPVGVFVGVFR.A<br>K.GYQLAFEGNFWVQFQDX.V<br>K.TDLSTAFQMANAFTELK.G<br>K.YYNITAFPEQASAFVYVAPPR.L<br>K.AGVTVGVSVELAVR.L<br>R.NTSAGALNIITKPSNLLGGYAEASYGNLDEIELK.A<br>K.SGGYNLDR.G<br>K.DREVAISPAR.D<br>R.DGYIKDVNSDR.R<br>R.AGLNFGPDQNYAVEFVYENFNK.Y<br>K.GTAFDDHVDWLLGGFYLNEK.L<br>R.GMDVDFSGIDR.A<br>R.AGLALADLPIDR.V<br>R.MNSDANTINDVAVPFTINDGYTIVNAR.A<br>R.CSFTDFALGCGNAGASDLEFGNEDVDSFEFGVK.T<br>R.AGLALADLPIDRVLGR.G<br>K.HVVTGAVTWQPSNVGGLLHVDR.M<br>R.LKGTAFDDHVDWLLGGFYLNEK.L<br>R.VMVGYYDR.G<br>K.VVAQVELESIR.P<br>R.AYRENMPGMR.D<br>R.YNHESK.K<br>R.VDTQAFALFTHNIDFNDNVSLTLGR.Y<br>R.SESKLTGTAK.L<br>R.LDGGYHKR.D<br>R.QALQGLPSGLGNAIFNLVCPVNFPEFYGR.D<br>R.IRIGITAGDNPGEFSPVGVFVGVFR.A<br>R.GMDVDFSGIDR.A<br>K.KLDADLQSNLPGCATLQSTR.Y<br>R.NTSAGALNIITK.P<br>R.LIADYAR.T<br>R.DGYIKDVNSDRR.F<br>R.LVADPAAATGGHQAQ.<br>R.DRPSLIEQVR.L<br>R.AVGAGVLTITAR.G<br>K.TGAVEAAVIR.C<br>R.GAVIDHIAARPWIAQLEQR.C<br>R.DALVALDWGEPATLGDVPPGTSTGAR.I<br>R.FLSGSHSVVGLPLFETR.A<br>R.AVDTIWFK.A<br>K.AGGYAIQGR.A<br>R.IAAPEIDETPLKGLPR.D<br>R.APDEVVLAGDITTVSVGR.R<br>R.ALLSSVGIPLG.<br>K.LSAAEIDAYVASGEGMGK.A<br>R.VKLENHEILGHTAGK.M<br>R.GQVVELLPNMFV.V<br>K.LENDHEILGHTAGK.M<br>R.WAWSAALPAVDGGK.T<br>R.EVVAFQGGAVDPDSR.W<br>R.TLLVDEGQNLAVSALELR.M<br>R.RVDEPAADAPFAAPAPPAR.I<br>R.IVALASQPVAAEADTASAVPAVDPDHLAALK.Q<br>K.LVSTQVEGDLLR.L<br>K.VGWTGNPSPDAFEEDFYSEGVPR.K<br>R.VIATHLDPMEPEEVEPYLHR.L<br>R.LVEQDEALRR.V<br>R.LLLYGAECQNR.I<br>R.GIDASTLAPLVEEVVAAAATAAPTAPFPAPAAAANETAWEWR.R<br>K.TVDVSPYLEIGQVLTADLK.N<br>R.WAYGVGVYDQR.R<br>R.TRADGGGADSGLFIGDASNADLYSIYAGPTFAR.R<br>R.RAEVAATLR.Y<br>R.IAGLDVGVGR.F<br>R.GLNEAGALATR.T<br>R.ADGGQADSGLFIGDASNADLYSIYAGPTFAR.R<br>R.PQDIFDSSTNHVAWASVGARPGDLPGWQVSGGYER.E<br>R.PGDLPGWQVSGGYER.E<br>R.FGWNLDGDSCTISGLAR.G<br>R.VLASANPEGK.T<br>R.TEALLAQLEAGAGR.I<br>R.ADTLLESALR.D<br>K.VVPQQDNIFEITSSIAIGLSLSDADNAK.L<br>K.LASAVLESITVFRDDQLR.G<br>R.ASGLPVIIGSITEVLTIPER.Q<br>R.ITAQIQNPGIAEYDR.I<br>R.AELSQIDSQVAAQQLAAANGQLASTPATIPGVGGVGSVGR.Q<br>R.LLVDVNEILPDDAQGGGR.A<br>R.AAFEQNIQILVPGGAGSPAQR.V<br>R.IVGATEKPAIFPR.A<br>R.ITPLITDMPAVGK.T<br>K.TPTMLQQDK.L<br>R.NPELGGK.V<br>R.LQPGDVIIPESMF.<br>R.ANMTVLDAMIAVGLGEYAGNK.A<br>K.GPQAQHILADSGAK.L<br>R.VSPTEIEEAASGLVYEAFAVGVDPAR.L<br>R.TFPAADYPMYGLTEAFR.S<br>R.NLNFHQIQVIEWR.D<br>R.FRPAPPASLYGGTAVWSDGR.V<br>R.PEWFDLLEAHGFAAGGR.F<br>R.FDAGGSAGATVR.L<br>R.VSADREAGIATLSLESLATAR.G<br>R.AIADIAAWSR.T<br>R.SIRLGGEGJAGTPLWLR.A<br>R.LRIDPVGTRR.A<br>R.GGPLLLAGNALSPAMIAGLGAEEAQVPELR.S<br>R.WADWQGGQLLADPQWVGSRT<br>R.WGSLYDALYGTDALDAPPKPGGYDAER.G<br>R.LFVAVEDMLGLAR.H<br>R.LVFNITGFLDR.T<br>R.FWADFALLGQFAPENTELLAK.R<br>K.VDAQNAGDPLYEK.L<br>R.LADFIEQR.A<br>R.FALNAANAR.W<br>R.ALIFEGVAQPSGYTEPLLK.Y<br>K.AFLDDAVPLASGR.W<br>R.NWSDAEIAR.E<br>R.LPGGAEPEGLCDAVITSLCSLHDLK.G<br>K.ASDWIAAYEDR.N<br>R.TGDEIHTSMR.A |
| YP_616958 | Sala_1913 | TonB-dependent receptor             | 61.48%            | 35                      |                                                                                                                                                                                                                                                                                                                                                                                                                                                                                                                                                                                                                                                                                                                                                                                                                                                                                                                                                                                                                                                                                                                                                                                                                                                                                                                                                                                                                                                                                                                                                                                                                                                                                                                                                                                                                                                                                                                                                                                                                                                                                                                                                                                                                                                                                                                                                                                                                                                                                                                                                                                                                                                                                                                                                                                                                                                                                                                                                                                                                                                                                                                   |
| YP_616959 | Sala_1914 | ribonuclease                        | 28.79%            | 6                       |                                                                                                                                                                                                                                                                                                                                                                                                                                                                                                                                                                                                                                                                                                                                                                                                                                                                                                                                                                                                                                                                                                                                                                                                                                                                                                                                                                                                                                                                                                                                                                                                                                                                                                                                                                                                                                                                                                                                                                                                                                                                                                                                                                                                                                                                                                                                                                                                                                                                                                                                                                                                                                                                                                                                                                                                                                                                                                                                                                                                                                                                                                                   |
| YP_616960 | Sala_1915 | maf protein                         | 52.63%            | 7                       |                                                                                                                                                                                                                                                                                                                                                                                                                                                                                                                                                                                                                                                                                                                                                                                                                                                                                                                                                                                                                                                                                                                                                                                                                                                                                                                                                                                                                                                                                                                                                                                                                                                                                                                                                                                                                                                                                                                                                                                                                                                                                                                                                                                                                                                                                                                                                                                                                                                                                                                                                                                                                                                                                                                                                                                                                                                                                                                                                                                                                                                                                                                   |
| YP_616961 | Sala_1916 | translation initiation factor IF-1  | 40.28%            | 3                       |                                                                                                                                                                                                                                                                                                                                                                                                                                                                                                                                                                                                                                                                                                                                                                                                                                                                                                                                                                                                                                                                                                                                                                                                                                                                                                                                                                                                                                                                                                                                                                                                                                                                                                                                                                                                                                                                                                                                                                                                                                                                                                                                                                                                                                                                                                                                                                                                                                                                                                                                                                                                                                                                                                                                                                                                                                                                                                                                                                                                                                                                                                                   |
| YP_616965 | Sala_1920 | ABC transporter related             | 5.89%             | 2                       |                                                                                                                                                                                                                                                                                                                                                                                                                                                                                                                                                                                                                                                                                                                                                                                                                                                                                                                                                                                                                                                                                                                                                                                                                                                                                                                                                                                                                                                                                                                                                                                                                                                                                                                                                                                                                                                                                                                                                                                                                                                                                                                                                                                                                                                                                                                                                                                                                                                                                                                                                                                                                                                                                                                                                                                                                                                                                                                                                                                                                                                                                                                   |
| YP_616969 | Sala_1924 | hypothetical protein                | 48.55%            | 9                       |                                                                                                                                                                                                                                                                                                                                                                                                                                                                                                                                                                                                                                                                                                                                                                                                                                                                                                                                                                                                                                                                                                                                                                                                                                                                                                                                                                                                                                                                                                                                                                                                                                                                                                                                                                                                                                                                                                                                                                                                                                                                                                                                                                                                                                                                                                                                                                                                                                                                                                                                                                                                                                                                                                                                                                                                                                                                                                                                                                                                                                                                                                                   |
| YP_616970 | Sala_1925 | hypothetical protein                | 26.58%            | 10                      |                                                                                                                                                                                                                                                                                                                                                                                                                                                                                                                                                                                                                                                                                                                                                                                                                                                                                                                                                                                                                                                                                                                                                                                                                                                                                                                                                                                                                                                                                                                                                                                                                                                                                                                                                                                                                                                                                                                                                                                                                                                                                                                                                                                                                                                                                                                                                                                                                                                                                                                                                                                                                                                                                                                                                                                                                                                                                                                                                                                                                                                                                                                   |
| YP_616971 | Sala_1926 | protein-tyrosine kinase             | 11.21%            | 3                       |                                                                                                                                                                                                                                                                                                                                                                                                                                                                                                                                                                                                                                                                                                                                                                                                                                                                                                                                                                                                                                                                                                                                                                                                                                                                                                                                                                                                                                                                                                                                                                                                                                                                                                                                                                                                                                                                                                                                                                                                                                                                                                                                                                                                                                                                                                                                                                                                                                                                                                                                                                                                                                                                                                                                                                                                                                                                                                                                                                                                                                                                                                                   |
| YP_616972 | Sala_1927 | lipopolysaccharide biosynthesis     | 32.22%            | 7                       |                                                                                                                                                                                                                                                                                                                                                                                                                                                                                                                                                                                                                                                                                                                                                                                                                                                                                                                                                                                                                                                                                                                                                                                                                                                                                                                                                                                                                                                                                                                                                                                                                                                                                                                                                                                                                                                                                                                                                                                                                                                                                                                                                                                                                                                                                                                                                                                                                                                                                                                                                                                                                                                                                                                                                                                                                                                                                                                                                                                                                                                                                                                   |
| YP_616973 | Sala_1928 | polysaccharide export protein       | 37.61%            | 6                       |                                                                                                                                                                                                                                                                                                                                                                                                                                                                                                                                                                                                                                                                                                                                                                                                                                                                                                                                                                                                                                                                                                                                                                                                                                                                                                                                                                                                                                                                                                                                                                                                                                                                                                                                                                                                                                                                                                                                                                                                                                                                                                                                                                                                                                                                                                                                                                                                                                                                                                                                                                                                                                                                                                                                                                                                                                                                                                                                                                                                                                                                                                                   |
| YP_616975 | Sala_1930 | AMP-dependent synthetase and ligase | 18.43%            | 5                       |                                                                                                                                                                                                                                                                                                                                                                                                                                                                                                                                                                                                                                                                                                                                                                                                                                                                                                                                                                                                                                                                                                                                                                                                                                                                                                                                                                                                                                                                                                                                                                                                                                                                                                                                                                                                                                                                                                                                                                                                                                                                                                                                                                                                                                                                                                                                                                                                                                                                                                                                                                                                                                                                                                                                                                                                                                                                                                                                                                                                                                                                                                                   |
| YP_616976 | Sala_1931 | hypothetical protein                | 9.12%             | 2                       |                                                                                                                                                                                                                                                                                                                                                                                                                                                                                                                                                                                                                                                                                                                                                                                                                                                                                                                                                                                                                                                                                                                                                                                                                                                                                                                                                                                                                                                                                                                                                                                                                                                                                                                                                                                                                                                                                                                                                                                                                                                                                                                                                                                                                                                                                                                                                                                                                                                                                                                                                                                                                                                                                                                                                                                                                                                                                                                                                                                                                                                                                                                   |
| YP_616978 | Sala_1933 | hypothetical protein                | 39.13%            | 5                       |                                                                                                                                                                                                                                                                                                                                                                                                                                                                                                                                                                                                                                                                                                                                                                                                                                                                                                                                                                                                                                                                                                                                                                                                                                                                                                                                                                                                                                                                                                                                                                                                                                                                                                                                                                                                                                                                                                                                                                                                                                                                                                                                                                                                                                                                                                                                                                                                                                                                                                                                                                                                                                                                                                                                                                                                                                                                                                                                                                                                                                                                                                                   |
| YP_616980 | Sala_1935 | Malate synthase                     | 40.89%            | 19                      |                                                                                                                                                                                                                                                                                                                                                                                                                                                                                                                                                                                                                                                                                                                                                                                                                                                                                                                                                                                                                                                                                                                                                                                                                                                                                                                                                                                                                                                                                                                                                                                                                                                                                                                                                                                                                                                                                                                                                                                                                                                                                                                                                                                                                                                                                                                                                                                                                                                                                                                                                                                                                                                                                                                                                                                                                                                                                                                                                                                                                                                                                                                   |

| Accession | Locus tag | Description                                              | Sequence coverage | No. peptides identified | List of peptides identified                                                                                                                                                                                                                                                                                                                                                                                                                                                                                                                                                                                                                                                                                                                                                                                                                                                                                                                                                                                                                                                                                                                                                                                                                                                                                                                                                                                                                                                                                                                                                                                                                                                                                                                                                                                                                                                                                                                                                                                                                                                                                                                                                                                                                                                                                                                                                                                                                                                                                                                                                                                                                                                                                                                                                                                                                                                                                                                                                                                                                                                                                                                                                                                                                                                                                                                                                                                        |
|-----------|-----------|----------------------------------------------------------|-------------------|-------------------------|--------------------------------------------------------------------------------------------------------------------------------------------------------------------------------------------------------------------------------------------------------------------------------------------------------------------------------------------------------------------------------------------------------------------------------------------------------------------------------------------------------------------------------------------------------------------------------------------------------------------------------------------------------------------------------------------------------------------------------------------------------------------------------------------------------------------------------------------------------------------------------------------------------------------------------------------------------------------------------------------------------------------------------------------------------------------------------------------------------------------------------------------------------------------------------------------------------------------------------------------------------------------------------------------------------------------------------------------------------------------------------------------------------------------------------------------------------------------------------------------------------------------------------------------------------------------------------------------------------------------------------------------------------------------------------------------------------------------------------------------------------------------------------------------------------------------------------------------------------------------------------------------------------------------------------------------------------------------------------------------------------------------------------------------------------------------------------------------------------------------------------------------------------------------------------------------------------------------------------------------------------------------------------------------------------------------------------------------------------------------------------------------------------------------------------------------------------------------------------------------------------------------------------------------------------------------------------------------------------------------------------------------------------------------------------------------------------------------------------------------------------------------------------------------------------------------------------------------------------------------------------------------------------------------------------------------------------------------------------------------------------------------------------------------------------------------------------------------------------------------------------------------------------------------------------------------------------------------------------------------------------------------------------------------------------------------------------------------------------------------------------------------------------------------|
| YP_616984 | Sala_1939 | peptidase dimerisation                                   | 44.78%            | 10                      | R.ISSQALANLWLLHGVCTPEQVDAALAR.M<br>R.IGLACGLSGK.A<br>R.EALQSQJDAWHR.A<br>R.AGSIYVFKP.Q<br>K.VPDIIDVGLMEDR.A<br>R.LVADPVPESVDAAGR.V<br>K.TVAGQLADAFALPGLER.L<br>R.IDGGPNVVPDQAILR.V<br>R.NALVAADALRL.L<br>K.GGIIVLAAIALESPLADR.V<br>R.WAAINSGTGNLAGL.T<br>R.SAHAGRNPEEGR.N<br>R.VNMRPSTPEAMGGAESALR.A<br>R.GGAHSSDEFLITGSLAER.A<br>K.TAALTYEPALPDGTLAGARPGSGNFSTIHDR.S<br>R.AGGLGLLAR.S<br>R.GVIDEAGGSPFWDGVAQK.F<br>K.HVEVTGIAEDGEDALIATR.L<br>R.AVIGVPHPTGR.A<br>K.EYPSDELYLMVLELDLDSGEVR.G<br>R.TFHAQVLMISNDLNGASEVGGFLHPPAAR.A<br>R.AEASFASKEEYPSDELYLMVLELDLDSGEVR.G<br>R.AAKPGDLSIYEMAK.L<br>R.ILNVKGDALISWIGR.<br>K.GDAISWIGR.<br>K.HPVYIAMLPEAR.A<br>K.FFGMSFQEQDQFNVAHGNQFIADLMPK.H<br>K.HWPEALAPADLASTLLHDVLR.R<br>R.HNLVGLPGQGFVLDPRDAPWLAALGTSVEK.A<br>R.GNIASASHAGDVSQPR.A<br>R.VVADPATVDR.F<br>R.LALLDALDSELG.<br>R.AAFPVAVIEVPASAVSLAHIK.S<br>R.AAALQGGDK.M<br>R.FLADEAKLDR.I<br>R.LAFAPAFSVHPVPAPFGDEGAANHMRL.L<br>R.AQAWSSMWAANAATVSPADSGKC.G<br>R.ELIDTVEVPGGEALR.L<br>R.AALAALGPDQITVAELVPAIIDWAR.G<br>R.RFDAILVDVNGPDGLVR.A<br>K.AAALRPGGLLAWSAAPDR.F<br>R.VNLVIGDVAATIADAPR.R<br>R.LYSPVLAALAAKALR.P<br>K.LSVSTVFGVPIPK.Q<br>R.LLDLIDQR.A<br>R.GIDVSGVSHVINFEIPNVPEQVYVHR.I<br>R.AGAGIAISFIAPDRPFR.D<br>R.LDSQGDVILVATPGR.L<br>K.EIAGLADQFLNDPVTVSAPQATTAEK.V<br>R.LTGGVHTDATNASR.T<br>R.AALEAQSYQAHDLK.S<br>R.LLATVQLQGEDAR.V<br>R.LAVGTIESWLYR.L<br>R.AGGADHVAAGITNQRE<br>R.DGLGLLASASEGLAR.A<br>K.AFTFGAFILSASGATR.R<br>K.EAGHETAVQATSGLLDPYFSGSK.I<br>R.TMLFAADGTPLGSAQR.E<br>K.SAFADGVDWAELR.I<br>R.WYALEGSVYFVAGSLIK.W<br>R.ATNEPLAPVWQDR.R<br>K.MTDGTEYQTR.S<br>K.DIHPDYHMITVK.M<br>R.STWGSQGDVMTLEIDTAHPAWTGGQGR.M<br>R.MLDSGGQAK.F<br>R.FGGTLKR.<br>R.KVPVEGHLDLHTVLQAK.R<br>K.LVYFMGIDGK.F<br>R.LPNVSIAPVAGYQGLVQQR.N<br>R.ENNVITEAVTELNR.I<br>R.AAQFGAAAPATGNQPTTR.<br>R.TASQQIETTK.A<br>R.KTPQNQAALQAAKA.A<br>R.QAAQALGQISAPVDLAIAYVEDQISVR.M<br>K.KVDLLNPDVAVLAR.E<br>R.GQTLQAEINVLIAK.Y<br>K.TPQNQAALQAAKA.A<br>K.VDLLNPDVAVLAR.E<br>K.AQIDQQSR.G<br>R.NQQLMDAAR.A<br>R.TASQQIETTKAQIDQQSR.G<br>K.RQAAQALGQISAPVDLAIAYVEDQISVR.M<br>K.GVAVADR.V<br>R.VAARSNAFR.T<br>R.NQQLMDAAR.A<br>R.GQTLQAEINVLIAKYN.EAR.K<br>R.LEAQILSYLR.L<br>R.GQSASISQDFAGLGGSVK.Y<br>R.LSLGQQLQASVNYSSYSK.S<br>R.FAAYDPLNVIDTSDNDR.G<br>K.ETGLTILSSNTSYDPRLAYDQK.L<br>R.YSLNYDDVTLDL.S<br>R.VELDPLGTGAK.E<br>R.LNEGDAFNISFVVK.R<br>R.LFYLNTGYADR.V<br>K.SIELGTFEPFLDR.N<br>R.IDVNGNTLTHDK.V<br>R.IDFAVALR.K<br>R.FAAYDPLNVIDTSDNDRGQIDDLGGR.A<br>R.TTSLVGLTAYDDRNR.I<br>R.VAIGAGVWNSPFGPFR.I<br>K.LVEDVESLSEIAGLFGYAFADINPEFR.R<br>K.ELGLRPSIFLQVGSVSVK.R<br>R.INSGLYFQENLEIER.K<br>K.FSDGDLKDEMATK.E<br>R.VDVFEINEGPK.S<br>R.FFGDTWMPR.V<br>K.ETGLTILSSNTSYDPR.L<br>R.VISAVAEITSNK.Q<br>R.TMDITFNVAESPR.T<br>R.FILNLSAEGGYHFGSAPPTSDK.V<br>K.SGDWYDAK.L<br>K.QDFITYVVEEGER.Y<br>K.LVEDVESLSEIAGLFGYAFADINPEFR.R<br>R.NISVGSYVR.R<br>R.LNEGDAFNISFVVKR.T<br>R.ATLDQALKDLAATELFK.D<br>K.HFNLGSR.F<br>R.SIYFFGQCDPLVAGR.Y<br>R.INSGLYFQENLEIERK.E<br>R.FLFGEPQHR.G<br>R.DLNSFNFDNDRR.T<br>R.GQIDDLGGR.A<br>R.FILNLSAEGGYHFGSAPPTSDKVR.L<br>K.MVSLDQNRVDVFEINEGPK.S<br>R.LSLFGATSGVQSTLDLVR.R<br>R.PAQLNAENAVAAFLAGR.I<br>R.VVDAEAPAAPSSLQDIFSVDTASR.A<br>R.RVWDAEAPAAPSSLQDIFSVDTASR.A<br>K.GLELEIHHLPVGLDR.I<br>R.VGVLTAACDVQELAR.L<br>K.ISVDSATMMNK.G<br>K.AALAGQIECARAGAAALVEAER.R<br>R.RADLWMAIAGTAGLAPMTALAAAGHDVALANK.E<br>R.LAIEFRPDVAVVADESICYLKA.A<br>K.EALVSAEGLMATAAR.A<br>R.ALAPDVVALIDNALDR.T |
| YP_616985 | Sala_1940 | Arginine N-succinyltransferase                           | 56.97%            | 12                      | R.AGGLGLLAR.S<br>R.GVIDEAGGSPFWDGVAQK.F<br>K.HVEVTGIAEDGEDALIATR.L<br>R.AVIGVPHPTGR.A<br>K.EYPSDELYLMVLELDLDSGEVR.G<br>R.TFHAQVLMISNDLNGASEVGGFLHPPAAR.A<br>R.AEASFASKEEYPSDELYLMVLELDLDSGEVR.G<br>R.AAKPGDLSIYEMAK.L<br>R.ILNVKGDALISWIGR.<br>K.GDAISWIGR.<br>K.HPVYIAMLPEAR.A<br>K.FFGMSFQEQDQFNVAHGNQFIADLMPK.H<br>K.HWPEALAPADLASTLLHDVLR.R<br>R.HNLVGLPGQGFVLDPRDAPWLAALGTSVEK.A<br>R.GNIASASHAGDVSQPR.A<br>R.VVADPATVDR.F<br>R.LALLDALDSELG.<br>R.AAFPVAVIEVPASAVSLAHIK.S<br>R.AAALQGGDK.M<br>R.FLADEAKLDR.I<br>R.LAFAPAFSVHPVPAPFGDEGAANHMRL.L<br>R.AQAWSSMWAANAATVSPADSGKC.G<br>R.ELIDTVEVPGGEALR.L<br>R.AALAALGPDQITVAELVPAIIDWAR.G<br>R.RFDAILVDVNGPDGLVR.A<br>K.AAALRPGGLLAWSAAPDR.F<br>R.VNLVIGDVAATIADAPR.R<br>R.LYSPVLAALAAKALR.P<br>K.LSVSTVFGVPIPK.Q<br>R.LLDLIDQR.A<br>R.GIDVSGVSHVINFEIPNVPEQVYVHR.I<br>R.AGAGIAISFIAPDRPFR.D<br>R.LDSQGDVILVATPGR.L<br>K.EIAGLADQFLNDPVTVSAPQATTAEK.V<br>R.LTGGVHTDATNASR.T<br>R.AALEAQSYQAHDLK.S<br>R.LLATVQLQGEDAR.V<br>R.LAVGTIESWLYR.L<br>R.AGGADHVAAGITNQRE<br>R.DGLGLLASASEGLAR.A<br>K.AFTFGAFILSASGATR.R<br>K.EAGHETAVQATSGLLDPYFSGSK.I<br>R.TMLFAADGTPLGSAQR.E<br>K.SAFADGVDWAELR.I<br>R.WYALEGSVYFVAGSLIK.W<br>R.ATNEPLAPVWQDR.R<br>K.MTDGTEYQTR.S<br>K.DIHPDYHMITVK.M<br>R.STWGSQGDVMTLEIDTAHPAWTGGQGR.M<br>R.MLDSGGQAK.F<br>R.FGGTLKR.<br>R.KVPVEGHLDLHTVLQAK.R<br>K.LVYFMGIDGK.F<br>R.LPNVSIAPVAGYQGLVQQR.N<br>R.ENNVITEAVTELNR.I<br>R.AAQFGAAAPATGNQPTTR.<br>R.TASQQIETTK.A<br>R.KTPQNQAALQAAKA.A<br>R.QAAQALGQISAPVDLAIAYVEDQISVR.M<br>K.KVDLLNPDVAVLAR.E<br>R.GQTLQAEINVLIAK.Y<br>K.TPQNQAALQAAKA.A<br>K.VDLLNPDVAVLAR.E<br>K.AQIDQQSR.G<br>R.NQQLMDAAR.A<br>R.TASQQIETTKAQIDQQSR.G<br>K.RQAAQALGQISAPVDLAIAYVEDQISVR.M<br>K.GVAVADR.V<br>R.VAARSNAFR.T<br>R.NQQLMDAAR.A<br>R.GQTLQAEINVLIAKYN.EAR.K<br>R.LEAQILSYLR.L<br>R.GQSASISQDFAGLGGSVK.Y<br>R.LSLGQQLQASVNYSSYSK.S<br>R.FAAYDPLNVIDTSDNDR.G<br>K.ETGLTILSSNTSYDPRLAYDQK.L<br>R.YSLNYDDVTLDL.S<br>R.VELDPLGTGAK.E<br>R.LNEGDAFNISFVVK.R<br>R.LFYLNTGYADR.V<br>K.SIELGTFEPFLDR.N<br>R.IDVNGNTLTHDK.V<br>R.IDFAVALR.K<br>R.FAAYDPLNVIDTSDNDRGQIDDLGGR.A<br>R.TTSLVGLTAYDDRNR.I<br>R.VAIGAGVWNSPFGPFR.I<br>K.LVEDVESLSEIAGLFGYAFADINPEFR.R<br>K.ELGLRPSIFLQVGSVSVK.R<br>R.INSGLYFQENLEIER.K<br>K.FSDGDLKDEMATK.E<br>R.VDVFEINEGPK.S<br>R.FFGDTWMPR.V<br>K.ETGLTILSSNTSYDPR.L<br>R.VISAVAEITSNK.Q<br>R.TMDITFNVAESPR.T<br>R.FILNLSAEGGYHFGSAPPTSDK.V<br>K.SGDWYDAK.L<br>K.QDFITYVVEEGER.Y<br>K.LVEDVESLSEIAGLFGYAFADINPEFR.R<br>R.NISVGSYVR.R<br>R.LNEGDAFNISFVVKR.T<br>R.ATLDQALKDLAATELFK.D<br>K.HFNLGSR.F<br>R.SIYFFGQCDPLVAGR.Y<br>R.INSGLYFQENLEIERK.E<br>R.FLFGEPQHR.G<br>R.DLNSFNFDNDRR.T<br>R.GQIDDLGGR.A<br>R.FILNLSAEGGYHFGSAPPTSDKVR.L<br>K.MVSLDQNRVDVFEINEGPK.S<br>R.LSLFGATSGVQSTLDLVR.R<br>R.PAQLNAENAVAAFLAGR.I<br>R.VVDAEAPAAPSSLQDIFSVDTASR.A<br>R.RVWDAEAPAAPSSLQDIFSVDTASR.A<br>K.GLELEIHHLPVGLDR.I<br>R.VGVLTAACDVQELAR.L<br>K.ISVDSATMMNK.G<br>K.AALAGQIECARAGAAALVEAER.R<br>R.RADLWMAIAGTAGLAPMTALAAAGHDVALANK.E<br>R.LAIEFRPDVAVVADESICYLKA.A<br>K.EALVSAEGLMATAAR.A<br>R.ALAPDVVALIDNALDR.T                                                                                                                                                                                                                                                                                                                                                                          |
| YP_616986 | Sala_1941 | Succinylarginine dihydrolase                             | 45.78%            | 10                      | R.FFGMSFQEQDQFNVAHGNQFIADLMPK.H<br>K.HWPEALAPADLASTLLHDVLR.R<br>R.HNLVGLPGQGFVLDPRDAPWLAALGTSVEK.A<br>R.GNIASASHAGDVSQPR.A<br>R.VVADPATVDR.F<br>R.LALLDALDSELG.<br>R.AAFPVAVIEVPASAVSLAHIK.S<br>R.AAALQGGDK.M<br>R.FLADEAKLDR.I<br>R.LAFAPAFSVHPVPAPFGDEGAANHMRL.L<br>R.AQAWSSMWAANAATVSPADSGKC.G<br>R.ELIDTVEVPGGEALR.L<br>R.AALAALGPDQITVAELVPAIIDWAR.G<br>R.RFDAILVDVNGPDGLVR.A<br>K.AAALRPGGLLAWSAAPDR.F<br>R.VNLVIGDVAATIADAPR.R<br>R.LYSPVLAALAAKALR.P<br>K.LSVSTVFGVPIPK.Q<br>R.LLDLIDQR.A<br>R.GIDVSGVSHVINFEIPNVPEQVYVHR.I<br>R.AGAGIAISFIAPDRPFR.D<br>R.LDSQGDVILVATPGR.L<br>K.EIAGLADQFLNDPVTVSAPQATTAEK.V<br>R.LTGGVHTDATNASR.T<br>R.AALEAQSYQAHDLK.S<br>R.LLATVQLQGEDAR.V<br>R.LAVGTIESWLYR.L<br>R.AGGADHVAAGITNQRE<br>R.DGLGLLASASEGLAR.A<br>K.AFTFGAFILSASGATR.R<br>K.EAGHETAVQATSGLLDPYFSGSK.I<br>R.TMLFAADGTPLGSAQR.E<br>K.SAFADGVDWAELR.I<br>R.WYALEGSVYFVAGSLIK.W<br>R.ATNEPLAPVWQDR.R<br>K.MTDGTEYQTR.S<br>K.DIHPDYHMITVK.M<br>R.STWGSQGDVMTLEIDTAHPAWTGGQGR.M<br>R.MLDSGGQAK.F<br>R.FGGTLKR.<br>R.KVPVEGHLDLHTVLQAK.R<br>K.LVYFMGIDGK.F<br>R.LPNVSIAPVAGYQGLVQQR.N<br>R.ENNVITEAVTELNR.I<br>R.AAQFGAAAPATGNQPTTR.<br>R.TASQQIETTK.A<br>R.KTPQNQAALQAAKA.A<br>R.QAAQALGQISAPVDLAIAYVEDQISVR.M<br>K.KVDLLNPDVAVLAR.E<br>R.GQTLQAEINVLIAK.Y<br>K.TPQNQAALQAAKA.A<br>K.VDLLNPDVAVLAR.E<br>K.AQIDQQSR.G<br>R.NQQLMDAAR.A<br>R.TASQQIETTKAQIDQQSR.G<br>K.RQAAQALGQISAPVDLAIAYVEDQISVR.M<br>K.GVAVADR.V<br>R.VAARSNAFR.T<br>R.NQQLMDAAR.A<br>R.GQTLQAEINVLIAKYN.EAR.K<br>R.LEAQILSYLR.L<br>R.GQSASISQDFAGLGGSVK.Y<br>R.LSLGQQLQASVNYSSYSK.S<br>R.FAAYDPLNVIDTSDNDR.G<br>K.ETGLTILSSNTSYDPRLAYDQK.L<br>R.YSLNYDDVTLDL.S<br>R.VELDPLGTGAK.E<br>R.LNEGDAFNISFVVK.R<br>R.LFYLNTGYADR.V<br>K.SIELGTFEPFLDR.N<br>R.IDVNGNTLTHDK.V<br>R.IDFAVALR.K<br>R.FAAYDPLNVIDTSDNDRGQIDDLGGR.A<br>R.TTSLVGLTAYDDRNR.I<br>R.VAIGAGVWNSPFGPFR.I<br>K.LVEDVESLSEIAGLFGYAFADINPEFR.R<br>K.ELGLRPSIFLQVGSVSVK.R<br>R.INSGLYFQENLEIER.K<br>K.FSDGDLKDEMATK.E<br>R.VDVFEINEGPK.S<br>R.FFGDTWMPR.V<br>K.ETGLTILSSNTSYDPR.L<br>R.VISAVAEITSNK.Q<br>R.TMDITFNVAESPR.T<br>R.FILNLSAEGGYHFGSAPPTSDK.V<br>K.SGDWYDAK.L<br>K.QDFITYVVEEGER.Y<br>K.LVEDVESLSEIAGLFGYAFADINPEFR.R<br>R.NISVGSYVR.R<br>R.LNEGDAFNISFVVKR.T<br>R.ATLDQALKDLAATELFK.D<br>K.HFNLGSR.F<br>R.SIYFFGQCDPLVAGR.Y<br>R.INSGLYFQENLEIERK.E<br>R.FLFGEPQHR.G<br>R.DLNSFNFDNDRR.T<br>R.GQIDDLGGR.A<br>R.FILNLSAEGGYHFGSAPPTSDKVR.L<br>K.MVSLDQNRVDVFEINEGPK.S<br>R.LSLFGATSGVQSTLDLVR.R<br>R.PAQLNAENAVAAFLAGR.I<br>R.VVDAEAPAAPSSLQDIFSVDTASR.A<br>R.RVWDAEAPAAPSSLQDIFSVDTASR.A<br>K.GLELEIHHLPVGLDR.I<br>R.VGVLTAACDVQELAR.L<br>K.ISVDSATMMNK.G<br>K.AALAGQIECARAGAAALVEAER.R<br>R.RADLWMAIAGTAGLAPMTALAAAGHDVALANK.E<br>R.LAIEFRPDVAVVADESICYLKA.A<br>K.EALVSAEGLMATAAR.A<br>R.ALAPDVVALIDNALDR.T                                                                                                                                                                                                                                                                                                                                                                                                                                                                                                                                                                                                                                                             |
| YP_616987 | Sala_1942 | hypothetical protein                                     | 49.33%            | 6                       | R.AALAALGPDQITVAELVPAIIDWAR.G<br>R.RFDAILVDVNGPDGLVR.A<br>K.AAALRPGGLLAWSAAPDR.F<br>R.VNLVIGDVAATIADAPR.R<br>R.LYSPVLAALAAKALR.P<br>K.LSVSTVFGVPIPK.Q<br>R.LLDLIDQR.A<br>R.GIDVSGVSHVINFEIPNVPEQVYVHR.I<br>R.AGAGIAISFIAPDRPFR.D<br>R.LDSQGDVILVATPGR.L<br>K.EIAGLADQFLNDPVTVSAPQATTAEK.V<br>R.LTGGVHTDATNASR.T<br>R.AALEAQSYQAHDLK.S<br>R.LLATVQLQGEDAR.V<br>R.LAVGTIESWLYR.L<br>R.AGGADHVAAGITNQRE<br>R.DGLGLLASASEGLAR.A<br>K.AFTFGAFILSASGATR.R<br>K.EAGHETAVQATSGLLDPYFSGSK.I<br>R.TMLFAADGTPLGSAQR.E<br>K.SAFADGVDWAELR.I<br>R.WYALEGSVYFVAGSLIK.W<br>R.ATNEPLAPVWQDR.R<br>K.MTDGTEYQTR.S<br>K.DIHPDYHMITVK.M<br>R.STWGSQGDVMTLEIDTAHPAWTGGQGR.M<br>R.MLDSGGQAK.F<br>R.FGGTLKR.<br>R.KVPVEGHLDLHTVLQAK.R<br>K.LVYFMGIDGK.F<br>R.LPNVSIAPVAGYQGLVQQR.N<br>R.ENNVITEAVTELNR.I<br>R.AAQFGAAAPATGNQPTTR.<br>R.TASQQIETTK.A<br>R.KTPQNQAALQAAKA.A<br>R.QAAQALGQISAPVDLAIAYVEDQISVR.M<br>K.KVDLLNPDVAVLAR.E<br>R.GQTLQAEINVLIAK.Y<br>K.TPQNQAALQAAKA.A<br>K.VDLLNPDVAVLAR.E<br>K.AQIDQQSR.G<br>R.NQQLMDAAR.A<br>R.TASQQIETTKAQIDQQSR.G<br>K.RQAAQALGQISAPVDLAIAYVEDQISVR.M<br>K.GVAVADR.V<br>R.VAARSNAFR.T<br>R.NQQLMDAAR.A<br>R.GQTLQAEINVLIAKYN.EAR.K<br>R.LEAQILSYLR.L<br>R.GQSASISQDFAGLGGSVK.Y<br>R.LSLGQQLQASVNYSSYSK.S<br>R.FAAYDPLNVIDTSDNDR.G<br>K.ETGLTILSSNTSYDPRLAYDQK.L<br>R.YSLNYDDVTLDL.S<br>R.VELDPLGTGAK.E<br>R.LNEGDAFNISFVVK.R<br>R.LFYLNTGYADR.V<br>K.SIELGTFEPFLDR.N<br>R.IDVNGNTLTHDK.V<br>R.IDFAVALR.K<br>R.FAAYDPLNVIDTSDNDRGQIDDLGGR.A<br>R.TTSLVGLTAYDDRNR.I<br>R.VAIGAGVWNSPFGPFR.I<br>K.LVEDVESLSEIAGLFGYAFADINPEFR.R<br>K.ELGLRPSIFLQVGSVSVK.R<br>R.INSGLYFQENLEIER.K<br>K.FSDGDLKDEMATK.E<br>R.VDVFEINEGPK.S<br>R.FFGDTWMPR.V<br>K.ETGLTILSSNTSYDPR.L<br>R.VISAVAEITSNK.Q<br>R.TMDITFNVAESPR.T<br>R.FILNLSAEGGYHFGSAPPTSDK.V<br>K.SGDWYDAK.L<br>K.QDFITYVVEEGER.Y<br>K.LVEDVESLSEIAGLFGYAFADINPEFR.R<br>R.NISVGSYVR.R<br>R.LNEGDAFNISFVVKR.T<br>R.ATLDQALKDLAATELFK.D<br>K.HFNLGSR.F<br>R.SIYFFGQCDPLVAGR.Y<br>R.INSGLYFQENLEIERK.E<br>R.FLFGEPQHR.G<br>R.DLNSFNFDNDRR.T<br>R.GQIDDLGGR.A<br>R.FILNLSAEGGYHFGSAPPTSDKVR.L<br>K.MVSLDQNRVDVFEINEGPK.S<br>R.LSLFGATSGVQSTLDLVR.R<br>R.PAQLNAENAVAAFLAGR.I<br>R.VVDAEAPAAPSSLQDIFSVDTASR.A<br>R.RVWDAEAPAAPSSLQDIFSVDTASR.A<br>K.GLELEIHHLPVGLDR.I<br>R.VGVLTAACDVQELAR.L<br>K.ISVDSATMMNK.G<br>K.AALAGQIECARAGAAALVEAER.R<br>R.RADLWMAIAGTAGLAPMTALAAAGHDVALANK.E<br>R.LAIEFRPDVAVVADESICYLKA.A<br>K.EALVSAEGLMATAAR.A<br>R.ALAPDVVALIDNALDR.T                                                                                                                                                                                                                                                                                                                                                                                                                                                                                                                                                                                                                                                                                                                                                                                                                                                                                                                                                                                         |
| YP_616992 | Sala_1947 | DEAD/DEAH box helicase-like protein                      | 23.75%            | 6                       | R.LLDLIDQR.A<br>R.GIDVSGVSHVINFEIPNVPEQVYVHR.I<br>R.AGAGIAISFIAPDRPFR.D<br>R.LDSQGDVILVATPGR.L<br>K.EIAGLADQFLNDPVTVSAPQATTAEK.V<br>R.LTGGVHTDATNASR.T<br>R.AALEAQSYQAHDLK.S<br>R.LLATVQLQGEDAR.V<br>R.LAVGTIESWLYR.L<br>R.AGGADHVAAGITNQRE<br>R.DGLGLLASASEGLAR.A<br>K.AFTFGAFILSASGATR.R<br>K.EAGHETAVQATSGLLDPYFSGSK.I<br>R.TMLFAADGTPLGSAQR.E<br>K.SAFADGVDWAELR.I<br>R.WYALEGSVYFVAGSLIK.W<br>R.ATNEPLAPVWQDR.R<br>K.MTDGTEYQTR.S<br>K.DIHPDYHMITVK.M<br>R.STWGSQGDVMTLEIDTAHPAWTGGQGR.M<br>R.MLDSGGQAK.F<br>R.FGGTLKR.<br>R.KVPVEGHLDLHTVLQAK.R<br>K.LVYFMGIDGK.F<br>R.LPNVSIAPVAGYQGLVQQR.N<br>R.ENNVITEAVTELNR.I<br>R.AAQFGAAAPATGNQPTTR.<br>R.TASQQIETTK.A<br>R.KTPQNQAALQAAKA.A<br>R.QAAQALGQISAPVDLAIAYVEDQISVR.M<br>K.KVDLLNPDVAVLAR.E<br>R.GQTLQAEINVLIAK.Y<br>K.TPQNQAALQAAKA.A<br>K.VDLLNPDVAVLAR.E<br>K.AQIDQQSR.G<br>R.NQQLMDAAR.A<br>R.TASQQIETTKAQIDQQSR.G<br>K.RQAAQALGQISAPVDLAIAYVEDQISVR.M<br>K.GVAVADR.V<br>R.VAARSNAFR.T<br>R.NQQLMDAAR.A<br>R.GQTLQAEINVLIAKYN.EAR.K<br>R.LEAQILSYLR.L<br>R.GQSASISQDFAGLGGSVK.Y<br>R.LSLGQQLQASVNYSSYSK.S<br>R.FAAYDPLNVIDTSDNDR.G<br>K.ETGLTILSSNTSYDPRLAYDQK.L<br>R.YSLNYDDVTLDL.S<br>R.VELDPLGTGAK.E<br>R.LNEGDAFNISFVVK.R<br>R.LFYLNTGYADR.V<br>K.SIELGTFEPFLDR.N<br>R.IDVNGNTLTHDK.V<br>R.IDFAVALR.K<br>R.FAAYDPLNVIDTSDNDRGQIDDLGGR.A<br>R.TTSLVGLTAYDDRNR.I<br>R.VAIGAGVWNSPFGPFR.I<br>K.LVEDVESLSEIAGLFGYAFADINPEFR.R<br>K.ELGLRPSIFLQVGSVSVK.R<br>R.INSGLYFQENLEIER.K<br>K.FSDGDLKDEMATK.E<br>R.VDVFEINEGPK.S<br>R.FFGDTWMPR.V<br>K.ETGLTILSSNTSYDPR.L<br>R.VISAVAEITSNK.Q<br>R.TMDITFNVAESPR.T<br>R.FILNLSAEGGYHFGSAPPTSDK.V<br>K.SGDWYDAK.L<br>K.QDFITYVVEEGER.Y<br>K.LVEDVESLSEIAGLFGYAFADINPEFR.R<br>R.NISVGSYVR.R<br>R.LNEGDAFNISFVVKR.T<br>R.ATLDQALKDLAATELFK.D<br>K.HFNLGSR.F<br>R.SIYFFGQCDPLVAGR.Y<br>R.INSGLYFQENLEIERK.E<br>R.FLFGEPQHR.G<br>R.DLNSFNFDNDRR.T<br>R.GQIDDLGGR.A<br>R.FILNLSAEGGYHFGSAPPTSDKVR.L<br>K.MVSLDQNRVDVFEINEGPK.S<br>R.LSLFGATSGVQSTLDLVR.R<br>R.PAQLNAENAVAAFLAGR.I<br>R.VVDAEAPAAPSSLQDIFSVDTASR.A<br>R.RVWDAEAPAAPSSLQDIFSVDTASR.A<br>K.GLELEIHHLPVGLDR.I<br>R.VGVLTAACDVQELAR.L<br>K.ISVDSATMMNK.G<br>K.AALAGQIECARAGAAALVEAER.R<br>R.RADLWMAIAGTAGLAPMTALAAAGHDVALANK.E<br>R.LAIEFRPDVAVVADESICYLKA.A<br>K.EALVSAEGLMATAAR.A<br>R.ALAPDVVALIDNALDR.T                                                                                                                                                                                                                                                                                                                                                                                                                                                                                                                                                                                                                                                                                                                                                                                                                                                                                                                                                                                                                                                                                                                                                  |
| YP_616993 | Sala_1948 | carbohydrate kinase, FGGY                                | 38.78%            | 12                      | R.LTGGVHTDATNASR.T<br>R.AALEAQSYQAHDLK.S<br>R.LLATVQLQGEDAR.V<br>R.LAVGTIESWLYR.L<br>R.AGGADHVAAGITNQRE<br>R.DGLGLLASASEGLAR.A<br>K.AFTFGAFILSASGATR.R<br>K.EAGHETAVQATSGLLDPYFSGSK.I<br>R.TMLFAADGTPLGSAQR.E<br>K.SAFADGVDWAELR.I<br>R.WYALEGSVYFVAGSLIK.W<br>R.ATNEPLAPVWQDR.R<br>K.MTDGTEYQTR.S<br>K.DIHPDYHMITVK.M<br>R.STWGSQGDVMTLEIDTAHPAWTGGQGR.M<br>R.MLDSGGQAK.F<br>R.FGGTLKR.<br>R.KVPVEGHLDLHTVLQAK.R<br>K.LVYFMGIDGK.F<br>R.LPNVSIAPVAGYQGLVQQR.N<br>R.ENNVITEAVTELNR.I<br>R.AAQFGAAAPATGNQPTTR.<br>R.TASQQIETTK.A<br>R.KTPQNQAALQAAKA.A<br>R.QAAQALGQISAPVDLAIAYVEDQISVR.M<br>K.KVDLLNPDVAVLAR.E<br>R.GQTLQAEINVLIAK.Y<br>K.TPQNQAALQAAKA.A<br>K.VDLLNPDVAVLAR.E<br>K.AQIDQQSR.G<br>R.NQQLMDAAR.A<br>R.TASQQIETTKAQIDQQSR.G<br>K.RQAAQALGQISAPVDLAIAYVEDQISVR.M<br>K.GVAVADR.V<br>R.VAARSNAFR.T<br>R.NQQLMDAAR.A<br>R.GQTLQAEINVLIAKYN.EAR.K<br>R.LEAQILSYLR.L<br>R.GQSASISQDFAGLGGSVK.Y<br>R.LSLGQQLQASVNYSSYSK.S<br>R.FAAYDPLNVIDTSDNDR.G<br>K.ETGLTILSSNTSYDPRLAYDQK.L<br>R.YSLNYDDVTLDL.S<br>R.VELDPLGTGAK.E<br>R.LNEGDAFNISFVVK.R<br>R.LFYLNTGYADR.V<br>K.SIELGTFEPFLDR.N<br>R.IDVNGNTLTHDK.V<br>R.IDFAVALR.K<br>R.FAAYDPLNVIDTSDNDRGQIDDLGGR.A<br>R.TTSLVGLTAYDDRNR.I<br>R.VAIGAGVWNSPFGPFR.I<br>K.LVEDVESLSEIAGLFGYAFADINPEFR.R<br>K.ELGLRPSIFLQVGSVSVK.R<br>R.INSGLYFQENLEIER.K<br>K.FSDGDLKDEMATK.E<br>R.VDVFEINEGPK.S<br>R.FFGDTWMPR.V<br>K.ETGLTILSSNTSYDPR.L<br>R.VISAVAEITSNK.Q<br>R.TMDITFNVAESPR.T<br>R.FILNLSAEGGYHFGSAPPTSDK.V<br>K.SGDWYDAK.L<br>K.QDFITYVVEEGER.Y<br>K.LVEDVESLSEIAGLFGYAFADINPEFR.R<br>R.NISVGSYVR.R<br>R.LNEGDAFNISFVVKR.T<br>R.ATLDQALKDLAATELFK.D<br>K.HFNLGSR.F<br>R.SIYFFGQCDPLVAGR.Y<br>R.INSGLYFQENLEIERK.E<br>R.FLFGEPQHR.G<br>R.DLNSFNFDNDRR.T<br>R.GQIDDLGGR.A<br>R.FILNLSAEGGYHFGSAPPTSDKVR.L<br>K.MVSLDQNRVDVFEINEGPK.S<br>R.LSLFGATSGVQSTLDLVR.R<br>R.PAQLNAENAVAAFLAGR.I<br>R.VVDAEAPAAPSSLQDIFSVDTASR.A<br>R.RVWDAEAPAAPSSLQDIFSVDTASR.A<br>K.GLELEIHHLPVGLDR.I<br>R.VGVLTAACDVQELAR.L<br>K.ISVDSATMMNK.G<br>K.AALAGQIECARAGAAALVEAER.R<br>R.RADLWMAIAGTAGLAPMTALAAAGHDVALANK.E<br>R.LAIEFRPDVAVVADESICYLKA.A<br>K.EALVSAEGLMATAAR.A<br>R.ALAPDVVALIDNALDR.T                                                                                                                                                                                                                                                                                                                                                                                                                                                                                                                                                                                                                                                                                                                                                                                                                                                                                                                                                                                                                                                                                                                                                                                                                                                                                      |
| YP_616994 | Sala_1949 | ribosomal protein L31                                    | 90.67%            | 5                       | K.MTDGTEYQTR.S<br>K.DIHPDYHMITVK.M<br>R.STWGSQGDVMTLEIDTAHPAWTGGQGR.M<br>R.MLDSGGQAK.F<br>R.FGGTLKR.<br>R.KVPVEGHLDLHTVLQAK.R<br>K.LVYFMGIDGK.F<br>R.LPNVSIAPVAGYQGLVQQR.N<br>R.ENNVITEAVTELNR.I<br>R.AAQFGAAAPATGNQPTTR.<br>R.TASQQIETTK.A<br>R.KTPQNQAALQAAKA.A<br>R.QAAQALGQISAPVDLAIAYVEDQISVR.M<br>K.KVDLLNPDVAVLAR.E<br>R.GQTLQAEINVLIAK.Y<br>K.TPQNQAALQAAKA.A<br>K.VDLLNPDVAVLAR.E<br>K.AQIDQQSR.G<br>R.NQQLMDAAR.A<br>R.TASQQIETTKAQIDQQSR.G<br>K.RQAAQALGQISAPVDLAIAYVEDQISVR.M<br>K.GVAVADR.V<br>R.VAARSNAFR.T<br>R.NQQLMDAAR.A<br>R.GQTLQAEINVLIAKYN.EAR.K<br>R.LEAQILSYLR.L<br>R.GQSASISQDFAGLGGSVK.Y<br>R.LSLGQQLQASVNYSSYSK.S<br>R.FAAYDPLNVIDTSDNDR.G<br>K.ETGLTILSSNTSYDPRLAYDQK.L<br>R.YSLNYDDVTLDL.S<br>R.VELDPLGTGAK.E<br>R.LNEGDAFNISFVVK.R<br>R.LFYLNTGYADR.V<br>K.SIELGTFEPFLDR.N<br>R.IDVNGNTLTHDK.V<br>R.IDFAVALR.K<br>R.FAAYDPLNVIDTSDNDRGQIDDLGGR.A<br>R.TTSLVGLTAYDDRNR.I<br>R.VAIGAGVWNSPFGPFR.I<br>K.LVEDVESLSEIAGLFGYAFADINPEFR.R<br>K.ELGLRPSIFLQVGSVSVK.R<br>R.INSGLYFQENLEIER.K<br>K.FSDGDLKDEMATK.E<br>R.VDVFEINEGPK.S<br>R.FFGDTWMPR.V<br>K.ETGLTILSSNTSYDPR.L<br>R.VISAVAEITSNK.Q<br>R.TMDITFNVAESPR.T<br>R.FILNLSAEGGYHFGSAPPTSDK.V<br>K.SGDWYDAK.L<br>K.QDFITYVVEEGER.Y<br>K.LVEDVESLSEIAGLFGYAFADINPEFR.R<br>R.NISVGSYVR.R<br>R.LNEGDAFNISFVVKR.T<br>R.ATLDQALKDLAATELFK.D<br>K.HFNLGSR.F<br>R.SIYFFGQCDPLVAGR.Y<br>R.INSGLYFQENLEIERK.E<br>R.FLFGEPQHR.G<br>R.DLNSFNFDNDRR.T<br>R.GQIDDLGGR.A<br>R.FILNLSAEGGYHFGSAPPTSDKVR.L<br>K.MVSLDQNRVDVFEINEGPK.S<br>R.LSLFGATSGVQSTLDLVR.R<br>R.PAQLNAENAVAAFLAGR.I<br>R.VVDAEAPAAPSSLQDIFSVDTASR.A<br>R.RVWDAEAPAAPSSLQDIFSVDTASR.A<br>K.GLELEIHHLPVGLDR.I<br>R.VGVLTAACDVQELAR.L<br>K.ISVDSATMMNK.G<br>K.AALAGQIECARAGAAALVEAER.R<br>R.RADLWMAIAGTAGLAPMTALAAAGHDVALANK.E<br>R.LAIEFRPDVAVVADESICYLKA.A<br>K.EALVSAEGLMATAAR.A<br>R.ALAPDVVALIDNALDR.T                                                                                                                                                                                                                                                                                                                                                                                                                                                                                                                                                                                                                                                                                                                                                                                                                                                                                                                                                                                                                                                                                                                                                                                                                                                                                                                                                                                                                                                                                                                                                                          |
| YP_616995 | Sala_1950 | beta-hydroxyacyl-(acyl-carrier-protein) dehydratase FabZ | 19.61%            | 2                       | R.LTGGVHTDATNASR.T<br>R.AALEAQSYQAHDLK.S<br>R.LLATVQLQGEDAR.V<br>R.LAVGTIESWLYR.L<br>R.AGGADHVAAGITNQRE<br>R.DGLGLLASASEGLAR.A<br>K.AFTFGAFILSASGATR.R<br>K.EAGHETAVQATSGLLDPYFSGSK.I<br>R.TMLFAADGTPLGSAQR.E<br>K.SAFADGVDWAELR.I<br>R.WYALEGSVYFVAGSLIK.W<br>R.ATNEPLAPVWQDR.R<br>K.MTDGTEYQTR.S<br>K.DIHPDYHMITVK.M<br>R.STWGSQGDVMTLEIDTAHPAWTGGQGR.M<br>R.MLDSGGQAK.F<br>R.FGGTLKR.<br>R.KVPVEGHLDLHTVLQAK.R<br>K.LVYFMGIDGK.F<br>R.LPNVSIAPVAGYQGLVQQR.N<br>R.ENNVITEAVTELNR.I<br>R.AAQFGAAAPATGNQPTTR.<br>R.TASQQIETTK.A<br>R.KTPQNQAALQAAKA.A<br>R.QAAQALGQISAPVDLAIAYVEDQISVR.M<br>K.KVDLLNPDVAVLAR.E<br>R.GQTLQAEINVLIAK.Y<br>K.TPQNQAALQAAKA.A<br>K.VDLLNPDVAVLAR.E<br>K.AQIDQQSR.G<br>R.NQQLMDAAR.A<br>R.TASQQIETTKAQIDQQSR.G<br>K.RQAAQALGQISAPVDLAIAYVEDQISVR.M<br>K.GVAVADR.V<br>R.VAARSNAFR.T<br>R.NQQLMDAAR.A<br>R.GQTLQAEINVLIAKYN.EAR.K<br>R.LEAQILSYLR.L<br>R.GQSASISQDFAGLGGSVK.Y<br>R.LSLGQQLQASVNYSSYSK.S<br>R.FAAYDPLNVIDTSDNDR.G<br>K.ETGLTILSSNTSYDPRLAYDQK.L<br>R.YSLNYDDVTLDL.S<br>R.VELDPLGTGAK.E<br>R.LNEGDAFNISFVVK.R<br>R.LFYLNTGYADR.V<br>K.SIELGTFEPFLDR.N<br>R.IDVNGNTLTHDK.V<br>R.IDFAVALR.K<br>R.FAAYDPLNVIDTSDNDRGQIDDLGGR.A<br>R.TTSLVGLTAYDDRNR.I<br>R.VAIGAGVWNSPFGPFR.I<br>K.LVEDVESLSEIAGLFGYAFADINPEFR.R<br>K.ELGLRPSIFLQVGSVSVK.R<br>R.INSGLYFQENLEIER.K<br>K.FSDGDLKDEMATK.E<br>R.VDVFEINEGPK.S<br>R.FFGDTWMPR.V<br>K.ETGLTILSSNTSYDPR.L<br>R.VISAVAEITSNK.Q<br>R.TMDITFNVAESPR.T<br>R.FILNLSAEGGYHFGSAPPTSDK.V<br>K.SGDWYDAK.L<br>K.QDFITYVVEEGER.Y<br>K.LVEDVESLSEIAGLFGYAFADINPEFR.R<br>R.NISVGSYVR.R<br>R.LNEGDAFNISFVVKR.T<br>R.ATLDQALKDLAATELFK.D<br>K.HFNLGSR.F<br>R.SIYFFGQCDPLVAGR.Y<br>R.INSGLYFQENLEIERK.E<br>R.FLFGEPQHR.G<br>R.DLNSFNFDNDRR.T<br>R.GQIDDLGGR.A<br>R.FILNLSAEGGYHFGSAPPTSDKVR.L<br>K.MVSLDQNRVDVFEINEGPK.S<br>R.LSLFGATSGVQSTLDLVR.R<br>R.PAQLNAENAVAAFLAGR.I<br>R.VVDAEAPAAPSSLQDIFSVDTASR.A<br>R.RVWDAEAPAAPSSLQDIFSVDTASR.A<br>K.GLELEIHHLPVGLDR.I<br>R.VGVLTAACDVQELAR.L<br>K.ISVDSATMMNK.G<br>K.AALAGQIECARAGAAALVEAER.R<br>R.RADLWMAIAGTAGLAPMTALAAAGHDVALANK.E<br>R.LAIEFRPDVAVVADESICYLKA.A<br>K.EALVSAEGLMATAAR.A<br>R.ALAPDVVALIDNALDR.T                                                                                                                                                                                                                                                                                                                                                                                                                                                                                                                                                                                                                                                                                                                                                                                                                                                                                                                                                                                                                                                                                                                                                                                                                                                                                      |
| YP_616996 | Sala_1951 | outer membrane chaperone Skp (OmpH)                      | 79.39%            | 18                      | R.LTGGVHTDATNASR.T<br>R.AALEAQSYQAHDLK.S<br>R.LLATVQLQGEDAR.V<br>R.LAVGTIESWLYR.L<br>R.AGGADHVAAGITNQRE<br>R.DGLGLLASASEGLAR.A<br>K.AFTFGAFILSASGATR.R<br>K.EAGHETAVQATSGLLDPYFSGSK.I<br>R.TMLFAADGTPLGSAQR.E<br>K.SAFADGVDWAELR.I<br>R.WYALEGSVYFVAGSLIK.W<br>R.ATNEPLAPVWQDR.R<br>K.MTDGTEYQTR.S<br>K.DIHPDYHMITVK.M<br>R.STWGSQGDVMTLEIDTAHPAWTGGQGR.M<br>R.MLDSGGQAK.F<br>R.FGGTLKR.<br>R.KVPVEGHLDLHTVLQAK.R<br>K.LVYFMGIDGK.F<br>R.LPNVSIAPVAGYQGLVQQR.N<br>R.ENNVITEAVTELNR.I<br>R.AAQFGAAAPATGNQPTTR.<br>R.TASQQIETTK.A<br>R.KTPQNQAALQAAKA.A<br>R.QAAQALGQISAPVDLAIAYVEDQISVR.M<br>K.KVDLLNPDVAVLAR.E<br>R.GQTLQAEINVLIAK.Y<br>K.TPQNQAALQAAKA.A<br>K.VDLLNPDVAVLAR.E<br>K.AQIDQQSR.G<br>R.NQQLMDAAR.A<br>R.TASQQIETTKAQIDQQSR.G<br>K.RQAAQALGQISAPVDLAIAYVEDQISVR.M<br>K.GVAVADR.V<br>R.VAARSNAFR.T<br>R.NQQLMDAAR.A<br>R.GQTLQAEINVLIAKYN.EAR.K<br>R.LEAQILSYLR.L<br>R.GQSASISQDFAGLGGSVK.Y<br>R.LSLGQQLQASVNYSSYSK.S<br>R.FAAYDPLNVIDTSDNDR.G<br>K.ETGLTILSSNTSYDPRLAYDQK.L<br>R.YSLNYDDVTLDL.S<br>R.VELDPLGTGAK.E<br>R.LNEGDAFNISFVVK.R<br>R.LFYLNTGYADR.V<br>K.SIELGTFEPFLDR.N<br>R.IDVNGNTLTHDK.V<br>R.IDFAVALR.K<br>R.FAAYDPLNVIDTSDNDRGQIDDLGGR.A<br>R.TTSLVGLTAYDDRNR.I<br>R.VAIGAGVWNSPFGPFR.I<br>K.LVEDVESLSEIAGLFGYAFADINPEFR.R<br>K.ELGLRPSIFLQVGSVSVK.R<br>R.INSGLYFQENLEIER.K<br>K.FSDGDLKDEMATK.E<br>R.VDVFEINEGPK.S<br>R.FFGDTWMPR.V<br>K.ETGLTILSSNTSYDPR.L<br>R.VISAVAEITSNK.Q<br>R.TMDITFNVAESPR.T<br>                                                                                                                                                                                                                                                                                                                                                                                                                                                                                                                                                                                                                                                                                                                                                                                                                                                                                                                                                                                                                                                                                                                                                                                                                                                                                                                                                                                                                                                                                                                                                                                                                                                                                                                                                                                                                                                                                                                                                                                |

| Accession | Locus tag | Description                                      | Sequence coverage | No. peptides identified | List of peptides identified                                                                                                                                                                                                                                                                                                                                                                                                                                                                                                                                                                                                                                                                                                                                                                                                                                                                                                                                                                                                                                                                                                                                                                                                                                                                                                                                                                                                                                                                                                                                                                                                                                                                                                                                                                                                                                                                                                                                                                                                                                                                                                                                                                                                                                                                                                                                                                                                                                                                                                                                                                                                                                                                                                                                                                                                                                                                                        |
|-----------|-----------|--------------------------------------------------|-------------------|-------------------------|--------------------------------------------------------------------------------------------------------------------------------------------------------------------------------------------------------------------------------------------------------------------------------------------------------------------------------------------------------------------------------------------------------------------------------------------------------------------------------------------------------------------------------------------------------------------------------------------------------------------------------------------------------------------------------------------------------------------------------------------------------------------------------------------------------------------------------------------------------------------------------------------------------------------------------------------------------------------------------------------------------------------------------------------------------------------------------------------------------------------------------------------------------------------------------------------------------------------------------------------------------------------------------------------------------------------------------------------------------------------------------------------------------------------------------------------------------------------------------------------------------------------------------------------------------------------------------------------------------------------------------------------------------------------------------------------------------------------------------------------------------------------------------------------------------------------------------------------------------------------------------------------------------------------------------------------------------------------------------------------------------------------------------------------------------------------------------------------------------------------------------------------------------------------------------------------------------------------------------------------------------------------------------------------------------------------------------------------------------------------------------------------------------------------------------------------------------------------------------------------------------------------------------------------------------------------------------------------------------------------------------------------------------------------------------------------------------------------------------------------------------------------------------------------------------------------------------------------------------------------------------------------------------------------|
| YP_617002 | Sala_1958 | ribosome recycling factor                        | 78.26%            | 15                      | R.FILSDLDEFAANDVK.L<br>R.AAGDLGLEAMTYAFSSSENK.R<br>R.AAANAAGGETAEIEAHLDTADMPPLDLLIR.T<br>R.TTLVAALNYGAQDELVR.A<br>R.HVAIIMDGNR.W<br>K.LTDATIAEIDAATAK.E<br>R.ANAALLDPVTVEVYGSQMPLNQIASISVPEPR.M<br>R.SAGLGNPVDGQMLR.L<br>K.RHETEYQK.L<br>R.HETEYQKLTDAIEIDAATAK.E<br>R.MLSVQVWDK.A<br>K.LAGQYAEK.A<br>R.MLSVQVWDK.A<br>R.MHGAVESLKHDLAQLR.L<br>R.ANAALLDPVTVEVYGSQMPLNQIASISVPEPR.M<br>R.SAGLGNPVDGQMLR.L<br>R.LPPEPTQER.R<br>R.KRHETEYQK.L<br>R.DGMNLIKQDENKK.E<br>K.EISEDERK.R                                                                                                                                                                                                                                                                                                                                                                                                                                                                                                                                                                                                                                                                                                                                                                                                                                                                                                                                                                                                                                                                                                                                                                                                                                                                                                                                                                                                                                                                                                                                                                                                                                                                                                                                                                                                                                                                                                                                                                                                                                                                                                                                                                                                                                                                                                                                                                                                                                   |
| YP_617003 | Sala_1958 | Uridylate kinase                                 | 52.70%            | 9                       | R.VVIFAAGVGAPYFTTDSGAALR.A<br>R.VLAGEGVSTVVGDGAV.<br>K.GTSDGVYVADPK.Q<br>K.LSGEALMGSPFGIDPETVASMAAEVK.E<br>R.DNHIPVVFNR.E<br>R.AQADYMGMLATVMNALAMQNALEQLGVQTR.V<br>K.LSGEALMGSPFGIDPETVASMAAEVK.E<br>R.AQADYMGMLATVMNALAMQNALEQLGVQTR.V<br>K.GTSDGVYVADPKQDANVR.Y<br>R.FQLGEGIEEESDFAAEVAAGV.<br>K.TPVAEVAAAGK.D<br>K.AAQSGKPAEIVAK.M<br>R.VAAEGLVGFATDGT.R.G<br>K.IGVLVALESSAGADVLEPLGK.Q<br>K.ALAENNGDIEASIDWLR.T<br>R.GALVEVNSETFVGNQFQAFVR.D<br>K.ENALLSOLFVMDGKTPVAEVAAAGK.D<br>K.QLAMHVAANPLANGDDLDADLVAR.E<br>K.DVGAATLK.G<br>K.ENALLSOLFVMDGK.T<br>R.VALLTVNSGAVTGYVHNAAPGMGK.I<br>R.GALVEVNSETFVGNK.N<br>K.NEQFQAFVR.D<br>K.KALAEENGDIEASIDWLR.T<br>K.TPVAEVAAAGKDVGAATLK.G<br>R.RVALLTVNSGAVTGYVHNAAPGMGK.I<br>R.KENALLSOLFVMDGK.T<br>K.EESDFAAEVAAGV.<br>R.VALLTVNSGAVTGYVHNAAPGMGK.I<br>K.QLAMHVAANPLANGDDLDADLVAR.E<br>K.ENALLSOLFVMDGK.T<br>R.TKGLAAAK.K<br>R.TGAGMDCCK.A<br>R.KENALLSOLFVMDGKTPVAEVAAAGK.D<br>K.ENALLSOLFVMDGKTPVAEVAAAGK.D<br>R.ALDFIATAASGGK.V<br>R.NGIIHILDLSQTVPLFAR.A<br>K.TLEEQSGDTSGLTKK.E<br>K.EANVLGIPVVAALDSNVSPDGIAPFPVANDDAAR.A<br>R.ASQGHVNR.W<br>K.TLEEQSGDTSGLTK.K<br>R.QAQGPIADAAR.A<br>R.WLGGMLTNWK.T<br>R.LKTLLEEQSGDTSGLTK.K<br>R.RDGEDLGAAPVPAEPALEAAAPVTEDEQVPAEAAETER.Q<br>R.DMGGIPDVMFVIDANKEELAIAK.E<br>K.RAQGPIADAAR.A<br>R.DKLEMSLGGIR.D<br>K.VLFPVTK.R<br>K.LEMSLGGIR.D<br>R.WLGGMLTNWK.T<br>R.LYCDAVAQAATR.G<br>R.LKTLLEEQSGDTSGLTKK.E<br>R.ERDKLEMSLGGIR.D<br>K.TISNSIKR.L<br>R.MKPPIFGAR.N<br>R.DMGGIPDVMFVIDANKEELAIAK.E<br>R.DKLEMSLGGIR.D<br>K.KEVLNK.T<br>K.EVLNK.T<br>R.IGFTQIAGLVAR.R<br>K.FVNADLDKASEENER.Q<br>R.VIFMSVDFVHNR.T<br>R.RIMPFVMSGSELATQR.V<br>K.TVESEAHTVT.R.H<br>K.ATSTNPISAFVATGGLK.H<br>R.FKDFEIVFAEFK.V<br>R.GKLDNAALVK.F<br>R.ASLNYGLAR.E<br>R.NILGGVWFREPVMK.N<br>K.VANPVVLDGDEMTR.I<br>K.VQFDALGIVEHR.L<br>R.HAFGDQYK.A<br>R.IIWQWIR.E<br>K.ATDFRVPQCK.L<br>R.TDDKITVEANAIAK.K<br>R.LVPGWTDPIVGR.H<br>R.LIDDMVASALK.W<br>R.NILGGVWFR.E<br>R.EWPVYLSK.N<br>K.NYDGDVQSDTVAQGFGLSGLMTSVLMTDPDGK.T<br>K.DIFEVFNK.V<br>R.LIILPDLIDLHYDLGIEER.D<br>R.LVFEGEDGTLIDEEVFQFPSSGVAMGNLDDSI.R.D<br>K.LDDNAALVK.F<br>R.LVFEGEDGTLIDEEVFQFPSSGVAMGNLDDSI.RDFAR.A<br>R.ERLIPYLDIDLHYDLGIEER.D<br>K.DALLIGDQNWLTGFFAIVENLDKK.M<br>R.VEEFLK.M<br>R.TDDKITVEANAIAK.K<br>R.NILGGVWFREPVMK.N<br>R.LIDDMVASALK.W<br>K.VANPVVLDGDEMTR.I<br>K.KYGVGVK.C<br>K.FADDLEKVCVAVESGK.M<br>R.DRTDDKITVEANAIAK.K<br>K.VCVAVESGK.M<br>K.NYDGDVQSDTVAQGFGLSGLMTSVLMTDPDGK.T<br>K.NYDGDVQSDTVAQGFGLSGLMTSVLMTDPDGK.T<br>K.FADDLEK.V<br>R.LAAEADFGQLPSLQPGSIVATAPLPLR.A<br>R.PPSQADIDRETNIEIAFLK.E<br>R.ISELVAEER.G<br>K.ATAASVGAHHR.W<br>R.VLITPTISAGNGAVLAALK.A<br>R.IGLTGYELNDATPNAVLER.H<br>R.DJAADVAVRVSADLAR.N<br>K.QAGNSDWLVYGS DIPR.D<br>K.ILTESFGALAPR.A<br>R.SADVTAASIVPLSDWK.A<br>R.IELNSGVTALVSNK.I<br>R.IADATNAHLFAGQLLGDSPIGTTASLGK.A<br>R.AVIVVGGDPATFAR.L<br>R.SVAADAPNLLWTGDYALVAGSGIPWQNEIDQLTNGR.Q<br>R.RIDTVENTR.R<br>R.GEQQAAMTAWPTGGGR.T |
| YP_617004 | Sala_1959 | translation elongation factor Ts                 | 75.97%            | 26                      | R.VVIFAAGVGAPYFTTDSGAALR.A<br>R.VLAGEGVSTVVGDGAV.<br>K.GTSDGVYVADPK.Q<br>K.LSGEALMGSPFGIDPETVASMAAEVK.E<br>R.DNHIPVVFNR.E<br>R.AQADYMGMLATVMNALAMQNALEQLGVQTR.V<br>K.LSGEALMGSPFGIDPETVASMAAEVK.E<br>R.AQADYMGMLATVMNALAMQNALEQLGVQTR.V<br>K.GTSDGVYVADPKQDANVR.Y<br>R.FQLGEGIEEESDFAAEVAAGV.<br>K.TPVAEVAAAGK.D<br>K.AAQSGKPAEIVAK.M<br>R.VAAEGLVGFATDGT.R.G<br>K.IGVLVALESSAGADVLEPLGK.Q<br>K.ALAENNGDIEASIDWLR.T<br>R.GALVEVNSETFVGNQFQAFVR.D<br>K.ENALLSOLFVMDGKTPVAEVAAAGK.D<br>K.QLAMHVAANPLANGDDLDADLVAR.E<br>K.DVGAATLK.G<br>K.ENALLSOLFVMDGK.T<br>R.VALLTVNSGAVTGYVHNAAPGMGK.I<br>R.GALVEVNSETFVGNK.N<br>K.NEQFQAFVR.D<br>K.KALAEENGDIEASIDWLR.T<br>K.TPVAEVAAAGKDVGAATLK.G<br>R.RVALLTVNSGAVTGYVHNAAPGMGK.I<br>R.KENALLSOLFVMDGK.T<br>K.EESDFAAEVAAGV.<br>R.VALLTVNSGAVTGYVHNAAPGMGK.I<br>K.QLAMHVAANPLANGDDLDADLVAR.E<br>K.ENALLSOLFVMDGK.T<br>R.TKGLAAAK.K<br>R.TGAGMDCCK.A<br>R.KENALLSOLFVMDGKTPVAEVAAAGK.D<br>K.ENALLSOLFVMDGKTPVAEVAAAGK.D<br>R.ALDFIATAASGGK.V<br>R.NGIIHILDLSQTVPLFAR.A<br>K.TLEEQSGDTSGLTKK.E<br>K.EANVLGIPVVAALDSNVSPDGIAPFPVANDDAAR.A<br>R.ASQGHVNR.W<br>K.TLEEQSGDTSGLTK.K<br>R.QAQGPIADAAR.A<br>R.WLGGMLTNWK.T<br>R.LKTLLEEQSGDTSGLTK.K<br>R.RDGEDLGAAPVPAEPALEAAAPVTEDEQVPAEAAETER.Q<br>R.DMGGIPDVMFVIDANKEELAIAK.E<br>K.RAQGPIADAAR.A<br>R.DKLEMSLGGIR.D<br>K.VLFPVTK.R<br>K.LEMSLGGIR.D<br>R.WLGGMLTNWK.T<br>R.LYCDAVAQAATR.G<br>R.LKTLLEEQSGDTSGLTKK.E<br>R.ERDKLEMSLGGIR.D<br>K.TISNSIKR.L<br>R.MKPPIFGAR.N<br>R.DMGGIPDVMFVIDANKEELAIAK.E<br>R.DKLEMSLGGIR.D<br>K.KEVLNK.T<br>K.EVLNK.T<br>R.IGFTQIAGLVAR.R<br>K.FVNADLDKASEENER.Q<br>R.VIFMSVDFVHNR.T<br>R.RIMPFVMSGSELATQR.V<br>K.TVESEAHTVT.R.H<br>K.ATSTNPISAFVATGGLK.H<br>R.FKDFEIVFAEFK.V<br>R.GKLDNAALVK.F<br>R.ASLNYGLAR.E<br>R.NILGGVWFREPVMK.N<br>K.VANPVVLDGDEMTR.I<br>K.VQFDALGIVEHR.L<br>R.HAFGDQYK.A<br>R.IIWQWIR.E<br>K.ATDFRVPQCK.L<br>R.TDDKITVEANAIAK.K<br>R.LVPGWTDPIVGR.H<br>R.LIDDMVASALK.W<br>R.NILGGVWFR.E<br>R.EWPVYLSK.N<br>K.NYDGDVQSDTVAQGFGLSGLMTSVLMTDPDGK.T<br>K.DIFEVFNK.V<br>R.LIILPDLIDLHYDLGIEER.D<br>R.LVFEGEDGTLIDEEVFQFPSSGVAMGNLDDSI.R.D<br>K.LDDNAALVK.F<br>R.LVFEGEDGTLIDEEVFQFPSSGVAMGNLDDSI.RDFAR.A<br>R.ERLIPYLDIDLHYDLGIEER.D<br>K.DALLIGDQNWLTGFFAIVENLDKK.M<br>R.VEEFLK.M<br>R.TDDKITVEANAIAK.K<br>R.NILGGVWFREPVMK.N<br>R.LIDDMVASALK.W<br>K.VANPVVLDGDEMTR.I<br>K.KYGVGVK.C<br>K.FADDLEKVCVAVESGK.M<br>R.DRTDDKITVEANAIAK.K<br>K.VCVAVESGK.M<br>K.NYDGDVQSDTVAQGFGLSGLMTSVLMTDPDGK.T<br>K.NYDGDVQSDTVAQGFGLSGLMTSVLMTDPDGK.T<br>K.FADDLEK.V<br>R.LAAEADFGQLPSLQPGSIVATAPLPLR.A<br>R.PPSQADIDRETNIEIAFLK.E<br>R.ISELVAEER.G<br>K.ATAASVGAHHR.W<br>R.VLITPTISAGNGAVLAALK.A<br>R.IGLTGYELNDATPNAVLER.H<br>R.DJAADVAVRVSADLAR.N<br>K.QAGNSDWLVYGS DIPR.D<br>K.ILTESFGALAPR.A<br>R.SADVTAASIVPLSDWK.A<br>R.IELNSGVTALVSNK.I<br>R.IADATNAHLFAGQLLGDSPIGTTASLGK.A<br>R.AVIVVGGDPATFAR.L<br>R.SVAADAPNLLWTGDYALVAGSGIPWQNEIDQLTNGR.Q<br>R.RIDTVENTR.R<br>R.GEQQAAMTAWPTGGGR.T |
| YP_617005 | Sala_1960 | ribosomal protein S2                             | 84.84%            | 26                      | R.VVIFAAGVGAPYFTTDSGAALR.A<br>R.VLAGEGVSTVVGDGAV.<br>K.GTSDGVYVADPK.Q<br>K.LSGEALMGSPFGIDPETVASMAAEVK.E<br>R.DNHIPVVFNR.E<br>R.AQADYMGMLATVMNALAMQNALEQLGVQTR.V<br>K.LSGEALMGSPFGIDPETVASMAAEVK.E<br>R.AQADYMGMLATVMNALAMQNALEQLGVQTR.V<br>K.GTSDGVYVADPKQDANVR.Y<br>R.FQLGEGIEEESDFAAEVAAGV.<br>K.TPVAEVAAAGK.D<br>K.AAQSGKPAEIVAK.M<br>R.VAAEGLVGFATDGT.R.G<br>K.IGVLVALESSAGADVLEPLGK.Q<br>K.ALAENNGDIEASIDWLR.T<br>R.GALVEVNSETFVGNQFQAFVR.D<br>K.ENALLSOLFVMDGKTPVAEVAAAGK.D<br>K.QLAMHVAANPLANGDDLDADLVAR.E<br>K.DVGAATLK.G<br>K.ENALLSOLFVMDGK.T<br>R.VALLTVNSGAVTGYVHNAAPGMGK.I<br>R.GALVEVNSETFVGNK.N<br>K.NEQFQAFVR.D<br>K.KALAEENGDIEASIDWLR.T<br>K.TPVAEVAAAGKDVGAATLK.G<br>R.RVALLTVNSGAVTGYVHNAAPGMGK.I<br>R.KENALLSOLFVMDGK.T<br>K.EESDFAAEVAAGV.<br>R.VALLTVNSGAVTGYVHNAAPGMGK.I<br>K.QLAMHVAANPLANGDDLDADLVAR.E<br>K.ENALLSOLFVMDGK.T<br>R.TKGLAAAK.K<br>R.TGAGMDCCK.A<br>R.KENALLSOLFVMDGKTPVAEVAAAGK.D<br>K.ENALLSOLFVMDGKTPVAEVAAAGK.D<br>R.ALDFIATAASGGK.V<br>R.NGIIHILDLSQTVPLFAR.A<br>K.TLEEQSGDTSGLTKK.E<br>K.EANVLGIPVVAALDSNVSPDGIAPFPVANDDAAR.A<br>R.ASQGHVNR.W<br>K.TLEEQSGDTSGLTK.K<br>R.QAQGPIADAAR.A<br>R.WLGGMLTNWK.T<br>R.LKTLLEEQSGDTSGLTK.K<br>R.RDGEDLGAAPVPAEPALEAAAPVTEDEQVPAEAAETER.Q<br>R.DMGGIPDVMFVIDANKEELAIAK.E<br>K.RAQGPIADAAR.A<br>R.DKLEMSLGGIR.D<br>K.VLFPVTK.R<br>K.LEMSLGGIR.D<br>R.WLGGMLTNWK.T<br>R.LYCDAVAQAATR.G<br>R.LKTLLEEQSGDTSGLTKK.E<br>R.ERDKLEMSLGGIR.D<br>K.TISNSIKR.L<br>R.MKPPIFGAR.N<br>R.DMGGIPDVMFVIDANKEELAIAK.E<br>R.DKLEMSLGGIR.D<br>K.KEVLNK.T<br>K.EVLNK.T<br>R.IGFTQIAGLVAR.R<br>K.FVNADLDKASEENER.Q<br>R.VIFMSVDFVHNR.T<br>R.RIMPFVMSGSELATQR.V<br>K.TVESEAHTVT.R.H<br>K.ATSTNPISAFVATGGLK.H<br>R.FKDFEIVFAEFK.V<br>R.GKLDNAALVK.F<br>R.ASLNYGLAR.E<br>R.NILGGVWFREPVMK.N<br>K.VANPVVLDGDEMTR.I<br>K.VQFDALGIVEHR.L<br>R.HAFGDQYK.A<br>R.IIWQWIR.E<br>K.ATDFRVPQCK.L<br>R.TDDKITVEANAIAK.K<br>R.LVPGWTDPIVGR.H<br>R.LIDDMVASALK.W<br>R.NILGGVWFR.E<br>R.EWPVYLSK.N<br>K.NYDGDVQSDTVAQGFGLSGLMTSVLMTDPDGK.T<br>K.DIFEVFNK.V<br>R.LIILPDLIDLHYDLGIEER.D<br>R.LVFEGEDGTLIDEEVFQFPSSGVAMGNLDDSI.R.D<br>K.LDDNAALVK.F<br>R.LVFEGEDGTLIDEEVFQFPSSGVAMGNLDDSI.RDFAR.A<br>R.ERLIPYLDIDLHYDLGIEER.D<br>K.DALLIGDQNWLTGFFAIVENLDKK.M<br>R.VEEFLK.M<br>R.TDDKITVEANAIAK.K<br>R.NILGGVWFREPVMK.N<br>R.LIDDMVASALK.W<br>K.VANPVVLDGDEMTR.I<br>K.KYGVGVK.C<br>K.FADDLEKVCVAVESGK.M<br>R.DRTDDKITVEANAIAK.K<br>K.VCVAVESGK.M<br>K.NYDGDVQSDTVAQGFGLSGLMTSVLMTDPDGK.T<br>K.NYDGDVQSDTVAQGFGLSGLMTSVLMTDPDGK.T<br>K.FADDLEK.V<br>R.LAAEADFGQLPSLQPGSIVATAPLPLR.A<br>R.PPSQADIDRETNIEIAFLK.E<br>R.ISELVAEER.G<br>K.ATAASVGAHHR.W<br>R.VLITPTISAGNGAVLAALK.A<br>R.IGLTGYELNDATPNAVLER.H<br>R.DJAADVAVRVSADLAR.N<br>K.QAGNSDWLVYGS DIPR.D<br>K.ILTESFGALAPR.A<br>R.SADVTAASIVPLSDWK.A<br>R.IELNSGVTALVSNK.I<br>R.IADATNAHLFAGQLLGDSPIGTTASLGK.A<br>R.AVIVVGGDPATFAR.L<br>R.SVAADAPNLLWTGDYALVAGSGIPWQNEIDQLTNGR.Q<br>R.RIDTVENTR.R<br>R.GEQQAAMTAWPTGGGR.T |
| YP_617008 | Sala_1963 | Phosphatidylserine decarboxylase-related protein | 22.14%            | 4                       | R.VVIFAAGVGAPYFTTDSGAALR.A<br>R.VLAGEGVSTVVGDGAV.<br>K.GTSDGVYVADPK.Q<br>K.LSGEALMGSPFGIDPETVASMAAEVK.E<br>R.DNHIPVVFNR.E<br>R.AQADYMGMLATVMNALAMQNALEQLGVQTR.V<br>K.LSGEALMGSPFGIDPETVASMAAEVK.E<br>R.AQADYMGMLATVMNALAMQNALEQLGVQTR.V<br>K.GTSDGVYVADPKQDANVR.Y<br>R.FQLGEGIEEESDFAAEVAAGV.<br>K.TPVAEVAAAGK.D<br>K.AAQSGKPAEIVAK.M<br>R.VAAEGLVGFATDGT.R.G<br>K.IGVLVALESSAGADVLEPLGK.Q<br>K.ALAENNGDIEASIDWLR.T<br>R.GALVEVNSETFVGNQFQAFVR.D<br>K.ENALLSOLFVMDGKTPVAEVAAAGK.D<br>K.QLAMHVAANPLANGDDLDADLVAR.E<br>K.DVGAATLK.G<br>K.ENALLSOLFVMDGK.T<br>R.VALLTVNSGAVTGYVHNAAPGMGK.I<br>R.GALVEVNSETFVGNK.N<br>K.NEQFQAFVR.D<br>K.KALAEENGDIEASIDWLR.T<br>K.TPVAEVAAAGKDVGAATLK.G<br>R.RVALLTVNSGAVTGYVHNAAPGMGK.I<br>R.KENALLSOLFVMDGK.T<br>K.EESDFAAEVAAGV.<br>R.VALLTVNSGAVTGYVHNAAPGMGK.I<br>K.QLAMHVAANPLANGDDLDADLVAR.E<br>K.ENALLSOLFVMDGK.T<br>R.TKGLAAAK.K<br>R.TGAGMDCCK.A<br>R.KENALLSOLFVMDGKTPVAEVAAAGK.D<br>K.ENALLSOLFVMDGKTPVAEVAAAGK.D<br>R.ALDFIATAASGGK.V<br>R.NGIIHILDLSQTVPLFAR.A<br>K.TLEEQSGDTSGLTKK.E<br>K.EANVLGIPVVAALDSNVSPDGIAPFPVANDDAAR.A<br>R.ASQGHVNR.W<br>K.TLEEQSGDTSGLTK.K<br>R.QAQGPIADAAR.A<br>R.WLGGMLTNWK.T<br>R.LKTLLEEQSGDTSGLTK.K<br>R.RDGEDLGAAPVPAEPALEAAAPVTEDEQVPAEAAETER.Q<br>R.DMGGIPDVMFVIDANKEELAIAK.E<br>K.RAQGPIADAAR.A<br>R.DKLEMSLGGIR.D<br>K.VLFPVTK.R<br>K.LEMSLGGIR.D<br>R.WLGGMLTNWK.T<br>R.LYCDAVAQAATR.G<br>R.LKTLLEEQSGDTSGLTKK.E<br>R.ERDKLEMSLGGIR.D<br>K.TISNSIKR.L<br>R.MKPPIFGAR.N<br>R.DMGGIPDVMFVIDANKEELAIAK.E<br>R.DKLEMSLGGIR.D<br>K.KEVLNK.T<br>K.EVLNK.T<br>R.IGFTQIAGLVAR.R<br>K.FVNADLDKASEENER.Q<br>R.VIFMSVDFVHNR.T<br>R.RIMPFVMSGSELATQR.V<br>K.TVESEAHTVT.R.H<br>K.ATSTNPISAFVATGGLK.H<br>R.FKDFEIVFAEFK.V<br>R.GKLDNAALVK.F<br>R.ASLNYGLAR.E<br>R.NILGGVWFREPVMK.N<br>K.VANPVVLDGDEMTR.I<br>K.VQFDALGIVEHR.L<br>R.HAFGDQYK.A<br>R.IIWQWIR.E<br>K.ATDFRVPQCK.L<br>R.TDDKITVEANAIAK.K<br>R.LVPGWTDPIVGR.H<br>R.LIDDMVASALK.W<br>R.NILGGVWFR.E<br>R.EWPVYLSK.N<br>K.NYDGDVQSDTVAQGFGLSGLMTSVLMTDPDGK.T<br>K.DIFEVFNK.V<br>R.LIILPDLIDLHYDLGIEER.D<br>R.LVFEGEDGTLIDEEVFQFPSSGVAMGNLDDSI.R.D<br>K.LDDNAALVK.F<br>R.LVFEGEDGTLIDEEVFQFPSSGVAMGNLDDSI.RDFAR.A<br>R.ERLIPYLDIDLHYDLGIEER.D<br>K.DALLIGDQNWLTGFFAIVENLDKK.M<br>R.VEEFLK.M<br>R.TDDKITVEANAIAK.K<br>R.NILGGVWFREPVMK.N<br>R.LIDDMVASALK.W<br>K.VANPVVLDGDEMTR.I<br>K.KYGVGVK.C<br>K.FADDLEKVCVAVESGK.M<br>R.DRTDDKITVEANAIAK.K<br>K.VCVAVESGK.M<br>K.NYDGDVQSDTVAQGFGLSGLMTSVLMTDPDGK.T<br>K.NYDGDVQSDTVAQGFGLSGLMTSVLMTDPDGK.T<br>K.FADDLEK.V<br>R.LAAEADFGQLPSLQPGSIVATAPLPLR.A<br>R.PPSQADIDRETNIEIAFLK.E<br>R.ISELVAEER.G<br>K.ATAASVGAHHR.W<br>R.VLITPTISAGNGAVLAALK.A<br>R.IGLTGYELNDATPNAVLER.H<br>R.DJAADVAVRVSADLAR.N<br>K.QAGNSDWLVYGS DIPR.D<br>K.ILTESFGALAPR.A<br>R.SADVTAASIVPLSDWK.A<br>R.IELNSGVTALVSNK.I<br>R.IADATNAHLFAGQLLGDSPIGTTASLGK.A<br>R.AVIVVGGDPATFAR.L<br>R.SVAADAPNLLWTGDYALVAGSGIPWQNEIDQLTNGR.Q<br>R.RIDTVENTR.R<br>R.GEQQAAMTAWPTGGGR.T |
| YP_617009 | Sala_1964 | isocitrate dehydrogenase, NADP-dependent         | 86.88%            | 36                      | R.VVIFAAGVGAPYFTTDSGAALR.A<br>R.VLAGEGVSTVVGDGAV.<br>K.GTSDGVYVADPK.Q<br>K.LSGEALMGSPFGIDPETVASMAAEVK.E<br>R.DNHIPVVFNR.E<br>R.AQADYMGMLATVMNALAMQNALEQLGVQTR.V<br>K.LSGEALMGSPFGIDPETVASMAAEVK.E<br>R.AQADYMGMLATVMNALAMQNALEQLGVQTR.V<br>K.GTSDGVYVADPKQDANVR.Y<br>R.FQLGEGIEEESDFAAEVAAGV.<br>K.TPVAEVAAAGK.D<br>K.AAQSGKPAEIVAK.M<br>R.VAAEGLVGFATDGT.R.G<br>K.IGVLVALESSAGADVLEPLGK.Q<br>K.ALAENNGDIEASIDWLR.T<br>R.GALVEVNSETFVGNQFQAFVR.D<br>K.ENALLSOLFVMDGKTPVAEVAAAGK.D<br>K.QLAMHVAANPLANGDDLDADLVAR.E<br>K.DVGAATLK.G<br>K.ENALLSOLFVMDGK.T<br>R.VALLTVNSGAVTGYVHNAAPGMGK.I<br>R.GALVEVNSETFVGNK.N<br>K.NEQFQAFVR.D<br>K.KALAEENGDIEASIDWLR.T<br>K.TPVAEVAAAGKDVGAATLK.G<br>R.RVALLTVNSGAVTGYVHNAAPGMGK.I<br>R.KENALLSOLFVMDGK.T<br>K.EESDFAAEVAAGV.<br>R.VALLTVNSGAVTGYVHNAAPGMGK.I<br>K.QLAMHVAANPLANGDDLDADLVAR.E<br>K.ENALLSOLFVMDGK.T<br>R.TKGLAAAK.K<br>R.TGAGMDCCK.A<br>R.KENALLSOLFVMDGKTPVAEVAAAGK.D<br>K.ENALLSOLFVMDGKTPVAEVAAAGK.D<br>R.ALDFIATAASGGK.V<br>R.NGIIHILDLSQTVPLFAR.A<br>K.TLEEQSGDTSGLTKK.E<br>K.EANVLGIPVVAALDSNVSPDGIAPFPVANDDAAR.A<br>R.ASQGHVNR.W<br>K.TLEEQSGDTSGLTK.K<br>R.QAQGPIADAAR.A<br>R.WLGGMLTNWK.T<br>R.LKTLLEEQSGDTSGLTK.K<br>R.RDGEDLGAAPVPAEPALEAAAPVTEDEQVPAEAAETER.Q<br>R.DMGGIPDVMFVIDANKEELAIAK.E<br>K.RAQGPIADAAR.A<br>R.DKLEMSLGGIR.D<br>K.VLFPVTK.R<br>K.LEMSLGGIR.D<br>R.WLGGMLTNWK.T<br>R.LYCDAVAQAATR.G<br>R.LKTLLEEQSGDTSGLTKK.E<br>R.ERDKLEMSLGGIR.D<br>K.TISNSIKR.L<br>R.MKPPIFGAR.N<br>R.DMGGIPDVMFVIDANKEELAIAK.E<br>R.DKLEMSLGGIR.D<br>K.KEVLNK.T<br>K.EVLNK.T<br>R.IGFTQIAGLVAR.R<br>K.FVNADLDKASEENER.Q<br>R.VIFMSVDFVHNR.T<br>R.RIMPFVMSGSELATQR.V<br>K.TVESEAHTVT.R.H<br>K.ATSTNPISAFVATGGLK.H<br>R.FKDFEIVFAEFK.V<br>R.GKLDNAALVK.F<br>R.ASLNYGLAR.E<br>R.NILGGVWFREPVMK.N<br>K.VANPVVLDGDEMTR.I<br>K.VQFDALGIVEHR.L<br>R.HAFGDQYK.A<br>R.IIWQWIR.E<br>K.ATDFRVPQCK.L<br>R.TDDKITVEANAIAK.K<br>R.LVPGWTDPIVGR.H<br>R.LIDDMVASALK.W<br>R.NILGGVWFR.E<br>R.EWPVYLSK.N<br>K.NYDGDVQSDTVAQGFGLSGLMTSVLMTDPDGK.T<br>K.DIFEVFNK.V<br>R.LIILPDLIDLHYDLGIEER.D<br>R.LVFEGEDGTLIDEEVFQFPSSGVAMGNLDDSI.R.D<br>K.LDDNAALVK.F<br>R.LVFEGEDGTLIDEEVFQFPSSGVAMGNLDDSI.RDFAR.A<br>R.ERLIPYLDIDLHYDLGIEER.D<br>K.DALLIGDQNWLTGFFAIVENLDKK.M<br>R.VEEFLK.M<br>R.TDDKITVEANAIAK.K<br>R.NILGGVWFREPVMK.N<br>R.LIDDMVASALK.W<br>K.VANPVVLDGDEMTR.I<br>K.KYGVGVK.C<br>K.FADDLEKVCVAVESGK.M<br>R.DRTDDKITVEANAIAK.K<br>K.VCVAVESGK.M<br>K.NYDGDVQSDTVAQGFGLSGLMTSVLMTDPDGK.T<br>K.NYDGDVQSDTVAQGFGLSGLMTSVLMTDPDGK.T<br>K.FADDLEK.V<br>R.LAAEADFGQLPSLQPGSIVATAPLPLR.A<br>R.PPSQADIDRETNIEIAFLK.E<br>R.ISELVAEER.G<br>K.ATAASVGAHHR.W<br>R.VLITPTISAGNGAVLAALK.A<br>R.IGLTGYELNDATPNAVLER.H<br>R.DJAADVAVRVSADLAR.N<br>K.QAGNSDWLVYGS DIPR.D<br>K.ILTESFGALAPR.A<br>R.SADVTAASIVPLSDWK.A<br>R.IELNSGVTALVSNK.I<br>R.IADATNAHLFAGQLLGDSPIGTTASLGK.A<br>R.AVIVVGGDPATFAR.L<br>R.SVAADAPNLLWTGDYALVAGSGIPWQNEIDQLTNGR.Q<br>R.RIDTVENTR.R<br>R.GEQQAAMTAWPTGGGR.T |
| YP_617011 | Sala_1966 | peptidase M16-like protein                       | 46.22%            | 27                      | R.VVIFAAGVGAPYFTTDSGAALR.A<br>R.VLAGEGVSTVVGDGAV.<br>K.GTSDGVYVADPK.Q<br>K.LSGEALMGSPFGIDPETVASMAAEVK.E<br>R.DNHIPVVFNR.E<br>R.AQADYMGMLATVMNALAMQNALEQLGVQTR.V<br>K.LSGEALMGSPFGIDPETVASMAAEVK.E<br>R.AQADYMGMLATVMNALAMQNALEQLGVQTR.V<br>K.GTSDGVYVADPKQDANVR.Y<br>R.FQLGEGIEEESDFAAEVAAGV.<br>K.TPVAEVAAAGK.D<br>K.AAQSGKPAEIVAK.M<br>R.VAAEGLVGFATDGT.R.G<br>K.IGVLVALESSAGADVLEPLGK.Q<br>K.ALAENNGDIEASIDWLR.T<br>R.GALVEVNSETFVGNQFQAFVR.D<br>K.ENALLSOLFVMDGKTPVAEVAAAGK.D<br>K.QLAMHVAANPLANGDDLDADLVAR.E<br>K.DVGAATLK.G<br>K.ENALLSOLFVMDGK.T<br>R.VALLTVNSGAVTGYVHNAAPGMGK.I<br>R.GALVEVNSETFVGNK.N<br>K.NEQFQAFVR.D<br>K.KALAEENGDIEASIDWLR.T<br>K.TPVAEVAAAGKDVGAATLK.G<br>R.RVALLTVNSGAVTGYVHNAAPGMGK.I<br>R.KENALLSOLFVMDGK.T<br>K.EESDFAAEVAAGV.<br>R.VALLTVNSGAVTGYVHNAAPGMGK.I<br>K.QLAMHVAANPLANGDDLDADLVAR.E<br>K.ENALLSOLFVMDGK.T<br>R.TKGLAAAK.K<br>R.TGAGMDCCK.A<br>R.KENALLSOLFVMDGKTPVAEVAAAGK.D<br>K.ENALLSOLFVMDGKTPVAEVAAAGK.D<br>R.ALDFIATAASGGK.V<br>R.NGIIHILDLSQTVPLFAR.A<br>K.TLEEQSGDTSGLTKK.E<br>K.EANVLGIPVVAALDSNVSPDGIAPFPVANDDAAR.A<br>R.ASQGHVNR.W<br>K.TLEEQSGDTSGLTK.K<br>R.QAQGPIADAAR.A<br>R.WLGGMLTNWK.T<br>R.LKTLLEEQSGDTSGLTK.K<br>R.RDGEDLGAAPVPAEPALEAAAPVTEDEQVPAEAAETER.Q<br>R.DMGGIPDVMFVIDANKEELAIAK.E<br>K.RAQGPIADAAR.A<br>R.DKLEMSLGGIR.D<br>K.VLFPVTK.R<br>K.LEMSLGGIR.D<br>R.WLGGMLTNWK.T<br>R.LYCDAVAQAATR.G<br>R.LKTLLEEQSGDTSGLTKK.E<br>R.ERDKLEMSLGGIR.D<br>K.TISNSIKR.L<br>R.MKPPIFGAR.N<br>R.DMGGIPDVMFVIDANKEELAIAK.E<br>R.DKLEMSLGGIR.D<br>K.KEVLNK.T<br>K.EVLNK.T<br>R.IGFTQIAGLVAR.R<br>K.FVNADLDKASEENER.Q<br>R.VIFMSVDFVHNR.T<br>R.RIMPFVMSGSELATQR.V<br>K.TVESEAHTVT.R.H<br>K.ATSTNPISAFVATGGLK.H<br>R.FKDFEIVFAEFK.V<br>R.GKLDNAALVK.F<br>R.ASLNYGLAR.E<br>R.NILGGVWFREPVMK.N<br>K.VANPVVLDGDEMTR.I<br>K.VQFDALGIVEHR.L<br>R.HAFGDQYK.A<br>R.IIWQWIR.E<br>K.ATDFRVPQCK.L<br>R.TDDKITVEANAIAK.K<br>R.LVPGWTDPIVGR.H<br>R.LIDDMVASALK.W<br>R.NILGGVWFR.E<br>R.EWPVYLSK.N<br>K.NYDGDVQSDTVAQGFGLSGLMTSVLMTDPDGK.T<br>K.DIFEVFNK.V<br>R.LIILPDLIDLHYDLGIEER.D<br>R.LVFEGEDGTLIDEEVFQFPSSGVAMGNLDDSI.R.D<br>K.LDDNAALVK.F<br>R.LVFEGEDGTLIDEEVFQFPSSGVAMGNLDDSI.RDFAR.A<br>R.ERLIPYLDIDLHYDLGIEER.D<br>K.DALLIGDQNWLTGFFAIVENLDKK.M<br>R.VEEFLK.M<br>R.TDDKITVEANAIAK.K<br>R.NILGGVWFREPVMK.N<br>R.LIDDMVASALK.W<br>K.VANPVVLDGDEMTR.I<br>K.KYGVGVK.C<br>K.FADDLEKVCVAVESGK.M<br>R.DRTDDKITVEANAIAK.K<br>K.VCVAVESGK.M<br>K.NYDGDVQSDTVAQGFGLSGLMTSVLMTDPDGK.T<br>K.NYDGDVQSDTVAQGFGLSGLMTSVLMTDPDGK.T<br>K.FADDLEK.V<br>R.LAAEADFGQLPSLQPGSIVATAPLPLR.A<br>R.PPSQADIDRETNIEIAFLK.E<br>R.ISELVAEER.G<br>K.ATAASVGAHHR.W<br>R.VLITPTISAGNGAVLAALK.A<br>R.IGLTGYELNDATPNAVLER.H<br>R.DJAADVAVRVSADLAR.N<br>K.QAGNSDWLVYGS DIPR.D<br>K.ILTESFGALAPR.A<br>R.SADVTAASIVPLSDWK.A<br>R.IELNSGVTALVSNK.I<br>R.IADATNAHLFAGQLLGDSPIGTTASLGK.A<br>R.AVIVVGGDPATFAR.L<br>R.SVAADAPNLLWTGDYALVAGSGIPWQNEIDQLTNGR.Q<br>R.RIDTVENTR.R<br>R.GEQQAAMTAWPTGGGR.T |



| Accession | Locus tag | Description                                                      | Sequence coverage | No. peptides identified | List of peptides identified                                                                                                                                                                                                                                                                                                                                                                                                                                                                                                                                                                                                                                                                                                                                                                                                                                                                                                                                                                                                                                                                                                                                                                                                                                                                                                                                                                                                                                                                                                                                                                                                                                                                                                                                                                                                                                                                                                                                                                                                                                                                                                                                                                                                                                                                                                                                                                                                                                                                                                                                                                                                                                                                                                                                                                                                                                                                                                                                                                                                                                                                                                                                                                                                                                                                                                                                                   |
|-----------|-----------|------------------------------------------------------------------|-------------------|-------------------------|-------------------------------------------------------------------------------------------------------------------------------------------------------------------------------------------------------------------------------------------------------------------------------------------------------------------------------------------------------------------------------------------------------------------------------------------------------------------------------------------------------------------------------------------------------------------------------------------------------------------------------------------------------------------------------------------------------------------------------------------------------------------------------------------------------------------------------------------------------------------------------------------------------------------------------------------------------------------------------------------------------------------------------------------------------------------------------------------------------------------------------------------------------------------------------------------------------------------------------------------------------------------------------------------------------------------------------------------------------------------------------------------------------------------------------------------------------------------------------------------------------------------------------------------------------------------------------------------------------------------------------------------------------------------------------------------------------------------------------------------------------------------------------------------------------------------------------------------------------------------------------------------------------------------------------------------------------------------------------------------------------------------------------------------------------------------------------------------------------------------------------------------------------------------------------------------------------------------------------------------------------------------------------------------------------------------------------------------------------------------------------------------------------------------------------------------------------------------------------------------------------------------------------------------------------------------------------------------------------------------------------------------------------------------------------------------------------------------------------------------------------------------------------------------------------------------------------------------------------------------------------------------------------------------------------------------------------------------------------------------------------------------------------------------------------------------------------------------------------------------------------------------------------------------------------------------------------------------------------------------------------------------------------------------------------------------------------------------------------------------------------|
|           |           |                                                                  |                   |                         | R.ASTGNVYWMFLLEGATR.D<br>R.ASATPQVMLDISR.A<br>R.ALEVLAAFNDR.L<br>R.AGASVLTATVEEQVYSR.S<br>R.AEQGASYPVVDHWPFTGDTGGYLLVGSLLAPK.D<br>R.VTAAALSQDDLAAVTADVQR.L<br>R.VDFAPHVTPEIAHYR.G<br>R.SPIGTTASLGK.A<br>R.PADLADQLR.L<br>R.IADATIAHLFAGQLLQDR.S<br>R.DTAWQFGILPNGLR.Y<br>R.TTYGHSVLPDWPWAILADAAR.S<br>R.SHVIAADGR.I<br>R.ALLGGTLLSDILAAR.D<br>R.IALESVLPFAR.W<br>R.HGAGIDPADGAAR.V<br>R.GEVSVIFPTR.R<br>R.ETLEETGLAVGWPGLAETEVAEVR.R<br>R.RHGAGIDPADGAAR.V<br>R.LESVQNANDQANVVAR.G<br>R.ATAEQIADTGTPLK.A<br>K.LQTAGLSTGHIDQVLR.G<br>K.FAGSIAIIDEPLPYERPRLSK.E<br>R.GIVGDEAPYHAIPWFWSNQDLK.L<br>R.AVTMLLQQR.V<br>K.LVWATGGSRR.M<br>R.VMAVDPAHVSVTDDGQTVGYGK.L<br>K.VVLEALDR.V<br>R.LAVGAVIPADLVIGIGVPAVEPLIAAGAECCNGVLVDR.L<br>K.EYFAGDKDFER.I<br>K.KVLEALDR.V<br>R.VAGEELSR.F<br>R.VIAIDCVNATK.D<br>R.TSLPDIYAGDCAAHANDFAGGAVIR.L<br>R.TRADADAMK.A<br>R.SFSVYVK.A<br>R.MLPIPGDLPVQVGR.T<br>R.SPAFVADEMAEEVIAGAKR.R<br>R.AGGDPSPTAQVDFDAMTAAEFALGK.S<br>R.AVEELGGVYTAEDVGTSVADMQEVATQTSR.H<br>R.GIVYAPDYVVAAGIIVSAYELGEDVRDVELR.V<br>R.LWSYDPDASHALADAVR.L<br>K.NALAGLPGGAK.A<br>R.SPAFVADEMAEEVIAGAKR.V<br>R.HVAGLPSAAGR.A<br>R.RPEGEWDR.V<br>R.LYDLEAGLDGFIHSTALGPGAGGCR.L<br>R.LVIADVSPVR.R<br>R.ANLDDEFSAAIR.G<br>R.DANQTTAEIAER.V<br>K.LPGIQTAEINSTVASEIK.S<br>R.DQILLAAHVADMAAAEAR.A<br>R.NHVDVVAEEDSGAIGR.G<br>K.IIAEADKYFAAK.W<br>R.VNPEVAWVAEQNR.V<br>R.VKDVATQDLPDEVR.W<br>R.LTFNPADFSVEQR.F<br>R.NDGLQPSVLYVR.E<br>R.FDTETGNSSEIFAQR.L<br>K.SSDPETVAFSSSFR.P<br>R.NLLSYSPYHNR.S<br>R.GDVTDPQFQVVDVADPYR.W<br>R.YWVDDYGYPSK.E<br>R.PGAKPIVLDVYANNWEYVNTAGTR.F<br>K.GGVLAIANL.R<br>R.MWALNGEPIANINLADIGAASFGGK.S<br>R.LGTQSDVLIHATPKPK.L<br>R.IILSYLGDAAK.S<br>R.DGATALAEWEPSEDKG.Y<br>K.LTELVAENPATLVGASR.V<br>K.LWNSALVTDGQYLLVSSSEGTDER.Y<br>R.VLIDPMLWAR.D<br>R.SGVAVPAVLVTTATDDRVVPGHSFK.Y<br>K.QNVDFDFAAGEYLIAEGITGK.G<br>K.EGEAFQSLNENHAYVFR.L<br>R.VTDAYLDTLPGR.D<br>R.DGATALAEWEPSEDKGKYLIVAQDGGTDWR.I<br>R.YGLTLHPLGR.P<br>R.LAWVDKGGVLIANL.R<br>K.YLLYAVQDGGTDWR.I<br>K.GSPTLLYGGFNLSLTPGFSPTL.L<br>K.DVATQDLPDEVR.W<br>K.DGSGFYYSR.F<br>R.LANKQWDFDFAAGEYLIAEGITGK.G<br>K.YTAAALQHAQ.A<br>R.MTELYDER.F<br>K.SKDGTEVPMFLVMK.K<br>R.AGHGSGKPTDK.I<br>R.WLEDDVAVNPEVAWVAEQNR.V<br>K.DGTEVPMFLVMK.K<br>R.SGVAVPAVLVTTATDDRVVPGHSFK.Y<br>K.PIVLDVYANNWEYVNTAGTR.F<br>R.YWVDDYGYPSKADFR.N<br>R.WLEDDVR.V<br>R.MTELYDER.F<br>R.EGKGEGR.V<br>K.SSDPETVAFSSSFR.P<br>K.LNNSALVTDGQYLLVSSSEGTDERYGLTLHPLGR.P<br>K.GQLAIEGGSNGLLVAVTNQRDFAAALPAVGMMDMLR.F<br>R.LVGLDLDLPLPAR.F<br>R.FTAADQAGAEALVAR.I<br>R.FDQQLVLPQKQK.A<br>R.SELVVPVIANDRVLVLDLPLPAR.F<br>R.SELVVPVIANDR.L<br>R.WTGTWGTYETPDGR.R<br>R.GGTGGAVVGGVGGIAGNR.I<br>R.TYEDVPVR.K<br>R.VDYLEIQSAGDSPR.W<br>K.RRFQTIIFGFAAR.G<br>R.QLFSIQDGHPIYAPGK.R<br>R.LAEIGWTLGESDGGFGR.Y<br>R.GGTLPAYGAVTVPVGTVDGWWTMHQR.Y<br>R.TAVYGLSAGVTAHPLATQAGIDMLR.R<br>R.GIEEIDNALR.T<br>R.VPVEWLSK.D<br>R.GTDVVALGANTQGIATLQMLNILEHFDLX.G<br>R.DAFYEIEAR.T<br>R.YEDLAHR.S<br>R.VYAAASEMR.A<br>R.LRAIEGWTGESDGGFGR.Y<br>K.IEFEPYIAHEVGPVPMIAYMYR.R<br>R.YYADPHFAR.V<br>R.GMGSGLVADGLGFMQDR.G<br>R.WHHEGSETMGEDAAGLGNLRL.L<br>R.GLDLATVR.S<br>R.VYAAASEMR.A<br>R.PFQTIIFGFAAR.G<br>R.LESGVPOASR.R<br>K.KLAGLAGSGK.S<br>K.HLVDGDESADTK.E<br>K.TLTMGGPIDTR.K<br>K.APTAVNEHATTRPYAWFQENVIATVPAYYPGAGR.C<br>K.HLVDGDESADTK.T<br>R.VTEAIEAR.R<br>R.LLIVAPMSGHYATLLR.G<br>R.GKPGFELYTTVDGETVR.V<br>R.GELVDIAAIEDIALIEGERDDISGIGQTK.A |
| YP_617012 | Sala_1967 | Nitrilase/cyanide hydratase and apolipoprotein N-acyltransferase | 10.49%            | 2                       |                                                                                                                                                                                                                                                                                                                                                                                                                                                                                                                                                                                                                                                                                                                                                                                                                                                                                                                                                                                                                                                                                                                                                                                                                                                                                                                                                                                                                                                                                                                                                                                                                                                                                                                                                                                                                                                                                                                                                                                                                                                                                                                                                                                                                                                                                                                                                                                                                                                                                                                                                                                                                                                                                                                                                                                                                                                                                                                                                                                                                                                                                                                                                                                                                                                                                                                                                                               |
| YP_617014 | Sala_1969 | NUDIX hydrolase                                                  | 27.27%            | 6                       |                                                                                                                                                                                                                                                                                                                                                                                                                                                                                                                                                                                                                                                                                                                                                                                                                                                                                                                                                                                                                                                                                                                                                                                                                                                                                                                                                                                                                                                                                                                                                                                                                                                                                                                                                                                                                                                                                                                                                                                                                                                                                                                                                                                                                                                                                                                                                                                                                                                                                                                                                                                                                                                                                                                                                                                                                                                                                                                                                                                                                                                                                                                                                                                                                                                                                                                                                                               |
| YP_617016 | Sala_1971 | FAD-dependent pyridine nucleotide-disulphide oxidoreductase      | 67.08%            | 18                      |                                                                                                                                                                                                                                                                                                                                                                                                                                                                                                                                                                                                                                                                                                                                                                                                                                                                                                                                                                                                                                                                                                                                                                                                                                                                                                                                                                                                                                                                                                                                                                                                                                                                                                                                                                                                                                                                                                                                                                                                                                                                                                                                                                                                                                                                                                                                                                                                                                                                                                                                                                                                                                                                                                                                                                                                                                                                                                                                                                                                                                                                                                                                                                                                                                                                                                                                                                               |
| YP_617018 | Sala_1973 | Glu/Leu/Phe/Val dehydrogenase, dimerisation region               | 55.14%            | 11                      |                                                                                                                                                                                                                                                                                                                                                                                                                                                                                                                                                                                                                                                                                                                                                                                                                                                                                                                                                                                                                                                                                                                                                                                                                                                                                                                                                                                                                                                                                                                                                                                                                                                                                                                                                                                                                                                                                                                                                                                                                                                                                                                                                                                                                                                                                                                                                                                                                                                                                                                                                                                                                                                                                                                                                                                                                                                                                                                                                                                                                                                                                                                                                                                                                                                                                                                                                                               |
| YP_617019 | Sala_1974 | transcriptional regulator, AsnC family                           | 25.64%            | 3                       |                                                                                                                                                                                                                                                                                                                                                                                                                                                                                                                                                                                                                                                                                                                                                                                                                                                                                                                                                                                                                                                                                                                                                                                                                                                                                                                                                                                                                                                                                                                                                                                                                                                                                                                                                                                                                                                                                                                                                                                                                                                                                                                                                                                                                                                                                                                                                                                                                                                                                                                                                                                                                                                                                                                                                                                                                                                                                                                                                                                                                                                                                                                                                                                                                                                                                                                                                                               |
| YP_617020 | Sala_1976 | mandelate racemase/muconate lactonizing enzyme                   | 11.25%            | 2                       |                                                                                                                                                                                                                                                                                                                                                                                                                                                                                                                                                                                                                                                                                                                                                                                                                                                                                                                                                                                                                                                                                                                                                                                                                                                                                                                                                                                                                                                                                                                                                                                                                                                                                                                                                                                                                                                                                                                                                                                                                                                                                                                                                                                                                                                                                                                                                                                                                                                                                                                                                                                                                                                                                                                                                                                                                                                                                                                                                                                                                                                                                                                                                                                                                                                                                                                                                                               |
| YP_617022 | Sala_1978 | Prolyl oligopeptidase                                            | 76.63%            | 46                      |                                                                                                                                                                                                                                                                                                                                                                                                                                                                                                                                                                                                                                                                                                                                                                                                                                                                                                                                                                                                                                                                                                                                                                                                                                                                                                                                                                                                                                                                                                                                                                                                                                                                                                                                                                                                                                                                                                                                                                                                                                                                                                                                                                                                                                                                                                                                                                                                                                                                                                                                                                                                                                                                                                                                                                                                                                                                                                                                                                                                                                                                                                                                                                                                                                                                                                                                                                               |
| YP_617023 | Sala_1979 | putative GAF sensor protein                                      | 34.16%            | 5                       |                                                                                                                                                                                                                                                                                                                                                                                                                                                                                                                                                                                                                                                                                                                                                                                                                                                                                                                                                                                                                                                                                                                                                                                                                                                                                                                                                                                                                                                                                                                                                                                                                                                                                                                                                                                                                                                                                                                                                                                                                                                                                                                                                                                                                                                                                                                                                                                                                                                                                                                                                                                                                                                                                                                                                                                                                                                                                                                                                                                                                                                                                                                                                                                                                                                                                                                                                                               |
| YP_617024 | Sala_1980 | 17 kDa surface antigen                                           | 16.73%            | 3                       |                                                                                                                                                                                                                                                                                                                                                                                                                                                                                                                                                                                                                                                                                                                                                                                                                                                                                                                                                                                                                                                                                                                                                                                                                                                                                                                                                                                                                                                                                                                                                                                                                                                                                                                                                                                                                                                                                                                                                                                                                                                                                                                                                                                                                                                                                                                                                                                                                                                                                                                                                                                                                                                                                                                                                                                                                                                                                                                                                                                                                                                                                                                                                                                                                                                                                                                                                                               |
| YP_617026 | Sala_1982 | Gamma-glutamyltransferase                                        | 52.39%            | 22                      |                                                                                                                                                                                                                                                                                                                                                                                                                                                                                                                                                                                                                                                                                                                                                                                                                                                                                                                                                                                                                                                                                                                                                                                                                                                                                                                                                                                                                                                                                                                                                                                                                                                                                                                                                                                                                                                                                                                                                                                                                                                                                                                                                                                                                                                                                                                                                                                                                                                                                                                                                                                                                                                                                                                                                                                                                                                                                                                                                                                                                                                                                                                                                                                                                                                                                                                                                                               |
| YP_617028 | Sala_1984 | polyhydroxyalkanoate depolymerase, intracellular                 | 40.39%            | 11                      |                                                                                                                                                                                                                                                                                                                                                                                                                                                                                                                                                                                                                                                                                                                                                                                                                                                                                                                                                                                                                                                                                                                                                                                                                                                                                                                                                                                                                                                                                                                                                                                                                                                                                                                                                                                                                                                                                                                                                                                                                                                                                                                                                                                                                                                                                                                                                                                                                                                                                                                                                                                                                                                                                                                                                                                                                                                                                                                                                                                                                                                                                                                                                                                                                                                                                                                                                                               |

| Accession | Locus tag | Description                                                | Sequence coverage | No. peptides identified | List of peptides identified                                                                                                                                                                                                                                                                                                                                                                                                                                                                                                                                                                                                                                                                                                                                                                                                                                                                                                                                                                                                                                                                                                                                                                                                                                                                                                                                                                                                                                                                                                                                                                                                                                                                                                                                                                                                                                                                                                                                                                                                                                                                                                                                                                                                                                                                                                                                                                                                                                                                                                                                                                                                                                                                                                                                                                                                                                                                                                                                                                                                                                                                                                                                                                                                                                                                                                                                                                                                                                            |
|-----------|-----------|------------------------------------------------------------|-------------------|-------------------------|------------------------------------------------------------------------------------------------------------------------------------------------------------------------------------------------------------------------------------------------------------------------------------------------------------------------------------------------------------------------------------------------------------------------------------------------------------------------------------------------------------------------------------------------------------------------------------------------------------------------------------------------------------------------------------------------------------------------------------------------------------------------------------------------------------------------------------------------------------------------------------------------------------------------------------------------------------------------------------------------------------------------------------------------------------------------------------------------------------------------------------------------------------------------------------------------------------------------------------------------------------------------------------------------------------------------------------------------------------------------------------------------------------------------------------------------------------------------------------------------------------------------------------------------------------------------------------------------------------------------------------------------------------------------------------------------------------------------------------------------------------------------------------------------------------------------------------------------------------------------------------------------------------------------------------------------------------------------------------------------------------------------------------------------------------------------------------------------------------------------------------------------------------------------------------------------------------------------------------------------------------------------------------------------------------------------------------------------------------------------------------------------------------------------------------------------------------------------------------------------------------------------------------------------------------------------------------------------------------------------------------------------------------------------------------------------------------------------------------------------------------------------------------------------------------------------------------------------------------------------------------------------------------------------------------------------------------------------------------------------------------------------------------------------------------------------------------------------------------------------------------------------------------------------------------------------------------------------------------------------------------------------------------------------------------------------------------------------------------------------------------------------------------------------------------------------------------------------|
| YP_617029 | Sala_1985 | ABC transporter related                                    | 19.43%            | 7                       | R.DDISGIGQTKAALTAR.A<br>K.WREEIAPVVEQWIR.A<br>K.APTAVNEHATR.P<br>R.FYDPQAGQLLDGVLVDADPADIR.A<br>R.LAPGFEEENRPEIASR.M<br>R.YGNWAASDEDLWAAAR.A<br>R.AANAEFLR.K<br>R.MTADTAIEQVVGTTVSVALR.N<br>R.APILLLDEATSDAASEK.L<br>K.STFLQEAER.I<br>R.AWGADNGVGEQQLLAAR.L<br>K.ADYVGYMMAYLRPGTAPT.G<br>R.LAPDMFPLAAQIR.F<br>R.LGAAGAPGFAEDGADFAALQAQIADALAWLGGIDR.S<br>R.GISDGSISAQAFGETRPAVATADGVR.N<br>R.FFNADNVLDVDAQGR.D<br>R.APLSSNWDVGLK.Y<br>R.VSVEPVFAGPFLDSDTGFQAWQAIAGVR.A<br>R.AGYDFEFTGYDFGGFR.A<br>R.YNVGLSER.R<br>R.RVEITYGPNNGM.<br>R.FFNADNVLDVDAQGRDVSTR.F<br>R.AEVEVGR.E<br>R.GISDGSISAQAFGETR.P<br>R.RNDAVR.S<br>R.AEVEVGFREADIK.S<br>R.PAVATADGVR.N<br>R.APLSSNWDVGLK.YR.F<br>R.YWVGLSERR.N<br>R.VEITYGPNNGM.<br>R.RVEITYGPNNGM.<br>R.GCTGTQIMLAGHADR.S<br>R.GCTGTQIMLAGHADR.S<br>R.SIATVQVGTSGYRK.L<br>R.QGAVVWNSDTLAKR.K<br>K.QAFGYSWPNFPTLLAER.V<br>R.AVAFFDQNLHSAK.Q<br>K.VASAFPVSPTYR.V<br>R.DQDLTEVADEIR.L<br>R.LPDTGHEFLDGEK.G<br>K.YPDQWALLSVLSADER.R<br>K.SEPNVASAGPAVALAK.N<br>R.ENALALTAVMDGLGR.I<br>K.YPDQWALLSVLSADERR.D<br>K.NTTADLIGDIEK.L<br>R.ETPLAQDQGPAPSPR.W<br>R.TVSESEQYITALLR.L<br>R.QAEWTDPLEIEIHALDVASGAIATLDR.N<br>R.LGSAPANKPEGAK.W<br>R.AVSSIWLDITATGR.E<br>R.SLVVQYDDHGETK.V<br>R.LTGLTPSSSLTWAPDGR.S<br>R.FTGADLFDLAAADPQISPDGR.H<br>R.NGPDANPLVSPDGR.L<br>R.GSTSYGEAFAQQIDK.A<br>K.VPGASHGGIAAR.P<br>R.IAANWYSDAVQWGDASR.S<br>R.ADGGQYVEPFGEK.I<br>R.SPLSVGNVETFLVVGEDYR.T<br>R.NFTGADLFDLAAADPQISPDGR.H<br>R.QLTFGPYHDGGPLSWR.D<br>R.LIAYLGFDDALR.A<br>R.AYEQTELVVMMNR.D<br>K.IFLIPATGGAPR.Q<br>K.AAALWFDKYR.K<br>R.WFALGYLDTLNDPDR.L<br>R.LIIDDVDSGR.S<br>R.HKPEAAIILGEVEAPGA.<br>R.LGMQVIDSQFKPHTLVGIWR.G<br>K.IFISANELLADSLR.L<br>R.LGMQVIDSQFKPHTLVGIWR.G<br>R.CIDDQDAR.V<br>R.GGAPVGIQVQELLDYHGQPCDHIAIR.T<br>R.VAIPFASIDVR.A<br>K.TVAHAGEEGPEVVR.E<br>K.ATVNSDDPSYGGVYVNAVQAVADLSDRLDLTLAR.N<br>R.GVAETVITGITR.A<br>R.NFTGFSLSDAEK.A<br>R.SLEDPALVAR.L<br>R.HLSEAEAEATLDEALPFLGR.I<br>R.AALEQTPPELSDIIDEGITLGGGALLR.R<br>R.DLVTRGPAEVQTEAEIAEAEPVQIVSAVR.A<br>R.DAASNAGAASVQLIEESLAAIAGLQVAEPR.G<br>R.GIVLNPSVVALTR.D<br>R.PAEVQVTEAEIAEAEPVQIVSAVR.A<br>R.YGVRPAANGK.A<br>R.VVSSPGFADPWYGGYGFYR.P<br>R.FQSQLPAPQGSFVVEASNPALGGIEFGQYANIVAGELTR.Y<br>R.DNDLQTLVPLNVEAMFTGPPGNSGER.V<br>R.VVSSPGFADPWYGGYGFYRPIVVR.G<br>R.MDYGVDKGR.E<br>R.MDYGVDKGR.E<br>K.FNLDTGTDFTLPEPTIPATAAR.I<br>K.NLVSYAAMADESDVQLAR.F<br>K.ANPAIDAALGAAR.A<br>R.TLSGQPTGNLHGLNVLGAI.R<br>K.LYFLADLHATVHNDPAELTANTR.E<br>R.INLVDDPDTIMAK.I<br>R.EGASVGLFAYPVLAQADVLLYQTHVPGDDQK.Q<br>K.TDPEPLSEAGLEGRPEAK.N<br>R.VPAHAELAWLFACTAR.I<br>K.AKTDFEPLSEAGLEGRPEAK.N<br>R.EMAAALMAAGIDPAK.A<br>R.EGASVGLFAYPVLAQADVLLYQTHVPGDDQKQHLELAR.D<br>K.AILFNQAR.V<br>R.NVPDDQLQPFLLAEAPR.I<br>K.TDKGTSVIELK.Y<br>K.YAGLFGVR.N<br>K.GTSVIELK.Y<br>R.SAPARILDDGETSAIVTSATDTAGLVYEPSAEAGLR.Q<br>R.QIGSNPNWLLDEAESA.<br>R.LDDGETSAIVTSATDTAGLVYEPSAEAGLR.Q<br>R.YHADISAITR.D<br>R.TGHEQEPVLP.R<br>K.RTGHEQEPVLP.R<br>K.LIAGSMSDAAQTDDLWTFR.R<br>R.MILEAFWK.G<br>R.QLLANDRNFDAGR.F<br>R.DLCCDDSYDAFVEAIDAR.E<br>K.ITAEALNR.G<br>R.RQIGSNPNWLLDEAESA.<br>R.NFDAGR.F<br>R.VGVAVQPITATPR.A<br>R.GAAMNENPSWVFFR.E<br>R.GSALLLPR.A<br>R.GQASMQGILDYLR.A<br>R.APLAIPAVPADATATASGVIAGPDFASLGISTEQAAAAAFAFR.I<br>R.AEPNGLWIAQDTGAIK.G<br>K.YVPLGAPVFLSLDR.A<br>R.FIDGIEPDGPVENLLAVR.R<br>K.HFGFAGHLVVPPGVGWTSDAFAPR.G<br>R.VTPDMIVVPEPTSVNR.L<br>K.LDEAVAIEDHR.L<br>K.ALLAVPSVTRATGAVFDVLEAALPLGTFVR.F<br>K.AEQEADKAAIAEK.E<br>K.AEQEADKAAIAEK.A<br>K.TVTLQGLAEGFSAVGPVAVDK.G |
| YP_617030 | Sala_1986 | hypothetical protein                                       | 47.19%            | 4                       |                                                                                                                                                                                                                                                                                                                                                                                                                                                                                                                                                                                                                                                                                                                                                                                                                                                                                                                                                                                                                                                                                                                                                                                                                                                                                                                                                                                                                                                                                                                                                                                                                                                                                                                                                                                                                                                                                                                                                                                                                                                                                                                                                                                                                                                                                                                                                                                                                                                                                                                                                                                                                                                                                                                                                                                                                                                                                                                                                                                                                                                                                                                                                                                                                                                                                                                                                                                                                                                                        |
| YP_617032 | Sala_1988 | OmpA/MotB                                                  | 42.90%            | 19                      |                                                                                                                                                                                                                                                                                                                                                                                                                                                                                                                                                                                                                                                                                                                                                                                                                                                                                                                                                                                                                                                                                                                                                                                                                                                                                                                                                                                                                                                                                                                                                                                                                                                                                                                                                                                                                                                                                                                                                                                                                                                                                                                                                                                                                                                                                                                                                                                                                                                                                                                                                                                                                                                                                                                                                                                                                                                                                                                                                                                                                                                                                                                                                                                                                                                                                                                                                                                                                                                                        |
| YP_617043 | Sala_1999 | phage major capsid protein, HK97                           | 8.16%             | 2                       |                                                                                                                                                                                                                                                                                                                                                                                                                                                                                                                                                                                                                                                                                                                                                                                                                                                                                                                                                                                                                                                                                                                                                                                                                                                                                                                                                                                                                                                                                                                                                                                                                                                                                                                                                                                                                                                                                                                                                                                                                                                                                                                                                                                                                                                                                                                                                                                                                                                                                                                                                                                                                                                                                                                                                                                                                                                                                                                                                                                                                                                                                                                                                                                                                                                                                                                                                                                                                                                                        |
| YP_617047 | Sala_2003 | hypothetical protein                                       | 33.80%            | 5                       |                                                                                                                                                                                                                                                                                                                                                                                                                                                                                                                                                                                                                                                                                                                                                                                                                                                                                                                                                                                                                                                                                                                                                                                                                                                                                                                                                                                                                                                                                                                                                                                                                                                                                                                                                                                                                                                                                                                                                                                                                                                                                                                                                                                                                                                                                                                                                                                                                                                                                                                                                                                                                                                                                                                                                                                                                                                                                                                                                                                                                                                                                                                                                                                                                                                                                                                                                                                                                                                                        |
| YP_617050 | Sala_2006 | proline iminopeptidase                                     | 16.76%            | 5                       |                                                                                                                                                                                                                                                                                                                                                                                                                                                                                                                                                                                                                                                                                                                                                                                                                                                                                                                                                                                                                                                                                                                                                                                                                                                                                                                                                                                                                                                                                                                                                                                                                                                                                                                                                                                                                                                                                                                                                                                                                                                                                                                                                                                                                                                                                                                                                                                                                                                                                                                                                                                                                                                                                                                                                                                                                                                                                                                                                                                                                                                                                                                                                                                                                                                                                                                                                                                                                                                                        |
| YP_617051 | Sala_2007 | peptidase S9, prolyl oligopeptidase active site region     | 41.67%            | 20                      |                                                                                                                                                                                                                                                                                                                                                                                                                                                                                                                                                                                                                                                                                                                                                                                                                                                                                                                                                                                                                                                                                                                                                                                                                                                                                                                                                                                                                                                                                                                                                                                                                                                                                                                                                                                                                                                                                                                                                                                                                                                                                                                                                                                                                                                                                                                                                                                                                                                                                                                                                                                                                                                                                                                                                                                                                                                                                                                                                                                                                                                                                                                                                                                                                                                                                                                                                                                                                                                                        |
| YP_617052 | Sala_2008 | phosphoribosyltransferase                                  | 59.16%            | 8                       |                                                                                                                                                                                                                                                                                                                                                                                                                                                                                                                                                                                                                                                                                                                                                                                                                                                                                                                                                                                                                                                                                                                                                                                                                                                                                                                                                                                                                                                                                                                                                                                                                                                                                                                                                                                                                                                                                                                                                                                                                                                                                                                                                                                                                                                                                                                                                                                                                                                                                                                                                                                                                                                                                                                                                                                                                                                                                                                                                                                                                                                                                                                                                                                                                                                                                                                                                                                                                                                                        |
| YP_617053 | Sala_2009 | adenosine deaminase                                        | 35.48%            | 7                       |                                                                                                                                                                                                                                                                                                                                                                                                                                                                                                                                                                                                                                                                                                                                                                                                                                                                                                                                                                                                                                                                                                                                                                                                                                                                                                                                                                                                                                                                                                                                                                                                                                                                                                                                                                                                                                                                                                                                                                                                                                                                                                                                                                                                                                                                                                                                                                                                                                                                                                                                                                                                                                                                                                                                                                                                                                                                                                                                                                                                                                                                                                                                                                                                                                                                                                                                                                                                                                                                        |
| YP_617054 | Sala_2010 | cell shape determining protein, MreB/Mrl family            | 31.50%            | 5                       |                                                                                                                                                                                                                                                                                                                                                                                                                                                                                                                                                                                                                                                                                                                                                                                                                                                                                                                                                                                                                                                                                                                                                                                                                                                                                                                                                                                                                                                                                                                                                                                                                                                                                                                                                                                                                                                                                                                                                                                                                                                                                                                                                                                                                                                                                                                                                                                                                                                                                                                                                                                                                                                                                                                                                                                                                                                                                                                                                                                                                                                                                                                                                                                                                                                                                                                                                                                                                                                                        |
| YP_617056 | Sala_2012 | hypothetical protein                                       | 49.78%            | 7                       |                                                                                                                                                                                                                                                                                                                                                                                                                                                                                                                                                                                                                                                                                                                                                                                                                                                                                                                                                                                                                                                                                                                                                                                                                                                                                                                                                                                                                                                                                                                                                                                                                                                                                                                                                                                                                                                                                                                                                                                                                                                                                                                                                                                                                                                                                                                                                                                                                                                                                                                                                                                                                                                                                                                                                                                                                                                                                                                                                                                                                                                                                                                                                                                                                                                                                                                                                                                                                                                                        |
| YP_617057 | Sala_2013 | tryptophanyl-tRNA synthetase                               | 65.66%            | 13                      |                                                                                                                                                                                                                                                                                                                                                                                                                                                                                                                                                                                                                                                                                                                                                                                                                                                                                                                                                                                                                                                                                                                                                                                                                                                                                                                                                                                                                                                                                                                                                                                                                                                                                                                                                                                                                                                                                                                                                                                                                                                                                                                                                                                                                                                                                                                                                                                                                                                                                                                                                                                                                                                                                                                                                                                                                                                                                                                                                                                                                                                                                                                                                                                                                                                                                                                                                                                                                                                                        |
| YP_617059 | Sala_2015 | protein-export protein SecB                                | 21.51%            | 4                       |                                                                                                                                                                                                                                                                                                                                                                                                                                                                                                                                                                                                                                                                                                                                                                                                                                                                                                                                                                                                                                                                                                                                                                                                                                                                                                                                                                                                                                                                                                                                                                                                                                                                                                                                                                                                                                                                                                                                                                                                                                                                                                                                                                                                                                                                                                                                                                                                                                                                                                                                                                                                                                                                                                                                                                                                                                                                                                                                                                                                                                                                                                                                                                                                                                                                                                                                                                                                                                                                        |
| YP_617060 | Sala_2016 | import inner membrane translocase, subunit Tim44           | 64.71%            | 13                      |                                                                                                                                                                                                                                                                                                                                                                                                                                                                                                                                                                                                                                                                                                                                                                                                                                                                                                                                                                                                                                                                                                                                                                                                                                                                                                                                                                                                                                                                                                                                                                                                                                                                                                                                                                                                                                                                                                                                                                                                                                                                                                                                                                                                                                                                                                                                                                                                                                                                                                                                                                                                                                                                                                                                                                                                                                                                                                                                                                                                                                                                                                                                                                                                                                                                                                                                                                                                                                                                        |
| YP_617061 | Sala_2017 | MitA                                                       | 28.41%            | 7                       |                                                                                                                                                                                                                                                                                                                                                                                                                                                                                                                                                                                                                                                                                                                                                                                                                                                                                                                                                                                                                                                                                                                                                                                                                                                                                                                                                                                                                                                                                                                                                                                                                                                                                                                                                                                                                                                                                                                                                                                                                                                                                                                                                                                                                                                                                                                                                                                                                                                                                                                                                                                                                                                                                                                                                                                                                                                                                                                                                                                                                                                                                                                                                                                                                                                                                                                                                                                                                                                                        |
| YP_617063 | Sala_2019 | succinyl-diaminopimelate desuccinylase                     | 27.85%            | 5                       |                                                                                                                                                                                                                                                                                                                                                                                                                                                                                                                                                                                                                                                                                                                                                                                                                                                                                                                                                                                                                                                                                                                                                                                                                                                                                                                                                                                                                                                                                                                                                                                                                                                                                                                                                                                                                                                                                                                                                                                                                                                                                                                                                                                                                                                                                                                                                                                                                                                                                                                                                                                                                                                                                                                                                                                                                                                                                                                                                                                                                                                                                                                                                                                                                                                                                                                                                                                                                                                                        |
| YP_617066 | Sala_2022 | protein of unknown function DUF853, NPT hydrolase putative | 29.08%            | 10                      |                                                                                                                                                                                                                                                                                                                                                                                                                                                                                                                                                                                                                                                                                                                                                                                                                                                                                                                                                                                                                                                                                                                                                                                                                                                                                                                                                                                                                                                                                                                                                                                                                                                                                                                                                                                                                                                                                                                                                                                                                                                                                                                                                                                                                                                                                                                                                                                                                                                                                                                                                                                                                                                                                                                                                                                                                                                                                                                                                                                                                                                                                                                                                                                                                                                                                                                                                                                                                                                                        |



| Accession | Locus tag | Description                                                  | Sequence coverage | No. peptides identified | List of peptides identified                                                                                                                                                                                                                                                                                                                                                                                                                                                                                                                                                                                                                                                                                                                                                                                                                                                                                                                                                                                                                                                                                                                                                                                                                                                                                                                                                                                                                                                                                                                                                                                                                                                                                                                                                                                                                                                                                                                                                                                                                                                                                                                                                                                                                                                                                                                                                                                                                                                                                                                                                                                                                                                                                                                                                                                                                                                                                                                                                                                                                                                                                                                                                                                                                                                                                                                                                                                                 |
|-----------|-----------|--------------------------------------------------------------|-------------------|-------------------------|-----------------------------------------------------------------------------------------------------------------------------------------------------------------------------------------------------------------------------------------------------------------------------------------------------------------------------------------------------------------------------------------------------------------------------------------------------------------------------------------------------------------------------------------------------------------------------------------------------------------------------------------------------------------------------------------------------------------------------------------------------------------------------------------------------------------------------------------------------------------------------------------------------------------------------------------------------------------------------------------------------------------------------------------------------------------------------------------------------------------------------------------------------------------------------------------------------------------------------------------------------------------------------------------------------------------------------------------------------------------------------------------------------------------------------------------------------------------------------------------------------------------------------------------------------------------------------------------------------------------------------------------------------------------------------------------------------------------------------------------------------------------------------------------------------------------------------------------------------------------------------------------------------------------------------------------------------------------------------------------------------------------------------------------------------------------------------------------------------------------------------------------------------------------------------------------------------------------------------------------------------------------------------------------------------------------------------------------------------------------------------------------------------------------------------------------------------------------------------------------------------------------------------------------------------------------------------------------------------------------------------------------------------------------------------------------------------------------------------------------------------------------------------------------------------------------------------------------------------------------------------------------------------------------------------------------------------------------------------------------------------------------------------------------------------------------------------------------------------------------------------------------------------------------------------------------------------------------------------------------------------------------------------------------------------------------------------------------------------------------------------------------------------------------------------|
| YP_617088 | Sala_2046 | Phosphoenolpyruvate carboxykinase (ATP)                      | 56.15%            | 20                      | R.FFVEENSNPLEVASEVDRYCSWAGQACGYK.V<br>K.VGHSEIVR.Q<br>R.LSPFAEPEIFATTR.R<br>R.TAOTLVQGFANFAQFESHVDEGVR.Q<br>K.SVFGLNLVLPK.G<br>R.GDTAVFFGLSGTGK.T<br>R.FGTVLENVMDPVTR.E<br>R.ALLNAALDGSNDAEFR.R<br>R.SETVIAVNFTEK.L<br>K.LLTPDQAMHYFLSGYTR.V<br>K.DGPLVYATGK.H<br>R.YFGFMVPAVPGVDAR.L<br>R.ELDFDDATLAENSR.G<br>R.ALLNAALDGSNDAEFR.R<br>R.ALLNAALDGSNDAEFR.R<br>K.VVIGGDTIETQAEVAENWGTAFLVEEAVR.H<br>R.DRYFGFMVPAVPGVDAR.L<br>R.TLLCRPTAEELAGFAAEYITVDLPSFR.A<br>R.QQLFGGSSQPEHR.V<br>R.GSYPIDIFPTSENMMGPVQNIIMLTADAYGLVLPPIAK.L<br>K.TNVPMPDHFALK.A<br>K.LLILGGTYAGEMK.K<br>K.ADFLAHMAAR.P<br>R.VYSDGEALPKLIDNPPDLAVDFDIK.M<br>R.APPSEDEPVAEPITR.G<br>R.EVDPGFDAIATLYGAYR.F<br>R.VVELDTPQTVLMTLNAR.D<br>R.AQLLAIADVDV.R<br>R.TVIEGHGTTISAR.D<br>R.LVSDISEASR.V<br>R.HSGLGLAIAR.T<br>R.GIDWIVGAPYDFREPVAIVAAWPEVIEAQR.S<br>R.GIGIVERPWTAPVPLAVR.L<br>R.MPAVQGVETVAGHPLPALLSAFEVSAPIK.I<br>R.FGEADDGEPVLNLSFGFAR.G<br>R.NPHWDPALKPTGLDPAVAVYIADPAYEETVSQIER.L<br>R.LLIVTGLSGAGK.S<br>R.WAEHVVDNTNYSNDLQVEVR.Q<br>R.NLDSAPQDGLGKPPSAAR.A<br>R.GEAERPLAVGIDSR.S<br>R.LLITLPR.Y<br>K.APLLEGMVTVHGR.L<br>R.TEVIAGVNLPLIR.L<br>R.RQEIAAIR.S<br>R.LPETVTEVEK.G<br>K.LVGLVKDSFGED.<br>R.YAAPTIFILVGNESQGLPADYAAAADV.R.V<br>K.LSGKDNPTQIVGIAEPAITLAIDR.N<br>K.ADSLNAVAAVAAVAVELNQR.R<br>R.TGDAVAGAGLLLDGSDTDPYGVAVR.A<br>R.SGQELVATWLGDDSDYQAVR.Y<br>R.WDAFLPWLR.S<br>R.NAAPLWVAER.L<br>R.WDAFLPWLRSGQELVATWLGDDSDYQAVR.Y<br>R.AEGLFLAEGLR.I<br>K.VLLATPTNLIAIR.T<br>R.QLQDAQAALTAQFR.E<br>K.VPGGQSLVIDAK.V<br>K.RFEALDIETGR.E<br>K.NLDQATGAYNAPVGSFESQVLTQAK.R<br>R.DVELVATDLAQR.V<br>K.LPMFVFTNNNER.I<br>R.AAVPANGELVFK.Q<br>K.HLMIWINGAAVR.A<br>R.AGKLPMAFVFTNNNER.I<br>K.LPMFVFTNNNER.I<br>K.AGGEDYSPQISAFIQK.M<br>K.SQVYSTADDNQSAVTIR.V<br>R.QAVTNPENTIFAVK.R<br>K.TAIEGGDAAAMTEK.A<br>K.EQQAAASPAADAGEAK.A<br>K.NNAESLVHITER.Q<br>K.DAECFAEDKK.R<br>K.VIENVEGTR.T<br>K.STNGDTFLGGEDFDSK.L<br>K.MKETAAYLGEK.V<br>K.LVEFLADTFK.D<br>K.LVFLADTFK.K<br>K.LVFLADTFK.K<br>K.LVFLADTFK.E<br>K.IQASGGLSDADIEQMVK.D<br>K.IELSSAATTEVNLFFITADANGPK.H<br>K.DVLLLDVTPLSLGIETLGGIMTK.M<br>K.ADEDVDAEFSEVEDDKK.<br>R.IINEPTAALAYLDKSENK.T<br>K.SIEIAIAETK.T<br>K.LGQATYEKEQAAASPAADAGEAK.A<br>K.DFFGKEPHTGVNPEVVAIGAIAQAGVLQGDVK.D<br>K.AGALAQAMK.L<br>K.KSQVYSTADDNQSAVTIR.V<br>K.IAGLEVLR.I<br>K.DMELVPYSIVK.G<br>K.AKIELSSAATTEVNLFFITADANGPK.H<br>R.QAVTNPENTIFAVK.R<br>K.EPHTGVNPEVVAIGAIAQAGVLQGDVK.D<br>K.DIDEVVLVGGMTR.M<br>R.ADLEKLVEDLVK.R<br>R.GVPQIEVTFDIDANGIVSVHAK.D<br>K.LVEDLVK.R<br>K.GPNGDWVK.A<br>R.NDKLALQR.L<br>K.VSALKSEIEAIAETK.T<br>K.STNGDTFLGGEDFDSKLVFLADTFK.K<br>K.AIKDAGVSAK.D<br>K.IQASGGLSDADIEQMVKDAEQFAEEDK.K<br>R.RFDDPMTK.D<br>R.QLAHEGDKVDSALKSEIEAIAETK.T<br>R.QLAHEGDKVDSALK.S<br>K.TAIEGGDAAAMTEK.A<br>K.MKETAAYLGEK.V<br>K.LVEFLADTFKDEGIDLR.N<br>K.LVEDLVK.R<br>K.KDMELVPYSIVK.G<br>K.KDEGIDLR.N<br>K.IQASGGLSDADIEQMVK.D<br>K.DVLLLDVTPLSLGIETLGGIMTK.M<br>K.DKSTGKEQQIK.I<br>K.DIDEVVLVGGMTR.M<br>K.DAGKIAGLEVLR.I<br>K.AGALAQAMK.L<br>R.EVVKDFGK.E<br>K.KDMELVPYSIVK.G<br>K.IQASGGLSDADIEQMVKDAEQFAEEDK.R<br>K.ETAAYLGEKVEQAVITVPAYFNDAQR.Q<br>K.ETAAYLGEK.V<br>K.DMELVPYSIVK.G<br>K.DAGVSAKDIDEVVLVGGMTR.M<br>R.LEDAFTGVTR.E<br>K.AGVNMGAGGFGGHSDFDIDGIFESIFGSAFGGAR.Q<br>R.KHEIAPAGIQSGK.Q<br>R.AQQGFFMVER.T<br>R.IVSGLLFLAHGVQK.F<br>K.FLDYGEQAFALLR.I<br>K.TYLAVAQVAQLITGSVQR.L<br>K.QVDLPVATSGLADAVAR.L<br>R.TQLGLGFEEDR.N<br>R.IASGEIEIAPLAFMR.G<br>R.DDVIFALGPAGTGK.T<br>R.LILSRPAVEAGEK.L |
| YP_617089 | Sala_2047 | two component transcriptional regulator, winged helix family | 25.00%            | 3                       |                                                                                                                                                                                                                                                                                                                                                                                                                                                                                                                                                                                                                                                                                                                                                                                                                                                                                                                                                                                                                                                                                                                                                                                                                                                                                                                                                                                                                                                                                                                                                                                                                                                                                                                                                                                                                                                                                                                                                                                                                                                                                                                                                                                                                                                                                                                                                                                                                                                                                                                                                                                                                                                                                                                                                                                                                                                                                                                                                                                                                                                                                                                                                                                                                                                                                                                                                                                                                             |
| YP_617090 | Sala_2048 | periplasmic sensor signal transduction histidine kinase      | 18.96%            | 6                       |                                                                                                                                                                                                                                                                                                                                                                                                                                                                                                                                                                                                                                                                                                                                                                                                                                                                                                                                                                                                                                                                                                                                                                                                                                                                                                                                                                                                                                                                                                                                                                                                                                                                                                                                                                                                                                                                                                                                                                                                                                                                                                                                                                                                                                                                                                                                                                                                                                                                                                                                                                                                                                                                                                                                                                                                                                                                                                                                                                                                                                                                                                                                                                                                                                                                                                                                                                                                                             |
| YP_617091 | Sala_2049 | HPr kinase                                                   | 33.78%            | 2                       |                                                                                                                                                                                                                                                                                                                                                                                                                                                                                                                                                                                                                                                                                                                                                                                                                                                                                                                                                                                                                                                                                                                                                                                                                                                                                                                                                                                                                                                                                                                                                                                                                                                                                                                                                                                                                                                                                                                                                                                                                                                                                                                                                                                                                                                                                                                                                                                                                                                                                                                                                                                                                                                                                                                                                                                                                                                                                                                                                                                                                                                                                                                                                                                                                                                                                                                                                                                                                             |
| YP_617092 | Sala_2050 | Uncharacterized P-loop ATPase protein UPF0042                | 41.46%            | 7                       |                                                                                                                                                                                                                                                                                                                                                                                                                                                                                                                                                                                                                                                                                                                                                                                                                                                                                                                                                                                                                                                                                                                                                                                                                                                                                                                                                                                                                                                                                                                                                                                                                                                                                                                                                                                                                                                                                                                                                                                                                                                                                                                                                                                                                                                                                                                                                                                                                                                                                                                                                                                                                                                                                                                                                                                                                                                                                                                                                                                                                                                                                                                                                                                                                                                                                                                                                                                                                             |
| YP_617093 | Sala_2051 | PTS system fructose subfamily IIA component                  | 26.06%            | 3                       |                                                                                                                                                                                                                                                                                                                                                                                                                                                                                                                                                                                                                                                                                                                                                                                                                                                                                                                                                                                                                                                                                                                                                                                                                                                                                                                                                                                                                                                                                                                                                                                                                                                                                                                                                                                                                                                                                                                                                                                                                                                                                                                                                                                                                                                                                                                                                                                                                                                                                                                                                                                                                                                                                                                                                                                                                                                                                                                                                                                                                                                                                                                                                                                                                                                                                                                                                                                                                             |
| YP_617094 | Sala_2052 | HPrNtr                                                       | 25.00%            | 2                       |                                                                                                                                                                                                                                                                                                                                                                                                                                                                                                                                                                                                                                                                                                                                                                                                                                                                                                                                                                                                                                                                                                                                                                                                                                                                                                                                                                                                                                                                                                                                                                                                                                                                                                                                                                                                                                                                                                                                                                                                                                                                                                                                                                                                                                                                                                                                                                                                                                                                                                                                                                                                                                                                                                                                                                                                                                                                                                                                                                                                                                                                                                                                                                                                                                                                                                                                                                                                                             |
| YP_617095 | Sala_2053 | tRNA/rRNA methyltransferase (SpoU)                           | 56.67%            | 9                       |                                                                                                                                                                                                                                                                                                                                                                                                                                                                                                                                                                                                                                                                                                                                                                                                                                                                                                                                                                                                                                                                                                                                                                                                                                                                                                                                                                                                                                                                                                                                                                                                                                                                                                                                                                                                                                                                                                                                                                                                                                                                                                                                                                                                                                                                                                                                                                                                                                                                                                                                                                                                                                                                                                                                                                                                                                                                                                                                                                                                                                                                                                                                                                                                                                                                                                                                                                                                                             |
| YP_617097 | Sala_2055 | protein of unknown function DUF195                           | 17.07%            | 5                       |                                                                                                                                                                                                                                                                                                                                                                                                                                                                                                                                                                                                                                                                                                                                                                                                                                                                                                                                                                                                                                                                                                                                                                                                                                                                                                                                                                                                                                                                                                                                                                                                                                                                                                                                                                                                                                                                                                                                                                                                                                                                                                                                                                                                                                                                                                                                                                                                                                                                                                                                                                                                                                                                                                                                                                                                                                                                                                                                                                                                                                                                                                                                                                                                                                                                                                                                                                                                                             |
| YP_617099 | Sala_2057 | DUF461                                                       | 31.64%            | 6                       |                                                                                                                                                                                                                                                                                                                                                                                                                                                                                                                                                                                                                                                                                                                                                                                                                                                                                                                                                                                                                                                                                                                                                                                                                                                                                                                                                                                                                                                                                                                                                                                                                                                                                                                                                                                                                                                                                                                                                                                                                                                                                                                                                                                                                                                                                                                                                                                                                                                                                                                                                                                                                                                                                                                                                                                                                                                                                                                                                                                                                                                                                                                                                                                                                                                                                                                                                                                                                             |
| YP_617100 | Sala_2058 | Chaperone DnaK                                               | 81.70%            | 60                      |                                                                                                                                                                                                                                                                                                                                                                                                                                                                                                                                                                                                                                                                                                                                                                                                                                                                                                                                                                                                                                                                                                                                                                                                                                                                                                                                                                                                                                                                                                                                                                                                                                                                                                                                                                                                                                                                                                                                                                                                                                                                                                                                                                                                                                                                                                                                                                                                                                                                                                                                                                                                                                                                                                                                                                                                                                                                                                                                                                                                                                                                                                                                                                                                                                                                                                                                                                                                                             |
| YP_617101 | Sala_2059 | Chaperone DnaJ                                               | 18.88%            | 4                       |                                                                                                                                                                                                                                                                                                                                                                                                                                                                                                                                                                                                                                                                                                                                                                                                                                                                                                                                                                                                                                                                                                                                                                                                                                                                                                                                                                                                                                                                                                                                                                                                                                                                                                                                                                                                                                                                                                                                                                                                                                                                                                                                                                                                                                                                                                                                                                                                                                                                                                                                                                                                                                                                                                                                                                                                                                                                                                                                                                                                                                                                                                                                                                                                                                                                                                                                                                                                                             |
| YP_617104 | Sala_2062 | DoxX                                                         | 22.40%            | 2                       |                                                                                                                                                                                                                                                                                                                                                                                                                                                                                                                                                                                                                                                                                                                                                                                                                                                                                                                                                                                                                                                                                                                                                                                                                                                                                                                                                                                                                                                                                                                                                                                                                                                                                                                                                                                                                                                                                                                                                                                                                                                                                                                                                                                                                                                                                                                                                                                                                                                                                                                                                                                                                                                                                                                                                                                                                                                                                                                                                                                                                                                                                                                                                                                                                                                                                                                                                                                                                             |
| YP_617105 | Sala_2063 | PhoH-like protein                                            | 51.04%            | 12                      |                                                                                                                                                                                                                                                                                                                                                                                                                                                                                                                                                                                                                                                                                                                                                                                                                                                                                                                                                                                                                                                                                                                                                                                                                                                                                                                                                                                                                                                                                                                                                                                                                                                                                                                                                                                                                                                                                                                                                                                                                                                                                                                                                                                                                                                                                                                                                                                                                                                                                                                                                                                                                                                                                                                                                                                                                                                                                                                                                                                                                                                                                                                                                                                                                                                                                                                                                                                                                             |

| Accession | Locus tag | Description                            | Sequence coverage | No. peptides identified | List of peptides identified                                                                                                                                                                                                                                                                                                                                                                                                                                                                                                                                                                                                                                                                                                                                                                                                                                                                                                                                                                                                                                                                                                                                                                                                                                                                                                                                                                                                                                                                                                                                                                                                                                                                                                                                                                                                                                                                                                                                                                                                                                                                                                                                                                                                                                                                                                                                                                                                                                                                                                                                                                                                                                                                                                                                                                                                                                                                                                          |
|-----------|-----------|----------------------------------------|-------------------|-------------------------|--------------------------------------------------------------------------------------------------------------------------------------------------------------------------------------------------------------------------------------------------------------------------------------------------------------------------------------------------------------------------------------------------------------------------------------------------------------------------------------------------------------------------------------------------------------------------------------------------------------------------------------------------------------------------------------------------------------------------------------------------------------------------------------------------------------------------------------------------------------------------------------------------------------------------------------------------------------------------------------------------------------------------------------------------------------------------------------------------------------------------------------------------------------------------------------------------------------------------------------------------------------------------------------------------------------------------------------------------------------------------------------------------------------------------------------------------------------------------------------------------------------------------------------------------------------------------------------------------------------------------------------------------------------------------------------------------------------------------------------------------------------------------------------------------------------------------------------------------------------------------------------------------------------------------------------------------------------------------------------------------------------------------------------------------------------------------------------------------------------------------------------------------------------------------------------------------------------------------------------------------------------------------------------------------------------------------------------------------------------------------------------------------------------------------------------------------------------------------------------------------------------------------------------------------------------------------------------------------------------------------------------------------------------------------------------------------------------------------------------------------------------------------------------------------------------------------------------------------------------------------------------------------------------------------------------|
|           |           |                                        |                   |                         | K.RPLTAATPAEPGDR.V<br>R.APSQVPMQALR.D<br>R.LEGLEGINVSR.F<br>R.TQLLGLFGEFDRNLVAENR.L<br>R.TLADAFITLDEAQTITPQMK.M<br>R.VQEGEAEAAA.A<br>R.LQALLNEQQAFNEATVGR.T<br>R.GAEISRPFADLAEAR.A                                                                                                                                                                                                                                                                                                                                                                                                                                                                                                                                                                                                                                                                                                                                                                                                                                                                                                                                                                                                                                                                                                                                                                                                                                                                                                                                                                                                                                                                                                                                                                                                                                                                                                                                                                                                                                                                                                                                                                                                                                                                                                                                                                                                                                                                                                                                                                                                                                                                                                                                                                                                                                                                                                                                                   |
| YP_617106 | Sala_2064 | tRNA-(6)A37 modification enzyme MiaB   | 7.88%             | 2                       | R.LQALLNEQQAFNEATVGR.T<br>R.GAEISRPFADLAEAR.A                                                                                                                                                                                                                                                                                                                                                                                                                                                                                                                                                                                                                                                                                                                                                                                                                                                                                                                                                                                                                                                                                                                                                                                                                                                                                                                                                                                                                                                                                                                                                                                                                                                                                                                                                                                                                                                                                                                                                                                                                                                                                                                                                                                                                                                                                                                                                                                                                                                                                                                                                                                                                                                                                                                                                                                                                                                                                        |
| YP_617108 | Sala_2066 | ferric uptake regulator, Fur family    | 64.54%            | 7                       | K.IDSGISIAIVR.T<br>K.VIEFVDFEALQK.V<br>R.VISESDHPDVTLYDR.A<br>R.SRYEAAPEAHHDHLDIVETGK.V<br>R.MELYGVAIDR.K<br>R.LFEEAGILDR.HDFDGR.S<br>R.LFEEAGILDR.H                                                                                                                                                                                                                                                                                                                                                                                                                                                                                                                                                                                                                                                                                                                                                                                                                                                                                                                                                                                                                                                                                                                                                                                                                                                                                                                                                                                                                                                                                                                                                                                                                                                                                                                                                                                                                                                                                                                                                                                                                                                                                                                                                                                                                                                                                                                                                                                                                                                                                                                                                                                                                                                                                                                                                                                 |
| YP_617109 | Sala_2067 | transcriptional regulator, MucR family | 13.19%            | 2                       | K.WGLAADVPMVAPNVAEK.R<br>R.AKWGLAADVPMVAPNVAEK.R                                                                                                                                                                                                                                                                                                                                                                                                                                                                                                                                                                                                                                                                                                                                                                                                                                                                                                                                                                                                                                                                                                                                                                                                                                                                                                                                                                                                                                                                                                                                                                                                                                                                                                                                                                                                                                                                                                                                                                                                                                                                                                                                                                                                                                                                                                                                                                                                                                                                                                                                                                                                                                                                                                                                                                                                                                                                                     |
| YP_617111 | Sala_2069 | peptidase M22, glycoprotease           | 23.56%            | 3                       | R.LVPLIAELADGGR.A<br>R.GALTNPPSPYGR.A<br>R.ADACSLLPDAVALNDVLVGNR.A<br>R.SNFISTLGYDPAITFDR.S<br>K.DALAEITAFR.N<br>R.NSSLQCAVYLAAR.A<br>K.FGPTSANSLPAR.I<br>R.ALGLDTPMGSFNDVADKAFADQPK.V<br>R.ALGLDTPMGSFNDVADK.A<br>R.TYNGYLDKPVSEALHAIWDLMK.F<br>K.LAAHAMPANA.EK.I<br>R.SWFAKDALAEITAFR.N<br>R.IVWCMSDAK.E<br>R.ALGLDTPMGSFNDVADKAFADQPK.V<br>K.VKSNFISTLGYDPAITFDR.S<br>K.LAAHAMPANA.EK.I<br>K.AFFADQPK.V<br>R.TYNGYLDKPVSEALHAIWDLMK.F<br>R.ALGLDTPMGSFNDVADK.A<br>R.VRPAVANDGGDIVR.G<br>R.GFDKGNVYK.M<br>R.DFASAEAEASPLASALFSLGDTVGVFFGR.D<br>K.HYVPEVTAVHAW<br>.MLIESTPNPATL.K.F<br>R.PAVANDGGDIVR.G<br>K.NGIESLLK.H<br>R.AEDGTVTAPDVR.V<br>K.ESDILGVIEQAEALKK.A<br>K.QNKDAGDGTITATVLAQIVR.E<br>K.LENVTVNMLGRK.K<br>R.AAAVEEGLPGGGIALLR.A<br>R.TALQDAASVAALLITTEALVAELPK.EE.K<br>K.AANDDQSGDIVR.R<br>R.QQIDITTSYDREK.L<br>K.VGNEGIVTVEAK.S<br>R.TALQDAASVAALLITTEALVAELPK.E<br>R.QQIDITTSYDRE.E<br>R.QIADNAGEDGAWIVGK.L<br>R.GYLSPYFITNAEK.L<br>K.VVIDKDNTTIVDVGVAR.T<br>K.LLESSDYNWGFNAATGEYDLVK.A<br>K.LENVTVNMLGR.A<br>R.AIAEEQPHIY.L<br>R.SPYSYLAVGR.Y<br>R.VAQFHGIPGPRPDIVQDVR.T<br>R.ALAASHDVTINLRPVYPLAIR.Q<br>R.NHPNWLSTYMR.D<br>R.AFTIQVEVHSR.E<br>R.SPTPADLSITPR.D<br>R.VLATELITGR.I<br>R.THANLLHHFGSAAGLQK.A<br>R.SAALEAAR.Q<br>R.IDRTHANLLHHFGSAAGLQK.A<br>K.LLDLLEGAPASGFLVGD.R.L<br>R.LTLADLAVASPLNLR.H<br>R.DGDIAAAAAAEELPK.L<br>K.GVLGDPDPGFK.A<br>K.MPAIDDDGLADSSAIHYLEAK.H<br>K.IAAWSEILSR.P<br>.MIVYGSIVSPFR.K<br>K.MPAIDDDGLADSSAIHYLEAK.H<br>R.DGFTAAAHGLTPIVAEPPATDR.H<br>R.AGVSQSTVSR.A<br>R.SAINPFYFALLGSIAAATSAR.G<br>R.IAFVGPQQSPQR.Q<br>R.AGTLADPALTLEPDLAAGEALVAMALEDDERTR.S<br>R.RVPHDVALIGFDSGR.A<br>R.AGTLADPALTLEPDLAAGEALVAMALEDDER.T<br>K.SDGYVATNSVTATK.T<br>R.NNTAVPVAGVPGSQFLTDR.T<br>R.NGTLNGLDLANIVPTVSFGLVR.N<br>R.LGQVPEHQFALWNR.Y<br>K.TDPLFDVQPTISVTR.E<br>R.YFSDAHNLLNITPGAPINAR.F<br>R.SGDQFLTLAPASGSSPAQEDLTPER.M<br>R.QONTADFFLDGVRDDVQYFR.S<br>R.DTFFGVPVNR.T<br>R.QNFIAQSNLLWVDLGGIDNR.I<br>K.WDIRPDLNVAALFQLDR.N<br>R.IFLGLEYDQDSTNQR.R<br>R.ERLDDQASR.S<br>R.RQNFIAQSNLLWVDLGGIDNR.I<br>R.ENVSIVGSYSR.S<br>R.TGLEAHIVK.A<br>R.ITPNWQVSGGYTWQDAHR.K<br>R.IGLLKP.RE<br>R.VAFQVNVENLFDER.Y<br>R.NVGMGLGVHQSSQFAAIR.T<br>R.LNANYESLDNHRDFFEGER.Y<br>K.LGLSYEYVNDRVRTDR.G<br>R.YAINPYVAADLGR.W<br>K.GPFAMIFGR.G<br>R.YVPGTTIGQEGEGRDQITL.R.G<br>R.GVELALTGR.I<br>R.LNANYESLDNHR.D<br>K.SDGYVATNSVTATKTDPLIDVPQTISVTR.E<br>K.LGLSYEYVNDR.V<br>R.VDAALFVR.A<br>R.KNDDSR.L<br>R.IDGLEAEALTWSTLLYGDYK.Y<br>K.GTDLIGAPR.P<br>K.YYTNVFNANGPATSPGTVALSSYDADR.R<br>R.YVPGTTIGQEGEGR.D<br>R.TREVELALTGR.I<br>K.TPSADALAVGGTVSANSFGAWDVSADVAPNLGGGAFAFR.L<br>R.TDEKLSPR.I<br>R.IFLGLEYDQDSTNQR.N<br>R.GSGGVINR.V<br>R.TILVIGK.S<br>R.FFSYAYQDQIFGSHVDLVGR.V<br>R.ITPNWQVSGGYTWQDAHRK.N<br>R.RNGTLNGLDLANIVPTVSFGLVR.N<br>R.GVPSIATAGRPNR.P<br>R.YDRFEIK.G<br>R.VAFQVNVENLFDERYSDAHNLLNITPGAPINAR.F<br>R.SLVNIEK.V<br>R.SIADVLR.Y<br>R.NVGMGLGVHQSSQFAAIR.T<br>R.MINYEVGAK.W<br>R.MINYEVGAK.W |
| YP_617112 | Sala_2070 | nitroreductase                         | 68.02%            | 16                      |                                                                                                                                                                                                                                                                                                                                                                                                                                                                                                                                                                                                                                                                                                                                                                                                                                                                                                                                                                                                                                                                                                                                                                                                                                                                                                                                                                                                                                                                                                                                                                                                                                                                                                                                                                                                                                                                                                                                                                                                                                                                                                                                                                                                                                                                                                                                                                                                                                                                                                                                                                                                                                                                                                                                                                                                                                                                                                                                      |
| YP_617113 | Sala_2071 | nitrogen-fixing NifU-like protein      | 47.37%            | 7                       |                                                                                                                                                                                                                                                                                                                                                                                                                                                                                                                                                                                                                                                                                                                                                                                                                                                                                                                                                                                                                                                                                                                                                                                                                                                                                                                                                                                                                                                                                                                                                                                                                                                                                                                                                                                                                                                                                                                                                                                                                                                                                                                                                                                                                                                                                                                                                                                                                                                                                                                                                                                                                                                                                                                                                                                                                                                                                                                                      |
| YP_617120 | Sala_2078 | chaperonin Cpn10                       | 26.92%            | 2                       |                                                                                                                                                                                                                                                                                                                                                                                                                                                                                                                                                                                                                                                                                                                                                                                                                                                                                                                                                                                                                                                                                                                                                                                                                                                                                                                                                                                                                                                                                                                                                                                                                                                                                                                                                                                                                                                                                                                                                                                                                                                                                                                                                                                                                                                                                                                                                                                                                                                                                                                                                                                                                                                                                                                                                                                                                                                                                                                                      |
| YP_617121 | Sala_2079 | chaperonin GroEL                       | 35.06%            | 14                      |                                                                                                                                                                                                                                                                                                                                                                                                                                                                                                                                                                                                                                                                                                                                                                                                                                                                                                                                                                                                                                                                                                                                                                                                                                                                                                                                                                                                                                                                                                                                                                                                                                                                                                                                                                                                                                                                                                                                                                                                                                                                                                                                                                                                                                                                                                                                                                                                                                                                                                                                                                                                                                                                                                                                                                                                                                                                                                                                      |
| YP_617123 | Sala_2081 | DSBA oxidoreductase                    | 34.88%            | 5                       |                                                                                                                                                                                                                                                                                                                                                                                                                                                                                                                                                                                                                                                                                                                                                                                                                                                                                                                                                                                                                                                                                                                                                                                                                                                                                                                                                                                                                                                                                                                                                                                                                                                                                                                                                                                                                                                                                                                                                                                                                                                                                                                                                                                                                                                                                                                                                                                                                                                                                                                                                                                                                                                                                                                                                                                                                                                                                                                                      |
| YP_617126 | Sala_2084 | FF domain protein                      | 7.77%             | 2                       |                                                                                                                                                                                                                                                                                                                                                                                                                                                                                                                                                                                                                                                                                                                                                                                                                                                                                                                                                                                                                                                                                                                                                                                                                                                                                                                                                                                                                                                                                                                                                                                                                                                                                                                                                                                                                                                                                                                                                                                                                                                                                                                                                                                                                                                                                                                                                                                                                                                                                                                                                                                                                                                                                                                                                                                                                                                                                                                                      |
| YP_617127 | Sala_2085 | transcriptional regulator, TetR family | 18.81%            | 4                       |                                                                                                                                                                                                                                                                                                                                                                                                                                                                                                                                                                                                                                                                                                                                                                                                                                                                                                                                                                                                                                                                                                                                                                                                                                                                                                                                                                                                                                                                                                                                                                                                                                                                                                                                                                                                                                                                                                                                                                                                                                                                                                                                                                                                                                                                                                                                                                                                                                                                                                                                                                                                                                                                                                                                                                                                                                                                                                                                      |
| YP_617130 | Sala_2088 | glutathione S-transferase-like protein | 51.85%            | 8                       |                                                                                                                                                                                                                                                                                                                                                                                                                                                                                                                                                                                                                                                                                                                                                                                                                                                                                                                                                                                                                                                                                                                                                                                                                                                                                                                                                                                                                                                                                                                                                                                                                                                                                                                                                                                                                                                                                                                                                                                                                                                                                                                                                                                                                                                                                                                                                                                                                                                                                                                                                                                                                                                                                                                                                                                                                                                                                                                                      |
| YP_617132 | Sala_2090 | transcriptional regulator, LacI family | 34.91%            | 7                       |                                                                                                                                                                                                                                                                                                                                                                                                                                                                                                                                                                                                                                                                                                                                                                                                                                                                                                                                                                                                                                                                                                                                                                                                                                                                                                                                                                                                                                                                                                                                                                                                                                                                                                                                                                                                                                                                                                                                                                                                                                                                                                                                                                                                                                                                                                                                                                                                                                                                                                                                                                                                                                                                                                                                                                                                                                                                                                                                      |
| YP_617133 | Sala_2091 | TonB-dependent siderophore receptor    | 84.35%            | 60                      |                                                                                                                                                                                                                                                                                                                                                                                                                                                                                                                                                                                                                                                                                                                                                                                                                                                                                                                                                                                                                                                                                                                                                                                                                                                                                                                                                                                                                                                                                                                                                                                                                                                                                                                                                                                                                                                                                                                                                                                                                                                                                                                                                                                                                                                                                                                                                                                                                                                                                                                                                                                                                                                                                                                                                                                                                                                                                                                                      |

| Accession | Locus tag | Description                                 | Sequence coverage | No. peptides identified | List of peptides identified                                                                                                                                                                                                                                                                                                                                                                                                                                                                                                                                                                                                                                                                                                                                                                                                                                                                                                                                                                                                                                                                                                                                                                                                                                                                                                                                                                                                                                                                                                                                                                                                                                                                                                                                                                                                                                                                                                                                                                                                                                                                                                                                                                                                                                                                                                                                                                                                                                                                                                                                                                                                                                                                                                                                                                                                                                                                                                                                                                                                                                                                                                                                                                                                                                     |
|-----------|-----------|---------------------------------------------|-------------------|-------------------------|-----------------------------------------------------------------------------------------------------------------------------------------------------------------------------------------------------------------------------------------------------------------------------------------------------------------------------------------------------------------------------------------------------------------------------------------------------------------------------------------------------------------------------------------------------------------------------------------------------------------------------------------------------------------------------------------------------------------------------------------------------------------------------------------------------------------------------------------------------------------------------------------------------------------------------------------------------------------------------------------------------------------------------------------------------------------------------------------------------------------------------------------------------------------------------------------------------------------------------------------------------------------------------------------------------------------------------------------------------------------------------------------------------------------------------------------------------------------------------------------------------------------------------------------------------------------------------------------------------------------------------------------------------------------------------------------------------------------------------------------------------------------------------------------------------------------------------------------------------------------------------------------------------------------------------------------------------------------------------------------------------------------------------------------------------------------------------------------------------------------------------------------------------------------------------------------------------------------------------------------------------------------------------------------------------------------------------------------------------------------------------------------------------------------------------------------------------------------------------------------------------------------------------------------------------------------------------------------------------------------------------------------------------------------------------------------------------------------------------------------------------------------------------------------------------------------------------------------------------------------------------------------------------------------------------------------------------------------------------------------------------------------------------------------------------------------------------------------------------------------------------------------------------------------------------------------------------------------------------------------------------------------|
| YP_617138 | Sala_2096 | aconitate hydratase 1                       | 61.05%            | 47                      | R.GQNTTADFFLDGVR.D<br>K.YYTNVFANGPATSPGTVALSSYTDATRR.Q<br>K.GPFAMIFGR.G<br>R.VELK.G<br>R.VDAALFVKANER.V<br>R.GVPSIATAPGR.P<br>R.DDVQYFR.S<br>K.GTDLIGAPRPFAR.T<br>R.FVEYYPGLASLADLR.A<br>K.VLEWLL.F<br>K.TSLAPGSQVVTYLVK.A<br>R.AVIVESFER.I<br>R.ANFLASPLVAYALK.G<br>K.VVLTVEVDDVFNADLR.N<br>R.SDENIALVEYAR.A<br>K.LKEGVATDVLTLTATQMLR.A<br>K.GTVTEFTTTPIGQDR.D<br>R.YAHVYQDEHWQK.I<br>K.AFEQVVEIYYR.N<br>K.ADFNSYGAR.R<br>R.SNVLGMLVPLQFTDGGQR.E<br>R.HKADGTPLVIAAGK.E<br>R.IDTANEVEYMMNGILHYVLR.K<br>K.IEVESDYQWR.A<br>K.EGVATDVLTLTATQMLR.A<br>R.FEDGGFTVTDVQALVDWQK.D<br>K.GTNLLGVR.A<br>R.FEDGGFTVSTDDVQALVDWQKDPHSNR.E<br>R.ETLGLTGGDQFTTGVADLKR.Q<br>R.DGKDVFLADWPTNQEVAIAGAVDR.D<br>K.ADGPLVVIAGK.E<br>K.WLMEHQVSK.A<br>K.SYAYSLDK.A<br>R.YGSEVMPYDVAMR.H<br>K.DVFLADWPTNQEVAIAGAVDR.D<br>R.RGHHEVMMR.G<br>K.GTVTEFTTTPIGQDRDGK.D<br>R.YAHVYQDEHWQKIEVGSQYQWR.A<br>R.VLLQDFTGVCVVDLAAMR.D<br>R.VLLQDFTGVCVVDLAAMR.D<br>R.SNVLGMLVPLQFTDGGQR.E<br>R.QVTVWVTRPDGSTFAFDALCR.I<br>R.AQGLWLAADMPDVFDTLELDMGSMVPSLAGPK.R<br>K.LKEGVATDVLTLTATQMLR.A<br>R.YGSEVMPYDVAMR.H<br>R.STLDVGGK.S<br>R.LTGRSDENIALVEYAR.A<br>R.IKNEVPGIEGMSR.Y<br>R.IDTANEVEYMMNGILHYVLR.L<br>R.IDTANEVEYMMNGILHYVLR.K<br>R.EHDIGDGVVIAAITSCTNSNPGMVAAGLVAK.K<br>R.EHDIGDGVVIAAITSCTNSNPGMVAAGLVAK.K<br>R.ATLANHMAPEVGRATGFFGDDK.T<br>K.SYAYSLDKAAAK.L<br>K.INPLVPHLIDHSVMVDFGHPK.A<br>R.TATLDGEAIAGETALFLGR.H<br>R.FGLHPLAVEDALK.A<br>K.VVEYGDQLFVAR.T<br>R.TATSKPTDHYGK.A<br>R.AGNSAAWVELQPLTGR.T<br>K.DRPLTEADVALAESMLHR.D<br>R.VHMAAIGHPIVGDGK.Y<br>K.TPLDDAVIGEEEDGIR.L<br>K.ADVSDRIAVGQR.L<br>R.DATLQAEQAANWLLAWAER.Y<br>R.DAFAQDQWR.I<br>R.YGVEFALTQGVIPDQPAATVAALR.D<br>K.QRDWDNAAR.F<br>K.LAVGPGYSPDIIGDK.S<br>K.WGIEDLDRVYLDGLAR.G<br>R.GDVIFAATGVTDGSLLR.G<br>R.VTEAAIAAAK.L<br>K.IDIADVPLEGTTITAK.A<br>R.VYDLGLAR.G<br>R.HEAIAELR.A<br>K.WGIEDLDR.V<br>K.VGNAPKGP.K.I<br>R.GGLTESVMMR.A<br>R.GAFNTLYMDGTIVIGERDEAPMLYGEK.V<br>K.AADAAMVAMR.G<br>R.VLVLEMVR.V<br>K.AGPNALAVLAIAEEGCLLNAPDVYMDK.L<br>R.RGGGLTESVMMR.A<br>R.GAFNTLYMDGTIVIGERDEAPMLYGEK.V<br>K.SVRENVAAVAR.E<br>K.AADAAMVAMR.G<br>K.LSGGTWQLVISEIPYVAK.G<br>R.FALNLNVLADTR.T<br>K.LVFLVLAEPVMMR.G<br>K.IJIEQVQLIADR.K<br>R.YPLVDGQGNFGNIDGDNAAAYR.Y<br>K.DADGKWEADGIEK.L<br>R.EQDILTAREELAK.L<br>K.GPDFPTGGVAENAEITIAQAYESGR.G<br>R.GVYGLDLSGAR.R<br>R.FFTVGADKLPGR.G<br>R.RTTIAEAPTR.E<br>R.FALNLNVLADTRTK.V<br>K.AGLSLLDHYK.G<br>R.TTIAEAPTR.E<br>R.TRITDLPWR.V<br>R.GHVAPDQWGEFK.F<br>R.VLYALSTTAR.S<br>R.PIAPGDDSVAVVGDNRK.L<br>R.PIAPGDDSVAVVGDNRK.K<br>R.LMVDIDPDAR.I<br>R.IVAMVPASAGGR.L<br>R.EIPDAMIKEPVTILSK.R<br>R.AALVVARPIAPGDDSVAVVGDNRK<br>K.FKEGDELLFAHAQTTDK.L<br>K.AGLSLLDHYKPDFPTGGVAENAEITIAQAYESGR.G<br>K.TTAEVETTDQAR.L<br>R.GHIGPLPTEDDGLFLLTLIDR.T<br>K.LSPVGDADPELLR.A<br>R.TIGSLAEVGMK.T<br>R.NAIEDRLHLAFQPLIEMASGR.V<br>R.LHASNAAFDR.L<br>R.ELVSDSLTGLPNNR.A<br>R.DAPGADHALLLDLAR.F<br>R.AGFEELVEQR.A<br>R.TGGDEFAISTR.I<br>K.AAAVLADWR.Q<br>R.GDLLPASHAAVVAAR.Q<br>R.TGAIDWFGGLADLR.G<br>R.DTLGLDVTVDLATPLVPEVTR.R<br>R.DVHLLAGDPAALR.T<br>R.VAFIGDAASR.I<br>R.LAALLPADVAIAEQVASR.L<br>R.IVAAALDDGGAVK.V<br>R.QLAYAGIEAAR.D<br>R.LFANEAVAGVPAALR.R<br>R.GIAAGPEVAR.I<br>K.AVEAAWVAEDFPAAR.V<br>R.VAELVDK.I<br>R.TLSDWQVPLPVK.G<br>R.TLSDWQVPLPVK.G<br>K.LRDALANLLPEGEDEAYLGTPTLR.D |
| YP_617140 | Sala_2098 | magnesium and cobalt transport protein CorA | 14.24%            | 3                       | R.TATLDGEAIAGETALFLGR.H<br>R.FGLHPLAVEDALK.A<br>K.VVEYGDQLFVAR.T<br>R.TATSKPTDHYGK.A<br>R.AGNSAAWVELQPLTGR.T<br>K.DRPLTEADVALAESMLHR.D<br>R.VHMAAIGHPIVGDGK.Y<br>K.TPLDDAVIGEEEDGIR.L<br>K.ADVSDRIAVGQR.L<br>R.DATLQAEQAANWLLAWAER.Y<br>R.DAFAQDQWR.I<br>R.YGVEFALTQGVIPDQPAATVAALR.D<br>K.QRDWDNAAR.F<br>K.LAVGPGYSPDIIGDK.S<br>K.WGIEDLDRVYLDGLAR.G<br>R.GDVIFAATGVTDGSLLR.G<br>R.VTEAAIAAAK.L<br>K.IDIADVPLEGTTITAK.A<br>R.VYDLGLAR.G<br>R.HEAIAELR.A<br>K.WGIEDLDR.V<br>K.VGNAPKGP.K.I<br>R.GGLTESVMMR.A<br>R.GAFNTLYMDGTIVIGERDEAPMLYGEK.V<br>K.AADAAMVAMR.G<br>R.VLVLEMVR.V<br>K.AGPNALAVLAIAEEGCLLNAPDVYMDK.L<br>R.RGGGLTESVMMR.A<br>R.GAFNTLYMDGTIVIGERDEAPMLYGEK.V<br>K.SVRENVAAVAR.E<br>K.AADAAMVAMR.G<br>K.LSGGTWQLVISEIPYVAK.G<br>R.FALNLNVLADTR.T<br>K.LVFLVLAEPVMMR.G<br>K.IJIEQVQLIADR.K<br>R.YPLVDGQGNFGNIDGDNAAAYR.Y<br>K.DADGKWEADGIEK.L<br>R.EQDILTAREELAK.L<br>K.GPDFPTGGVAENAEITIAQAYESGR.G<br>R.GVYGLDLSGAR.R<br>R.FFTVGADKLPGR.G<br>R.RTTIAEAPTR.E<br>R.FALNLNVLADTRTK.V<br>K.AGLSLLDHYK.G<br>R.TTIAEAPTR.E<br>R.TRITDLPWR.V<br>R.GHVAPDQWGEFK.F<br>R.VLYALSTTAR.S<br>R.PIAPGDDSVAVVGDNRK.L<br>R.PIAPGDDSVAVVGDNRK.K<br>R.LMVDIDPDAR.I<br>R.IVAMVPASAGGR.L<br>R.EIPDAMIKEPVTILSK.R<br>R.AALVVARPIAPGDDSVAVVGDNRK<br>K.FKEGDELLFAHAQTTDK.L<br>K.AGLSLLDHYKPDFPTGGVAENAEITIAQAYESGR.G<br>K.TTAEVETTDQAR.L<br>R.GHIGPLPTEDDGLFLLTLIDR.T<br>K.LSPVGDADPELLR.A<br>R.TIGSLAEVGMK.T<br>R.NAIEDRLHLAFQPLIEMASGR.V<br>R.LHASNAAFDR.L<br>R.ELVSDSLTGLPNNR.A<br>R.DAPGADHALLLDLAR.F<br>R.AGFEELVEQR.A<br>R.TGGDEFAISTR.I<br>K.AAAVLADWR.Q<br>R.GDLLPASHAAVVAAR.Q<br>R.TGAIDWFGGLADLR.G<br>R.DTLGLDVTVDLATPLVPEVTR.R<br>R.DVHLLAGDPAALR.T<br>R.VAFIGDAASR.I<br>R.LAALLPADVAIAEQVASR.L<br>R.IVAAALDDGGAVK.V<br>R.QLAYAGIEAAR.D<br>R.LFANEAVAGVPAALR.R<br>R.GIAAGPEVAR.I<br>K.AVEAAWVAEDFPAAR.V<br>R.VAELVDK.I<br>R.TLSDWQVPLPVK.G<br>R.TLSDWQVPLPVK.G<br>K.LRDALANLLPEGEDEAYLGTPTLR.D                                                                                                                                                                                                                                                                                                                                                                                                                                                                                                                                                                                                                                                                                                                                                                                                                                                                                                                                                                                                                                                                                                                                                                                                                                                                                                                                                                 |
| YP_617144 | Sala_2102 | Pseudouridine synthase, RluD                | 22.22%            | 6                       | R.TATLDGEAIAGETALFLGR.H<br>R.FGLHPLAVEDALK.A<br>K.VVEYGDQLFVAR.T<br>R.TATSKPTDHYGK.A<br>R.AGNSAAWVELQPLTGR.T<br>K.DRPLTEADVALAESMLHR.D<br>R.VHMAAIGHPIVGDGK.Y<br>K.TPLDDAVIGEEEDGIR.L<br>K.ADVSDRIAVGQR.L<br>R.DATLQAEQAANWLLAWAER.Y<br>R.DAFAQDQWR.I<br>R.YGVEFALTQGVIPDQPAATVAALR.D<br>K.QRDWDNAAR.F<br>K.LAVGPGYSPDIIGDK.S<br>K.WGIEDLDRVYLDGLAR.G<br>R.GDVIFAATGVTDGSLLR.G<br>R.VTEAAIAAAK.L<br>K.IDIADVPLEGTTITAK.A<br>R.VYDLGLAR.G<br>R.HEAIAELR.A<br>K.WGIEDLDR.V<br>K.VGNAPKGP.K.I<br>R.GGLTESVMMR.A<br>R.GAFNTLYMDGTIVIGERDEAPMLYGEK.V<br>K.AADAAMVAMR.G<br>R.VLVLEMVR.V<br>K.AGPNALAVLAIAEEGCLLNAPDVYMDK.L<br>R.RGGGLTESVMMR.A<br>R.GAFNTLYMDGTIVIGERDEAPMLYGEK.V<br>K.SVRENVAAVAR.E<br>K.AADAAMVAMR.G<br>K.LSGGTWQLVISEIPYVAK.G<br>R.FALNLNVLADTR.T<br>K.LVFLVLAEPVMMR.G<br>K.IJIEQVQLIADR.K<br>R.YPLVDGQGNFGNIDGDNAAAYR.Y<br>K.DADGKWEADGIEK.L<br>R.EQDILTAREELAK.L<br>K.GPDFPTGGVAENAEITIAQAYESGR.G<br>R.GVYGLDLSGAR.R<br>R.FFTVGADKLPGR.G<br>R.RTTIAEAPTR.E<br>R.FALNLNVLADTRTK.V<br>K.AGLSLLDHYK.G<br>R.TTIAEAPTR.E<br>R.TRITDLPWR.V<br>R.GHVAPDQWGEFK.F<br>R.VLYALSTTAR.S<br>R.PIAPGDDSVAVVGDNRK.L<br>R.PIAPGDDSVAVVGDNRK.K<br>R.LMVDIDPDAR.I<br>R.IVAMVPASAGGR.L<br>R.EIPDAMIKEPVTILSK.R<br>R.AALVVARPIAPGDDSVAVVGDNRK<br>K.FKEGDELLFAHAQTTDK.L<br>K.AGLSLLDHYKPDFPTGGVAENAEITIAQAYESGR.G<br>K.TTAEVETTDQAR.L<br>R.GHIGPLPTEDDGLFLLTLIDR.T<br>K.LSPVGDADPELLR.A<br>R.TIGSLAEVGMK.T<br>R.NAIEDRLHLAFQPLIEMASGR.V<br>R.LHASNAAFDR.L<br>R.ELVSDSLTGLPNNR.A<br>R.DAPGADHALLLDLAR.F<br>R.AGFEELVEQR.A<br>R.TGGDEFAISTR.I<br>K.AAAVLADWR.Q<br>R.GDLLPASHAAVVAAR.Q<br>R.TGAIDWFGGLADLR.G<br>R.DTLGLDVTVDLATPLVPEVTR.R<br>R.DVHLLAGDPAALR.T<br>R.VAFIGDAASR.I<br>R.LAALLPADVAIAEQVASR.L<br>R.IVAAALDDGGAVK.V<br>R.QLAYAGIEAAR.D<br>R.LFANEAVAGVPAALR.R<br>R.GIAAGPEVAR.I<br>K.AVEAAWVAEDFPAAR.V<br>R.VAELVDK.I<br>R.TLSDWQVPLPVK.G<br>R.TLSDWQVPLPVK.G<br>K.LRDALANLLPEGEDEAYLGTPTLR.D                                                                                                                                                                                                                                                                                                                                                                                                                                                                                                                                                                                                                                                                                                                                                                                                                                                                                                                                                                                                                                                                                                                                                                                                                                                                                                                                                                 |
| YP_617146 | Sala_2104 | ATP12 ATPase                                | 28.82%            | 4                       | R.DATLQAEQAANWLLAWAER.Y<br>R.DAFAQDQWR.I<br>R.YGVEFALTQGVIPDQPAATVAALR.D<br>K.QRDWDNAAR.F<br>K.LAVGPGYSPDIIGDK.S<br>K.WGIEDLDRVYLDGLAR.G<br>R.GDVIFAATGVTDGSLLR.G<br>R.VTEAAIAAAK.L<br>K.IDIADVPLEGTTITAK.A<br>R.VYDLGLAR.G<br>R.HEAIAELR.A<br>K.WGIEDLDR.V<br>K.VGNAPKGP.K.I<br>R.GGLTESVMMR.A<br>R.GAFNTLYMDGTIVIGERDEAPMLYGEK.V<br>K.AADAAMVAMR.G<br>R.VLVLEMVR.V<br>K.AGPNALAVLAIAEEGCLLNAPDVYMDK.L<br>R.RGGGLTESVMMR.A<br>R.GAFNTLYMDGTIVIGERDEAPMLYGEK.V<br>K.SVRENVAAVAR.E<br>K.AADAAMVAMR.G<br>K.LSGGTWQLVISEIPYVAK.G<br>R.FALNLNVLADTR.T<br>K.LVFLVLAEPVMMR.G<br>K.IJIEQVQLIADR.K<br>R.YPLVDGQGNFGNIDGDNAAAYR.Y<br>K.DADGKWEADGIEK.L<br>R.EQDILTAREELAK.L<br>K.GPDFPTGGVAENAEITIAQAYESGR.G<br>R.GVYGLDLSGAR.R<br>R.FFTVGADKLPGR.G<br>R.RTTIAEAPTR.E<br>R.FALNLNVLADTRTK.V<br>K.AGLSLLDHYK.G<br>R.TTIAEAPTR.E<br>R.TRITDLPWR.V<br>R.GHVAPDQWGEFK.F<br>R.VLYALSTTAR.S<br>R.PIAPGDDSVAVVGDNRK.L<br>R.PIAPGDDSVAVVGDNRK.K<br>R.LMVDIDPDAR.I<br>R.IVAMVPASAGGR.L<br>R.EIPDAMIKEPVTILSK.R<br>R.AALVVARPIAPGDDSVAVVGDNRK<br>K.FKEGDELLFAHAQTTDK.L<br>K.AGLSLLDHYKPDFPTGGVAENAEITIAQAYESGR.G<br>K.TTAEVETTDQAR.L<br>R.GHIGPLPTEDDGLFLLTLIDR.T<br>K.LSPVGDADPELLR.A<br>R.TIGSLAEVGMK.T<br>R.NAIEDRLHLAFQPLIEMASGR.V<br>R.LHASNAAFDR.L<br>R.ELVSDSLTGLPNNR.A<br>R.DAPGADHALLLDLAR.F<br>R.AGFEELVEQR.A<br>R.TGGDEFAISTR.I<br>K.AAAVLADWR.Q<br>R.GDLLPASHAAVVAAR.Q<br>R.TGAIDWFGGLADLR.G<br>R.DTLGLDVTVDLATPLVPEVTR.R<br>R.DVHLLAGDPAALR.T<br>R.VAFIGDAASR.I<br>R.LAALLPADVAIAEQVASR.L<br>R.IVAAALDDGGAVK.V<br>R.QLAYAGIEAAR.D<br>R.LFANEAVAGVPAALR.R<br>R.GIAAGPEVAR.I<br>K.AVEAAWVAEDFPAAR.V<br>R.VAELVDK.I<br>R.TLSDWQVPLPVK.G<br>R.TLSDWQVPLPVK.G<br>K.LRDALANLLPEGEDEAYLGTPTLR.D                                                                                                                                                                                                                                                                                                                                                                                                                                                                                                                                                                                                                                                                                                                                                                                                                                                                                                                                                                                                                                                                                                                                                                                                                                                                                                                                                                                                                                                                                                                                                                              |
| YP_617149 | Sala_2107 | fructose-1,6-bisphosphatase, class II       | 60.68%            | 18                      | R.DATLQAEQAANWLLAWAER.Y<br>R.DAFAQDQWR.I<br>R.YGVEFALTQGVIPDQPAATVAALR.D<br>K.QRDWDNAAR.F<br>K.LAVGPGYSPDIIGDK.S<br>K.WGIEDLDRVYLDGLAR.G<br>R.GDVIFAATGVTDGSLLR.G<br>R.VTEAAIAAAK.L<br>K.IDIADVPLEGTTITAK.A<br>R.VYDLGLAR.G<br>R.HEAIAELR.A<br>K.WGIEDLDR.V<br>K.VGNAPKGP.K.I<br>R.GGLTESVMMR.A<br>R.GAFNTLYMDGTIVIGERDEAPMLYGEK.V<br>K.AADAAMVAMR.G<br>R.VLVLEMVR.V<br>K.AGPNALAVLAIAEEGCLLNAPDVYMDK.L<br>R.RGGGLTESVMMR.A<br>R.GAFNTLYMDGTIVIGERDEAPMLYGEK.V<br>K.SVRENVAAVAR.E<br>K.AADAAMVAMR.G<br>K.LSGGTWQLVISEIPYVAK.G<br>R.FALNLNVLADTR.T<br>K.LVFLVLAEPVMMR.G<br>K.IJIEQVQLIADR.K<br>R.YPLVDGQGNFGNIDGDNAAAYR.Y<br>K.DADGKWEADGIEK.L<br>R.EQDILTAREELAK.L<br>K.GPDFPTGGVAENAEITIAQAYESGR.G<br>R.GVYGLDLSGAR.R<br>R.FFTVGADKLPGR.G<br>R.RTTIAEAPTR.E<br>R.FALNLNVLADTRTK.V<br>K.AGLSLLDHYK.G<br>R.TTIAEAPTR.E<br>R.TRITDLPWR.V<br>R.GHVAPDQWGEFK.F<br>R.VLYALSTTAR.S<br>R.PIAPGDDSVAVVGDNRK.L<br>R.PIAPGDDSVAVVGDNRK.K<br>R.LMVDIDPDAR.I<br>R.IVAMVPASAGGR.L<br>R.EIPDAMIKEPVTILSK.R<br>R.AALVVARPIAPGDDSVAVVGDNRK<br>K.FKEGDELLFAHAQTTDK.L<br>K.AGLSLLDHYKPDFPTGGVAENAEITIAQAYESGR.G<br>K.TTAEVETTDQAR.L<br>R.GHIGPLPTEDDGLFLLTLIDR.T<br>K.LSPVGDADPELLR.A<br>R.TIGSLAEVGMK.T<br>R.NAIEDRLHLAFQPLIEMASGR.V<br>R.LHASNAAFDR.L<br>R.ELVSDSLTGLPNNR.A<br>R.DAPGADHALLLDLAR.F<br>R.AGFEELVEQR.A<br>R.TGGDEFAISTR.I<br>K.AAAVLADWR.Q<br>R.GDLLPASHAAVVAAR.Q<br>R.TGAIDWFGGLADLR.G<br>R.DTLGLDVTVDLATPLVPEVTR.R<br>R.DVHLLAGDPAALR.T<br>R.VAFIGDAASR.I<br>R.LAALLPADVAIAEQVASR.L<br>R.IVAAALDDGGAVK.V<br>R.QLAYAGIEAAR.D<br>R.LFANEAVAGVPAALR.R<br>R.GIAAGPEVAR.I<br>K.AVEAAWVAEDFPAAR.V<br>R.VAELVDK.I<br>R.TLSDWQVPLPVK.G<br>R.TLSDWQVPLPVK.G<br>K.LRDALANLLPEGEDEAYLGTPTLR.D                                                                                                                                                                                                                                                                                                                                                                                                                                                                                                                                                                                                                                                                                                                                                                                                                                                                                                                                                                                                                                                                                                                                                                                                                                                                                                                                                                                                                                                                                                                                                                              |
| YP_617150 | Sala_2108 | DNA topoisomerase IV, A subunit             | 40.54%            | 25                      | R.DATLQAEQAANWLLAWAER.Y<br>R.DAFAQDQWR.I<br>R.YGVEFALTQGVIPDQPAATVAALR.D<br>K.QRDWDNAAR.F<br>K.LAVGPGYSPDIIGDK.S<br>K.WGIEDLDRVYLDGLAR.G<br>R.GDVIFAATGVTDGSLLR.G<br>R.VTEAAIAAAK.L<br>K.IDIADVPLEGTTITAK.A<br>R.VYDLGLAR.G<br>R.HEAIAELR.A<br>K.WGIEDLDR.V<br>K.VGNAPKGP.K.I<br>R.GGLTESVMMR.A<br>R.GAFNTLYMDGTIVIGERDEAPMLYGEK.V<br>K.AADAAMVAMR.G<br>R.VLVLEMVR.V<br>K.AGPNALAVLAIAEEGCLLNAPDVYMDK.L<br>R.RGGGLTESVMMR.A<br>R.GAFNTLYMDGTIVIGERDEAPMLYGEK.V<br>K.SVRENVAAVAR.E<br>K.AADAAMVAMR.G<br>K.LSGGTWQLVISEIPYVAK.G<br>R.FALNLNVLADTR.T<br>K.LVFLVLAEPVMMR.G<br>K.IJIEQVQLIADR.K<br>R.YPLVDGQGNFGNIDGDNAAAYR.Y<br>K.DADGKWEADGIEK.L<br>R.EQDILTAREELAK.L<br>K.GPDFPTGGVAENAEITIAQAYESGR.G<br>R.GVYGLDLSGAR.R<br>R.FFTVGADKLPGR.G<br>R.RTTIAEAPTR.E<br>R.FALNLNVLADTRTK.V<br>K.AGLSLLDHYK.G<br>R.TTIAEAPTR.E<br>R.TRITDLPWR.V<br>R.GHVAPDQWGEFK.F<br>R.VLYALSTTAR.S<br>R.PIAPGDDSVAVVGDNRK.L<br>R.PIAPGDDSVAVVGDNRK.K<br>R.LMVDIDPDAR.I<br>R.IVAMVPASAGGR.L<br>R.EIPDAMIKEPVTILSK.R<br>R.AALVVARPIAPGDDSVAVVGDNRK<br>K.FKEGDELLFAHAQTTDK.L<br>K.AGLSLLDHYKPDFPTGGVAENAEITIAQAYESGR.G<br>K.TTAEVETTDQAR.L<br>R.GHIGPLPTEDDGLFLLTLIDR.T<br>K.LSPVGDADPELLR.A<br>R.TIGSLAEVGMK.T<br>R.NAIEDRLHLAFQPLIEMASGR.V<br>R.LHASNAAFDR.L<br>R.ELVSDSLTGLPNNR.A<br>R.DAPGADHALLLDLAR.F<br>R.AGFEELVEQR.A<br>R.TGGDEFAISTR.I<br>K.AAAVLADWR.Q<br>R.GDLLPASHAAVVAAR.Q<br>R.TGAIDWFGGLADLR.G<br>R.DTLGLDVTVDLATPLVPEVTR.R<br>R.DVHLLAGDPAALR.T<br>R.VAFIGDAASR.I<br>R.LAALLPADVAIAEQVASR.L<br>R.IVAAALDDGGAVK.V<br>R.QLAYAGIEAAR.D<br>R.LFANEAVAGVPAALR.R<br>R.GIAAGPEVAR.I<br>K.AVEAAWVAEDFPAAR.V<br>R.VAELVDK.I<br>R.TLSDWQVPLPVK.G<br>R.TLSDWQVPLPVK.G<br>K.LRDALANLLPEGEDEAYLGTPTLR.D                                                                                                                                                                                                                                                                                                                                                                                                                                                                                                                                                                                                                                                                                                                                                                                                                                                                                                                                                                                                                                                                                                                                                                                                                                                                                                                                                                                                                                                                                                                                                                              |
| YP_617151 | Sala_2109 | diguanylate cyclase/phosphodiesterase       | 27.02%            | 11                      | R.DATLQAEQAANWLLAWAER.Y<br>R.DAFAQDQWR.I<br>R.YGVEFALTQGVIPDQPAATVAALR.D<br>K.QRDWDNAAR.F<br>K.LAVGPGYSPDIIGDK.S<br>K.WGIEDLDRVYLDGLAR.G<br>R.GDVIFAATGVTDGSLLR.G<br>R.VTEAAIAAAK.L<br>K.IDIADVPLEGTTITAK.A<br>R.VYDLGLAR.G<br>R.HEAIAELR.A<br>K.WGIEDLDR.V<br>K.VGNAPKGP.K.I<br>R.GGLTESVMMR.A<br>R.GAFNTLYMDGTIVIGERDEAPMLYGEK.V<br>K.AADAAMVAMR.G<br>R.VLVLEMVR.V<br>K.AGPNALAVLAIAEEGCLLNAPDVYMDK.L<br>R.RGGGLTESVMMR.A<br>R.GAFNTLYMDGTIVIGERDEAPMLYGEK.V<br>K.SVRENVAAVAR.E<br>K.AADAAMVAMR.G<br>K.LSGGTWQLVISEIPYVAK.G<br>R.FALNLNVLADTR.T<br>K.LVFLVLAEPVMMR.G<br>K.IJIEQVQLIADR.K<br>R.YPLVDGQGNFGNIDGDNAAAYR.Y<br>K.DADGKWEADGIEK.L<br>R.EQDILTAREELAK.L<br>K.GPDFPTGGVAENAEITIAQAYESGR.G<br>R.GVYGLDLSGAR.R<br>R.FFTVGADKLPGR.G<br>R.RTTIAEAPTR.E<br>R.FALNLNVLADTRTK.V<br>K.AGLSLLDHYK.G<br>R.TTIAEAPTR.E<br>R.TRITDLPWR.V<br>R.GHVAPDQWGEFK.F<br>R.VLYALSTTAR.S<br>R.PIAPGDDSVAVVGDNRK.L<br>R.PIAPGDDSVAVVGDNRK.K<br>R.LMVDIDPDAR.I<br>R.IVAMVPASAGGR.L<br>R.EIPDAMIKEPVTILSK.R<br>R.AALVVARPIAPGDDSVAVVGDNRK<br>K.FKEGDELLFAHAQTTDK.L<br>K.AGLSLLDHYKPDFPTGGVAENAEITIAQAYESGR.G<br>K.TTAEVETTDQAR.L<br>R.GHIGPLPTEDDGLFLLTLIDR.T<br>K.LSPVGDADPELLR.A<br>R.TIGSLAEVGMK.T<br>R.NAIEDRLHLAFQPLIEMASGR.V<br>R.LHASNAAFDR.L<br>R.ELVSDSLTGLPNNR.A<br>R.DAPGADHALLLDLAR.F<br>R.AGFEELVEQR.A<br>R.TGGDEFAISTR.I<br>K.AAAVLADWR.Q<br>R.GDLLPASHAAVVAAR.Q<br>R.TGAIDWFGGLADLR.G<br>R.DTLGLDVTVDLATPLVPEVTR.R<br>R.DVHLLAGDPAALR.T<br>R.VAFIGDAASR.I<br>R.LAALLPADVAIAEQVASR.L<br>R.IVAAALDDGGAVK.V<br>R.QLAYAGIEAAR.D<br>R.LFANEAVAGVPAALR.R<br>R.GIAAGPEVAR.I<br>K.AVEAAWVAEDFPAAR.V<br>R.VAELVDK.I<br>R.TLSDWQVPLPVK.G<br>R.TLSDWQVPLPVK.G<br>K.LRDALANLLPEGEDEAYLGTPTLR.D                                                                                                                                                                                                                                                                                                                                                                                                                                                                                                                                                                                                                                                                                                                                                                                                                                                                                                                                                                                                                                                                                                                                                                                                                                                                                                                                                                                                                                                                                                                                                                              |
| YP_617152 | Sala_2110 | Polynucleotide adenyltransferase region     | 46.23%            | 14                      | R.DATLQAEQAANWLLAWAER.Y<br>R.DAFAQDQWR.I<br>R.YGVEFALTQGVIPDQPAATVAALR.D<br>K.QRDWDNAAR.F<br>K.LAVGPGYSPDIIGDK.S<br>K.WGIEDLDRVYLDGLAR.G<br>R.GDVIFAATGVTDGSLLR.G<br>R.VTEAAIAAAK.L<br>K.IDIADVPLEGTTITAK.A<br>R.VYDLGLAR.G<br>R.HEAIAELR.A<br>K.WGIEDLDR.V<br>K.VGNAPKGP.K.I<br>R.GGLTESVMMR.A<br>R.GAFNTLYMDGTIVIGERDEAPMLYGEK.V<br>K.AADAAMVAMR.G<br>R.VLVLEMVR.V<br>K.AGPNALAVLAIAEEGCLLNAPDVYMDK.L<br>R.RGGGLTESVMMR.A<br>R.GAFNTLYMDGTIVIGERDEAPMLYGEK.V<br>K.SVRENVAAVAR.E<br>K.AADAAMVAMR.G<br>K.LSGGTWQLVISEIPYVAK.G<br>R.FALNLNVLADTR.T<br>K.LVFLVLAEPVMMR.G<br>K.IJIEQVQLIADR.K<br>R.YPLVDGQGNFGNIDGDNAAAYR.Y<br>K.DADGKWEADGIEK.L<br>R.EQDILTAREELAK.L<br>K.GPDFPTGGVAENAEITIAQAYESGR.G<br>R.GVYGLDLSGAR.R<br>R.FFTVGADKLPGR.G<br>R.RTTIAEAPTR.E<br>R.FALNLNVLADTRTK.V<br>K.AGLSLLDHYK.G<br>R.TTIAEAPTR.E<br>R.TRITDLPWR.V<br>R.GHVAPDQWGEFK.F<br>R.VLYALSTTAR.S<br>R.PIAPGDDSVAVVGDNRK.L<br>R.PIAPGDDSVAVVGDNRK.K<br>R.LMVDIDPDAR.I<br>R.IVAMVPASAGGR.L<br>R.EIPDAMIKEPVTILSK.R<br>R.AALVVARPIAPGDDSVAVVGDNRK<br>K.FKEGDELLFAHAQTTDK.L<br>K.AGLSLLDHYKPDFPTGGVAENAEITIAQAYESGR.G<br>K.TTAEVETTDQAR.L<br>R.GHIGPLPTEDDGLFLLTLIDR.T<br>K.LSPVGDADPELLR.A<br>R.TIGSLAEVGMK.T<br>R.NAIEDRLHLAFQPLIEMASGR.V<br>R.LHASNAAFDR.L<br>R.ELVSDSLTGLPNNR.A<br>R.DAPGADHALLLDLAR.F<br>R.AGFEELVEQR.A<br>R.TGGDEFAISTR.I<br>K.AAAVLADWR.Q<br>R.GDLLPASHAAVVAAR.Q<br>R.TGAIDWFGGLADLR.G<br>R.DTLGLDVTVDLATPLVPEVTR.R<br>R.DVHLLAGDPAALR.T<br>R.VAFIGDAASR.I<br>R.LAALLPADVAIAEQVASR.L<br>R.IVAAALDDGGAVK.V<br>R.QLAYAGIEAAR.D<br>R.LFANEAVAGVPAALR.R<br>R.GIAAGPEVAR.I<br>K.AVEAAWVAEDFPAAR.V<br>R.VAELVDK.I<br>R.TLSDWQVPLPVK.G<br>R.TLSDWQVPLPVK.G<br>K.LRDALANLLPEGEDEAYLGTPTLR.D                                                                                                                                                                                                                                                                                                                                                                                                                                                                                                                                                                                                                                                                                                                                                                                                                                                                                                                                                                                                                                                                                                                                                                                                                                                                                                                                                                                                                                                                                                                                                                              |
| YP_617153 | Sala_2111 | NUDIX hydrolase                             | 36.60%            | 6                       | R.DATLQAEQAANWLLAWAER.Y<br>R.DAFAQDQWR.I<br>R.YGVEFALTQGVIPDQPAATVAALR.D<br>K.QRDWDNAAR.F<br>K.LAVGPGYSPDIIGDK.S<br>K.WGIEDLDRVYLDGLAR.G<br>R.GDVIFAATGVTDGSLLR.G<br>R.VTEAAIAAAK.L<br>K.IDIADVPLEGTTITAK.A<br>R.VYDLGLAR.G<br>R.HEAIAELR.A<br>K.WGIEDLDR.V<br>K.VGNAPKGP.K.I<br>R.GGLTESVMMR.A<br>R.GAFNTLYMDGTIVIGERDEAPMLYGEK.V<br>K.AADAAMVAMR.G<br>R.VLVLEMVR.V<br>K.AGPNALAVLAIAEEGCLLNAPDVYMDK.L<br>R.RGGGLTESVMMR.A<br>R.GAFNTLYMDGTIVIGERDEAPMLYGEK.V<br>K.SVRENVAAVAR.E<br>K.AADAAMVAMR.G<br>K.LSGGTWQLVISEIPYVAK.G<br>R.FALNLNVLADTR.T<br>K.LVFLVLAEPVMMR.G<br>K.IJIEQVQLIADR.K<br>R.YPLVDGQGNFGNIDGDNAAAYR.Y<br>K.DADGKWEADGIEK.L<br>R.EQDILTAREELAK.L<br>K.GPDFPTGGVAENAEITIAQAYESGR.G<br>R.GVYGLDLSGAR.R<br>R.FFTVGADKLPGR.G<br>R.RTTIAEAPTR.E<br>R.FALNLNVLADTRTK.V<br>K.AGLSLLDHYK.G<br>R.TTIAEAPTR.E<br>R.TRITDLPWR.V<br>R.GHVAPDQWGEFK.F<br>R.VLYALSTTAR.S<br>R.PIAPGDDSVAVVGDNRK.L<br>R.PIAPGDDSVAVVGDNRK.K<br>R.LMVDIDPDAR.I<br>R.IVAMVPASAGGR.L<br>R.EIPDAMIKEPVTILSK.R<br>R.AALVVARPIAPGDDSVAVVGDNRK<br>K.FKEGDELLFAHAQTTDK.L<br>K.AGLSLLDHYKPDFPTGGVAENAEITIAQAYESGR.G<br>K.TTAEVETTDQAR.L<br>R.GHIGPLPTEDDGLFLLTLIDR.T<br>K.LSPVGDADPELLR.A<br>R.TIGSLAEVGMK.T<br>R.NAIEDRLHLAFQPLIEMASGR.V<br>R.LHASNAAFDR.L<br>R.ELVSDSLTGLPNNR.A<br>R.DAPGADHALLLDLAR.F<br>R.AGFEELVEQR.A<br>R.TGGDEFAISTR.I<br>K.AAAVLADWR.Q<br>R.GDLLPASHAAVVAAR.Q<br>R.TGAIDWFGGLADLR.G<br>R.DTLGLDVTVDLATPLVPEVTR.R<br>R.DVHLLAGDPAALR.T<br>R.VAFIGDAASR.I<br>R.LAALLPADVAIAEQVASR.L<br>R.IVAAALDDGGAVK.V<br>R.QLAYAGIEAAR.D<br>R.LFANEAVAGVPAALR.R<br>R.GIAAGPEVAR.I<br>K.AVEAAWVAEDFPAAR.V<br>R.VAELVDK.I<br>R.TLSDWQVPLPVK.G<br>R.TLSDWQVPLPVK.G<br>K.LRDALANLLPEGEDEAYLGTPTLR.D                                                                                                                                                                                                                                                                                                                                                                                                                                                                                                                                                                                                                                                                                                                                                                                                                                                                                                                                                                                                                                                                                                                                                                                                                                                                                                                                                                                                                                                                                                                                                                              |

| Accession | Locus tag | Description                                   | Sequence coverage | No. peptides identified | List of peptides identified                                                                                                                                                                                                                                                                                                                                                                                                                                                                                                                                                                                                                                                                                                                                                                                                                                                                                                                                                                                                                                                                                                                                                                                                                                                                                                                                                                                                                                                                                                                                                                                                                                                                                                                                                                                                                                                                                                                                           |
|-----------|-----------|-----------------------------------------------|-------------------|-------------------------|-----------------------------------------------------------------------------------------------------------------------------------------------------------------------------------------------------------------------------------------------------------------------------------------------------------------------------------------------------------------------------------------------------------------------------------------------------------------------------------------------------------------------------------------------------------------------------------------------------------------------------------------------------------------------------------------------------------------------------------------------------------------------------------------------------------------------------------------------------------------------------------------------------------------------------------------------------------------------------------------------------------------------------------------------------------------------------------------------------------------------------------------------------------------------------------------------------------------------------------------------------------------------------------------------------------------------------------------------------------------------------------------------------------------------------------------------------------------------------------------------------------------------------------------------------------------------------------------------------------------------------------------------------------------------------------------------------------------------------------------------------------------------------------------------------------------------------------------------------------------------------------------------------------------------------------------------------------------------|
| YP_617154 | Sala_2112 | protein of unknown function DUF1285           | 45.88%            | 6                       | R.SHAGQVAFPGGK.I<br>R.EAEEIEGLSR.H<br>R.DAAVLIAFDTR.A<br>R.HDVMAGATEPFR.S<br>R.DALANLLPEGDEAYLGTPTLR.D<br>R.EADGSHLVTPAEK.L<br>R.FAAQTLPPVSWHPER.S<br>R.GTIGNGLEAR.I<br>K.LAIVAEEDTPFR.A<br>R.LDIDDVLVLAGPDLHFLSGSDPDRPDR.L<br>R.ADGSWYHEGGR.I<br>R.SPGEADPVAEALAEAGVSHR.F<br>R.FAADLSDPAEVALVPAVIER.F<br>R.VNAVAPGLTATGDYSAQVER.L<br>R.VAHPVPDQJAYSLSK.A<br>R.AEAVTGGQITFDGGAHLAPLGR.D<br>R.ALVAASEGR.R                                                                                                                                                                                                                                                                                                                                                                                                                                                                                                                                                                                                                                                                                                                                                                                                                                                                                                                                                                                                                                                                                                                                                                                                                                                                                                                                                                                                                                                                                                                                                              |
| YP_617157 | Sala_2115 | short-chain dehydrogenase/reductase SDR       | 43.87%            | 6                       | R.GEVLAAAFTEENGR.R<br>R.LPYGLAAFAFTENGR.R<br>K.ESGFGESESGPEGLDGYLVTK.A<br>R.RIPALCALVADAK.A<br>R.GEVLAAAFDYFAEQGK.R<br>R.DERPVPNATAGTIAALPVATSADLDEALAAAER.G<br>R.KVSFTGSTAVGK.H<br>K.VSFTGSTAVGK.H<br>K.IGSGLDADTQMPLANAR.R<br>R.VDHIATLLLEQKPIAEAR.G<br>R.IVDSIESGMVGNVFNVISALDTPFGGK.E<br>K.HPVGPVAGFSWNPVNLVVK.K<br>R.NAGQVCISPTR.F<br>R.HLLASPVIR.K<br>R.ERVDHIATLLLEQKPIAEAR.G<br>K.APEETPGCTSAVMR.C<br>K.IAPALAAQCVIAK.A<br>R.VFLIWESWLR.H<br>R.TDDAPEYLRPFVYAEPAAGR.V<br>R.IDIATGAVEVLYQSGDHGVVLR.G<br>K.QVIATPGGGPNGLAIGPDGK.L<br>R.QDAVITLSGTR.L<br>R.LPVWFAVITVESAVEGVAAGER.F<br>K.AGPGGTDVTPR.R<br>R.LVEEAREPLAQQR.V<br>K.SHWDAQADVEGLPGQR.Q<br>R.IADWGGAAFGAK.I<br>K.IAEAWTAFMDVAPR.L<br>R.IEALLEGYR.A<br>R.WAIDIDRDDITQAR.L<br>R.FGYYPMASDAVLTGK.A<br>R.VISYDQIMLNAAAPALVDMAGNAVTR.V<br>R.KGGEAALAYR.E<br>K.TAIGLGLTK.Q<br>K.KGGEAALAYR.E<br>R.AEIDAAAFDLSFASEAR.A<br>R.VNAADPDGNAWAR.F<br>R.SEELAAEVAIMAR.F<br>R.AMGHELEGEAVLAVLAGAVRPMVAALDTLK.A                                                                                                                                                                                                                                                                                                                                                                                                                                                                                                                                                                                                                                                                                                                                                                                                                                                                                                                                                                                                      |
| YP_617159 | Sala_2117 | hypothetical protein                          | 14.57%            | 2                       | K.DLTASNAGIDGELGK.L<br>R.TGVTLVAEQK.E<br>K.SFDGQDYLGR.G<br>K.ADESGNLIIFR.K<br>R.DAGVKDLTASNAGIDGELGK.L<br>R.GIFADLAIK.G<br>R.ICVAEVEIEVPTGSLDPDCHLPGIYVK.R<br>K.MISSYVGENKEFER.Q<br>R.NFNQPMATAAR.I<br>R.AGGAGIPGFYR.T<br>K.GWKADESGNLIIFR.K<br>R.LLIELAPGVTAEVAAK.T<br>K.QTISELPQSAFSSADSFAMIR.G<br>K.VVVDHIITDLAVFR.R<br>R.RDDHDSFRL.L<br>K.IIVVMEHNAK.D<br>R.SNFGSLAALR.D<br>R.VLLSGSSGWLGR.H<br>R.NGHEVIGLDVVPVHVVHVTGADR.A<br>R.FGGPWLAGADFTAVDAFFAPVAFR.I<br>R.AFSPTGQVPLLEHGR.T<br>R.QALAEQWREESHEALAAAGVITADYR.V<br>R.IRELFEEGLAR.F<br>R.TIHDSLGIALYLADR.H<br>R.TYGLDVGAGQAWVDHMLAHFAMLEWER.Q<br>R.IEPFTKPSNYEER.A<br>R.HAGVWPTDPRAR.A<br>R.MYELITANR.N<br>R.VEGDVGRVSAK.D<br>R.HLHVETSPQAFAGLR.A<br>K.WAIVVPGSGLVK.A<br>R.AGLIAPDETTFAV.LK.G<br>R.RPDLTAVDPHNVPTFR.K<br>K.GADWDAVAVWK.S<br>K.IWDAHVVER.R<br>K.DAAGNRLPIADPESAAQLAALEK.N<br>K.AQAEAEGLDR.I<br>R.LTISNMAIEGAR.A<br>K.VVVIDAADIAPSVTWTGSPEDVVPITGTPDPAFSPDPSKR.A<br>K.SLTDPGATYK.V<br>K.DIILHTIGTGAAGGTGHVIEYTSAIR.A<br>R.LNAFSDTEAPYQSR.D<br>R.LAGMGPVLLSGDQAHFQENYDSEGVPEFNTDR.A<br>K.NLGTAVIIQHEPR.D<br>R.HGQQLMVDLGLPTALK.G<br>K.GAAFTDSDMSATVR.T<br>R.DKDFDGR.V<br>R.PAWVNPQFTHWIGGGGAVEPVER.D<br>R.DWDWLDSDRPAWVNPQFTHWIGGGGAVEPVER.D<br>R.DWDWLDSDR.P<br>R.AQTLASFR.F<br>R.EHAAWALSDLGR.V<br>K.NIDTVIPAHWLK.T<br>K.NGLIPVLLPQAADR.L<br>R.VVIAPSYSDIFSGNAV.N<br>R.LLEVAATDPVRIDLEHQTVTTPFQDR.F<br>K.SDAAGAYEDR.L<br>R.LLEVAATDPVR.I<br>R.FTFEIDPFR.K<br>R.QAPILIAGDNFGCGSSR.E<br>R.IDLEHQTVTTPFQDR.F<br>K.EAVGPGGANLIYDAVGGDYAEALR.S<br>R.DAGADEIVVYGR.Q<br>R.FLVVGFAPGPR.L<br>R.LPLNLLK.S<br>R.FKEAVGPGGANLIYDAVGGDYAEALR.S<br>R.LFQLEWQGGK.I<br>R.VTGSVALEDGK.A<br>K.EGDTLLVLGASGGVGAIVELGK.A<br>K.ALLSTATGGPETLVGLGELPR.P<br>R.VVAVGSSSEK.A<br>R.VVAVGSSSEKAAIAR.D<br>K.GQIVIDVK.A<br>K.YQFKPERPAPGGEVAGLVAEVGEGVTGFK.A<br>K.SCDVAGVWGFVAFVAR.E<br>K.ALLSTATGGPETLVGLGELPR.P<br>K.FQPVYGVADAVVAALADATGR.L<br>R.AVQADGAGHVATK.A<br>R.ALHVSIAIGADRSDPSAYGR.S<br>R.AATFLKPLGGGQTFVHADVR.D |
| YP_617160 | Sala_2118 | putative gluconolactonase precursor           | 17.65%            | 3                       | R.QDAVITLSGTR.L<br>R.LPVWFAVITVESAVEGVAAGER.F<br>K.AGPGGTDVTPR.R<br>R.LVEEAREPLAQQR.V<br>K.SHWDAQADVEGLPGQR.Q<br>R.IADWGGAAFGAK.I<br>K.IAEAWTAFMDVAPR.L<br>R.IEALLEGYR.A<br>R.WAIDIDRDDITQAR.L<br>R.FGYYPMASDAVLTGK.A<br>R.VISYDQIMLNAAAPALVDMAGNAVTR.V<br>R.KGGEAALAYR.E<br>K.TAIGLGLTK.Q<br>K.KGGEAALAYR.E<br>R.AEIDAAAFDLSFASEAR.A<br>R.VNAADPDGNAWAR.F<br>R.SEELAAEVAIMAR.F<br>R.AMGHELEGEAVLAVLAGAVRPMVAALDTLK.A                                                                                                                                                                                                                                                                                                                                                                                                                                                                                                                                                                                                                                                                                                                                                                                                                                                                                                                                                                                                                                                                                                                                                                                                                                                                                                                                                                                                                                                                                                                                                 |
| YP_617162 | Sala_2120 | hypothetical protein                          | 49.18%            | 13                      | R.QDAVITLSGTR.L<br>R.LPVWFAVITVESAVEGVAAGER.F<br>K.AGPGGTDVTPR.R<br>R.LVEEAREPLAQQR.V<br>K.SHWDAQADVEGLPGQR.Q<br>R.IADWGGAAFGAK.I<br>K.IAEAWTAFMDVAPR.L<br>R.IEALLEGYR.A<br>R.WAIDIDRDDITQAR.L<br>R.FGYYPMASDAVLTGK.A<br>R.VISYDQIMLNAAAPALVDMAGNAVTR.V<br>R.KGGEAALAYR.E<br>K.TAIGLGLTK.Q<br>K.KGGEAALAYR.E<br>R.AEIDAAAFDLSFASEAR.A<br>R.VNAADPDGNAWAR.F<br>R.SEELAAEVAIMAR.F<br>R.AMGHELEGEAVLAVLAGAVRPMVAALDTLK.A                                                                                                                                                                                                                                                                                                                                                                                                                                                                                                                                                                                                                                                                                                                                                                                                                                                                                                                                                                                                                                                                                                                                                                                                                                                                                                                                                                                                                                                                                                                                                 |
| YP_617163 | Sala_2121 | epoxide hydrolase domain-like phosphatase     | 34.88%            | 4                       | R.AEIDAAAFDLSFASEAR.A<br>R.VNAADPDGNAWAR.F<br>R.SEELAAEVAIMAR.F<br>R.AMGHELEGEAVLAVLAGAVRPMVAALDTLK.A                                                                                                                                                                                                                                                                                                                                                                                                                                                                                                                                                                                                                                                                                                                                                                                                                                                                                                                                                                                                                                                                                                                                                                                                                                                                                                                                                                                                                                                                                                                                                                                                                                                                                                                                                                                                                                                                 |
| YP_617165 | Sala_2123 | 3-oxoacid CoA-transferase, subunit A          | 56.36%            | 11                      | K.DLTASNAGIDGELGK.L<br>R.TGVTLVAEQK.E<br>K.SFDGQDYLGR.G<br>K.ADESGNLIIFR.K<br>R.DAGVKDLTASNAGIDGELGK.L<br>R.GIFADLAIK.G<br>R.ICVAEVEIEVPTGSLDPDCHLPGIYVK.R<br>K.MISSYVGENKEFER.Q<br>R.NFNQPMATAAR.I<br>R.AGGAGIPGFYR.T<br>K.GWKADESGNLIIFR.K<br>R.LLIELAPGVTAEVAAK.T<br>K.QTISELPQSAFSSADSFAMIR.G<br>K.VVVDHIITDLAVFR.R<br>R.RDDHDSFRL.L<br>K.IIVVMEHNAK.D<br>R.SNFGSLAALR.D<br>R.VLLSGSSGWLGR.H<br>R.NGHEVIGLDVVPVHVVHVTGADR.A<br>R.FGGPWLAGADFTAVDAFFAPVAFR.I<br>R.AFSPTGQVPLLEHGR.T<br>R.QALAEQWREESHEALAAAGVITADYR.V<br>R.IRELFEEGLAR.F<br>R.TIHDSLGIALYLADR.H<br>R.TYGLDVGAGQAWVDHMLAHFAMLEWER.Q<br>R.IEPFTKPSNYEER.A<br>R.HAGVWPTDPRAR.A<br>R.MYELITANR.N<br>R.VEGDVGRVSAK.D<br>R.HLHVETSPQAFAGLR.A<br>K.WAIVVPGSGLVK.A<br>R.AGLIAPDETTFAV.LK.G<br>R.RPDLTAVDPHNVPTFR.K<br>K.GADWDAVAVWK.S<br>K.IWDAHVVER.R<br>K.DAAGNRLPIADPESAAQLAALEK.N<br>K.AQAEAEGLDR.I<br>R.LTISNMAIEGAR.A<br>K.VVVIDAADIAPSVTWTGSPEDVVPITGTPDPAFSPDPSKR.A<br>K.SLTDPGATYK.V<br>K.DIILHTIGTGAAGGTGHVIEYTSAIR.A<br>R.LNAFSDTEAPYQSR.D<br>R.LAGMGPVLLSGDQAHFQENYDSEGVPEFNTDR.A<br>K.NLGTAVIIQHEPR.D<br>R.HGQQLMVDLGLPTALK.G<br>K.GAAFTDSDMSATVR.T<br>R.DKDFDGR.V<br>R.PAWVNPQFTHWIGGGGAVEPVER.D<br>R.DWDWLDSDRPAWVNPQFTHWIGGGGAVEPVER.D<br>R.DWDWLDSDR.P<br>R.AQTLASFR.F<br>R.EHAAWALSDLGR.V<br>K.NIDTVIPAHWLK.T<br>K.NGLIPVLLPQAADR.L<br>R.VVIAPSYSDIFSGNAV.N<br>R.LLEVAATDPVRIDLEHQTVTTPFQDR.F<br>K.SDAAGAYEDR.L<br>R.LLEVAATDPVR.I<br>R.FTFEIDPFR.K<br>R.QAPILIAGDNFGCGSSR.E<br>R.IDLEHQTVTTPFQDR.F<br>K.EAVGPGGANLIYDAVGGDYAEALR.S<br>R.DAGADEIVVYGR.Q<br>R.FLVVGFAPGPR.L<br>R.LPLNLLK.S<br>R.FKEAVGPGGANLIYDAVGGDYAEALR.S<br>R.LFQLEWQGGK.I<br>R.VTGSVALEDGK.A<br>K.EGDTLLVLGASGGVGAIVELGK.A<br>K.ALLSTATGGPETLVGLGELPR.P<br>R.VVAVGSSSEK.A<br>R.VVAVGSSSEKAAIAR.D<br>K.GQIVIDVK.A<br>K.YQFKPERPAPGGEVAGLVAEVGEGVTGFK.A<br>K.SCDVAGVWGFVAFVAR.E<br>K.ALLSTATGGPETLVGLGELPR.P<br>K.FQPVYGVADAVVAALADATGR.L<br>R.AVQADGAGHVATK.A<br>R.ALHVSIAIGADRSDPSAYGR.S<br>R.AATFLKPLGGGQTFVHADVR.D |
| YP_617166 | Sala_2124 | 3-oxoacid CoA-transferase, subunit B          | 33.65%            | 5                       | R.AEIDAAAFDLSFASEAR.A<br>R.VNAADPDGNAWAR.F<br>R.SEELAAEVAIMAR.F<br>R.AMGHELEGEAVLAVLAGAVRPMVAALDTLK.A                                                                                                                                                                                                                                                                                                                                                                                                                                                                                                                                                                                                                                                                                                                                                                                                                                                                                                                                                                                                                                                                                                                                                                                                                                                                                                                                                                                                                                                                                                                                                                                                                                                                                                                                                                                                                                                                 |
| YP_617168 | Sala_2126 | NAD-dependent epimerase/dehydratase           | 14.77%            | 3                       | R.SNFGSLAALR.D<br>R.VLLSGSSGWLGR.H<br>R.NGHEVIGLDVVPVHVVHVTGADR.A<br>R.FGGPWLAGADFTAVDAFFAPVAFR.I<br>R.AFSPTGQVPLLEHGR.T<br>R.QALAEQWREESHEALAAAGVITADYR.V<br>R.IRELFEEGLAR.F<br>R.TIHDSLGIALYLADR.H<br>R.TYGLDVGAGQAWVDHMLAHFAMLEWER.Q<br>R.IEPFTKPSNYEER.A<br>R.HAGVWPTDPRAR.A<br>R.MYELITANR.N<br>R.VEGDVGRVSAK.D<br>R.HLHVETSPQAFAGLR.A<br>K.WAIVVPGSGLVK.A<br>R.AGLIAPDETTFAV.LK.G<br>R.RPDLTAVDPHNVPTFR.K<br>K.GADWDAVAVWK.S<br>K.IWDAHVVER.R<br>K.DAAGNRLPIADPESAAQLAALEK.N<br>K.AQAEAEGLDR.I<br>R.LTISNMAIEGAR.A<br>K.VVVIDAADIAPSVTWTGSPEDVVPITGTPDPAFSPDPSKR.A<br>K.SLTDPGATYK.V<br>K.DIILHTIGTGAAGGTGHVIEYTSAIR.A<br>R.LNAFSDTEAPYQSR.D<br>R.LAGMGPVLLSGDQAHFQENYDSEGVPEFNTDR.A<br>K.NLGTAVIIQHEPR.D<br>R.HGQQLMVDLGLPTALK.G<br>K.GAAFTDSDMSATVR.T<br>R.DKDFDGR.V<br>R.PAWVNPQFTHWIGGGGAVEPVER.D<br>R.DWDWLDSDRPAWVNPQFTHWIGGGGAVEPVER.D<br>R.DWDWLDSDR.P<br>R.AQTLASFR.F<br>R.EHAAWALSDLGR.V<br>K.NIDTVIPAHWLK.T<br>K.NGLIPVLLPQAADR.L<br>R.VVIAPSYSDIFSGNAV.N<br>R.LLEVAATDPVRIDLEHQTVTTPFQDR.F<br>K.SDAAGAYEDR.L<br>R.LLEVAATDPVR.I<br>R.FTFEIDPFR.K<br>R.QAPILIAGDNFGCGSSR.E<br>R.IDLEHQTVTTPFQDR.F<br>K.EAVGPGGANLIYDAVGGDYAEALR.S<br>R.DAGADEIVVYGR.Q<br>R.FLVVGFAPGPR.L<br>R.LPLNLLK.S<br>R.FKEAVGPGGANLIYDAVGGDYAEALR.S<br>R.LFQLEWQGGK.I<br>R.VTGSVALEDGK.A<br>K.EGDTLLVLGASGGVGAIVELGK.A<br>K.ALLSTATGGPETLVGLGELPR.P<br>R.VVAVGSSSEK.A<br>R.VVAVGSSSEKAAIAR.D<br>K.GQIVIDVK.A<br>K.YQFKPERPAPGGEVAGLVAEVGEGVTGFK.A<br>K.SCDVAGVWGFVAFVAR.E<br>K.ALLSTATGGPETLVGLGELPR.P<br>K.FQPVYGVADAVVAALADATGR.L<br>R.AVQADGAGHVATK.A<br>R.ALHVSIAIGADRSDPSAYGR.S<br>R.AATFLKPLGGGQTFVHADVR.D                                                                                                                                                                                                                                                                                                                                                               |
| YP_617172 | Sala_2130 | beta-lactamase-like protein                   | 51.06%            | 10                      | R.LNAFSDTEAPYQSR.D<br>R.LAGMGPVLLSGDQAHFQENYDSEGVPEFNTDR.A<br>K.NLGTAVIIQHEPR.D<br>R.HGQQLMVDLGLPTALK.G<br>K.GAAFTDSDMSATVR.T<br>R.DKDFDGR.V<br>R.PAWVNPQFTHWIGGGGAVEPVER.D<br>R.DWDWLDSDRPAWVNPQFTHWIGGGGAVEPVER.D<br>R.DWDWLDSDR.P<br>R.AQTLASFR.F<br>R.EHAAWALSDLGR.V<br>K.NIDTVIPAHWLK.T<br>K.NGLIPVLLPQAADR.L<br>R.VVIAPSYSDIFSGNAV.N<br>R.LLEVAATDPVRIDLEHQTVTTPFQDR.F<br>K.SDAAGAYEDR.L<br>R.LLEVAATDPVR.I<br>R.FTFEIDPFR.K<br>R.QAPILIAGDNFGCGSSR.E<br>R.IDLEHQTVTTPFQDR.F<br>K.EAVGPGGANLIYDAVGGDYAEALR.S<br>R.DAGADEIVVYGR.Q<br>R.FLVVGFAPGPR.L<br>R.LPLNLLK.S<br>R.FKEAVGPGGANLIYDAVGGDYAEALR.S<br>R.LFQLEWQGGK.I<br>R.VTGSVALEDGK.A<br>K.EGDTLLVLGASGGVGAIVELGK.A<br>K.ALLSTATGGPETLVGLGELPR.P<br>R.VVAVGSSSEK.A<br>R.VVAVGSSSEKAAIAR.D<br>K.GQIVIDVK.A<br>K.YQFKPERPAPGGEVAGLVAEVGEGVTGFK.A<br>K.SCDVAGVWGFVAFVAR.E<br>K.ALLSTATGGPETLVGLGELPR.P<br>K.FQPVYGVADAVVAALADATGR.L<br>R.AVQADGAGHVATK.A<br>R.ALHVSIAIGADRSDPSAYGR.S<br>R.AATFLKPLGGGQTFVHADVR.D                                                                                                                                                                                                                                                                                                                                                                                                                                                                                                                                                                                                                                                                                                                                                                                                                                                                                                                                                                                               |
| YP_617173 | Sala_2131 | 3-isopropylmalate dehydratase, small subunit  | 61.93%            | 10                      | R.LNAFSDTEAPYQSR.D<br>R.LAGMGPVLLSGDQAHFQENYDSEGVPEFNTDR.A<br>K.NLGTAVIIQHEPR.D<br>R.HGQQLMVDLGLPTALK.G<br>K.GAAFTDSDMSATVR.T<br>R.DKDFDGR.V<br>R.PAWVNPQFTHWIGGGGAVEPVER.D<br>R.DWDWLDSDRPAWVNPQFTHWIGGGGAVEPVER.D<br>R.DWDWLDSDR.P<br>R.AQTLASFR.F<br>R.EHAAWALSDLGR.V<br>K.NIDTVIPAHWLK.T<br>K.NGLIPVLLPQAADR.L<br>R.VVIAPSYSDIFSGNAV.N<br>R.LLEVAATDPVRIDLEHQTVTTPFQDR.F<br>K.SDAAGAYEDR.L<br>R.LLEVAATDPVR.I<br>R.FTFEIDPFR.K<br>R.QAPILIAGDNFGCGSSR.E<br>R.IDLEHQTVTTPFQDR.F<br>K.EAVGPGGANLIYDAVGGDYAEALR.S<br>R.DAGADEIVVYGR.Q<br>R.FLVVGFAPGPR.L<br>R.LPLNLLK.S<br>R.FKEAVGPGGANLIYDAVGGDYAEALR.S<br>R.LFQLEWQGGK.I<br>R.VTGSVALEDGK.A<br>K.EGDTLLVLGASGGVGAIVELGK.A<br>K.ALLSTATGGPETLVGLGELPR.P<br>R.VVAVGSSSEK.A<br>R.VVAVGSSSEKAAIAR.D<br>K.GQIVIDVK.A<br>K.YQFKPERPAPGGEVAGLVAEVGEGVTGFK.A<br>K.SCDVAGVWGFVAFVAR.E<br>K.ALLSTATGGPETLVGLGELPR.P<br>K.FQPVYGVADAVVAALADATGR.L<br>R.AVQADGAGHVATK.A<br>R.ALHVSIAIGADRSDPSAYGR.S<br>R.AATFLKPLGGGQTFVHADVR.D                                                                                                                                                                                                                                                                                                                                                                                                                                                                                                                                                                                                                                                                                                                                                                                                                                                                                                                                                                                               |
| YP_617174 | Sala_2132 | Alcohol dehydrogenase, zinc-binding           | 59.52%            | 15                      | R.LNAFSDTEAPYQSR.D<br>R.LAGMGPVLLSGDQAHFQENYDSEGVPEFNTDR.A<br>K.NLGTAVIIQHEPR.D<br>R.HGQQLMVDLGLPTALK.G<br>K.GAAFTDSDMSATVR.T<br>R.DKDFDGR.V<br>R.PAWVNPQFTHWIGGGGAVEPVER.D<br>R.DWDWLDSDRPAWVNPQFTHWIGGGGAVEPVER.D<br>R.DWDWLDSDR.P<br>R.AQTLASFR.F<br>R.EHAAWALSDLGR.V<br>K.NIDTVIPAHWLK.T<br>K.NGLIPVLLPQAADR.L<br>R.VVIAPSYSDIFSGNAV.N<br>R.LLEVAATDPVRIDLEHQTVTTPFQDR.F<br>K.SDAAGAYEDR.L<br>R.LLEVAATDPVR.I<br>R.FTFEIDPFR.K<br>R.QAPILIAGDNFGCGSSR.E<br>R.IDLEHQTVTTPFQDR.F<br>K.EAVGPGGANLIYDAVGGDYAEALR.S<br>R.DAGADEIVVYGR.Q<br>R.FLVVGFAPGPR.L<br>R.LPLNLLK.S<br>R.FKEAVGPGGANLIYDAVGGDYAEALR.S<br>R.LFQLEWQGGK.I<br>R.VTGSVALEDGK.A<br>K.EGDTLLVLGASGGVGAIVELGK.A<br>K.ALLSTATGGPETLVGLGELPR.P<br>R.VVAVGSSSEK.A<br>R.VVAVGSSSEKAAIAR.D<br>K.GQIVIDVK.A<br>K.YQFKPERPAPGGEVAGLVAEVGEGVTGFK.A<br>K.SCDVAGVWGFVAFVAR.E<br>K.ALLSTATGGPETLVGLGELPR.P<br>K.FQPVYGVADAVVAALADATGR.L<br>R.AVQADGAGHVATK.A<br>R.ALHVSIAIGADRSDPSAYGR.S<br>R.AATFLKPLGGGQTFVHADVR.D                                                                                                                                                                                                                                                                                                                                                                                                                                                                                                                                                                                                                                                                                                                                                                                                                                                                                                                                                                                               |
| YP_617178 | Sala_2136 | 3-beta hydroxysteroid dehydrogenase/isomerase | 55.45%            | 11                      | R.LNAFSDTEAPYQSR.D<br>R.LAGMGPVLLSGDQAHFQENYDSEGVPEFNTDR.A<br>K.NLGTAVIIQHEPR.D<br>R.HGQQLMVDLGLPTALK.G<br>K.GAAFTDSDMSATVR.T<br>R.DKDFDGR.V<br>R.PAWVNPQFTHWIGGGGAVEPVER.D<br>R.DWDWLDSDRPAWVNPQFTHWIGGGGAVEPVER.D<br>R.DWDWLDSDR.P<br>R.AQTLASFR.F<br>R.EHAAWALSDLGR.V<br>K.NIDTVIPAHWLK.T<br>K.NGLIPVLLPQAADR.L<br>R.VVIAPSYSDIFSGNAV.N<br>R.LLEVAATDPVRIDLEHQTVTTPFQDR.F<br>K.SDAAGAYEDR.L<br>R.LLEVAATDPVR.I<br>R.FTFEIDPFR.K<br>R.QAPILIAGDNFGCGSSR.E<br>R.IDLEHQTVTTPFQDR.F<br>K.EAVGPGGANLIYDAVGGDYAEALR.S<br>R.DAGADEIVVYGR.Q<br>R.FLVVGFAPGPR.L<br>R.LPLNLLK.S<br>R.FKEAVGPGGANLIYDAVGGDYAEALR.S<br>R.LFQLEWQGGK.I<br>R.VTGSVALEDGK.A<br>K.EGDTLLVLGASGGVGAIVELGK.A<br>K.ALLSTATGGPETLVGLGELPR.P<br>R.VVAVGSSSEK.A<br>R.VVAVGSSSEKAAIAR.D<br>K.GQIVIDVK.A<br>K.YQFKPERPAPGGEVAGLVAEVGEGVTGFK.A<br>K.SCDVAGVWGFVAFVAR.E<br>K.ALLSTATGGPETLVGLGELPR.P<br>K.FQPVYGVADAVVAALADATGR.L<br>R.AVQADGAGHVATK.A<br>R.ALHVSIAIGADRSDPSAYGR.S<br>R.AATFLKPLGGGQTFVHADVR.D                                                                                                                                                                                                                                                                                                                                                                                                                                                                                                                                                                                                                                                                                                                                                                                                                                                                                                                                                                                               |

| Accession | Locus tag | Description                            | Sequence coverage | No. peptides identified | List of peptides identified                                                                                                                                                                                                                                                                                                                                                                                                                                                                                                                                                                                                                                                                                                                                                                                                                                                                                                                                                                                                                                                                                                                                                                                                                                                                                                                                                                                                                                                                                                                                                                                                                                                                                                                                                                                                                                                                                                                                                                                                                                                                                                                                                                                                                                                                                                                                                                                                                                                                                                                                                                                                                                                                                                                                                                                                                                                                                                                                                                                                                                                                                                                                                                                                                                                                                                                     |
|-----------|-----------|----------------------------------------|-------------------|-------------------------|-------------------------------------------------------------------------------------------------------------------------------------------------------------------------------------------------------------------------------------------------------------------------------------------------------------------------------------------------------------------------------------------------------------------------------------------------------------------------------------------------------------------------------------------------------------------------------------------------------------------------------------------------------------------------------------------------------------------------------------------------------------------------------------------------------------------------------------------------------------------------------------------------------------------------------------------------------------------------------------------------------------------------------------------------------------------------------------------------------------------------------------------------------------------------------------------------------------------------------------------------------------------------------------------------------------------------------------------------------------------------------------------------------------------------------------------------------------------------------------------------------------------------------------------------------------------------------------------------------------------------------------------------------------------------------------------------------------------------------------------------------------------------------------------------------------------------------------------------------------------------------------------------------------------------------------------------------------------------------------------------------------------------------------------------------------------------------------------------------------------------------------------------------------------------------------------------------------------------------------------------------------------------------------------------------------------------------------------------------------------------------------------------------------------------------------------------------------------------------------------------------------------------------------------------------------------------------------------------------------------------------------------------------------------------------------------------------------------------------------------------------------------------------------------------------------------------------------------------------------------------------------------------------------------------------------------------------------------------------------------------------------------------------------------------------------------------------------------------------------------------------------------------------------------------------------------------------------------------------------------------------------------------------------------------------------------------------------------------|
| YP_617180 | Sala_2138 | glutamate synthase, small subunit      | 68.96%            | 32                      | R.AAFTGAAILRPSIIFGR.E<br>R.SKGDGEAAVR.A<br>R.AVQGSDAVHNLVGFADDMR.A<br>R.LFELGSPVLTMR.E<br>R.MQTFDQQLTIVLGGGGFLGR.Y<br>R.LAPVMPVIAPQAK.F<br>R.MQTFDQQLTIVLGGGGFLGR.Y<br>R.VGPTGQSGVIGVAGPAGLTAAYLR.A<br>K.ALGFDPPEELPHLFGAPDLSVTR.W<br>R.EINVPNGEAEVIAALDYLVASNR.K<br>K.YITDTAWAEGWVEPLR.V<br>R.YSAPDADAQAAR.C<br>R.QKHDAILIATGVYK.A<br>R.EVANAEEGVFVWLSAPESFTADR.H<br>R.AGGLTYGIPGFK.L<br>R.GASLWVWGR.D<br>R.VDHTMTMTSLPGVFAAGDIVR.G<br>R.KGFGDAVPAFDDGR.L<br>R.DRENMPGSQR.E<br>R.AGGLTYGIPGFKLEK.D<br>R.AAGHDVHVYDR.H<br>K.AREINVPNGEAEVIAALDYLVASNR.K<br>R.RFDVADMVIAK.A<br>K.HDAILIATGVYK.A<br>R.LGAPDASGR.R<br>R.FDVADMVIAK.A<br>R.DGRDVSQMAK.W<br>R.AAGHDVHVYDRHDR.A<br>K.GFGDAVPAFDDGR.LNAGK.H<br>K.GFGDAVPAFDDGR.L<br>R.RFDVADMVIAK.A<br>R.LREAYELSNATSTMPICGR.I<br>R.LAAGGIQFHLGFEVGDATLDGLR.Q<br>K.HVVVIGGGDTAMDCVR.T<br>K.EVAVAGRL<br>R.VDHTMTMTSLPGVFAAGDIVR.G<br>R.KGFGDAVPAFDDGR.LNAGK.H<br>R.EAYELSNATSTMPICGR.I<br>K.HVVVIGGGDTAMDCVR.T<br>R.QRVELEAAYR.K<br>R.KAEAAVEK.A<br>K.TGVESDKIAALDDATK.G<br>R.LAIAEQTTAALPTGSIEK.M<br>R.VEELAAAYR.K<br>R.QLADLSDGELAK.L<br>K.EMDEVITLVEK.M<br>K.GIADLFDPHRK.E<br>K.EREDQTR.L<br>K.MQKEMDEVITLVEK.M<br>R.QNFSQVTNPPIDSLR.E<br>R.GGYNFEAVLSR.A<br>K.VAQGAKPGEQGQLPGFK.V<br>R.GAEHLDDLDLNPILAK.V<br>K.LVSSAGITVAAGVAK.A<br>K.GFLAELADFPDLANL.L<br>K.AHADVILVAGTGTGASQTSVK.Y<br>R.YKPYANGDNANSNIK.Q<br>R.FFDIAAASGHK.V<br>R.SELFLSDQNIQEDR.V<br>R.LASSHWEGVIAK.A<br>R.FANLANLDEK.G<br>K.AVSGEGGEASER.Y<br>R.YSTNTFPQWVLAQPRR.C<br>R.NPVPDSDAQILNDAKPLFER.G<br>K.LLIVFEAWASDPDVEAHR.A<br>K.GLADPHVQRL<br>K.IAGAADYAR.V<br>R.ALVNDLFPMPAK.I<br>K.ISGEGYQSLFINATEKHEAAFDGR.V<br>R.LAVGMIFLPR.T<br>R.VTTLPIGGFYR.Q<br>R.TRPEIEQIMIAGPLPEEQSIDFEK.Q<br>R.VVEAAIEALR.A<br>R.GVADLPPIYLR.D<br>K.VINLMTFIAEEVR.E<br>K.GQSDHVLVIDSPVLVGGDWDRLR.A<br>R.ANGESIVWQR.L<br>K.MGIAVSSYR.G<br>R.ANGESIVWQR.L<br>K.PGEGGQLPGFK.V<br>K.ISGEGYQSLFINATEK.H<br>R.RVVEAAIEALR.A<br>R.DLMFENYPAQGVPLDSVEATEIR.K<br>K.YAGTPWEMGLSEVNVQTLNLGLR.H<br>R.LRPGQMIAVDLDEGKVEYDR.A<br>R.IIVRPTVSSPLVQHSIVGNTVLYGATAGTLAAGQAGER.F<br>R.SAEVLDTHAFVAVLVGGATTVHAYLAETIADR.H<br>K.GQSDHVLVIDSPVLVGGDWDRLR.L<br>K.DKIAGAADYAR.V<br>R.VTTLADNLLVGSSEGMVLLPEASVR.K<br>R.KAIDDELGLK.I<br>K.WSAEILADWDR.W<br>R.PTVSSPLVQHSIVGNTVLYGATAGTLAAGQAGER.F<br>R.ASLPAWDRSELLR.R<br>K.HEAADFGR.V<br>R.GAVDADGHTGDGAGIHVDLPER.F<br>R.VAIFHQYR.Y<br>R.TRPEIEQIMIAGPLPEEQSIDFEK.Q<br>R.TDLGAQEER.T<br>R.REAEDAVR.A<br>R.QVAAGLTMEDMELLAPMVEDAK.E<br>R.MQLTYNVR.N<br>R.MQLTYNVR.N<br>R.LTHSLNEAEVVAEE<br>R.LGPGQMIAVDLDEGK.V<br>R.LAVGMIFLPR.T<br>R.HATPGVTLISPPPHDIYSIEDLAQLYDLK.Q<br>R.GLFGSELTLDCCR.Q<br>R.GAVDADGHTGDGAGIHVDLPER.F<br>R.FVTPGMSLGLSPEAHETLAJAMNR.I<br>R.FANLANLDEKQSDHVLVIDSPVLVGGDWDRLR.L<br>R.DLMFENYPAQGVPLDSVEATEIR.K<br>R.CLAHNGEINTIR.G<br>R.AYFGDAVADICTFFVGGDASTLR.D<br>R.AMYAYLASVHEFWDPALAMTDGR.W<br>R.ALVNDLFPMPAK.I<br>R.AGRDAPTAK.L<br>K.VTEFIAR.L<br>K.VIAAQIADFYICLSAR.S<br>K.MGIAVSSYR.G<br>R.TDGLKTKGR.D<br>R.SVASINVR.S<br>R.SQGNFRNPVPDSDAQILNDAKPLFER.G<br>R.QVPPDVSIVGDK.A<br>R.QNFSQVTNPPIDSLRER.H<br>R.NPVPDSDAQILNDAK.P<br>R.LGPGQMIAVDLDEGKVEYDR.A<br>R.DLMFENYPAQGVPLDSVEATEIR.K<br>K.YAGTPWEMGLSEVNVQTLNLGLR.H<br>K.GFLAELADFPDLANLKFESR.V<br>K.EAVGSMGDDTPLAVISDKPR.H<br>K.ALVEDHAK.A<br>K.AIDDELKILAK.M<br>R.DEFIDLNPAGR.T<br>K.AANNHLDYIDYIDHR.T<br>K.GVGYELVR.E<br>R.GQVLDSMAIAEYFEETVEGK.A |
| YP_617181 | Sala_2139 | hypothetical protein                   | 26.79%            | 10                      | R.QRVELEAAYR.K<br>R.KAEAAVEK.A<br>K.TGVESDKIAALDDATK.G<br>R.LAIAEQTTAALPTGSIEK.M<br>R.VEELAAAYR.K<br>R.QLADLSDGELAK.L<br>K.EMDEVITLVEK.M<br>K.GIADLFDPHRK.E<br>K.EREDQTR.L<br>K.MQKEMDEVITLVEK.M<br>R.QNFSQVTNPPIDSLR.E<br>R.GGYNFEAVLSR.A<br>K.VAQGAKPGEQGQLPGFK.V<br>R.GAEHLDDLDLNPILAK.V<br>K.LVSSAGITVAAGVAK.A<br>K.GFLAELADFPDLANL.L<br>K.AHADVILVAGTGTGASQTSVK.Y<br>R.YKPYANGDNANSNIK.Q<br>R.FFDIAAASGHK.V<br>R.SELFLSDQNIQEDR.V<br>R.LASSHWEGVIAK.A<br>R.FANLANLDEK.G<br>K.AVSGEGGEASER.Y<br>R.YSTNTFPQWVLAQPRR.C<br>R.NPVPDSDAQILNDAKPLFER.G<br>K.LLIVFEAWASDPDVEAHR.A<br>K.GLADPHVQRL<br>K.IAGAADYAR.V<br>R.ALVNDLFPMPAK.I<br>K.ISGEGYQSLFINATEKHEAAFDGR.V<br>R.LAVGMIFLPR.T<br>R.VTTLPIGGFYR.Q<br>R.TRPEIEQIMIAGPLPEEQSIDFEK.Q<br>R.VVEAAIEALR.A<br>R.GVADLPPIYLR.D<br>K.VINLMTFIAEEVR.E<br>K.GQSDHVLVIDSPVLVGGDWDRLR.A<br>R.ANGESIVWQR.L<br>K.MGIAVSSYR.G<br>R.ANGESIVWQR.L<br>K.PGEGGQLPGFK.V<br>K.ISGEGYQSLFINATEK.H<br>R.RVVEAAIEALR.A<br>R.DLMFENYPAQGVPLDSVEATEIR.K<br>K.YAGTPWEMGLSEVNVQTLNLGLR.H<br>R.LRPGQMIAVDLDEGKVEYDR.A<br>R.IIVRPTVSSPLVQHSIVGNTVLYGATAGTLAAGQAGER.F<br>R.SAEVLDTHAFVAVLVGGATTVHAYLAETIADR.H<br>K.GQSDHVLVIDSPVLVGGDWDRLR.L<br>K.DKIAGAADYAR.V<br>R.VTTLADNLLVGSSEGMVLLPEASVR.K<br>R.KAIDDELGLK.I<br>K.WSAEILADWDR.W<br>R.PTVSSPLVQHSIVGNTVLYGATAGTLAAGQAGER.F<br>R.ASLPAWDRSELLR.R<br>K.HEAADFGR.V<br>R.GAVDADGHTGDGAGIHVDLPER.F<br>R.VAIFHQYR.Y<br>R.TRPEIEQIMIAGPLPEEQSIDFEK.Q<br>R.TDLGAQEER.T<br>R.REAEDAVR.A<br>R.QVAAGLTMEDMELLAPMVEDAK.E<br>R.MQLTYNVR.N<br>R.MQLTYNVR.N<br>R.LTHSLNEAEVVAEE<br>R.LGPGQMIAVDLDEGK.V<br>R.LAVGMIFLPR.T<br>R.HATPGVTLISPPPHDIYSIEDLAQLYDLK.Q<br>R.GLFGSELTLDCCR.Q<br>R.GAVDADGHTGDGAGIHVDLPER.F<br>R.FVTPGMSLGLSPEAHETLAJAMNR.I<br>R.FANLANLDEKQSDHVLVIDSPVLVGGDWDRLR.L<br>R.DLMFENYPAQGVPLDSVEATEIR.K<br>R.CLAHNGEINTIR.G<br>R.AYFGDAVADICTFFVGGDASTLR.D<br>R.AMYAYLASVHEFWDPALAMTDGR.W<br>R.ALVNDLFPMPAK.I<br>R.AGRDAPTAK.L<br>K.VTEFIAR.L<br>K.VIAAQIADFYICLSAR.S<br>K.MGIAVSSYR.G<br>R.TDGLKTKGR.D<br>R.SVASINVR.S<br>R.SQGNFRNPVPDSDAQILNDAKPLFER.G<br>R.QVPPDVSIVGDK.A<br>R.QNFSQVTNPPIDSLRER.H<br>R.NPVPDSDAQILNDAK.P<br>R.LGPGQMIAVDLDEGKVEYDR.A<br>R.DLMFENYPAQGVPLDSVEATEIR.K<br>K.YAGTPWEMGLSEVNVQTLNLGLR.H<br>K.GFLAELADFPDLANLKFESR.V<br>K.EAVGSMGDDTPLAVISDKPR.H<br>K.ALVEDHAK.A<br>K.AIDDELKILAK.M<br>R.DEFIDLNPAGR.T<br>K.AANNHLDYIDYIDHR.T<br>K.GVGYELVR.E<br>R.GQVLDSMAIAEYFEETVEGK.A                                                                                                                                                                                                                                                                                                                                                                                                                                                                                                                                                                                                                                                                                                                                                                                                                                                                                                                                                           |
| YP_617182 | Sala_2140 | Glutamate synthase (ferredoxin)        | 65.89%            | 84                      | R.QRVELEAAYR.K<br>R.KAEAAVEK.A<br>K.TGVESDKIAALDDATK.G<br>R.LAIAEQTTAALPTGSIEK.M<br>R.VEELAAAYR.K<br>R.QLADLSDGELAK.L<br>K.EMDEVITLVEK.M<br>K.GIADLFDPHRK.E<br>K.EREDQTR.L<br>K.MQKEMDEVITLVEK.M<br>R.QNFSQVTNPPIDSLR.E<br>R.GGYNFEAVLSR.A<br>K.VAQGAKPGEQGQLPGFK.V<br>R.GAEHLDDLDLNPILAK.V<br>K.LVSSAGITVAAGVAK.A<br>K.GFLAELADFPDLANL.L<br>K.AHADVILVAGTGTGASQTSVK.Y<br>R.YKPYANGDNANSNIK.Q<br>R.FFDIAAASGHK.V<br>R.SELFLSDQNIQEDR.V<br>R.LASSHWEGVIAK.A<br>R.FANLANLDEK.G<br>K.AVSGEGGEASER.Y<br>R.YSTNTFPQWVLAQPRR.C<br>R.NPVPDSDAQILNDAKPLFER.G<br>K.LLIVFEAWASDPDVEAHR.A<br>K.GLADPHVQRL<br>K.IAGAADYAR.V<br>R.ALVNDLFPMPAK.I<br>K.ISGEGYQSLFINATEKHEAAFDGR.V<br>R.LAVGMIFLPR.T<br>R.VTTLPIGGFYR.Q<br>R.TRPEIEQIMIAGPLPEEQSIDFEK.Q<br>R.VVEAAIEALR.A<br>R.GVADLPPIYLR.D<br>K.VINLMTFIAEEVR.E<br>K.GQSDHVLVIDSPVLVGGDWDRLR.A<br>R.ANGESIVWQR.L<br>K.MGIAVSSYR.G<br>R.ANGESIVWQR.L<br>K.PGEGGQLPGFK.V<br>K.ISGEGYQSLFINATEK.H<br>R.RVVEAAIEALR.A<br>R.DLMFENYPAQGVPLDSVEATEIR.K<br>K.YAGTPWEMGLSEVNVQTLNLGLR.H<br>R.LRPGQMIAVDLDEGKVEYDR.A<br>R.IIVRPTVSSPLVQHSIVGNTVLYGATAGTLAAGQAGER.F<br>R.SAEVLDTHAFVAVLVGGATTVHAYLAETIADR.H<br>K.GQSDHVLVIDSPVLVGGDWDRLR.L<br>K.DKIAGAADYAR.V<br>R.VTTLADNLLVGSSEGMVLLPEASVR.K<br>R.KAIDDELGLK.I<br>K.WSAEILADWDR.W<br>R.PTVSSPLVQHSIVGNTVLYGATAGTLAAGQAGER.F<br>R.ASLPAWDRSELLR.R<br>K.HEAADFGR.V<br>R.GAVDADGHTGDGAGIHVDLPER.F<br>R.VAIFHQYR.Y<br>R.TRPEIEQIMIAGPLPEEQSIDFEK.Q<br>R.TDLGAQEER.T<br>R.REAEDAVR.A<br>R.QVAAGLTMEDMELLAPMVEDAK.E<br>R.MQLTYNVR.N<br>R.MQLTYNVR.N<br>R.LTHSLNEAEVVAEE<br>R.LGPGQMIAVDLDEGK.V<br>R.LAVGMIFLPR.T<br>R.HATPGVTLISPPPHDIYSIEDLAQLYDLK.Q<br>R.GLFGSELTLDCCR.Q<br>R.GAVDADGHTGDGAGIHVDLPER.F<br>R.FVTPGMSLGLSPEAHETLAJAMNR.I<br>R.FANLANLDEKQSDHVLVIDSPVLVGGDWDRLR.L<br>R.DLMFENYPAQGVPLDSVEATEIR.K<br>R.CLAHNGEINTIR.G<br>R.AYFGDAVADICTFFVGGDASTLR.D<br>R.AMYAYLASVHEFWDPALAMTDGR.W<br>R.ALVNDLFPMPAK.I<br>R.AGRDAPTAK.L<br>K.VTEFIAR.L<br>K.VIAAQIADFYICLSAR.S<br>K.MGIAVSSYR.G<br>R.TDGLKTKGR.D<br>R.SVASINVR.S<br>R.SQGNFRNPVPDSDAQILNDAKPLFER.G<br>R.QVPPDVSIVGDK.A<br>R.QNFSQVTNPPIDSLRER.H<br>R.NPVPDSDAQILNDAK.P<br>R.LGPGQMIAVDLDEGKVEYDR.A<br>R.DLMFENYPAQGVPLDSVEATEIR.K<br>K.YAGTPWEMGLSEVNVQTLNLGLR.H<br>K.GFLAELADFPDLANLKFESR.V<br>K.EAVGSMGDDTPLAVISDKPR.H<br>K.ALVEDHAK.A<br>K.AIDDELKILAK.M<br>R.DEFIDLNPAGR.T<br>K.AANNHLDYIDYIDHR.T<br>K.GVGYELVR.E<br>R.GQVLDSMAIAEYFEETVEGK.A                                                                                                                                                                                                                                                                                                                                                                                                                                                                                                                                                                                                                                                                                                                                                                                                                                                                                                                                                           |
| YP_617184 | Sala_2142 | glutathione S-transferase-like protein | 35.43%            | 6                       | R.QRVELEAAYR.K<br>R.KAEAAVEK.A<br>K.TGVESDKIAALDDATK.G<br>R.LAIAEQTTAALPTGSIEK.M<br>R.VEELAAAYR.K<br>R.QLADLSDGELAK.L<br>K.EMDEVITLVEK.M<br>K.GIADLFDPHRK.E<br>K.EREDQTR.L<br>K.MQKEMDEVITLVEK.M<br>R.QNFSQVTNPPIDSLR.E<br>R.GGYNFEAVLSR.A<br>K.VAQGAKPGEQGQLPGFK.V<br>R.GAEHLDDLDLNPILAK.V<br>K.LVSSAGITVAAGVAK.A<br>K.GFLAELADFPDLANL.L<br>K.AHADVILVAGTGTGASQTSVK.Y<br>R.YKPYANGDNANSNIK.Q<br>R.FFDIAAASGHK.V<br>R.SELFLSDQNIQEDR.V<br>R.LASSHWEGVIAK.A<br>R.FANLANLDEK.G<br>K.AVSGEGGEASER.Y<br>R.YSTNTFPQWVLAQPRR.C<br>R.NPVPDSDAQILNDAKPLFER.G<br>K.LLIVFEAWASDPDVEAHR.A<br>K.GLADPHVQRL<br>K.IAGAADYAR.V<br>R.ALVNDLFPMPAK.I<br>K.ISGEGYQSLFINATEKHEAAFDGR.V<br>R.LAVGMIFLPR.T<br>R.VTTLPIGGFYR.Q<br>R.TRPEIEQIMIAGPLPEEQSIDFEK.Q<br>R.VVEAAIEALR.A<br>R.GVADLPPIYLR.D<br>K.VINLMTFIAEEVR.E<br>K.GQSDHVLVIDSPVLVGGDWDRLR.A<br>R.ANGESIVWQR.L<br>K.MGIAVSSYR.G<br>R.ANGESIVWQR.L<br>K.PGEGGQLPGFK.V<br>K.ISGEGYQSLFINATEK.H<br>R.RVVEAAIEALR.A<br>R.DLMFENYPAQGVPLDSVEATEIR.K<br>K.YAGTPWEMGLSEVNVQTLNLGLR.H<br>R.LRPGQMIAVDLDEGKVEYDR.A<br>R.IIVRPTVSSPLVQHSIVGNTVLYGATAGTLAAGQAGER.F<br>R.SAEVLDTHAFVAVLVGGATTVHAYLAETIADR.H<br>K.GQSDHVLVIDSPVLVGGDWDRLR.L<br>K.DKIAGAADYAR.V<br>R.VTTLADNLLVGSSEGMVLLPEASVR.K<br>R.KAIDDELGLK.I<br>K.WSAEILADWDR.W<br>R.PTVSSPLVQHSIVGNTVLYGATAGTLAAGQAGER.F<br>R.ASLPAWDRSELLR.R<br>K.HEAADFGR.V<br>R.GAVDADGHTGDGAGIHVDLPER.F<br>R.VAIFHQYR.Y<br>R.TRPEIEQIMIAGPLPEEQSIDFEK.Q<br>R.TDLGAQEER.T<br>R.REAEDAVR.A<br>R.QVAAGLTMEDMELLAPMVEDAK.E<br>R.MQLTYNVR.N<br>R.MQLTYNVR.N<br>R.LTHSLNEAEVVAEE<br>R.LGPGQMIAVDLDEGK.V<br>R.LAVGMIFLPR.T<br>R.HATPGVTLISPPPHDIYSIEDLAQLYDLK.Q<br>R.GLFGSELTLDCCR.Q<br>R.GAVDADGHTGDGAGIHVDLPER.F<br>R.FVTPGMSLGLSPEAHETLAJAMNR.I<br>R.FANLANLDEKQSDHVLVIDSPVLVGGDWDRLR.L<br>R.DLMFENYPAQGVPLDSVEATEIR.K<br>R.CLAHNGEINTIR.G<br>R.AYFGDAVADICTFFVGGDASTLR.D<br>R.AMYAYLASVHEFWDPALAMTDGR.W<br>R.ALVNDLFPMPAK.I<br>R.AGRDAPTAK.L<br>K.VTEFIAR.L<br>K.VIAAQIADFYICLSAR.S<br>K.MGIAVSSYR.G<br>R.TDGLKTKGR.D<br>R.SVASINVR.S<br>R.SQGNFRNPVPDSDAQILNDAKPLFER.G<br>R.QVPPDVSIVGDK.A<br>R.QNFSQVTNPPIDSLRER.H<br>R.NPVPDSDAQILNDAK.P<br>R.LGPGQMIAVDLDEGKVEYDR.A<br>R.DLMFENYPAQGVPLDSVEATEIR.K<br>K.YAGTPWEMGLSEVNVQTLNLGLR.H<br>K.GFLAELADFPDLANLKFESR.V<br>K.EAVGSMGDDTPLAVISDKPR.H<br>K.ALVEDHAK.A<br>K.AIDDELKILAK.M<br>R.DEFIDLNPAGR.T<br>K.AANNHLDYIDYIDHR.T<br>K.GVGYELVR.E<br>R.GQVLDSMAIAEYFEETVEGK.A                                                                                                                                                                                                                                                                                                                                                                                                                                                                                                                                                                                                                                                                                                                                                                                                                                                                                                                                                           |



| Accession | Locus tag | Description                                 | Sequence coverage | No. peptides identified | List of peptides identified                                                                                                                                                                                                                                                                                                                                                                                                                                                                                                                                                                                                                                                                                                                                                                                                                                                                                                                                                                                                                                                                                                                                                                                                                                                                                                                                                                                                                                                                                                                                                                                                                                                                                                                                                                                                                                                                                                                                                                                                                                                                                                                                                                                                                                                                                                                                                                                                                                                                                                                                                                                                                                                                                                                                                                                                                                                                                                                                                                                                                                                                                                                                                                                                                                                                                                                                                |
|-----------|-----------|---------------------------------------------|-------------------|-------------------------|----------------------------------------------------------------------------------------------------------------------------------------------------------------------------------------------------------------------------------------------------------------------------------------------------------------------------------------------------------------------------------------------------------------------------------------------------------------------------------------------------------------------------------------------------------------------------------------------------------------------------------------------------------------------------------------------------------------------------------------------------------------------------------------------------------------------------------------------------------------------------------------------------------------------------------------------------------------------------------------------------------------------------------------------------------------------------------------------------------------------------------------------------------------------------------------------------------------------------------------------------------------------------------------------------------------------------------------------------------------------------------------------------------------------------------------------------------------------------------------------------------------------------------------------------------------------------------------------------------------------------------------------------------------------------------------------------------------------------------------------------------------------------------------------------------------------------------------------------------------------------------------------------------------------------------------------------------------------------------------------------------------------------------------------------------------------------------------------------------------------------------------------------------------------------------------------------------------------------------------------------------------------------------------------------------------------------------------------------------------------------------------------------------------------------------------------------------------------------------------------------------------------------------------------------------------------------------------------------------------------------------------------------------------------------------------------------------------------------------------------------------------------------------------------------------------------------------------------------------------------------------------------------------------------------------------------------------------------------------------------------------------------------------------------------------------------------------------------------------------------------------------------------------------------------------------------------------------------------------------------------------------------------------------------------------------------------------------------------------------------------|
| YP_617185 | Sala_2143 | ubiquinone biosynthesis O-methyltransferase | 23.16%            | 5                       | R.TPVWVDQVR.G<br>R.IVHRQPPDSGALR.E<br>R.GVSTSLDINGEGK.G<br>R.LAPGGLMLSTPNR.T<br>K.ILEGAGLEVIDR.T<br>K.VIGIDAAPENIAAAK.D<br>K.LLLVEAER.I<br>R.GGSDTSAVAVAAIK.A<br>R.VQVLSFVEGDEAPK.K<br>R.QLTGIAHDKNEAK.I<br>R.KLDVYTYEEMLELASVGAK.V<br>R.SWLGWQLPIR.T<br>K.VSVLIDETEELAVR.V<br>R.VPDRPGAVANIFGLAAAGINVDMIQNVGR.E<br>R.GINIQAIISTEIK.V<br>R.EKGETDVTFTVPGADLLR.S<br>R.SIDLLESADK.I<br>R.VLHTAYGLDAE<br>R.IADIDTALGAAMAK.G<br>R.EVADGNEVAVVSAMAGETDR.L<br>K.FGGTSMAGTER.I<br>R.YDPAEDYVVASGEQVTSGLLALTLQAMGVPAR.S<br>K.GEVAIVPFGQHMDDGR.I<br>R.VISDDKVAK.V<br>K.SHAGVASTMFR.A<br>K.GETDVTFTVPGADLLR.S<br>K.KGTMIIVSDEEIEHQMER.Q<br>R.SIDLLESADK.D<br>K.LLDVYTYEEMLELASVGAK.V<br>K.FGGTSMAGTER.I<br>R.YLGPVEPDELDLWQDPIAGTKKPSDAEVQAVK.D<br>R.FAPLDSWPDNGLDK.A<br>R.DAGFNVAVFTGGR.G<br>R.AVAEYVAENGHEEK.F<br>K.AVEGSSNDQEVATDR.T<br>R.LLFDYDVELV.S<br>K.IAASGLTVSOLIK.T<br>R.SGQLTNDFVLLDMTNVVK.A<br>K.SLDYYALKDDLK.A<br>R.VLGMHGER.G<br>R.CSLSMADAVLGGVVGLEK.A<br>R.GDATQEQDVESEFVMEPEADAFR.N<br>R.VLDTLDGLR.G<br>R.ADLIFGNSSEL.R.A<br>K.VMNADRFDLA<br>R.LAPQKDWVNEPAMLAR.V<br>K.ASLGLSVPEMTVLIGGLR.V<br>K.TAWASASTFR.K<br>K.DKIAASGLTVSOLIK.T<br>K.SPAGAWQWQPINQKEEDMAPAAWDGKIK.V<br>K.SPAGAWQWQPINQK.E<br>K.ALMTDSQPWWPADYGHYGFPR.M<br>R.FRNDHEAFKDFAR.A<br>R.FRNDHEAFK.D<br>R.DIYWGSEDKVWVQGVQTR.I<br>K.ALMTDSQPWWPADYGHYGFPR.M<br>R.VLDTLDGLRGLSMDAVLGGVVGLEK.A<br>R.VDVEPERDIYWGSEDKVWVQGVQTR.I<br>R.TWQDWVFDHLATELTPNGSPNPMGEDFDYAK.A<br>K.GMETEGPLAIAQMGGLYVNEPQGNPHDDEGMAR.D<br>K.DWVEPAMLAR.V<br>R.DAVASQIDPR.L<br>R.GEAIAYLEMGASVQLGTR.F<br>K.NAGTEAFTAK.Q<br>K.LDKGVDMAAAQLEIEHYWAGALR.R<br>K.HDVGRVFLAGGLPPK.G<br>K.VICFAPTLALAK.K<br>R.NFGVNLTMHPQLFELIDVCAK.H<br>R.LDEPFTDFYEAAY.Y<br>K.FVTANSQVGTGER.A<br>R.GLEESTLVAAYNDIHK.H<br>R.ANEIAQLVATPSAQLEQAPVHLGR.L<br>R.GLEESTLVAAYNDIHK.H<br>R.DRLSTQLFNFAQPPAQR.S<br>R.LSTQLFNFAQPPAQR.S<br>K.YQADVAADWAR.Y<br>R.YAPRPATMTPAATAATPAGPETAATPIVPPSSGR.<br>K.IGLVVAAGSR.G<br>R.TDAAAADQSAQR.L<br>R.EGDLDDASAGTVHVRTPAVQEAFFNAK.L<br>R.DGALELYATR.G<br>R.ITIEHTVADDVEAER.H<br>R.TLNVMPFVSEFWEYEAAR.A<br>R.MHLEDLSNR.L<br>R.DGVPIELMINGLREDVAALDLTGAR.G<br>R.NLGPALLEYDR.R<br>R.LSITPAGVGPVK.A<br>R.GQYEQWALAHQVDLGT.<br>R.GLKQEAHVTR.L<br>R.EDVAALDLTGAR.G<br>R.YDWLSPTVMR.Y<br>R.TEFQFLVSATLPAE.E<br>R.RINEAIDSLTAAEAIER.V<br>R.IVSGQMGTAAQMLGR.Q<br>K.LVDGMGAGVAVFHQPR.I<br>R.GTRPVFIDHLSIIPYEGSTAWAGQR.Q<br>R.SGAPVLPWLIDATNPSAQGWAAAEK.K<br>R.AIFPAGSAQFGAAK.D<br>R.QFGMQLNPLYLWAK.K<br>R.SVVGDFDFGALER.A<br>R.HRPDIFPDYTEEAFLR.Q<br>K.HQFVADAVGK.A<br>R.YANNDTLAVQSLK.A<br>R.GVTFEPVAMDIADFGGR.T<br>K.TGAPLDPAAFFDR.I<br>R.TDAVYMGASGR.I<br>R.AALVASADGDGR.F<br>R.QDAATGAAPLAER.L<br>R.SLAEVVGQEHLTGDAIGR.M<br>R.GSDPQAALYWLAR.M<br>K.GLDVFADAVLTR.R<br>R.ESGAYQWDAINQAVADTYLR.L<br>K.HGQTYLVAPGSSISGFADHLER.Y<br>R.SLGIADDTPIAFLGR.L<br>R.VRQDIATFAPNIVHSSPDR.V<br>R.LVGLYLAQGAAR.V<br>R.VYSPTVAHPDFEPTGDLVSVSPMAIPGR.S<br>R.IALFSGNYNMTTDGANK.A<br>R.GVPHQVVVIGEGPAGDFEGR.L<br>R.AELDDLGEAVDPR.L<br>K.RPPRLDLR.Q<br>R.IEVTDADERR.V<br>R.GSNIVGDLSPIER.K<br>R.NLHFGEQTVDDAVPR.G<br>R.LHPPIDLPEAPSEQR.E<br>R.LGVEVEDVTLGGLAALVAGHVPEVGEILVHPSGWR.I<br>R.GEIIAIPETASFDLAIAPADAGHSR.L<br>R.ESLDEVGMHVK.D<br>R.LTDDAEVHTLNR.D<br>K.ALASLGIANPYADQD.<br>R.AQAAPGEFTLTDIVGR.V<br>R.DLPALLEEQVNAAGHAFVR.S<br>K.YDTSTATVER.I<br>R.VGETIKYDSTATVER.I<br>K.VGQHLGTSWVLDQEMINK.F<br>K.LLELEEK.R<br>K.FADATGDHQFHIDEKAK.Q |
| YP_617186 | Sala_2144 | aspartate kinase                            | 73.98%            | 23                      |                                                                                                                                                                                                                                                                                                                                                                                                                                                                                                                                                                                                                                                                                                                                                                                                                                                                                                                                                                                                                                                                                                                                                                                                                                                                                                                                                                                                                                                                                                                                                                                                                                                                                                                                                                                                                                                                                                                                                                                                                                                                                                                                                                                                                                                                                                                                                                                                                                                                                                                                                                                                                                                                                                                                                                                                                                                                                                                                                                                                                                                                                                                                                                                                                                                                                                                                                                            |
| YP_617188 | Sala_2146 | catalase/peroxidase HPI                     | 59.64%            | 31                      |                                                                                                                                                                                                                                                                                                                                                                                                                                                                                                                                                                                                                                                                                                                                                                                                                                                                                                                                                                                                                                                                                                                                                                                                                                                                                                                                                                                                                                                                                                                                                                                                                                                                                                                                                                                                                                                                                                                                                                                                                                                                                                                                                                                                                                                                                                                                                                                                                                                                                                                                                                                                                                                                                                                                                                                                                                                                                                                                                                                                                                                                                                                                                                                                                                                                                                                                                                            |
| YP_617189 | Sala_2147 | 2-nitropropane dioxygenase, NPD             | 34.13%            | 7                       |                                                                                                                                                                                                                                                                                                                                                                                                                                                                                                                                                                                                                                                                                                                                                                                                                                                                                                                                                                                                                                                                                                                                                                                                                                                                                                                                                                                                                                                                                                                                                                                                                                                                                                                                                                                                                                                                                                                                                                                                                                                                                                                                                                                                                                                                                                                                                                                                                                                                                                                                                                                                                                                                                                                                                                                                                                                                                                                                                                                                                                                                                                                                                                                                                                                                                                                                                                            |
| YP_617190 | Sala_2148 | hypothetical protein                        | 58.70%            | 10                      |                                                                                                                                                                                                                                                                                                                                                                                                                                                                                                                                                                                                                                                                                                                                                                                                                                                                                                                                                                                                                                                                                                                                                                                                                                                                                                                                                                                                                                                                                                                                                                                                                                                                                                                                                                                                                                                                                                                                                                                                                                                                                                                                                                                                                                                                                                                                                                                                                                                                                                                                                                                                                                                                                                                                                                                                                                                                                                                                                                                                                                                                                                                                                                                                                                                                                                                                                                            |
| YP_617191 | Sala_2149 | PTSINtr with GAF domain, PtsP               | 32.03%            | 17                      |                                                                                                                                                                                                                                                                                                                                                                                                                                                                                                                                                                                                                                                                                                                                                                                                                                                                                                                                                                                                                                                                                                                                                                                                                                                                                                                                                                                                                                                                                                                                                                                                                                                                                                                                                                                                                                                                                                                                                                                                                                                                                                                                                                                                                                                                                                                                                                                                                                                                                                                                                                                                                                                                                                                                                                                                                                                                                                                                                                                                                                                                                                                                                                                                                                                                                                                                                                            |
| YP_617194 | Sala_2152 | NoeA host specific nodulation protein       | 26.03%            | 7                       |                                                                                                                                                                                                                                                                                                                                                                                                                                                                                                                                                                                                                                                                                                                                                                                                                                                                                                                                                                                                                                                                                                                                                                                                                                                                                                                                                                                                                                                                                                                                                                                                                                                                                                                                                                                                                                                                                                                                                                                                                                                                                                                                                                                                                                                                                                                                                                                                                                                                                                                                                                                                                                                                                                                                                                                                                                                                                                                                                                                                                                                                                                                                                                                                                                                                                                                                                                            |
| YP_617197 | Sala_2155 | beta-lactamase                              | 12.42%            | 4                       |                                                                                                                                                                                                                                                                                                                                                                                                                                                                                                                                                                                                                                                                                                                                                                                                                                                                                                                                                                                                                                                                                                                                                                                                                                                                                                                                                                                                                                                                                                                                                                                                                                                                                                                                                                                                                                                                                                                                                                                                                                                                                                                                                                                                                                                                                                                                                                                                                                                                                                                                                                                                                                                                                                                                                                                                                                                                                                                                                                                                                                                                                                                                                                                                                                                                                                                                                                            |
| YP_617198 | Sala_2156 | AAA ATPase, central region                  | 13.21%            | 4                       |                                                                                                                                                                                                                                                                                                                                                                                                                                                                                                                                                                                                                                                                                                                                                                                                                                                                                                                                                                                                                                                                                                                                                                                                                                                                                                                                                                                                                                                                                                                                                                                                                                                                                                                                                                                                                                                                                                                                                                                                                                                                                                                                                                                                                                                                                                                                                                                                                                                                                                                                                                                                                                                                                                                                                                                                                                                                                                                                                                                                                                                                                                                                                                                                                                                                                                                                                                            |
| YP_617199 | Sala_2157 | glycosyl transferase, group 1               | 44.42%            | 9                       |                                                                                                                                                                                                                                                                                                                                                                                                                                                                                                                                                                                                                                                                                                                                                                                                                                                                                                                                                                                                                                                                                                                                                                                                                                                                                                                                                                                                                                                                                                                                                                                                                                                                                                                                                                                                                                                                                                                                                                                                                                                                                                                                                                                                                                                                                                                                                                                                                                                                                                                                                                                                                                                                                                                                                                                                                                                                                                                                                                                                                                                                                                                                                                                                                                                                                                                                                                            |
| YP_617200 | Sala_2158 | CBS domain protein                          | 49.36%            | 9                       |                                                                                                                                                                                                                                                                                                                                                                                                                                                                                                                                                                                                                                                                                                                                                                                                                                                                                                                                                                                                                                                                                                                                                                                                                                                                                                                                                                                                                                                                                                                                                                                                                                                                                                                                                                                                                                                                                                                                                                                                                                                                                                                                                                                                                                                                                                                                                                                                                                                                                                                                                                                                                                                                                                                                                                                                                                                                                                                                                                                                                                                                                                                                                                                                                                                                                                                                                                            |
| YP_617201 | Sala_2159 | protein of unknown function UPF0054         | 16.07%            | 2                       |                                                                                                                                                                                                                                                                                                                                                                                                                                                                                                                                                                                                                                                                                                                                                                                                                                                                                                                                                                                                                                                                                                                                                                                                                                                                                                                                                                                                                                                                                                                                                                                                                                                                                                                                                                                                                                                                                                                                                                                                                                                                                                                                                                                                                                                                                                                                                                                                                                                                                                                                                                                                                                                                                                                                                                                                                                                                                                                                                                                                                                                                                                                                                                                                                                                                                                                                                                            |
| YP_617202 | Sala_2160 | MscS Mechanosensitive ion channel           | 12.75%            | 4                       |                                                                                                                                                                                                                                                                                                                                                                                                                                                                                                                                                                                                                                                                                                                                                                                                                                                                                                                                                                                                                                                                                                                                                                                                                                                                                                                                                                                                                                                                                                                                                                                                                                                                                                                                                                                                                                                                                                                                                                                                                                                                                                                                                                                                                                                                                                                                                                                                                                                                                                                                                                                                                                                                                                                                                                                                                                                                                                                                                                                                                                                                                                                                                                                                                                                                                                                                                                            |
| YP_617203 | Sala_2161 | MaoC-like dehydratase                       | 30.26%            | 4                       |                                                                                                                                                                                                                                                                                                                                                                                                                                                                                                                                                                                                                                                                                                                                                                                                                                                                                                                                                                                                                                                                                                                                                                                                                                                                                                                                                                                                                                                                                                                                                                                                                                                                                                                                                                                                                                                                                                                                                                                                                                                                                                                                                                                                                                                                                                                                                                                                                                                                                                                                                                                                                                                                                                                                                                                                                                                                                                                                                                                                                                                                                                                                                                                                                                                                                                                                                                            |



| Accession | Locus tag | Description                                                              | Sequence coverage | No. peptides identified | List of peptides identified                                                                                                                                                                                                                                                                                                                                                                                                                                                                                                                                                                                                                                                                                                                                                                                                                                                                                                                                                                                                                                                                                                                                                                                                                                                                                                                                                                                                                                                                                                                                                                                                                                                                                                                                                                                                                                                                                                                                                                                                                                                                                                                                                                                                                                                                                                                                                                                                                                                                                                                                                                                                                                                                                                                                                                                                                                                                                                                                                                                                                                                                                                                                                                                                                                                                                      |
|-----------|-----------|--------------------------------------------------------------------------|-------------------|-------------------------|------------------------------------------------------------------------------------------------------------------------------------------------------------------------------------------------------------------------------------------------------------------------------------------------------------------------------------------------------------------------------------------------------------------------------------------------------------------------------------------------------------------------------------------------------------------------------------------------------------------------------------------------------------------------------------------------------------------------------------------------------------------------------------------------------------------------------------------------------------------------------------------------------------------------------------------------------------------------------------------------------------------------------------------------------------------------------------------------------------------------------------------------------------------------------------------------------------------------------------------------------------------------------------------------------------------------------------------------------------------------------------------------------------------------------------------------------------------------------------------------------------------------------------------------------------------------------------------------------------------------------------------------------------------------------------------------------------------------------------------------------------------------------------------------------------------------------------------------------------------------------------------------------------------------------------------------------------------------------------------------------------------------------------------------------------------------------------------------------------------------------------------------------------------------------------------------------------------------------------------------------------------------------------------------------------------------------------------------------------------------------------------------------------------------------------------------------------------------------------------------------------------------------------------------------------------------------------------------------------------------------------------------------------------------------------------------------------------------------------------------------------------------------------------------------------------------------------------------------------------------------------------------------------------------------------------------------------------------------------------------------------------------------------------------------------------------------------------------------------------------------------------------------------------------------------------------------------------------------------------------------------------------------------------------------------------|
| YP_617235 | Sala_2193 | Coenzyme A biosynthesis protein                                          | 20.83%            | 4                       | R.VIDGMAQTGDPTATGQGGSLPDLK.A<br>R.VVSGMQYVDIAIQK.G<br>K.EIAIFGGEIHK.F<br>R.LVIGVTTNTRK.S<br>K.SPIFFDDDER.I<br>K.LVDRLVIGVTTNTRK.S<br>R.ATQAEVAEGIDALFDQLLAVPADPR.G<br>R.AAGDLFHVDR.A<br>R.DQATLVEQIAHLGGFGDEAALLR.A<br>R.ARDQATLVEQIAHLGGFGDEAALLR.A<br>K.ALHKDEAAGK.A<br>R.YAALAGGK.R<br>R.DIGLAFQIADDIMDVEGDEALAGK.A<br>K.ATFVTLMGLDR.A<br>R.AAGPAGMAGGQMMDLAAETSDFDLPTVTR.L<br>R.IFYSAASGVGNPVVGSK.T<br>K.ATGGSSALPTPAIGVGVIEDLKG.A<br>R.TGDIVLAVGER.M<br>R.IVFELPDSHQVTLAELR.E<br>R.PVANLNALR.F<br>R.ALDYPIVSGNVSLYNESK.A<br>R.WVIEQYDSQVGSADTVQGGDAALVR.I<br>R.DVFTMGARVIAHLNLR.F<br>R.ADVVPDLGR.T<br>R.ETGMTAYEMMLESQER.M<br>K.MESHNPSPYIEPYQGAATVGGGLR.D<br>K.DVAADLK.A<br>K.RPTVQVGDPTFEK.L<br>R.RWISWQDSQVGSADTVQGGDAALVR.I<br>R.EEGPPPVLDK.A<br>R.ALAMSTDCPTR.Y<br>K.QPELSDVPETKDVAAADLK.A<br>K.LPTEAPWVICGPGENAGVIDIGEGPDGKK.L<br>R.YCVDVPEGCK.Q<br>R.MGHLQSIWLR.E<br>K.RTGDIVLAVGER.M<br>K.KLPTEAPWVICGPGENAGVIDIGEGPDGK.K<br>K.GGVGHLR.M<br>K.ALMTGPIADSR.R<br>K.FLQGLTQLGDR.L<br>R.HESFRDPAFIDLLR.A<br>R.SREEVETGYDAAALDQWAK.R<br>K.QFDRDDFAGFLDLLPDSQDGLPLR.H<br>R.DWAAGDRDVFLLFIAGAK.V<br>R.NPAAAQALIAI.R<br>R.LGPHWQFMATK.Q<br>K.VRNAAAQALIAI.R<br>R.TAQIAHQDIGALLAEPLDAAR.Q<br>R.LGIAEPTVYK.Q<br>R.DTHDLLHILTYGR.D<br>R.VVALRPLFEQTLAALER.E<br>R.TLQGAFAVR.I<br>R.ILGYFREDGK.S<br>R.EADAALFLIDAR.A<br>R.IVDTAGFEDQDAATLPR.M<br>K.GVPLSISGATGK.G<br>R.AGVTPLDEEIAI.W<br>K.WVIAEDPSSLFTNGVR.A<br>R.LALVDLQPVYTR.D<br>R.AALDDGLSQVK.G<br>K.LSVADALHAVFAEVVLLLDATK.G<br>R.LASSPVVADNR.L<br>R.LFVVDTEAVSFAAADTGAK.L<br>R.VSLSNDNSIKVPATAIAIIVLPDPVNAWAQSGGNASK.S<br>K.LWSAAGSSTGK.D<br>R.WTGPILAGGR.L<br>R.VSLSNDNSIK.V<br>R.MASVELVTGQR.S<br>R.TSMALSVTLTDVADPVIDR.G<br>R.DSLFSGGASVDGNVWYATSGVGDVAALNAADGSLWK.V<br>R.GEQAEELIAALDKLEANQR.A<br>R.QTAFEYDYLPEAVIAR.M<br>R.DPASSWFASAELSASAYR.L<br>R.AAATMQLANVK.A<br>K.VAADTQVDR.S<br>K.GAAPAQKTEETK.<br>R.AAESAAEQK.G<br>R.AAATMQLANVK.A<br>K.IAAGTPAYR.A<br>K.VLAPTEIFLQGR.G<br>R.GSYHAAIVDMPFGSYEGSQQAFDNaAR.L<br>R.DMAGVVSQAVQDYADEVR.S<br>R.GIPVMGHVGLTPQAVNLGGYVGR.G<br>K.ETGAAAVKVEGK.V<br>K.GGEPVIMLTAYTR.M<br>R.YRDMAGVVSQAVQDYADEVR.S<br>R.KGGEPIVIMLTAYTR.M<br>R.GIPVMGHVGLTPQAVNLGGYVGR.G<br>K.TLTDSTISR.A<br>R.SFPTEDQYAG.<br>R.GSYHAAIVDMPFGSYEGSQQAFDNaAR.L<br>R.GASGERPEHTLESYALAEQADFIEDPLVLT.K<br>R.AVTGWTFEDFTLAEIK.T<br>K.GGVNPGHGDVGEIEAFLK.T<br>R.HENEISETDVAADR.A<br>K.TGIDGLFSQVNR.E<br>R.RVPVGYPETK.H<br>R.DAHAAGLK.V<br>K.HPSYFASIGLPHAAPMLLELDL.F<br>R.WIDALGWELK.L<br>R.KDGLDPAALQR.W<br>K.AYNSAATLNLLR.A<br>R.ELANYPLVFAEAR.E<br>R.LLDTLNPVHVR.M<br>R.GDIINDIAFEAEGREPPAR.M<br>R.QDSLTTGGWYDTSGHFLWVGDR.T<br>R.DADALAAER.E<br>K.GTSPYTSIEALLPYEQALTR.Q<br>R.SADMEEDGVALPSYR.G<br>K.KYQETAGR.I<br>R.FEGSAHIEYR.G<br>R.AFAGGGYANLHQVNAWTHDFMDR.S<br>R.YGHDKIEAHLPR.L<br>R.DADALAAERELANYPLVFAEAR.E<br>R.LNAGQSLLEFLAEMLNQEMSER.A<br>R.TRFEGSAHIEYR.G<br>R.MAGQFAKPR.S<br>R.LNAGQSLLEFLAEMLNQEMSER.A<br>R.ISEALAFMEACGVTPETVPQIK.G<br>R.ELTNELAR.V<br>K.NWQPHSWR.T<br>K.CGSPLEPDVLLR.L<br>R.SADMEEDGVALPSYR.G<br>R.MAGQFAKPR.S<br>R.AFLQGGDCAESFAEHPNINR.D<br>K.AGAPVSGFSGNAADALFK.A<br>K.AGLEAVPSSATPWLPVPIETQALGGTATFNWGR.N<br>R.NFLDDSDIVLGR.D<br>R.TLDEDEGEADAFIQR.Q<br>K.ILAGDAFEGR.A<br>K.AAGQDGAALR.E<br>R.AFASHNIAK.L<br>R.AADNFSKIFLGGAAEDADLHVALGR.A<br>R.GKPAYDALVR.E<br>R.DIYFLATAEEK.G<br>K.LAIMLFDNAPFGDR.L |
| YP_617236 | Sala_2194 | Polyprenyl synthetase                                                    | 47.06%            | 9                       |                                                                                                                                                                                                                                                                                                                                                                                                                                                                                                                                                                                                                                                                                                                                                                                                                                                                                                                                                                                                                                                                                                                                                                                                                                                                                                                                                                                                                                                                                                                                                                                                                                                                                                                                                                                                                                                                                                                                                                                                                                                                                                                                                                                                                                                                                                                                                                                                                                                                                                                                                                                                                                                                                                                                                                                                                                                                                                                                                                                                                                                                                                                                                                                                                                                                                                                  |
| YP_617239 | Sala_2197 | phosphoribosylformylglycinamide synthase II                              | 41.63%            | 25                      |                                                                                                                                                                                                                                                                                                                                                                                                                                                                                                                                                                                                                                                                                                                                                                                                                                                                                                                                                                                                                                                                                                                                                                                                                                                                                                                                                                                                                                                                                                                                                                                                                                                                                                                                                                                                                                                                                                                                                                                                                                                                                                                                                                                                                                                                                                                                                                                                                                                                                                                                                                                                                                                                                                                                                                                                                                                                                                                                                                                                                                                                                                                                                                                                                                                                                                                  |
| YP_617240 | Sala_2198 | protein of unknown function DUF72                                        | 45.16%            | 8                       |                                                                                                                                                                                                                                                                                                                                                                                                                                                                                                                                                                                                                                                                                                                                                                                                                                                                                                                                                                                                                                                                                                                                                                                                                                                                                                                                                                                                                                                                                                                                                                                                                                                                                                                                                                                                                                                                                                                                                                                                                                                                                                                                                                                                                                                                                                                                                                                                                                                                                                                                                                                                                                                                                                                                                                                                                                                                                                                                                                                                                                                                                                                                                                                                                                                                                                                  |
| YP_617241 | Sala_2199 | Uncharacterized protein involved in ubiquinone biosynthesis-like protein | 16.91%            | 3                       |                                                                                                                                                                                                                                                                                                                                                                                                                                                                                                                                                                                                                                                                                                                                                                                                                                                                                                                                                                                                                                                                                                                                                                                                                                                                                                                                                                                                                                                                                                                                                                                                                                                                                                                                                                                                                                                                                                                                                                                                                                                                                                                                                                                                                                                                                                                                                                                                                                                                                                                                                                                                                                                                                                                                                                                                                                                                                                                                                                                                                                                                                                                                                                                                                                                                                                                  |
| YP_617244 | Sala_2202 | hypothetical protein                                                     | 27.61%            | 3                       |                                                                                                                                                                                                                                                                                                                                                                                                                                                                                                                                                                                                                                                                                                                                                                                                                                                                                                                                                                                                                                                                                                                                                                                                                                                                                                                                                                                                                                                                                                                                                                                                                                                                                                                                                                                                                                                                                                                                                                                                                                                                                                                                                                                                                                                                                                                                                                                                                                                                                                                                                                                                                                                                                                                                                                                                                                                                                                                                                                                                                                                                                                                                                                                                                                                                                                                  |
| YP_617245 | Sala_2203 | Small GTP-binding protein domain                                         | 25.66%            | 8                       |                                                                                                                                                                                                                                                                                                                                                                                                                                                                                                                                                                                                                                                                                                                                                                                                                                                                                                                                                                                                                                                                                                                                                                                                                                                                                                                                                                                                                                                                                                                                                                                                                                                                                                                                                                                                                                                                                                                                                                                                                                                                                                                                                                                                                                                                                                                                                                                                                                                                                                                                                                                                                                                                                                                                                                                                                                                                                                                                                                                                                                                                                                                                                                                                                                                                                                                  |
| YP_617246 | Sala_2204 | Pyrrolo-quinoline quinone                                                | 36.49%            | 9                       |                                                                                                                                                                                                                                                                                                                                                                                                                                                                                                                                                                                                                                                                                                                                                                                                                                                                                                                                                                                                                                                                                                                                                                                                                                                                                                                                                                                                                                                                                                                                                                                                                                                                                                                                                                                                                                                                                                                                                                                                                                                                                                                                                                                                                                                                                                                                                                                                                                                                                                                                                                                                                                                                                                                                                                                                                                                                                                                                                                                                                                                                                                                                                                                                                                                                                                                  |
| YP_617247 | Sala_2205 | hypothetical protein                                                     | 43.48%            | 9                       |                                                                                                                                                                                                                                                                                                                                                                                                                                                                                                                                                                                                                                                                                                                                                                                                                                                                                                                                                                                                                                                                                                                                                                                                                                                                                                                                                                                                                                                                                                                                                                                                                                                                                                                                                                                                                                                                                                                                                                                                                                                                                                                                                                                                                                                                                                                                                                                                                                                                                                                                                                                                                                                                                                                                                                                                                                                                                                                                                                                                                                                                                                                                                                                                                                                                                                                  |
| YP_617248 | Sala_2206 | 3-methyl-2-oxobutanoate hydroxymethyltransferase                         | 46.69%            | 12                      |                                                                                                                                                                                                                                                                                                                                                                                                                                                                                                                                                                                                                                                                                                                                                                                                                                                                                                                                                                                                                                                                                                                                                                                                                                                                                                                                                                                                                                                                                                                                                                                                                                                                                                                                                                                                                                                                                                                                                                                                                                                                                                                                                                                                                                                                                                                                                                                                                                                                                                                                                                                                                                                                                                                                                                                                                                                                                                                                                                                                                                                                                                                                                                                                                                                                                                                  |
| YP_617251 | Sala_2209 | glycerophosphoryl diester phosphodiesterase                              | 38.31%            | 8                       |                                                                                                                                                                                                                                                                                                                                                                                                                                                                                                                                                                                                                                                                                                                                                                                                                                                                                                                                                                                                                                                                                                                                                                                                                                                                                                                                                                                                                                                                                                                                                                                                                                                                                                                                                                                                                                                                                                                                                                                                                                                                                                                                                                                                                                                                                                                                                                                                                                                                                                                                                                                                                                                                                                                                                                                                                                                                                                                                                                                                                                                                                                                                                                                                                                                                                                                  |
| YP_617252 | Sala_2210 | hypothetical protein                                                     | 17.24%            | 2                       |                                                                                                                                                                                                                                                                                                                                                                                                                                                                                                                                                                                                                                                                                                                                                                                                                                                                                                                                                                                                                                                                                                                                                                                                                                                                                                                                                                                                                                                                                                                                                                                                                                                                                                                                                                                                                                                                                                                                                                                                                                                                                                                                                                                                                                                                                                                                                                                                                                                                                                                                                                                                                                                                                                                                                                                                                                                                                                                                                                                                                                                                                                                                                                                                                                                                                                                  |
| YP_617254 | Sala_2212 | phospho-2-dehydro-3-deoxyheptonate aldolase                              | 63.46%            | 24                      |                                                                                                                                                                                                                                                                                                                                                                                                                                                                                                                                                                                                                                                                                                                                                                                                                                                                                                                                                                                                                                                                                                                                                                                                                                                                                                                                                                                                                                                                                                                                                                                                                                                                                                                                                                                                                                                                                                                                                                                                                                                                                                                                                                                                                                                                                                                                                                                                                                                                                                                                                                                                                                                                                                                                                                                                                                                                                                                                                                                                                                                                                                                                                                                                                                                                                                                  |
| YP_617255 | Sala_2213 | peptidase M28                                                            | 54.74%            | 18                      |                                                                                                                                                                                                                                                                                                                                                                                                                                                                                                                                                                                                                                                                                                                                                                                                                                                                                                                                                                                                                                                                                                                                                                                                                                                                                                                                                                                                                                                                                                                                                                                                                                                                                                                                                                                                                                                                                                                                                                                                                                                                                                                                                                                                                                                                                                                                                                                                                                                                                                                                                                                                                                                                                                                                                                                                                                                                                                                                                                                                                                                                                                                                                                                                                                                                                                                  |



| Accession | Locus tag | Description                                                        | Sequence coverage | No. peptides identified | List of peptides identified                                                                                                                                                                                                                                                                                                                                                                                                                                                                                                                                                                                                                                                                                                                                                                                                                                                                                                                                                                                                                                                                                                                                                                                                                                                                                                                                                                                                                                                                                                                                                                                                                                                                                                                                                                                                                                                                                                                                                                                                                                                                                                                                                                                                                                                                                                                                                                                                                                                                                                                                                                                                                                                                                                                                                                                                                                                                                                                                                                                                                                                                                                                                                                                                                                                                                                                                                                                                                                                                                                                                                                                                     |
|-----------|-----------|--------------------------------------------------------------------|-------------------|-------------------------|---------------------------------------------------------------------------------------------------------------------------------------------------------------------------------------------------------------------------------------------------------------------------------------------------------------------------------------------------------------------------------------------------------------------------------------------------------------------------------------------------------------------------------------------------------------------------------------------------------------------------------------------------------------------------------------------------------------------------------------------------------------------------------------------------------------------------------------------------------------------------------------------------------------------------------------------------------------------------------------------------------------------------------------------------------------------------------------------------------------------------------------------------------------------------------------------------------------------------------------------------------------------------------------------------------------------------------------------------------------------------------------------------------------------------------------------------------------------------------------------------------------------------------------------------------------------------------------------------------------------------------------------------------------------------------------------------------------------------------------------------------------------------------------------------------------------------------------------------------------------------------------------------------------------------------------------------------------------------------------------------------------------------------------------------------------------------------------------------------------------------------------------------------------------------------------------------------------------------------------------------------------------------------------------------------------------------------------------------------------------------------------------------------------------------------------------------------------------------------------------------------------------------------------------------------------------------------------------------------------------------------------------------------------------------------------------------------------------------------------------------------------------------------------------------------------------------------------------------------------------------------------------------------------------------------------------------------------------------------------------------------------------------------------------------------------------------------------------------------------------------------------------------------------------------------------------------------------------------------------------------------------------------------------------------------------------------------------------------------------------------------------------------------------------------------------------------------------------------------------------------------------------------------------------------------------------------------------------------------------------------------|
|           |           |                                                                    |                   |                         | R.AAMFADKDDGEVDFWATAESLAFGLTLLSEGYQVR.L<br>K.YIPLTIVPHGR.F<br>R.WSGLYAPDTPENARR.N<br>R.SSPYPSDVAK.G<br>R.QQFKR.D<br>R.NNGAWFFVGELEEALAEAGK.K<br>R.LNMLANMAKPYQVIFHEFAGGSANPDDIGGSDVK.Y<br>R.GYNTGGCIHFVNNQIGFTTSPQFAR.S<br>R.GKQALSK.V<br>R.FLQLGAGDNIVQCNISTPSNYFVHLR.R<br>R.FGHNEGDEPSTFQRLMYER.I<br>R.EFDGISVHMSLVPNPSHLEAVDPVVLGK.V<br>R.ASAASPATGLMSR.H<br>K.VGYDLMEAR.D<br>K.GVQAPILHWNGDDPEAVTFACK.L<br>K.VSASPSELGTTLAELK.E<br>K.SIIMIIGEIGDAEEQAAQFLIDEAKR.G<br>R.MGHAGAIVSGKGDAESK.I<br>K.VITQMTGATGTFHTEQALAYGTK.M<br>K.GGTHIIGLPMFNTVEEAK.H<br>K.SIIMIIGEIGDAEEQAAQFLIDEAK.R<br>K.IAAMEAAGIK.V<br>K.IGIMPENIFK.K<br>R.MGHAGAIVSGGK.G<br>K.VSASPSELGTTLAELKER.V<br>K.KPMAGFIAGR.T<br>K.MVGGVTPGK.G<br>K.KGSGVVSRS.S<br>R.MGHAGAIVSGKGDAESK.I<br>R.MGHAGAIVSGGK.G<br>R.LIGPNCVGLTPEECK.I<br>K.VITQMTGATGTFHTEQALAYGTK.M<br>K.SIIMIIGEIGDAEEQAAQFLIDEAK.R<br>K.IAAMEAAGIK.V<br>K.GGTHIIGLPMFNTVEEAK.H<br>K.MVGGVTPGKGTHIIGLPMFNTVEEAK.H<br>K.IGIMPENIFK.K<br>K.IGIMPENIFK.K<br>R.YSTVNGIPVPLVK.M<br>K.ELGDVLFVVEGVPQK.A<br>K.ALDLSQVPIAGFDKAI<br>K.IKSGNDYADJAGADVIVTAGVAR.K<br>R.DDILLINK.V<br>K.IALIGAGNIGGTLALLAAQK.E<br>K.VVGMAGVLSAR.F<br>R.FSHFADEDFVSVK.D<br>K.MGLSSQDKIDAVK.R<br>K.DVNTFVGGHDTMVPVYR.Y<br>R.GGGGEIVALLGTGSAFYAPAASGIAMAEAYLGDQK.R<br>K.IVEIIDDADKAGLQVSDAVK.E<br>R.EFSLPHSK.V<br>K.IVEIIDDADK.A<br>R.FSHFADEDFVSVKDVNTFVGGHDTMVPVYR.Y<br>K.KIALIGAGNIGGTLALLAAQK.E<br>K.AGLQVSDAVK.E<br>R.GGGGEIVALLGTGSAFYAPAASGIAMAEAYLGDQK.R<br>R.TRGGGEIVALLGTGSAFYAPAASGIAMAEAYLGDQK.R<br>R.KPGMSRDLINLK.V<br>R.IILPCAYVDGQVGVGLYVGPVMIAGAGVEK.I<br>R.GGGGEIVALLGTGSAFYAPAASGIAMAEAYLGDQK.R<br>K.VVGMAGVLSAR.F<br>K.MGLSSQDKIDAVK.R<br>K.MGLSSQDKIDAVKR.T<br>K.MGLSSQDKIDAVKR.T<br>K.IALIGAGNIGGTLALLAAQKELGDVLFVVEGVPQK.A<br>K.DVNTFVGGHDTMVPVYR.Y<br>K.ANAPDAFVICTITNPLDAMVWALR.E<br>K.ANAPDAFVICTITNPLDAMVWALR.E<br>R.IILPCAYVDGQVGVGLYVGPVMIAGAGVEK.I<br>R.GGGGEIVALLGTGSAFYAPAASGIAMAEAYLGDQK.R<br>K.MGLSSQDKIDAVK.R<br>R.LNQLQEEIQAVPK.R<br>R.GASDYLAVAR.H<br>R.EHFLPFIALVEER.L<br>R.FVTLIDALYEVK.V<br>R.WFVPADEEASAASAFFR.L<br>R.GVTMVAATSNRPPK.D<br>K.FLGPALLQAVR.W<br>K.AEGATHVRR.F<br>R.YDPKQGNPHFDTFEIDTEK.C<br>R.LDELEDFFR.L<br>K.SEQDSTLTFR.R<br>K.DLVPDFTHFYAQYASIEPWK.T<br>K.MKSEQDSTLTFR.R<br>K.VHKABGATHVK.R<br>R.AYSDHVSADPTALAR.E<br>R.VAEVLAANGAGNAHIR.A<br>R.LAAQHWQVADFEDAAGASTEVR.<br>R.RVAEVLAAANGAGNAHIR.A<br>R.LPILLDALPFR.R<br>R.LAESIGDPPAGAAAR.G<br>R.GAEALLHFLAK.D<br>R.APIFDNDRPTLYAPHFR.R<br>R.AEGLPDTPGASGAR.L<br>R.STLSIIDYQGNPQVYR.Q<br>R.SGAGITVADAGVPGQDILGQAVK.L<br>K.TVFAIEAALQ.Q<br>K.SDATAFGDLPAAHAELK.T<br>K.LDESQJAAITGWLPYFA.<br>R.VGTVSIEGLEWQVDFPQDVEAAEALTK.W<br>R.LLPPDTNAESIGMLAFTGDGSPSIFR.N<br>R.VEDHALQLYR.D<br>R.LIDGVKEPTIVYDVK.A<br>K.AILLSAQGSR.L<br>R.EEMDRDFIILNGDTIVSDEIVAR.L<br>K.ADYDDDDMKVNR.D<br>R.SLSWQVAALVANGIR.D<br>R.TLNFNPFQVADNLGTCWIAR.E<br>R.LLPPDTNAESIGMLAFTGDGSPSIFR.N<br>R.TERVEDHALQLYR.D<br>R.EEMDRDFIILNGDTIVSDEIVAR.L<br>R.DIVVVTGFR.T<br>R.EQGAPLAATFALPDDAIPDAELAR.Q<br>R.ADGVAEGSADVLR.H<br>R.HGLAWLGGDFR.D<br>K.ALHNSDRDAPDILADVLR.G<br>R.VAGQQRDWPAILITPTPHGIR.A<br>R.GLYGIGVPTVEDIAAALGLPK.D<br>R.YIQDTAINR.G<br>R.VGDWVAIGNPLGLGSTVTAGIISAVQR.N<br>K.IDATGLPFVK.F<br>R.AGAPDSFADLVEQLQPAVVNISTK.Q<br>R.GEAVNEVTVLTNQR.E<br>R.RGDAILSANR.T<br>R.DAVILLELR.R<br>K.GLVIAAVAGSSDAGR.K<br>R.DVASDLALK.I<br>R.TPVTSAEALAK.V<br>R.GGSAFAIR.L<br>R.DVTPQQLSYIVANTKPTR.I<br>R.EPITQEQGGSGFLISSDGYIVTNHVISGGPR.G<br>R.NIGQGGAYDR.Y<br>K.GLVIAAVAGSSDAGR.K<br>R.AVGIDPDSKGLVIAAVAGSSDAGR.K<br>R.RGGSAFAIR.L<br>R.LNPFAGTREPITQEQGGSGFLISSDGYIVTNHVISGGPR.G<br>R.DVASDLALKIDATGLPFVK.F<br>R.AGAPDSFADLVEQLQPAVVNISTKQEVTLGVR.L |
| YP_617271 | Sala_2229 | succinyl-CoA synthetase, alpha subunit                             | 57.43%            | 23                      |                                                                                                                                                                                                                                                                                                                                                                                                                                                                                                                                                                                                                                                                                                                                                                                                                                                                                                                                                                                                                                                                                                                                                                                                                                                                                                                                                                                                                                                                                                                                                                                                                                                                                                                                                                                                                                                                                                                                                                                                                                                                                                                                                                                                                                                                                                                                                                                                                                                                                                                                                                                                                                                                                                                                                                                                                                                                                                                                                                                                                                                                                                                                                                                                                                                                                                                                                                                                                                                                                                                                                                                                                                 |
| YP_617272 | Sala_2230 | malate dehydrogenase, NAD-dependent                                | 100.00%           | 32                      |                                                                                                                                                                                                                                                                                                                                                                                                                                                                                                                                                                                                                                                                                                                                                                                                                                                                                                                                                                                                                                                                                                                                                                                                                                                                                                                                                                                                                                                                                                                                                                                                                                                                                                                                                                                                                                                                                                                                                                                                                                                                                                                                                                                                                                                                                                                                                                                                                                                                                                                                                                                                                                                                                                                                                                                                                                                                                                                                                                                                                                                                                                                                                                                                                                                                                                                                                                                                                                                                                                                                                                                                                                 |
| YP_617274 | Sala_2232 | AFG1-like ATPase                                                   | 21.11%            | 6                       |                                                                                                                                                                                                                                                                                                                                                                                                                                                                                                                                                                                                                                                                                                                                                                                                                                                                                                                                                                                                                                                                                                                                                                                                                                                                                                                                                                                                                                                                                                                                                                                                                                                                                                                                                                                                                                                                                                                                                                                                                                                                                                                                                                                                                                                                                                                                                                                                                                                                                                                                                                                                                                                                                                                                                                                                                                                                                                                                                                                                                                                                                                                                                                                                                                                                                                                                                                                                                                                                                                                                                                                                                                 |
| YP_617276 | Sala_2234 | succinate dehydrogenase and fumarate reductase iron-sulfur protein | 36.15%            | 8                       |                                                                                                                                                                                                                                                                                                                                                                                                                                                                                                                                                                                                                                                                                                                                                                                                                                                                                                                                                                                                                                                                                                                                                                                                                                                                                                                                                                                                                                                                                                                                                                                                                                                                                                                                                                                                                                                                                                                                                                                                                                                                                                                                                                                                                                                                                                                                                                                                                                                                                                                                                                                                                                                                                                                                                                                                                                                                                                                                                                                                                                                                                                                                                                                                                                                                                                                                                                                                                                                                                                                                                                                                                                 |
| YP_617278 | Sala_2236 | HAD-superfamily hydrolase subfamily 1B, PSase-like protein         | 24.15%            | 4                       |                                                                                                                                                                                                                                                                                                                                                                                                                                                                                                                                                                                                                                                                                                                                                                                                                                                                                                                                                                                                                                                                                                                                                                                                                                                                                                                                                                                                                                                                                                                                                                                                                                                                                                                                                                                                                                                                                                                                                                                                                                                                                                                                                                                                                                                                                                                                                                                                                                                                                                                                                                                                                                                                                                                                                                                                                                                                                                                                                                                                                                                                                                                                                                                                                                                                                                                                                                                                                                                                                                                                                                                                                                 |
| YP_617279 | Sala_2237 | hypothetical protein                                               | 14.78%            | 4                       |                                                                                                                                                                                                                                                                                                                                                                                                                                                                                                                                                                                                                                                                                                                                                                                                                                                                                                                                                                                                                                                                                                                                                                                                                                                                                                                                                                                                                                                                                                                                                                                                                                                                                                                                                                                                                                                                                                                                                                                                                                                                                                                                                                                                                                                                                                                                                                                                                                                                                                                                                                                                                                                                                                                                                                                                                                                                                                                                                                                                                                                                                                                                                                                                                                                                                                                                                                                                                                                                                                                                                                                                                                 |
| YP_617280 | Sala_2238 | hypothetical protein                                               | 8.45%             | 2                       |                                                                                                                                                                                                                                                                                                                                                                                                                                                                                                                                                                                                                                                                                                                                                                                                                                                                                                                                                                                                                                                                                                                                                                                                                                                                                                                                                                                                                                                                                                                                                                                                                                                                                                                                                                                                                                                                                                                                                                                                                                                                                                                                                                                                                                                                                                                                                                                                                                                                                                                                                                                                                                                                                                                                                                                                                                                                                                                                                                                                                                                                                                                                                                                                                                                                                                                                                                                                                                                                                                                                                                                                                                 |
| YP_617281 | Sala_2239 | histidine triad (HIT) protein                                      | 49.30%            | 4                       |                                                                                                                                                                                                                                                                                                                                                                                                                                                                                                                                                                                                                                                                                                                                                                                                                                                                                                                                                                                                                                                                                                                                                                                                                                                                                                                                                                                                                                                                                                                                                                                                                                                                                                                                                                                                                                                                                                                                                                                                                                                                                                                                                                                                                                                                                                                                                                                                                                                                                                                                                                                                                                                                                                                                                                                                                                                                                                                                                                                                                                                                                                                                                                                                                                                                                                                                                                                                                                                                                                                                                                                                                                 |
| YP_617282 | Sala_2240 | Nucleotidyl transferase                                            | 68.50%            | 13                      |                                                                                                                                                                                                                                                                                                                                                                                                                                                                                                                                                                                                                                                                                                                                                                                                                                                                                                                                                                                                                                                                                                                                                                                                                                                                                                                                                                                                                                                                                                                                                                                                                                                                                                                                                                                                                                                                                                                                                                                                                                                                                                                                                                                                                                                                                                                                                                                                                                                                                                                                                                                                                                                                                                                                                                                                                                                                                                                                                                                                                                                                                                                                                                                                                                                                                                                                                                                                                                                                                                                                                                                                                                 |
| YP_617285 | Sala_2243 | sphingosine kinase                                                 | 31.88%            | 5                       |                                                                                                                                                                                                                                                                                                                                                                                                                                                                                                                                                                                                                                                                                                                                                                                                                                                                                                                                                                                                                                                                                                                                                                                                                                                                                                                                                                                                                                                                                                                                                                                                                                                                                                                                                                                                                                                                                                                                                                                                                                                                                                                                                                                                                                                                                                                                                                                                                                                                                                                                                                                                                                                                                                                                                                                                                                                                                                                                                                                                                                                                                                                                                                                                                                                                                                                                                                                                                                                                                                                                                                                                                                 |
| YP_617289 | Sala_2247 | Peptidase S1C, Do                                                  | 66.80%            | 30                      |                                                                                                                                                                                                                                                                                                                                                                                                                                                                                                                                                                                                                                                                                                                                                                                                                                                                                                                                                                                                                                                                                                                                                                                                                                                                                                                                                                                                                                                                                                                                                                                                                                                                                                                                                                                                                                                                                                                                                                                                                                                                                                                                                                                                                                                                                                                                                                                                                                                                                                                                                                                                                                                                                                                                                                                                                                                                                                                                                                                                                                                                                                                                                                                                                                                                                                                                                                                                                                                                                                                                                                                                                                 |

| Accession | Locus tag | Description                                | Sequence coverage | No. peptides identified | List of peptides identified                                                                                                                                                                                                                                                                                                                                                                                                                                                                                                                                                                                                                                                                                                                                                                                                                                                                                                                                                                                                                                                                                                                                                                                                                                                                                                                                                                                                                                                                                                                                                                                                                                                                                                                                                                                                                                                                                                                                                                                                                                                                                                                                                                                                                                                                                                                                                                                                                                                                                                                                                                                                                                                                                                                                                                                                                                                                                                                                                                                                                                                                                                                                                                              |
|-----------|-----------|--------------------------------------------|-------------------|-------------------------|----------------------------------------------------------------------------------------------------------------------------------------------------------------------------------------------------------------------------------------------------------------------------------------------------------------------------------------------------------------------------------------------------------------------------------------------------------------------------------------------------------------------------------------------------------------------------------------------------------------------------------------------------------------------------------------------------------------------------------------------------------------------------------------------------------------------------------------------------------------------------------------------------------------------------------------------------------------------------------------------------------------------------------------------------------------------------------------------------------------------------------------------------------------------------------------------------------------------------------------------------------------------------------------------------------------------------------------------------------------------------------------------------------------------------------------------------------------------------------------------------------------------------------------------------------------------------------------------------------------------------------------------------------------------------------------------------------------------------------------------------------------------------------------------------------------------------------------------------------------------------------------------------------------------------------------------------------------------------------------------------------------------------------------------------------------------------------------------------------------------------------------------------------------------------------------------------------------------------------------------------------------------------------------------------------------------------------------------------------------------------------------------------------------------------------------------------------------------------------------------------------------------------------------------------------------------------------------------------------------------------------------------------------------------------------------------------------------------------------------------------------------------------------------------------------------------------------------------------------------------------------------------------------------------------------------------------------------------------------------------------------------------------------------------------------------------------------------------------------------------------------------------------------------------------------------------------------|
| YP_617290 | Sala_2248 | band 7 protein                             | 66.78%            | 20                      | R.NIGQGGAYDRYIQTDAINR.G<br>R.GYLGIGIVPTEDIAAALGLPKDR.G<br>R.DAVLLEILRR.G<br>K.IVGRDVASDLALLK.I<br>K.DRGEFVQR.V<br>R.AVGIDPDSK.G<br>K.RGDVVLK.V<br>K.FAQGSPAR.V<br>K.AGRDAVLEILR.R<br>R.LQQQLATILGSSLR.N<br>R.ADLPEGATLEAAYNR.M<br>R.IYAASFGKPEFYDFYR.A<br>R.TFATLLSAER.G<br>R.SGAGLLTFMPFADSVQLDKR.I<br>K.RADLPEGATLEAAYNR.M<br>R.QTFLGENNEGTSIILSPDNEYLKR.F<br>K.YGAAIIDVR.I<br>R.QTFLGENNEGTSIILSPDNEYLKR.R<br>R.VGEVYGT.N<br>R.GAVMDNIQVALNR.E<br>R.GAVMDNIQVALNR.E<br>R.IJGINMER.Q<br>R.GSADGEAAR.I<br>R.TEERLQQQLATILGSSLR.N<br>R.QQVLTSDQQR.L<br>R.LQVDAFAR.F<br>R.QQEASISRAEGQK.E<br>R.GAVMDNIQVALNR.E<br>R.EAQKYGAAIIDVR.I<br>K.DPEFYDFYR.A<br>R.APELFFFQIANPEDITR.E<br>R.DQSIVDLAYER.W<br>R.AYQQQLER.A<br>R.ARGDTSAFDQIYEYR.L<br>K.AIDENFVLR.D<br>R.GGTGGGSGGGGDFADSGR.I<br>R.ATVANFDLVQAIQPGR.V<br>R.AGVTIQIAIR.Q<br>R.GDTSAFDQIYEYR.L<br>R.NPWVTPDPADQR.R<br>R.LYETHEAVLSNVDK.T<br>R.GPSALDELR.K<br>R.NPWVTPDPADQRR.G<br>R.MQALLDEYR.A<br>R.GVTPYLPNEVQR.R<br>R.VEIEAQVSR.M<br>R.LYETHEAVLSNVDKTIVEAR.G<br>R.QADPPSQVDEAFK.E<br>R.QADPPSQVDEAFKVTAR.Q<br>R.GPSALDELR.K<br>R.APELFFFQIANPEDITREVAESAMR.A<br>K.GEDDDGKGGDGK.R<br>R.QEREAANLAR.A<br>R.MQALLDEYR.A<br>K.VGLVDADIVGPSQPR.L<br>R.LMASEDKPEAR.G<br>R.AGLLEQGV.R.E<br>K.HKPGAVIVSTPQDLALMDATR.A<br>R.LASDGGVPPAAGTDPAGEPHAIAAK.V<br>K.VMCLDFLGR.V<br>K.TMTIIAVGSGKGVGK.S<br>K.TMTIIAVGSGK.G<br>K.TIHGAPVATLADVEPPAEIVDIR.N<br>R.NSDAAGAADDVAIHGAK.A<br>R.VAAEVGPIDIVVNNAGITR.D<br>K.LQEQQGATVANYAGNDEK.A<br>R.IVWINGSINGAQGVQVNYAAK.S<br>R.LGQHEIAR.G<br>K.LQEQQGATVANYAGNDEKAR.A<br>R.GIGEASLKL.L<br>R.MSYEDWDDVMR.V<br>K.GVTVNIAIAPGYIDTDMVAAPPQVLEK.I<br>K.KGYVTNIAIAPGYIDTDMVAAPPQVLEK.I<br>K.SGHGFTK.A<br>R.VNLGGCFNMAK.A<br>R.VNLGGCFNMAK.A<br>R.MSYEDWDDVMR.V<br>R.GVAFLCSEDAAGITGSTMINGGQHMY.<br>K.WDVGDHQAQLDGCAR.V<br>K.TYKWDVGDHQAQLDGCAR.V<br>K.ALAQEGAK.K<br>R.MSYEDWDDVMR.V<br>R.GVAFLCSEDAAGITGSTMINGGQHMY.<br>R.GVAFLCSEDAAGITGSTMINGGQHMY.<br>R.IAPGAIPADALCQR.R<br>R.LGDEGLPVVNPVPLR.W<br>R.LGTEEVVIPAISGGDGTHR.I<br>R.VWTDPGDLAGHDVLP.LFAWGYQR.N<br>R.NVAAYWGLLDR.L<br>R.KAALTAAGLIVEQR.V<br>K.LALQDAIEASLDPPDPALAR.D<br>R.TNAFAPAAEALAK.I<br>R.LLDAIEAALR.D<br>R.AENDANQLVLTNQTDPGAIWLR.A<br>K.IAAAYLSALEGSALPGEGLDRAALAEASR.F<br>K.AVGEGANLGVTAAR.I<br>R.SLSITDNLVGGK.V<br>R.DAEGHLQEAQTDI.R.E<br>R.AEALDAEIQAGFAGIK.S<br>R.GFWLGDFAFASGSK.G<br>K.IAAAYLSALEGSALPGEGLDRAALAEASR.F<br>R.SPGGEGDDRRPIVHDFTLR.L<br>R.LEGEGAEILR.W<br>R.GLTRPELAVLSTAK.L<br>K.AASQNAEVDGPANDVLR.V<br>R.LNASVDGLLSPVLR.R<br>R.KVEGLAANDELLR.C<br>K.TLSDTPETDTPPTPVK.I<br>R.LAFGLGPK.G<br>K.AASQNAEVDGPANDVLRVDAEDLR.V<br>R.LSQDDRDRALLR.M<br>R.LRDLDAANPR.S<br>R.LPVNDEMALTPTTATIEK.A<br>R.HIFLDPDPDAK.S<br>K.TDGAIGVDLAER.R<br>R.LFHAVIGATLR.T<br>R.HAPTTAALIER.F<br>R.LLGMPIWSELDAK.I<br>R.GWQPEVEAALAR.R<br>K.FGFPAGHAGK.A<br>K.AIAAVLDGR.A<br>K.AGVIGWTHMLEDGGALLR.Y<br>R.VLLDLIVPEIK.G<br>R.SSWDDYDKK.L<br>R.SGGVVDTPGALNAQLEQMVR.G<br>R.LSLFSQAAAAAMASQADLLR.V<br>R.DFAGAIADHQLR.R<br>K.VVHPAEVLR.D<br>K.IDSAQIPGLPKPLWR.E<br>R.VTQSLSRPGPVAR.L<br>R.QGGSAYGMDTVSALR.H<br>R.DGADPYFVVAADK.G<br>R.AAGRPSLLEPIAAEGPDR.R<br>K.GGSAAPVSLVR.I<br>R.RLLDAIEAALR.D<br>R.QWEMLTQQLDAGAPEALTAAVVR.L<br>R.NLYNPEEAAR.D<br>R.LQALALSIAEK.G |
| YP_617291 | Sala_2249 | HflK protein                               | 61.66%            | 24                      | R.APELFFFQIANPEDITR.E<br>R.DQSIVDLAYER.W<br>R.AYQQQLER.A<br>R.ARGDTSAFDQIYEYR.L<br>K.AIDENFVLR.D<br>R.GGTGGGSGGGGDFADSGR.I<br>R.ATVANFDLVQAIQPGR.V<br>R.AGVTIQIAIR.Q<br>R.GDTSAFDQIYEYR.L<br>R.NPWVTPDPADQR.R<br>R.LYETHEAVLSNVDK.T<br>R.GPSALDELR.K<br>R.NPWVTPDPADQRR.G<br>R.MQALLDEYR.A<br>R.GVTPYLPNEVQR.R<br>R.VEIEAQVSR.M<br>R.LYETHEAVLSNVDKTIVEAR.G<br>R.QADPPSQVDEAFK.E<br>R.QADPPSQVDEAFKVTAR.Q<br>R.GPSALDELR.K<br>R.APELFFFQIANPEDITREVAESAMR.A<br>K.GEDDDGKGGDGK.R<br>R.QEREAANLAR.A<br>R.MQALLDEYR.A<br>K.VGLVDADIVGPSQPR.L<br>R.LMASEDKPEAR.G<br>R.AGLLEQGV.R.E<br>K.HKPGAVIVSTPQDLALMDATR.A<br>R.LASDGGVPPAAGTDPAGEPHAIAAK.V<br>K.VMCLDFLGR.V<br>K.TMTIIAVGSGKGVGK.S<br>K.TMTIIAVGSGK.G<br>K.TIHGAPVATLADVEPPAEIVDIR.N<br>R.NSDAAGAADDVAIHGAK.A<br>R.VAAEVGPIDIVVNNAGITR.D<br>K.LQEQQGATVANYAGNDEK.A<br>R.IVWINGSINGAQGVQVNYAAK.S<br>R.LGQHEIAR.G<br>K.LQEQQGATVANYAGNDEKAR.A<br>R.GIGEASLKL.L<br>R.MSYEDWDDVMR.V<br>K.GVTVNIAIAPGYIDTDMVAAPPQVLEK.I<br>K.KGYVTNIAIAPGYIDTDMVAAPPQVLEK.I<br>K.SGHGFTK.A<br>R.VNLGGCFNMAK.A<br>R.VNLGGCFNMAK.A<br>R.MSYEDWDDVMR.V<br>R.GVAFLCSEDAAGITGSTMINGGQHMY.<br>K.WDVGDHQAQLDGCAR.V<br>K.TYKWDVGDHQAQLDGCAR.V<br>K.ALAQEGAK.K<br>R.MSYEDWDDVMR.V<br>R.GVAFLCSEDAAGITGSTMINGGQHMY.<br>R.GVAFLCSEDAAGITGSTMINGGQHMY.<br>R.IAPGAIPADALCQR.R<br>R.LGDEGLPVVNPVPLR.W<br>R.LGTEEVVIPAISGGDGTHR.I<br>R.VWTDPGDLAGHDVLP.LFAWGYQR.N<br>R.NVAAYWGLLDR.L<br>R.KAALTAAGLIVEQR.V<br>K.LALQDAIEASLDPPDPALAR.D<br>R.TNAFAPAAEALAK.I<br>R.LLDAIEAALR.D<br>R.AENDANQLVLTNQTDPGAIWLR.A<br>K.IAAAYLSALEGSALPGEGLDRAALAEASR.F<br>K.AVGEGANLGVTAAR.I<br>R.SLSITDNLVGGK.V<br>R.DAEGHLQEAQTDI.R.E<br>R.AEALDAEIQAGFAGIK.S<br>R.GFWLGDFAFASGSK.G<br>K.IAAAYLSALEGSALPGEGLDRAALAEASR.F<br>R.SPGGEGDDRRPIVHDFTLR.L<br>R.LEGEGAEILR.W<br>R.GLTRPELAVLSTAK.L<br>K.AASQNAEVDGPANDVLR.V<br>R.LNASVDGLLSPVLR.R<br>R.KVEGLAANDELLR.C<br>K.TLSDTPETDTPPTPVK.I<br>R.LAFGLGPK.G<br>K.AASQNAEVDGPANDVLRVDAEDLR.V<br>R.LSQDDRDRALLR.M<br>R.LRDLDAANPR.S<br>R.LPVNDEMALTPTTATIEK.A<br>R.HIFLDPDPDAK.S<br>K.TDGAIGVDLAER.R<br>R.LFHAVIGATLR.T<br>R.HAPTTAALIER.F<br>R.LLGMPIWSELDAK.I<br>R.GWQPEVEAALAR.R<br>K.FGFPAGHAGK.A<br>K.AIAAVLDGR.A<br>K.AGVIGWTHMLEDGGALLR.Y<br>R.VLLDLIVPEIK.G<br>R.SSWDDYDKK.L<br>R.SGGVVDTPGALNAQLEQMVR.G<br>R.LSLFSQAAAAAMASQADLLR.V<br>R.DFAGAIADHQLR.R<br>K.VVHPAEVLR.D<br>K.IDSAQIPGLPKPLWR.E<br>R.VTQSLSRPGPVAR.L<br>R.QGGSAYGMDTVSALR.H<br>R.DGADPYFVVAADK.G<br>R.AAGRPSLLEPIAAEGPDR.R<br>K.GGSAAPVSLVR.I<br>R.RLLDAIEAALR.D<br>R.QWEMLTQQLDAGAPEALTAAVVR.L<br>R.NLYNPEEAAR.D<br>R.LQALALSIAEK.G                                                                                                                                                                                                                                                                                                                                                                                                                                                                                                                                                                                                                                                        |
| YP_617292 | Sala_2250 | ATPase involved in chromosome partitioning | 32.45%            | 8                       | K.VGLVDADIVGPSQPR.L<br>R.LMASEDKPEAR.G<br>R.AGLLEQGV.R.E<br>K.HKPGAVIVSTPQDLALMDATR.A<br>R.LASDGGVPPAAGTDPAGEPHAIAAK.V<br>K.VMCLDFLGR.V<br>K.TMTIIAVGSGKGVGK.S<br>K.TMTIIAVGSGK.G<br>K.TIHGAPVATLADVEPPAEIVDIR.N<br>R.NSDAAGAADDVAIHGAK.A<br>R.VAAEVGPIDIVVNNAGITR.D<br>K.LQEQQGATVANYAGNDEK.A<br>R.IVWINGSINGAQGVQVNYAAK.S<br>R.LGQHEIAR.G<br>K.LQEQQGATVANYAGNDEKAR.A<br>R.GIGEASLKL.L<br>R.MSYEDWDDVMR.V<br>K.GVTVNIAIAPGYIDTDMVAAPPQVLEK.I<br>K.KGYVTNIAIAPGYIDTDMVAAPPQVLEK.I<br>K.SGHGFTK.A<br>R.VNLGGCFNMAK.A<br>R.VNLGGCFNMAK.A<br>R.MSYEDWDDVMR.V<br>R.GVAFLCSEDAAGITGSTMINGGQHMY.<br>K.WDVGDHQAQLDGCAR.V<br>K.TYKWDVGDHQAQLDGCAR.V<br>K.ALAQEGAK.K<br>R.MSYEDWDDVMR.V<br>R.GVAFLCSEDAAGITGSTMINGGQHMY.<br>R.GVAFLCSEDAAGITGSTMINGGQHMY.<br>R.IAPGAIPADALCQR.R<br>R.LGDEGLPVVNPVPLR.W<br>R.LGTEEVVIPAISGGDGTHR.I<br>R.VWTDPGDLAGHDVLP.LFAWGYQR.N<br>R.NVAAYWGLLDR.L<br>R.KAALTAAGLIVEQR.V<br>K.LALQDAIEASLDPPDPALAR.D<br>R.TNAFAPAAEALAK.I<br>R.LLDAIEAALR.D<br>R.AENDANQLVLTNQTDPGAIWLR.A<br>K.IAAAYLSALEGSALPGEGLDRAALAEASR.F<br>K.AVGEGANLGVTAAR.I<br>R.SLSITDNLVGGK.V<br>R.DAEGHLQEAQTDI.R.E<br>R.AEALDAEIQAGFAGIK.S<br>R.GFWLGDFAFASGSK.G<br>K.IAAAYLSALEGSALPGEGLDRAALAEASR.F<br>R.SPGGEGDDRRPIVHDFTLR.L<br>R.LEGEGAEILR.W<br>R.GLTRPELAVLSTAK.L<br>K.AASQNAEVDGPANDVLR.V<br>R.LNASVDGLLSPVLR.R<br>R.KVEGLAANDELLR.C<br>K.TLSDTPETDTPPTPVK.I<br>R.LAFGLGPK.G<br>K.AASQNAEVDGPANDVLRVDAEDLR.V<br>R.LSQDDRDRALLR.M<br>R.LRDLDAANPR.S<br>R.LPVNDEMALTPTTATIEK.A<br>R.HIFLDPDPDAK.S<br>K.TDGAIGVDLAER.R<br>R.LFHAVIGATLR.T<br>R.HAPTTAALIER.F<br>R.LLGMPIWSELDAK.I<br>R.GWQPEVEAALAR.R<br>K.FGFPAGHAGK.A<br>K.AIAAVLDGR.A<br>K.AGVIGWTHMLEDGGALLR.Y<br>R.VLLDLIVPEIK.G<br>R.SSWDDYDKK.L<br>R.SGGVVDTPGALNAQLEQMVR.G<br>R.LSLFSQAAAAAMASQADLLR.V<br>R.DFAGAIADHQLR.R<br>K.VVHPAEVLR.D<br>K.IDSAQIPGLPKPLWR.E<br>R.VTQSLSRPGPVAR.L<br>R.QGGSAYGMDTVSALR.H<br>R.DGADPYFVVAADK.G<br>R.AAGRPSLLEPIAAEGPDR.R<br>K.GGSAAPVSLVR.I<br>R.RLLDAIEAALR.D<br>R.QWEMLTQQLDAGAPEALTAAVVR.L<br>R.NLYNPEEAAR.D<br>R.LQALALSIAEK.G                                                                                                                                                                                                                                                                                                                                                                                                                                                                                                                                                                                                                                                                                                                                                                                                                                                                                                                                                                                                                                                                                                                                                                              |
| YP_617293 | Sala_2251 | CoA-binding                                | 30.71%            | 2                       | K.TIHGAPVATLADVEPPAEIVDIR.N<br>R.NSDAAGAADDVAIHGAK.A<br>R.VAAEVGPIDIVVNNAGITR.D<br>K.LQEQQGATVANYAGNDEK.A<br>R.IVWINGSINGAQGVQVNYAAK.S<br>R.LGQHEIAR.G<br>K.LQEQQGATVANYAGNDEKAR.A<br>R.GIGEASLKL.L<br>R.MSYEDWDDVMR.V<br>K.GVTVNIAIAPGYIDTDMVAAPPQVLEK.I<br>K.KGYVTNIAIAPGYIDTDMVAAPPQVLEK.I<br>K.SGHGFTK.A<br>R.VNLGGCFNMAK.A<br>R.VNLGGCFNMAK.A<br>R.MSYEDWDDVMR.V<br>R.GVAFLCSEDAAGITGSTMINGGQHMY.<br>K.WDVGDHQAQLDGCAR.V<br>K.TYKWDVGDHQAQLDGCAR.V<br>K.ALAQEGAK.K<br>R.MSYEDWDDVMR.V<br>R.GVAFLCSEDAAGITGSTMINGGQHMY.<br>R.GVAFLCSEDAAGITGSTMINGGQHMY.<br>R.IAPGAIPADALCQR.R<br>R.LGDEGLPVVNPVPLR.W<br>R.LGTEEVVIPAISGGDGTHR.I<br>R.VWTDPGDLAGHDVLP.LFAWGYQR.N<br>R.NVAAYWGLLDR.L<br>R.KAALTAAGLIVEQR.V<br>K.LALQDAIEASLDPPDPALAR.D<br>R.TNAFAPAAEALAK.I<br>R.LLDAIEAALR.D<br>R.AENDANQLVLTNQTDPGAIWLR.A<br>K.IAAAYLSALEGSALPGEGLDRAALAEASR.F<br>K.AVGEGANLGVTAAR.I<br>R.SLSITDNLVGGK.V<br>R.DAEGHLQEAQTDI.R.E<br>R.AEALDAEIQAGFAGIK.S<br>R.GFWLGDFAFASGSK.G<br>K.IAAAYLSALEGSALPGEGLDRAALAEASR.F<br>R.SPGGEGDDRRPIVHDFTLR.L<br>R.LEGEGAEILR.W<br>R.GLTRPELAVLSTAK.L<br>K.AASQNAEVDGPANDVLR.V<br>R.LNASVDGLLSPVLR.R<br>R.KVEGLAANDELLR.C<br>K.TLSDTPETDTPPTPVK.I<br>R.LAFGLGPK.G<br>K.AASQNAEVDGPANDVLRVDAEDLR.V<br>R.LSQDDRDRALLR.M<br>R.LRDLDAANPR.S<br>R.LPVNDEMALTPTTATIEK.A<br>R.HIFLDPDPDAK.S<br>K.TDGAIGVDLAER.R<br>R.LFHAVIGATLR.T<br>R.HAPTTAALIER.F<br>R.LLGMPIWSELDAK.I<br>R.GWQPEVEAALAR.R<br>K.FGFPAGHAGK.A<br>K.AIAAVLDGR.A<br>K.AGVIGWTHMLEDGGALLR.Y<br>R.VLLDLIVPEIK.G<br>R.SSWDDYDKK.L<br>R.SGGVVDTPGALNAQLEQMVR.G<br>R.LSLFSQAAAAAMASQADLLR.V<br>R.DFAGAIADHQLR.R<br>K.VVHPAEVLR.D<br>K.IDSAQIPGLPKPLWR.E<br>R.VTQSLSRPGPVAR.L<br>R.QGGSAYGMDTVSALR.H<br>R.DGADPYFVVAADK.G<br>R.AAGRPSLLEPIAAEGPDR.R<br>K.GGSAAPVSLVR.I<br>R.RLLDAIEAALR.D<br>R.QWEMLTQQLDAGAPEALTAAVVR.L<br>R.NLYNPEEAAR.D<br>R.LQALALSIAEK.G                                                                                                                                                                                                                                                                                                                                                                                                                                                                                                                                                                                                                                                                                                                                                                                                                                                                                                                                                                                                                                                                                                                                                                                                                                                                                                                                                                   |
| YP_617297 | Sala_2255 | Acetoacetyl-CoA reductase                  | 79.58%            | 20                      | K.LQEQQGATVANYAGNDEKAR.A<br>R.GIGEASLKL.L<br>R.MSYEDWDDVMR.V<br>K.GVTVNIAIAPGYIDTDMVAAPPQVLEK.I<br>K.KGYVTNIAIAPGYIDTDMVAAPPQVLEK.I<br>K.SGHGFTK.A<br>R.VNLGGCFNMAK.A<br>R.VNLGGCFNMAK.A<br>R.MSYEDWDDVMR.V<br>R.GVAFLCSEDAAGITGSTMINGGQHMY.<br>K.WDVGDHQAQLDGCAR.V<br>K.TYKWDVGDHQAQLDGCAR.V<br>K.ALAQEGAK.K<br>R.MSYEDWDDVMR.V<br>R.GVAFLCSEDAAGITGSTMINGGQHMY.<br>R.GVAFLCSEDAAGITGSTMINGGQHMY.<br>R.IAPGAIPADALCQR.R<br>R.LGDEGLPVVNPVPLR.W<br>R.LGTEEVVIPAISGGDGTHR.I<br>R.VWTDPGDLAGHDVLP.LFAWGYQR.N<br>R.NVAAYWGLLDR.L<br>R.KAALTAAGLIVEQR.V<br>K.LALQDAIEASLDPPDPALAR.D<br>R.TNAFAPAAEALAK.I<br>R.LLDAIEAALR.D<br>R.AENDANQLVLTNQTDPGAIWLR.A<br>K.IAAAYLSALEGSALPGEGLDRAALAEASR.F<br>K.AVGEGANLGVTAAR.I<br>R.SLSITDNLVGGK.V<br>R.DAEGHLQEAQTDI.R.E<br>R.AEALDAEIQAGFAGIK.S<br>R.GFWLGDFAFASGSK.G<br>K.IAAAYLSALEGSALPGEGLDRAALAEASR.F<br>R.SPGGEGDDRRPIVHDFTLR.L<br>R.LEGEGAEILR.W<br>R.GLTRPELAVLSTAK.L<br>K.AASQNAEVDGPANDVLR.V<br>R.LNASVDGLLSPVLR.R<br>R.KVEGLAANDELLR.C<br>K.TLSDTPETDTPPTPVK.I<br>R.LAFGLGPK.G<br>K.AASQNAEVDGPANDVLRVDAEDLR.V<br>R.LSQDDRDRALLR.M<br>R.LRDLDAANPR.S<br>R.LPVNDEMALTPTTATIEK.A<br>R.HIFLDPDPDAK.S<br>K.TDGAIGVDLAER.R<br>R.LFHAVIGATLR.T<br>R.HAPTTAALIER.F<br>R.LLGMPIWSELDAK.I<br>R.GWQPEVEAALAR.R<br>K.FGFPAGHAGK.A<br>K.AIAAVLDGR.A<br>K.AGVIGWTHMLEDGGALLR.Y<br>R.VLLDLIVPEIK.G<br>R.SSWDDYDKK.L<br>R.SGGVVDTPGALNAQLEQMVR.G<br>R.LSLFSQAAAAAMASQADLLR.V<br>R.DFAGAIADHQLR.R<br>K.VVHPAEVLR.D<br>K.IDSAQIPGLPKPLWR.E<br>R.VTQSLSRPGPVAR.L<br>R.QGGSAYGMDTVSALR.H<br>R.DGADPYFVVAADK.G<br>R.AAGRPSLLEPIAAEGPDR.R<br>K.GGSAAPVSLVR.I<br>R.RLLDAIEAALR.D<br>R.QWEMLTQQLDAGAPEALTAAVVR.L<br>R.NLYNPEEAAR.D<br>R.LQALALSIAEK.G                                                                                                                                                                                                                                                                                                                                                                                                                                                                                                                                                                                                                                                                                                                                                                                                                                                                                                                                                                                                                                                                                                                                                                                                                                                                                                                                                                                                                                                                                                                             |
| YP_617299 | Sala_2257 | hypothetical protein                       | 35.79%            | 6                       | R.LGTEEVVIPAISGGDGTHR.I<br>R.VWTDPGDLAGHDVLP.LFAWGYQR.N<br>R.NVAAYWGLLDR.L<br>R.KAALTAAGLIVEQR.V<br>K.LALQDAIEASLDPPDPALAR.D<br>R.TNAFAPAAEALAK.I<br>R.LLDAIEAALR.D<br>R.AENDANQLVLTNQTDPGAIWLR.A<br>K.IAAAYLSALEGSALPGEGLDRAALAEASR.F<br>K.AVGEGANLGVTAAR.I<br>R.SLSITDNLVGGK.V<br>R.DAEGHLQEAQTDI.R.E<br>R.AEALDAEIQAGFAGIK.S<br>R.GFWLGDFAFASGSK.G<br>K.IAAAYLSALEGSALPGEGLDRAALAEASR.F<br>R.SPGGEGDDRRPIVHDFTLR.L<br>R.LEGEGAEILR.W<br>R.GLTRPELAVLSTAK.L<br>K.AASQNAEVDGPANDVLR.V<br>R.LNASVDGLLSPVLR.R<br>R.KVEGLAANDELLR.C<br>K.TLSDTPETDTPPTPVK.I<br>R.LAFGLGPK.G<br>K.AASQNAEVDGPANDVLRVDAEDLR.V<br>R.LSQDDRDRALLR.M<br>R.LRDLDAANPR.S<br>R.LPVNDEMALTPTTATIEK.A<br>R.HIFLDPDPDAK.S<br>K.TDGAIGVDLAER.R<br>R.LFHAVIGATLR.T<br>R.HAPTTAALIER.F<br>R.LLGMPIWSELDAK.I<br>R.GWQPEVEAALAR.R<br>K.FGFPAGHAGK.A<br>K.AIAAVLDGR.A<br>K.AGVIGWTHMLEDGGALLR.Y<br>R.VLLDLIVPEIK.G<br>R.SSWDDYDKK.L<br>R.SGGVVDTPGALNAQLEQMVR.G<br>R.LSLFSQAAAAAMASQADLLR.V<br>R.DFAGAIADHQLR.R<br>K.VVHPAEVLR.D<br>K.IDSAQIPGLPKPLWR.E<br>R.VTQSLSRPGPVAR.L<br>R.QGGSAYGMDTVSALR.H<br>R.DGADPYFVVAADK.G<br>R.AAGRPSLLEPIAAEGPDR.R<br>K.GGSAAPVSLVR.I<br>R.RLLDAIEAALR.D<br>R.QWEMLTQQLDAGAPEALTAAVVR.L<br>R.NLYNPEEAAR.D<br>R.LQALALSIAEK.G                                                                                                                                                                                                                                                                                                                                                                                                                                                                                                                                                                                                                                                                                                                                                                                                                                                                                                                                                                                                                                                                                                                                                                                                                                                                                                                                                                                                                                                                                                                                                                                                                                                                                                                                                                                                                                                                                                                                                                                |
| YP_617300 | Sala_2258 | NAD-glutamate dehydrogenase                | 50.45%            | 62                      | R.LGTEEVVIPAISGGDGTHR.I<br>R.VWTDPGDLAGHDVLP.LFAWGYQR.N<br>R.NVAAYWGLLDR.L<br>R.KAALTAAGLIVEQR.V<br>K.LALQDAIEASLDPPDPALAR.D<br>R.TNAFAPAAEALAK.I<br>R.LLDAIEAALR.D<br>R.AENDANQLVLTNQTDPGAIWLR.A<br>K.IAAAYLSALEGSALPGEGLDRAALAEASR.F<br>K.AVGEGANLGVTAAR.I<br>R.SLSITDNLVGGK.V<br>R.DAEGHLQEAQTDI.R.E<br>R.AEALDAEIQAGFAGIK.S<br>R.GFWLGDFAFASGSK.G<br>K.IAAAYLSALEGSALPGEGLDRAALAEASR.F<br>R.SPGGEGDDRRPIVHDFTLR.L<br>R.LEGEGAEILR.W<br>R.GLTRPELAVLSTAK.L<br>K.AASQNAEVDGPANDVLR.V<br>R.LNASVDGLLSPVLR.R<br>R.KVEGLAANDELLR.C<br>K.TLSDTPETDTPPTPVK.I<br>R.LAFGLGPK.G<br>K.AASQNAEVDGPANDVLRVDAEDLR.V<br>R.LSQDDRDRALLR.M<br>R.LRDLDAANPR.S<br>R.LPVNDEMALTPTTATIEK.A<br>R.HIFLDPDPDAK.S<br>K.TDGAIGVDLAER.R<br>R.LFHAVIGATLR.T<br>R.HAPTTAALIER.F<br>R.LLGMPIWSELDAK.I<br>R.GWQPEVEAALAR.R<br>K.FGFPAGHAGK.A<br>K.AIAAVLDGR.A<br>K.AGVIGWTHMLEDGGALLR.Y<br>R.VLLDLIVPEIK.G<br>R.SSWDDYDKK.L<br>R.SGGVVDTPGALNAQLEQMVR.G<br>R.LSLFSQAAAAAMASQADLLR.V<br>R.DFAGAIADHQLR.R<br>K.VVHPAEVLR.D<br>K.IDSAQIPGLPKPLWR.E<br>R.VTQSLSRPGPVAR.L<br>R.QGGSAYGMDTVSALR.H<br>R.DGADPYFVVAADK.G<br>R.AAGRPSLLEPIAAEGPDR.R<br>K.GGSAAPVSLVR.I<br>R.RLLDAIEAALR.D<br>R.QWEMLTQQLDAGAPEALTAAVVR.L<br>R.NLYNPEEAAR.D<br>R.LQALALSIAEK.G                                                                                                                                                                                                                                                                                                                                                                                                                                                                                                                                                                                                                                                                                                                                                                                                                                                                                                                                                                                                                                                                                                                                                                                                                                                                                                                                                                                                                                                                                                                                                                                                                                                                                                                                                                                                                                                                                                                                                                                |

| Accession | Locus tag | Description                                             | Sequence coverage | No. peptides identified | List of peptides identified                                                                                                                                                                                                                                                                                                                                                                                                                                                                                                                                                                                                                                                                                                                                                                                                                                                                                                                                                                                                                                                                                                                                                                                                                                                                                                                                                                                                                                                                                                                                                                                                                                                                                                                                                                                                                                                                                                                                                                                                                                                                                                                                                                                                                                                                                                                                                                                                                                                                                                                                                                                                                                                                                                                                                                                                                                                                                                                                                                                                                                     |
|-----------|-----------|---------------------------------------------------------|-------------------|-------------------------|-----------------------------------------------------------------------------------------------------------------------------------------------------------------------------------------------------------------------------------------------------------------------------------------------------------------------------------------------------------------------------------------------------------------------------------------------------------------------------------------------------------------------------------------------------------------------------------------------------------------------------------------------------------------------------------------------------------------------------------------------------------------------------------------------------------------------------------------------------------------------------------------------------------------------------------------------------------------------------------------------------------------------------------------------------------------------------------------------------------------------------------------------------------------------------------------------------------------------------------------------------------------------------------------------------------------------------------------------------------------------------------------------------------------------------------------------------------------------------------------------------------------------------------------------------------------------------------------------------------------------------------------------------------------------------------------------------------------------------------------------------------------------------------------------------------------------------------------------------------------------------------------------------------------------------------------------------------------------------------------------------------------------------------------------------------------------------------------------------------------------------------------------------------------------------------------------------------------------------------------------------------------------------------------------------------------------------------------------------------------------------------------------------------------------------------------------------------------------------------------------------------------------------------------------------------------------------------------------------------------------------------------------------------------------------------------------------------------------------------------------------------------------------------------------------------------------------------------------------------------------------------------------------------------------------------------------------------------------------------------------------------------------------------------------------------------|
|           |           |                                                         |                   |                         | R.DGADPYFVVAADKGTATFSDVANGLAMER.G<br>R.DGADPYFVVAADKGTATFSDVANGLAMER.G<br>R.AAGRPSLLEPAEAGPDRR.M<br>K.AALDVSLEDDAWFAEETCYR.I<br>R.RQWEMLTQQLLDAGAPEALTAAVR.L<br>R.RQWEMLTQQLLDAGAPEALTAAVR.L<br>R.QWEMLTQQLLDAGAPEALTAAVR.L<br>R.MTDDVSALVEDNRLQALALSIAEK.G<br>R.LVINDDMPFLVDSTSQVVAAGLVVHR.I<br>R.LIMTFEGSGR.L<br>R.IAIEAMLVR.E<br>R.HFAEMGIDVQSDTR.V<br>R.AAMLADAAMR.L<br>R.AALAEASR.F                                                                                                                                                                                                                                                                                                                                                                                                                                                                                                                                                                                                                                                                                                                                                                                                                                                                                                                                                                                                                                                                                                                                                                                                                                                                                                                                                                                                                                                                                                                                                                                                                                                                                                                                                                                                                                                                                                                                                                                                                                                                                                                                                                                                                                                                                                                                                                                                                                                                                                                                                                                                                                                                        |
| YP_617302 | Sala_2260 | transcriptional regulator, TetR family                  | 20.56%            | 2                       | R.EKLDYIQAALLAAPTAR.G<br>K.GYEGSMADLTFEANGITKPSLYAAGFNK.E<br>R.WIEGPLAAGAPDAAPYDR.I<br>R.IIIDGAEIVLPAALAAQLAEGGR.I<br>R.SFADMDVAPLPGFAAPTGRF.F<br>R.TNDVTPAVVAAMGAVPR.E<br>R.EAHVPAALAGVAYMDR.A<br>R.VLLVGATGYTAAALAAQGVHAAVEEPALLAAR.S<br>R.FSEYTAEMR.A<br>R.SFADMDVAPLPGFAAPTGRF.F<br>R.SFADMDVAPLPGFAAPTGRF.F<br>R.EAHVPAALAGVAYMDR.A<br>R.AAMIDSQLR.T<br>R.QAVGANALSLGVR.A<br>R.TNLQATSDRFEIGDLTR.T<br>R.SSQALEQYVEVER.G<br>R.AADENVPIEK.S<br>K.AYENPTLTGAR.A<br>R.LALAEGLDR.T<br>R.SILDILNAEQEYLNQVQLVSAQR.N<br>R.GLPEVGTQASYEENLIIPGNFNSPAR.S<br>R.GAYAAWQANER.I<br>R.ATEASIFSQVVGAYMDVIR.D<br>R.DQAIQLNQN.K<br>R.VKGQLWDWADDPAPQVATDTR.A<br>R.TAEANLIASR.E<br>R.NSVYAFSLAAMG.A<br>R.DLGIIEGALYDPEVNYR.R<br>R.ATEASIFSQVVGAYMDVIRDAIVQLNQN.K<br>K.YRVEAGQANLR.A<br>K.GQLWDWADDPAPQVATDTR.A<br>R.VEAGQANLR.A<br>R.LIVPIMQGGAVR.N<br>R.DLGIIEGALYDPEVNYR.V<br>R.AVPPADAALIEGPPAPTQ.<br>R.VIARDEAPGAAR.E<br>K.EWLDANLPALEAMVAK.E<br>R.LPILLSIEEALYGGAR.S<br>R.TNEAFAAALADPRR.A<br>R.APILLGIDEAGAPR.F<br>R.VDPVIMLAEGDR.V<br>R.ATCLALDGFVPGEGGLR.W<br>R.TVTTSPIGAYVGNPAK.L<br>R.VGGPSAFDNDHQIFAAPFTFIAR.V<br>K.SSWIFGSSVAQR.A<br>R.NLVRDPIQDITALLAR.V<br>R.VTGTSPFFINGQR.A<br>R.TQYIDPGLVR.F<br>R.IAADTGLAALMR.A<br>R.ADVVAWPALK.S<br>R.AADRVRTGTPSFFINGQR.A<br>K.TWIDQFYQQR.G<br>K.LTFPMLHPIDAIAGAIK.C<br>K.YQTGTPTFVINGQVAEGIAAWGPLR.D<br>K.VENVEAVEK.G<br>K.YQTGTPTFVINGQVAEGIAAWGPLRDR.L<br>R.FFPADATFLEHDAFIAGASKPQPGIEAAMQLPPAQR.F<br>K.VENVEAVEKTMAGIEK.Y<br>R.FFPADATFLEHDAFIAGASK.P<br>R.VDGDVGMGNPEAPIK.L<br>K.DSHEELKR.D<br>R.GVPATTIQCLGK.V<br>K.LTFPMLHPIDAIAGAIK.C<br>R.GVPATTIQCLGKVENVEAVEK.G<br>K.EQEVIAK.V<br>R.AALAAEQAADR.A<br>R.AADQAQALDR.H<br>R.AALALDGEATTLER.A<br>K.AAALTEAAAAAR.K<br>R.AQPYEAALAAALGDDLDAGTDPAAAR.S<br>K.AALADANFAAQR.L<br>R.LRDAEVALAQR.L<br>R.LGPNLVAADLAELDAER.E<br>R.AAAEAQASLR.E<br>K.VAAEAQER.A<br>K.AAQDELETKA.A<br>R.RLAQVAEAETDGGQPLAVGQR.L<br>R.RDALAEATATQLR.L<br>R.LAEQRAAAEAQASLR.E<br>R.KALADADAAR.R<br>R.FCDLDRMARETNR.Y<br>R.EAHAALTALDAETK.S<br>R.DAALLARR.L<br>R.AKQVALIFADAATGAHSPALVSQK.I<br>R.FGVVPSSTANVQILLAK.N<br>R.LILPEIAFPR.A<br>R.VTTYDTVQTYTFR.T<br>R.NITSDTSSNGR.W<br>K.NPAWLADTVLFSR.T<br>R.LLSPTGLFADENATAPDRPISR.H<br>K.DATMDFDITLADVGDGR.L<br>R.VGGTSDSLR.D<br>R.ATFNTYVQSLQPLGGTYHDAGMWWGAR.L<br>K.TDVFBNKYTYEDR.V<br>R.HPYAPSSSDPMTVNFVNSDGR.N<br>K.YGATILFSSR.A<br>R.ATTPFDADDTAPSDALDMDIDLVPDADADTQWR.I<br>R.ARHPQYAPSSDPMVNFVNSDGR.N<br>R.AMGGASYDEAAQAEANK.M<br>R.LFIDQPLGAGSAPVIDGAAHYLLGVMR.L<br>R.TALPAEAEPVLRQLK.A<br>R.SGEWLAVVADAAR.R<br>R.LAAPAPAALITPEGGFTDR.E<br>K.AGDPVLLFDRN.S<br>K.TSSIVSDPVGGATNPK.A<br>K.AIPGATMRYCILVYNGSGTATAINIADALPAR.T<br>R.DGYIDRAGQGRF.D<br>R.VLDIAAAGLAAR.G<br>R.TGMLPFVFDGFGYDR.Y<br>K.GWSIAEQALR.D<br>R.LSDWTDHLSTAFPEVR.L<br>R.TASDRHDPVIEHR.D<br>R.SPANDLDRYEDAWGHDLRS.I<br>R.VSUALQPLATLAFSSPTEGRPNGLYSR.S<br>R.SHIWTDTPAR.T<br>R.GYFGLPVLASATPALESIAQVEAGR.Y<br>R.VPQSEAPLGSVVIAPLGR.R<br>R.VLLLTALGLDLYR.V<br>R.ELAKLADVSEAVIR.G<br>R.ADTMFIYSESSER.S<br>K.VVAFDPHDDQGER.I<br>R.QPIILANNTDPPDPVLYAYDSFLR.Q<br>R.AFALGPESADAR.I |
| YP_617303 | Sala_2261 | protein-L-isoaspartate(D-aspartate) O-methyltransferase | 68.64%            | 11                      |                                                                                                                                                                                                                                                                                                                                                                                                                                                                                                                                                                                                                                                                                                                                                                                                                                                                                                                                                                                                                                                                                                                                                                                                                                                                                                                                                                                                                                                                                                                                                                                                                                                                                                                                                                                                                                                                                                                                                                                                                                                                                                                                                                                                                                                                                                                                                                                                                                                                                                                                                                                                                                                                                                                                                                                                                                                                                                                                                                                                                                                                 |
| YP_617304 | Sala_2262 | Type I secretion outer membrane protein, TolC           | 54.93%            | 22                      |                                                                                                                                                                                                                                                                                                                                                                                                                                                                                                                                                                                                                                                                                                                                                                                                                                                                                                                                                                                                                                                                                                                                                                                                                                                                                                                                                                                                                                                                                                                                                                                                                                                                                                                                                                                                                                                                                                                                                                                                                                                                                                                                                                                                                                                                                                                                                                                                                                                                                                                                                                                                                                                                                                                                                                                                                                                                                                                                                                                                                                                                 |
| YP_617305 | Sala_2263 | hypothetical protein                                    | 20.57%            | 2                       |                                                                                                                                                                                                                                                                                                                                                                                                                                                                                                                                                                                                                                                                                                                                                                                                                                                                                                                                                                                                                                                                                                                                                                                                                                                                                                                                                                                                                                                                                                                                                                                                                                                                                                                                                                                                                                                                                                                                                                                                                                                                                                                                                                                                                                                                                                                                                                                                                                                                                                                                                                                                                                                                                                                                                                                                                                                                                                                                                                                                                                                                 |
| YP_617306 | Sala_2264 | NUDIX hydrolase                                         | 27.34%            | 5                       |                                                                                                                                                                                                                                                                                                                                                                                                                                                                                                                                                                                                                                                                                                                                                                                                                                                                                                                                                                                                                                                                                                                                                                                                                                                                                                                                                                                                                                                                                                                                                                                                                                                                                                                                                                                                                                                                                                                                                                                                                                                                                                                                                                                                                                                                                                                                                                                                                                                                                                                                                                                                                                                                                                                                                                                                                                                                                                                                                                                                                                                                 |
| YP_617310 | Sala_2268 | protein-disulfide isomerase                             | 49.79%            | 9                       |                                                                                                                                                                                                                                                                                                                                                                                                                                                                                                                                                                                                                                                                                                                                                                                                                                                                                                                                                                                                                                                                                                                                                                                                                                                                                                                                                                                                                                                                                                                                                                                                                                                                                                                                                                                                                                                                                                                                                                                                                                                                                                                                                                                                                                                                                                                                                                                                                                                                                                                                                                                                                                                                                                                                                                                                                                                                                                                                                                                                                                                                 |
| YP_617311 | Sala_2269 | protein-disulfide isomerase                             | 66.94%            | 14                      |                                                                                                                                                                                                                                                                                                                                                                                                                                                                                                                                                                                                                                                                                                                                                                                                                                                                                                                                                                                                                                                                                                                                                                                                                                                                                                                                                                                                                                                                                                                                                                                                                                                                                                                                                                                                                                                                                                                                                                                                                                                                                                                                                                                                                                                                                                                                                                                                                                                                                                                                                                                                                                                                                                                                                                                                                                                                                                                                                                                                                                                                 |
| YP_617312 | Sala_2270 | Chromosome segregation protein SMC                      | 23.02%            | 19                      |                                                                                                                                                                                                                                                                                                                                                                                                                                                                                                                                                                                                                                                                                                                                                                                                                                                                                                                                                                                                                                                                                                                                                                                                                                                                                                                                                                                                                                                                                                                                                                                                                                                                                                                                                                                                                                                                                                                                                                                                                                                                                                                                                                                                                                                                                                                                                                                                                                                                                                                                                                                                                                                                                                                                                                                                                                                                                                                                                                                                                                                                 |
| YP_617316 | Sala_2274 | hypothetical protein                                    | 36.79%            | 15                      |                                                                                                                                                                                                                                                                                                                                                                                                                                                                                                                                                                                                                                                                                                                                                                                                                                                                                                                                                                                                                                                                                                                                                                                                                                                                                                                                                                                                                                                                                                                                                                                                                                                                                                                                                                                                                                                                                                                                                                                                                                                                                                                                                                                                                                                                                                                                                                                                                                                                                                                                                                                                                                                                                                                                                                                                                                                                                                                                                                                                                                                                 |
| YP_617317 | Sala_2275 | protein of unknown function DUF558                      | 35.74%            | 5                       |                                                                                                                                                                                                                                                                                                                                                                                                                                                                                                                                                                                                                                                                                                                                                                                                                                                                                                                                                                                                                                                                                                                                                                                                                                                                                                                                                                                                                                                                                                                                                                                                                                                                                                                                                                                                                                                                                                                                                                                                                                                                                                                                                                                                                                                                                                                                                                                                                                                                                                                                                                                                                                                                                                                                                                                                                                                                                                                                                                                                                                                                 |
| YP_617318 | Sala_2276 | Protein convertase, P                                   | 7.61%             | 2                       |                                                                                                                                                                                                                                                                                                                                                                                                                                                                                                                                                                                                                                                                                                                                                                                                                                                                                                                                                                                                                                                                                                                                                                                                                                                                                                                                                                                                                                                                                                                                                                                                                                                                                                                                                                                                                                                                                                                                                                                                                                                                                                                                                                                                                                                                                                                                                                                                                                                                                                                                                                                                                                                                                                                                                                                                                                                                                                                                                                                                                                                                 |
| YP_617319 | Sala_2277 | glutamate--cysteine ligase                              | 30.87%            | 9                       |                                                                                                                                                                                                                                                                                                                                                                                                                                                                                                                                                                                                                                                                                                                                                                                                                                                                                                                                                                                                                                                                                                                                                                                                                                                                                                                                                                                                                                                                                                                                                                                                                                                                                                                                                                                                                                                                                                                                                                                                                                                                                                                                                                                                                                                                                                                                                                                                                                                                                                                                                                                                                                                                                                                                                                                                                                                                                                                                                                                                                                                                 |
| YP_617321 | Sala_2279 | primosomal protein N'                                   | 10.39%            | 4                       |                                                                                                                                                                                                                                                                                                                                                                                                                                                                                                                                                                                                                                                                                                                                                                                                                                                                                                                                                                                                                                                                                                                                                                                                                                                                                                                                                                                                                                                                                                                                                                                                                                                                                                                                                                                                                                                                                                                                                                                                                                                                                                                                                                                                                                                                                                                                                                                                                                                                                                                                                                                                                                                                                                                                                                                                                                                                                                                                                                                                                                                                 |
| YP_617322 | Sala_2280 | hypothetical protein                                    | 20.82%            | 7                       |                                                                                                                                                                                                                                                                                                                                                                                                                                                                                                                                                                                                                                                                                                                                                                                                                                                                                                                                                                                                                                                                                                                                                                                                                                                                                                                                                                                                                                                                                                                                                                                                                                                                                                                                                                                                                                                                                                                                                                                                                                                                                                                                                                                                                                                                                                                                                                                                                                                                                                                                                                                                                                                                                                                                                                                                                                                                                                                                                                                                                                                                 |

| Accession | Locus tag | Description                           | Sequence coverage | No. peptides identified | List of peptides identified                                                                                                                                                                                                                                                                                                                                                                                                                                                                                                                                                                                                                                                                                                                                                                                                                                                                                                                                                                                                                                                                                                                                                                                                                                                                                                                                                                                                                                                                                                                                                                                                                                                                                                                                                                                                                                                                                                                                                                                                                                                                                                                                                                                                                                                                                                                                                                                                                                                                                                                                                                                                                                                                                                                                                                                                                                                                                                                                                                                                                                                                                                                                                                                                                                                                                             |
|-----------|-----------|---------------------------------------|-------------------|-------------------------|-------------------------------------------------------------------------------------------------------------------------------------------------------------------------------------------------------------------------------------------------------------------------------------------------------------------------------------------------------------------------------------------------------------------------------------------------------------------------------------------------------------------------------------------------------------------------------------------------------------------------------------------------------------------------------------------------------------------------------------------------------------------------------------------------------------------------------------------------------------------------------------------------------------------------------------------------------------------------------------------------------------------------------------------------------------------------------------------------------------------------------------------------------------------------------------------------------------------------------------------------------------------------------------------------------------------------------------------------------------------------------------------------------------------------------------------------------------------------------------------------------------------------------------------------------------------------------------------------------------------------------------------------------------------------------------------------------------------------------------------------------------------------------------------------------------------------------------------------------------------------------------------------------------------------------------------------------------------------------------------------------------------------------------------------------------------------------------------------------------------------------------------------------------------------------------------------------------------------------------------------------------------------------------------------------------------------------------------------------------------------------------------------------------------------------------------------------------------------------------------------------------------------------------------------------------------------------------------------------------------------------------------------------------------------------------------------------------------------------------------------------------------------------------------------------------------------------------------------------------------------------------------------------------------------------------------------------------------------------------------------------------------------------------------------------------------------------------------------------------------------------------------------------------------------------------------------------------------------------------------------------------------------------------------------------------------------|
| YP_617323 | Sala_2281 | hypothetical protein                  | 81.82%            | 12                      | K.GAAAPVAPADADQ.<br>R.IAYALALAHDDGLDR.A<br>R.DTVSNADWWAAR.Q<br>R.ADGEDFLEDFENLDR.I<br>K.AIATGSFVAGVQGR.A<br>R.ALHVPGDPLLVNIWDAGSAK.A<br>R.AYADAGAGSLFVFFLLDPK.C<br>R.AAADTGIFVNR.C<br>R.SDLLPVAEAVR.Y<br>K.DGDALVAATLEK.A<br>R.GQDVAKGDALVAATLER.A<br>R.ILSVTDLPVTIDMESGYGADPAAVGASVGR.A<br>R.HAGAAGINMEDRLPGR.S<br>R.ISHGHQPWAAAMAWLGAQAQVLLGGGEPDY.<br>K.CIGAIACDASPLPVNLLR.G<br>R.ADDGDSPPAFALAGR.E<br>R.YPCNVALGVVPSGQK.S<br>R.VVTVAMVEGEVWFGHSGIAISPTR.I<br>R.IVTNAHVESAAR.Y<br>R.ILVNEEATVTVASIDAAGR.E<br>R.SANDYITPR.T<br>R.ITVSSITDVPTR.I<br>R.DLALVEITTEGRLPAAAIYTGPLDAGADVVALGYPCNVDLATAR.S<br>R.ASGAAVEGALAGE.<br>R.ADEADAANKNAAK.L<br>K.KSSAADAPQLAEGSLCTIR.P<br>K.IAGGVGAALLLAAAILFATR.P<br>R.EHPGFESYSGPQFER.A<br>R.GGLLVQEIFGVTDHIR.E<br>R.RGGLLVQEIFGVTDHIR.E<br>R.FDGGIPMEGVEALAK.N<br>K.NHPTAQFVVEAGHFNDSR.R<br>K.VIKDQIANFGTDATVTEIGSVLSVGDGIAR.V<br>K.ALVAALDAFAK.I<br>R.EATPGDVLYHSR.L<br>K.TAVADITFINQK.A<br>R.YEAAMLAYLR.S<br>R.VVDGLGNPIDGKGPVK.A<br>R.SDHPQVLAAR.D<br>K.ALDAALVPR.G<br>R.TGTVDVPGVK.G<br>R.VVDGLGNPIDGK.G<br>R.EMEAFQFSGDLASTQK.L<br>R.VHGLDNVQAGEMVEFANGVK.G<br>R.TSVHEPVQTKL.A<br>R.DNMGHAIIVYDLSK.Q<br>K.DQIANFGTDATVTEIGSVLSVGDGIAR.V<br>K.AANAGDDESKK.L<br>K.QPQFQMPFEEQTSIFAGTNGYLDVATDVS.R.Y<br>K.KALVAALDAFAK.I<br>K.GMALNLEADNVGIVFGSDAAIK.E<br>K.RSTVAQIVR.Q<br>K.DLGGDTK.K<br>R.STVAQIVR.Q<br>K.LELAQYR.E<br>K.AANAGDDESK.K<br>R.DSKDLGGDTK.K<br>K.RTGTVDVPGVK.G<br>R.YEAAMLAYLR.S<br>R.VHGLDNVQAGEMVEFANGVK.G<br>R.SDHPQVLAAR.D<br>R.EMEAFQFSGDLASTQK.L<br>R.ELIIGDRQTKG.T<br>R.DSKDLGGDTK.K<br>R.DNMGHAIIVYDLSK.Q<br>K.LYCYVAVGQK.R<br>K.GMALNLEADNVGIVFGSDAAIK.E<br>R.VEVKAPGIIPR.T<br>R.PAINVGLSVSR.V<br>R.LTQLK.Q<br>K.KVSGSIK.L<br>K.DLGGDTK.K<br>K.APGIIPR.T<br>R.LFPGQIIIEQYDTTIR.D<br>K.VLFYLVGR.K<br>R.DIGFDQASEISAR.V<br>K.SDTHLLVLSNDR.G<br>R.VMELYEAGAFVAHLFYSK.F<br>R.LEGVVASLASK.V<br>R.DKALELQSQGK.K<br>K.AQAAAAEAPYAEAR.L<br>R.QAAITTELEIIAGAEAL.<br>R.GLAGAFNSIVK.A<br>R.LFPGQIIIEQYDTTIR.DIGFDQASEISAR.V<br>R.NAGELINK.L<br>K.VGASDSAPK.L<br>R.NVTIQIFK.G<br>K.GLENAASEQASMTAMDNATR.N<br>K.ALELQSQGK.K<br>R.NAGELINKLTIYNR.T<br>K.VLFYLVGR.K<br>R.VMELYEAGAFVAHLFYSK.F<br>R.TRQAITTELEIIAGAEAL.<br>R.PYAELEGVVASLASK.V<br>R.DKALELQSQGK.V<br>K.TVLQELINNIK.G<br>R.FTQAGSEVSALLGR.I<br>R.FLSQPHEVFTGIPGK.F<br>R.LVLEVAQHLGENTVR.T<br>R.DTGAQISVPVGPQLGR.I<br>K.DADGNPTPDGSK.V<br>R.TREGNDLYHEFLDAGVIAK.D<br>R.AISELGIYPAVDRLDSTR.V<br>R.VLTPAIVGQEHYETAR.R<br>R.IPSAVGYQTLSTDMGALQER.I<br>R.ILNVIGEPIDER.G<br>R.DQEQDVLFFVDNIFR.F<br>K.IGLFSGAGVVK.T<br>K.APEFVQDQSTASLVTGK.V<br>R.EGNDLYHEFLDAGVIAK.D<br>K.VIDLIAPIYAK.G<br>K.SLQDIIAILGMDELSEEDKLVAR.A<br>R.VALSGLTMAEYFR.D<br>K.VALVFGMNEPPGAR.A<br>K.GHGSVVFAGVGR.T<br>R.TIAMDATDGLTR.G<br>K.AVVDGEYDHLPEAFYVGGIDEAVAK.A<br>K.AAAPVGAATGR.I<br>R.RVQETLQK.Y<br>R.GPVNSDMTAPIHAK.A<br>R.ILNVIGEPIDERGPVNSDMTAPIHAK.A<br>R.GQPVRTGQISVVPQTLGR.I<br>K.GSITSVQAIYVADDLTPAPATSFHLDATTLR.S.A<br>R.VLTPAIVGQEHYETAR.R<br>R.IAQVIGAVVDVQFTGELPAILETONNGNR.L<br>R.VALSGLTMAEYFRDQEQDVLFFVDNIFR.F<br>K.IGLFSGAGVVK.TVLQELINNIK.G<br>R.VALSGLTMAEYFR.D<br>R.TIAMDATDGLTR.G<br>R.IPSAVGYQTLSTDMGALQER.I<br>R.ILNVIGEPIDERGPVNSDMTAPIHAK.A<br>K.VALVFGMNEPPGAR.A<br>K.AVVDGEYDHLPEAFYVGGIDEAVAK.A<br>K.APEFVQDQSTASLVTGKVIDLIAPIYAK.G<br>R.GPVNSDMTAPIHAK.A<br>K.SLQDIIAILGMDELSEEDKLVAR.A<br>K.FVPIETVK.S |
| YP_617326 | Sala_2284 | peptidase S1 and S6, chymotrypsin/Hap | 43.00%            | 12                      | K.CIGAIACDASPLPVNLLR.G<br>R.ADDGDSPPAFALAGR.E<br>R.YPCNVALGVVPSGQK.S<br>R.VVTVAMVEGEVWFGHSGIAISPTR.I<br>R.IVTNAHVESAAR.Y<br>R.ILVNEEATVTVASIDAAGR.E<br>R.SANDYITPR.T<br>R.ITVSSITDVPTR.I<br>R.DLALVEITTEGRLPAAAIYTGPLDAGADVVALGYPCNVDLATAR.S<br>R.ASGAAVEGALAGE.<br>R.ADEADAANKNAAK.L<br>K.KSSAADAPQLAEGSLCTIR.P<br>K.IAGGVGAALLLAAAILFATR.P<br>R.EHPGFESYSGPQFER.A<br>R.GGLLVQEIFGVTDHIR.E<br>R.RGGLLVQEIFGVTDHIR.E<br>R.FDGGIPMEGVEALAK.N<br>K.NHPTAQFVVEAGHFNDSR.R<br>K.VIKDQIANFGTDATVTEIGSVLSVGDGIAR.V<br>K.ALVAALDAFAK.I<br>R.EATPGDVLYHSR.L<br>K.TAVADITFINQK.A<br>R.YEAAMLAYLR.S<br>R.VVDGLGNPIDGKGPVK.A<br>R.SDHPQVLAAR.D<br>K.ALDAALVPR.G<br>R.TGTVDVPGVK.G<br>R.VVDGLGNPIDGK.G<br>R.EMEAFQFSGDLASTQK.L<br>R.VHGLDNVQAGEMVEFANGVK.G<br>R.TSVHEPVQTKL.A<br>R.DNMGHAIIVYDLSK.Q<br>K.DQIANFGTDATVTEIGSVLSVGDGIAR.V<br>K.AANAGDDESKK.L<br>K.QPQFQMPFEEQTSIFAGTNGYLDVATDVS.R.Y<br>K.KALVAALDAFAK.I<br>K.GMALNLEADNVGIVFGSDAAIK.E<br>K.RSTVAQIVR.Q<br>K.DLGGDTK.K<br>R.STVAQIVR.Q<br>K.LELAQYR.E<br>K.AANAGDDESK.K<br>R.DSKDLGGDTK.K<br>K.RTGTVDVPGVK.G<br>R.YEAAMLAYLR.S<br>R.VHGLDNVQAGEMVEFANGVK.G<br>R.SDHPQVLAAR.D<br>R.EMEAFQFSGDLASTQK.L<br>R.ELIIGDRQTKG.T<br>R.DSKDLGGDTK.K<br>R.DNMGHAIIVYDLSK.Q<br>K.LYCYVAVGQK.R<br>K.GMALNLEADNVGIVFGSDAAIK.E<br>R.VEVKAPGIIPR.T<br>R.PAINVGLSVSR.V<br>R.LTQLK.Q<br>K.KVSGSIK.L<br>K.DLGGDTK.K<br>K.APGIIPR.T<br>R.LFPGQIIIEQYDTTIR.D<br>K.VLFYLVGR.K<br>R.DIGFDQASEISAR.V<br>K.SDTHLLVLSNDR.G<br>R.VMELYEAGAFVAHLFYSK.F<br>R.LEGVVASLASK.V<br>R.DKALELQSQGK.K<br>K.AQAAAAEAPYAEAR.L<br>R.QAAITTELEIIAGAEAL.<br>R.GLAGAFNSIVK.A<br>R.LFPGQIIIEQYDTTIR.DIGFDQASEISAR.V<br>R.NAGELINK.L<br>K.VGASDSAPK.L<br>R.NVTIQIFK.G<br>K.GLENAASEQASMTAMDNATR.N<br>K.ALELQSQGK.K<br>R.NAGELINKLTIYNR.T<br>K.VLFYLVGR.K<br>R.VMELYEAGAFVAHLFYSK.F<br>R.TRQAITTELEIIAGAEAL.<br>R.PYAELEGVVASLASK.V<br>R.DKALELQSQGK.V<br>K.TVLQELINNIK.G<br>R.FTQAGSEVSALLGR.I<br>R.FLSQPHEVFTGIPGK.F<br>R.LVLEVAQHLGENTVR.T<br>R.DTGAQISVPVGPQLGR.I<br>K.DADGNPTPDGSK.V<br>R.TREGNDLYHEFLDAGVIAK.D<br>R.AISELGIYPAVDRLDSTR.V<br>R.VLTPAIVGQEHYETAR.R<br>R.IPSAVGYQTLSTDMGALQER.I<br>R.ILNVIGEPIDER.G<br>R.DQEQDVLFFVDNIFR.F<br>K.IGLFSGAGVVK.T<br>K.APEFVQDQSTASLVTGK.V<br>R.EGNDLYHEFLDAGVIAK.D<br>K.VIDLIAPIYAK.G<br>K.SLQDIIAILGMDELSEEDKLVAR.A<br>R.VALSGLTMAEYFR.D<br>K.VALVFGMNEPPGAR.A<br>K.GHGSVVFAGVGR.T<br>R.TIAMDATDGLTR.G<br>K.AVVDGEYDHLPEAFYVGGIDEAVAK.A<br>K.AAAPVGAATGR.I<br>R.RVQETLQK.Y<br>R.GPVNSDMTAPIHAK.A<br>R.ILNVIGEPIDERGPVNSDMTAPIHAK.A<br>R.GQPVRTGQISVVPQTLGR.I<br>K.GSITSVQAIYVADDLTPAPATSFHLDATTLR.S.A<br>R.VLTPAIVGQEHYETAR.R<br>R.IAQVIGAVVDVQFTGELPAILETONNGNR.L<br>R.VALSGLTMAEYFRDQEQDVLFFVDNIFR.F<br>K.IGLFSGAGVVK.TVLQELINNIK.G<br>R.VALSGLTMAEYFR.D<br>R.TIAMDATDGLTR.G<br>R.IPSAVGYQTLSTDMGALQER.I<br>R.ILNVIGEPIDERGPVNSDMTAPIHAK.A<br>K.VALVFGMNEPPGAR.A<br>K.AVVDGEYDHLPEAFYVGGIDEAVAK.A<br>K.APEFVQDQSTASLVTGKVIDLIAPIYAK.G<br>R.GPVNSDMTAPIHAK.A<br>K.SLQDIIAILGMDELSEEDKLVAR.A<br>K.FVPIETVK.S                                                                                                                                                                                                                                                                                                                                                          |
| YP_617327 | Sala_2285 | Carboxymethylenebutenolidase          | 30.43%            | 5                       | K.IAGGVGAALLLAAAILFATR.P<br>R.EHPGFESYSGPQFER.A<br>R.GGLLVQEIFGVTDHIR.E<br>R.RGGLLVQEIFGVTDHIR.E<br>R.FDGGIPMEGVEALAK.N<br>K.NHPTAQFVVEAGHFNDSR.R<br>K.VIKDQIANFGTDATVTEIGSVLSVGDGIAR.V<br>K.ALVAALDAFAK.I<br>R.EATPGDVLYHSR.L<br>K.TAVADITFINQK.A<br>R.YEAAMLAYLR.S<br>R.VVDGLGNPIDGKGPVK.A<br>R.SDHPQVLAAR.D<br>K.ALDAALVPR.G<br>R.TGTVDVPGVK.G<br>R.VVDGLGNPIDGK.G<br>R.EMEAFQFSGDLASTQK.L<br>R.VHGLDNVQAGEMVEFANGVK.G<br>R.TSVHEPVQTKL.A<br>R.DNMGHAIIVYDLSK.Q<br>K.DQIANFGTDATVTEIGSVLSVGDGIAR.V<br>K.AANAGDDESKK.L<br>K.QPQFQMPFEEQTSIFAGTNGYLDVATDVS.R.Y<br>K.KALVAALDAFAK.I<br>K.GMALNLEADNVGIVFGSDAAIK.E<br>K.RSTVAQIVR.Q<br>K.DLGGDTK.K<br>R.STVAQIVR.Q<br>K.LELAQYR.E<br>K.AANAGDDESK.K<br>R.DSKDLGGDTK.K<br>K.RTGTVDVPGVK.G<br>R.YEAAMLAYLR.S<br>R.VHGLDNVQAGEMVEFANGVK.G<br>R.SDHPQVLAAR.D<br>R.EMEAFQFSGDLASTQK.L<br>R.ELIIGDRQTKG.T<br>R.DSKDLGGDTK.K<br>R.DNMGHAIIVYDLSK.Q<br>K.LYCYVAVGQK.R<br>K.GMALNLEADNVGIVFGSDAAIK.E<br>R.VEVKAPGIIPR.T<br>R.PAINVGLSVSR.V<br>R.LTQLK.Q<br>K.KVSGSIK.L<br>K.DLGGDTK.K<br>K.APGIIPR.T<br>R.LFPGQIIIEQYDTTIR.D<br>K.VLFYLVGR.K<br>R.DIGFDQASEISAR.V<br>K.SDTHLLVLSNDR.G<br>R.VMELYEAGAFVAHLFYSK.F<br>R.LEGVVASLASK.V<br>R.DKALELQSQGK.K<br>K.AQAAAAEAPYAEAR.L<br>R.QAAITTELEIIAGAEAL.<br>R.GLAGAFNSIVK.A<br>R.LFPGQIIIEQYDTTIR.DIGFDQASEISAR.V<br>R.NAGELINK.L<br>K.VGASDSAPK.L<br>R.NVTIQIFK.G<br>K.GLENAASEQASMTAMDNATR.N<br>K.ALELQSQGK.K<br>R.NAGELINKLTIYNR.T<br>K.VLFYLVGR.K<br>R.VMELYEAGAFVAHLFYSK.F<br>R.TRQAITTELEIIAGAEAL.<br>R.PYAELEGVVASLASK.V<br>R.DKALELQSQGK.V<br>K.TVLQELINNIK.G<br>R.FTQAGSEVSALLGR.I<br>R.FLSQPHEVFTGIPGK.F<br>R.LVLEVAQHLGENTVR.T<br>R.DTGAQISVPVGPQLGR.I<br>K.DADGNPTPDGSK.V<br>R.TREGNDLYHEFLDAGVIAK.D<br>R.AISELGIYPAVDRLDSTR.V<br>R.VLTPAIVGQEHYETAR.R<br>R.IPSAVGYQTLSTDMGALQER.I<br>R.ILNVIGEPIDER.G<br>R.DQEQDVLFFVDNIFR.F<br>K.IGLFSGAGVVK.T<br>K.APEFVQDQSTASLVTGK.V<br>R.EGNDLYHEFLDAGVIAK.D<br>K.VIDLIAPIYAK.G<br>K.SLQDIIAILGMDELSEEDKLVAR.A<br>R.VALSGLTMAEYFR.D<br>K.VALVFGMNEPPGAR.A<br>K.GHGSVVFAGVGR.T<br>R.TIAMDATDGLTR.G<br>K.AVVDGEYDHLPEAFYVGGIDEAVAK.A<br>K.AAAPVGAATGR.I<br>R.RVQETLQK.Y<br>R.GPVNSDMTAPIHAK.A<br>R.ILNVIGEPIDERGPVNSDMTAPIHAK.A<br>R.GQPVRTGQISVVPQTLGR.I<br>K.GSITSVQAIYVADDLTPAPATSFHLDATTLR.S.A<br>R.VLTPAIVGQEHYETAR.R<br>R.IAQVIGAVVDVQFTGELPAILETONNGNR.L<br>R.VALSGLTMAEYFRDQEQDVLFFVDNIFR.F<br>K.IGLFSGAGVVK.TVLQELINNIK.G<br>R.VALSGLTMAEYFR.D<br>R.TIAMDATDGLTR.G<br>R.IPSAVGYQTLSTDMGALQER.I<br>R.ILNVIGEPIDERGPVNSDMTAPIHAK.A<br>K.VALVFGMNEPPGAR.A<br>K.AVVDGEYDHLPEAFYVGGIDEAVAK.A<br>K.APEFVQDQSTASLVTGKVIDLIAPIYAK.G<br>R.GPVNSDMTAPIHAK.A<br>K.SLQDIIAILGMDELSEEDKLVAR.A<br>K.FVPIETVK.S                                                                                                                                                                                                                                                                                                                                                                                                                                                                                                                                                                                                                                                                              |
| YP_617328 | Sala_2286 | ATP synthase F1, alpha subunit        | 67.98%            | 41                      | K.VIKDQIANFGTDATVTEIGSVLSVGDGIAR.V<br>K.ALVAALDAFAK.I<br>R.EATPGDVLYHSR.L<br>K.TAVADITFINQK.A<br>R.YEAAMLAYLR.S<br>R.VVDGLGNPIDGKGPVK.A<br>R.SDHPQVLAAR.D<br>K.ALDAALVPR.G<br>R.TGTVDVPGVK.G<br>R.VVDGLGNPIDGK.G<br>R.EMEAFQFSGDLASTQK.L<br>R.VHGLDNVQAGEMVEFANGVK.G<br>R.TSVHEPVQTKL.A<br>R.DNMGHAIIVYDLSK.Q<br>K.DQIANFGTDATVTEIGSVLSVGDGIAR.V<br>K.AANAGDDESKK.L<br>K.QPQFQMPFEEQTSIFAGTNGYLDVATDVS.R.Y<br>K.KALVAALDAFAK.I<br>K.GMALNLEADNVGIVFGSDAAIK.E<br>K.RSTVAQIVR.Q<br>K.DLGGDTK.K<br>R.STVAQIVR.Q<br>K.LELAQYR.E<br>K.AANAGDDESK.K<br>R.DSKDLGGDTK.K<br>K.RTGTVDVPGVK.G<br>R.YEAAMLAYLR.S<br>R.VHGLDNVQAGEMVEFANGVK.G<br>R.SDHPQVLAAR.D<br>R.EMEAFQFSGDLASTQK.L<br>R.ELIIGDRQTKG.T<br>R.DSKDLGGDTK.K<br>R.DNMGHAIIVYDLSK.Q<br>K.LYCYVAVGQK.R<br>K.GMALNLEADNVGIVFGSDAAIK.E<br>R.VEVKAPGIIPR.T<br>R.PAINVGLSVSR.V<br>R.LTQLK.Q<br>K.KVSGSIK.L<br>K.DLGGDTK.K<br>K.APGIIPR.T<br>R.LFPGQIIIEQYDTTIR.D<br>K.VLFYLVGR.K<br>R.DIGFDQASEISAR.V<br>K.SDTHLLVLSNDR.G<br>R.VMELYEAGAFVAHLFYSK.F<br>R.LEGVVASLASK.V<br>R.DKALELQSQGK.K<br>K.AQAAAAEAPYAEAR.L<br>R.QAAITTELEIIAGAEAL.<br>R.GLAGAFNSIVK.A<br>R.LFPGQIIIEQYDTTIR.DIGFDQASEISAR.V<br>R.NAGELINK.L<br>K.VGASDSAPK.L<br>R.NVTIQIFK.G<br>K.GLENAASEQASMTAMDNATR.N<br>K.ALELQSQGK.K<br>R.NAGELINKLTIYNR.T<br>K.VLFYLVGR.K<br>R.VMELYEAGAFVAHLFYSK.F<br>R.TRQAITTELEIIAGAEAL.<br>R.PYAELEGVVASLASK.V<br>R.DKALELQSQGK.V<br>K.TVLQELINNIK.G<br>R.FTQAGSEVSALLGR.I<br>R.FLSQPHEVFTGIPGK.F<br>R.LVLEVAQHLGENTVR.T<br>R.DTGAQISVPVGPQLGR.I<br>K.DADGNPTPDGSK.V<br>R.TREGNDLYHEFLDAGVIAK.D<br>R.AISELGIYPAVDRLDSTR.V<br>R.VLTPAIVGQEHYETAR.R<br>R.IPSAVGYQTLSTDMGALQER.I<br>R.ILNVIGEPIDER.G<br>R.DQEQDVLFFVDNIFR.F<br>K.IGLFSGAGVVK.T<br>K.APEFVQDQSTASLVTGK.V<br>R.EGNDLYHEFLDAGVIAK.D<br>K.VIDLIAPIYAK.G<br>K.SLQDIIAILGMDELSEEDKLVAR.A<br>R.VALSGLTMAEYFR.D<br>K.VALVFGMNEPPGAR.A<br>K.GHGSVVFAGVGR.T<br>R.TIAMDATDGLTR.G<br>K.AVVDGEYDHLPEAFYVGGIDEAVAK.A<br>K.AAAPVGAATGR.I<br>R.RVQETLQK.Y<br>R.GPVNSDMTAPIHAK.A<br>R.ILNVIGEPIDERGPVNSDMTAPIHAK.A<br>R.GQPVRTGQISVVPQTLGR.I<br>K.GSITSVQAIYVADDLTPAPATSFHLDATTLR.S.A<br>R.VLTPAIVGQEHYETAR.R<br>R.IAQVIGAVVDVQFTGELPAILETONNGNR.L<br>R.VALSGLTMAEYFRDQEQDVLFFVDNIFR.F<br>K.IGLFSGAGVVK.TVLQELINNIK.G<br>R.VALSGLTMAEYFR.D<br>R.TIAMDATDGLTR.G<br>R.IPSAVGYQTLSTDMGALQER.I<br>R.ILNVIGEPIDERGPVNSDMTAPIHAK.A<br>K.VALVFGMNEPPGAR.A<br>K.AVVDGEYDHLPEAFYVGGIDEAVAK.A<br>K.APEFVQDQSTASLVTGKVIDLIAPIYAK.G<br>R.GPVNSDMTAPIHAK.A<br>K.SLQDIIAILGMDELSEEDKLVAR.A<br>K.FVPIETVK.S                                                                                                                                                                                                                                                                                                                                                                                                                                                                                                                                                                                                                                                                                                                                                                                                                                   |
| YP_617329 | Sala_2287 | ATP synthase F1, gamma subunit        | 68.04%            | 22                      | R.LFPGQIIIEQYDTTIR.D<br>K.VLFYLVGR.K<br>R.DIGFDQASEISAR.V<br>K.SDTHLLVLSNDR.G<br>R.VMELYEAGAFVAHLFYSK.F<br>R.LEGVVASLASK.V<br>R.DKALELQSQGK.K<br>K.AQAAAAEAPYAEAR.L<br>R.QAAITTELEIIAGAEAL.<br>R.GLAGAFNSIVK.A<br>R.LFPGQIIIEQYDTTIR.DIGFDQASEISAR.V<br>R.NAGELINK.L<br>K.VGASDSAPK.L<br>R.NVTIQIFK.G<br>K.GLENAASEQASMTAMDNATR.N<br>K.ALELQSQGK.K<br>R.NAGELINKLTIYNR.T<br>K.VLFYLVGR.K<br>R.VMELYEAGAFVAHLFYSK.F<br>R.TRQAITTELEIIAGAEAL.<br>R.PYAELEGVVASLASK.V<br>R.DKALELQSQGK.V<br>K.TVLQELINNIK.G<br>R.FTQAGSEVSALLGR.I<br>R.FLSQPHEVFTGIPGK.F<br>R.LVLEVAQHLGENTVR.T<br>R.DTGAQISVPVGPQLGR.I<br>K.DADGNPTPDGSK.V<br>R.TREGNDLYHEFLDAGVIAK.D<br>R.AISELGIYPAVDRLDSTR.V<br>R.VLTPAIVGQEHYETAR.R<br>R.IPSAVGYQTLSTDMGALQER.I<br>R.ILNVIGEPIDER.G<br>R.DQEQDVLFFVDNIFR.F<br>K.IGLFSGAGVVK.T<br>K.APEFVQDQSTASLVTGK.V<br>R.EGNDLYHEFLDAGVIAK.D<br>K.VIDLIAPIYAK.G<br>K.SLQDIIAILGMDELSEEDKLVAR.A<br>R.VALSGLTMAEYFR.D<br>K.VALVFGMNEPPGAR.A<br>K.GHGSVVFAGVGR.T<br>R.TIAMDATDGLTR.G<br>K.AVVDGEYDHLPEAFYVGGIDEAVAK.A<br>K.AAAPVGAATGR.I<br>R.RVQETLQK.Y<br>R.GPVNSDMTAPIHAK.A<br>R.ILNVIGEPIDERGPVNSDMTAPIHAK.A<br>R.GQPVRTGQISVVPQTLGR.I<br>K.GSITSVQAIYVADDLTPAPATSFHLDATTLR.S.A<br>R.VLTPAIVGQEHYETAR.R<br>R.IAQVIGAVVDVQFTGELPAILETONNGNR.L<br>R.VALSGLTMAEYFRDQEQDVLFFVDNIFR.F<br>K.IGLFSGAGVVK.TVLQELINNIK.G<br>R.VALSGLTMAEYFR.D<br>R.TIAMDATDGLTR.G<br>R.IPSAVGYQTLSTDMGALQER.I<br>R.ILNVIGEPIDERGPVNSDMTAPIHAK.A<br>K.VALVFGMNEPPGAR.A<br>K.AVVDGEYDHLPEAFYVGGIDEAVAK.A<br>K.APEFVQDQSTASLVTGKVIDLIAPIYAK.G<br>R.GPVNSDMTAPIHAK.A<br>K.SLQDIIAILGMDELSEEDKLVAR.A<br>K.FVPIETVK.S                                                                                                                                                                                                                                                                                                                                                                                                                                                                                                                                                                                                                                                                                                                                                                                                                                                                                                                                                                                                                                                                                                                                                                                                                                                                                                                                                                                                                                                                                                                                                                                                                                                                                                                            |
| YP_617330 | Sala_2288 | ATP synthase F1, beta subunit         | 88.30%            | 42                      | R.LFPGQIIIEQYDTTIR.D<br>K.VLFYLVGR.K<br>R.DIGFDQASEISAR.V<br>K.SDTHLLVLSNDR.G<br>R.VMELYEAGAFVAHLFYSK.F<br>R.LEGVVASLASK.V<br>R.DKALELQSQGK.K<br>K.AQAAAAEAPYAEAR.L<br>R.QAAITTELEIIAGAEAL.<br>R.GLAGAFNSIVK.A<br>R.LFPGQIIIEQYDTTIR.DIGFDQASEISAR.V<br>R.NAGELINK.L<br>K.VGASDSAPK.L<br>R.NVTIQIFK.G<br>K.GLENAASEQASMTAMDNATR.N<br>K.ALELQSQGK.K<br>R.NAGELINKLTIYNR.T<br>K.VLFYLVGR.K<br>R.VMELYEAGAFVAHLFYSK.F<br>R.TRQAITTELEIIAGAEAL.<br>R.PYAELEGVVASLASK.V<br>R.DKALELQSQGK.V<br>K.TVLQELINNIK.G<br>R.FTQAGSEVSALLGR.I<br>R.FLSQPHEVFTGIPGK.F<br>R.LVLEVAQHLGENTVR.T<br>R.DTGAQISVPVGPQLGR.I<br>K.DADGNPTPDGSK.V<br>R.TREGNDLYHEFLDAGVIAK.D<br>R.AISELGIYPAVDRLDSTR.V<br>R.VLTPAIVGQEHYETAR.R<br>R.IPSAVGYQTLSTDMGALQER.I<br>R.ILNVIGEPIDER.G<br>R.DQEQDVLFFVDNIFR.F<br>K.IGLFSGAGVVK.T<br>K.APEFVQDQSTASLVTGK.V<br>R.EGNDLYHEFLDAGVIAK.D<br>K.VIDLIAPIYAK.G<br>K.SLQDIIAILGMDELSEEDKLVAR.A<br>R.VALSGLTMAEYFR.D<br>K.VALVFGMNEPPGAR.A<br>K.GHGSVVFAGVGR.T<br>R.TIAMDATDGLTR.G<br>K.AVVDGEYDHLPEAFYVGGIDEAVAK.A<br>K.AAAPVGAATGR.I<br>R.RVQETLQK.Y<br>R.GPVNSDMTAPIHAK.A<br>R.ILNVIGEPIDERGPVNSDMTAPIHAK.A<br>R.GQPVRTGQISVVPQTLGR.I<br>K.GSITSVQAIYVADDLTPAPATSFHLDATTLR.S.A<br>R.VLTPAIVGQEHYETAR.R<br>R.IAQVIGAVVDVQFTGELPAILETONNGNR.L<br>R.VALSGLTMAEYFRDQEQDVLFFVDNIFR.F<br>K.IGLFSGAGVVK.TVLQELINNIK.G<br>R.VALSGLTMAEYFR.D<br>R.TIAMDATDGLTR.G<br>R.IPSAVGYQTLSTDMGALQER.I<br>R.ILNVIGEPIDERGPVNSDMTAPIHAK.A<br>K.VALVFGMNEPPGAR.A<br>K.AVVDGEYDHLPEAFYVGGIDEAVAK.A<br>K.APEFVQDQSTASLVTGKVIDLIAPIYAK.G<br>R.GPVNSDMTAPIHAK.A<br>K.SLQDIIAILGMDELSEEDKLVAR.A<br>K.FVPIETVK.S                                                                                                                                                                                                                                                                                                                                                                                                                                                                                                                                                                                                                                                                                                                                                                                                                                                                                                                                                                                                                                                                                                                                                                                                                                                                                                                                                                                                                                                                                                                                                                                                                                                                                                                            |



| Accession | Locus tag | Description                                    | Sequence coverage | No. peptides identified | List of peptides identified                                                                                                                                                                                                                                                                                                                                                                                                                                                                                                                                                                                                                                                                                                                                                                                                                                                                                                                                                                                                                                                                                                                                                                                                                                                                                                                                                                                                                                                                                                                                                                                                                                                                                                                                                                                                                                                                                                                                                                                                                                                                                                                                                                                                                                                                                                              |
|-----------|-----------|------------------------------------------------|-------------------|-------------------------|------------------------------------------------------------------------------------------------------------------------------------------------------------------------------------------------------------------------------------------------------------------------------------------------------------------------------------------------------------------------------------------------------------------------------------------------------------------------------------------------------------------------------------------------------------------------------------------------------------------------------------------------------------------------------------------------------------------------------------------------------------------------------------------------------------------------------------------------------------------------------------------------------------------------------------------------------------------------------------------------------------------------------------------------------------------------------------------------------------------------------------------------------------------------------------------------------------------------------------------------------------------------------------------------------------------------------------------------------------------------------------------------------------------------------------------------------------------------------------------------------------------------------------------------------------------------------------------------------------------------------------------------------------------------------------------------------------------------------------------------------------------------------------------------------------------------------------------------------------------------------------------------------------------------------------------------------------------------------------------------------------------------------------------------------------------------------------------------------------------------------------------------------------------------------------------------------------------------------------------------------------------------------------------------------------------------------------------|
| YP_617332 | Sala_2290 | type II secretion system protein E             | 6.22%             | 2                       | R.VNVVPPLSLR.G<br>R.STAEAVEPEKAQGFASVHK.I<br>R.LNEDDDAAKEEK.S<br>K.ESSIAFAEAAGFELAGK.S<br>K.VPDGSADVLLTR.N<br>K.AGGGTLVAAPWER.G<br>R.FGGADNTANAFK.Q<br>K.QAADTATYGALR.L<br>R.LAEFPATGAGPK.V<br>K.QIFAMKPGGTLGVWEHR.L<br>R.EKQAADTATYGALR.L<br>K.YVAIGESDR.M<br>K.GVWTLPPVLR.E<br>K.DTKDYEK.G<br>R.NPAETLAFFGVK.P<br>K.SEINANPKDTK.D<br>R.NPAETLAFFGVKPGDVTVELWPGGWYTEILAPLTK.A<br>R.AKYVAIGESDR.M<br>K.PGDTVVELWPGGWYTEILAPLTK.A<br>R.ATGSPPGYVIVQLLNTS.<br>K.VALAHVAR.L<br>R.VPPEWHGWLHSTFDELADVLPAAPR.A<br>R.AAATGDEYEAWRPGAD.<br>K.IFTWWDGATVGTLLNSWAR.G<br>R.RPLAWLDLISR.N<br>R.MLFFPPEIAAMAVEAEQR.G<br>R.LIAAGVKPQDR.I<br>R.GVEPLDWTAFAR.A<br>R.DEAGNPLDQTVGK.V<br>R.FSDFATVGEALDYAASGTR.G<br>R.AQYLAGEIQPFAIAA.<br>R.RFSDFATVGEALDYAASGTR.G<br>R.VAGNGADMIRPDVMQAFVDAFADAGFK.A<br>R.ISSQSIVADR.F<br>K.NHWQDIEWAVEQLPGFK.S<br>K.DMVEVDEAGNPLDQTVGK.V<br>R.ADALAAAYR.L<br>K.LAGEVEAWFEDVAGEEGAPAAD.<br>R.SPHFDLEVLQR.G                                                                                                                                                                                                                                                                                                                                                                                                                                                                                                                                                                                                                                                                                                                                                                                                                                                                                                                                                                                                                                                                                                                                                                                                                                                                                                                                                                                                               |
| YP_617333 | Sala_2291 | Methyltransferase type 11                      | 56.63%            | 17                      | R.VTNWLNSEDTSLLR.D<br>R.GIPAVPILVAVP.<br>K.YAFVAHDLVFK.H<br>R.RVTNWLSEDTSLLR.D<br>R.IVQYSHLNGFEFLK.Y<br>R.GLEPIMTYNQDFVK.D<br>R.LLSPDMNKEFAR.L<br>R.LFADHWTER.R<br>R.GLEPIMTYNQDFVKDR.V<br>R.DIMSLEPQAQK.E<br>R.GVTLNDGPTR.P<br>R.ATLSDYIDVPGVYPAGR.L<br>R.VLYQTDESQR.T<br>K.AALGLKRPVWVK.I<br>R.DGTLEPLFETIVR.H<br>R.ITESADKDSFEVAGR.G<br>R.INIVDTPGHADFGGEVER.I<br>R.HVPAPGLDENAPFTLALLDR.D<br>K.TTLVDQLFR.Q<br>R.GLIGYHGFELSDTR.G<br>R.GGYASDPPEAR.D<br>R.FAVNDSPMAGR.E<br>R.GLDRVPVDEAK.A<br>R.ILSMVDGVILLVDAEAGPMPQTK.F<br>R.GILFVSPGEALYEGMIIIGENAKPEDLEVNPMK.S<br>K.AGGIVAIAGLAQATVANTADTSVTEPIAAQPIDPPTLSMR.F<br>K.VNQPHALDMDGK.V<br>R.MTLEQAIYIDDEMVEVTPK.N<br>K.NGVLSISNGEAVAYALGLEER.G<br>R.AMDSNLEKER.G<br>K.VNQPHALDMDGKVIETGR.A<br>R.KNVGLSISNGEAVAYALGLEER.G<br>R.FAVNDSPMAGR.E<br>K.LVLEQITALNTTANIIDGTSK.M<br>R.VDGFIDDLVAQDVNSPAGQK.V<br>K.AAELDGVDPK.A<br>R.AFQNIYDMDAIDTFK.L<br>R.AEGAAQAQASVGGAESPLTAIEG.<br>K.TVTTLLEGEVAK.S<br>K.LFGSSVTNYFAK.Y<br>K.TAITVAQAMTNQK.L<br>K.LEQMVHIAQTLDR.K<br>R.IHEQAASSTIPMETLQR.A<br>R.SAQSHISSILITLANGKDELMDNAIDVER.R<br>R.KEMLEAANQSNR.F<br>K.EMLEAANQSNR.F<br>K.AMDRDTDIGQNLIELR.N<br>K.AAGLPLSTEQK.S<br>K.VDQITNMRG.K<br>K.KNNIELVK.G<br>K.AAELDGVDPKAK.V<br>R.TQDLTQMAYTVQGYLALDLVK.K<br>R.GLLDKLFGSSVTNYFAK.Y<br>R.DTDIGQNLIELR.N<br>K.VLRENALFYAR.Q<br>K.VQGLDGDGTGRQD.<br>R.LSASEAIER.S<br>R.TPDETLLVGLK.M<br>R.TEIVLEAQRPALPAPAR.Q<br>R.QLIDGIGVQLDLLAPQLQLDTPATAANIR.K<br>R.KLVGEDLPELVAGYQR.I<br>R.SLAAGELDKLATR.E<br>K.LVGEDLPELVAGYQR.I<br>R.VDIVINDFDVDTTATGDR.I<br>K.VAGMLGIEGGHSGSSLAVALR.E<br>R.ARVNVDINDFDVDTTATGDR.I<br>K.APVFDGHNDVPWALR.A<br>K.AMYPGDPAVAALTAWDAANPAPK.T<br>R.GHVGARQVSVVYVSTTNEAK.A<br>R.NVPWADSATDAPEHGLDFGR.Q<br>K.AVEFAASQK.G<br>R.YPADLMADNSAELEK.A<br>K.APVFMSHSGVR.A<br>R.VADHIDHLK.H<br>R.IGMIVDLSHVSEATHKDALAASK.A<br>K.AVQQTIEQIDVMKR.L<br>K.ANGGIVMVVFLRGLDADVR.A<br>R.RGYSQAELEK.I<br>K.KAPVFDGHNDVPWALR.A<br>K.AVQQTIEQIDVMKR.R<br>R.DRLPGTVLFMFPQEGEEHGGAR.F<br>R.IHIREPELGLQNR.P<br>R.VVENWFGEEAWLITMNDPVMGAEDFAYVLEK.V<br>R.GAALHAALAE.F<br>R.AGPLASSDVLSTIVK.G<br>K.IKDLAGLPLEFR.E<br>R.ISVFDPAVVTIAK.I<br>R.FLNEGFGQE.<br>K.ITAGTNNIIPETAEMLTIR.T<br>R.ATILASGGAGR.V<br>R.NLLETADLIVR.S<br>R.VTDSDEEVVVK.Q<br>R.VYQFSTAPR.G<br>R.HEVHEYSQFR.V<br>R.WDQLEPPAIR.A<br>R.VTTDLIELR.N<br>K.NFLTEAVR.G<br>R.LASNSLLECFVGEAAAK.D |
| YP_617334 | Sala_2292 | Leucyltransferase                              | 11.39%            | 2                       | R.LIAAGVKPQDR.I<br>R.GVEPLDWTAFAR.A<br>R.DEAGNPLDQTVGK.V<br>R.FSDFATVGEALDYAASGTR.G<br>R.AQYLAGEIQPFAIAA.<br>R.RFSDFATVGEALDYAASGTR.G<br>R.VAGNGADMIRPDVMQAFVDAFADAGFK.A<br>R.ISSQSIVADR.F<br>K.NHWQDIEWAVEQLPGFK.S<br>K.DMVEVDEAGNPLDQTVGK.V<br>R.ADALAAAYR.L<br>K.LAGEVEAWFEDVAGEEGAPAAD.<br>R.SPHFDLEVLQR.G                                                                                                                                                                                                                                                                                                                                                                                                                                                                                                                                                                                                                                                                                                                                                                                                                                                                                                                                                                                                                                                                                                                                                                                                                                                                                                                                                                                                                                                                                                                                                                                                                                                                                                                                                                                                                                                                                                                                                                                                                           |
| YP_617335 | Sala_2293 | NADH:ubiquinone oxidoreductase 17.2 kD subunit | 46.09%            | 3                       | R.VTNWLNSEDTSLLR.D<br>R.GIPAVPILVAVP.<br>K.YAFVAHDLVFK.H<br>R.RVTNWLSEDTSLLR.D<br>R.IVQYSHLNGFEFLK.Y<br>R.GLEPIMTYNQDFVK.D<br>R.LLSPDMNKEFAR.L<br>R.LFADHWTER.R<br>R.GLEPIMTYNQDFVKDR.V<br>R.DIMSLEPQAQK.E<br>R.GVTLNDGPTR.P<br>R.ATLSDYIDVPGVYPAGR.L<br>R.VLYQTDESQR.T<br>K.AALGLKRPVWVK.I<br>R.DGTLEPLFETIVR.H<br>R.ITESADKDSFEVAGR.G<br>R.INIVDTPGHADFGGEVER.I<br>R.HVPAPGLDENAPFTLALLDR.D<br>K.TTLVDQLFR.Q<br>R.GLIGYHGFELSDTR.G<br>R.GGYASDPPEAR.D<br>R.FAVNDSPMAGR.E<br>R.GLDRVPVDEAK.A<br>R.ILSMVDGVILLVDAEAGPMPQTK.F<br>R.GILFVSPGEALYEGMIIIGENAKPEDLEVNPMK.S<br>K.AGGIVAIAGLAQATVANTADTSVTEPIAAQPIDPPTLSMR.F<br>K.VNQPHALDMDGK.V<br>R.MTLEQAIYIDDEMVEVTPK.N<br>K.NGVLSISNGEAVAYALGLEER.G<br>R.AMDSNLEKER.G<br>K.VNQPHALDMDGKVIETGR.A<br>R.KNVGLSISNGEAVAYALGLEER.G<br>R.FAVNDSPMAGR.E<br>K.LVLEQITALNTTANIIDGTSK.M<br>R.VDGFIDDLVAQDVNSPAGQK.V<br>K.AAELDGVDPK.A<br>R.AFQNIYDMDAIDTFK.L<br>R.AEGAAQAQASVGGAESPLTAIEG.<br>K.TVTTLLEGEVAK.S<br>K.LFGSSVTNYFAK.Y<br>K.TAITVAQAMTNQK.L<br>K.LEQMVHIAQTLDR.K<br>R.IHEQAASSTIPMETLQR.A<br>R.SAQSHISSILITLANGKDELMDNAIDVER.R<br>R.KEMLEAANQSNR.F<br>K.EMLEAANQSNR.F<br>K.AMDRDTDIGQNLIELR.N<br>K.AAGLPLSTEQK.S<br>K.VDQITNMRG.K<br>K.KNNIELVK.G<br>K.AAELDGVDPKAK.V<br>R.TQDLTQMAYTVQGYLALDLVK.K<br>R.GLLDKLFGSSVTNYFAK.Y<br>R.DTDIGQNLIELR.N<br>K.VLRENALFYAR.Q<br>K.VQGLDGDGTGRQD.<br>R.LSASEAIER.S<br>R.TPDETLLVGLK.M<br>R.TEIVLEAQRPALPAPAR.Q<br>R.QLIDGIGVQLDLLAPQLQLDTPATAANIR.K<br>R.KLVGEDLPELVAGYQR.I<br>R.SLAAGELDKLATR.E<br>K.LVGEDLPELVAGYQR.I<br>R.VDIVINDFDVDTTATGDR.I<br>K.VAGMLGIEGGHSGSSLAVALR.E<br>R.ARVNVDINDFDVDTTATGDR.I<br>K.APVFDGHNDVPWALR.A<br>K.AMYPGDPAVAALTAWDAANPAPK.T<br>R.GHVGARQVSVVYVSTTNEAK.A<br>R.NVPWADSATDAPEHGLDFGR.Q<br>K.AVEFAASQK.G<br>R.YPADLMADNSAELEK.A<br>K.APVFMSHSGVR.A<br>R.VADHIDHLK.H<br>R.IGMIVDLSHVSEATHKDALAASK.A<br>K.AVQQTIEQIDVMKR.L<br>K.ANGGIVMVVFLRGLDADVR.A<br>R.RGYSQAELEK.I<br>K.KAPVFDGHNDVPWALR.A<br>K.AVQQTIEQIDVMKR.R<br>R.DRLPGTVLFMFPQEGEEHGGAR.F<br>R.IHIREPELGLQNR.P<br>R.VVENWFGEEAWLITMNDPVMGAEDFAYVLEK.V<br>R.GAALHAALAE.F<br>R.AGPLASSDVLSTIVK.G<br>K.IKDLAGLPLEFR.E<br>R.ISVFDPAVVTIAK.I<br>R.FLNEGFGQE.<br>K.ITAGTNNIIPETAEMLTIR.T<br>R.ATILASGGAGR.V<br>R.NLLETADLIVR.S<br>R.VTDSDEEVVVK.Q<br>R.VYQFSTAPR.G<br>R.HEVHEYSQFR.V<br>R.WDQLEPPAIR.A<br>R.VTTDLIELR.N<br>K.NFLTEAVR.G<br>R.LASNSLLECFVGEAAAK.D |
| YP_617337 | Sala_2295 | AMP-dependent synthetase and ligase            | 20.74%            | 13                      | R.VTNWLNSEDTSLLR.D<br>R.GIPAVPILVAVP.<br>K.YAFVAHDLVFK.H<br>R.RVTNWLSEDTSLLR.D<br>R.IVQYSHLNGFEFLK.Y<br>R.GLEPIMTYNQDFVK.D<br>R.LLSPDMNKEFAR.L<br>R.LFADHWTER.R<br>R.GLEPIMTYNQDFVKDR.V<br>R.DIMSLEPQAQK.E<br>R.GVTLNDGPTR.P<br>R.ATLSDYIDVPGVYPAGR.L<br>R.VLYQTDESQR.T<br>K.AALGLKRPVWVK.I<br>R.DGTLEPLFETIVR.H<br>R.ITESADKDSFEVAGR.G<br>R.INIVDTPGHADFGGEVER.I<br>R.HVPAPGLDENAPFTLALLDR.D<br>K.TTLVDQLFR.Q<br>R.GLIGYHGFELSDTR.G<br>R.GGYASDPPEAR.D<br>R.FAVNDSPMAGR.E<br>R.GLDRVPVDEAK.A<br>R.ILSMVDGVILLVDAEAGPMPQTK.F<br>R.GILFVSPGEALYEGMIIIGENAKPEDLEVNPMK.S<br>K.AGGIVAIAGLAQATVANTADTSVTEPIAAQPIDPPTLSMR.F<br>K.VNQPHALDMDGK.V<br>R.MTLEQAIYIDDEMVEVTPK.N<br>K.NGVLSISNGEAVAYALGLEER.G<br>R.AMDSNLEKER.G<br>K.VNQPHALDMDGKVIETGR.A<br>R.KNVGLSISNGEAVAYALGLEER.G<br>R.FAVNDSPMAGR.E<br>K.LVLEQITALNTTANIIDGTSK.M<br>R.VDGFIDDLVAQDVNSPAGQK.V<br>K.AAELDGVDPK.A<br>R.AFQNIYDMDAIDTFK.L<br>R.AEGAAQAQASVGGAESPLTAIEG.<br>K.TVTTLLEGEVAK.S<br>K.LFGSSVTNYFAK.Y<br>K.TAITVAQAMTNQK.L<br>K.LEQMVHIAQTLDR.K<br>R.IHEQAASSTIPMETLQR.A<br>R.SAQSHISSILITLANGKDELMDNAIDVER.R<br>R.KEMLEAANQSNR.F<br>K.EMLEAANQSNR.F<br>K.AMDRDTDIGQNLIELR.N<br>K.AAGLPLSTEQK.S<br>K.VDQITNMRG.K<br>K.KNNIELVK.G<br>K.AAELDGVDPKAK.V<br>R.TQDLTQMAYTVQGYLALDLVK.K<br>R.GLLDKLFGSSVTNYFAK.Y<br>R.DTDIGQNLIELR.N<br>K.VLRENALFYAR.Q<br>K.VQGLDGDGTGRQD.<br>R.LSASEAIER.S<br>R.TPDETLLVGLK.M<br>R.TEIVLEAQRPALPAPAR.Q<br>R.QLIDGIGVQLDLLAPQLQLDTPATAANIR.K<br>R.KLVGEDLPELVAGYQR.I<br>R.SLAAGELDKLATR.E<br>K.LVGEDLPELVAGYQR.I<br>R.VDIVINDFDVDTTATGDR.I<br>K.VAGMLGIEGGHSGSSLAVALR.E<br>R.ARVNVDINDFDVDTTATGDR.I<br>K.APVFDGHNDVPWALR.A<br>K.AMYPGDPAVAALTAWDAANPAPK.T<br>R.GHVGARQVSVVYVSTTNEAK.A<br>R.NVPWADSATDAPEHGLDFGR.Q<br>K.AVEFAASQK.G<br>R.YPADLMADNSAELEK.A<br>K.APVFMSHSGVR.A<br>R.VADHIDHLK.H<br>R.IGMIVDLSHVSEATHKDALAASK.A<br>K.AVQQTIEQIDVMKR.L<br>K.ANGGIVMVVFLRGLDADVR.A<br>R.RGYSQAELEK.I<br>K.KAPVFDGHNDVPWALR.A<br>K.AVQQTIEQIDVMKR.R<br>R.DRLPGTVLFMFPQEGEEHGGAR.F<br>R.IHIREPELGLQNR.P<br>R.VVENWFGEEAWLITMNDPVMGAEDFAYVLEK.V<br>R.GAALHAALAE.F<br>R.AGPLASSDVLSTIVK.G<br>K.IKDLAGLPLEFR.E<br>R.ISVFDPAVVTIAK.I<br>R.FLNEGFGQE.<br>K.ITAGTNNIIPETAEMLTIR.T<br>R.ATILASGGAGR.V<br>R.NLLETADLIVR.S<br>R.VTDSDEEVVVK.Q<br>R.VYQFSTAPR.G<br>R.HEVHEYSQFR.V<br>R.WDQLEPPAIR.A<br>R.VTTDLIELR.N<br>K.NFLTEAVR.G<br>R.LASNSLLECFVGEAAAK.D |
| YP_617340 | Sala_2298 | hypothetical protein                           | 37.08%            | 2                       | R.VTNWLNSEDTSLLR.D<br>R.GIPAVPILVAVP.<br>K.YAFVAHDLVFK.H<br>R.RVTNWLSEDTSLLR.D<br>R.IVQYSHLNGFEFLK.Y<br>R.GLEPIMTYNQDFVK.D<br>R.LLSPDMNKEFAR.L<br>R.LFADHWTER.R<br>R.GLEPIMTYNQDFVKDR.V<br>R.DIMSLEPQAQK.E<br>R.GVTLNDGPTR.P<br>R.ATLSDYIDVPGVYPAGR.L<br>R.VLYQTDESQR.T<br>K.AALGLKRPVWVK.I<br>R.DGTLEPLFETIVR.H<br>R.ITESADKDSFEVAGR.G<br>R.INIVDTPGHADFGGEVER.I<br>R.HVPAPGLDENAPFTLALLDR.D<br>K.TTLVDQLFR.Q<br>R.GLIGYHGFELSDTR.G<br>R.GGYASDPPEAR.D<br>R.FAVNDSPMAGR.E<br>R.GLDRVPVDEAK.A<br>R.ILSMVDGVILLVDAEAGPMPQTK.F<br>R.GILFVSPGEALYEGMIIIGENAKPEDLEVNPMK.S<br>K.AGGIVAIAGLAQATVANTADTSVTEPIAAQPIDPPTLSMR.F<br>K.VNQPHALDMDGK.V<br>R.MTLEQAIYIDDEMVEVTPK.N<br>K.NGVLSISNGEAVAYALGLEER.G<br>R.AMDSNLEKER.G<br>K.VNQPHALDMDGKVIETGR.A<br>R.KNVGLSISNGEAVAYALGLEER.G<br>R.FAVNDSPMAGR.E<br>K.LVLEQITALNTTANIIDGTSK.M<br>R.VDGFIDDLVAQDVNSPAGQK.V<br>K.AAELDGVDPK.A<br>R.AFQNIYDMDAIDTFK.L<br>R.AEGAAQAQASVGGAESPLTAIEG.<br>K.TVTTLLEGEVAK.S<br>K.LFGSSVTNYFAK.Y<br>K.TAITVAQAMTNQK.L<br>K.LEQMVHIAQTLDR.K<br>R.IHEQAASSTIPMETLQR.A<br>R.SAQSHISSILITLANGKDELMDNAIDVER.R<br>R.KEMLEAANQSNR.F<br>K.EMLEAANQSNR.F<br>K.AMDRDTDIGQNLIELR.N<br>K.AAGLPLSTEQK.S<br>K.VDQITNMRG.K<br>K.KNNIELVK.G<br>K.AAELDGVDPKAK.V<br>R.TQDLTQMAYTVQGYLALDLVK.K<br>R.GLLDKLFGSSVTNYFAK.Y<br>R.DTDIGQNLIELR.N<br>K.VLRENALFYAR.Q<br>K.VQGLDGDGTGRQD.<br>R.LSASEAIER.S<br>R.TPDETLLVGLK.M<br>R.TEIVLEAQRPALPAPAR.Q<br>R.QLIDGIGVQLDLLAPQLQLDTPATAANIR.K<br>R.KLVGEDLPELVAGYQR.I<br>R.SLAAGELDKLATR.E<br>K.LVGEDLPELVAGYQR.I<br>R.VDIVINDFDVDTTATGDR.I<br>K.VAGMLGIEGGHSGSSLAVALR.E<br>R.ARVNVDINDFDVDTTATGDR.I<br>K.APVFDGHNDVPWALR.A<br>K.AMYPGDPAVAALTAWDAANPAPK.T<br>R.GHVGARQVSVVYVSTTNEAK.A<br>R.NVPWADSATDAPEHGLDFGR.Q<br>K.AVEFAASQK.G<br>R.YPADLMADNSAELEK.A<br>K.APVFMSHSGVR.A<br>R.VADHIDHLK.H<br>R.IGMIVDLSHVSEATHKDALAASK.A<br>K.AVQQTIEQIDVMKR.L<br>K.ANGGIVMVVFLRGLDADVR.A<br>R.RGYSQAELEK.I<br>K.KAPVFDGHNDVPWALR.A<br>K.AVQQTIEQIDVMKR.R<br>R.DRLPGTVLFMFPQEGEEHGGAR.F<br>R.IHIREPELGLQNR.P<br>R.VVENWFGEEAWLITMNDPVMGAEDFAYVLEK.V<br>R.GAALHAALAE.F<br>R.AGPLASSDVLSTIVK.G<br>K.IKDLAGLPLEFR.E<br>R.ISVFDPAVVTIAK.I<br>R.FLNEGFGQE.<br>K.ITAGTNNIIPETAEMLTIR.T<br>R.ATILASGGAGR.V<br>R.NLLETADLIVR.S<br>R.VTDSDEEVVVK.Q<br>R.VYQFSTAPR.G<br>R.HEVHEYSQFR.V<br>R.WDQLEPPAIR.A<br>R.VTTDLIELR.N<br>K.NFLTEAVR.G<br>R.LASNSLLECFVGEAAAK.D |
| YP_617343 | Sala_2301 | hypothetical protein                           | 52.22%            | 10                      | R.VTNWLNSEDTSLLR.D<br>R.GIPAVPILVAVP.<br>K.YAFVAHDLVFK.H<br>R.RVTNWLSEDTSLLR.D<br>R.IVQYSHLNGFEFLK.Y<br>R.GLEPIMTYNQDFVK.D<br>R.LLSPDMNKEFAR.L<br>R.LFADHWTER.R<br>R.GLEPIMTYNQDFVKDR.V<br>R.DIMSLEPQAQK.E<br>R.GVTLNDGPTR.P<br>R.ATLSDYIDVPGVYPAGR.L<br>R.VLYQTDESQR.T<br>K.AALGLKRPVWVK.I<br>R.DGTLEPLFETIVR.H<br>R.ITESADKDSFEVAGR.G<br>R.INIVDTPGHADFGGEVER.I<br>R.HVPAPGLDENAPFTLALLDR.D<br>K.TTLVDQLFR.Q<br>R.GLIGYHGFELSDTR.G<br>R.GGYASDPPEAR.D<br>R.FAVNDSPMAGR.E<br>R.GLDRVPVDEAK.A<br>R.ILSMVDGVILLVDAEAGPMPQTK.F<br>R.GILFVSPGEALYEGMIIIGENAKPEDLEVNPMK.S<br>K.AGGIVAIAGLAQATVANTADTSVTEPIAAQPIDPPTLSMR.F<br>K.VNQPHALDMDGK.V<br>R.MTLEQAIYIDDEMVEVTPK.N<br>K.NGVLSISNGEAVAYALGLEER.G<br>R.AMDSNLEKER.G<br>K.VNQPHALDMDGKVIETGR.A<br>R.KNVGLSISNGEAVAYALGLEER.G<br>R.FAVNDSPMAGR.E<br>K.LVLEQITALNTTANIIDGTSK.M<br>R.VDGFIDDLVAQDVNSPAGQK.V<br>K.AAELDGVDPK.A<br>R.AFQNIYDMDAIDTFK.L<br>R.AEGAAQAQASVGGAESPLTAIEG.<br>K.TVTTLLEGEVAK.S<br>K.LFGSSVTNYFAK.Y<br>K.TAITVAQAMTNQK.L<br>K.LEQMVHIAQTLDR.K<br>R.IHEQAASSTIPMETLQR.A<br>R.SAQSHISSILITLANGKDELMDNAIDVER.R<br>R.KEMLEAANQSNR.F<br>K.EMLEAANQSNR.F<br>K.AMDRDTDIGQNLIELR.N<br>K.AAGLPLSTEQK.S<br>K.VDQITNMRG.K<br>K.KNNIELVK.G<br>K.AAELDGVDPKAK.V<br>R.TQDLTQMAYTVQGYLALDLVK.K<br>R.GLLDKLFGSSVTNYFAK.Y<br>R.DTDIGQNLIELR.N<br>K.VLRENALFYAR.Q<br>K.VQGLDGDGTGRQD.<br>R.LSASEAIER.S<br>R.TPDETLLVGLK.M<br>R.TEIVLEAQRPALPAPAR.Q<br>R.QLIDGIGVQLDLLAPQLQLDTPATAANIR.K<br>R.KLVGEDLPELVAGYQR.I<br>R.SLAAGELDKLATR.E<br>K.LVGEDLPELVAGYQR.I<br>R.VDIVINDFDVDTTATGDR.I<br>K.VAGMLGIEGGHSGSSLAVALR.E<br>R.ARVNVDINDFDVDTTATGDR.I<br>K.APVFDGHNDVPWALR.A<br>K.AMYPGDPAVAALTAWDAANPAPK.T<br>R.GHVGARQVSVVYVSTTNEAK.A<br>R.NVPWADSATDAPEHGLDFGR.Q<br>K.AVEFAASQK.G<br>R.YPADLMADNSAELEK.A<br>K.APVFMSHSGVR.A<br>R.VADHIDHLK.H<br>R.IGMIVDLSHVSEATHKDALAASK.A<br>K.AVQQTIEQIDVMKR.L<br>K.ANGGIVMVVFLRGLDADVR.A<br>R.RGYSQAELEK.I<br>K.KAPVFDGHNDVPWALR.A<br>K.AVQQTIEQIDVMKR.R<br>R.DRLPGTVLFMFPQEGEEHGGAR.F<br>R.IHIREPELGLQNR.P<br>R.VVENWFGEEAWLITMNDPVMGAEDFAYVLEK.V<br>R.GAALHAALAE.F<br>R.AGPLASSDVLSTIVK.G<br>K.IKDLAGLPLEFR.E<br>R.ISVFDPAVVTIAK.I<br>R.FLNEGFGQE.<br>K.ITAGTNNIIPETAEMLTIR.T<br>R.ATILASGGAGR.V<br>R.NLLETADLIVR.S<br>R.VTDSDEEVVVK.Q<br>R.VYQFSTAPR.G<br>R.HEVHEYSQFR.V<br>R.WDQLEPPAIR.A<br>R.VTTDLIELR.N<br>K.NFLTEAVR.G<br>R.LASNSLLECFVGEAAAK.D |
| YP_617344 | Sala_2302 | Pseudouridine synthase, Rsu                    | 14.59%            | 2                       | R.VTNWLNSEDTSLLR.D<br>R.GIPAVPILVAVP.<br>K.YAFVAHDLVFK.H<br>R.RVTNWLSEDTSLLR.D<br>R.IVQYSHLNGFEFLK.Y<br>R.GLEPIMTYNQDFVK.D<br>R.LLSPDMNKEFAR.L<br>R.LFADHWTER.R<br>R.GLEPIMTYNQDFVKDR.V<br>R.DIMSLEPQAQK.E<br>R.GVTLNDGPTR.P<br>R.ATLSDYIDVPGVYPAGR.L<br>R.VLYQTDESQR.T<br>K.AALGLKRPVWVK.I<br>R.DGTLEPLFETIVR.H<br>R.ITESADKDSFEVAGR.G<br>R.INIVDTPGHADFGGEVER.I<br>R.HVPAPGLDENAPFTLALLDR.D<br>K.TTLVDQLFR.Q<br>R.GLIGYHGFELSDTR.G<br>R.GGYASDPPEAR.D<br>R.FAVNDSPMAGR.E<br>R.GLDRVPVDEAK.A<br>R.ILSMVDGVILLVDAEAGPMPQTK.F<br>R.GILFVSPGEALYEGMIIIGENAKPEDLEVNPMK.S<br>K.AGGIVAIAGLAQATVANTADTSVTEPIAAQPIDPPTLSMR.F<br>K.VNQPHALDMDGK.V<br>R.MTLEQAIYIDDEMVEVTPK.N<br>K.NGVLSISNGEAVAYALGLEER.G<br>R.AMDSNLEKER.G<br>K.VNQPHALDMDGKVIETGR.A<br>R.KNVGLSISNGEAVAYALGLEER.G<br>R.FAVNDSPMAGR.E<br>K.LVLEQITALNTTANIIDGTSK.M<br>R.VDGFIDDLVAQDVNSPAGQK.V<br>K.AAELDGVDPK.A<br>R.AFQNIYDMDAIDTFK.L<br>R.AEGAAQAQASVGGAESPLTAIEG.<br>K.TVTTLLEGEVAK.S<br>K.LFGSSVTNYFAK.Y<br>K.TAITVAQAMTNQK.L<br>K.LEQMVHIAQTLDR.K<br>R.IHEQAASSTIPMETLQR.A<br>R.SAQSHISSILITLANGKDELMDNAIDVER.R<br>R.KEMLEAANQSNR.F<br>K.EMLEAANQSNR.F<br>K.AMDRDTDIGQNLIELR.N<br>K.AAGLPLSTEQK.S<br>K.VDQITNMRG.K<br>K.KNNIELVK.G<br>K.AAELDGVDPKAK.V<br>R.TQDLTQMAYTVQGYLALDLVK.K<br>R.GLLDKLFGSSVTNYFAK.Y<br>R.DTDIGQNLIELR.N<br>K.VLRENALFYAR.Q<br>K.VQGLDGDGTGRQD.<br>R.LSASEAIER.S<br>R.TPDETLLVGLK.M<br>R.TEIVLEAQRPALPAPAR.Q<br>R.QLIDGIGVQLDLLAPQLQLDTPATAANIR.K<br>R.KLVGEDLPELVAGYQR.I<br>R.SLAAGELDKLATR.E<br>K.LVGEDLPELVAGYQR.I<br>R.VDIVINDFDVDTTATGDR.I<br>K.VAGMLGIEGGHSGSSLAVALR.E<br>R.ARVNVDINDFDVDTTATGDR.I<br>K.APVFDGHNDVPWALR.A<br>K.AMYPGDPAVAALTAWDAANPAPK.T<br>R.GHVGARQVSVVYVSTTNEAK.A<br>R.NVPWADSATDAPEHGLDFGR.Q<br>K.AVEFAASQK.G<br>R.YPADLMADNSAELEK.A<br>K.APVFMSHSGVR.A<br>R.VADHIDHLK.H<br>R.IGMIVDLSHVSEATHKDALAASK.A<br>K.AVQQTIEQIDVMKR.L<br>K.ANGGIVMVVFLRGLDADVR.A<br>R.RGYSQAELEK.I<br>K.KAPVFDGHNDVPWALR.A<br>K.AVQQTIEQIDVMKR.R<br>R.DRLPGTVLFMFPQEGEEHGGAR.F<br>R.IHIREPELGLQNR.P<br>R.VVENWFGEEAWLITMNDPVMGAEDFAYVLEK.V<br>R.GAALHAALAE.F<br>R.AGPLASSDVLSTIVK.G<br>K.IKDLAGLPLEFR.E<br>R.ISVFDPAVVTIAK.I<br>R.FLNEGFGQE.<br>K.ITAGTNNIIPETAEMLTIR.T<br>R.ATILASGGAGR.V<br>R.NLLETADLIVR.S<br>R.VTDSDEEVVVK.Q<br>R.VYQFSTAPR.G<br>R.HEVHEYSQFR.V<br>R.WDQLEPPAIR.A<br>R.VTTDLIELR.N<br>K.NFLTEAVR.G<br>R.LASNSLLECFVGEAAAK.D |
| YP_617345 | Sala_2303 | GTP-binding protein TypA                       | 52.46%            | 21                      | R.VTNWLNSEDTSLLR.D<br>R.GIPAVPILVAVP.<br>K.YAFVAHDLVFK.H<br>R.RVTNWLSEDTSLLR.D<br>R.IVQYSHLNGFEFLK.Y<br>R.GLEPIMTYNQDFVK.D<br>R.LLSPDMNKEFAR.L<br>R.LFADHWTER.R<br>R.GLEPIMTYNQDFVKDR.V<br>R.DIMSLEPQAQK.E<br>R.GVTLNDGPTR.P<br>R.ATLSDYIDVPGVYPAGR.L<br>R.VLYQTDESQR.T<br>K.AALGLKRPVWVK.I<br>R.DGTLEPLFETIVR.H<br>R.ITESADKDSFEVAGR.G<br>R.INIVDTPGHADFGGEVER.I<br>R.HVPAPGLDENAPFTLALLDR.D<br>K.TTLVDQLFR.Q<br>R.GLIGYHGFELSDTR.G<br>R.GGYASDPPEAR.D<br>R.FAVNDSPMAGR.E<br>R.GLDRVPVDEAK.A<br>R.ILSMVDGVILLVDAEAGPMPQTK.F<br>R.GILFVSPGEALYEGMIIIGENAKPEDLEVNPMK.S<br>K.AGGIVAIAGLAQATVANTADTSVTEPIAAQPIDPPTLSMR.F<br>K.VNQPHALDMDGK.V<br>R.MTLEQAIYIDDEMVEVTPK.N<br>K.NGVLSISNGEAVAYALGLEER.G<br>R.AMDSNLEKER.G<br>K.VNQPHALDMDGKVIETGR.A<br>R.KNVGLSISNGEAVAYALGLEER.G<br>R.FAVNDSPMAGR.E<br>K.LVLEQITALNTTANIIDGTSK.M<br>R.VDGFIDDLVAQDVNSPAGQK.V<br>K.AAELDGVDPK.A<br>R.AFQNIYDMDAIDTFK.L<br>R.AEGAAQAQASVGGAESPLTAIEG.<br>K.TVTTLLEGEVAK.S<br>K.LFGSSVTNYFAK.Y<br>K.TAITVAQAMTNQK.L<br>K.LEQMVHIAQTLDR.K<br>R.IHEQAASSTIPMETLQR.A<br>R.SAQSHISSILITLANGKDELMDNAIDVER.R<br>R.KEMLEAANQSNR.F<br>K.EMLEAANQSNR.F<br>K.AMDRDTDIGQNLIELR.N<br>K.AAGLPLSTEQK.S<br>K.VDQITNMRG.K<br>K.KNNIELVK.G<br>K.AAELDGVDPKAK.V<br>R.TQDLTQMAYTVQGYLALDLVK.K<br>R.GLLDKLFGSSVTNYFAK.Y<br>R.DTDIGQNLIELR.N<br>K.VLRENALFYAR.Q<br>K.VQGLDGDGTGRQD.<br>R.LSASEAIER.S<br>R.TPDETLLVGLK.M<br>R.TEIVLEAQRPALPAPAR.Q<br>R.QLIDGIGVQLDLLAPQLQLDTPATAANIR.K<br>R.KLVGEDLPELVAGYQR.I<br>R.SLAAGELDKLATR.E<br>K.LVGEDLPELVAGYQR.I<br>R.VDIVINDFDVDTTATGDR.I<br>K.VAGMLGIEGGHSGSSLAVALR.E<br>R.ARVNVDINDFDVDTTATGDR.I<br>K.APVFDGHNDVPWALR.A<br>K.AMYPGDPAVAALTAWDAANPAPK.T<br>R.GHVGARQVSVVYVSTTNEAK.A<br>R.NVPWADSATDAPEHGLDFGR.Q<br>K.AVEFAASQK.G<br>R.YPADLMADNSAELEK.A<br>K.APVFMSHSGVR.A<br>R.VADHIDHLK.H<br>R.IGMIVDLSHVSEATHKDALAASK.A<br>K.AVQQTIEQIDVMKR.L<br>K.ANGGIVMVVFLRGLDADVR.A<br>R.RGYSQAELEK.I<br>K.KAPVFDGHNDVPWALR.A<br>K.AVQQTIEQIDVMKR.R<br>R.DRLPGTVLFMFPQEGEEHGGAR.F<br>R.IHIREPELGLQNR.P<br>R.VVENWFGEEAWLITMNDPVMGAEDFAYVLEK.V<br>R.GAALHAALAE.F<br>R.AGPLASSDVLSTIVK.G<br>K.IKDLAGLPLEFR.E<br>R.ISVFDPAVVTIAK.I<br>R.FLNEGFGQE.<br>K.ITAGTNNIIPETAEMLTIR.T<br>R.ATILASGGAGR.V<br>R.NLLETADLIVR.S<br>R.VTDSDEEVVVK.Q<br>R.VYQFSTAPR.G<br>R.HEVHEYSQFR.V<br>R.WDQLEPPAIR.A<br>R.VTTDLIELR.N<br>K.NFLTEAVR.G<br>R.LASNSLLECFVGEAAAK.D |
| YP_617350 | Sala_2308 | toxic anion resistance                         | 71.46%            | 22                      | R.VTNWLNSEDTSLLR.D<br>R.GIPAVPILVAVP.<br>K.YAFVAHDLVFK.H<br>R.RVTNWLSEDTSLLR.D<br>R.IVQYSHLNGFEFLK.Y<br>R.GLEPIMTYNQDFVK.D<br>R.LLSPDMNKEFAR.L<br>R.LFADHWTER.R<br>R.GLEPIMTYNQDFVKDR.V<br>R.DIMSLEPQAQK.E<br>R.GVTLNDGPTR.P<br>R.ATLSDYIDVPGVYPAGR.L<br>R.VLYQTDESQR.T<br>K.AALGLKRPVWVK.I<br>R.DGTLEPLFETIVR.H<br>R.ITESADKDSFEVAGR.G<br>R.INIVDTPGHADFGGEVER.I<br>R.HVPAPGLDENAPFTLALLDR.D<br>K.TTLVDQLFR.Q<br>R.GLIGYHGFELSDTR.G<br>R.GGYASDPPEAR.D<br>R.FAVNDSPMAGR.E<br>R.GLDRVPVDEAK.A<br>R.ILSMVDGVILLVDAEAGPMPQTK.F<br>R.GILFVSPGEALYEGMIIIGENAKPEDLEVNPMK.S<br>K.AGGIVAIAGLAQATVANTADTSVTEPIAAQPIDPPTLSMR.F<br>K.VNQPHALDMDGK.V<br>R.MTLEQAIYIDDEMVEVTPK.N<br>K.NGVLSISNGEAVAYALGLEER.G<br>R.AMDSNLEKER.G<br>K.VNQPHALDMDGKVIETGR.A<br>R.KNVGLSISNGEAVAYALGLEER.G<br>R.FAVNDSPMAGR.E<br>K.LVLEQITALNTTANIIDGTSK.M<br>R.VDGFIDDLVAQDVNSPAGQK.V<br>K.AAELDGVDPK.A<br>R.AFQNIYDMDAIDTFK.L<br>R.AEGAAQAQASVGGAESPLTAIEG.<br>K.TVTTLLEGEVAK.S<br>K.LFGSSVTNYFAK.Y<br>K.TAITVAQAMTNQK.L<br>K.LEQMVHIAQTLDR.K<br>R.IHEQAASSTIPMETLQR.A<br>R.SAQSHISSILITLANGKDELMDNAIDVER.R<br>R.KEMLEAANQSNR.F<br>K.EMLEAANQSNR.F<br>K.AMDRDTDIGQNLIELR.N<br>K.AAGLPLSTEQK.S<br>K.VDQITNMRG.K<br>K.KNNIELVK.G<br>K.AAELDGVDPKAK.V<br>R.TQDLTQMAYTVQGYLALDLVK.K<br>R.GLLDKLFGSSVTNYFAK.Y<br>R.DTDIGQNLIELR.N<br>K.VLRENALFYAR.Q<br>K.VQGLDGDGTGRQD.<br>R.LSASEAIER.S<br>R.TPDETLLVGLK.M<br>R.TEIVLEAQRPALPAPAR.Q<br>R.QLIDGIGVQLDLLAPQLQLDTPATAANIR.K<br>R.KLVGEDLPELVAGYQR.I<br>R.SLAAGELDKLATR.E<br>K.LVGEDLPELVAGYQR.I<br>R.VDIVINDFDVDTTATGDR.I<br>K.VAGMLGIEGGHSGSSLAVALR.E<br>R.ARVNVDINDFDVDTTATGDR.I<br>K.APVFDGHNDVPWALR.A<br>K.AMYPGDPAVAALTAWDAANPAPK.T<br>R.GHVGARQVSVVYVSTTNEAK.A<br>R.NVPWADSATDAPEHGLDFGR.Q<br>K.AVEFAASQK.G<br>R.YPADLMADNSAELEK.A<br>K.APVFMSHSGVR.A<br>R.VADHIDHLK.H<br>R.IGMIVDLSHVSEATHKDALAASK.A<br>K.AVQQTIEQIDVMKR.L<br>K.ANGGIVMVVFLRGLDADVR.A<br>R.RGYSQAELEK.I<br>K.KAPVFDGHNDVPWALR.A<br>K.AVQQTIEQIDVMKR.R<br>R.DRLPGTVLFMFPQEGEEHGGAR.F<br>R.IHIREPELGLQNR.P<br>R.VVENWFGEEAWLITMNDPVMGAEDFAYVLEK.V<br>R.GAALHAALAE.F<br>R.AGPLASSDVLSTIVK.G<br>K.IKDLAGLPLEFR.E<br>R.ISVFDPAVVTIAK.I<br>R.FLNEGFGQE.<br>K.ITAGTNNIIPETAEMLTIR.T<br>R.ATILASGGAGR.V<br>R.NLLETADLIVR.S<br>R.VTDSDEEVVVK.Q<br>R.VYQFSTAPR.G<br>R.HEVHEYSQFR.V<br>R.WDQLEPPAIR.A<br>R.VTTDLIELR.N<br>K.NFLTEAVR.G<br>R.LASNSLLECFVGEAAAK.D |
| YP_617351 | Sala_2309 | hypothetical protein                           | 45.49%            | 8                       | R.VTNWLNSEDTSLLR.D<br>R.GIPAVPILVAVP.<br>K.YAFVAHDLVFK.H<br>R.RVTNWLSEDTSLLR.D<br>R.IVQYSHLNGFEFLK.Y<br>R.GLEPIMTYNQDFVK.D<br>R.LLSPDMNKEFAR.L<br>R.LFADHWTER.R<br>R.GLEPIMTYNQDFVKDR.V<br>R.DIMSLEPQAQK.E<br>R.GVTLNDGPTR.P<br>R.ATLSDYIDVPGVYPAGR.L<br>R.VLYQTDESQR.T<br>K.AALGLKRPVWVK.I<br>R.DGTLEPLFETIVR.H<br>R.ITESADKDSFEVAGR.G<br>R.INIVDTPGHADFGGEVER.I<br>R.HVPAPGLDENAPFTLALLDR.D<br>K.TTLVDQLFR.Q<br>R.GLIGYHGFELSDTR.G<br>R.GGYASDPPEAR.D<br>R.FAVNDSPMAGR.E<br>R.GLDRVPVDEAK.A<br>R.ILSMVDGVILLVDAEAGPMPQTK.F<br>R.GILFVSPGEALYEGMIIIGENAKPEDLEVNPMK.S<br>K.AGGIVAIAGLAQATVANTADTSVTEPIAAQPIDPPTLSMR.F<br>K.VNQPHALDMDGK.V<br>R.MTLEQAIYIDDEMVEVTPK.N<br>K.NGVLSISNGEAVAYALGLEER.G<br>R.AMDSNLEKER.G<br>K.VNQPHALDMDGKVIETGR.A<br>R.KNVGLSISNGEAVAYALGLEER.G<br>R.FAVNDSPMAGR.E<br>K.LVLEQITALNTTANIIDGTSK.M<br>R.VDGFIDDLVAQDVNSPAGQK.V<br>K.AAELDGVDPK.A<br>R.AFQNIYDMDAIDTFK.L<br>R.AEGAAQAQASVGGAESPLTAIEG.<br>K.TVTTLLEGEVAK.S<br>K.LFGSSVTNYFAK.Y<br>K.TAITVAQAMTNQK.L<br>K.LEQMVHIAQTLDR.K<br>R.IHEQAASSTIPMETLQR.A<br>R.SAQSHISSILITLANGKDELMDNAIDVER.R<br>R.KEMLEAANQSNR.F<br>K.EMLEAANQSNR.F<br>K.AMDRDTDIGQNLIELR.N<br>K.AAGLPLSTEQK.S<br>K.VDQITNMRG.K<br>K.KNNIELVK.G<br>K.AAELDGVDPKAK.V<br>R.TQDLTQMAYTVQGYLALDLVK.K<br>R.GLLDKLFGSSVTNYFAK.Y<br>R.DTDIGQNLIELR.N<br>K.VLRENALFYAR.Q<br>K.VQGLDGDGTGRQD.<br>R.LSASEAIER.S<br>R.TPDETLLVGLK.M<br>                                                                                                                                                                                                                                                                                                                                                                                                                                                                                                                                                                                                                                                                                                                                                                                                                                                                                                                                                           |

| Accession | Locus tag | Description                                         | Sequence coverage | No. peptides identified | List of peptides identified                                                                                                                                                                                                                                                                                                                                                                                                                                                                                                                                                                                                                                                                                                                                                                                                                                                                                                                                                                                                                                                                                                                                                                                                                                                                                                                                                                                                                                                                                                                                                                                                                                                                                                                                                                                                                                                                                                                                                                                                                                                                                                                                                                                                                                                                                                                                                                                                                                                                                                                                                                                                                                                                                                                                                                                                                                                                                                                                                                                                                                                                                                                                                                                                                                                                                                                                      |
|-----------|-----------|-----------------------------------------------------|-------------------|-------------------------|------------------------------------------------------------------------------------------------------------------------------------------------------------------------------------------------------------------------------------------------------------------------------------------------------------------------------------------------------------------------------------------------------------------------------------------------------------------------------------------------------------------------------------------------------------------------------------------------------------------------------------------------------------------------------------------------------------------------------------------------------------------------------------------------------------------------------------------------------------------------------------------------------------------------------------------------------------------------------------------------------------------------------------------------------------------------------------------------------------------------------------------------------------------------------------------------------------------------------------------------------------------------------------------------------------------------------------------------------------------------------------------------------------------------------------------------------------------------------------------------------------------------------------------------------------------------------------------------------------------------------------------------------------------------------------------------------------------------------------------------------------------------------------------------------------------------------------------------------------------------------------------------------------------------------------------------------------------------------------------------------------------------------------------------------------------------------------------------------------------------------------------------------------------------------------------------------------------------------------------------------------------------------------------------------------------------------------------------------------------------------------------------------------------------------------------------------------------------------------------------------------------------------------------------------------------------------------------------------------------------------------------------------------------------------------------------------------------------------------------------------------------------------------------------------------------------------------------------------------------------------------------------------------------------------------------------------------------------------------------------------------------------------------------------------------------------------------------------------------------------------------------------------------------------------------------------------------------------------------------------------------------------------------------------------------------------------------------------------------------|
| YP_617358 | Sala_2316 | ABC transporter related                             | 65.15%            | 13                      | R.IVHVDATGWAVQAALLK.T<br>R.GATGDGIAMAWR.A<br>K.TAEAHNTLLPQACIDLITGR.H<br>R.EADLEDFNLTRA<br>K.STLNLGLAVLNK.T<br>R.QQLWDYVQSLNDR.G<br>R.GEIFGLLNGGAGK.S<br>K.QALDNVDFVPR.G<br>R.MNAGVLAAVNAMGHGIVDVSTR.E<br>R.ISDELLAAVHLSKRR.D<br>K.IVVVTLHDHITDLPHPAFKIER.E<br>K.YSIGIVQEVDFPFFPYETLENQAGLYGVPK.A<br>K.TSGHAIWGFIDADPR.N<br>K.QALDNVDFVPRGEIFGLLGNPAGK.S<br>K.IVVVTLHDHITDLPHPAFK.I<br>K.AMWHSPPIVLDPTAGVDIELR.Q<br>R.TSGVTLVGGGAPAR.F<br>R.QVDISLGSNAIWTGPGTR.M<br>R.HLYDEANPLDLPFAK.K<br>R.AIDDEALSQUALVNL.R.A<br>K.GATLIGDGPVLT.K.V<br>R.GSLSIDDEGTPTGETVLIEDGILK.G<br>R.RGSLSIDDEGTPTGETVLIEDGILK.G<br>K.SFGGGQVDIVSGK.F<br>R.GGRDDPAELLSR.V<br>K.AGQSVPAVGQPTLLVSLTVGGTA.<br>R.ADALDPLAQK.L<br>K.ADDGELYLQYR.A<br>K.TADYSTDAGFLR.A<br>R.YMYDHLFEEAQWNR.A<br>R.VAAGVTVDDGAMESPVGGGR.R<br>R.RAAETLALLDPAK.Q<br>R.KGTSAFSGR.I<br>R.AVDAPAGEFTVLLGPGWPGVLLHEAVHGLEGDFNR.K<br>R.ATESFGFDDGR.L<br>R.AVSGEMTGFHAASDISADAIR.R<br>R.ATESFGFDDGR.LK.T<br>R.AAETLALLDPAK.Q<br>R.YMYDHLFEEAQWNR.A<br>R.LMGVEPTGNRR.R<br>R.ADGFLATDIRPLVR.L<br>K.FVFSCTEAYK.I<br>R.AGPGQPVVIDFAK.V<br>K.VAAGQVPPNFTSTVPR.I<br>R.SQPADAFITDPDTALAAALFDQVPR.N<br>R.ATRPEEEAIEEGR.N<br>R.GHADAFAFDLSLAR.A<br>R.LLAFWFDR.H<br>R.DLAEHWHQALR.S<br>K.HFDIVDR.F<br>R.VVETLQQSAGTSGIGDGK.I<br>K.IFVLDVGGAVR.I<br>R.VVETLQQSAGTSGIGDGKIFVLDVGGQAVR.I<br>R.EALITGLIAGMTVTEVK.G<br>K.LILAIIKPKF.L<br>R.YTQPADQENNR.T<br>R.LPTPGDAVTDATLGAAGSAGAR.N<br>R.VASDNDGPPQWLGGFYSK.I<br>R.EAFEDETLADIK.I<br>R.GPGTLFGSGSVGTR.Y<br>R.NVAGLSVQNLGPGQSQSVVR.G<br>R.IALTPEPDSLSITPR.I<br>R.NGFGPDSPNADLPYDIK.Q<br>R.DANLQDIPFSINAQTAEDIQK.S<br>R.YGGFINAIGPAGK.E<br>K.IVDGLGATLSVTSYINR.D<br>R.GFTFNAAGFYNDIK.N<br>R.YGGFINAIGPAGKEDVNSGER.Y<br>R.SFVSGGLFANGDNR.T<br>K.SGAVTLEDLSR.N<br>K.GAVWPMGDNALR.A<br>K.FQLTASSEYEWPGDR.A<br>R.SFVSGGLFANGDNRDSTK.S<br>R.LGYTVGQPR.T<br>R.QEIVNLYANQFTTTR.P<br>K.IGVMEGSVEANLNVDDIGGHLK.G<br>R.YITNPK.I<br>R.GVSAGQVVR.D<br>R.ANMYVAASFQHVGR.Y<br>K.VTADGFNRQEIVNLYANQFTTTR.P<br>K.QFAIFGEISYDLNDALTATAGGR.Y<br>R.AGEDVGAIVEAAK.A<br>R.STHLWALAR.A<br>R.AASLTSVODAFDTR.Q<br>R.LLRLLDADFVPR.L<br>R.DGDPAEALMLWAADFAR.A<br>R.GIEHVLQVEDADELKAVYGR.L<br>K.SIAFYSGLFGAAPSVTKPDYAK.W<br>K.NPPVLLDEATSALDSR.T<br>R.FEAIQDTER.I<br>R.IILDQQDISQVQASLR.A<br>R.GPDGNPVAGGTGGR.V<br>R.LDATGVTVVKGDSEAR.G<br>R.VTQAGLVVAPR.M<br>R.VTGTFTVPER.K<br>R.LITHWGNVELR.Q<br>R.AGCTDVRWLDATGGVTVVK.G<br>R.ADRVLAGNVR.V<br>R.LVIDLNSGR.A<br>R.LDASNVAVDLNTR.R<br>K.GQPFALLAGSAVQK.S<br>R.LIGTGVEGALNIGQFSANALSADLDRK.I<br>R.FRRSSYDAPVLLK.A<br>K.QQSSDWGAELSEAQR.D<br>R.AALDLAGWPEVDIFAHS.<br>K.AILADPERLK.L<br>R.DYAAASDVR.F<br>R.FLHAMKELDAR.L<br>R.TELAQACDFLPR.A<br>R.LCLVQISDGSDEHLVR.F<br>R.FDIAALQQALGVVTPVYCTK.I<br>R.ELLGQEVSK.Q<br>R.DDQADAFVHISAVQR.A<br>R.DDFGNFDSFEPAPYGGDSYGGGR.G<br>K.FAANLQPHQD.<br>R.GGGMPAQVVEGQGTVK.F<br>R.DDGEDVHVHISAVEQAGLQGLASQPLAFTLVER.N<br>R.GGGGGGDRGGGFGGGR.G<br>K.RDDFGNDFSFPAPYGGDSYGGGR.G<br>K.IEGEPMPEEFAPR.Q<br>R.GGFAGGDRGGGFGGGR.G<br>R.VAFDIEVDRGK.F<br>R.GGGMPAQVVEGQGTVK.F<br>R.DDGEDVHVHISAVEQAGLQGLASQPLAFTLVERNGK.V<br>K.IEGEPMPEEFAPR.Q<br>R.VAFDIEVDDR.G<br>R.AGMAGLEEDRVAFDIEVDRGK.F<br>R.AGMAGLEEDR.V<br>K.VSAIDLKIEGEMPEEFAPR.Q<br>R.HGSWAASPTIDYGTPLSK.R<br>R.YYDIDPADSASGLPVYDGAGK.K<br>R.GTNFQVDLIR.Q<br>R.DYFAAAGVLSLTPYNGADRR.L<br>K.IDDPPVAALGR.R<br>R.AYDQVHVHIAIQLNLPVR.F<br>R.DSDHPVLHVAITK.K<br>K.APPGPPYQVFGETLAK.L |
| YP_617359 | Sala_2317 | hypothetical protein                                | 18.28%            | 2                       |                                                                                                                                                                                                                                                                                                                                                                                                                                                                                                                                                                                                                                                                                                                                                                                                                                                                                                                                                                                                                                                                                                                                                                                                                                                                                                                                                                                                                                                                                                                                                                                                                                                                                                                                                                                                                                                                                                                                                                                                                                                                                                                                                                                                                                                                                                                                                                                                                                                                                                                                                                                                                                                                                                                                                                                                                                                                                                                                                                                                                                                                                                                                                                                                                                                                                                                                                                  |
| YP_617361 | Sala_2319 | peptidase U62, modulator of DNA gyrase              | 66.04%            | 24                      |                                                                                                                                                                                                                                                                                                                                                                                                                                                                                                                                                                                                                                                                                                                                                                                                                                                                                                                                                                                                                                                                                                                                                                                                                                                                                                                                                                                                                                                                                                                                                                                                                                                                                                                                                                                                                                                                                                                                                                                                                                                                                                                                                                                                                                                                                                                                                                                                                                                                                                                                                                                                                                                                                                                                                                                                                                                                                                                                                                                                                                                                                                                                                                                                                                                                                                                                                                  |
| YP_617362 | Sala_2320 | hypothetical protein                                | 7.30%             | 2                       |                                                                                                                                                                                                                                                                                                                                                                                                                                                                                                                                                                                                                                                                                                                                                                                                                                                                                                                                                                                                                                                                                                                                                                                                                                                                                                                                                                                                                                                                                                                                                                                                                                                                                                                                                                                                                                                                                                                                                                                                                                                                                                                                                                                                                                                                                                                                                                                                                                                                                                                                                                                                                                                                                                                                                                                                                                                                                                                                                                                                                                                                                                                                                                                                                                                                                                                                                                  |
| YP_617364 | Sala_2322 | protein of unknown function DUF924                  | 40.51%            | 6                       |                                                                                                                                                                                                                                                                                                                                                                                                                                                                                                                                                                                                                                                                                                                                                                                                                                                                                                                                                                                                                                                                                                                                                                                                                                                                                                                                                                                                                                                                                                                                                                                                                                                                                                                                                                                                                                                                                                                                                                                                                                                                                                                                                                                                                                                                                                                                                                                                                                                                                                                                                                                                                                                                                                                                                                                                                                                                                                                                                                                                                                                                                                                                                                                                                                                                                                                                                                  |
| YP_617368 | Sala_2326 | nitrogen regulatory protein P-II                    | 50.00%            | 5                       |                                                                                                                                                                                                                                                                                                                                                                                                                                                                                                                                                                                                                                                                                                                                                                                                                                                                                                                                                                                                                                                                                                                                                                                                                                                                                                                                                                                                                                                                                                                                                                                                                                                                                                                                                                                                                                                                                                                                                                                                                                                                                                                                                                                                                                                                                                                                                                                                                                                                                                                                                                                                                                                                                                                                                                                                                                                                                                                                                                                                                                                                                                                                                                                                                                                                                                                                                                  |
| YP_617370 | Sala_2328 | TonB-dependent receptor                             | 48.85%            | 26                      |                                                                                                                                                                                                                                                                                                                                                                                                                                                                                                                                                                                                                                                                                                                                                                                                                                                                                                                                                                                                                                                                                                                                                                                                                                                                                                                                                                                                                                                                                                                                                                                                                                                                                                                                                                                                                                                                                                                                                                                                                                                                                                                                                                                                                                                                                                                                                                                                                                                                                                                                                                                                                                                                                                                                                                                                                                                                                                                                                                                                                                                                                                                                                                                                                                                                                                                                                                  |
| YP_617376 | Sala_2334 | protein of unknown function DUF442                  | 15.97%            | 2                       |                                                                                                                                                                                                                                                                                                                                                                                                                                                                                                                                                                                                                                                                                                                                                                                                                                                                                                                                                                                                                                                                                                                                                                                                                                                                                                                                                                                                                                                                                                                                                                                                                                                                                                                                                                                                                                                                                                                                                                                                                                                                                                                                                                                                                                                                                                                                                                                                                                                                                                                                                                                                                                                                                                                                                                                                                                                                                                                                                                                                                                                                                                                                                                                                                                                                                                                                                                  |
| YP_617377 | Sala_2335 | ATP-dependent DNA helicase RecQ                     | 7.93%             | 3                       |                                                                                                                                                                                                                                                                                                                                                                                                                                                                                                                                                                                                                                                                                                                                                                                                                                                                                                                                                                                                                                                                                                                                                                                                                                                                                                                                                                                                                                                                                                                                                                                                                                                                                                                                                                                                                                                                                                                                                                                                                                                                                                                                                                                                                                                                                                                                                                                                                                                                                                                                                                                                                                                                                                                                                                                                                                                                                                                                                                                                                                                                                                                                                                                                                                                                                                                                                                  |
| YP_617380 | Sala_2338 | Glyoxalase/bleomycin resistance protein/dioxigenase | 26.71%            | 2                       |                                                                                                                                                                                                                                                                                                                                                                                                                                                                                                                                                                                                                                                                                                                                                                                                                                                                                                                                                                                                                                                                                                                                                                                                                                                                                                                                                                                                                                                                                                                                                                                                                                                                                                                                                                                                                                                                                                                                                                                                                                                                                                                                                                                                                                                                                                                                                                                                                                                                                                                                                                                                                                                                                                                                                                                                                                                                                                                                                                                                                                                                                                                                                                                                                                                                                                                                                                  |
| YP_617382 | Sala_2340 | ABC transporter related                             | 7.45%             | 3                       |                                                                                                                                                                                                                                                                                                                                                                                                                                                                                                                                                                                                                                                                                                                                                                                                                                                                                                                                                                                                                                                                                                                                                                                                                                                                                                                                                                                                                                                                                                                                                                                                                                                                                                                                                                                                                                                                                                                                                                                                                                                                                                                                                                                                                                                                                                                                                                                                                                                                                                                                                                                                                                                                                                                                                                                                                                                                                                                                                                                                                                                                                                                                                                                                                                                                                                                                                                  |
| YP_617383 | Sala_2341 | OstA-like protein                                   | 53.93%            | 8                       |                                                                                                                                                                                                                                                                                                                                                                                                                                                                                                                                                                                                                                                                                                                                                                                                                                                                                                                                                                                                                                                                                                                                                                                                                                                                                                                                                                                                                                                                                                                                                                                                                                                                                                                                                                                                                                                                                                                                                                                                                                                                                                                                                                                                                                                                                                                                                                                                                                                                                                                                                                                                                                                                                                                                                                                                                                                                                                                                                                                                                                                                                                                                                                                                                                                                                                                                                                  |
| YP_617384 | Sala_2342 | hypothetical protein                                | 25.11%            | 3                       |                                                                                                                                                                                                                                                                                                                                                                                                                                                                                                                                                                                                                                                                                                                                                                                                                                                                                                                                                                                                                                                                                                                                                                                                                                                                                                                                                                                                                                                                                                                                                                                                                                                                                                                                                                                                                                                                                                                                                                                                                                                                                                                                                                                                                                                                                                                                                                                                                                                                                                                                                                                                                                                                                                                                                                                                                                                                                                                                                                                                                                                                                                                                                                                                                                                                                                                                                                  |
| YP_617385 | Sala_2343 | 3'-5' exonuclease                                   | 67.32%            | 10                      |                                                                                                                                                                                                                                                                                                                                                                                                                                                                                                                                                                                                                                                                                                                                                                                                                                                                                                                                                                                                                                                                                                                                                                                                                                                                                                                                                                                                                                                                                                                                                                                                                                                                                                                                                                                                                                                                                                                                                                                                                                                                                                                                                                                                                                                                                                                                                                                                                                                                                                                                                                                                                                                                                                                                                                                                                                                                                                                                                                                                                                                                                                                                                                                                                                                                                                                                                                  |
| YP_617386 | Sala_2344 | cold-shock DNA-binding domain protein               | 73.90%            | 17                      |                                                                                                                                                                                                                                                                                                                                                                                                                                                                                                                                                                                                                                                                                                                                                                                                                                                                                                                                                                                                                                                                                                                                                                                                                                                                                                                                                                                                                                                                                                                                                                                                                                                                                                                                                                                                                                                                                                                                                                                                                                                                                                                                                                                                                                                                                                                                                                                                                                                                                                                                                                                                                                                                                                                                                                                                                                                                                                                                                                                                                                                                                                                                                                                                                                                                                                                                                                  |
| YP_617394 | Sala_2352 | MitA-interacting MipA                               | 25.00%            | 5                       |                                                                                                                                                                                                                                                                                                                                                                                                                                                                                                                                                                                                                                                                                                                                                                                                                                                                                                                                                                                                                                                                                                                                                                                                                                                                                                                                                                                                                                                                                                                                                                                                                                                                                                                                                                                                                                                                                                                                                                                                                                                                                                                                                                                                                                                                                                                                                                                                                                                                                                                                                                                                                                                                                                                                                                                                                                                                                                                                                                                                                                                                                                                                                                                                                                                                                                                                                                  |
| YP_617396 | Sala_2354 | deoxyxylulose-5-phosphate synthase                  | 34.58%            | 15                      |                                                                                                                                                                                                                                                                                                                                                                                                                                                                                                                                                                                                                                                                                                                                                                                                                                                                                                                                                                                                                                                                                                                                                                                                                                                                                                                                                                                                                                                                                                                                                                                                                                                                                                                                                                                                                                                                                                                                                                                                                                                                                                                                                                                                                                                                                                                                                                                                                                                                                                                                                                                                                                                                                                                                                                                                                                                                                                                                                                                                                                                                                                                                                                                                                                                                                                                                                                  |

| Accession | Locus tag | Description                                                 | Sequence coverage | No. peptides identified | List of peptides identified                                                                                                                                                                                                                                                                                                                                                                                                                                                                                                                                                                                                                                                                                                                                                                                                                                                                                                                                                                                                                                                                                                                                                                                                                                                                                                                                                                                                                                                                                                                                                                                                                                                                                                                                                                                                                                                                                                                                                                                                                                                                                                                                                                                                                                                                                                                                                                                                                                                                                                                                                                                                                                                                                                                                                                                                                                                                                                                                                                                                                                                                                                                                                                                                                                                                                                                                               |
|-----------|-----------|-------------------------------------------------------------|-------------------|-------------------------|---------------------------------------------------------------------------------------------------------------------------------------------------------------------------------------------------------------------------------------------------------------------------------------------------------------------------------------------------------------------------------------------------------------------------------------------------------------------------------------------------------------------------------------------------------------------------------------------------------------------------------------------------------------------------------------------------------------------------------------------------------------------------------------------------------------------------------------------------------------------------------------------------------------------------------------------------------------------------------------------------------------------------------------------------------------------------------------------------------------------------------------------------------------------------------------------------------------------------------------------------------------------------------------------------------------------------------------------------------------------------------------------------------------------------------------------------------------------------------------------------------------------------------------------------------------------------------------------------------------------------------------------------------------------------------------------------------------------------------------------------------------------------------------------------------------------------------------------------------------------------------------------------------------------------------------------------------------------------------------------------------------------------------------------------------------------------------------------------------------------------------------------------------------------------------------------------------------------------------------------------------------------------------------------------------------------------------------------------------------------------------------------------------------------------------------------------------------------------------------------------------------------------------------------------------------------------------------------------------------------------------------------------------------------------------------------------------------------------------------------------------------------------------------------------------------------------------------------------------------------------------------------------------------------------------------------------------------------------------------------------------------------------------------------------------------------------------------------------------------------------------------------------------------------------------------------------------------------------------------------------------------------------------------------------------------------------------------------------------------------------|
| YP_617397 | Sala_2355 | hypothetical protein                                        | 61.87%            | 7                       | R.HNSAGVEEAGVRA.<br>R.GLSTSVIDL.R.F<br>R.LPDMFQQQKPKELQYDAAGLNAPQIVDTVLK.A<br>K.TVAISLGLTR.L<br>R.IVAITAAMPSTGTGVDK.F<br>K.RSESEYDFGAAHSSTSSISAALGFAIANK.L<br>K.GYAPAEAAADKYHGQK.F<br>R.SESEYDFGAAHSSTSSISAALGFAIANK.L<br>R.PFAAIVTFLQR.A<br>R.GNSTGVLPVAVPQK.L<br>R.FAKPLDEELIR.R<br>K.FDVTGEQAK.A<br>R.SQVGSPTDQVVDK.G<br>R.SPGEAQIIGSADGAR.A<br>R.SQVGSPTDQVVDKGLVLR.D<br>R.DLAAPEGDRDAQAAPGA.<br>R.PGGESTAEQTLR.A<br>R.QAPLVVPPDFALTPAPGTARPGGESTAEQTLR.A<br>R.QAPLVVPPDFALTPAPGTAR.P<br>K.AGQADAKPSVD.<br>K.WIVTVPLEPK.G<br>R.ESGDPVPAADPALGSR.L<br>R.AAVDFPNSYTR.L<br>R.EAGGLLAASADYK.H<br>R.AWGVPTLVN.R.K<br>R.YLLGALDGFTEER.I<br>R.AYAQHWVDTR.E<br>R.AQELGPDYDAADYER.V<br>R.KGEGDALTAGHPDPPLPEGEGDTR.L.T<br>R.ESGVDAWSDAR.A<br>K.AGLPQKPLILAK.W<br>R.YAAPLVFTSEEVWGR.Y<br>R.SVLDVLFHALVR.Y<br>K.WLEGNLEGR.E<br>K.TGQYLNQVND.R.I<br>R.WHEVNGLDLFGK.A<br>R.KTGQYLNQVND.R.I<br>R.TLAMAADTR.F<br>R.HDGGTHSADLYLEGSDQHR.G<br>K.YREDVWGLGGGQSVNPK.F<br>K.ANGIDVFAVEGDK.Y<br>K.EILAGVADQYR.K<br>K.LNKDEVVEFR.A<br>R.IADVAAMPELER.Y<br>K.EILAGVADQYR.L<br>K.WEVEATSGDK.I<br>K.DRPDWLSR.Q<br>R.IADPLGDTFVHWHVDFVR.V<br>K.YVVAADLYEFR.T<br>R.RWHEVNGLDLFGK.A<br>K.AVLTHTGFTMDAK.G<br>R.DYDADTLR.L<br>K.FAANDMLYR.G<br>R.WAASGAIEPLRR.D<br>R.WAASGAIEPLR.R<br>R.TLAMAADTR.F<br>R.LIGGGDWDHPYLTMDYEAETIVR.E<br>R.LEVHCFHDADLELR.S<br>R.KYVAADLYEFR.T<br>R.IGKELAGVADQYR.K<br>R.IADVAAMPELER.Y<br>R.HLPEVTADGALCNR.C<br>R.GWFQSSLLESCGTR.G<br>R.GAKPVMWSPVEK.T<br>R.GAKPVMWSPVEK.T<br>K.FNAPDGRICDLE.E<br>K.FAANDMLYR.G<br>K.DVLYCDLGAAPLGTDK.R<br>K.AVLTHTGFTMDAK.G<br>R.YPDAGSVHLEWPDLDHLLHR.E<br>R.VGTFPESHK.C<br>R.LRGNTLVEK.W<br>R.KDLYCDLGAAPLGTDK.R<br>R.DYRDTVFLK.T<br>K.SLGTISPIDLMR.D<br>R.LEKWEVVEATSGDK.I<br>R.YGAGVVTGADVFVGK.G<br>R.SGVVTLADHAR.R<br>R.GGVIALGNDFGPHAGQAVGR.A<br>R.FDTAQLVQVTDALIDAGFSDDEIR.A<br>R.DLVGINHVALGSDYDGGATTVR.F<br>R.LKDGHVAVLVAATTK.S<br>R.AEALHQTITVDLHSDSLLWSR.D<br>R.AAASNGTLKPVATTADLALLAAR.R<br>R.AGEAGRPAVSFTLAR.R<br>R.DADWQEEGAEVAVVEALKR.A<br>R.IELTEVLEPAGDAVIDYPPALWR.E<br>R.KTFDSLPAVLEGR.R<br>K.TFDSLPAVLEGR.R<br>R.DADWQEEGAEVAVVEALKR<br>R.LATAADADAADDAIDR.H<br>R.VHNSGHWTEGAVTSQFENHIR.A<br>R.EVLGQEEAR.G<br>R.AVAGPLGSTATLPTVTR.N<br>R.NLIGAEIATVPALLADAAHVHYGK.A<br>R.VHVIAPRESVAADVAHHTRA.A<br>R.HAVLEGVYTFTHFSALYR.G<br>R.FLSGHVAVRPGAALAEIQAQR.L<br>K.LGHVTVWFGVGNTPA.<br>R.MLGQAAAQLGYR.V<br>R.PAPFAAVPDRPALDAGEVGAPAILK.T<br>R.FWDSPVNWHANGILASSLPPR.E<br>R.FVGLGGRAPFAVPPDRPALDAGEVGAPAILK.T<br>K.AGATNAGLFAVALLANADPDLAQK.L<br>R.QADSVAPVREG.<br>R.QADSVAPVREG.<br>K.AGATNAGLFAVALLANADPDLAQKLDARW.A<br>R.VPVLGVPVQSAALSGVDSLSIVQMPPGVPVATFAIGK.A<br>K.AIAGAGAAHLPGVAAVTR.V<br>R.IAVDQFAAVSVDSEDQLR.E<br>R.AAVFVDVNLQK.Y<br>R.NLAEDNKLALLQLR.D<br>K.SAAEADGDJATSGLVGDWADETQQR.I<br>R.ASIRDADAGVDADTMIR.N<br>R.ESGDTTATAIDGAK.A<br>R.MRMJAVLALLVAAR.P<br>R.VYDTSGPYDTPADIDIAQGLPELR.A<br>R.EVRPEDNQLGPRD.S<br>R.NSPVPIGTVPYQALEK.V<br>R.ARGDVEEVAQR.E<br>K.LAAHRAADLAK.G<br>K.VGGIAEELTWEIFR.D<br>R.LDTTQATPIGVTTGPIR.G<br>R.EILLEPSSGEPVVR.V<br>R.DTLIEQAEQGVDFYTHAGVR.L<br>K.LQNQDSAGFIAAEAEK.G<br>K.AYDJASLGDGLRPSADANDEAQFAELYTLGELTR.R<br>K.INANIGNSAVASDVAAEVK.H<br>R.WRDFNLSLDPTAEQYHDQTLPAEGAK.T<br>K.EHLGLPRDDVK.V<br>K.INANIGNSAVASDVAAEVDKMWVSR.W<br>R.WIGADTVMDLSTGR.N<br>R.KIHVASPTGSGIR.V<br>R.ESLYDHFDEIEMK.A<br>R.AIIPSNINHPESEPMIAGR.N<br>R.DGQDWGASIPDYTFEVRDEVAR.G<br>R.AKPGANVSMHYAR.R |
| YP_617398 | Sala_2356 | lipoprotein signal peptidase                                | 13.29%            | 2                       |                                                                                                                                                                                                                                                                                                                                                                                                                                                                                                                                                                                                                                                                                                                                                                                                                                                                                                                                                                                                                                                                                                                                                                                                                                                                                                                                                                                                                                                                                                                                                                                                                                                                                                                                                                                                                                                                                                                                                                                                                                                                                                                                                                                                                                                                                                                                                                                                                                                                                                                                                                                                                                                                                                                                                                                                                                                                                                                                                                                                                                                                                                                                                                                                                                                                                                                                                                           |
| YP_617399 | Sala_2357 | isoleucyl-tRNA synthetase                                   | 56.07%            | 55                      |                                                                                                                                                                                                                                                                                                                                                                                                                                                                                                                                                                                                                                                                                                                                                                                                                                                                                                                                                                                                                                                                                                                                                                                                                                                                                                                                                                                                                                                                                                                                                                                                                                                                                                                                                                                                                                                                                                                                                                                                                                                                                                                                                                                                                                                                                                                                                                                                                                                                                                                                                                                                                                                                                                                                                                                                                                                                                                                                                                                                                                                                                                                                                                                                                                                                                                                                                                           |
| YP_617400 | Sala_2358 | riboflavin biosynthesis protein RibF                        | 16.18%            | 3                       |                                                                                                                                                                                                                                                                                                                                                                                                                                                                                                                                                                                                                                                                                                                                                                                                                                                                                                                                                                                                                                                                                                                                                                                                                                                                                                                                                                                                                                                                                                                                                                                                                                                                                                                                                                                                                                                                                                                                                                                                                                                                                                                                                                                                                                                                                                                                                                                                                                                                                                                                                                                                                                                                                                                                                                                                                                                                                                                                                                                                                                                                                                                                                                                                                                                                                                                                                                           |
| YP_617401 | Sala_2359 | peptidase M19, renal dipeptidase                            | 27.48%            | 5                       |                                                                                                                                                                                                                                                                                                                                                                                                                                                                                                                                                                                                                                                                                                                                                                                                                                                                                                                                                                                                                                                                                                                                                                                                                                                                                                                                                                                                                                                                                                                                                                                                                                                                                                                                                                                                                                                                                                                                                                                                                                                                                                                                                                                                                                                                                                                                                                                                                                                                                                                                                                                                                                                                                                                                                                                                                                                                                                                                                                                                                                                                                                                                                                                                                                                                                                                                                                           |
| YP_617402 | Sala_2360 | Dihydrofolate reductase                                     | 45.45%            | 6                       |                                                                                                                                                                                                                                                                                                                                                                                                                                                                                                                                                                                                                                                                                                                                                                                                                                                                                                                                                                                                                                                                                                                                                                                                                                                                                                                                                                                                                                                                                                                                                                                                                                                                                                                                                                                                                                                                                                                                                                                                                                                                                                                                                                                                                                                                                                                                                                                                                                                                                                                                                                                                                                                                                                                                                                                                                                                                                                                                                                                                                                                                                                                                                                                                                                                                                                                                                                           |
| YP_617403 | Sala_2361 | phosphoribosylaminoimidazole carboxylase, ATPase subunit    | 67.31%            | 13                      |                                                                                                                                                                                                                                                                                                                                                                                                                                                                                                                                                                                                                                                                                                                                                                                                                                                                                                                                                                                                                                                                                                                                                                                                                                                                                                                                                                                                                                                                                                                                                                                                                                                                                                                                                                                                                                                                                                                                                                                                                                                                                                                                                                                                                                                                                                                                                                                                                                                                                                                                                                                                                                                                                                                                                                                                                                                                                                                                                                                                                                                                                                                                                                                                                                                                                                                                                                           |
| YP_617404 | Sala_2362 | phosphoribosylaminoimidazole carboxylase, catalytic subunit | 59.76%            | 6                       |                                                                                                                                                                                                                                                                                                                                                                                                                                                                                                                                                                                                                                                                                                                                                                                                                                                                                                                                                                                                                                                                                                                                                                                                                                                                                                                                                                                                                                                                                                                                                                                                                                                                                                                                                                                                                                                                                                                                                                                                                                                                                                                                                                                                                                                                                                                                                                                                                                                                                                                                                                                                                                                                                                                                                                                                                                                                                                                                                                                                                                                                                                                                                                                                                                                                                                                                                                           |
| YP_617405 | Sala_2363 | diguanylate cyclase                                         | 14.49%            | 2                       |                                                                                                                                                                                                                                                                                                                                                                                                                                                                                                                                                                                                                                                                                                                                                                                                                                                                                                                                                                                                                                                                                                                                                                                                                                                                                                                                                                                                                                                                                                                                                                                                                                                                                                                                                                                                                                                                                                                                                                                                                                                                                                                                                                                                                                                                                                                                                                                                                                                                                                                                                                                                                                                                                                                                                                                                                                                                                                                                                                                                                                                                                                                                                                                                                                                                                                                                                                           |
| YP_617408 | Sala_2366 | Ferritin and Dps                                            | 37.75%            | 3                       |                                                                                                                                                                                                                                                                                                                                                                                                                                                                                                                                                                                                                                                                                                                                                                                                                                                                                                                                                                                                                                                                                                                                                                                                                                                                                                                                                                                                                                                                                                                                                                                                                                                                                                                                                                                                                                                                                                                                                                                                                                                                                                                                                                                                                                                                                                                                                                                                                                                                                                                                                                                                                                                                                                                                                                                                                                                                                                                                                                                                                                                                                                                                                                                                                                                                                                                                                                           |
| YP_617411 | Sala_2369 | hypothetical protein                                        | 21.92%            | 2                       |                                                                                                                                                                                                                                                                                                                                                                                                                                                                                                                                                                                                                                                                                                                                                                                                                                                                                                                                                                                                                                                                                                                                                                                                                                                                                                                                                                                                                                                                                                                                                                                                                                                                                                                                                                                                                                                                                                                                                                                                                                                                                                                                                                                                                                                                                                                                                                                                                                                                                                                                                                                                                                                                                                                                                                                                                                                                                                                                                                                                                                                                                                                                                                                                                                                                                                                                                                           |
| YP_617412 | Sala_2370 | thiamine biosynthesis protein ThiC                          | 70.16%            | 35                      |                                                                                                                                                                                                                                                                                                                                                                                                                                                                                                                                                                                                                                                                                                                                                                                                                                                                                                                                                                                                                                                                                                                                                                                                                                                                                                                                                                                                                                                                                                                                                                                                                                                                                                                                                                                                                                                                                                                                                                                                                                                                                                                                                                                                                                                                                                                                                                                                                                                                                                                                                                                                                                                                                                                                                                                                                                                                                                                                                                                                                                                                                                                                                                                                                                                                                                                                                                           |

| Accession | Locus tag | Description                           | Sequence coverage | No. peptides identified | List of peptides identified                                                                                                                                                                                                                                                                                                                                                                                                                                                                                                                                                                                                                                                                                                                                                                                                                                                                                                                                                                                                                                                                                                                                                                                                                                                                                                                                                                                                                                                                                                                                                                                                                                                                                                                                                                                                                                                                                                                                                                                                                                                                                                                                                                                                                                                                                                                                                                                                                                                                                                                                                                                                                                                                                                                                                                                                                                                                                                                                                                                                                                         |
|-----------|-----------|---------------------------------------|-------------------|-------------------------|---------------------------------------------------------------------------------------------------------------------------------------------------------------------------------------------------------------------------------------------------------------------------------------------------------------------------------------------------------------------------------------------------------------------------------------------------------------------------------------------------------------------------------------------------------------------------------------------------------------------------------------------------------------------------------------------------------------------------------------------------------------------------------------------------------------------------------------------------------------------------------------------------------------------------------------------------------------------------------------------------------------------------------------------------------------------------------------------------------------------------------------------------------------------------------------------------------------------------------------------------------------------------------------------------------------------------------------------------------------------------------------------------------------------------------------------------------------------------------------------------------------------------------------------------------------------------------------------------------------------------------------------------------------------------------------------------------------------------------------------------------------------------------------------------------------------------------------------------------------------------------------------------------------------------------------------------------------------------------------------------------------------------------------------------------------------------------------------------------------------------------------------------------------------------------------------------------------------------------------------------------------------------------------------------------------------------------------------------------------------------------------------------------------------------------------------------------------------------------------------------------------------------------------------------------------------------------------------------------------------------------------------------------------------------------------------------------------------------------------------------------------------------------------------------------------------------------------------------------------------------------------------------------------------------------------------------------------------------------------------------------------------------------------------------------------------|
|           |           |                                       |                   |                         | K.IHVASPTGSSIR.V<br>R.DQFNLSLDPDPAEQYHDQTLPAEAGK.T<br>K.RVTGIVSR.G<br>K.LIQNDQDAGFAAEAEKGMMAEMSQYVEDTGR.E<br>K.GMAEMSQYVEDTGR.E<br>R.RGIITPEMEYVATR.E<br>R.DGQDQWASIPDYVTFEVR.D<br>K.GHPAAQVRDALS.K.A<br>R.GIITPEMEYVATR.E<br>R.GDVEEVAQR.E<br>R.RAWAQDQVMIEGPHVPMHK.I<br>R.LPVVPLAAK.R<br>K.VGGIAEELTWEIFRDLIEQAEQGVDFYTIHAGVR.L<br>K.INANIGNSAVASDVAEVDKMWWSIR.W                                                                                                                                                                                                                                                                                                                                                                                                                                                                                                                                                                                                                                                                                                                                                                                                                                                                                                                                                                                                                                                                                                                                                                                                                                                                                                                                                                                                                                                                                                                                                                                                                                                                                                                                                                                                                                                                                                                                                                                                                                                                                                                                                                                                                                                                                                                                                                                                                                                                                                                                                                                                                                                                                                  |
| YP_617413 | Sala_2371 | hypothetical protein                  | 13.19%            | 2                       | R.FVDAISDRLEPLWSPGR.A<br>R.TLEPLWSPGR.A<br>K.ANYTAEVLEIGGIVESDPK.F<br>K.AAADALLPAAGDIWEGGR.T<br>R.VAAEFPLGAAWVEK.G<br>R.AAVTLEQQDGGFTTK.S<br>K.VPGIDAEFAR.L<br>R.AGYSQDLETR.A<br>R.VLDAQPYGFATR.F<br>K.SALTLAAKPGIDAEFAR.L<br>K.FTDAVAVAADPAK.V<br>R.IGGEFAQPYMAALK.Q<br>R.DWFAALDTPDAVR.V<br>R.VEQSDVFSVSR.V<br>R.RDEINDPGDATALGNVANFTTSGITAGR.T<br>R.GAVAFDNLVLSVVR.Q<br>R.AAAGPDAGSIASTDR.Y<br>R.VSTVVTATPPVIGQAPAFGTQYDYLGR.R<br>K.LFDLPAGPVGAAGFATR.R<br>R.TLTGIANLFDTPPR.V<br>K.VGADVAVTDWLRL.L<br>K.TGASSYGSDAVGVVNLTR.D<br>K.SESEADVYYR.G<br>R.ATATEILGLGDANWSR.Q<br>R.TGDAYDAR.F<br>R.EGTVQLDSDGEEPPGDLPLAR.S<br>R.VDVALYSR.Q<br>R.TVQDLGVFAGLPELVR.T<br>R.LVAIATDGSQFFGTGETSVR.T<br>R.ISQAGVPR.T<br>R.IGDDDAVAR.W<br>R.FSEDMVALGDPRAAAPATNDCK.R<br>R.FAIDTGGPSAR.A<br>R.FAGPLPQNVDAALILPADVTDQSGR.A<br>R.EGVLSSFVPLK.G<br>R.DGSLAWVTSLATKPVAGAEIR.V<br>R.ASIDVPLSDNLGFR.L<br>K.FAAEFGILEASEGGVLPVTVR.G<br>K.SLDAILATAEK.K<br>K.SLDAILATAEK.S<br>R.GIVEHEDDPAAPPVPPVPSFD.<br>R.ELPGSFSTNDVLGGLR.A<br>K.AVDIPYEFTLDNGLR.V<br>R.VSWIATAPVQADR.T<br>R.LDEJAAALASGPTADELQR.A<br>R.AANDIFGGDFLSR.F<br>R.TNYFETVPTGALDALLFLESDR.M<br>K.HFEIAPVKPQR.I<br>R.IFVVGDTLAEVTK.E<br>R.ATASHLGGTISQLESVGGFGK.A<br>K.RLDEEIAAFASGPTADELQR.A<br>R.YEIEHLFR.G<br>R.PAFSLIYTPGER.T<br>R.QVGATDFNGTFLDR.T<br>K.WFTDNYGNNAVVLVLAGDIDLATAK.A<br>K.APQSVIVAGK.V<br>K.FDRPDYIEK.L<br>K.APVSVVPLPAPLAK.E<br>R.SALGTQSLMLMDEGTTSLDSIAFAEK.E<br>K.GGDELEVR.A<br>R.TQVTNEKDR.V<br>R.IFVVGDTLAEVTKELDR.A<br>R.VLKRALYGDHPGIPPSGLGNEK.A<br>R.LKALNEPR.A<br>K.AVTLAEGALYSNDPAYKVELDR.L<br>K.LPATYEAMTPEAVDAAAR.K<br>K.AVTLAEGALYSNDPAYK.V<br>K.ALSADDLIYVVGDAAVKPKQLDGLGLPVEVSPAN.<br>R.TGDSIKELQSDLK.A<br>K.GVTKELQR.T<br>R.MGHLLGAVTQEK.L<br>R.LGAQTYGYADADETALGLFALKPNLSASLALLADYR.N<br>R.QGDNPPYGLLR.Y<br>R.DQLVAFHSAWIRPDNAR.I<br>R.GHPYHSTIGSMADLDAASLDDVKK.W<br>K.WLSRPAFSLIYTPGER.T<br>K.NGIEVVFAR.R<br>K.LKNGIEVVFAR.R<br>R.KAPVAVSVWYR.V<br>R.SALGTQSLMLMDEGTTSLDSIAFAEAKER.L<br>R.NPAFDAR.E<br>R.MWMTMPLNDPEAVPLQMAMAVLGLSSSR.L<br>R.LLVDRPK.A<br>K.FDRPDYIEKLPATYEAMTPEAVDAAAR.K<br>R.SQFPEVSGLK.A<br>R.SAVPTVNVQVFDAGYAADPR.S<br>R.GASSIADRSQFPEVSGLK.A<br>K.VLDVKGDELEVR.A<br>K.TGFHLEHLMFNGSENAPDDFFEPLR.Q<br>K.APVAVSVWYR.V<br>R.LSALFPVTGEDVVAGVLR.S<br>K.VDYAEALLGVR.A<br>R.ALAQAQALLR.K<br>R.AAMAGQGVPATNFVYADAK.G<br>K.VGFPVLPVPR.T<br>R.LLALDTKDDR.A<br>R.LLIEFASGPIDGAR.L<br>R.HQLKPVLFDPALR.A<br>R.HGDSFIMFVTWDR.G<br>R.GVLGDTSAALWTR.T<br>R.LLLVAGAPSSSLALAEAGGK.A<br>R.LVLADANEVYR.E<br>R.DLANEPANVIYPSFVAR.V<br>R.DDELAALLAAGTASGEELWR.M<br>R.APTGAALVIMTDAALPLDGVALSAPER.Q<br>K.TPPSAAVTLVGANPSTAEAFATR.W<br>R.QAVEAIAAASFDGK.A<br>R.KTTPSAAVTLVGANPSTAEAFATR.W<br>R.AIVNIATLTGSIGALDDR.Y<br>K.TIEMLNDAEGR.L<br>R.GVGAPAAPLAFVKGK.G<br>K.GDMSGAASVGAALS.LAK.S<br>R.LLGMSTLVGGQSPR.G<br>R.AIVNIATLTGSIGALDDRKYAGLFSR.D<br>R.SESASPLVR.G<br>R.QAVEAIAAASFDGKAESTLSLR.G<br>R.AAFAGVPGSIEVLEAAMR.R<br>R.LVGAPPYGVYEGGTLTEAVR.R<br>K.LPAVSGSQAQTPGLDNDAVR.L<br>R.LASLQAEALANLEQQSAELTK.W<br>R.FQPVFVGEPTVEDSISILR.G<br>R.LLALDMGALJAGAK.Y<br>K.AFADAGVSADALNAIAK.L |
| YP_617414 | Sala_2372 | sulfotransferase                      | 16.93%            | 3                       |                                                                                                                                                                                                                                                                                                                                                                                                                                                                                                                                                                                                                                                                                                                                                                                                                                                                                                                                                                                                                                                                                                                                                                                                                                                                                                                                                                                                                                                                                                                                                                                                                                                                                                                                                                                                                                                                                                                                                                                                                                                                                                                                                                                                                                                                                                                                                                                                                                                                                                                                                                                                                                                                                                                                                                                                                                                                                                                                                                                                                                                                     |
| YP_617416 | Sala_2374 | OsmC-like protein                     | 40.85%            | 5                       |                                                                                                                                                                                                                                                                                                                                                                                                                                                                                                                                                                                                                                                                                                                                                                                                                                                                                                                                                                                                                                                                                                                                                                                                                                                                                                                                                                                                                                                                                                                                                                                                                                                                                                                                                                                                                                                                                                                                                                                                                                                                                                                                                                                                                                                                                                                                                                                                                                                                                                                                                                                                                                                                                                                                                                                                                                                                                                                                                                                                                                                                     |
| YP_617420 | Sala_2378 | uracil-DNA glycosylase                | 19.23%            | 3                       |                                                                                                                                                                                                                                                                                                                                                                                                                                                                                                                                                                                                                                                                                                                                                                                                                                                                                                                                                                                                                                                                                                                                                                                                                                                                                                                                                                                                                                                                                                                                                                                                                                                                                                                                                                                                                                                                                                                                                                                                                                                                                                                                                                                                                                                                                                                                                                                                                                                                                                                                                                                                                                                                                                                                                                                                                                                                                                                                                                                                                                                                     |
| YP_617421 | Sala_2379 | TonB-dependent receptor               | 17.31%            | 10                      |                                                                                                                                                                                                                                                                                                                                                                                                                                                                                                                                                                                                                                                                                                                                                                                                                                                                                                                                                                                                                                                                                                                                                                                                                                                                                                                                                                                                                                                                                                                                                                                                                                                                                                                                                                                                                                                                                                                                                                                                                                                                                                                                                                                                                                                                                                                                                                                                                                                                                                                                                                                                                                                                                                                                                                                                                                                                                                                                                                                                                                                                     |
| YP_617424 | Sala_2382 | alpha-2-macroglobulin-like protein    | 12.31%            | 15                      |                                                                                                                                                                                                                                                                                                                                                                                                                                                                                                                                                                                                                                                                                                                                                                                                                                                                                                                                                                                                                                                                                                                                                                                                                                                                                                                                                                                                                                                                                                                                                                                                                                                                                                                                                                                                                                                                                                                                                                                                                                                                                                                                                                                                                                                                                                                                                                                                                                                                                                                                                                                                                                                                                                                                                                                                                                                                                                                                                                                                                                                                     |
| YP_617426 | Sala_2384 | amino acid permease-associated region | 6.95%             | 3                       |                                                                                                                                                                                                                                                                                                                                                                                                                                                                                                                                                                                                                                                                                                                                                                                                                                                                                                                                                                                                                                                                                                                                                                                                                                                                                                                                                                                                                                                                                                                                                                                                                                                                                                                                                                                                                                                                                                                                                                                                                                                                                                                                                                                                                                                                                                                                                                                                                                                                                                                                                                                                                                                                                                                                                                                                                                                                                                                                                                                                                                                                     |
| YP_617429 | Sala_2387 | peptidase M16-like protein            | 70.49%            | 49                      |                                                                                                                                                                                                                                                                                                                                                                                                                                                                                                                                                                                                                                                                                                                                                                                                                                                                                                                                                                                                                                                                                                                                                                                                                                                                                                                                                                                                                                                                                                                                                                                                                                                                                                                                                                                                                                                                                                                                                                                                                                                                                                                                                                                                                                                                                                                                                                                                                                                                                                                                                                                                                                                                                                                                                                                                                                                                                                                                                                                                                                                                     |
| YP_617430 | Sala_2388 | Penicillin amidase                    | 18.80%            | 10                      |                                                                                                                                                                                                                                                                                                                                                                                                                                                                                                                                                                                                                                                                                                                                                                                                                                                                                                                                                                                                                                                                                                                                                                                                                                                                                                                                                                                                                                                                                                                                                                                                                                                                                                                                                                                                                                                                                                                                                                                                                                                                                                                                                                                                                                                                                                                                                                                                                                                                                                                                                                                                                                                                                                                                                                                                                                                                                                                                                                                                                                                                     |
| YP_617431 | Sala_2389 | Leucyl aminopeptidase                 | 47.48%            | 17                      |                                                                                                                                                                                                                                                                                                                                                                                                                                                                                                                                                                                                                                                                                                                                                                                                                                                                                                                                                                                                                                                                                                                                                                                                                                                                                                                                                                                                                                                                                                                                                                                                                                                                                                                                                                                                                                                                                                                                                                                                                                                                                                                                                                                                                                                                                                                                                                                                                                                                                                                                                                                                                                                                                                                                                                                                                                                                                                                                                                                                                                                                     |
| YP_617433 | Sala_2391 | ATPase AAA-2                          | 64.49%            | 44                      |                                                                                                                                                                                                                                                                                                                                                                                                                                                                                                                                                                                                                                                                                                                                                                                                                                                                                                                                                                                                                                                                                                                                                                                                                                                                                                                                                                                                                                                                                                                                                                                                                                                                                                                                                                                                                                                                                                                                                                                                                                                                                                                                                                                                                                                                                                                                                                                                                                                                                                                                                                                                                                                                                                                                                                                                                                                                                                                                                                                                                                                                     |

| Accession | Locus tag | Description                                                             | Sequence coverage | No. peptides identified | List of peptides identified                                                                                                                                                                                                                                                                                                                                                                                                                                                                                                                                                                                                                                                                                                                                                                                                                                                                                                                                                                                                                                                                                                                                                                                                                                                                                                                                                                                                                                                                                                                                                                                                                                                                                                                                                                                                                                                                                                                                                                                                                                                                                                                                                                                                                                                                                                                                                                                                                                                                                                                                                                                                                                                                                                                                                                                                                                                                                                                                                                                                                                                                                                                                                                                                                                                                                                                                                                                                                                        |
|-----------|-----------|-------------------------------------------------------------------------|-------------------|-------------------------|--------------------------------------------------------------------------------------------------------------------------------------------------------------------------------------------------------------------------------------------------------------------------------------------------------------------------------------------------------------------------------------------------------------------------------------------------------------------------------------------------------------------------------------------------------------------------------------------------------------------------------------------------------------------------------------------------------------------------------------------------------------------------------------------------------------------------------------------------------------------------------------------------------------------------------------------------------------------------------------------------------------------------------------------------------------------------------------------------------------------------------------------------------------------------------------------------------------------------------------------------------------------------------------------------------------------------------------------------------------------------------------------------------------------------------------------------------------------------------------------------------------------------------------------------------------------------------------------------------------------------------------------------------------------------------------------------------------------------------------------------------------------------------------------------------------------------------------------------------------------------------------------------------------------------------------------------------------------------------------------------------------------------------------------------------------------------------------------------------------------------------------------------------------------------------------------------------------------------------------------------------------------------------------------------------------------------------------------------------------------------------------------------------------------------------------------------------------------------------------------------------------------------------------------------------------------------------------------------------------------------------------------------------------------------------------------------------------------------------------------------------------------------------------------------------------------------------------------------------------------------------------------------------------------------------------------------------------------------------------------------------------------------------------------------------------------------------------------------------------------------------------------------------------------------------------------------------------------------------------------------------------------------------------------------------------------------------------------------------------------------------------------------------------------------------------------------------------------|
|           |           |                                                                         |                   |                         | R.LLDQAEQVAAK.A<br>K.NNPVLIPEGVGK.T<br>K.AAEGEILFIDEMHTLVGAGK.S<br>R.AVAGIDALLAK.L<br>K.YLQDPLADLILK.G<br>K.AGSEYVAVQNILLAMVLPSTPVGK.A<br>R.KVTLDLTDAAR.A<br>K.HVEKDPALQR.R<br>R.LEIVLFLHR.L<br>R.EEVTADIIAAVVS.R.W<br>R.TKNNPVLIGEPVGK.T<br>R.SALEQAQR.A<br>R.ITDGAIVAAATLSHR.Y<br>K.GFLQAAQTIAIR.M<br>R.TADTASAEEDRYDALR.K<br>R.RFQPVFVCEPTVEDSISILR.G<br>K.IKEELDAAR.S<br>K.ESDAASKDR.L<br>K.AGELSYGTIPALEK.R<br>R.VIGQDEAVR.A<br>R.LKGVLDVVK.A<br>K.SEGANDASMLKPARAL.G<br>K.ALLEDSQMAAGLIANSQGDTR.A<br>K.AHGDVFNILLQVLDLDR.L<br>K.AGELSYGTIPALEK.R.L<br>R.DLTVAR.E<br>K.AHGDVFNILLQVLDLDR.LDQGR.T<br>R.TVDFTNTLILISNLGSAIAALPDGAPVEQAEPAVMEVVR.A<br>R.AHRREFLNR.L<br>K.VTLDLTDAAR.A<br>R.TADTASAEDR.Y<br>R.LGQEHMGGVVDIQVAR.V<br>R.LAEAEASGNAMLREEVTADIIAAVVS.R.W<br>R.GELHCGATTLDYRK.H<br>R.FLDDDNAMVR.I<br>K.YLQDPLADLILKGEVR.D<br>K.WQAEKEK.I<br>K.MEETLQR.V<br>R.DSDVPSAASDEGR.K<br>R.LRPGMFAWVTLGDAEPALLVPSEAVIR.T<br>R.VIALPTIQSDSR.T<br>R.DSDVPSAASDEGRK.I<br>K.IVASQFLLDSEASLTGIAVRPLGDAK.<br>R.VGISDFGVNASR.I<br>R.DVPPHVDVTTDLAAPPQFQSLPLR.A<br>R.ADLNLAVGSGIAEWR.R<br>R.LFHSIVHHEAFPIQLEER.F<br>R.ELQAEVLR.R<br>R.ANADLALLEVPGVTR.L<br>R.IVAAPGASEVR.L<br>R.SGAPALTESQVR.E<br>R.NTAVDGSNTIANLER.V<br>K.GWRDPPRLVLGIANTQQDPISGTSTAK.E<br>R.RQDLAGVGPATVSAEQIENGWNIETVLR.L<br>R.FQVGVNDFDR.K<br>K.LPAGPVSAAGVVR.K<br>K.GLVPGLSLTADWFDIK.I<br>R.QFFQETDWTQGTFLGR.G<br>R.AVLNPGQIHFQVGGNGFFEPYSAK.H<br>K.SNOQIATPGLR.N<br>K.HNFNSNPLNAVSPVER.V<br>K.ATDFNAAPGDIGYSTPNFYHNLQVAEIDEK.T<br>R.TDVEGLLSVR.Q<br>R.NLSIAASNPTNPTGQNVLIQR.R<br>R.LVAGGTGANSFDLNMIPVAALAR.T<br>R.SNYDLFSDWYWK.G<br>K.VVLPFGGAPIDDFGFIGGGNGGYPK.W<br>K.GSVDWVINDSFR.L<br>K.GDSDFTADLLWVGR.N<br>R.TDVLKDGASAIYADAMAGVNLVTR.T<br>R.QGITEKGGSDFTADLLWVGR.N<br>R.QDLAGVGPATVSAEQIENGWNIETVLR.L<br>R.GYGLVIAEKDGSVATWSTQWIGK.A<br>K.TSAVNMATR.A<br>K.LSNDWGWIEIAGAFGR.N<br>R.SNWAAYTSLEGLNLDALQFGLAGR.Y<br>R.NPDSFJSTSIPLNTPGGQR.F<br>K.AADSAQRDITIGAELEK.G<br>K.SEGEVFGEIESAEVQALYSR.A<br>R.WDGEAWYGGDINR.L<br>K.EFAPYVGVWAR.K<br>R.DNWTALFSPGER.V<br>R.AIGINTVPPLVR.L<br>K.VLTHYDLVALER.N<br>R.MTVVQADGLNVPTLDEDFQIAVAETYDVIVTPVEDR.A<br>R.MGEPGGLENVGHK.V<br>R.EHVWVLSHQSLSPEAIFR.K<br>R.ALALVEPSGVDPQVKG.G<br>K.TGTLTEGRPSVVAIEVAFEGFEEDLLR.I<br>R.SDSDDEEVALEEVAVGDMLR.I<br>R.LRGIDDEADVLPDQK.S<br>K.VPVDGIVVEGR.G<br>K.AIVLGNANFLEEYVDLGLALAEADR.L<br>R.IGDLDISVLPYAELEQNR.V<br>R.GSSLEIIVHSIAEQR.Q<br>R.ANESAPAHTEGAASGKPR.A<br>K.HGVATTPTFIEGER.I<br>R.GYDVEDWLTRETDFAK.A<br>R.GYDVEDWLTRETDFAK.A<br>R.DIESFSSMFLNYDLAK.R<br>R.ANESAPAHTEGAASGK.P<br>R.SRGGYDVEDWLTRETDFAK.A<br>R.DIESFSSMFLNYDLAK.R<br>K.LRDIESFSSMFLNYDLAK.R<br>R.SRGGYDVEDWLTRETDFAK.A<br>R.EETDAFAK.A<br>R.APIGGVVQTLNAR.A<br>R.AGVTLASGQTLAEISGLGTVWNAALPEAQAGLVK.I<br>R.VALPATAAOSR.T<br>R.LAPGDVIGAGAPJAEQLPEWGSQAQTEYLSVK.K<br>K.SDAPTETASGGR.K<br>K.IGQPATANLAFPEGAFTGR.V<br>K.GTATVTAIDSAK.G<br>K.VGDKVAFELDWNGK.A<br>K.VAFELDWNGK.A<br>K.HGKGTATVTAIDSAK.G<br>K.AGTITKLDK.A<br>R.TKDFEAVPVVLDGR.A<br>R.IAITAPISGVVIAR.S<br>K.LVPAIALLDNR.A<br>K.LLLAATPLFLAAGGGETAKPADEHGEAEAGHDEGK.I<br>R.AGVPTLDQVAVTR.T<br>R.LAALDSLTELAEALER.N<br>K.LLEPTAVDQVPGK.G<br>R.YHGGAEASAPPPK.G<br>R.VAADGSDDEIDLSEVVVGDVLR.V<br>K.TGTLTAGKPSVVAIEVAFEGFEEDLLR.I<br>R.TSEHPLAQATVQAAEQR.G<br>R.RLDIADVEADVLPDQK.S<br>R.AADGSVAVYFAAAVITVLLVQLLELRAR.E<br>R.IFQEEIFGVLVSTFTK.T<br>K.TVDEIAIANDTAYGLGAGVWTR.N<br>K.SPNIFMADVLDEDAFFDK.A<br>R.TVQQAIAANR.I<br>R.TADVPLAIDHFR.Y<br>R.GYFVQPTVFLGENR.M<br>K.NLLVSYDEHALGLF. |
| YP_617436 | Sala_2394 | Secretion protein HlyD                                                  | 20.24%            | 5                       |                                                                                                                                                                                                                                                                                                                                                                                                                                                                                                                                                                                                                                                                                                                                                                                                                                                                                                                                                                                                                                                                                                                                                                                                                                                                                                                                                                                                                                                                                                                                                                                                                                                                                                                                                                                                                                                                                                                                                                                                                                                                                                                                                                                                                                                                                                                                                                                                                                                                                                                                                                                                                                                                                                                                                                                                                                                                                                                                                                                                                                                                                                                                                                                                                                                                                                                                                                                                                                                                    |
| YP_617439 | Sala_2397 | hypothetical protein                                                    | 11.99%            | 3                       |                                                                                                                                                                                                                                                                                                                                                                                                                                                                                                                                                                                                                                                                                                                                                                                                                                                                                                                                                                                                                                                                                                                                                                                                                                                                                                                                                                                                                                                                                                                                                                                                                                                                                                                                                                                                                                                                                                                                                                                                                                                                                                                                                                                                                                                                                                                                                                                                                                                                                                                                                                                                                                                                                                                                                                                                                                                                                                                                                                                                                                                                                                                                                                                                                                                                                                                                                                                                                                                                    |
| YP_617449 | Sala_2408 | transcriptional regulator, histidine utilization repressor, GntR family | 17.29%            | 3                       |                                                                                                                                                                                                                                                                                                                                                                                                                                                                                                                                                                                                                                                                                                                                                                                                                                                                                                                                                                                                                                                                                                                                                                                                                                                                                                                                                                                                                                                                                                                                                                                                                                                                                                                                                                                                                                                                                                                                                                                                                                                                                                                                                                                                                                                                                                                                                                                                                                                                                                                                                                                                                                                                                                                                                                                                                                                                                                                                                                                                                                                                                                                                                                                                                                                                                                                                                                                                                                                                    |
| YP_617451 | Sala_2410 | uncharacterized conserved secreted or membrane protein                  | 11.11%            | 2                       |                                                                                                                                                                                                                                                                                                                                                                                                                                                                                                                                                                                                                                                                                                                                                                                                                                                                                                                                                                                                                                                                                                                                                                                                                                                                                                                                                                                                                                                                                                                                                                                                                                                                                                                                                                                                                                                                                                                                                                                                                                                                                                                                                                                                                                                                                                                                                                                                                                                                                                                                                                                                                                                                                                                                                                                                                                                                                                                                                                                                                                                                                                                                                                                                                                                                                                                                                                                                                                                                    |
| YP_617452 | Sala_2411 | TonB-dependent receptor                                                 | 47.39%            | 24                      |                                                                                                                                                                                                                                                                                                                                                                                                                                                                                                                                                                                                                                                                                                                                                                                                                                                                                                                                                                                                                                                                                                                                                                                                                                                                                                                                                                                                                                                                                                                                                                                                                                                                                                                                                                                                                                                                                                                                                                                                                                                                                                                                                                                                                                                                                                                                                                                                                                                                                                                                                                                                                                                                                                                                                                                                                                                                                                                                                                                                                                                                                                                                                                                                                                                                                                                                                                                                                                                                    |
| YP_617458 | Sala_2417 | TonB-dependent receptor, plug                                           | 7.78%             | 3                       |                                                                                                                                                                                                                                                                                                                                                                                                                                                                                                                                                                                                                                                                                                                                                                                                                                                                                                                                                                                                                                                                                                                                                                                                                                                                                                                                                                                                                                                                                                                                                                                                                                                                                                                                                                                                                                                                                                                                                                                                                                                                                                                                                                                                                                                                                                                                                                                                                                                                                                                                                                                                                                                                                                                                                                                                                                                                                                                                                                                                                                                                                                                                                                                                                                                                                                                                                                                                                                                                    |
| YP_617462 | Sala_2421 | copper resistance B precursor                                           | 11.66%            | 3                       |                                                                                                                                                                                                                                                                                                                                                                                                                                                                                                                                                                                                                                                                                                                                                                                                                                                                                                                                                                                                                                                                                                                                                                                                                                                                                                                                                                                                                                                                                                                                                                                                                                                                                                                                                                                                                                                                                                                                                                                                                                                                                                                                                                                                                                                                                                                                                                                                                                                                                                                                                                                                                                                                                                                                                                                                                                                                                                                                                                                                                                                                                                                                                                                                                                                                                                                                                                                                                                                                    |
| YP_617463 | Sala_2422 | Copper-resistance protein CopA                                          | 18.21%            | 6                       |                                                                                                                                                                                                                                                                                                                                                                                                                                                                                                                                                                                                                                                                                                                                                                                                                                                                                                                                                                                                                                                                                                                                                                                                                                                                                                                                                                                                                                                                                                                                                                                                                                                                                                                                                                                                                                                                                                                                                                                                                                                                                                                                                                                                                                                                                                                                                                                                                                                                                                                                                                                                                                                                                                                                                                                                                                                                                                                                                                                                                                                                                                                                                                                                                                                                                                                                                                                                                                                                    |
| YP_617470 | Sala_2429 | Copper-translocating P-type ATPase                                      | 15.01%            | 6                       |                                                                                                                                                                                                                                                                                                                                                                                                                                                                                                                                                                                                                                                                                                                                                                                                                                                                                                                                                                                                                                                                                                                                                                                                                                                                                                                                                                                                                                                                                                                                                                                                                                                                                                                                                                                                                                                                                                                                                                                                                                                                                                                                                                                                                                                                                                                                                                                                                                                                                                                                                                                                                                                                                                                                                                                                                                                                                                                                                                                                                                                                                                                                                                                                                                                                                                                                                                                                                                                                    |
| YP_617473 | Sala_2432 | hypothetical protein                                                    | 7.76%             | 2                       |                                                                                                                                                                                                                                                                                                                                                                                                                                                                                                                                                                                                                                                                                                                                                                                                                                                                                                                                                                                                                                                                                                                                                                                                                                                                                                                                                                                                                                                                                                                                                                                                                                                                                                                                                                                                                                                                                                                                                                                                                                                                                                                                                                                                                                                                                                                                                                                                                                                                                                                                                                                                                                                                                                                                                                                                                                                                                                                                                                                                                                                                                                                                                                                                                                                                                                                                                                                                                                                                    |
| YP_617476 | Sala_2436 | glutaredoxin                                                            | 25.09%            | 11                      |                                                                                                                                                                                                                                                                                                                                                                                                                                                                                                                                                                                                                                                                                                                                                                                                                                                                                                                                                                                                                                                                                                                                                                                                                                                                                                                                                                                                                                                                                                                                                                                                                                                                                                                                                                                                                                                                                                                                                                                                                                                                                                                                                                                                                                                                                                                                                                                                                                                                                                                                                                                                                                                                                                                                                                                                                                                                                                                                                                                                                                                                                                                                                                                                                                                                                                                                                                                                                                                                    |
| YP_617480 | Sala_2440 | Secretion protein HlyD                                                  | 30.64%            | 6                       |                                                                                                                                                                                                                                                                                                                                                                                                                                                                                                                                                                                                                                                                                                                                                                                                                                                                                                                                                                                                                                                                                                                                                                                                                                                                                                                                                                                                                                                                                                                                                                                                                                                                                                                                                                                                                                                                                                                                                                                                                                                                                                                                                                                                                                                                                                                                                                                                                                                                                                                                                                                                                                                                                                                                                                                                                                                                                                                                                                                                                                                                                                                                                                                                                                                                                                                                                                                                                                                                    |
| YP_617482 | Sala_2442 | putative copper efflux system periplasmic protein CusF                  | 31.15%            | 5                       |                                                                                                                                                                                                                                                                                                                                                                                                                                                                                                                                                                                                                                                                                                                                                                                                                                                                                                                                                                                                                                                                                                                                                                                                                                                                                                                                                                                                                                                                                                                                                                                                                                                                                                                                                                                                                                                                                                                                                                                                                                                                                                                                                                                                                                                                                                                                                                                                                                                                                                                                                                                                                                                                                                                                                                                                                                                                                                                                                                                                                                                                                                                                                                                                                                                                                                                                                                                                                                                                    |
| YP_617488 | Sala_2448 | secretion protein HlyD                                                  | 20.42%            | 4                       |                                                                                                                                                                                                                                                                                                                                                                                                                                                                                                                                                                                                                                                                                                                                                                                                                                                                                                                                                                                                                                                                                                                                                                                                                                                                                                                                                                                                                                                                                                                                                                                                                                                                                                                                                                                                                                                                                                                                                                                                                                                                                                                                                                                                                                                                                                                                                                                                                                                                                                                                                                                                                                                                                                                                                                                                                                                                                                                                                                                                                                                                                                                                                                                                                                                                                                                                                                                                                                                                    |
| YP_617489 | Sala_2449 | Heavy metal efflux pump CzcA                                            | 2.88%             | 2                       |                                                                                                                                                                                                                                                                                                                                                                                                                                                                                                                                                                                                                                                                                                                                                                                                                                                                                                                                                                                                                                                                                                                                                                                                                                                                                                                                                                                                                                                                                                                                                                                                                                                                                                                                                                                                                                                                                                                                                                                                                                                                                                                                                                                                                                                                                                                                                                                                                                                                                                                                                                                                                                                                                                                                                                                                                                                                                                                                                                                                                                                                                                                                                                                                                                                                                                                                                                                                                                                                    |
| YP_617493 | Sala_2453 | Heavy metal translocating P-type ATPase                                 | 18.30%            | 7                       |                                                                                                                                                                                                                                                                                                                                                                                                                                                                                                                                                                                                                                                                                                                                                                                                                                                                                                                                                                                                                                                                                                                                                                                                                                                                                                                                                                                                                                                                                                                                                                                                                                                                                                                                                                                                                                                                                                                                                                                                                                                                                                                                                                                                                                                                                                                                                                                                                                                                                                                                                                                                                                                                                                                                                                                                                                                                                                                                                                                                                                                                                                                                                                                                                                                                                                                                                                                                                                                                    |
| YP_617494 | Sala_2454 | Aldehyde dehydrogenase (NAD+)                                           | 38.54%            | 12                      |                                                                                                                                                                                                                                                                                                                                                                                                                                                                                                                                                                                                                                                                                                                                                                                                                                                                                                                                                                                                                                                                                                                                                                                                                                                                                                                                                                                                                                                                                                                                                                                                                                                                                                                                                                                                                                                                                                                                                                                                                                                                                                                                                                                                                                                                                                                                                                                                                                                                                                                                                                                                                                                                                                                                                                                                                                                                                                                                                                                                                                                                                                                                                                                                                                                                                                                                                                                                                                                                    |

| Accession | Locus tag | Description                                             | Sequence coverage | No. peptides identified | List of peptides identified                                                                                                                                                                                                                                                                                                                                                                                                                                                                                                                                                                                                                                                                                                                                                                                                                                                                                                                                                                                                                                                                                                                                                                                                                                                                                                                                                                                                                                                                                                                                                                                                                                                                                                                                                                                                                                                                                                                                                                                                                                                                                                                                                                                                                                                                                                                                                                                                                                                                                                                                                                                                                                                                                                                                                                                                                                                                                                                                                                                                                                                                                                                                                                                                                                                                                                                                                         |
|-----------|-----------|---------------------------------------------------------|-------------------|-------------------------|-------------------------------------------------------------------------------------------------------------------------------------------------------------------------------------------------------------------------------------------------------------------------------------------------------------------------------------------------------------------------------------------------------------------------------------------------------------------------------------------------------------------------------------------------------------------------------------------------------------------------------------------------------------------------------------------------------------------------------------------------------------------------------------------------------------------------------------------------------------------------------------------------------------------------------------------------------------------------------------------------------------------------------------------------------------------------------------------------------------------------------------------------------------------------------------------------------------------------------------------------------------------------------------------------------------------------------------------------------------------------------------------------------------------------------------------------------------------------------------------------------------------------------------------------------------------------------------------------------------------------------------------------------------------------------------------------------------------------------------------------------------------------------------------------------------------------------------------------------------------------------------------------------------------------------------------------------------------------------------------------------------------------------------------------------------------------------------------------------------------------------------------------------------------------------------------------------------------------------------------------------------------------------------------------------------------------------------------------------------------------------------------------------------------------------------------------------------------------------------------------------------------------------------------------------------------------------------------------------------------------------------------------------------------------------------------------------------------------------------------------------------------------------------------------------------------------------------------------------------------------------------------------------------------------------------------------------------------------------------------------------------------------------------------------------------------------------------------------------------------------------------------------------------------------------------------------------------------------------------------------------------------------------------------------------------------------------------------------------------------------------------|
|           |           |                                                         |                   |                         | R.WSPPAAGEYFADTSPINGALIAEFALSTPEDVER.A<br>R.ALPGGELDRGYFVQPTVFLGENR.M<br>R.AEEGGAISTIDADTIAHYFR.E<br>K.VSFTGETVTKG.Q<br>K.ALEGFTLFAFNK.G<br>R.EFGKPLVIEEAPITVPGQQLVK.V<br>R.LDLEALAFAGEGK.V<br>R.GSIVGTRLDLLEALAFAGEGK.V<br>K.VHATVHAEKLENDIVFAR.M<br>K.ATEAKPGEWVWVSCIGSLGHMAVQYAR.A<br>K.QAIDGAQGVLVTAVSPK.A<br>K.ASLELAIDR.G<br>R.IAFAAGLGR.S<br>R.LIHLVDDEFAIRK.S<br>R.ATEEAEQVR.I<br>R.SYTIASSPTQRAVVELTVK.R<br>R.QSPFFSQLPALPDDAAR.Q<br>R.AAAHAETATEQJAAVR.N<br>K.REEQGAVSR.H<br>K.ANGYLACQAKGSGK.P<br>K.ADGAEVGQTLVYVR.N<br>R.VGQVTIDHYDDHFAVHTIAEGK.L<br>K.GNVAFHR.K<br>R.VLDLDAAGQLVASVLSK.K<br>R.ACELAGALIELAGR.A<br>R.IDDALIALSSLMTSVVTAR.R<br>K.AQVALVGVSGEILR.I<br>R.NFILLDPDLGHR.L<br>R.LTDAGLVTR.E<br>R.IAQQLITETGQHDR.D<br>R.HRGLVFPDGLPVAR.I<br>K.VYVVAQAPTINR.Y<br>R.TPTLANPSGNIAPAR.L<br>R.LYDLGTGLPTGGPSR.I<br>R.YDGLDAQVDPWILASANLNLR.A<br>R.GGATSGELLADQPSVR.F<br>R.APSPVQVLFGENENSTSYEVGK.G<br>K.TDDEQAPTQDR.V<br>R.DLIATSQQNFAEALAEYK.A<br>R.STDIVAHAPTLPADLVAAAGAGDQR.L<br>K.ALVDPAAELFK.G<br>R.GYLDVSNAPLAADPGTK.F<br>K.SLVGLMAAAVQDR.L<br>K.GSDANPAYGLTWLPR.A<br>K.FOYGPAPMQIIEIIR.R<br>R.VPQVTAIVSAAK.T<br>K.TSTAJIAJATTNAGVPSR.V<br>K.THTATVYDDAK.T<br>R.IVATGTRPAVPAIPGLPDVDALDSTTALDLTELPSK.S<br>R.APNVEDLGLIEAGVK.Q<br>K.VIAEKDSLVSGLR.Q<br>R.GVYAAAGDVTGR.D<br>R.NGVAEITVAER.L<br>K.TAEGGTALTCLR.N<br>R.YDNSAMPVAVFSDPQVAVSFGFTEAQIAAGYATR.T<br>K.YADLLPLNINIAHHEGTAR.L<br>K.LLGAHILAPEGADSIQTAAMAIR.C<br>R.TSTLLENVPR.A<br>R.LVNGVEAGGR.R<br>R.LLDPEPEFGAALTDYLSSEGTIVLDLQYSAHK.T<br>R.AGVDTVTLVFR.S<br>R.KLLGAHILAPEGADSIQTAAMAIR.C<br>R.GVYAAAGDVTGRDQFVYMAAGAK.I<br>R.IAGPLGLPETVLVPLVR.H<br>K.SLQATIDQNAQPAK.L<br>R.GSWAYWHLAGLGGHSLDASLYSDR.T<br>R.AYSKPTLTYQIAHLR.A<br>R.ANGMIVADEPAEAWLR.H<br>R.IEGADLLWAAHVEELGR.A<br>K.TLHTPVNFVHTLQEVNDGLAHGR.Y<br>K.TGTLTGKSPVTNVAEGFDENEILR.L<br>R.DJAVPEVSDPDSPTGK.G<br>K.VPVDVIEEGR.S<br>R.FLEESGVTDALSDQADSLRR.D<br>R.RLGDIEVEAEVLPDQK.S<br>R.ASEHPLALAVVAAAQER.D<br>R.ALLNAPK.T<br>R.IEKVDTLVDK.T<br>R.VRPGKVPVDAIVEEGR.S<br>R.SALDESMVTGESMPVTK.S<br>R.LSEATMSNIR.Q<br>K.SIGDHVIGGTLNQSGALVVR.A<br>K.GDLNGIARAR.R<br>K.AAGVTLDHSPPEAK.W<br>K.DGSGEVTAIQK.Q<br>K.ARPELDSVK.V<br>K.TESDETTAANSATEAAPDK.G<br>K.VAFDLALKDGSGEVTAIQK.Q<br>K.GNGVTIADKAGVTLDHSGPIPEAK.W<br>K.GNGVTIADK.A<br>R.VGEPVTTISQLQSGSAALLVPQSAVQTVVEGR.S<br>K.AELGKGEAEHGH.<br>R.VSPEQDLIAR.T<br>R.VDFVSPILDEATR.L<br>R.LAQQVSAAGGGGALNR.I<br>R.IAIAAPLSGQVVAR.S<br>R.TAQDWIVAPLLK.N<br>R.LAALGLNLTDLAR.A<br>R.ALEENNVGVGAGVDR.G<br>R.VEQTEGLPMLDIR.P<br>R.LGITAQTVQDTSIAIGGR.D<br>R.DAAQJAAAR.T<br>R.AGETLAVQSR.D<br>R.ADYEQAQAEAAATAEAR.R<br>R.GVPPVTVQIANVK.I<br>R.DAGSFVQEAQAK.I<br>K.LVNATVGTVER.N<br>R.TVQDWIVSPQK.A<br>R.IVAQDVSAKL.<br>K.AVPQVAGVDSIGGYAK.T<br>K.ANLAVGANFFNR.G<br>K.AAGGQLGQLYESQPIELR.F<br>R.LKALGIQR.M<br>R.LDIPLLPEIEEADRCIGR.L<br>K.TGTLTEGRR.I<br>K.GAGAALTEK.Y<br>K.TPVNFIVHTLQEVNDGLAHGR.Y<br>R.ISTEQLEWLAAR.V<br>R.LTALEQDVAR.E<br>R.LKDAFLMHQATER.L<br>R.VVQIFEEFDALALATHQWK.K<br>R.TGLDHLPAQK.R<br>R.LTALEQDVAREGS.<br>K.EYFDEWMPAASGMLETAK.F<br>R.FLDWFETAAPDPVLK.A<br>R.WSDQQLAQPLAAR.H<br>R.EGRNPTSTGETIQAASK.K<br>R.NPSTGETIQAASK.K<br>R.NPSTGETIQAASK.L<br>R.KYVDGFAAIAADAAK.G<br>K.YVDGFAAIAADAAK.G<br>R.AALSPYGGLLTFLGASAR.G<br>R.LKPVLLAFAGPTLTGDFVPEFAAIDPIGAR.L<br>R.TSQALPYLVAWLQR.D<br>R.LGKDEWEIGASCDPVAVGAFVALEK.A<br>R.GATYESSQVLEGLASGLDQK.A<br>R.EALVQADAVSDILLADAMAAMAR.L |
| YP_617495 | Sala_2455 | Alcohol dehydrogenase GroES-like protein                | 31.67%            | 6                       |                                                                                                                                                                                                                                                                                                                                                                                                                                                                                                                                                                                                                                                                                                                                                                                                                                                                                                                                                                                                                                                                                                                                                                                                                                                                                                                                                                                                                                                                                                                                                                                                                                                                                                                                                                                                                                                                                                                                                                                                                                                                                                                                                                                                                                                                                                                                                                                                                                                                                                                                                                                                                                                                                                                                                                                                                                                                                                                                                                                                                                                                                                                                                                                                                                                                                                                                                                                     |
| YP_617500 | Sala_2460 | two component transcriptional regulator, LuxR family    | 19.52%            | 4                       |                                                                                                                                                                                                                                                                                                                                                                                                                                                                                                                                                                                                                                                                                                                                                                                                                                                                                                                                                                                                                                                                                                                                                                                                                                                                                                                                                                                                                                                                                                                                                                                                                                                                                                                                                                                                                                                                                                                                                                                                                                                                                                                                                                                                                                                                                                                                                                                                                                                                                                                                                                                                                                                                                                                                                                                                                                                                                                                                                                                                                                                                                                                                                                                                                                                                                                                                                                                     |
| YP_617508 | Sala_2468 | Oxidoreductase FAD-binding region                       | 12.48%            | 5                       |                                                                                                                                                                                                                                                                                                                                                                                                                                                                                                                                                                                                                                                                                                                                                                                                                                                                                                                                                                                                                                                                                                                                                                                                                                                                                                                                                                                                                                                                                                                                                                                                                                                                                                                                                                                                                                                                                                                                                                                                                                                                                                                                                                                                                                                                                                                                                                                                                                                                                                                                                                                                                                                                                                                                                                                                                                                                                                                                                                                                                                                                                                                                                                                                                                                                                                                                                                                     |
| YP_617511 | Sala_2471 | hypothetical protein                                    | 37.50%            | 3                       |                                                                                                                                                                                                                                                                                                                                                                                                                                                                                                                                                                                                                                                                                                                                                                                                                                                                                                                                                                                                                                                                                                                                                                                                                                                                                                                                                                                                                                                                                                                                                                                                                                                                                                                                                                                                                                                                                                                                                                                                                                                                                                                                                                                                                                                                                                                                                                                                                                                                                                                                                                                                                                                                                                                                                                                                                                                                                                                                                                                                                                                                                                                                                                                                                                                                                                                                                                                     |
| YP_617513 | Sala_2473 | Pyrimidine nucleoside phosphorylase-like protein        | 6.03%             | 2                       |                                                                                                                                                                                                                                                                                                                                                                                                                                                                                                                                                                                                                                                                                                                                                                                                                                                                                                                                                                                                                                                                                                                                                                                                                                                                                                                                                                                                                                                                                                                                                                                                                                                                                                                                                                                                                                                                                                                                                                                                                                                                                                                                                                                                                                                                                                                                                                                                                                                                                                                                                                                                                                                                                                                                                                                                                                                                                                                                                                                                                                                                                                                                                                                                                                                                                                                                                                                     |
| YP_617527 | Sala_2487 | hypothetical protein                                    | 30.00%            | 2                       |                                                                                                                                                                                                                                                                                                                                                                                                                                                                                                                                                                                                                                                                                                                                                                                                                                                                                                                                                                                                                                                                                                                                                                                                                                                                                                                                                                                                                                                                                                                                                                                                                                                                                                                                                                                                                                                                                                                                                                                                                                                                                                                                                                                                                                                                                                                                                                                                                                                                                                                                                                                                                                                                                                                                                                                                                                                                                                                                                                                                                                                                                                                                                                                                                                                                                                                                                                                     |
| YP_617528 | Sala_2488 | DNA repair protein RadC                                 | 5.93%             | 2                       |                                                                                                                                                                                                                                                                                                                                                                                                                                                                                                                                                                                                                                                                                                                                                                                                                                                                                                                                                                                                                                                                                                                                                                                                                                                                                                                                                                                                                                                                                                                                                                                                                                                                                                                                                                                                                                                                                                                                                                                                                                                                                                                                                                                                                                                                                                                                                                                                                                                                                                                                                                                                                                                                                                                                                                                                                                                                                                                                                                                                                                                                                                                                                                                                                                                                                                                                                                                     |
| YP_617530 | Sala_2490 | Type IV secretory pathway VirD4 components-like protein | 4.61%             | 2                       |                                                                                                                                                                                                                                                                                                                                                                                                                                                                                                                                                                                                                                                                                                                                                                                                                                                                                                                                                                                                                                                                                                                                                                                                                                                                                                                                                                                                                                                                                                                                                                                                                                                                                                                                                                                                                                                                                                                                                                                                                                                                                                                                                                                                                                                                                                                                                                                                                                                                                                                                                                                                                                                                                                                                                                                                                                                                                                                                                                                                                                                                                                                                                                                                                                                                                                                                                                                     |
| YP_617545 | Sala_2505 | TonB-dependent receptor                                 | 13.79%            | 6                       |                                                                                                                                                                                                                                                                                                                                                                                                                                                                                                                                                                                                                                                                                                                                                                                                                                                                                                                                                                                                                                                                                                                                                                                                                                                                                                                                                                                                                                                                                                                                                                                                                                                                                                                                                                                                                                                                                                                                                                                                                                                                                                                                                                                                                                                                                                                                                                                                                                                                                                                                                                                                                                                                                                                                                                                                                                                                                                                                                                                                                                                                                                                                                                                                                                                                                                                                                                                     |
| YP_617547 | Sala_2507 | transcriptional regulator, GntR family                  | 11.65%            | 2                       |                                                                                                                                                                                                                                                                                                                                                                                                                                                                                                                                                                                                                                                                                                                                                                                                                                                                                                                                                                                                                                                                                                                                                                                                                                                                                                                                                                                                                                                                                                                                                                                                                                                                                                                                                                                                                                                                                                                                                                                                                                                                                                                                                                                                                                                                                                                                                                                                                                                                                                                                                                                                                                                                                                                                                                                                                                                                                                                                                                                                                                                                                                                                                                                                                                                                                                                                                                                     |
| YP_617548 | Sala_2508 | beta-lactamase                                          | 30.06%            | 6                       |                                                                                                                                                                                                                                                                                                                                                                                                                                                                                                                                                                                                                                                                                                                                                                                                                                                                                                                                                                                                                                                                                                                                                                                                                                                                                                                                                                                                                                                                                                                                                                                                                                                                                                                                                                                                                                                                                                                                                                                                                                                                                                                                                                                                                                                                                                                                                                                                                                                                                                                                                                                                                                                                                                                                                                                                                                                                                                                                                                                                                                                                                                                                                                                                                                                                                                                                                                                     |
| YP_617551 | Sala_2511 | Mercuric transport protein periplasmic component        | 42.42%            | 3                       |                                                                                                                                                                                                                                                                                                                                                                                                                                                                                                                                                                                                                                                                                                                                                                                                                                                                                                                                                                                                                                                                                                                                                                                                                                                                                                                                                                                                                                                                                                                                                                                                                                                                                                                                                                                                                                                                                                                                                                                                                                                                                                                                                                                                                                                                                                                                                                                                                                                                                                                                                                                                                                                                                                                                                                                                                                                                                                                                                                                                                                                                                                                                                                                                                                                                                                                                                                                     |
| YP_617552 | Sala_2512 | Mercuric reductase MerA                                 | 53.03%            | 15                      |                                                                                                                                                                                                                                                                                                                                                                                                                                                                                                                                                                                                                                                                                                                                                                                                                                                                                                                                                                                                                                                                                                                                                                                                                                                                                                                                                                                                                                                                                                                                                                                                                                                                                                                                                                                                                                                                                                                                                                                                                                                                                                                                                                                                                                                                                                                                                                                                                                                                                                                                                                                                                                                                                                                                                                                                                                                                                                                                                                                                                                                                                                                                                                                                                                                                                                                                                                                     |
| YP_617554 | Sala_2514 | Abi-like protein                                        | 30.26%            | 5                       |                                                                                                                                                                                                                                                                                                                                                                                                                                                                                                                                                                                                                                                                                                                                                                                                                                                                                                                                                                                                                                                                                                                                                                                                                                                                                                                                                                                                                                                                                                                                                                                                                                                                                                                                                                                                                                                                                                                                                                                                                                                                                                                                                                                                                                                                                                                                                                                                                                                                                                                                                                                                                                                                                                                                                                                                                                                                                                                                                                                                                                                                                                                                                                                                                                                                                                                                                                                     |
| YP_617555 | Sala_2515 | hypothetical protein                                    | 13.64%            | 2                       |                                                                                                                                                                                                                                                                                                                                                                                                                                                                                                                                                                                                                                                                                                                                                                                                                                                                                                                                                                                                                                                                                                                                                                                                                                                                                                                                                                                                                                                                                                                                                                                                                                                                                                                                                                                                                                                                                                                                                                                                                                                                                                                                                                                                                                                                                                                                                                                                                                                                                                                                                                                                                                                                                                                                                                                                                                                                                                                                                                                                                                                                                                                                                                                                                                                                                                                                                                                     |
| YP_617583 | Sala_2544 | Heavy metal translocating P-type ATPase                 | 24.14%            | 13                      |                                                                                                                                                                                                                                                                                                                                                                                                                                                                                                                                                                                                                                                                                                                                                                                                                                                                                                                                                                                                                                                                                                                                                                                                                                                                                                                                                                                                                                                                                                                                                                                                                                                                                                                                                                                                                                                                                                                                                                                                                                                                                                                                                                                                                                                                                                                                                                                                                                                                                                                                                                                                                                                                                                                                                                                                                                                                                                                                                                                                                                                                                                                                                                                                                                                                                                                                                                                     |
| YP_617590 | Sala_2551 | hypothetical protein                                    | 63.24%            | 7                       |                                                                                                                                                                                                                                                                                                                                                                                                                                                                                                                                                                                                                                                                                                                                                                                                                                                                                                                                                                                                                                                                                                                                                                                                                                                                                                                                                                                                                                                                                                                                                                                                                                                                                                                                                                                                                                                                                                                                                                                                                                                                                                                                                                                                                                                                                                                                                                                                                                                                                                                                                                                                                                                                                                                                                                                                                                                                                                                                                                                                                                                                                                                                                                                                                                                                                                                                                                                     |
| YP_617607 | Sala_2568 | Secretion protein HlyD                                  | 25.71%            | 6                       |                                                                                                                                                                                                                                                                                                                                                                                                                                                                                                                                                                                                                                                                                                                                                                                                                                                                                                                                                                                                                                                                                                                                                                                                                                                                                                                                                                                                                                                                                                                                                                                                                                                                                                                                                                                                                                                                                                                                                                                                                                                                                                                                                                                                                                                                                                                                                                                                                                                                                                                                                                                                                                                                                                                                                                                                                                                                                                                                                                                                                                                                                                                                                                                                                                                                                                                                                                                     |
| YP_617608 | Sala_2569 | Heavy metal efflux pump CzcA                            | 6.77%             | 5                       |                                                                                                                                                                                                                                                                                                                                                                                                                                                                                                                                                                                                                                                                                                                                                                                                                                                                                                                                                                                                                                                                                                                                                                                                                                                                                                                                                                                                                                                                                                                                                                                                                                                                                                                                                                                                                                                                                                                                                                                                                                                                                                                                                                                                                                                                                                                                                                                                                                                                                                                                                                                                                                                                                                                                                                                                                                                                                                                                                                                                                                                                                                                                                                                                                                                                                                                                                                                     |
| YP_617617 | Sala_2578 | secretion protein HlyD                                  | 9.87%             | 3                       |                                                                                                                                                                                                                                                                                                                                                                                                                                                                                                                                                                                                                                                                                                                                                                                                                                                                                                                                                                                                                                                                                                                                                                                                                                                                                                                                                                                                                                                                                                                                                                                                                                                                                                                                                                                                                                                                                                                                                                                                                                                                                                                                                                                                                                                                                                                                                                                                                                                                                                                                                                                                                                                                                                                                                                                                                                                                                                                                                                                                                                                                                                                                                                                                                                                                                                                                                                                     |
| YP_617618 | Sala_2579 | Heavy metal efflux pump CzcA                            | 9.71%             | 8                       |                                                                                                                                                                                                                                                                                                                                                                                                                                                                                                                                                                                                                                                                                                                                                                                                                                                                                                                                                                                                                                                                                                                                                                                                                                                                                                                                                                                                                                                                                                                                                                                                                                                                                                                                                                                                                                                                                                                                                                                                                                                                                                                                                                                                                                                                                                                                                                                                                                                                                                                                                                                                                                                                                                                                                                                                                                                                                                                                                                                                                                                                                                                                                                                                                                                                                                                                                                                     |
| YP_617621 | Sala_2582 | Heavy metal translocating P-type ATPase                 | 5.66%             | 4                       |                                                                                                                                                                                                                                                                                                                                                                                                                                                                                                                                                                                                                                                                                                                                                                                                                                                                                                                                                                                                                                                                                                                                                                                                                                                                                                                                                                                                                                                                                                                                                                                                                                                                                                                                                                                                                                                                                                                                                                                                                                                                                                                                                                                                                                                                                                                                                                                                                                                                                                                                                                                                                                                                                                                                                                                                                                                                                                                                                                                                                                                                                                                                                                                                                                                                                                                                                                                     |
| YP_617634 | Sala_2595 | hypothetical protein                                    | 35.16%            | 8                       |                                                                                                                                                                                                                                                                                                                                                                                                                                                                                                                                                                                                                                                                                                                                                                                                                                                                                                                                                                                                                                                                                                                                                                                                                                                                                                                                                                                                                                                                                                                                                                                                                                                                                                                                                                                                                                                                                                                                                                                                                                                                                                                                                                                                                                                                                                                                                                                                                                                                                                                                                                                                                                                                                                                                                                                                                                                                                                                                                                                                                                                                                                                                                                                                                                                                                                                                                                                     |
| YP_617655 | Sala_2616 | filamentation induced by cAMP protein Fic               | 7.88%             | 2                       |                                                                                                                                                                                                                                                                                                                                                                                                                                                                                                                                                                                                                                                                                                                                                                                                                                                                                                                                                                                                                                                                                                                                                                                                                                                                                                                                                                                                                                                                                                                                                                                                                                                                                                                                                                                                                                                                                                                                                                                                                                                                                                                                                                                                                                                                                                                                                                                                                                                                                                                                                                                                                                                                                                                                                                                                                                                                                                                                                                                                                                                                                                                                                                                                                                                                                                                                                                                     |
| YP_617671 | Sala_2632 | histone-like DNA-binding protein                        | 52.75%            | 5                       |                                                                                                                                                                                                                                                                                                                                                                                                                                                                                                                                                                                                                                                                                                                                                                                                                                                                                                                                                                                                                                                                                                                                                                                                                                                                                                                                                                                                                                                                                                                                                                                                                                                                                                                                                                                                                                                                                                                                                                                                                                                                                                                                                                                                                                                                                                                                                                                                                                                                                                                                                                                                                                                                                                                                                                                                                                                                                                                                                                                                                                                                                                                                                                                                                                                                                                                                                                                     |
| YP_617673 | Sala_2635 | hypothetical protein                                    | 19.66%            | 6                       |                                                                                                                                                                                                                                                                                                                                                                                                                                                                                                                                                                                                                                                                                                                                                                                                                                                                                                                                                                                                                                                                                                                                                                                                                                                                                                                                                                                                                                                                                                                                                                                                                                                                                                                                                                                                                                                                                                                                                                                                                                                                                                                                                                                                                                                                                                                                                                                                                                                                                                                                                                                                                                                                                                                                                                                                                                                                                                                                                                                                                                                                                                                                                                                                                                                                                                                                                                                     |

| Accession | Locus tag | Description                                                     | Sequence coverage | No. peptides identified | List of peptides identified                                                                                                                                                                                                                                                                                                                                                                                                                                                                                                                                                                                                                                                                                                                                                                                                                                                                                                                                                                                                                                                                                                                                                                                                                                                                                                                                                                                                                                                                                                                                                                                                                                                                                                                                                                                                                                                                                                                                                                                                                                                                                                                                                                                                                                                                                                                                                                                                                                                                                                                                                                                                                                                                                                                                                                                                                                                                                                                                                                                                                                                                                                                                                                                                                                                                                                                                                                                                   |
|-----------|-----------|-----------------------------------------------------------------|-------------------|-------------------------|-------------------------------------------------------------------------------------------------------------------------------------------------------------------------------------------------------------------------------------------------------------------------------------------------------------------------------------------------------------------------------------------------------------------------------------------------------------------------------------------------------------------------------------------------------------------------------------------------------------------------------------------------------------------------------------------------------------------------------------------------------------------------------------------------------------------------------------------------------------------------------------------------------------------------------------------------------------------------------------------------------------------------------------------------------------------------------------------------------------------------------------------------------------------------------------------------------------------------------------------------------------------------------------------------------------------------------------------------------------------------------------------------------------------------------------------------------------------------------------------------------------------------------------------------------------------------------------------------------------------------------------------------------------------------------------------------------------------------------------------------------------------------------------------------------------------------------------------------------------------------------------------------------------------------------------------------------------------------------------------------------------------------------------------------------------------------------------------------------------------------------------------------------------------------------------------------------------------------------------------------------------------------------------------------------------------------------------------------------------------------------------------------------------------------------------------------------------------------------------------------------------------------------------------------------------------------------------------------------------------------------------------------------------------------------------------------------------------------------------------------------------------------------------------------------------------------------------------------------------------------------------------------------------------------------------------------------------------------------------------------------------------------------------------------------------------------------------------------------------------------------------------------------------------------------------------------------------------------------------------------------------------------------------------------------------------------------------------------------------------------------------------------------------------------------|
| YP_617675 | Sala_2637 | helicase-like protein                                           | 10.80%            | 12                      | R.LSATPVSVGLQFFPATER.V<br>R.SLLLEAVPTLVR.R<br>R.LLDPGGATNVSQTFGR.R<br>R.NLFSLSLPEVR.V<br>R.LSSATDDGGTIVTAGTGGSK.T<br>R.IPPDLFTTTEILNQR.L<br>R.IELKDKQFAEAFR.M<br>R.QLFFNK.P<br>R.LVADAGEAR.L<br>R.GVQJATTER.L<br>R.ASLSTTIQTSMLLPR.L<br>K.LTQLVQDAATIDDLR.S<br>R.AAFQAEVLSALGQVQFR.V<br>K.NSAAEAEQFGR.A<br>R.SEVATFGASLPADPK.A<br>R.AAANSEALLSFTSEVQTWLESR.N<br>K.AAIALDLTVSQHEAAWNTLAASDIPSSVAFIR.A<br>K.LVIPGTLVQETAALQVLR.A<br>K.EDLLIEQWIGGQLDQSIANNLR.L<br>R.RGAVDAGTALVAAQAFDVTDDNIGATSSQLDAK.H<br>R.EAVADAGIGTSTTGR.V<br>R.GAVDAGTALVAAQAFDVTDDNIGATSSQLDAK.H<br>R.NVASKEDLLIEQWIGGQLDQSIANNLR.L<br>R.DAIDLIELDPAVHLPLAIR.I<br>R.AAFEVPEIPGADAKTQPTDPTLEAPQR.N<br>R.LAAIFPVFETGSVR.Q<br>R.GGDDDGESTTTLFNTLAEAR.R<br>R.AIESALPAIFSEGNDLPIEQFMTR.L<br>K.LAFVSDLPALASR.L<br>R.LLVSYDPGELAR.N<br>K.VITLGPQPFMDRVLK.F<br>R.QTLSEQPAVLDAITAATLAAADLQR.R<br>R.SAAVDSLVGDGPGVPLLAAR.Y<br>R.SISDVQLDDDFETR.A<br>R.LLLESDPDSAGVLR.Q<br>R.ISDYLQENGLVTEVR.F<br>R.IVELNPAWAAR.L<br>R.LGPDHKLDSVLGQVSETALTR.D<br>R.NLLFFTLAALASR.R<br>K.LDLSVLGQVSETALTR.D<br>R.TIAVPVGVSDALETQR.E<br>R.AGIVTDNALLIETMK.A<br>R.AEQAGGTSVFAFFLYGADINR.V<br>R.AAWIVDQQR.S<br>R.RAVWISVSDR.L<br>R.LTVIDK.L<br>K.AMGLISEIVSWK.L<br>R.DAAADNLLHIAADRQWEGGAR.A<br>R.AVEIAPLLEMGENVLAEGDGR.A<br>R.ATSIFQJAEIAPDAAAAGGLLR.A<br>R.FDLAAAQIGVQR.D<br>R.FIASQFVQSIPTVYVAFQGPVANLTNR.S<br>R.AMLLAGDVAQAQVLDLPAEMADDPATAQAK.L<br>K.AMLDQLLAQLPIESATK.D<br>K.AMLDQLLAQLPIESATK.DR.A<br>K.LLALFEAVGLEDAWVSAQR.R<br>K.VAADYADRGVVLAK.V<br>K.VAADYADR.G<br>R.DAAADNLLHIAADR.D<br>K.AMLDQLLAQLPIESATK.DR.A<br>K.DRAVEIAPLLEMGENVLAEGDGR.A<br>K.AMLDQLLAQLPIESATK.D<br>K.QALLEATPIDAR.A<br>R.QGYVVDWDSVGLDDATLVNGIAQVAFDAAAQ.Q<br>R.AELVQLMVFGR.F<br>R.YSAMVQVLR.D<br>R.FDSDDGRATLQ.<br>R.LAAPLLVAEGR.R<br>R.LGLDLGDAALLAR.Y<br>R.VALVGDAAGHPIAGQGLNLGLR.D<br>R.DVAALTEVLVEGAR.L<br>R.GLDNLMVSLATDGLTR.L<br>R.RFFMDEARGEAGALPR.L<br>K.VGDGAPDSGR.G<br>R.GQGRPDYVESVTEDEPDDGGFALEGAPAGDSDAER.M<br>R.VSNLADDIAR.N<br>R.LLESVLEDFQVK.G<br>R.TILGEAQAQLLKG.G<br>R.ESVVLHEIIGSALFQDHGGSPLIILGN.K<br>R.IHGPFVSDEVR.A<br>R.TVIGIELPNAHR.E<br>R.PAGQIDKAALER.N<br>R.DVITDQYQQR.<br>R.FWVAVADSAPR.W<br>R.GWVALDSQNNR.T<br>K.NSPLGALLDPRDLAK.Y<br>K.GVPMMLVGDGSR.L<br>R.LTVIDYVR.Q<br>R.LRGWVALDSQNNR.T<br>K.ASDTMTADPVTQDR.N<br>K.NSPLGALLDPRR.D<br>R.QVQSWPVK.N<br>R.TRIDLSNQR.F<br>R.TSIASWNINSVR.A<br>K.ALLVDVSHPTPIEVETLAR.L<br>R.KYDWQANGEAR.H<br>R.LQAASDWDLGR.H<br>R.LDNVYIPAGGDIPDREINPK.F<br>R.HIGVTLPSGVR.L<br>R.SWERSPDHVPILTEFAF.<br>R.MTDWSSGGLNGTPTVLTGDFNVAPLASDVWNHK.A<br>R.AKDWASNR.G<br>K.YDWQANGEAR.H<br>K.AMFEALGYGHVTHGQR.M<br>R.LASAADTVAALAJADPALDLANPLK.GPFR.T<br>R.AVALQDQGYDVTANLR.L<br>R.AHDVATLLDPAAR.L<br>R.LPWAASETAEIVAFR.S<br>R.LASAADTVAALAJADPALDLANPLK.G<br>R.HAGLLPAFFVR.A<br>R.TILVDDEKLATQGLQLR.L<br>R.AFEAQVADVLKPVPEPR.L<br>R.LEAHPDVEVDTAQNGR.E<br>R.STVNLVSQVK.Q<br>K.TVLAEVAPEAVEEFSEHAAEAPTADRYEK.M<br>R.VDVSIER.I<br>R.SYRDVVAR.F<br>R.LPILLSLQPLIENAIK.Y<br>R.ITVSDTGAGLSGDRDPTTGVAESTGVGLANIR.D<br>R.YTLANEPTAQVTLAQEITLK.L<br>R.TDPTTGVATESTGVGLANIR.D<br>R.ARLPILLSLQPLIENAIK.Y<br>R.AAFNGVHHEEFQQLNIAR.N<br>K.GIDLPAIALR.Q<br>K.WGAGVPSTPVLVDAR.D<br>R.SELQPLGQAR.V<br>K.HRSELQPLGQAR.V<br>R.WQEDSEGGNAR.L<br>R.DLIEILEQTHDPELLENTR.I<br>R.HVSFEQVTIIAFR.I<br>K.QGSGPDQAGWIR.D<br>R.TQLVNGDTEVILSSDKQTPQPAWLGFVATGK.A<br>R.ELLSAAGIEAEVSGR.E<br>R.ELPEAYATIGR.L<br>R.ASDSVVQAEER.L<br>K.IEAQTENER.A<br>K.GATPVDFAVAVHTGLGDR.T |
| YP_617676 | Sala_2638 | hypothetical protein                                            | 43.46%            | 5                       |                                                                                                                                                                                                                                                                                                                                                                                                                                                                                                                                                                                                                                                                                                                                                                                                                                                                                                                                                                                                                                                                                                                                                                                                                                                                                                                                                                                                                                                                                                                                                                                                                                                                                                                                                                                                                                                                                                                                                                                                                                                                                                                                                                                                                                                                                                                                                                                                                                                                                                                                                                                                                                                                                                                                                                                                                                                                                                                                                                                                                                                                                                                                                                                                                                                                                                                                                                                                                               |
| YP_617677 | Sala_2639 | hypothetical protein                                            | 14.81%            | 8                       |                                                                                                                                                                                                                                                                                                                                                                                                                                                                                                                                                                                                                                                                                                                                                                                                                                                                                                                                                                                                                                                                                                                                                                                                                                                                                                                                                                                                                                                                                                                                                                                                                                                                                                                                                                                                                                                                                                                                                                                                                                                                                                                                                                                                                                                                                                                                                                                                                                                                                                                                                                                                                                                                                                                                                                                                                                                                                                                                                                                                                                                                                                                                                                                                                                                                                                                                                                                                                               |
| YP_617678 | Sala_2640 | hypothetical protein                                            | 19.34%            | 3                       |                                                                                                                                                                                                                                                                                                                                                                                                                                                                                                                                                                                                                                                                                                                                                                                                                                                                                                                                                                                                                                                                                                                                                                                                                                                                                                                                                                                                                                                                                                                                                                                                                                                                                                                                                                                                                                                                                                                                                                                                                                                                                                                                                                                                                                                                                                                                                                                                                                                                                                                                                                                                                                                                                                                                                                                                                                                                                                                                                                                                                                                                                                                                                                                                                                                                                                                                                                                                                               |
| YP_617679 | Sala_2641 | helicase-like protein                                           | 5.17%             | 3                       |                                                                                                                                                                                                                                                                                                                                                                                                                                                                                                                                                                                                                                                                                                                                                                                                                                                                                                                                                                                                                                                                                                                                                                                                                                                                                                                                                                                                                                                                                                                                                                                                                                                                                                                                                                                                                                                                                                                                                                                                                                                                                                                                                                                                                                                                                                                                                                                                                                                                                                                                                                                                                                                                                                                                                                                                                                                                                                                                                                                                                                                                                                                                                                                                                                                                                                                                                                                                                               |
| YP_617680 | Sala_2642 | type III restriction enzyme, res subunit                        | 8.91%             | 5                       |                                                                                                                                                                                                                                                                                                                                                                                                                                                                                                                                                                                                                                                                                                                                                                                                                                                                                                                                                                                                                                                                                                                                                                                                                                                                                                                                                                                                                                                                                                                                                                                                                                                                                                                                                                                                                                                                                                                                                                                                                                                                                                                                                                                                                                                                                                                                                                                                                                                                                                                                                                                                                                                                                                                                                                                                                                                                                                                                                                                                                                                                                                                                                                                                                                                                                                                                                                                                                               |
| YP_617681 | Sala_2643 | ExsB                                                            | 19.92%            | 4                       |                                                                                                                                                                                                                                                                                                                                                                                                                                                                                                                                                                                                                                                                                                                                                                                                                                                                                                                                                                                                                                                                                                                                                                                                                                                                                                                                                                                                                                                                                                                                                                                                                                                                                                                                                                                                                                                                                                                                                                                                                                                                                                                                                                                                                                                                                                                                                                                                                                                                                                                                                                                                                                                                                                                                                                                                                                                                                                                                                                                                                                                                                                                                                                                                                                                                                                                                                                                                                               |
| YP_617686 | Sala_2648 | hypothetical protein                                            | 16.89%            | 4                       |                                                                                                                                                                                                                                                                                                                                                                                                                                                                                                                                                                                                                                                                                                                                                                                                                                                                                                                                                                                                                                                                                                                                                                                                                                                                                                                                                                                                                                                                                                                                                                                                                                                                                                                                                                                                                                                                                                                                                                                                                                                                                                                                                                                                                                                                                                                                                                                                                                                                                                                                                                                                                                                                                                                                                                                                                                                                                                                                                                                                                                                                                                                                                                                                                                                                                                                                                                                                                               |
| YP_617690 | Sala_2652 | probably methylase/helicase                                     | 2.01%             | 3                       |                                                                                                                                                                                                                                                                                                                                                                                                                                                                                                                                                                                                                                                                                                                                                                                                                                                                                                                                                                                                                                                                                                                                                                                                                                                                                                                                                                                                                                                                                                                                                                                                                                                                                                                                                                                                                                                                                                                                                                                                                                                                                                                                                                                                                                                                                                                                                                                                                                                                                                                                                                                                                                                                                                                                                                                                                                                                                                                                                                                                                                                                                                                                                                                                                                                                                                                                                                                                                               |
| YP_617703 | Sala_2665 | thioredoxin-related                                             | 65.35%            | 15                      |                                                                                                                                                                                                                                                                                                                                                                                                                                                                                                                                                                                                                                                                                                                                                                                                                                                                                                                                                                                                                                                                                                                                                                                                                                                                                                                                                                                                                                                                                                                                                                                                                                                                                                                                                                                                                                                                                                                                                                                                                                                                                                                                                                                                                                                                                                                                                                                                                                                                                                                                                                                                                                                                                                                                                                                                                                                                                                                                                                                                                                                                                                                                                                                                                                                                                                                                                                                                                               |
| YP_617704 | Sala_2666 | peptidase S16, lon-like protein                                 | 37.04%            | 5                       |                                                                                                                                                                                                                                                                                                                                                                                                                                                                                                                                                                                                                                                                                                                                                                                                                                                                                                                                                                                                                                                                                                                                                                                                                                                                                                                                                                                                                                                                                                                                                                                                                                                                                                                                                                                                                                                                                                                                                                                                                                                                                                                                                                                                                                                                                                                                                                                                                                                                                                                                                                                                                                                                                                                                                                                                                                                                                                                                                                                                                                                                                                                                                                                                                                                                                                                                                                                                                               |
| YP_617706 | Sala_2668 | Ubiquinone biosynthesis hydroxylase, UbiH/UbiF/VisC/COQ6 family | 25.18%            | 7                       |                                                                                                                                                                                                                                                                                                                                                                                                                                                                                                                                                                                                                                                                                                                                                                                                                                                                                                                                                                                                                                                                                                                                                                                                                                                                                                                                                                                                                                                                                                                                                                                                                                                                                                                                                                                                                                                                                                                                                                                                                                                                                                                                                                                                                                                                                                                                                                                                                                                                                                                                                                                                                                                                                                                                                                                                                                                                                                                                                                                                                                                                                                                                                                                                                                                                                                                                                                                                                               |
| YP_617707 | Sala_2669 | cell divisionFtsK/SpoIIIE                                       | 18.31%            | 9                       |                                                                                                                                                                                                                                                                                                                                                                                                                                                                                                                                                                                                                                                                                                                                                                                                                                                                                                                                                                                                                                                                                                                                                                                                                                                                                                                                                                                                                                                                                                                                                                                                                                                                                                                                                                                                                                                                                                                                                                                                                                                                                                                                                                                                                                                                                                                                                                                                                                                                                                                                                                                                                                                                                                                                                                                                                                                                                                                                                                                                                                                                                                                                                                                                                                                                                                                                                                                                                               |
| YP_617708 | Sala_2670 | outer membrane lipoprotein carrier protein LolA                 | 44.66%            | 10                      |                                                                                                                                                                                                                                                                                                                                                                                                                                                                                                                                                                                                                                                                                                                                                                                                                                                                                                                                                                                                                                                                                                                                                                                                                                                                                                                                                                                                                                                                                                                                                                                                                                                                                                                                                                                                                                                                                                                                                                                                                                                                                                                                                                                                                                                                                                                                                                                                                                                                                                                                                                                                                                                                                                                                                                                                                                                                                                                                                                                                                                                                                                                                                                                                                                                                                                                                                                                                                               |
| YP_617709 | Sala_2671 | exodeoxyribonuclease III (xth)                                  | 60.23%            | 11                      |                                                                                                                                                                                                                                                                                                                                                                                                                                                                                                                                                                                                                                                                                                                                                                                                                                                                                                                                                                                                                                                                                                                                                                                                                                                                                                                                                                                                                                                                                                                                                                                                                                                                                                                                                                                                                                                                                                                                                                                                                                                                                                                                                                                                                                                                                                                                                                                                                                                                                                                                                                                                                                                                                                                                                                                                                                                                                                                                                                                                                                                                                                                                                                                                                                                                                                                                                                                                                               |
| YP_617710 | Sala_2672 | GTP cyclohydrolase II                                           | 28.33%            | 6                       |                                                                                                                                                                                                                                                                                                                                                                                                                                                                                                                                                                                                                                                                                                                                                                                                                                                                                                                                                                                                                                                                                                                                                                                                                                                                                                                                                                                                                                                                                                                                                                                                                                                                                                                                                                                                                                                                                                                                                                                                                                                                                                                                                                                                                                                                                                                                                                                                                                                                                                                                                                                                                                                                                                                                                                                                                                                                                                                                                                                                                                                                                                                                                                                                                                                                                                                                                                                                                               |
| YP_617711 | Sala_2673 | response regulator receiver protein                             | 40.30%            | 7                       |                                                                                                                                                                                                                                                                                                                                                                                                                                                                                                                                                                                                                                                                                                                                                                                                                                                                                                                                                                                                                                                                                                                                                                                                                                                                                                                                                                                                                                                                                                                                                                                                                                                                                                                                                                                                                                                                                                                                                                                                                                                                                                                                                                                                                                                                                                                                                                                                                                                                                                                                                                                                                                                                                                                                                                                                                                                                                                                                                                                                                                                                                                                                                                                                                                                                                                                                                                                                                               |
| YP_617712 | Sala_2674 | signal transduction histidine kinase, LytS                      | 19.25%            | 5                       |                                                                                                                                                                                                                                                                                                                                                                                                                                                                                                                                                                                                                                                                                                                                                                                                                                                                                                                                                                                                                                                                                                                                                                                                                                                                                                                                                                                                                                                                                                                                                                                                                                                                                                                                                                                                                                                                                                                                                                                                                                                                                                                                                                                                                                                                                                                                                                                                                                                                                                                                                                                                                                                                                                                                                                                                                                                                                                                                                                                                                                                                                                                                                                                                                                                                                                                                                                                                                               |
| YP_617713 | Sala_2675 | transcriptional regulator, HxIR family                          | 34.30%            | 5                       |                                                                                                                                                                                                                                                                                                                                                                                                                                                                                                                                                                                                                                                                                                                                                                                                                                                                                                                                                                                                                                                                                                                                                                                                                                                                                                                                                                                                                                                                                                                                                                                                                                                                                                                                                                                                                                                                                                                                                                                                                                                                                                                                                                                                                                                                                                                                                                                                                                                                                                                                                                                                                                                                                                                                                                                                                                                                                                                                                                                                                                                                                                                                                                                                                                                                                                                                                                                                                               |
| YP_617715 | Sala_2677 | (p)ppGpp synthetase I, SpoT/RelA                                | 23.57%            | 11                      |                                                                                                                                                                                                                                                                                                                                                                                                                                                                                                                                                                                                                                                                                                                                                                                                                                                                                                                                                                                                                                                                                                                                                                                                                                                                                                                                                                                                                                                                                                                                                                                                                                                                                                                                                                                                                                                                                                                                                                                                                                                                                                                                                                                                                                                                                                                                                                                                                                                                                                                                                                                                                                                                                                                                                                                                                                                                                                                                                                                                                                                                                                                                                                                                                                                                                                                                                                                                                               |

| Accession | Locus tag | Description                                                       | Sequence coverage | No. peptides identified | List of peptides identified                                                                                                                                                                                                                                                                                                                                                                                                                                                                                                                                                                                                                                                                                                                                                                                                                                                                                                                                                                                                                                                                                                                                                                                                                                                                                                                                                                                                                                                                                                                                                                                                                                                                                                                                                                                                                                                                                                                                                                                                                                                                                                                                                                                                                                                                                                                                                                                                                                                                                                                                                                                                                                                                                                                                                                                                                                                                                                                                                                                                                                                                                                                                                                                                                                                  |
|-----------|-----------|-------------------------------------------------------------------|-------------------|-------------------------|------------------------------------------------------------------------------------------------------------------------------------------------------------------------------------------------------------------------------------------------------------------------------------------------------------------------------------------------------------------------------------------------------------------------------------------------------------------------------------------------------------------------------------------------------------------------------------------------------------------------------------------------------------------------------------------------------------------------------------------------------------------------------------------------------------------------------------------------------------------------------------------------------------------------------------------------------------------------------------------------------------------------------------------------------------------------------------------------------------------------------------------------------------------------------------------------------------------------------------------------------------------------------------------------------------------------------------------------------------------------------------------------------------------------------------------------------------------------------------------------------------------------------------------------------------------------------------------------------------------------------------------------------------------------------------------------------------------------------------------------------------------------------------------------------------------------------------------------------------------------------------------------------------------------------------------------------------------------------------------------------------------------------------------------------------------------------------------------------------------------------------------------------------------------------------------------------------------------------------------------------------------------------------------------------------------------------------------------------------------------------------------------------------------------------------------------------------------------------------------------------------------------------------------------------------------------------------------------------------------------------------------------------------------------------------------------------------------------------------------------------------------------------------------------------------------------------------------------------------------------------------------------------------------------------------------------------------------------------------------------------------------------------------------------------------------------------------------------------------------------------------------------------------------------------------------------------------------------------------------------------------------------------|
| YP_617729 | Sala_2691 | hypothetical protein                                              | 23.50%            | 4                       | K.FLLAMSDDIR.V<br>K.AAGGLPAHGNQR.S<br>R.ANDVAEIVR.A<br>R.LIYSYSTLNKDKGQYAYGR.V<br>R.NITTFMAWNLMLHAR.L                                                                                                                                                                                                                                                                                                                                                                                                                                                                                                                                                                                                                                                                                                                                                                                                                                                                                                                                                                                                                                                                                                                                                                                                                                                                                                                                                                                                                                                                                                                                                                                                                                                                                                                                                                                                                                                                                                                                                                                                                                                                                                                                                                                                                                                                                                                                                                                                                                                                                                                                                                                                                                                                                                                                                                                                                                                                                                                                                                                                                                                                                                                                                                        |
| YP_617730 | Sala_2692 | transcriptional regulator, TetR family                            | 19.17%            | 3                       | K.RFDVGETLRA.A<br>R.GYEATSMQDLVAATGVNR.A<br>R.GHTLQELAR.V                                                                                                                                                                                                                                                                                                                                                                                                                                                                                                                                                                                                                                                                                                                                                                                                                                                                                                                                                                                                                                                                                                                                                                                                                                                                                                                                                                                                                                                                                                                                                                                                                                                                                                                                                                                                                                                                                                                                                                                                                                                                                                                                                                                                                                                                                                                                                                                                                                                                                                                                                                                                                                                                                                                                                                                                                                                                                                                                                                                                                                                                                                                                                                                                                    |
| YP_617732 | Sala_2694 | Alkylhydroperoxidase AhpD core                                    | 41.36%            | 8                       | R.SEQGGFTPVEQEVLLAISR.V<br>R.ADDADPAVSGPLQAAQK.A<br>K.IISNYSNHIFHTEVDPAFAGR.A<br>R.ADQPIADAK.L<br>R.RADDADPAVSGPLQAAQK.A<br>K.VPTEVTDAIR.A<br>K.FRSEGGFTPVEQEVLLAISR.V<br>K.VPTEVTDAIRADQPADAK.L<br>R.LAPGETASGAHAER.S<br>R.IDPLAEGEAER.A<br>R.FALAEALGLVR.S<br>K.GGGDDYDNPVAPR.L<br>R.RHVISAVGYLPLK.G<br>R.NVQIVDAPALGTVAIVTGNQVYLGSLR.L<br>R.IFGTQQLDNGDASFGENFVGNSDRYGAAR.N<br>R.VIWPITTFIDPEVAR.V<br>R.VGLSEAEAEVK.G<br>R.IVILGGGPIGSELSQAFAR.L<br>R.AIADSATTGVK.V<br>R.AVGLTLVAR.L<br>K.KIGANDESAEAFGSR.V<br>R.TGVSISAQPDVTR.A<br>R.LISSYGPALDR.R<br>R.IGAVPVVDGDAVGVIFSER.D<br>R.AVADLLAQNR.I<br>R.SGPAQAVLQTAAGYELR.C<br>R.DAALLSPASLLDQSLGR.V<br>K.TLLVAGTSPASGAVSPR.Y<br>R.EQLGDYLYPLAER.T<br>R.AGTRPATLSYLTNGLWAAVYVSLYDEK.A<br>K.QVSLDVSQVPAQK.I<br>K.GGLGALPAGTVR.F<br>R.SNAQGEAVITVINGGQSLVQDIR.Q<br>R.AQPVTLDLIQR.G<br>K.IVEFTVGGFDMTEPASAASVIK.F<br>R.RAGTETAPR.E<br>R.GDPQFIGNENIGHTPMSEGLATGLAFDVK.V<br>K.AVGETVTLK.L<br>R.TAEVGDADDEAAVAPR.R<br>R.VLTYEYLQFADHYFR.V<br>R.SERGDADAGIDTAAALPPAIGR.G<br>R.GVEDFDGHDDTDVDTGGDDGDNNGDER.S<br>R.DQESAEAPR.A<br>R.GGVQDQNR.I<br>R.TAEVGDADDEAAVAPR.P<br>R.LAVGPGALIPRDSSETLAAAVQHFGAAGPR.H<br>R.GLGDASDVALGYAR.A<br>R.ANAIALGLADR.V<br>R.ITHIPTGLVVIQQDQR.S<br>R.MATGDMAADPVAASK.E<br>R.AGTGGDEAALFAGDLLR.M<br>K.AMAVEIAAEVAALPAEHDALQLLPK.D<br>K.EFALEPVATAAR.E<br>R.YADTQGWK.V<br>R.LPEILEGAMDELIDALIAEDQAQR.L<br>R.IHTSAATVAVLPEAEEDVAINDSDLK.I<br>K.EVVASVSGQVFAK.L<br>R.SGETTDVSK.E<br>R.QFHQLDAEVLGSDPLADAEVLVFDQLLK.E<br>R.YDGLIEALGGPPTAAGVWAAIGIER.L<br>R.LGAQGTVLGGGR.Y<br>K.ELGIAEIVTLNLTLDGAESR.D<br>K.RVEVPIEPTAVFAR.S<br>R.NDQTLNLR.S<br>R.HTAFEPVTR.L<br>R.GGESVTLRPEFTAGIAR.A<br>R.GELSEDSLAR.L<br>R.AYITNGWQYAPLK.V<br>R.VEVPIEPTAVFAR.S<br>R.SAPGTPEHQALLDILESLLK.<br>R.LGAQGTVLGGGRYDGLIEALGGPPTAAGVWAAIGIER.L<br>R.DRPIADSAVDIAFLTGEAQDFGAVTAGLDAAGVAWER.N<br>R.GTQDMLGDFADR.F<br>R.AGFSTEMVATGSPK.K<br>R.SVEDTLDPIAAR.K<br>R.NIPVQLDYLTPGWTGVAALDGLK.T<br>K.VADTPDGFDR.L<br>R.IVAVDGVAYGK.E<br>K.LTLLYPQWLPKG.H<br>R.YSYAPTNYEVLIDSPMFAGR.H<br>K.NVDTLSHGLTIDKDIAGNILLWDGPAPR.A<br>R.QPFDYAFDIDVPAGTK.S<br>K.WDENDEWER.G<br>K.ETILGEWASHAANYSVQGR.R<br>R.TVEIAYHGGLR.W<br>R.MQASGRPAPTGGIER.A<br>R.GAIAEMAGFTASAGK.P<br>R.EGEGWQVYDFGDVVAALNAVHAYDWER.F<br>K.ETILGEWASHAANYSVQGR.R.W<br>R.KWDLGHNVTNLNVADEPHYLAASPDHIAR.H<br>R.HAALVAEAVAFGSRPDR.Y<br>R.HAALVAEAVAFGSR.P<br>R.VVVTAMMNLQWEQVSLYPAGWFR.N<br>R.VDATDVAR.G<br>R.GLLPHLHSHWNGK.Y<br>K.WDLGHNVTNLNVADEPHYLAASPDHIAR.H<br>R.WRSVEDTLDPIAAR.K<br>K.SIEVAFDLSPTR.S<br>K.GAALNAVQIAELLGR.R<br>R.QIPVGEKDVQK.F<br>R.VPVVGHSEAINIETEKELSAEDAQR.I<br>R.SQDGTIEIGDSGK.T<br>R.RVVSTYQSVSGAGK.A<br>R.IVAGATGNVGR.E<br>R.VVSTYQSVSGAGK.A<br>R.KGAALNAVQIAELLGR.R<br>R.MDPVPLVPEVNPDAIDGYTR.R<br>K.FLDGSGTKEEWK.M<br>R.EVLAIAEREFYDELAASVSPR.S<br>R.EVLAIAER.E<br>K.AGMDELWNQTR.Q<br>R.EFFYDELAASVSPR.S<br>R.VPVVGHSEAINIETEK.E<br>R.EAPGVVLDHKE<br>K.QJAFNVPHDK.F<br>K.GAALNAVQIAELLGR.H<br>R.VREDPTVENGLNLCVSDNLRK.G<br>R.MDPVPLVPEVNPDAIDGYTR.R<br>R.EDGGYTTVPCVGDFAFVSR.V<br>K.ELSAEDAQR.I<br>K.CQNIENFDWAGWMAIFAIGSDATAIHAPK.A<br>K.AGMDELWNQTR.Q<br>K.AAAAGCVIDNSSLYR.M<br>R.NIIANPNCSTAQMVALKPLHDAATR.R<br>K.EDGGYTTVPCVGDFAFVSR.V<br>K.CQNIENFDWAGWMAIFAIGSDATAIHAPK.A<br>R.VFPLYSPNIDSITVVR.K<br>.MNLQITAEIEIAK.A<br>K.DIPTRPGDTLK.V |
| YP_617733 | Sala_2695 | Uncharacterized peroxidase-related                                | 12.87%            | 2                       | R.VPTEVTDAIRADQPADAK.L<br>R.LAPGETASGAHAER.S                                                                                                                                                                                                                                                                                                                                                                                                                                                                                                                                                                                                                                                                                                                                                                                                                                                                                                                                                                                                                                                                                                                                                                                                                                                                                                                                                                                                                                                                                                                                                                                                                                                                                                                                                                                                                                                                                                                                                                                                                                                                                                                                                                                                                                                                                                                                                                                                                                                                                                                                                                                                                                                                                                                                                                                                                                                                                                                                                                                                                                                                                                                                                                                                                                 |
| YP_617736 | Sala_2698 | TonB-dependent receptor                                           | 9.41%             | 5                       | R.FALAEALGLVR.S<br>K.GGGDDYDNPVAPR.L<br>R.RHVISAVGYLPLK.G<br>R.NVQIVDAPALGTVAIVTGNQVYLGSLR.L<br>R.IFGTQQLDNGDASFGENFVGNSDRYGAAR.N<br>R.VIWPITTFIDPEVAR.V<br>R.VGLSEAEAEVK.G<br>R.IVILGGGPIGSELSQAFAR.L<br>R.AIADSATTGVK.V<br>R.AVGLTLVAR.L<br>K.KIGANDESAEAFGSR.V<br>R.TGVSISAQPDVTR.A<br>R.LISSYGPALDR.R<br>R.IGAVPVVDGDAVGVIFSER.D<br>R.AVADLLAQNR.I<br>R.SGPAQAVLQTAAGYELR.C<br>R.DAALLSPASLLDQSLGR.V<br>K.TLLVAGTSPASGAVSPR.Y<br>R.EQLGDYLYPLAER.T<br>R.AGTRPATLSYLTNGLWAAVYVSLYDEK.A<br>K.QVSLDVSQVPAQK.I<br>K.GGLGALPAGTVR.F<br>R.SNAQGEAVITVINGGQSLVQDIR.Q<br>R.AQPVTLDLIQR.G<br>K.IVEFTVGGFDMTEPASAASVIK.F<br>R.RAGTETAPR.E<br>R.GDPQFIGNENIGHTPMSEGLATGLAFDVK.V<br>K.AVGETVTLK.L<br>R.TAEVGDADDEAAVAPR.R<br>R.VLTYEYLQFADHYFR.V<br>R.SERGDADAGIDTAAALPPAIGR.G<br>R.GVEDFDGHDDTDVDTGGDDGDNNGDER.S<br>R.DQESAEAPR.A<br>R.GGVQDQNR.I<br>R.TAEVGDADDEAAVAPR.P<br>R.LAVGPGALIPRDSSETLAAAVQHFGAAGPR.H<br>R.GLGDASDVALGYAR.A<br>R.ANAIALGLADR.V<br>R.ITHIPTGLVVIQQDQR.S<br>R.MATGDMAADPVAASK.E<br>R.AGTGGDEAALFAGDLLR.M<br>K.AMAVEIAAEVAALPAEHDALQLLPK.D<br>K.EFALEPVATAAR.E<br>R.YADTQGWK.V<br>R.LPEILEGAMDELIDALIAEDQAQR.L<br>R.IHTSAATVAVLPEAEEDVAINDSDLK.I<br>K.EVVASVSGQVFAK.L<br>R.SGETTDVSK.E<br>R.QFHQLDAEVLGSDPLADAEVLVFDQLLK.E<br>R.YDGLIEALGGPPTAAGVWAAIGIER.L<br>R.LGAQGTVLGGGR.Y<br>K.ELGIAEIVTLNLTLDGAESR.D<br>K.RVEVPIEPTAVFAR.S<br>R.NDQTLNLR.S<br>R.HTAFEPVTR.L<br>R.GGESVTLRPEFTAGIAR.A<br>R.GELSEDSLAR.L<br>R.AYITNGWQYAPLK.V<br>R.VEVPIEPTAVFAR.S<br>R.SAPGTPEHQALLDILESLLK.<br>R.LGAQGTVLGGGRYDGLIEALGGPPTAAGVWAAIGIER.L<br>R.DRPIADSAVDIAFLTGEAQDFGAVTAGLDAAGVAWER.N<br>R.GTQDMLGDFADR.F<br>R.AGFSTEMVATGSPK.K<br>R.SVEDTLDPIAAR.K<br>R.NIPVQLDYLTPGWTGVAALDGLK.T<br>K.VADTPDGFDR.L<br>R.IVAVDGVAYGK.E<br>K.LTLLYPQWLPKG.H<br>R.YSYAPTNYEVLIDSPMFAGR.H<br>K.NVDTLSHGLTIDKDIAGNILLWDGPAPR.A<br>R.QPFDYAFDIDVPAGTK.S<br>K.WDENDEWER.G<br>K.ETILGEWASHAANYSVQGR.R<br>R.TVEIAYHGGLR.W<br>R.MQASGRPAPTGGIER.A<br>R.GAIAEMAGFTASAGK.P<br>R.EGEGWQVYDFGDVVAALNAVHAYDWER.F<br>K.ETILGEWASHAANYSVQGR.R.W<br>R.KWDLGHNVTNLNVADEPHYLAASPDHIAR.H<br>R.HAALVAEAVAFGSRPDR.Y<br>R.HAALVAEAVAFGSR.P<br>R.VVVTAMMNLQWEQVSLYPAGWFR.N<br>R.VDATDVAR.G<br>R.GLLPHLHSHWNGK.Y<br>K.WDLGHNVTNLNVADEPHYLAASPDHIAR.H<br>R.WRSVEDTLDPIAAR.K<br>K.SIEVAFDLSPTR.S<br>K.GAALNAVQIAELLGR.R<br>R.QIPVGEKDVQK.F<br>R.VPVVGHSEAINIETEKELSAEDAQR.I<br>R.SQDGTIEIGDSGK.T<br>R.RVVSTYQSVSGAGK.A<br>R.IVAGATGNVGR.E<br>R.VVSTYQSVSGAGK.A<br>R.KGAALNAVQIAELLGR.R<br>R.MDPVPLVPEVNPDAIDGYTR.R<br>K.FLDGSGTKEEWK.M<br>R.EVLAIAEREFYDELAASVSPR.S<br>R.EVLAIAER.E<br>K.AGMDELWNQTR.Q<br>R.EFFYDELAASVSPR.S<br>R.VPVVGHSEAINIETEK.E<br>R.EAPGVVLDHKE<br>K.QJAFNVPHDK.F<br>K.GAALNAVQIAELLGR.H<br>R.VREDPTVENGLNLCVSDNLRK.G<br>R.MDPVPLVPEVNPDAIDGYTR.R<br>R.EDGGYTTVPCVGDFAFVSR.V<br>K.ELSAEDAQR.I<br>K.CQNIENFDWAGWMAIFAIGSDATAIHAPK.A<br>K.AGMDELWNQTR.Q<br>K.AAAAGCVIDNSSLYR.M<br>R.NIIANPNCSTAQMVALKPLHDAATR.R<br>K.EDGGYTTVPCVGDFAFVSR.V<br>K.CQNIENFDWAGWMAIFAIGSDATAIHAPK.A<br>R.VFPLYSPNIDSITVVR.K<br>.MNLQITAEIEIAK.A<br>K.DIPTRPGDTLK.V                                                                                                                                                                                                                                              |
| YP_617739 | Sala_2701 | pyridine nucleotide-disulphide oxidoreductase dimerisation region | 7.81%             | 4                       | R.VIWPITTFIDPEVAR.V<br>R.VGLSEAEAEVK.G<br>R.IVILGGGPIGSELSQAFAR.L<br>R.AIADSATTGVK.V<br>R.AVGLTLVAR.L<br>K.KIGANDESAEAFGSR.V<br>R.TGVSISAQPDVTR.A<br>R.LISSYGPALDR.R<br>R.IGAVPVVDGDAVGVIFSER.D<br>R.AVADLLAQNR.I<br>R.SGPAQAVLQTAAGYELR.C<br>R.DAALLSPASLLDQSLGR.V<br>K.TLLVAGTSPASGAVSPR.Y<br>R.EQLGDYLYPLAER.T<br>R.AGTRPATLSYLTNGLWAAVYVSLYDEK.A<br>K.QVSLDVSQVPAQK.I<br>K.GGLGALPAGTVR.F<br>R.SNAQGEAVITVINGGQSLVQDIR.Q<br>R.AQPVTLDLIQR.G<br>K.IVEFTVGGFDMTEPASAASVIK.F<br>R.RAGTETAPR.E<br>R.GDPQFIGNENIGHTPMSEGLATGLAFDVK.V<br>K.AVGETVTLK.L<br>R.TAEVGDADDEAAVAPR.R<br>R.VLTYEYLQFADHYFR.V<br>R.SERGDADAGIDTAAALPPAIGR.G<br>R.GVEDFDGHDDTDVDTGGDDGDNNGDER.S<br>R.DQESAEAPR.A<br>R.GGVQDQNR.I<br>R.TAEVGDADDEAAVAPR.P<br>R.LAVGPGALIPRDSSETLAAAVQHFGAAGPR.H<br>R.GLGDASDVALGYAR.A<br>R.ANAIALGLADR.V<br>R.ITHIPTGLVVIQQDQR.S<br>R.MATGDMAADPVAASK.E<br>R.AGTGGDEAALFAGDLLR.M<br>K.AMAVEIAAEVAALPAEHDALQLLPK.D<br>K.EFALEPVATAAR.E<br>R.YADTQGWK.V<br>R.LPEILEGAMDELIDALIAEDQAQR.L<br>R.IHTSAATVAVLPEAEEDVAINDSDLK.I<br>K.EVVASVSGQVFAK.L<br>R.SGETTDVSK.E<br>R.QFHQLDAEVLGSDPLADAEVLVFDQLLK.E<br>R.YDGLIEALGGPPTAAGVWAAIGIER.L<br>R.LGAQGTVLGGGR.Y<br>K.ELGIAEIVTLNLTLDGAESR.D<br>K.RVEVPIEPTAVFAR.S<br>R.NDQTLNLR.S<br>R.HTAFEPVTR.L<br>R.GGESVTLRPEFTAGIAR.A<br>R.GELSEDSLAR.L<br>R.AYITNGWQYAPLK.V<br>R.VEVPIEPTAVFAR.S<br>R.SAPGTPEHQALLDILESLLK.<br>R.LGAQGTVLGGGRYDGLIEALGGPPTAAGVWAAIGIER.L<br>R.DRPIADSAVDIAFLTGEAQDFGAVTAGLDAAGVAWER.N<br>R.GTQDMLGDFADR.F<br>R.AGFSTEMVATGSPK.K<br>R.SVEDTLDPIAAR.K<br>R.NIPVQLDYLTPGWTGVAALDGLK.T<br>K.VADTPDGFDR.L<br>R.IVAVDGVAYGK.E<br>K.LTLLYPQWLPKG.H<br>R.YSYAPTNYEVLIDSPMFAGR.H<br>K.NVDTLSHGLTIDKDIAGNILLWDGPAPR.A<br>R.QPFDYAFDIDVPAGTK.S<br>K.WDENDEWER.G<br>K.ETILGEWASHAANYSVQGR.R<br>R.TVEIAYHGGLR.W<br>R.MQASGRPAPTGGIER.A<br>R.GAIAEMAGFTASAGK.P<br>R.EGEGWQVYDFGDVVAALNAVHAYDWER.F<br>K.ETILGEWASHAANYSVQGR.R.W<br>R.KWDLGHNVTNLNVADEPHYLAASPDHIAR.H<br>R.HAALVAEAVAFGSRPDR.Y<br>R.HAALVAEAVAFGSR.P<br>R.VVVTAMMNLQWEQVSLYPAGWFR.N<br>R.VDATDVAR.G<br>R.GLLPHLHSHWNGK.Y<br>K.WDLGHNVTNLNVADEPHYLAASPDHIAR.H<br>R.WRSVEDTLDPIAAR.K<br>K.SIEVAFDLSPTR.S<br>K.GAALNAVQIAELLGR.R<br>R.QIPVGEKDVQK.F<br>R.VPVVGHSEAINIETEKELSAEDAQR.I<br>R.SQDGTIEIGDSGK.T<br>R.RVVSTYQSVSGAGK.A<br>R.IVAGATGNVGR.E<br>R.VVSTYQSVSGAGK.A<br>R.KGAALNAVQIAELLGR.R<br>R.MDPVPLVPEVNPDAIDGYTR.R<br>K.FLDGSGTKEEWK.M<br>R.EVLAIAEREFYDELAASVSPR.S<br>R.EVLAIAER.E<br>K.AGMDELWNQTR.Q<br>R.EFFYDELAASVSPR.S<br>R.VPVVGHSEAINIETEK.E<br>R.EAPGVVLDHKE<br>K.QJAFNVPHDK.F<br>K.GAALNAVQIAELLGR.H<br>R.VREDPTVENGLNLCVSDNLRK.G<br>R.MDPVPLVPEVNPDAIDGYTR.R<br>R.EDGGYTTVPCVGDFAFVSR.V<br>K.ELSAEDAQR.I<br>K.CQNIENFDWAGWMAIFAIGSDATAIHAPK.A<br>K.AGMDELWNQTR.Q<br>K.AAAAGCVIDNSSLYR.M<br>R.NIIANPNCSTAQMVALKPLHDAATR.R<br>K.EDGGYTTVPCVGDFAFVSR.V<br>K.CQNIENFDWAGWMAIFAIGSDATAIHAPK.A<br>R.VFPLYSPNIDSITVVR.K<br>.MNLQITAEIEIAK.A<br>K.DIPTRPGDTLK.V                                                                                                                                                                                                                                                                                                                                                                                   |
| YP_617744 | Sala_2706 | polysaccharide biosynthesis protein                               | 4.71%             | 2                       | R.AVGLTLVAR.L<br>K.KIGANDESAEAFGSR.V<br>R.TGVSISAQPDVTR.A<br>R.LISSYGPALDR.R<br>R.IGAVPVVDGDAVGVIFSER.D<br>R.AVADLLAQNR.I<br>R.SGPAQAVLQTAAGYELR.C<br>R.DAALLSPASLLDQSLGR.V<br>K.TLLVAGTSPASGAVSPR.Y<br>R.EQLGDYLYPLAER.T<br>R.AGTRPATLSYLTNGLWAAVYVSLYDEK.A<br>K.QVSLDVSQVPAQK.I<br>K.GGLGALPAGTVR.F<br>R.SNAQGEAVITVINGGQSLVQDIR.Q<br>R.AQPVTLDLIQR.G<br>K.IVEFTVGGFDMTEPASAASVIK.F<br>R.RAGTETAPR.E<br>R.GDPQFIGNENIGHTPMSEGLATGLAFDVK.V<br>K.AVGETVTLK.L<br>R.TAEVGDADDEAAVAPR.R<br>R.VLTYEYLQFADHYFR.V<br>R.SERGDADAGIDTAAALPPAIGR.G<br>R.GVEDFDGHDDTDVDTGGDDGDNNGDER.S<br>R.DQESAEAPR.A<br>R.GGVQDQNR.I<br>R.TAEVGDADDEAAVAPR.P<br>R.LAVGPGALIPRDSSETLAAAVQHFGAAGPR.H<br>R.GLGDASDVALGYAR.A<br>R.ANAIALGLADR.V<br>R.ITHIPTGLVVIQQDQR.S<br>R.MATGDMAADPVAASK.E<br>R.AGTGGDEAALFAGDLLR.M<br>K.AMAVEIAAEVAALPAEHDALQLLPK.D<br>K.EFALEPVATAAR.E<br>R.YADTQGWK.V<br>R.LPEILEGAMDELIDALIAEDQAQR.L<br>R.IHTSAATVAVLPEAEEDVAINDSDLK.I<br>K.EVVASVSGQVFAK.L<br>R.SGETTDVSK.E<br>R.QFHQLDAEVLGSDPLADAEVLVFDQLLK.E<br>R.YDGLIEALGGPPTAAGVWAAIGIER.L<br>R.LGAQGTVLGGGR.Y<br>K.ELGIAEIVTLNLTLDGAESR.D<br>K.RVEVPIEPTAVFAR.S<br>R.NDQTLNLR.S<br>R.HTAFEPVTR.L<br>R.GGESVTLRPEFTAGIAR.A<br>R.GELSEDSLAR.L<br>R.AYITNGWQYAPLK.V<br>R.VEVPIEPTAVFAR.S<br>R.SAPGTPEHQALLDILESLLK.<br>R.LGAQGTVLGGGRYDGLIEALGGPPTAAGVWAAIGIER.L<br>R.DRPIADSAVDIAFLTGEAQDFGAVTAGLDAAGVAWER.N<br>R.GTQDMLGDFADR.F<br>R.AGFSTEMVATGSPK.K<br>R.SVEDTLDPIAAR.K<br>R.NIPVQLDYLTPGWTGVAALDGLK.T<br>K.VADTPDGFDR.L<br>R.IVAVDGVAYGK.E<br>K.LTLLYPQWLPKG.H<br>R.YSYAPTNYEVLIDSPMFAGR.H<br>K.NVDTLSHGLTIDKDIAGNILLWDGPAPR.A<br>R.QPFDYAFDIDVPAGTK.S<br>K.WDENDEWER.G<br>K.ETILGEWASHAANYSVQGR.R<br>R.TVEIAYHGGLR.W<br>R.MQASGRPAPTGGIER.A<br>R.GAIAEMAGFTASAGK.P<br>R.EGEGWQVYDFGDVVAALNAVHAYDWER.F<br>K.ETILGEWASHAANYSVQGR.R.W<br>R.KWDLGHNVTNLNVADEPHYLAASPDHIAR.H<br>R.HAALVAEAVAFGSRPDR.Y<br>R.HAALVAEAVAFGSR.P<br>R.VVVTAMMNLQWEQVSLYPAGWFR.N<br>R.VDATDVAR.G<br>R.GLLPHLHSHWNGK.Y<br>K.WDLGHNVTNLNVADEPHYLAASPDHIAR.H<br>R.WRSVEDTLDPIAAR.K<br>K.SIEVAFDLSPTR.S<br>K.GAALNAVQIAELLGR.R<br>R.QIPVGEKDVQK.F<br>R.VPVVGHSEAINIETEKELSAEDAQR.I<br>R.SQDGTIEIGDSGK.T<br>R.RVVSTYQSVSGAGK.A<br>R.IVAGATGNVGR.E<br>R.VVSTYQSVSGAGK.A<br>R.KGAALNAVQIAELLGR.R<br>R.MDPVPLVPEVNPDAIDGYTR.R<br>K.FLDGSGTKEEWK.M<br>R.EVLAIAEREFYDELAASVSPR.S<br>R.EVLAIAER.E<br>K.AGMDELWNQTR.Q<br>R.EFFYDELAASVSPR.S<br>R.VPVVGHSEAINIETEK.E<br>R.EAPGVVLDHKE<br>K.QJAFNVPHDK.F<br>K.GAALNAVQIAELLGR.H<br>R.VREDPTVENGLNLCVSDNLRK.G<br>R.MDPVPLVPEVNPDAIDGYTR.R<br>R.EDGGYTTVPCVGDFAFVSR.V<br>K.ELSAEDAQR.I<br>K.CQNIENFDWAGWMAIFAIGSDATAIHAPK.A<br>K.AGMDELWNQTR.Q<br>K.AAAAGCVIDNSSLYR.M<br>R.NIIANPNCSTAQMVALKPLHDAATR.R<br>K.EDGGYTTVPCVGDFAFVSR.V<br>K.CQNIENFDWAGWMAIFAIGSDATAIHAPK.A<br>R.VFPLYSPNIDSITVVR.K<br>.MNLQITAEIEIAK.A<br>K.DIPTRPGDTLK.V                                                                                                                                                                                                                                                                                                                                                                                                                                                                           |
| YP_617745 | Sala_2707 | putative signal-transduction protein with CBS domains             | 39.01%            | 4                       | R.LISSYGPALDR.R<br>R.IGAVPVVDGDAVGVIFSER.D<br>R.AVADLLAQNR.I<br>R.SGPAQAVLQTAAGYELR.C<br>R.DAALLSPASLLDQSLGR.V<br>K.TLLVAGTSPASGAVSPR.Y<br>R.EQLGDYLYPLAER.T<br>R.AGTRPATLSYLTNGLWAAVYVSLYDEK.A<br>K.QVSLDVSQVPAQK.I<br>K.GGLGALPAGTVR.F<br>R.SNAQGEAVITVINGGQSLVQDIR.Q<br>R.AQPVTLDLIQR.G<br>K.IVEFTVGGFDMTEPASAASVIK.F<br>R.RAGTETAPR.E<br>R.GDPQFIGNENIGHTPMSEGLATGLAFDVK.V<br>K.AVGETVTLK.L<br>R.TAEVGDADDEAAVAPR.R<br>R.VLTYEYLQFADHYFR.V<br>R.SERGDADAGIDTAAALPPAIGR.G<br>R.GVEDFDGHDDTDVDTGGDDGDNNGDER.S<br>R.DQESAEAPR.A<br>R.GGVQDQNR.I<br>R.TAEVGDADDEAAVAPR.P<br>R.LAVGPGALIPRDSSETLAAAVQHFGAAGPR.H<br>R.GLGDASDVALGYAR.A<br>R.ANAIALGLADR.V<br>R.ITHIPTGLVVIQQDQR.S<br>R.MATGDMAADPVAASK.E<br>R.AGTGGDEAALFAGDLLR.M<br>K.AMAVEIAAEVAALPAEHDALQLLPK.D<br>K.EFALEPVATAAR.E<br>R.YADTQGWK.V<br>R.LPEILEGAMDELIDALIAEDQAQR.L<br>R.IHTSAATVAVLPEAEEDVAINDSDLK.I<br>K.EVVASVSGQVFAK.L<br>R.SGETTDVSK.E<br>R.QFHQLDAEVLGSDPLADAEVLVFDQLLK.E<br>R.YDGLIEALGGPPTAAGVWAAIGIER.L<br>R.LGAQGTVLGGGR.Y<br>K.ELGIAEIVTLNLTLDGAESR.D<br>K.RVEVPIEPTAVFAR.S<br>R.NDQTLNLR.S<br>R.HTAFEPVTR.L<br>R.GGESVTLRPEFTAGIAR.A<br>R.GELSEDSLAR.L<br>R.AYITNGWQYAPLK.V<br>R.VEVPIEPTAVFAR.S<br>R.SAPGTPEHQALLDILESLLK.<br>R.LGAQGTVLGGGRYDGLIEALGGPPTAAGVWAAIGIER.L<br>R.DRPIADSAVDIAFLTGEAQDFGAVTAGLDAAGVAWER.N<br>R.GTQDMLGDFADR.F<br>R.AGFSTEMVATGSPK.K<br>R.SVEDTLDPIAAR.K<br>R.NIPVQLDYLTPGWTGVAALDGLK.T<br>K.VADTPDGFDR.L<br>R.IVAVDGVAYGK.E<br>K.LTLLYPQWLPKG.H<br>R.YSYAPTNYEVLIDSPMFAGR.H<br>K.NVDTLSHGLTIDKDIAGNILLWDGPAPR.A<br>R.QPFDYAFDIDVPAGTK.S<br>K.WDENDEWER.G<br>K.ETILGEWASHAANYSVQGR.R<br>R.TVEIAYHGGLR.W<br>R.MQASGRPAPTGGIER.A<br>R.GAIAEMAGFTASAGK.P<br>R.EGEGWQVYDFGDVVAALNAVHAYDWER.F<br>K.ETILGEWASHAANYSVQGR.R.W<br>R.KWDLGHNVTNLNVADEPHYLAASPDHIAR.H<br>R.HAALVAEAVAFGSRPDR.Y<br>R.HAALVAEAVAFGSR.P<br>R.VVVTAMMNLQWEQVSLYPAGWFR.N<br>R.VDATDVAR.G<br>R.GLLPHLHSHWNGK.Y<br>K.WDLGHNVTNLNVADEPHYLAASPDHIAR.H<br>R.WRSVEDTLDPIAAR.K<br>K.SIEVAFDLSPTR.S<br>K.GAALNAVQIAELLGR.R<br>R.QIPVGEKDVQK.F<br>R.VPVVGHSEAINIETEKELSAEDAQR.I<br>R.SQDGTIEIGDSGK.T<br>R.RVVSTYQSVSGAGK.A<br>R.IVAGATGNVGR.E<br>R.VVSTYQSVSGAGK.A<br>R.KGAALNAVQIAELLGR.R<br>R.MDPVPLVPEVNPDAIDGYTR.R<br>K.FLDGSGTKEEWK.M<br>R.EVLAIAEREFYDELAASVSPR.S<br>R.EVLAIAER.E<br>K.AGMDELWNQTR.Q<br>R.EFFYDELAASVSPR.S<br>R.VPVVGHSEAINIETEK.E<br>R.EAPGVVLDHKE<br>K.QJAFNVPHDK.F<br>K.GAALNAVQIAELLGR.H<br>R.VREDPTVENGLNLCVSDNLRK.G<br>R.MDPVPLVPEVNPDAIDGYTR.R<br>R.EDGGYTTVPCVGDFAFVSR.V<br>K.ELSAEDAQR.I<br>K.CQNIENFDWAGWMAIFAIGSDATAIHAPK.A<br>K.AGMDELWNQTR.Q<br>K.AAAAGCVIDNSSLYR.M<br>R.NIIANPNCSTAQMVALKPLHDAATR.R<br>K.EDGGYTTVPCVGDFAFVSR.V<br>K.CQNIENFDWAGWMAIFAIGSDATAIHAPK.A<br>R.VFPLYSPNIDSITVVR.K<br>.MNLQITAEIEIAK.A<br>K.DIPTRPGDTLK.V                                                                                                                                                                                                                                                                                                                                                                                                                                                                                                                                        |
| YP_617748 | Sala_2711 | hypothetical protein                                              | 40.93%            | 11                      | R.EQLGDYLYPLAER.T<br>R.AGTRPATLSYLTNGLWAAVYVSLYDEK.A<br>K.QVSLDVSQVPAQK.I<br>K.GGLGALPAGTVR.F<br>R.SNAQGEAVITVINGGQSLVQDIR.Q<br>R.AQPVTLDLIQR.G<br>K.IVEFTVGGFDMTEPASAASVIK.F<br>R.RAGTETAPR.E<br>R.GDPQFIGNENIGHTPMSEGLATGLAFDVK.V<br>K.AVGETVTLK.L<br>R.TAEVGDADDEAAVAPR.R<br>R.VLTYEYLQFADHYFR.V<br>R.SERGDADAGIDTAAALPPAIGR.G<br>R.GVEDFDGHDDTDVDTGGDDGDNNGDER.S<br>R.DQESAEAPR.A<br>R.GGVQDQNR.I<br>R.TAEVGDADDEAAVAPR.P<br>R.LAVGPGALIPRDSSETLAAAVQHFGAAGPR.H<br>R.GLGDASDVALGYAR.A<br>R.ANAIALGLADR.V<br>R.ITHIPTGLVVIQQDQR.S<br>R.MATGDMAADPVAASK.E<br>R.AGTGGDEAALFAGDLLR.M<br>K.AMAVEIAAEVAALPAEHDALQLLPK.D<br>K.EFALEPVATAAR.E<br>R.YADTQGWK.V<br>R.LPEILEGAMDELIDALIAEDQAQR.L<br>R.IHTSAATVAVLPEAEEDVAINDSDLK.I<br>K.EVVASVSGQVFAK.L<br>R.SGETTDVSK.E<br>R.QFHQLDAEVLGSDPLADAEVLVFDQLLK.E<br>R.YDGLIEALGGPPTAAGVWAAIGIER.L<br>R.LGAQGTVLGGGR.Y<br>K.ELGIAEIVTLNLTLDGAESR.D<br>K.RVEVPIEPTAVFAR.S<br>R.NDQTLNLR.S<br>R.HTAFEPVTR.L<br>R.GGESVTLRPEFTAGIAR.A<br>R.GELSEDSLAR.L<br>R.AYITNGWQYAPLK.V<br>R.VEVPIEPTAVFAR.S<br>R.SAPGTPEHQALLDILESLLK.<br>R.LGAQGTVLGGGRYDGLIEALGGPPTAAGVWAAIGIER.L<br>R.DRPIADSAVDIAFLTGEAQDFGAVTAGLDAAGVAWER.N<br>R.GTQDMLGDFADR.F<br>R.AGFSTEMVATGSPK.K<br>R.SVEDTLDPIAAR.K<br>R.NIPVQLDYLTPGWTGVAALDGLK.T<br>K.VADTPDGFDR.L<br>R.IVAVDGVAYGK.E<br>K.LTLLYPQWLPKG.H<br>R.YSYAPTNYEVLIDSPMFAGR.H<br>K.NVDTLSHGLTIDKDIAGNILLWDGPAPR.A<br>R.QPFDYAFDIDVPAGTK.S<br>K.WDENDEWER.G<br>K.ETILGEWASHAANYSVQGR.R<br>R.TVEIAYHGGLR.W<br>R.MQASGRPAPTGGIER.A<br>R.GAIAEMAGFTASAGK.P<br>R.EGEGWQVYDFGDVVAALNAVHAYDWER.F<br>K.ETILGEWASHAANYSVQGR.R.W<br>R.KWDLGHNVTNLNVADEPHYLAASPDHIAR.H<br>R.HAALVAEAVAFGSRPDR.Y<br>R.HAALVAEAVAFGSR.P<br>R.VVVTAMMNLQWEQVSLYPAGWFR.N<br>R.VDATDVAR.G<br>R.GLLPHLHSHWNGK.Y<br>K.WDLGHNVTNLNVADEPHYLAASPDHIAR.H<br>R.WRSVEDTLDPIAAR.K<br>K.SIEVAFDLSPTR.S<br>K.GAALNAVQIAELLGR.R<br>R.QIPVGEKDVQK.F<br>R.VPVVGHSEAINIETEKELSAEDAQR.I<br>R.SQDGTIEIGDSGK.T<br>R.RVVSTYQSVSGAGK.A<br>R.IVAGATGNVGR.E<br>R.VVSTYQSVSGAGK.A<br>R.KGAALNAVQIAELLGR.R<br>R.MDPVPLVPEVNPDAIDGYTR.R<br>K.FLDGSGTKEEWK.M<br>R.EVLAIAEREFYDELAASVSPR.S<br>R.EVLAIAER.E<br>K.AGMDELWNQTR.Q<br>R.EFFYDELAASVSPR.S<br>R.VPVVGHSEAINIETEK.E<br>R.EAPGVVLDHKE<br>K.QJAFNVPHDK.F<br>K.GAALNAVQIAELLGR.H<br>R.VREDPTVENGLNLCVSDNLRK.G<br>R.MDPVPLVPEVNPDAIDGYTR.R<br>R.EDGGYTTVPCVGDFAFVSR.V<br>K.ELSAEDAQR.I<br>K.CQNIENFDWAGWMAIFAIGSDATAIHAPK.A<br>K.AGMDELWNQTR.Q<br>K.AAAAGCVIDNSSLYR.M<br>R.NIIANPNCSTAQMVALKPLHDAATR.R<br>K.EDGGYTTVPCVGDFAFVSR.V<br>K.CQNIENFDWAGWMAIFAIGSDATAIHAPK.A<br>R.VFPLYSPNIDSITVVR.K<br>.MNLQITAEIEIAK.A<br>K.DIPTRPGDTLK.V                                                                                                                                                                                                                                                                                                                                                                                                                                                                                                                                                                                                                                                                                   |
| YP_617750 | Sala_2712 | hypothetical protein                                              | 35.90%            | 7                       | R.TAEVGDADDEAAVAPR.R<br>R.VLTYEYLQFADHYFR.V<br>R.SERGDADAGIDTAAALPPAIGR.G<br>R.GVEDFDGHDDTDVDTGGDDGDNNGDER.S<br>R.DQESAEAPR.A<br>R.GGVQDQNR.I<br>R.TAEVGDADDEAAVAPR.P<br>R.LAVGPGALIPRDSSETLAAAVQHFGAAGPR.H<br>R.GLGDASDVALGYAR.A<br>R.ANAIALGLADR.V<br>R.ITHIPTGLVVIQQDQR.S<br>R.MATGDMAADPVAASK.E<br>R.AGTGGDEAALFAGDLLR.M<br>K.AMAVEIAAEVAALPAEHDALQLLPK.D<br>K.EFALEPVATAAR.E<br>R.YADTQGWK.V<br>R.LPEILEGAMDELIDALIAEDQAQR.L<br>R.IHTSAATVAVLPEAEEDVAINDSDLK.I<br>K.EVVASVSGQVFAK.L<br>R.SGETTDVSK.E<br>R.QFHQLDAEVLGSDPLADAEVLVFDQLLK.E<br>R.YDGLIEALGGPPTAAGVWAAIGIER.L<br>R.LGAQGTVLGGGR.Y<br>K.ELGIAEIVTLNLTLDGAESR.D<br>K.RVEVPIEPTAVFAR.S<br>R.NDQTLNLR.S<br>R.HTAFEPVTR.L<br>R.GGESVTLRPEFTAGIAR.A<br>R.GELSEDSLAR.L<br>R.AYITNGWQYAPLK.V<br>R.VEVPIEPTAVFAR.S<br>R.SAPGTPEHQALLDILESLLK.<br>R.LGAQGTVLGGGRYDGLIEALGGPPTAAGVWAAIGIER.L<br>R.DRPIADSAVDIAFLTGEAQDFGAVTAGLDAAGVAWER.N<br>R.GTQDMLGDFADR.F<br>R.AGFSTEMVATGSPK.K<br>R.SVEDTLDPIAAR.K<br>R.NIPVQLDYLTPGWTGVAALDGLK.T<br>K.VADTPDGFDR.L<br>R.IVAVDGVAYGK.E<br>K.LTLLYPQWLPKG.H<br>R.YSYAPTNYEVLIDSPMFAGR.H<br>K.NVDTLSHGLTIDKDIAGNILLWDGPAPR.A<br>R.QPFDYAFDIDVPAGTK.S<br>K.WDENDEWER.G<br>K.ETILGEWASHAANYSVQGR.R<br>R.TVEIAYHGGLR.W<br>R.MQASGRPAPTGGIER.A<br>R.GAIAEMAGFTASAGK.P<br>R.EGEGWQVYDFGDVVAALNAVHAYDWER.F<br>K.ETILGEWASHAANYSVQGR.R.W<br>R.KWDLGHNVTNLNVADEPHYLAASPDHIAR.H<br>R.HAALVAEAVAFGSRPDR.Y<br>R.HAALVAEAVAFGSR.P<br>R.VVVTAMMNLQWEQVSLYPAGWFR.N<br>R.VDATDVAR.G<br>R.GLLPHLHSHWNGK.Y<br>K.WDLGHNVTNLNVADEPHYLAASPDHIAR.H<br>R.WRSVEDTLDPIAAR.K<br>K.SIEVAFDLSPTR.S<br>K.GAALNAVQIAELLGR.R<br>R.QIPVGEKDVQK.F<br>R.VPVVGHSEAINIETEKELSAEDAQR.I<br>R.SQDGTIEIGDSGK.T<br>R.RVVSTYQSVSGAGK.A<br>R.IVAGATGNVGR.E<br>R.VVSTYQSVSGAGK.A<br>R.KGAALNAVQIAELLGR.R<br>R.MDPVPLVPEVNPDAIDGYTR.R<br>K.FLDGSGTKEEWK.M<br>R.EVLAIAEREFYDELAASVSPR.S<br>R.EVLAIAER.E<br>K.AGMDELWNQTR.Q<br>R.EFFYDELAASVSPR.S<br>R.VPVVGHSEAINIETEK.E<br>R.EAPGVVLDHKE<br>K.QJAFNVPHDK.F<br>K.GAALNAVQIAELLGR.H<br>R.VREDPTVENGLNLCVSDNLRK.G<br>R.MDPVPLVPEVNPDAIDGYTR.R<br>R.EDGGYTTVPCVGDFAFVSR.V<br>K.ELSAEDAQR.I<br>K.CQNIENFDWAGWMAIFAIGSDATAIHAPK.A<br>K.AGMDELWNQTR.Q<br>K.AAAAGCVIDNSSLYR.M<br>R.NIIANPNCSTAQMVALKPLHDAATR.R<br>K.EDGGYTTVPCVGDFAFVSR.V<br>K.CQNIENFDWAGWMAIFAIGSDATAIHAPK.A<br>R.VFPLYSPNIDSITVVR.K<br>.MNLQITAEIEIAK.A<br>K.DIPTRPGDTLK.V                                                                                                                                                                                                                                                                                                                                                                                                                                                                                                                                                                                                                                                                                                                                                                                                                                                                                                                                           |
| YP_617751 | Sala_2713 | modification methylase, HemK family                               | 20.80%            | 3                       | R.LAVGPGALIPRDSSETLAAAVQHFGAAGPR.H<br>R.GLGDASDVALGYAR.A<br>R.ANAIALGLADR.V<br>R.ITHIPTGLVVIQQDQR.S<br>R.MATGDMAADPVAASK.E<br>R.AGTGGDEAALFAGDLLR.M<br>K.AMAVEIAAEVAALPAEHDALQLLPK.D<br>K.EFALEPVATAAR.E<br>R.YADTQGWK.V<br>R.LPEILEGAMDELIDALIAEDQAQR.L<br>R.IHTSAATVAVLPEAEEDVAINDSDLK.I<br>K.EVVASVSGQVFAK.L<br>R.SGETTDVSK.E<br>R.QFHQLDAEVLGSDPLADAEVLVFDQLLK.E<br>R.YDGLIEALGGPPTAAGVWAAIGIER.L<br>R.LGAQGTVLGGGR.Y<br>K.ELGIAEIVTLNLTLDGAESR.D<br>K.RVEVPIEPTAVFAR.S<br>R.NDQTLNLR.S<br>R.HTAFEPVTR.L<br>R.GGESVTLRPEFTAGIAR.A<br>R.GELSEDSLAR.L<br>R.AYITNGWQYAPLK.V<br>R.VEVPIEPTAVFAR.S<br>R.SAPGTPEHQALLDILESLLK.<br>R.LGAQGTVLGGGRYDGLIEALGGPPTAAGVWAAIGIER.L<br>R.DRPIADSAVDIAFLTGEAQDFGAVTAGLDAAGVAWER.N<br>R.GTQDMLGDFADR.F<br>R.AGFSTEMVATGSPK.K<br>R.SVEDTLDPIAAR.K<br>R.NIPVQLDYLTPGWTGVAALDGLK.T<br>K.VADTPDGFDR.L<br>R.IVAVDGVAYGK.E<br>K.LTLLYPQWLPKG.H<br>R.YSYAPTNYEVLIDSPMFAGR.H<br>K.NVDTLSHGLTIDKDIAGNILLWDGPAPR.A<br>R.QPFDYAFDIDVPAGTK.S<br>K.WDENDEWER.G<br>K.ETILGEWASHAANYSVQGR.R<br>R.TVEIAYHGGLR.W<br>R.MQASGRPAPTGGIER.A<br>R.GAIAEMAGFTASAGK.P<br>R.EGEGWQVYDFGDVVAALNAVHAYDWER.F<br>K.ETILGEWASHAANYSVQGR.R.W<br>R.KWDLGHNVTNLNVADEPHYLAASPDHIAR.H<br>R.HAALVAEAVAFGSRPDR.Y<br>R.HAALVAEAVAFGSR.P<br>R.VVVTAMMNLQWEQVSLYPAGWFR.N<br>R.VDATDVAR.G<br>R.GLLPHLHSHWNGK.Y<br>K.WDLGHNVTNLNVADEPHYLAASPDHIAR.H<br>R.WRSVEDT                                                                                                                                                                                                                                                                                                                                                                                                                                                                                                                                                                                                                                                                                                                                                                                                                                                                                                                                                                                                                                                                                                                                                                                                                                                                                                                                                                                                                                                                                                                                                                                                                                                                                                                                                                                                                                                                                                                   |





| Accession | Locus tag | Description                                     | Sequence coverage | No. peptides identified | List of peptides identified                                                                                                                                                                                                                                                                                                                                                                                                                                                                                                                                                                                                                                                                                                                                                                                                                                                                                                                                                                                                                                                                                                                                                                                                                                                                                                                                                                                                                                                                                                                                                                                                                                                                                                                                                                                                                                                                                                                                                                                                                                                                                                                                                                                                                                                                                                                                                                                                                                                                                                                                                                                                                                                                                                                                                                                                                                                                                                                                                                                                                                                                                                                                                |
|-----------|-----------|-------------------------------------------------|-------------------|-------------------------|----------------------------------------------------------------------------------------------------------------------------------------------------------------------------------------------------------------------------------------------------------------------------------------------------------------------------------------------------------------------------------------------------------------------------------------------------------------------------------------------------------------------------------------------------------------------------------------------------------------------------------------------------------------------------------------------------------------------------------------------------------------------------------------------------------------------------------------------------------------------------------------------------------------------------------------------------------------------------------------------------------------------------------------------------------------------------------------------------------------------------------------------------------------------------------------------------------------------------------------------------------------------------------------------------------------------------------------------------------------------------------------------------------------------------------------------------------------------------------------------------------------------------------------------------------------------------------------------------------------------------------------------------------------------------------------------------------------------------------------------------------------------------------------------------------------------------------------------------------------------------------------------------------------------------------------------------------------------------------------------------------------------------------------------------------------------------------------------------------------------------------------------------------------------------------------------------------------------------------------------------------------------------------------------------------------------------------------------------------------------------------------------------------------------------------------------------------------------------------------------------------------------------------------------------------------------------------------------------------------------------------------------------------------------------------------------------------------------------------------------------------------------------------------------------------------------------------------------------------------------------------------------------------------------------------------------------------------------------------------------------------------------------------------------------------------------------------------------------------------------------------------------------------------------------|
|           |           |                                                 |                   |                         | K.TLLAQLTAR.F<br>K.SIGFGAHVAGPDER.R<br>R.KAENPSIIR.D<br>K.FGLPEFVGR.L<br>K.LFDLLEVALTFTDDALVAVAKK.A<br>K.LMEGTTASVPPQGR.K<br>K.KLFDLEEVALTFTDDALVAVAK.K<br>R.VLSVAVHNYK.R<br>K.STLYCSFGK.S<br>R.GIVYDELDK.I<br>K.SQHEVR.K                                                                                                                                                                                                                                                                                                                                                                                                                                                                                                                                                                                                                                                                                                                                                                                                                                                                                                                                                                                                                                                                                                                                                                                                                                                                                                                                                                                                                                                                                                                                                                                                                                                                                                                                                                                                                                                                                                                                                                                                                                                                                                                                                                                                                                                                                                                                                                                                                                                                                                                                                                                                                                                                                                                                                                                                                                                                                                                                                  |
| YP_617782 | Sala_2744 | putative outer membrane protein with a TonB box | 79.64%            | 65                      | R.SLGDYFDFSLADFAAGNANR.L<br>R.GPVFDIEQFSVK.V<br>R.YDLFGNDAKPPLNPNFLAR.Y<br>R.VTFDSAAEAAFNLISELGLEK.Y<br>K.VAFPDIAEGDFQGGAINVLR.S<br>R.QVSSFYNAAVR.V<br>R.NTGSLALAPTDNIDPK.L<br>R.STTDSANGNSANGLR.V<br>R.GTVESASGPGVSGASVTIITHVPSGTVAR.S<br>R.YGYDTLGLSPNAVEEDEKIIIG.K.L<br>R.YGPGFGVATTNR.D<br>R.SIYETHQWK.G<br>R.LPVLLEDAIVTASSVGGAEQSNGPITALGR.E<br>R.GGVGIFSGGTPDFVLSNFSNTGLLNLVDINR.S<br>R.FSVDGQVQSDDFGLNNGGLPSTR.G<br>R.FGFNWQATDK.L<br>K.VDLHVSQEIFAVGDAK.F<br>K.LDWNISDQRA<br>R.HSNDLNTENLSDFFTAR.L<br>K.FHGGAFFTYTDDSLTGNR.T<br>R.DYNRDQTPFGGR.D<br>K.TKETDPFDDGFGFANQVPLTQAVIDQVSSVAQR.Y<br>K.NSQTSPDFFK.V<br>K.NYGYTWTDLR.S<br>K.LFADVENLNLIDSDWGLR.Q<br>R.SGRPYSVTMLDNSGGR.G<br>R.RDPLVTMDLTNAR.T<br>R.EAIEGVASINR.D<br>K.DEGALTSSTASSNYGNAFVDPNR.A<br>R.DLQLTNSR.G<br>R.VACAATSGTNCYQYSNVR.A<br>K.ETDPFDDGFGFANQVPLTQAVIDQVSSVAQR.Y<br>R.VGGPFTVEVTAEDYESAQTDLFLQAGQPYR.L<br>R.GRDISLDFDSK.Q<br>R.YGYDTLGLSPNAVEEDEK.I<br>R.TIEVAGNKR.L<br>R.GAVFGTGNLGNMLLYVPTAGGDRP.V<br>R.APNQVLSR.V<br>R.LFFGPDVSR.H<br>R.LDAGDHSR.F<br>K.QYGANISGPIIK.D<br>K.NSQTSPDFFK.VDLHVSQEIFAVGDAK.F<br>R.FMAGYTDVSVNLFQR.S<br>K.QYGANISGPIIK.D<br>K.LFFMFAYEK.T<br>K.KNSQTSPDFFK.V<br>R.ISLFGVYR.S<br>R.SNCAASATCDALINGIDGTPASVNDFLAR.N<br>K.DLFFMFAYEK.T<br>R.SVPIGLPDGR.T<br>K.ASLQADYIEGDGWFVGGQFLYDK.N<br>R.FGFNWQATDKLIVR.G<br>K.REFFGDNETR.I<br>K.AFDGLTLDGYSYTNVWKEGALTSSTASSNYGNAFVDPNR.A<br>R.TIEVAGNKR.L<br>R.SGRPYSVTMLDNSGGR.G<br>R.SGGNKFHGGAFFTYTDDSLTGNR.T<br>R.PYSVTMLDNSGGR.G<br>R.NTGSLALAPTDNIDPK.L<br>R.LNRFVSDGQVQSDDFGLNNGGLPSTR.G<br>R.GAVFGTGNLGNMLLYVPTAGGDRP.V<br>R.DLQLTNSRER.A<br>R.DISLDFDSK.Q<br>R.ASLTYR.N<br>K.GGIDFKR.E<br>R.NKVDAPSGTALLGEAAAEGR.G<br>R.HHLLDDAAR.D<br>R.DVAVLQGTNTSLGVTLLAHLV.E<br>R.GRDGLTGR.G<br>K.VDAPSGTALLGEAAAEGR.G<br>R.MGVAAAAI5EAGQR.S<br>R.GGTVAGDHDVFAGPEEMITLSHR.A<br>R.GISLATCSER.G<br>R.TFLPNLQNVTLSDALGK.S<br>K.TGDDQLSANAR.K<br>K.RTFLPNLQNVTLSDALGK.S<br>K.TGDDQLSANAR.K<br>R.SVEHNGSLDNLWLMK.T<br>K.TVGTIIGGAVGALAGR.A<br>R.GTGTGIIAGLAGLAGHIAGR.G<br>R.YNNGGLVSTANLMDLGLAGR.S<br>R.LLIAEAYESAPFAAGIDR.G<br>R.LVYDAANQR.L<br>R.VVAFATNAAGQSDYYDGLAPK.I<br>R.GTAVAIETTASNLR.S<br>R.TISSADDQLR.A<br>R.SIADVAAEGTAGITAALGPNDPGIVR.V<br>R.IAEASVGAASR.S<br>R.AQGVTDIIIDFR.Y<br>R.GSGDCEDFAILKMQMLR.A<br>K.LDNVKAAPAK.V<br>R.STSALLSSTINR.E<br>R.VAREACGACHMEVIEATER.S<br>R.LEEPGRDLK.Q<br>R.DEMFQLGRHQLT.P<br>K.LFDVTNLQPVAVPVGTVR.L<br>R.YDSFLGVQELFVDK.H<br>R.QTIFPAGGGRALINR.N<br>K.GDDWFFVANAVSDTVFEP.R.T<br>R.SFLNDPAALTGAVAFADR.S<br>K.AVTGAYLSSGNAFSTR.T<br>R.SPDAPIFGTDVSLQK.A<br>R.LQNGIQIPGVSVPYR.G<br>R.ATATTSAPNPGDNDIQVTFPAEGGAIK.A<br>R.AGTGASVAAPLTAEAR.A<br>R.IINEFTGVLTK.G<br>R.HIGADVDPAGDIGVGR.E<br>K.SAVISGSGNVATHAAEK.I<br>R.TEATGYGAVYFLANMLAAK.G<br>K.AANAAGVAVSGLMSQNSAR.R<br>R.VQNNNAISPKK.G<br>K.FLAFQTFK.N<br>R.VQREPDSDAWTALGAAR.F<br>R.APTADEMPVAAR.A<br>K.AVALSPESAGLWSALGEAR.V<br>K.AAQALKDGAANPAAGR.L<br>K.DGIAANPAAGR.L<br>R.FDMGNFVGAAYEK.A<br>R.DGGAPVHNPATGALVGVVEADAADAADAVATAR.A<br>R.LSTEEGVLMCLAEALLRVPDNATANALIR.D<br>R.VPDNATANALIR.D<br>R.NQIGAVGSPQFGR.G<br>R.LLENGANSFVHQFSDPDVSAEELIDPR.S<br>R.GYDLGDRGVPEALVAALGAAR.R<br>R.AQTLGLGDFPVFTAK.L<br>R.LPADAILYLNESR.Y |
| YP_617785 | Sala_2747 | Dihydropicolinate reductase                     | 46.06%            | 8                       | R.HKVDAPSGTALLGEAAAEGR.G<br>R.HHLLDDAAR.D<br>R.DVAVLQGTNTSLGVTLLAHLV.E<br>R.GRDGLTGR.G<br>K.VDAPSGTALLGEAAAEGR.G<br>R.MGVAAAAI5EAGQR.S<br>R.GGTVAGDHDVFAGPEEMITLSHR.A<br>R.GISLATCSER.G<br>R.TFLPNLQNVTLSDALGK.S<br>K.TGDDQLSANAR.K<br>K.RTFLPNLQNVTLSDALGK.S<br>K.TGDDQLSANAR.K<br>R.SVEHNGSLDNLWLMK.T<br>K.TVGTIIGGAVGALAGR.A<br>R.GTGTGIIAGLAGLAGHIAGR.G<br>R.YNNGGLVSTANLMDLGLAGR.S<br>R.LLIAEAYESAPFAAGIDR.G<br>R.LVYDAANQR.L<br>R.VVAFATNAAGQSDYYDGLAPK.I<br>R.GTAVAIETTASNLR.S<br>R.TISSADDQLR.A<br>R.SIADVAAEGTAGITAALGPNDPGIVR.V<br>R.IAEASVGAASR.S<br>R.AQGVTDIIIDFR.Y<br>R.GSGDCEDFAILKMQMLR.A<br>K.LDNVKAAPAK.V<br>R.STSALLSSTINR.E<br>R.VAREACGACHMEVIEATER.S<br>R.LEEPGRDLK.Q<br>R.DEMFQLGRHQLT.P<br>K.LFDVTNLQPVAVPVGTVR.L<br>R.YDSFLGVQELFVDK.H<br>R.QTIFPAGGGRALINR.N<br>K.GDDWFFVANAVSDTVFEP.R.T<br>R.SFLNDPAALTGAVAFADR.S<br>K.AVTGAYLSSGNAFSTR.T<br>R.SPDAPIFGTDVSLQK.A<br>R.LQNGIQIPGVSVPYR.G<br>R.ATATTSAPNPGDNDIQVTFPAEGGAIK.A<br>R.AGTGASVAAPLTAEAR.A<br>R.IINEFTGVLTK.G<br>R.HIGADVDPAGDIGVGR.E<br>K.SAVISGSGNVATHAAEK.I<br>R.TEATGYGAVYFLANMLAAK.G<br>K.AANAAGVAVSGLMSQNSAR.R<br>R.VQNNNAISPKK.G<br>K.FLAFQTFK.N<br>R.VQREPDSDAWTALGAAR.F<br>R.APTADEMPVAAR.A<br>K.AVALSPESAGLWSALGEAR.V<br>K.AAQALKDGAANPAAGR.L<br>K.DGIAANPAAGR.L<br>R.FDMGNFVGAAYEK.A<br>R.DGGAPVHNPATGALVGVVEADAADAADAVATAR.A<br>R.LSTEEGVLMCLAEALLRVPDNATANALIR.D<br>R.VPDNATANALIR.D<br>R.NQIGAVGSPQFGR.G<br>R.LLENGANSFVHQFSDPDVSAEELIDPR.S<br>R.GYDLGDRGVPEALVAALGAAR.R<br>R.AQTLGLGDFPVFTAK.L<br>R.LPADAILYLNESR.Y                                                                                                                                                                                                                                                                                                                                                                                                                                                                                                                                                                                                                                                                                                                                                                                                                                                                                                                                                                                                                                                                                                                                                                                                                                                                                                                                                                                                                                                                                                                                                                                                                                                      |
| YP_617788 | Sala_2750 | ribosomal protein L28                           | 46.39%            | 5                       | R.HKVDAPSGTALLGEAAAEGR.G<br>R.HHLLDDAAR.D<br>R.DVAVLQGTNTSLGVTLLAHLV.E<br>R.GRDGLTGR.G<br>K.VDAPSGTALLGEAAAEGR.G<br>R.MGVAAAAI5EAGQR.S<br>R.GGTVAGDHDVFAGPEEMITLSHR.A<br>R.GISLATCSER.G<br>R.TFLPNLQNVTLSDALGK.S<br>K.TGDDQLSANAR.K<br>K.RTFLPNLQNVTLSDALGK.S<br>K.TGDDQLSANAR.K<br>R.SVEHNGSLDNLWLMK.T<br>K.TVGTIIGGAVGALAGR.A<br>R.GTGTGIIAGLAGLAGHIAGR.G<br>R.YNNGGLVSTANLMDLGLAGR.S<br>R.LLIAEAYESAPFAAGIDR.G<br>R.LVYDAANQR.L<br>R.VVAFATNAAGQSDYYDGLAPK.I<br>R.GTAVAIETTASNLR.S<br>R.TISSADDQLR.A<br>R.SIADVAAEGTAGITAALGPNDPGIVR.V<br>R.IAEASVGAASR.S<br>R.AQGVTDIIIDFR.Y<br>R.GSGDCEDFAILKMQMLR.A<br>K.LDNVKAAPAK.V<br>R.STSALLSSTINR.E<br>R.VAREACGACHMEVIEATER.S<br>R.LEEPGRDLK.Q<br>R.DEMFQLGRHQLT.P<br>K.LFDVTNLQPVAVPVGTVR.L<br>R.YDSFLGVQELFVDK.H<br>R.QTIFPAGGGRALINR.N<br>K.GDDWFFVANAVSDTVFEP.R.T<br>R.SFLNDPAALTGAVAFADR.S<br>K.AVTGAYLSSGNAFSTR.T<br>R.SPDAPIFGTDVSLQK.A<br>R.LQNGIQIPGVSVPYR.G<br>R.ATATTSAPNPGDNDIQVTFPAEGGAIK.A<br>R.AGTGASVAAPLTAEAR.A<br>R.IINEFTGVLTK.G<br>R.HIGADVDPAGDIGVGR.E<br>K.SAVISGSGNVATHAAEK.I<br>R.TEATGYGAVYFLANMLAAK.G<br>K.AANAAGVAVSGLMSQNSAR.R<br>R.VQNNNAISPKK.G<br>K.FLAFQTFK.N<br>R.VQREPDSDAWTALGAAR.F<br>R.APTADEMPVAAR.A<br>K.AVALSPESAGLWSALGEAR.V<br>K.AAQALKDGAANPAAGR.L<br>K.DGIAANPAAGR.L<br>R.FDMGNFVGAAYEK.A<br>R.DGGAPVHNPATGALVGVVEADAADAADAVATAR.A<br>R.LSTEEGVLMCLAEALLRVPDNATANALIR.D<br>R.VPDNATANALIR.D<br>R.NQIGAVGSPQFGR.G<br>R.LLENGANSFVHQFSDPDVSAEELIDPR.S<br>R.GYDLGDRGVPEALVAALGAAR.R<br>R.AQTLGLGDFPVFTAK.L<br>R.LPADAILYLNESR.Y                                                                                                                                                                                                                                                                                                                                                                                                                                                                                                                                                                                                                                                                                                                                                                                                                                                                                                                                                                                                                                                                                                                                                                                                                                                                                                                                                                                                                                                                                                                                                                                                                                                      |
| YP_617790 | Sala_2752 | 17 kDa surface antigen                          | 28.57%            | 2                       | R.HKVDAPSGTALLGEAAAEGR.G<br>R.HHLLDDAAR.D<br>R.DVAVLQGTNTSLGVTLLAHLV.E<br>R.GRDGLTGR.G<br>K.VDAPSGTALLGEAAAEGR.G<br>R.MGVAAAAI5EAGQR.S<br>R.GGTVAGDHDVFAGPEEMITLSHR.A<br>R.GISLATCSER.G<br>R.TFLPNLQNVTLSDALGK.S<br>K.TGDDQLSANAR.K<br>K.RTFLPNLQNVTLSDALGK.S<br>K.TGDDQLSANAR.K<br>R.SVEHNGSLDNLWLMK.T<br>K.TVGTIIGGAVGALAGR.A<br>R.GTGTGIIAGLAGLAGHIAGR.G<br>R.YNNGGLVSTANLMDLGLAGR.S<br>R.LLIAEAYESAPFAAGIDR.G<br>R.LVYDAANQR.L<br>R.VVAFATNAAGQSDYYDGLAPK.I<br>R.GTAVAIETTASNLR.S<br>R.TISSADDQLR.A<br>R.SIADVAAEGTAGITAALGPNDPGIVR.V<br>R.IAEASVGAASR.S<br>R.AQGVTDIIIDFR.Y<br>R.GSGDCEDFAILKMQMLR.A<br>K.LDNVKAAPAK.V<br>R.STSALLSSTINR.E<br>R.VAREACGACHMEVIEATER.S<br>R.LEEPGRDLK.Q<br>R.DEMFQLGRHQLT.P<br>K.LFDVTNLQPVAVPVGTVR.L<br>R.YDSFLGVQELFVDK.H<br>R.QTIFPAGGGRALINR.N<br>K.GDDWFFVANAVSDTVFEP.R.T<br>R.SFLNDPAALTGAVAFADR.S<br>K.AVTGAYLSSGNAFSTR.T<br>R.SPDAPIFGTDVSLQK.A<br>R.LQNGIQIPGVSVPYR.G<br>R.ATATTSAPNPGDNDIQVTFPAEGGAIK.A<br>R.AGTGASVAAPLTAEAR.A<br>R.IINEFTGVLTK.G<br>R.HIGADVDPAGDIGVGR.E<br>K.SAVISGSGNVATHAAEK.I<br>R.TEATGYGAVYFLANMLAAK.G<br>K.AANAAGVAVSGLMSQNSAR.R<br>R.VQNNNAISPKK.G<br>K.FLAFQTFK.N<br>R.VQREPDSDAWTALGAAR.F<br>R.APTADEMPVAAR.A<br>K.AVALSPESAGLWSALGEAR.V<br>K.AAQALKDGAANPAAGR.L<br>K.DGIAANPAAGR.L<br>R.FDMGNFVGAAYEK.A<br>R.DGGAPVHNPATGALVGVVEADAADAADAVATAR.A<br>R.LSTEEGVLMCLAEALLRVPDNATANALIR.D<br>R.VPDNATANALIR.D<br>R.NQIGAVGSPQFGR.G<br>R.LLENGANSFVHQFSDPDVSAEELIDPR.S<br>R.GYDLGDRGVPEALVAALGAAR.R<br>R.AQTLGLGDFPVFTAK.L<br>R.LPADAILYLNESR.Y                                                                                                                                                                                                                                                                                                                                                                                                                                                                                                                                                                                                                                                                                                                                                                                                                                                                                                                                                                                                                                                                                                                                                                                                                                                                                                                                                                                                                                                                                                                                                                                                                                                      |
| YP_617793 | Sala_2755 | peptidase S41                                   | 30.12%            | 9                       | R.HKVDAPSGTALLGEAAAEGR.G<br>R.HHLLDDAAR.D<br>R.DVAVLQGTNTSLGVTLLAHLV.E<br>R.GRDGLTGR.G<br>K.VDAPSGTALLGEAAAEGR.G<br>R.MGVAAAAI5EAGQR.S<br>R.GGTVAGDHDVFAGPEEMITLSHR.A<br>R.GISLATCSER.G<br>R.TFLPNLQNVTLSDALGK.S<br>K.TGDDQLSANAR.K<br>K.RTFLPNLQNVTLSDALGK.S<br>K.TGDDQLSANAR.K<br>R.SVEHNGSLDNLWLMK.T<br>K.TVGTIIGGAVGALAGR.A<br>R.GTGTGIIAGLAGLAGHIAGR.G<br>R.YNNGGLVSTANLMDLGLAGR.S<br>R.LLIAEAYESAPFAAGIDR.G<br>R.LVYDAANQR.L<br>R.VVAFATNAAGQSDYYDGLAPK.I<br>R.GTAVAIETTASNLR.S<br>R.TISSADDQLR.A<br>R.SIADVAAEGTAGITAALGPNDPGIVR.V<br>R.IAEASVGAASR.S<br>R.AQGVTDIIIDFR.Y<br>R.GSGDCEDFAILKMQMLR.A<br>K.LDNVKAAPAK.V<br>R.STSALLSSTINR.E<br>R.VAREACGACHMEVIEATER.S<br>R.LEEPGRDLK.Q<br>R.DEMFQLGRHQLT.P<br>K.LFDVTNLQPVAVPVGTVR.L<br>R.YDSFLGVQELFVDK.H<br>R.QTIFPAGGGRALINR.N<br>K.GDDWFFVANAVSDTVFEP.R.T<br>R.SFLNDPAALTGAVAFADR.S<br>K.AVTGAYLSSGNAFSTR.T<br>R.SPDAPIFGTDVSLQK.A<br>R.LQNGIQIPGVSVPYR.G<br>R.ATATTSAPNPGDNDIQVTFPAEGGAIK.A<br>R.AGTGASVAAPLTAEAR.A<br>R.IINEFTGVLTK.G<br>R.HIGADVDPAGDIGVGR.E<br>K.SAVISGSGNVATHAAEK.I<br>R.TEATGYGAVYFLANMLAAK.G<br>K.AANAAGVAVSGLMSQNSAR.R<br>R.VQNNNAISPKK.G<br>K.FLAFQTFK.N<br>R.VQREPDSDAWTALGAAR.F<br>R.APTADEMPVAAR.A<br>K.AVALSPESAGLWSALGEAR.V<br>K.AAQALKDGAANPAAGR.L<br>K.DGIAANPAAGR.L<br>R.FDMGNFVGAAYEK.A<br>R.DGGAPVHNPATGALVGVVEADAADAADAVATAR.A<br>R.LSTEEGVLMCLAEALLRVPDNATANALIR.D<br>R.VPDNATANALIR.D<br>R.NQIGAVGSPQFGR.G<br>R.LLENGANSFVHQFSDPDVSAEELIDPR.S<br>R.GYDLGDRGVPEALVAALGAAR.R<br>R.AQTLGLGDFPVFTAK.L<br>R.LPADAILYLNESR.Y                                                                                                                                                                                                                                                                                                                                                                                                                                                                                                                                                                                                                                                                                                                                                                                                                                                                                                                                                                                                                                                                                                                                                                                                                                                                                                                                                                                                                                                                                                                                                                                                                                                      |
| YP_617796 | Sala_2758 | periplasmic protein-like protein                | 8.09%             | 2                       | R.HKVDAPSGTALLGEAAAEGR.G<br>R.HHLLDDAAR.D<br>R.DVAVLQGTNTSLGVTLLAHLV.E<br>R.GRDGLTGR.G<br>K.VDAPSGTALLGEAAAEGR.G<br>R.MGVAAAAI5EAGQR.S<br>R.GGTVAGDHDVFAGPEEMITLSHR.A<br>R.GISLATCSER.G<br>R.TFLPNLQNVTLSDALGK.S<br>K.TGDDQLSANAR.K<br>K.RTFLPNLQNVTLSDALGK.S<br>K.TGDDQLSANAR.K<br>R.SVEHNGSLDNLWLMK.T<br>K.TVGTIIGGAVGALAGR.A<br>R.GTGTGIIAGLAGLAGHIAGR.G<br>R.YNNGGLVSTANLMDLGLAGR.S<br>R.LLIAEAYESAPFAAGIDR.G<br>R.LVYDAANQR.L<br>R.VVAFATNAAGQSDYYDGLAPK.I<br>R.GTAVAIETTASNLR.S<br>R.TISSADDQLR.A<br>R.SIADVAAEGTAGITAALGPNDPGIVR.V<br>R.IAEASVGAASR.S<br>R.AQGVTDIIIDFR.Y<br>R.GSGDCEDFAILKMQMLR.A<br>K.LDNVKAAPAK.V<br>R.STSALLSSTINR.E<br>R.VAREACGACHMEVIEATER.S<br>R.LEEPGRDLK.Q<br>R.DEMFQLGRHQLT.P<br>K.LFDVTNLQPVAVPVGTVR.L<br>R.YDSFLGVQELFVDK.H<br>R.QTIFPAGGGRALINR.N<br>K.GDDWFFVANAVSDTVFEP.R.T<br>R.SFLNDPAALTGAVAFADR.S<br>K.AVTGAYLSSGNAFSTR.T<br>R.SPDAPIFGTDVSLQK.A<br>R.LQNGIQIPGVSVPYR.G<br>R.ATATTSAPNPGDNDIQVTFPAEGGAIK.A<br>R.AGTGASVAAPLTAEAR.A<br>R.IINEFTGVLTK.G<br>R.HIGADVDPAGDIGVGR.E<br>K.SAVISGSGNVATHAAEK.I<br>R.TEATGYGAVYFLANMLAAK.G<br>K.AANAAGVAVSGLMSQNSAR.R<br>R.VQNNNAISPKK.G<br>K.FLAFQTFK.N<br>R.VQREPDSDAWTALGAAR.F<br>R.APTADEMPVAAR.A<br>K.AVALSPESAGLWSALGEAR.V<br>K.AAQALKDGAANPAAGR.L<br>K.DGIAANPAAGR.L<br>R.FDMGNFVGAAYEK.A<br>R.DGGAPVHNPATGALVGVVEADAADAADAVATAR.A<br>R.LSTEEGVLMCLAEALLRVPDNATANALIR.D<br>R.VPDNATANALIR.D<br>R.NQIGAVGSPQFGR.G<br>R.LLENGANSFVHQFSDPDVSAEELIDPR.S<br>R.GYDLGDRGVPEALVAALGAAR.R<br>R.AQTLGLGDFPVFTAK.L<br>R.LPADAILYLNESR.Y                                                                                                                                                                                                                                                                                                                                                                                                                                                                                                                                                                                                                                                                                                                                                                                                                                                                                                                                                                                                                                                                                                                                                                                                                                                                                                                                                                                                                                                                                                                                                                                                                                                      |
| YP_61805  | Sala_2767 | LVIDD                                           | 5.24%             | 5                       | R.HKVDAPSGTALLGEAAAEGR.G<br>R.HHLLDDAAR.D<br>R.DVAVLQGTNTSLGVTLLAHLV.E<br>R.GRDGLTGR.G<br>K.VDAPSGTALLGEAAAEGR.G<br>R.MGVAAAAI5EAGQR.S<br>R.GGTVAGDHDVFAGPEEMITLSHR.A<br>R.GISLATCSER.G<br>R.TFLPNLQNVTLSDALGK.S<br>K.TGDDQLSANAR.K<br>K.RTFLPNLQNVTLSDALGK.S<br>K.TGDDQLSANAR.K<br>R.SVEHNGSLDNLWLMK.T<br>K.TVGTIIGGAVGALAGR.A<br>R.GTGTGIIAGLAGLAGHIAGR.G<br>R.YNNGGLVSTANLMDLGLAGR.S<br>R.LLIAEAYESAPFAAGIDR.G<br>R.LVYDAANQR.L<br>R.VVAFATNAAGQSDYYDGLAPK.I<br>R.GTAVAIETTASNLR.S<br>R.TISSADDQLR.A<br>R.SIADVAAEGTAGITAALGPNDPGIVR.V<br>R.IAEASVGAASR.S<br>R.AQGVTDIIIDFR.Y<br>R.GSGDCEDFAILKMQMLR.A<br>K.LDNVKAAPAK.V<br>R.STSALLSSTINR.E<br>R.VAREACGACHMEVIEATER.S<br>R.LEEPGRDLK.Q<br>R.DEMFQLGRHQLT.P<br>K.LFDVTNLQPVAVPVGTVR.L<br>R.YDSFLGVQELFVDK.H<br>R.QTIFPAGGGRALINR.N<br>K.GDDWFFVANAVSDTVFEP.R.T<br>R.SFLNDPAALTGAVAFADR.S<br>K.AVTGAYLSSGNAFSTR.T<br>R.SPDAPIFGTDVSLQK.A<br>R.LQNGIQIPGVSVPYR.G<br>R.ATATTSAPNPGDNDIQVTFPAEGGAIK.A<br>R.AGTGASVAAPLTAEAR.A<br>R.IINEFTGVLTK.G<br>R.HIGADVDPAGDIGVGR.E<br>K.SAVISGSGNVATHAAEK.I<br>R.TEATGYGAVYFLANMLAAK.G<br>K.AANAAGVAVSGLMSQNSAR.R<br>R.VQNNNAISPKK.G<br>K.FLAFQTFK.N<br>R.VQREPDSDAWTALGAAR.F<br>R.APTADEMPVAAR.A<br>K.AVALSPESAGLWSALGEAR.V<br>K.AAQALKDGAANPAAGR.L<br>K.DGIAANPAAGR.L<br>R.FDMGNFVGAAYEK.A<br>R.DGGAPVHNPATGALVGVVEADAADAADAVATAR.A<br>R.LSTEEGVLMCLAEALLRVPDNATANALIR.D<br>R.VPDNATANALIR.D<br>R.NQIGAVGSPQFGR.G<br>R.LLENGANSFVHQFSDPDVSAEELIDPR.S<br>R.GYDLGDRGVPEALVAALGAAR.R<br>R.AQTLGLGDFPVFTAK.L<br>R.LPADAILYLNESR.Y                                                                                                                                                                                                                                                                                                                                                                                                                                                                                                                                                                                                                                                                                                                                                                                                                                                                                                                                                                                                                                                                                                                                                                                                                                                                                                                                                                                                                                                                                                                                                                                                                                                      |
| YP_61807  | Sala_2769 | hypothetical protein                            | 17.33%            | 6                       | R.HKVDAPSGTALLGEAAAEGR.G<br>R.HHLLDDAAR.D<br>R.DVAVLQGTNTSLGVTLLAHLV.E<br>R.GRDGLTGR.G<br>K.VDAPSGTALLGEAAAEGR.G<br>R.MGVAAAAI5EAGQR.S<br>R.GGTVAGDHDVFAGPEEMITLSHR.A<br>R.GISLATCSER.G<br>R.TFLPNLQNVTLSDALGK.S<br>K.TGDDQLSANAR.K<br>K.RTFLPNLQNVTLSDALGK.S<br>K.TGDDQLSANAR.K<br>R.SVEHNGSLDNLWLMK.T<br>K.TVGTIIGGAVGALAGR.A<br>R.GTGTGIIAGLAGLAGHIAGR.G<br>R.YNNGGLVSTANLMDLGLAGR.S<br>R.LLIAEAYESAPFAAGIDR.G<br>R.LVYDAANQR.L<br>R.VVAFATNAAGQSDYYDGLAPK.I<br>R.GTAVAIETTASNLR.S<br>R.TISSADDQLR.A<br>R.SIADVAAEGTAGITAALGPNDPGIVR.V<br>R.IAEASVGAASR.S<br>R.AQGVTDIIIDFR.Y<br>R.GSGDCEDFAILKMQMLR.A<br>K.LDNVKAAPAK.V<br>R.STSALLSSTINR.E<br>R.VAREACGACHMEVIEATER.S<br>R.LEEPGRDLK.Q<br>R.DEMFQLGRHQLT.P<br>K.LFDVTNLQPVAVPVGTVR.L<br>R.YDSFLGVQELFVDK.H<br>R.QTIFPAGGGRALINR.N<br>K.GDDWFFVANAVSDTVFEP.R.T<br>R.SFLNDPAALTGAVAFADR.S<br>K.AVTGAYLSSGNAFSTR.T<br>R.SPDAPIFGTDVSLQK.A<br>R.LQNGIQIPGVSVPYR.G<br>R.ATATTSAPNPGDNDIQVTFPAEGGAIK.A<br>R.AGTGASVAAPLTAEAR.A<br>R.IINEFTGVLTK.G<br>R.HIGADVDPAGDIGVGR.E<br>K.SAVISGSGNVATHAAEK.I<br>R.TEATGYGAVYFLANMLAAK.G<br>K.AANAAGVAVSGLMSQNSAR.R<br>R.VQNNNAISPKK.G<br>K.FLAFQTFK.N<br>R.VQREPDSDAWTALGAAR.F<br>R.APTADEMPVAAR.A<br>K.AVALSPESAGLWSALGEAR.V<br>K.AAQALKDGAANPAAGR.L<br>K.DGIAANPAAGR.L<br>R.FDMGNFVGAAYEK.A<br>R.DGGAPVHNPATGALVGVVEADAADAADAVATAR.A<br>R.LSTEEGVLMCLAEALLRVPDNATANALIR.D<br>R.VPDNATANALIR.D<br>R.NQIGAVGSPQFGR.G<br>R.LLENGANSFVHQFSDPDVSAEELIDPR.S<br>R.GYDLGDRGVPEALVAALGAAR.R<br>R.AQTLGLGDFPVFTAK.L<br>R.LPADAILYLNESR.Y                                                                                                                                                                                                                                                                                                                                                                                                                                                                                                                                                                                                                                                                                                                                                                                                                                                                                                                                                                                                                                                                                                                                                                                                                                                                                                                                                                                                                                                                                                                                                                                                                                                      |
| YP_61809  | Sala_2771 | Glutamate dehydrogenase (NADP+)                 | 23.50%            | 7                       | R.HKVDAPSGTALLGEAAAEGR.G<br>R.HHLLDDAAR.D<br>R.DVAVLQGTNTSLGVTLLAHLV.E<br>R.GRDGLTGR.G<br>K.VDAPSGTALLGEAAAEGR.G<br>R.MGVAAAAI5EAGQR.S<br>R.GGTVAGDHDVFAGPEEMITLSHR.A<br>R.GISLATCSER.G<br>R.TFLPNLQNVTLSDALGK.S<br>K.TGDDQLSANAR.K<br>K.RTFLPNLQNVTLSDALGK.S<br>K.TGDDQLSANAR.K<br>R.SVEHNGSLDNLWLMK.T<br>K.TVGTIIGGAVGALAGR.A<br>R.GTGTGIIAGLAGLAGHIAGR.G<br>R.YNNGGLVSTANLMDLGLAGR.S<br>R.LLIAEAYESAPFAAGIDR.G<br>R.LVYDAANQR.L<br>R.VVAFATNAAGQSDYYDGLAPK.I<br>R.GTAVAIETTASNLR.S<br>R.TISSADDQLR.A<br>R.SIADVAAEGTAGITAALGPNDPGIVR.V<br>R.IAEASVGAASR.S<br>R.AQGVTDIIIDFR.Y<br>R.GSGDCEDFAILKMQMLR.A<br>K.LDNVKAAPAK.V<br>R.STSALLSSTINR.E<br>R.VAREACGACHMEVIEATER.S<br>R.LEEPGRDLK.Q<br>R.DEMFQLGRHQLT.P<br>K.LFDVTNLQPVAVPVGTVR.L<br>R.YDSFLGVQELFVDK.H<br>R.QTIFPAGGGRALINR.N<br>K.GDDWFFVANAVSDTVFEP.R.T<br>R.SFLNDPAALTGAVAFADR.S<br>K.AVTGAYLSSGNAFSTR.T<br>R.SPDAPIFGTDVSLQK.A<br>R.LQNGIQIPGVSVPYR.G<br>R.ATATTSAPNPGDNDIQVTFPAEGGAIK.A<br>R.AGTGASVAAPLTAEAR.A<br>R.IINEFTGVLTK.G<br>R.HIGADVDPAGDIGVGR.E<br>K.SAVISGSGNVATHAAEK.I<br>R.TEATGYGAVYFLANMLAAK.G<br>K.AANAAGVAVSGLMSQNSAR.R<br>R.VQNNNAISPKK.G<br>K.FLAFQTFK.N<br>R.VQREPDSDAWTALGAAR.F<br>R.APTADEMPVAAR.A<br>K.AVALSPESAGLWSALGEAR.V<br>K.AAQALKDGAANPAAGR.L<br>K.DGIAANPAAGR.L<br>R.FDMGNFVGAAYEK.A<br>R.DGGAPVHNPATGALVGVVEADAADAADAVATAR.A<br>R.LSTEEGVLMCLAEALLRVPDNATANALIR.D<br>R.VPDNATANALIR.D<br>R.NQIGAVGSPQFGR.G<br>R.LLENGANSFVHQFSDPDVSAEELIDPR.S<br>R.GYDLGDRGVPEALVAALGAAR.R<br>R.AQTLGLGDFPVFTAK.L<br>R.LPADAILYLNESR.Y                                                                                                                                                                                                                                                                                                                                                                                                                                                                                                                                                                                                                                                                                                                                                                                                                                                                                                                                                                                                                                                                                                                                                                                                                                                                                                                                                                                                                                                                                                                                                                                                                                                      |
| YP_61810  | Sala_2772 | TPR repeat                                      | 25.95%            | 6                       | R.HKVDAPSGTALLGEAAAEGR.G<br>R.HHLLDDAAR.D<br>R.DVAVLQGTNTSLGVTLLAHLV.E<br>R.GRDGLTGR.G<br>K.VDAPSGTALLGEAAAEGR.G<br>R.MGVAAAAI5EAGQR.S<br>R.GGTVAGDHDVFAGPEEMITLSHR.A<br>R.GISLATCSER.G<br>R.TFLPNLQNVTLSDALGK.S<br>K.TGDDQLSANAR.K<br>K.RTFLPNLQNVTLSDALGK.S<br>K.TGDDQLSANAR.K<br>R.SVEHNGSLDNLWLMK.T<br>K.TVGTIIGGAVGALAGR.A<br>R.GTGTGIIAGLAGLAGHIAGR.G<br>R.YNNGGLVSTANLMDLGLAGR.S<br>R.LLIAEAYESAPFAAGIDR.G<br>R.LVYDAANQR.L<br>R.VVAFATNAAGQSDYYDGLAPK.I<br>R.GTAVAIETTASNLR.S<br>R.TISSADDQLR.A<br>R.SIADVAAEGTAGITAALGPNDPGIVR.V<br>R.IAEASVGAASR.S<br>R.AQGVTDIIIDFR.Y<br>R.GSGDCEDFAILKMQMLR.A<br>K.LDNVKAAPAK.V<br>R.STSALLSSTINR.E<br>R.VAREACGACHMEVIEATER.S<br>R.LEEPGRDLK.Q<br>R.DEMFQLGRHQLT.P<br>K.LFDVTNLQPVAVPVGTVR.L<br>R.YDSFLGVQELFVDK.H<br>R.QTIFPAGGGRALINR.N<br>K.GDDWFFVANAVSDTVFEP.R.T<br>R.SFLNDPAALTGAVAFADR.S<br>K.AVTGAYLSSGNAFSTR.T<br>R.SPDAPIFGTDVSLQK.A<br>R.LQNGIQIPGVSVPYR.G<br>R.ATATTSAPNPGDNDIQVTFPAEGGAIK.A<br>R.AGTGASVAAPLTAEAR.A<br>R.IINEFTGVLTK.G<br>R.HIGADVDPAGDIGVGR.E<br>K.SAVISGSGNVATHAAEK.I<br>R.TEATGYGAVYFLANMLAAK.G<br>K.AANAAGVAVSGLMSQNSAR.R<br>R.VQNNNAISPKK.G<br>K.FLAFQTFK.N<br>R.VQREPDSDAWTALGAAR.F<br>R.APTADEMPVAAR.A<br>K.AVALSPESAGLWSALGEAR.V<br>K.AAQALKDGAANPAAGR.L<br>K.DGIAANPAAGR.L<br>R.FDMGNFVGAAYEK.A<br>R.DGGAPVHNPATGALVGVVEADAADAADAVATAR.A<br>R.LSTEEGVLMCLAEALLRVPDNATANALIR.D<br>R.VPDNATANALIR.D<br>R.NQIGAVGSPQFGR.G<br>R.LLENGANSFVHQFSDPDVSAEELIDPR.S<br>R.GYDLGDRGVPEALVAALGAAR.R<br>R.AQTLGLGDFPVFTAK.L<br>R.LPADAILYLNESR.Y                                                                                                                                                                                                                                                                                                                                                                                                                                                                                                                                                                                                                                                                                                                                                                                                                                                                                                                                                                                                                                                                                                                                                                                                                                                                                                                                                                                                                                                                                                                                                                                                                                                      |
| YP_61811  | Sala_2773 | delta-1-pyrroline-5-carboxylate dehydrogenase   | 14.06%            | 7                       | R.HKVDAPSGTALLGEAAAEGR.G<br>R.HHLLDDAAR.D<br>R.DVAVLQGTNTSLGVTLLAHLV.E<br>R.GRDGLTGR.G<br>K.VDAPSGTALLGEAAAEGR.G<br>R.MGVAAAAI5EAGQR.S<br>R.GGTVAGDHDVFAGPEEMITLSHR.A<br>R.GISLATCSER.G<br>R.TFLPNLQNVTLSDALGK.S<br>K.TGDDQLSANAR.K<br>K.RTFLPNLQNVTLSDALGK.S<br>K.TGDDQLSANAR.K<br>R.SVEHNGSLDNLWLMK.T<br>K.TVGTIIGGAVGALAGR.A<br>R.GTGTGIIAGLAGLAGHIAGR.G<br>R.YNNGGLVSTANLMDLGLAGR.S<br>R.LLIAEAYESAPFAAGIDR.G<br>R.LVYDAANQR.L<br>R.VVAFATNAAGQSDYYDGLAPK.I<br>R.GTAVAIETTASNLR.S<br>R.TISSADDQLR.A<br>R.SIADVAAEGTAGITAALGPNDPGIVR.V<br>R.IAEASVGAASR.S<br>R.AQGVTDIIIDFR.Y<br>R.GSGDCEDFAILKMQMLR.A<br>K.LDNVKAAPAK.V<br>R.STSALLSSTINR.E<br>R.VAREACGACHMEVIEATER.S<br>R.LEEPGRDLK.Q<br>R.DEMFQLGRHQLT.P<br>K.LFDVTNLQPVAVPVGTVR.L<br>R.YDSFLGVQELFVDK.H<br>R.QTIFPAGGGRALINR.N<br>K.GDDWFFVANAVSDTVFEP.R.T<br>R.SFLNDPAALTGAVAFADR.S<br>K.AVTGAYLSSGNAFSTR.T<br>R.SPDAPIFGTDVSLQK.A<br>R.LQNGIQIPGVSVPYR.G<br>R.ATATTSAPNPGDNDIQVTFPAEGGAIK.A<br>R.AGTGASVAAPLTAEAR.A<br>R.IINEFTGVLTK.G<br>R.HIGADVDPAGDIGVGR.E<br>K.SAVISGSGNVATHAAEK.I<br>R.TEATGYGAVYFLANMLAAK.G<br>K.AANAAGVAVSGLMSQNSAR.R<br>R.VQNNNAISPKK.G<br>K.FLAFQTFK.N<br>R.VQREPDSDAWTALGAAR.F<br>R.APTADEMPVAAR.A<br>K.AVALSPESAGLWSALGEAR.V<br>K.AAQALKDGAANPAAGR.L<br>K.DGIAANPAAGR.L<br>R.FDMGNFVGAAYEK.A<br>R.DGGAPVHNPATGALVGVVEADAADAADAVATAR.A<br>R.LSTEEGVLMCLAEALLRVPDNATANALIR.D<br>R.VPDNATANALIR.D<br>R.NQIGAVGSPQFGR.G<br>R.LLENGANSFVHQFSDPDVSAEELIDPR.S<br>R.GYDLGDRGVPEALVAALGAAR.R<br>R.AQTLGLGDFPVFTAK.L<br>R.LPADAILYLNESR.Y                                                                                                                                                                                                                                                                                                                                                                                                                                                                                                                                                                                                                                                                                                                                                                                                                                                                                                                                                                                                                                                                                                                                                                                                                                                                                                                                                                                                                                                                                                                                                                                                                                                      |
| YP_61813  | Sala_2775 | transglutaminase-like protein                   | 30.27%            | 5                       | R.HKVDAPSGTALLGEAAAEGR.G<br>R.HHLLDDAAR.D<br>R.DVAVLQGTNTSLGVTLLAHLV.E<br>R.GRDGLTGR.G<br>K.VDAPSGTALLGEAAAEGR.G<br>R.MGVAAAAI5EAGQR.S<br>R.GGTVAGDHDVFAGPEEMITLSHR.A<br>R.GISLATCSER.G<br>R.TFLPNLQNVTLSDALGK.S<br>K.TGDDQLSANAR.K<br>K.RTFLPNLQNVTLSDALGK.S<br>K.TGDDQLSANAR.K<br>R.SVEHNGSLDNLWLMK.T<br>K.TVGTIIGGAVGALAGR.A<br>R.GTGTGIIAGLAGLAGHIAGR.G<br>R.YNNGGLVSTANLMDLGLAGR.S<br>R.LLIAEAYESAPFAAGIDR.G<br>R.LVYDAANQR.L<br>R.VVAFATNAAGQSDYYDGLAPK.I<br>R.GTAVAIETTASNLR.S<br>R.TISSADDQLR.A<br>R.SIADVAAEGTAGITAALGPNDPGIVR.V<br>R.IAEASVGAASR.S<br>R.AQGVTDIIIDFR.Y<br>R.GSGDCEDFAILKMQMLR.A<br>K.LDNVKAAPAK.V<br>R.STSALLSSTINR.E<br>R.VAREACGACHMEVIEATER.S<br>R.LEEPGRDLK.Q<br>R.DEMFQLGRHQLT.P<br>K.LFDVTNLQPVAVPVGTVR.L<br>R.YDSFLGVQELFVDK.H<br>R.QTIFPAGGGRALINR.N<br>K.GDDWFFVANAVSDTVFEP.R.T<br>R.SFLNDPAALTGAVAFADR.S<br>K.AVTGAYLSSGNAFSTR.T<br>R.SPDAPIFGTDVSLQK.A<br>R.LQNGIQIPGVSVPYR.G<br>R.ATATTSAPNPGDNDIQVTFPAEGGAIK.A<br>R.AGTGASVAAPLTAEAR.A<br>R.IINEFTGVLTK.G<br>R.HIGADVDPAGDIGVGR.E<br>K.SAVISGSGNVATHAAEK.I<br>R.TEATGYGAVYFLANMLAAK.G<br>K.AANAAGVAVSGLMSQNSAR.R<br>R.VQNNNAISPKK.G<br>K.FLAFQTFK.N<br>R.VQREPDSDAWTALGAAR.F<br>R.APTADEMPVAAR.A<br>K.AVALSPESAGLWSALGEAR.V<br>K.AAQALKDGAANPAAGR.L<br>K.DGIAANPAAGR.L<br>R.FDMGNFVGAAYEK.A<br>R.DGGAPVHNPATGALVGVVEADAADAADAVATAR.A<br>R.LSTEEGVLMCLAEALLRVPDNATANALIR.D<br>R.VPDNATANALIR.D<br>R.NQIGAVGSPQFGR.G<br>R.LLENGANSFVHQFSDPDVSAEELIDPR.S<br>R.GYDLGDRGVPEALVAALGAAR.R<br>R.AQTLGLGDFPVFTAK.L<br>R.LPADAILYLNESR.Y                                                                                                                                                                                                                                                                                                                                                                                                                                                                                                                                                                                                                                                                                                                                                                                                                                                                                                                                                                                                                                                                                                                                                                                                                                                                                                                                                                                                                                                                                                                                                                                                                                                      |



| Accession | Locus tag | Description                   | Sequence coverage | No. peptides identified | List of peptides identified                                                                                                                                                                                                                                                                                                                                                                                                                                                                                                                                                                                                                                                                                                                                                                                                                                                                                                                                                                                                                                                                                                                                                                                                                                                                                                                                                                                                                                                                                                                                                                                                                                                                                                                                                                                                                                                                                                                                                                                                                                                                                                                                                                                                                                                                                                                                                                                                                                                                                                                                                                                                                                                                                                                                                                                                                                                                                                                                                                                                                                                                                                                                                                              |
|-----------|-----------|-------------------------------|-------------------|-------------------------|----------------------------------------------------------------------------------------------------------------------------------------------------------------------------------------------------------------------------------------------------------------------------------------------------------------------------------------------------------------------------------------------------------------------------------------------------------------------------------------------------------------------------------------------------------------------------------------------------------------------------------------------------------------------------------------------------------------------------------------------------------------------------------------------------------------------------------------------------------------------------------------------------------------------------------------------------------------------------------------------------------------------------------------------------------------------------------------------------------------------------------------------------------------------------------------------------------------------------------------------------------------------------------------------------------------------------------------------------------------------------------------------------------------------------------------------------------------------------------------------------------------------------------------------------------------------------------------------------------------------------------------------------------------------------------------------------------------------------------------------------------------------------------------------------------------------------------------------------------------------------------------------------------------------------------------------------------------------------------------------------------------------------------------------------------------------------------------------------------------------------------------------------------------------------------------------------------------------------------------------------------------------------------------------------------------------------------------------------------------------------------------------------------------------------------------------------------------------------------------------------------------------------------------------------------------------------------------------------------------------------------------------------------------------------------------------------------------------------------------------------------------------------------------------------------------------------------------------------------------------------------------------------------------------------------------------------------------------------------------------------------------------------------------------------------------------------------------------------------------------------------------------------------------------------------------------------------|
|           |           |                               |                   |                         | R.DRNIFGSLLLK.M<br>R.DLTEALVGDVFLGLSAAGALKPEMVK.D<br>R.LMEIVPAAVAK.A<br>R.EALLYHEHGRPK.I<br>K.MGLGDMITGTR.T<br>K.GNLVAVISNGTALGLGNLALASK.P<br>R.SDYPNQVNVVLCFFIFR.G<br>R.RVIDHAEKG.T<br>R.KGTIYQGR.T<br>R.DLTEALVGDVFLGLSAAGALKPEMVK.D<br>K.GNLVAVISNGTALGLGNLALASKPVMEGK.A<br>R.VIDHAEKG.T<br>R.LSGPANLVMPGLQSANLSAK.L<br>R.AMGVADAESEFEVHNSVPHVPMVMDMLYER.L<br>K.RFADVDSIDLEVDTEDPQR.F<br>K.IEIVASKPMATQR.D<br>R.QGYVVDPALTEAITPGVDNR.E<br>R.SFFEDIFGNI GAVGAPGAGAPTGP.<br>R.TLGRPTVFGQGTGEYYSR.E<br>R.QGYVVDPALTEAITPGVDNRSEVER.T<br>R.IRFDAAGNVAADR.T<br>K.ISPEGDKPTLGR.E<br>R.FDAAGNVAADR.T<br>R.ERSFFEDIFGNI GAVGAPGAGAPTGP.<br>R.TGLELVSK.I<br>R.PIQQVLR.I<br>R.GKAPDDAALTHVMAAVALR.G<br>R.RPLWNVAVATAR.A<br>R.GALAAMPVAELVATDRPLGAQG.<br>R.AVAGGFAATGEIR.A<br>R.DJAVEADAGAR.A<br>R.ADLGEAAVQTLSLALDPPFR.H<br>R.DVDAPVGEDEEIEIGRDELDPLEGR.D<br>R.LGLALDHFALTSR.A<br>K.LPDDADAGLSVQHAR.I<br>K.VADJAPAVDR.V<br>K.AAEADAPDAEVPAAK.D<br>R.GLAELGALPPTRDEK.A<br>K.VIDQSETGFTVAHTAQVAAAPADVWK.M<br>R.ILFARPNELLR.L<br>R.FKVADJAPAVDR.V<br>R.FDYVVGMYR.F<br>K.DHSWSGDAANFWLDSQAGCFCEK.L<br>R.TAAQADALDGLSAR.G<br>R.LDELGPVSVIFDGYPR.T<br>R.RPDDNEDTVR.T<br>K.AVMDAGELVSDAIVSGLIGER.L<br>R.TLDHVELVDEDALVDR.I<br>R.VDGMAPIDRVNDAIETILGTAG.<br>R.VNDAIETILGTAG.<br>R.LEDEHGMVQLSTGDMR.L<br>.MTLNILLGPPGAGK.G<br>K.VADICDVGSK.E<br>K.RRPDDNEDTVR.T<br>K.AVMDAGELVSDAIVSGLIGER.L<br>R.VDGMAPIDR.V<br>R.LEDEHGMVQLSTGDMR.L<br>R.GRTLHVELVDEDALVDR.I<br>R.CGEGYHDR.V<br>K.GTQASRLDEHGMVQLSTGDMR.A<br>K.AVMDAGELVSDAIVSGLIGER.LDELGPVSVIFDGYPR.T<br>K.AGTPIGLQAK.A<br>R.ADQLASLNLFK.F<br>R.SFAQMFTQVR.E<br>K.QNGFTPGIRPGK.N<br>R.VLVQYPR.R<br>R.SFAQMFTQVR.E<br>K.NTATYLDVFLTR.I<br>K.FGQATEL.N<br>K.VTFAVAGASK.G<br>K.DFAIVNLGMVQK.L<br>K.ATIDHALK.A<br>K.AGGKVELPEAR.P<br>R.SGVAINFEGGQMPHMR.I<br>K.RGFNIFGK.D<br>K.GAIEAVEK.A<br>K.LNELRDNINGAR.K<br>R.SGVAINFEGGQMPHMR.I<br>R.GFNIFGKDFAINLGMVQK.L<br>R.GFNIFGK.D<br>K.VELPEARPEGDGK.K<br>K.DFAIVNLGMVQK.L<br>K.AGGKVELPEARPEGDGK.K<br>R.LLAKGELTAK.V<br>R.KAEAAAK.N<br>K.AGGKVELPEARPEGDGK.K<br>R.EVELDTPVPR.G<br>R.KILTGLGK.M<br>K.MHREVELDTPVPR.G<br>R.KLPHIVEVD.<br>K.IITGLGK.M<br>R.ATFEALGEQTSK.S<br>R.AVFESLGVADVTK.S<br>R.DEDGGEELIEK.L<br>R.FGFAALVVGDKG.G<br>R.GHFAGAVTLR.S<br>R.SAPAGTIIAGGPMR.A<br>K.SVGTSPNYMIR.A<br>R.FGFAALVVGDKGGR.A<br>K.AREVPAAISK.A<br>R.AAEAEAAVTE.<br>K.KVSDLIK.R<br>R.SAPAGTIIAGGPMR.A<br>K.SVGTSPNYMIR.A<br>K.RFGFAALVVGDKG.G<br>R.RPRDEGGEELIEK.L<br>R.EVPEAISK.A<br>K.LVHINR.V<br>R.HIYAQLIDDAAGTTLAAASTLDKDV.R.G<br>K.TGATTAADAVGK.L<br>K.AGVTQVVFDR.G<br>R.HIYAQLIDDAAGTTLAAASTLDK.D<br>K.KAGVTQVVFDR.G<br>K.TGATTAADAVGK.R<br>R.SKGTGATTAADAVGK.R<br>R.TLVQNLVGTGTEGFTK.V<br>K.AVEIPSGVTAIDGQQLSVK.G<br>K.YEVGDSISVQPANDSR.E<br>K.VLEITGVGYR.A<br>K.TPNDTTIEISIDKQQQVAAEIR.R<br>K.IQLQYSHVDVFAVPGIEIK.T<br>K.TPNDTTIEISIDK.Q<br>K.GTLAMLSDNK.Y<br>K.KAVEIPSGVTAIDGQQLSVK.G<br>K.QQVGVAAEIR.R<br>K.GTLAMLSDNK.YEVGDSISVQPANDSR.E<br>K.VRGEIFR.K<br>K.AVEIPSGVTAIDGQQLSVK.G<br>K.TPNDTTIEISIDKQQQVAAEIRR.W<br>K.KAVEIPSGVTAIDGQQLSVK.G<br>K.GTLAMLSDNK.YEVGDSISVQPANDSR.E<br>K.GTLAMLSDNK.Y<br>R.TLVQNLVGTGTEGFTKVLITGVGYR.A<br>R.NGLGTTIVSTR.G<br>R.EQNVGGEVLAEVF.<br>K.YFEGQPAIR.H<br>R.GVLSDAEAREQNVGGEVLAEVF. |
| YP_617831 | Sala_2793 | tmRNA-binding small protein A | 71.43%            | 10                      |                                                                                                                                                                                                                                                                                                                                                                                                                                                                                                                                                                                                                                                                                                                                                                                                                                                                                                                                                                                                                                                                                                                                                                                                                                                                                                                                                                                                                                                                                                                                                                                                                                                                                                                                                                                                                                                                                                                                                                                                                                                                                                                                                                                                                                                                                                                                                                                                                                                                                                                                                                                                                                                                                                                                                                                                                                                                                                                                                                                                                                                                                                                                                                                                          |
| YP_617832 | Sala_2794 | CBP3 protein                  | 30.68%            | 3                       |                                                                                                                                                                                                                                                                                                                                                                                                                                                                                                                                                                                                                                                                                                                                                                                                                                                                                                                                                                                                                                                                                                                                                                                                                                                                                                                                                                                                                                                                                                                                                                                                                                                                                                                                                                                                                                                                                                                                                                                                                                                                                                                                                                                                                                                                                                                                                                                                                                                                                                                                                                                                                                                                                                                                                                                                                                                                                                                                                                                                                                                                                                                                                                                                          |
| YP_617833 | Sala_2795 | hypothetical protein          | 50.00%            | 5                       |                                                                                                                                                                                                                                                                                                                                                                                                                                                                                                                                                                                                                                                                                                                                                                                                                                                                                                                                                                                                                                                                                                                                                                                                                                                                                                                                                                                                                                                                                                                                                                                                                                                                                                                                                                                                                                                                                                                                                                                                                                                                                                                                                                                                                                                                                                                                                                                                                                                                                                                                                                                                                                                                                                                                                                                                                                                                                                                                                                                                                                                                                                                                                                                                          |
| YP_617834 | Sala_2796 | hypothetical protein          | 55.98%            | 9                       |                                                                                                                                                                                                                                                                                                                                                                                                                                                                                                                                                                                                                                                                                                                                                                                                                                                                                                                                                                                                                                                                                                                                                                                                                                                                                                                                                                                                                                                                                                                                                                                                                                                                                                                                                                                                                                                                                                                                                                                                                                                                                                                                                                                                                                                                                                                                                                                                                                                                                                                                                                                                                                                                                                                                                                                                                                                                                                                                                                                                                                                                                                                                                                                                          |
| YP_617835 | Sala_2797 | adenylate kinases             | 79.00%            | 19                      |                                                                                                                                                                                                                                                                                                                                                                                                                                                                                                                                                                                                                                                                                                                                                                                                                                                                                                                                                                                                                                                                                                                                                                                                                                                                                                                                                                                                                                                                                                                                                                                                                                                                                                                                                                                                                                                                                                                                                                                                                                                                                                                                                                                                                                                                                                                                                                                                                                                                                                                                                                                                                                                                                                                                                                                                                                                                                                                                                                                                                                                                                                                                                                                                          |
| YP_617836 | Sala_2798 | SecY protein                  | 13.35%            | 7                       |                                                                                                                                                                                                                                                                                                                                                                                                                                                                                                                                                                                                                                                                                                                                                                                                                                                                                                                                                                                                                                                                                                                                                                                                                                                                                                                                                                                                                                                                                                                                                                                                                                                                                                                                                                                                                                                                                                                                                                                                                                                                                                                                                                                                                                                                                                                                                                                                                                                                                                                                                                                                                                                                                                                                                                                                                                                                                                                                                                                                                                                                                                                                                                                                          |
| YP_617837 | Sala_2799 | ribosomal protein L15         | 68.57%            | 17                      |                                                                                                                                                                                                                                                                                                                                                                                                                                                                                                                                                                                                                                                                                                                                                                                                                                                                                                                                                                                                                                                                                                                                                                                                                                                                                                                                                                                                                                                                                                                                                                                                                                                                                                                                                                                                                                                                                                                                                                                                                                                                                                                                                                                                                                                                                                                                                                                                                                                                                                                                                                                                                                                                                                                                                                                                                                                                                                                                                                                                                                                                                                                                                                                                          |
| YP_617838 | Sala_2800 | ribosomal protein L30         | 56.67%            | 5                       |                                                                                                                                                                                                                                                                                                                                                                                                                                                                                                                                                                                                                                                                                                                                                                                                                                                                                                                                                                                                                                                                                                                                                                                                                                                                                                                                                                                                                                                                                                                                                                                                                                                                                                                                                                                                                                                                                                                                                                                                                                                                                                                                                                                                                                                                                                                                                                                                                                                                                                                                                                                                                                                                                                                                                                                                                                                                                                                                                                                                                                                                                                                                                                                                          |
| YP_617839 | Sala_2801 | ribosomal protein S5          | 58.68%            | 17                      |                                                                                                                                                                                                                                                                                                                                                                                                                                                                                                                                                                                                                                                                                                                                                                                                                                                                                                                                                                                                                                                                                                                                                                                                                                                                                                                                                                                                                                                                                                                                                                                                                                                                                                                                                                                                                                                                                                                                                                                                                                                                                                                                                                                                                                                                                                                                                                                                                                                                                                                                                                                                                                                                                                                                                                                                                                                                                                                                                                                                                                                                                                                                                                                                          |
| YP_617840 | Sala_2802 | ribosomal protein L18         | 56.41%            | 7                       |                                                                                                                                                                                                                                                                                                                                                                                                                                                                                                                                                                                                                                                                                                                                                                                                                                                                                                                                                                                                                                                                                                                                                                                                                                                                                                                                                                                                                                                                                                                                                                                                                                                                                                                                                                                                                                                                                                                                                                                                                                                                                                                                                                                                                                                                                                                                                                                                                                                                                                                                                                                                                                                                                                                                                                                                                                                                                                                                                                                                                                                                                                                                                                                                          |
| YP_617841 | Sala_2803 | ribosomal protein L6          | 75.14%            | 18                      |                                                                                                                                                                                                                                                                                                                                                                                                                                                                                                                                                                                                                                                                                                                                                                                                                                                                                                                                                                                                                                                                                                                                                                                                                                                                                                                                                                                                                                                                                                                                                                                                                                                                                                                                                                                                                                                                                                                                                                                                                                                                                                                                                                                                                                                                                                                                                                                                                                                                                                                                                                                                                                                                                                                                                                                                                                                                                                                                                                                                                                                                                                                                                                                                          |
| YP_617842 | Sala_2804 | ribosomal protein S8          | 62.69%            | 12                      |                                                                                                                                                                                                                                                                                                                                                                                                                                                                                                                                                                                                                                                                                                                                                                                                                                                                                                                                                                                                                                                                                                                                                                                                                                                                                                                                                                                                                                                                                                                                                                                                                                                                                                                                                                                                                                                                                                                                                                                                                                                                                                                                                                                                                                                                                                                                                                                                                                                                                                                                                                                                                                                                                                                                                                                                                                                                                                                                                                                                                                                                                                                                                                                                          |



| Accession | Locus tag | Description                      | Sequence coverage | No. peptides identified | List of peptides identified                                                                                                                                                                                                                                                                                                                                                                                                                                                                                                                                                                                                                                                                                                                                                                                                                                                                                                                                                                                                                                                                                                                                                                                                                                                                                                                                                                                                                                                                                                                                                                                                                                                                                                                                                                                                                                                                                                                                                                                                                                                                                                                                                                                                                                                                                                                                                                                                                                                                                                                                                                                                                                                                                                                                                                                                                                                                                                                                                                                                                                                                                                                                                                                                                                                                                                                     |
|-----------|-----------|----------------------------------|-------------------|-------------------------|-------------------------------------------------------------------------------------------------------------------------------------------------------------------------------------------------------------------------------------------------------------------------------------------------------------------------------------------------------------------------------------------------------------------------------------------------------------------------------------------------------------------------------------------------------------------------------------------------------------------------------------------------------------------------------------------------------------------------------------------------------------------------------------------------------------------------------------------------------------------------------------------------------------------------------------------------------------------------------------------------------------------------------------------------------------------------------------------------------------------------------------------------------------------------------------------------------------------------------------------------------------------------------------------------------------------------------------------------------------------------------------------------------------------------------------------------------------------------------------------------------------------------------------------------------------------------------------------------------------------------------------------------------------------------------------------------------------------------------------------------------------------------------------------------------------------------------------------------------------------------------------------------------------------------------------------------------------------------------------------------------------------------------------------------------------------------------------------------------------------------------------------------------------------------------------------------------------------------------------------------------------------------------------------------------------------------------------------------------------------------------------------------------------------------------------------------------------------------------------------------------------------------------------------------------------------------------------------------------------------------------------------------------------------------------------------------------------------------------------------------------------------------------------------------------------------------------------------------------------------------------------------------------------------------------------------------------------------------------------------------------------------------------------------------------------------------------------------------------------------------------------------------------------------------------------------------------------------------------------------------------------------------------------------------------------------------------------------------|
| YP_617854 | Sala_2816 | Ribosomal protein L25/L23        | 57.84%            | 6                       | K.WDVPATVER.L<br>R.TAFIALVKYEDGELAYLAPQR.L<br>R.LEYDPNRITAFIALVK.Y<br>R.GVAKNPVDHPHGGGEGR.T<br>R.GLLLVDK.S<br>R.YIRGECMGTVGAVSNPDNQNTNLGK.A<br>R.YIRGECMGTVGAVSNPDNQNTNLGK.A<br>R.TAFIALVK.Y<br>R.RKWDVPATVER.L<br>R.LGSGEQR.Y<br>R.GECMGTVGAVSNPDNQNTNLGK.A<br>R.GECMGTVGAVSNPDNQNTNLGK.A<br>R.GLILVDKSALWK.G<br>R.HYDVLAPVITTEK.S<br>K.AAVEALFDVK.V<br>K.VGVNLTWTK.G<br>K.STLLENNAVVFV.V<br>R.LAEGQSIDVTTGV.<br>R.HYDVLAPVITTEKSTLLENNAVVFV.V<br>K.AGADIDLNDVFLGDAR.A<br>R.VVAWQLEK.R<br>R.RAPFIGGGK.A<br>K.LLVDTLELDAK.T<br>K.LVVDITLLEK.D<br>R.APIFIGGGK.A<br>K.IKVQLDGGK.A<br>R.VVAWQLEK.R<br>R.AAVEKLEAR.C<br>R.TFGHSLNKK.I<br>R.TFGHSLNK.K<br>R.ERSDVAR.T<br>R.ALFDIDGDAVHESFAMASANLIGVDALPAIGANVYDIVR.A<br>R.ADTLVLTR.A<br>K.VQTLDDGK.A<br>K.LLGLDLGK.R<br>K.MALSDKAK.G<br>K.LDLGKR.A<br>R.DGVVAVQLGAGTAK.A<br>R.TQQNLEIVR.T<br>R.ATHGVSHISH.A<br>K.SAANTITAPADAPVETPAEEAVVDTAATDGAQES.<br>R.NRTQQNLEIVR.T<br>R.VADDATLDVGAELSADHFVAGQVMDIQGVTVQK.G<br>R.HPEAPYPASIK.S<br>R.GAYKAEVEPK.A<br>K.GGWLVR.D<br>R.TQQNLEIVRDAER.G<br>R.HVPPVTVLSLEGCCQVSVR.D<br>R.DAVKLP.R<br>K.MAGHMGAR.N<br>R.AHGSTGNR.Q<br>K.AEVEPK.A<br>R.VLDQATTDIADTAR.R<br>R.LLDIVQPTQTVDALMK.L<br>R.VLDQATTDIADTARR.T<br>K.SREQFEVR.T<br>K.FTVNRGPHIDK.K<br>K.AFDHRVLDQATTDIADTAR.R<br>R.TVGAQVAVYTK.<br>K.LLDQQAQAGDNIGALIR.G<br>K.VLAENVAGNAADFANIDKAPPEER.E<br>K.VGEEVEIVGKDKT.K<br>R.GITISTAHVEYETESR.H<br>K.LLAPIAMPGLR.F<br>R.GVGREVEER.G<br>R.DDNIGKAILK.L<br>K.VGEEVEIVGK.D<br>R.GQVLAKPGSITPHTFTSEVYVLSK.D<br>K.TVTVGVEMFR.K<br>K.QVGVPTMVVFLNK.V<br>K.KTVTVGVEMFR.K<br>R.KLLDQQAQAGDNIGALIR.G<br>K.VDQLDDPELLELVELEIR.E<br>K.PGSITPHTFTSEVYVLSK.D<br>R.TTDVTEVILPEGTEMMPGDNVQLSVK.L<br>K.VLAENVAGNAADFANIDK.A<br>K.VDQLDDPELLELVELEIRELSK.R<br>K.TVTVGVEMFR.K<br>K.PGSITPHTFTSEVYVLSKDEGGR.H<br>K.EHILLAK.Q<br>R.HTPFFANRPQFYFR.T<br>R.ERGITISTAHVEYETESR.H<br>K.NMITGAAQMDGAILVSAADGMPQTK.E<br>K.TSLTAATK.V<br>K.QVGVPTMVVFLNKVDQLDDPELLELVELEIR.E<br>R.GTVTVGRVETGVVK.V<br>K.PFLMPIEDVFSISGR.G<br>R.PLDKPFMPIEDVFSISGR.G<br>R.HYAHVDCPHADYK.N<br>R.GQVLAKPGSITPHTFTSEVYVLSKDEGGR.H<br>K.VLAENVAGNAADFANIDKAPPEERER.G<br>K.VGEEVEIVGKDKT.K<br>K.TVTVGVEMFR.L<br>K.TVTVGVEMFR.K<br>K.NMITGAAQMDGAILVSAADGMPQTK.E<br>K.LLMAAVDIEWPQPERPLDK.P<br>K.KTVTVGVEMFR.L<br>R.VETGVVKVEEVEIVGK.D<br>R.VETGVVK.V<br>R.TKPHCNIGTIGHVDHGK.T<br>R.HTPFFANR.P<br>K.QVGVPTMVVFLNK.V<br>K.NMITGAAQMDGAILVSAADGMPQTK.E<br>K.NMITGAAQMDGAILVSAADGMPQTK.E<br>K.NMITGAAQMDGAILVSAADGMPQTK.E<br>K.NMITGAAQMDGAILVSAADGMPQTK.E<br>K.NMITGAAQMDGAILVSAADGMPQTK.E<br>K.LLAPIAMPGLR.F<br>R.VLDGVAVAFDGVGVEPQSETVWR.Q<br>R.LLGATPAVLYPIGAESDFK.G<br>R.VSTDHESGQTIK.G<br>R.GSGITFIDEIKGGNIPR.E<br>R.GSGITFIDEIK.G<br>K.GLVDLNER.A<br>R.LLGATPAVLYPIGAESDFKGLVDLNER.A<br>R.EDIEEAFAGDIVALAGLK.E<br>R.ATSDSAPLSMLAF.I<br>K.IMNDPFGSLTFAR.I<br>K.DESLGAEFFYEDIPADLADK.A<br>K.VEVVTFPEEFMGDVGDLNSR.R<br>K.VEANVGAQVAVR.E<br>R.AQYTMQFSHYEEVPRNVAEEVK.A<br>R.EFKVEANVGAQVAVR.E<br>K.ADEGKPEHR.L<br>R.GNAQVVEAMVPLANMFYVYVQLR.S<br>R.ESLAKPVDDVYTHK.K<br>R.EAENGNHIGFIDIEFER.L<br>K.GVQPLLDVAVDYLPSPLDIPDVQGINPTTEQPDSR.A<br>R.MEFPPEVIELSVEPK.T<br>R.AIIWDESLGAEFFYEDIPADLADK.A<br>K.LVELAVEQDDEAMEAYLEGNVPDVALTKK.L<br>R.NFGIMAHIDAGK.T<br>K.IGEVHDGAATMDWMEQEQR.G<br>R.VKVSVAPER.G<br>R.LNIIDTPGHVDFDTEVER.S<br>K.NKGVQLLDVAVDYLPSPLDIPDVQGINPTTEQPDSR.A<br>R.MLLMHANSREIEEAFAGDIVALAGLK.E |
| YP_617855 | Sala_2817 | ribosomal protein L4/L1e         | 72.60%            | 18                      | K.AGADIDLNDVFLGDAR.A<br>R.VVAWQLEK.R<br>R.RAPFIGGGK.A<br>K.LLVDTLELDAK.T<br>K.LVVDITLLEK.D<br>R.APIFIGGGK.A<br>K.IKVQLDGGK.A<br>R.VVAWQLEK.R<br>R.AAVEKLEAR.C<br>R.TFGHSLNKK.I<br>R.TFGHSLNK.K<br>R.ERSDVAR.T<br>R.ALFDIDGDAVHESFAMASANLIGVDALPAIGANVYDIVR.A<br>R.ADTLVLTR.A<br>K.VQTLDDGK.A<br>K.LLGLDLGK.R<br>K.MALSDKAK.G<br>K.LDLGKR.A<br>R.DGVVAVQLGAGTAK.A<br>R.TQQNLEIVR.T<br>R.ATHGVSHISH.A<br>K.SAANTITAPADAPVETPAEEAVVDTAATDGAQES.<br>R.NRTQQNLEIVR.T<br>R.VADDATLDVGAELSADHFVAGQVMDIQGVTVQK.G<br>R.HPEAPYPASIK.S<br>R.GAYKAEVEPK.A<br>K.GGWLVR.D<br>R.TQQNLEIVRDAER.G<br>R.HVPPVTVLSLEGCCQVSVR.D<br>R.DAVKLP.R<br>K.MAGHMGAR.N<br>R.AHGSTGNR.Q<br>K.AEVEPK.A<br>R.VLDQATTDIADTAR.R<br>R.LLDIVQPTQTVDALMK.L<br>R.VLDQATTDIADTARR.T<br>K.SREQFEVR.T<br>K.FTVNRGPHIDK.K<br>K.AFDHRVLDQATTDIADTAR.R<br>R.TVGAQVAVYTK.<br>K.LLDQQAQAGDNIGALIR.G<br>K.VLAENVAGNAADFANIDKAPPEER.E<br>K.VGEEVEIVGKDKT.K<br>R.GITISTAHVEYETESR.H<br>K.LLAPIAMPGLR.F<br>R.GVGREVEER.G<br>R.DDNIGKAILK.L<br>K.VGEEVEIVGK.D<br>R.GQVLAKPGSITPHTFTSEVYVLSK.D<br>K.TVTVGVEMFR.K<br>K.QVGVPTMVVFLNK.V<br>K.KTVTVGVEMFR.K<br>R.KLLDQQAQAGDNIGALIR.G<br>K.VDQLDDPELLELVELEIR.E<br>K.PGSITPHTFTSEVYVLSK.D<br>R.TTDVTEVILPEGTEMMPGDNVQLSVK.L<br>K.VLAENVAGNAADFANIDK.A<br>K.VDQLDDPELLELVELEIRELSK.R<br>K.TVTVGVEMFR.K<br>K.PGSITPHTFTSEVYVLSKDEGGR.H<br>K.EHILLAK.Q<br>R.HTPFFANRPQFYFR.T<br>R.ERGITISTAHVEYETESR.H<br>K.NMITGAAQMDGAILVSAADGMPQTK.E<br>K.TSLTAATK.V<br>K.QVGVPTMVVFLNKVDQLDDPELLELVELEIR.E<br>R.GTVTVGRVETGVVK.V<br>K.PFLMPIEDVFSISGR.G<br>R.PLDKPFMPIEDVFSISGR.G<br>R.HYAHVDCPHADYK.N<br>R.GQVLAKPGSITPHTFTSEVYVLSKDEGGR.H<br>K.VLAENVAGNAADFANIDKAPPEERER.G<br>K.VGEEVEIVGKDKT.K<br>K.TVTVGVEMFR.L<br>K.TVTVGVEMFR.K<br>K.NMITGAAQMDGAILVSAADGMPQTK.E<br>K.LLMAAVDIEWPQPERPLDK.P<br>K.KTVTVGVEMFR.L<br>R.VETGVVKVEEVEIVGK.D<br>R.VETGVVK.V<br>R.TKPHCNIGTIGHVDHGK.T<br>R.HTPFFANR.P<br>K.QVGVPTMVVFLNK.V<br>K.NMITGAAQMDGAILVSAADGMPQTK.E<br>K.NMITGAAQMDGAILVSAADGMPQTK.E<br>K.NMITGAAQMDGAILVSAADGMPQTK.E<br>K.NMITGAAQMDGAILVSAADGMPQTK.E<br>K.NMITGAAQMDGAILVSAADGMPQTK.E<br>K.LLAPIAMPGLR.F<br>R.VLDGVAVAFDGVGVEPQSETVWR.Q<br>R.LLGATPAVLYPIGAESDFK.G<br>R.VSTDHESGQTIK.G<br>R.GSGITFIDEIKGGNIPR.E<br>R.GSGITFIDEIK.G<br>K.GLVDLNER.A<br>R.LLGATPAVLYPIGAESDFKGLVDLNER.A<br>R.EDIEEAFAGDIVALAGLK.E<br>R.ATSDSAPLSMLAF.I<br>K.IMNDPFGSLTFAR.I<br>K.DESLGAEFFYEDIPADLADK.A<br>K.VEVVTFPEEFMGDVGDLNSR.R<br>K.VEANVGAQVAVR.E<br>R.AQYTMQFSHYEEVPRNVAEEVK.A<br>R.EFKVEANVGAQVAVR.E<br>K.ADEGKPEHR.L<br>R.GNAQVVEAMVPLANMFYVYVQLR.S<br>R.ESLAKPVDDVYTHK.K<br>R.EAENGNHIGFIDIEFER.L<br>K.GVQPLLDVAVDYLPSPLDIPDVQGINPTTEQPDSR.A<br>R.MEFPPEVIELSVEPK.T<br>R.AIIWDESLGAEFFYEDIPADLADK.A<br>K.LVELAVEQDDEAMEAYLEGNVPDVALTKK.L<br>R.NFGIMAHIDAGK.T<br>K.IGEVHDGAATMDWMEQEQR.G<br>R.VKVSVAPER.G<br>R.LNIIDTPGHVDFDTEVER.S<br>K.NKGVQLLDVAVDYLPSPLDIPDVQGINPTTEQPDSR.A<br>R.MLLMHANSREIEEAFAGDIVALAGLK.E                                                                                                                                                                                                                                                                                                                                                                                                                                                    |
| YP_617856 | Sala_2818 | ribosomal protein L3             | 72.37%            | 15                      | K.AGADIDLNDVFLGDAR.A<br>R.VVAWQLEK.R<br>R.RAPFIGGGK.A<br>K.LLVDTLELDAK.T<br>K.LVVDITLLEK.D<br>R.APIFIGGGK.A<br>K.IKVQLDGGK.A<br>R.VVAWQLEK.R<br>R.AAVEKLEAR.C<br>R.TFGHSLNKK.I<br>R.TFGHSLNK.K<br>R.ERSDVAR.T<br>R.ALFDIDGDAVHESFAMASANLIGVDALPAIGANVYDIVR.A<br>R.ADTLVLTR.A<br>K.VQTLDDGK.A<br>K.LLGLDLGK.R<br>K.MALSDKAK.G<br>K.LDLGKR.A<br>R.DGVVAVQLGAGTAK.A<br>R.TQQNLEIVR.T<br>R.ATHGVSHISH.A<br>K.SAANTITAPADAPVETPAEEAVVDTAATDGAQES.<br>R.NRTQQNLEIVR.T<br>R.VADDATLDVGAELSADHFVAGQVMDIQGVTVQK.G<br>R.HPEAPYPASIK.S<br>R.GAYKAEVEPK.A<br>K.GGWLVR.D<br>R.TQQNLEIVRDAER.G<br>R.HVPPVTVLSLEGCCQVSVR.D<br>R.DAVKLP.R<br>K.MAGHMGAR.N<br>R.AHGSTGNR.Q<br>K.AEVEPK.A<br>R.VLDQATTDIADTAR.R<br>R.LLDIVQPTQTVDALMK.L<br>R.VLDQATTDIADTARR.T<br>K.SREQFEVR.T<br>K.FTVNRGPHIDK.K<br>K.AFDHRVLDQATTDIADTAR.R<br>R.TVGAQVAVYTK.<br>K.LLDQQAQAGDNIGALIR.G<br>K.VLAENVAGNAADFANIDKAPPEER.E<br>K.VGEEVEIVGKDKT.K<br>R.GITISTAHVEYETESR.H<br>K.LLAPIAMPGLR.F<br>R.GVGREVEER.G<br>R.DDNIGKAILK.L<br>K.VGEEVEIVGK.D<br>R.GQVLAKPGSITPHTFTSEVYVLSK.D<br>K.TVTVGVEMFR.K<br>K.QVGVPTMVVFLNK.V<br>K.KTVTVGVEMFR.K<br>R.KLLDQQAQAGDNIGALIR.G<br>K.VDQLDDPELLELVELEIR.E<br>K.PGSITPHTFTSEVYVLSK.D<br>R.TTDVTEVILPEGTEMMPGDNVQLSVK.L<br>K.VLAENVAGNAADFANIDK.A<br>K.VDQLDDPELLELVELEIRELSK.R<br>K.TVTVGVEMFR.K<br>K.PGSITPHTFTSEVYVLSKDEGGR.H<br>K.EHILLAK.Q<br>R.HTPFFANRPQFYFR.T<br>R.ERGITISTAHVEYETESR.H<br>K.NMITGAAQMDGAILVSAADGMPQTK.E<br>K.TSLTAATK.V<br>K.QVGVPTMVVFLNKVDQLDDPELLELVELEIR.E<br>R.GTVTVGRVETGVVK.V<br>K.PFLMPIEDVFSISGR.G<br>R.PLDKPFMPIEDVFSISGR.G<br>R.HYAHVDCPHADYK.N<br>R.GQVLAKPGSITPHTFTSEVYVLSKDEGGR.H<br>K.VLAENVAGNAADFANIDKAPPEERER.G<br>K.VGEEVEIVGKDKT.K<br>K.TVTVGVEMFR.L<br>K.TVTVGVEMFR.K<br>K.NMITGAAQMDGAILVSAADGMPQTK.E<br>K.LLMAAVDIEWPQPERPLDK.P<br>K.KTVTVGVEMFR.L<br>R.VETGVVKVEEVEIVGK.D<br>R.VETGVVK.V<br>R.TKPHCNIGTIGHVDHGK.T<br>R.HTPFFANR.P<br>K.QVGVPTMVVFLNK.V<br>K.NMITGAAQMDGAILVSAADGMPQTK.E<br>K.NMITGAAQMDGAILVSAADGMPQTK.E<br>K.NMITGAAQMDGAILVSAADGMPQTK.E<br>K.NMITGAAQMDGAILVSAADGMPQTK.E<br>K.NMITGAAQMDGAILVSAADGMPQTK.E<br>K.LLAPIAMPGLR.F<br>R.VLDGVAVAFDGVGVEPQSETVWR.Q<br>R.LLGATPAVLYPIGAESDFK.G<br>R.VSTDHESGQTIK.G<br>R.GSGITFIDEIKGGNIPR.E<br>R.GSGITFIDEIK.G<br>K.GLVDLNER.A<br>R.LLGATPAVLYPIGAESDFKGLVDLNER.A<br>R.EDIEEAFAGDIVALAGLK.E<br>R.ATSDSAPLSMLAF.I<br>K.IMNDPFGSLTFAR.I<br>K.DESLGAEFFYEDIPADLADK.A<br>K.VEVVTFPEEFMGDVGDLNSR.R<br>K.VEANVGAQVAVR.E<br>R.AQYTMQFSHYEEVPRNVAEEVK.A<br>R.EFKVEANVGAQVAVR.E<br>K.ADEGKPEHR.L<br>R.GNAQVVEAMVPLANMFYVYVQLR.S<br>R.ESLAKPVDDVYTHK.K<br>R.EAENGNHIGFIDIEFER.L<br>K.GVQPLLDVAVDYLPSPLDIPDVQGINPTTEQPDSR.A<br>R.MEFPPEVIELSVEPK.T<br>R.AIIWDESLGAEFFYEDIPADLADK.A<br>K.LVELAVEQDDEAMEAYLEGNVPDVALTKK.L<br>R.NFGIMAHIDAGK.T<br>K.IGEVHDGAATMDWMEQEQR.G<br>R.VKVSVAPER.G<br>R.LNIIDTPGHVDFDTEVER.S<br>K.NKGVQLLDVAVDYLPSPLDIPDVQGINPTTEQPDSR.A<br>R.MLLMHANSREIEEAFAGDIVALAGLK.E                                                                                                                                                                                                                                                                                                                                                                                                                                                    |
| YP_617857 | Sala_2819 | ribosomal protein S10            | 67.96%            | 6                       | K.AEVEPK.A<br>R.VLDQATTDIADTAR.R<br>R.LLDIVQPTQTVDALMK.L<br>R.VLDQATTDIADTARR.T<br>K.SREQFEVR.T<br>K.FTVNRGPHIDK.K<br>K.AFDHRVLDQATTDIADTAR.R<br>R.TVGAQVAVYTK.<br>K.LLDQQAQAGDNIGALIR.G<br>K.VLAENVAGNAADFANIDKAPPEER.E<br>K.VGEEVEIVGKDKT.K<br>R.GITISTAHVEYETESR.H<br>K.LLAPIAMPGLR.F<br>R.GVGREVEER.G<br>R.DDNIGKAILK.L<br>K.VGEEVEIVGK.D<br>R.GQVLAKPGSITPHTFTSEVYVLSK.D<br>K.TVTVGVEMFR.K<br>K.QVGVPTMVVFLNK.V<br>K.KTVTVGVEMFR.K<br>R.KLLDQQAQAGDNIGALIR.G<br>K.VDQLDDPELLELVELEIR.E<br>K.PGSITPHTFTSEVYVLSK.D<br>R.TTDVTEVILPEGTEMMPGDNVQLSVK.L<br>K.VLAENVAGNAADFANIDK.A<br>K.VDQLDDPELLELVELEIRELSK.R<br>K.TVTVGVEMFR.K<br>K.PGSITPHTFTSEVYVLSKDEGGR.H<br>K.EHILLAK.Q<br>R.HTPFFANRPQFYFR.T<br>R.ERGITISTAHVEYETESR.H<br>K.NMITGAAQMDGAILVSAADGMPQTK.E<br>K.TSLTAATK.V<br>K.QVGVPTMVVFLNKVDQLDDPELLELVELEIR.E<br>R.GTVTVGRVETGVVK.V<br>K.PFLMPIEDVFSISGR.G<br>R.PLDKPFMPIEDVFSISGR.G<br>R.HYAHVDCPHADYK.N<br>R.GQVLAKPGSITPHTFTSEVYVLSKDEGGR.H<br>K.VLAENVAGNAADFANIDKAPPEERER.G<br>K.VGEEVEIVGKDKT.K<br>K.TVTVGVEMFR.L<br>K.TVTVGVEMFR.K<br>K.NMITGAAQMDGAILVSAADGMPQTK.E<br>K.LLMAAVDIEWPQPERPLDK.P<br>K.KTVTVGVEMFR.L<br>R.VETGVVKVEEVEIVGK.D<br>R.VETGVVK.V<br>R.TKPHCNIGTIGHVDHGK.T<br>R.HTPFFANR.P<br>K.QVGVPTMVVFLNK.V<br>K.NMITGAAQMDGAILVSAADGMPQTK.E<br>K.NMITGAAQMDGAILVSAADGMPQTK.E<br>K.NMITGAAQMDGAILVSAADGMPQTK.E<br>K.NMITGAAQMDGAILVSAADGMPQTK.E<br>K.NMITGAAQMDGAILVSAADGMPQTK.E<br>K.LLAPIAMPGLR.F<br>R.VLDGVAVAFDGVGVEPQSETVWR.Q<br>R.LLGATPAVLYPIGAESDFK.G<br>R.VSTDHESGQTIK.G<br>R.GSGITFIDEIKGGNIPR.E<br>R.GSGITFIDEIK.G<br>K.GLVDLNER.A<br>R.LLGATPAVLYPIGAESDFKGLVDLNER.A<br>R.EDIEEAFAGDIVALAGLK.E<br>R.ATSDSAPLSMLAF.I<br>K.IMNDPFGSLTFAR.I<br>K.DESLGAEFFYEDIPADLADK.A<br>K.VEVVTFPEEFMGDVGDLNSR.R<br>K.VEANVGAQVAVR.E<br>R.AQYTMQFSHYEEVPRNVAEEVK.A<br>R.EFKVEANVGAQVAVR.E<br>K.ADEGKPEHR.L<br>R.GNAQVVEAMVPLANMFYVYVQLR.S<br>R.ESLAKPVDDVYTHK.K<br>R.EAENGNHIGFIDIEFER.L<br>K.GVQPLLDVAVDYLPSPLDIPDVQGINPTTEQPDSR.A<br>R.MEFPPEVIELSVEPK.T<br>R.AIIWDESLGAEFFYEDIPADLADK.A<br>K.LVELAVEQDDEAMEAYLEGNVPDVALTKK.L<br>R.NFGIMAHIDAGK.T<br>K.IGEVHDGAATMDWMEQEQR.G<br>R.VKVSVAPER.G<br>R.LNIIDTPGHVDFDTEVER.S<br>K.NKGVQLLDVAVDYLPSPLDIPDVQGINPTTEQPDSR.A<br>R.MLLMHANSREIEEAFAGDIVALAGLK.E                                                                                                                                                                                                                                                                                                                                                                                                                                                                                                                                                                                                                                                                                                                                                                                                                                                                                                                                                                                                                                                                                                                 |
| YP_617858 | Sala_2820 | translation elongation factor Tu | 100.00%           | 50                      | K.AEVEPK.A<br>R.VLDQATTDIADTAR.R<br>R.LLDIVQPTQTVDALMK.L<br>R.VLDQATTDIADTARR.T<br>K.SREQFEVR.T<br>K.FTVNRGPHIDK.K<br>K.AFDHRVLDQATTDIADTAR.R<br>R.TVGAQVAVYTK.<br>K.LLDQQAQAGDNIGALIR.G<br>K.VLAENVAGNAADFANIDKAPPEER.E<br>K.VGEEVEIVGKDKT.K<br>R.GITISTAHVEYETESR.H<br>K.LLAPIAMPGLR.F<br>R.GVGREVEER.G<br>R.DDNIGKAILK.L<br>K.VGEEVEIVGK.D<br>R.GQVLAKPGSITPHTFTSEVYVLSK.D<br>K.TVTVGVEMFR.K<br>K.QVGVPTMVVFLNK.V<br>K.KTVTVGVEMFR.K<br>R.KLLDQQAQAGDNIGALIR.G<br>K.VDQLDDPELLELVELEIR.E<br>K.PGSITPHTFTSEVYVLSK.D<br>R.TTDVTEVILPEGTEMMPGDNVQLSVK.L<br>K.VLAENVAGNAADFANIDK.A<br>K.VDQLDDPELLELVELEIRELSK.R<br>K.TVTVGVEMFR.K<br>K.PGSITPHTFTSEVYVLSKDEGGR.H<br>K.EHILLAK.Q<br>R.HTPFFANRPQFYFR.T<br>R.ERGITISTAHVEYETESR.H<br>K.NMITGAAQMDGAILVSAADGMPQTK.E<br>K.TSLTAATK.V<br>K.QVGVPTMVVFLNKVDQLDDPELLELVELEIR.E<br>R.GTVTVGRVETGVVK.V<br>K.PFLMPIEDVFSISGR.G<br>R.PLDKPFMPIEDVFSISGR.G<br>R.HYAHVDCPHADYK.N<br>R.GQVLAKPGSITPHTFTSEVYVLSKDEGGR.H<br>K.VLAENVAGNAADFANIDKAPPEERER.G<br>K.VGEEVEIVGKDKT.K<br>K.TVTVGVEMFR.L<br>K.TVTVGVEMFR.K<br>K.NMITGAAQMDGAILVSAADGMPQTK.E<br>K.LLMAAVDIEWPQPERPLDK.P<br>K.KTVTVGVEMFR.L<br>R.VETGVVKVEEVEIVGK.D<br>R.VETGVVK.V<br>R.TKPHCNIGTIGHVDHGK.T<br>R.HTPFFANR.P<br>K.QVGVPTMVVFLNK.V<br>K.NMITGAAQMDGAILVSAADGMPQTK.E<br>K.NMITGAAQMDGAILVSAADGMPQTK.E<br>K.NMITGAAQMDGAILVSAADGMPQTK.E<br>K.NMITGAAQMDGAILVSAADGMPQTK.E<br>K.NMITGAAQMDGAILVSAADGMPQTK.E<br>K.LLAPIAMPGLR.F<br>R.VLDGVAVAFDGVGVEPQSETVWR.Q<br>R.LLGATPAVLYPIGAESDFK.G<br>R.VSTDHESGQTIK.G<br>R.GSGITFIDEIKGGNIPR.E<br>R.GSGITFIDEIK.G<br>K.GLVDLNER.A<br>R.LLGATPAVLYPIGAESDFKGLVDLNER.A<br>R.EDIEEAFAGDIVALAGLK.E<br>R.ATSDSAPLSMLAF.I<br>K.IMNDPFGSLTFAR.I<br>K.DESLGAEFFYEDIPADLADK.A<br>K.VEVVTFPEEFMGDVGDLNSR.R<br>K.VEANVGAQVAVR.E<br>R.AQYTMQFSHYEEVPRNVAEEVK.A<br>R.EFKVEANVGAQVAVR.E<br>K.ADEGKPEHR.L<br>R.GNAQVVEAMVPLANMFYVYVQLR.S<br>R.ESLAKPVDDVYTHK.K<br>R.EAENGNHIGFIDIEFER.L<br>K.GVQPLLDVAVDYLPSPLDIPDVQGINPTTEQPDSR.A<br>R.MEFPPEVIELSVEPK.T<br>R.AIIWDESLGAEFFYEDIPADLADK.A<br>K.LVELAVEQDDEAMEAYLEGNVPDVALTKK.L<br>R.NFGIMAHIDAGK.T<br>K.IGEVHDGAATMDWMEQEQR.G<br>R.VKVSVAPER.G<br>R.LNIIDTPGHVDFDTEVER.S<br>K.NKGVQLLDVAVDYLPSPLDIPDVQGINPTTEQPDSR.A<br>R.MLLMHANSREIEEAFAGDIVALAGLK.E                                                                                                                                                                                                                                                                                                                                                                                                                                                                                                                                                                                                                                                                                                                                                                                                                                                                                                                                                                                                                                                                                                                 |
| YP_617859 | Sala_2821 | translation elongation factor G  | 89.96%            | 73                      | K.AEVEPK.A<br>R.VLDQATTDIADTAR.R<br>R.LLDIVQPTQTVDALMK.L<br>R.VLDQATTDIADTARR.T<br>K.SREQFEVR.T<br>K.FTVNRGPHIDK.K<br>K.AFDHRVLDQATTDIADTAR.R<br>R.TVGAQVAVYTK.<br>K.LLDQQAQAGDNIGALIR.G<br>K.VLAENVAGNAADFANIDKAPPEER.E<br>K.VGEEVEIVGKDKT.K<br>R.GITISTAHVEYETESR.H<br>K.LLAPIAMPGLR.F<br>R.GVGREVEER.G<br>R.DDNIGKAILK.L<br>K.VGEEVEIVGK.D<br>R.GQVLAKPGSITPHTFTSEVYVLSK.D<br>K.TVTVGVEMFR.K<br>K.QVGVPTMVVFLNK.V<br>K.KTVTVGVEMFR.K<br>R.KLLDQQAQAGDNIGALIR.G<br>K.VDQLDDPELLELVELEIR.E<br>K.PGSITPHTFTSEVYVLSK.D<br>R.TTDVTEVILPEGTEMMPGDNVQLSVK.L<br>K.VLAENVAGNAADFANIDK.A<br>K.VDQLDDPELLELVELEIRELSK.R<br>K.TVTVGVEMFR.K<br>K.PGSITPHTFTSEVYVLSKDEGGR.H<br>K.EHILLAK.Q<br>R.HTPFFANRPQFYFR.T<br>R.ERGITISTAHVEYETESR.H<br>K.NMITGAAQMDGAILVSAADGMPQTK.E<br>K.TSLTAATK.V<br>K.QVGVPTMVVFLNKVDQLDDPELLELVELEIR.E<br>R.GTVTVGRVETGVVK.V<br>K.PFLMPIEDVFSISGR.G<br>R.PLDKPFMPIEDVFSISGR.G<br>R.HYAHVDCPHADYK.N<br>R.GQVLAKPGSITPHTFTSEVYVLSKDEGGR.H<br>K.VLAENVAGNAADFANIDKAPPEERER.G<br>K.VGEEVEIVGKDKT.K<br>K.TVTVGVEMFR.L<br>K.TVTVGVEMFR.K<br>K.NMITGAAQMDGAILVSAADGMPQTK.E<br>K.LLMAAVDIEWPQPERPLDK.P<br>K.KTVTVGVEMFR.L<br>R.VETGVVKVEEVEIVGK.D<br>R.VETGVVK.V<br>R.TKPHCNIGTIGHVDHGK.T<br>R.HTPFFANR.P<br>K.QVGVPTMVVFLNK.V<br>K.NMITGAAQMDGAILVSAADGMPQTK.E<br>K.NMITGAAQMDGAILVSAADGMPQTK.E<br>K.NMITGAAQMDGAILVSAADGMPQTK.E<br>K.NMITGAAQMDGAILVSAADGMPQTK.E<br>K.NMITGAAQMDGAILVSAADGMPQTK.E<br>K.LLAPIAMPGLR.F<br>R.VLDGVAVAFDGVGVEPQSETVWR.Q<br>R.LLGATPAVLYPIGAESDFK.G<br>R.VSTDHESGQTIK.G<br>R.GSGITFIDEIKGGNIPR.E<br>R.GSGITFIDEIK.G<br>K.GLVDLNER.A<br>R.LLGATPAVLYPIGAESDFKGLVDLNER.A<br>R.EDIEEAFAGDIVALAGLK.E<br>R.ATSDSAPLSMLAF.I<br>K.IMNDPFGSLTFAR.I<br>K.DESLGAEFFYEDIPADLADK.A<br>K.VEVVTFPEEFMGDVGDLNSR.R<br>K.VEANVGAQVAVR.E<br>R.AQYTMQFSHYEEVPRNVAEEVK.A<br>R.EFKVEANVGAQVAVR.E<br>K.ADEGKPEHR.L<br>R.GNAQVVEAMVPLANMFYVYVQLR.S<br>R.ESLAKPVDDVYTHK.K<br>R.EAENGNHIGFIDIEFER.L<br>K.GVQPLLDVAVDYLPSPLDIPDVQGINPTTEQPDSR.A<br>R.MEFPPEVIELSVEPK.T<br>R.AIIWDESLGAEFFYEDIPADLADK.A<br>K.LVELAVEQDDEAMEAYLEGNVPDVALTKK.L<br>R.NFGIMAHIDAGK.T<br>K.IGEVHDGAATMDWMEQEQR.G<br>R.VKVSVAPER.G<br>R.LNIIDTPGHVDFDTEVER.S<br>K.NKGVQLLDVAVDYLPSPLDIPDVQGINPTTEQPDSR.A<br>R.MLLMHANSREIEEAFAGDIVALAGLK.E                                                                                                                                                                                                                                                                                                                                                                                                                                                                                                                                                                                                                                                                                                                                                                                                                                                                                                                                                                                                                                                                                                                 |

| Accession | Locus tag | Description                                                        | Sequence coverage | No. peptides identified | List of peptides identified                                                                                                                                                                                                                                                                                                                                                                                                                                                                                                                                                                                                                                                                                                                                                                                                                                                                                                                                                                                                                                                                                                                                                                                                                                                                                                                                                                                                                                                                                                                                                                                                                                                                                                                                                                                                                                                                                                                                                                                                                                                                                                                                                                                                                                                                                                                                                                                                                                                                                                                                                                                                                                                                                                                                                                                                                                                                                                                                                                                                                                                                                                                                                                                                                                                              |
|-----------|-----------|--------------------------------------------------------------------|-------------------|-------------------------|------------------------------------------------------------------------------------------------------------------------------------------------------------------------------------------------------------------------------------------------------------------------------------------------------------------------------------------------------------------------------------------------------------------------------------------------------------------------------------------------------------------------------------------------------------------------------------------------------------------------------------------------------------------------------------------------------------------------------------------------------------------------------------------------------------------------------------------------------------------------------------------------------------------------------------------------------------------------------------------------------------------------------------------------------------------------------------------------------------------------------------------------------------------------------------------------------------------------------------------------------------------------------------------------------------------------------------------------------------------------------------------------------------------------------------------------------------------------------------------------------------------------------------------------------------------------------------------------------------------------------------------------------------------------------------------------------------------------------------------------------------------------------------------------------------------------------------------------------------------------------------------------------------------------------------------------------------------------------------------------------------------------------------------------------------------------------------------------------------------------------------------------------------------------------------------------------------------------------------------------------------------------------------------------------------------------------------------------------------------------------------------------------------------------------------------------------------------------------------------------------------------------------------------------------------------------------------------------------------------------------------------------------------------------------------------------------------------------------------------------------------------------------------------------------------------------------------------------------------------------------------------------------------------------------------------------------------------------------------------------------------------------------------------------------------------------------------------------------------------------------------------------------------------------------------------------------------------------------------------------------------------------------------------|
| YP_617860 | Sala_2822 | ribosomal protein S7                                               | 73.72%            | 14                      | K.LVELAVEQDDEAMEAYLEGNVPDVLTK.K<br>R.LAAEDPSFR.V<br>K.DESLGAFFYEDIPADLADKAAEYR.E<br>K.GMGEHLIDLVDLR.M<br>R.RGQIQGTDLSR.G<br>K.KQSGGSGQFGR.V<br>R.MLLMHANSR.E<br>R.EYIPSVKEK.G<br>R.EKLVELAVEQDDEAMEAYLEGNVPDVLTK.K<br>K.GSVLNSVK.D<br>R.TGANFYCYQTIIDR.LL<br>R.MEFPEPVIELSVPEK.T<br>R.MCFINKLDR.T<br>R.KGTLNQAFVPLCGSAFK.N<br>R.IVSGTLTK.G<br>R.GQIQGTDLSR.G<br>R.GNAQVVEAMVPLANMFGVYNQLR.S<br>R.GNAQVVEAMVPLANMFGVYNQLR.S<br>R.GNAQVVEAMVPLANMFGVYNQLR.S<br>R.GITITSAATTCLWK.A<br>R.ESLAKPVDVYTHKK.Q<br>R.EAENGHMIGFFIIDFEIR.L<br>R.ATSDSAPLSMLAFK.I<br>R.AQYTMQFSHYEEVFNNAVEEVK.A<br>R.AIIWKDESLGAFFYEDIPADLADKAAEYR.E<br>K.VSVAPGER.G<br>K.QSGGSGQFGR.V<br>K.PVDVYTHKK.Q<br>K.LLEPVMKVEVVTPEEFMGDVIQDLNSR.R<br>K.IMNDFVGSILFAR.I<br>K.IGEVHDGAATMDWMEQEQR.G<br>K.IGEVHDGAATMDWMEQEQR.G<br>K.GTLNQAFVPLCGSAFK.N<br>K.ETTTGDTLCSANPILIR.M<br>K.AAEYREK.LL<br>R.SHPLE.R.Y<br>R.NFGIMAHIDAGK.T<br>R.MLLMHANSREIEAFAGDIVALAGK.E<br>R.MCFINKLDR.T<br>R.AQYTMQFSHYEEVFNNAVEEVKAK.M<br>K.IVEVVTPEEFMGDVIQDLNSR.R<br>K.LVELAVEQDDEAMEAYLEGNVPDVLTK.K.L<br>K.LLEPVMKVEVVTPEEFMGDVIQDLNSR.R<br>K.GMGEHLIDLVDLR.M<br>K.SVAESIVYGALEAVEAR.A<br>R.VGGATYQVPEVRPDR.A<br>R.LSGELLDASNNR.G<br>R.LSGELLDASNNRGNVAVK.K<br>R.FGOVLSK.F<br>K.KSVAESIVYGALEAVEAR.A<br>R.NRSETTMAAR.L<br>K.EPLGVFHEALANIRPNIEVR.S<br>R.RVGGATYQVPEVRPDR.A<br>R.EIILPDR.F<br>R.AQALAIR.W<br>K.FMNSVMLDGKK.S<br>K.FMNSVMLDGKK.S<br>K.FMNSVMLDGK.K<br>R.GVLDIQGVKDR.K<br>R.EVITYIPGEGHNLQEHVSLIR.G<br>K.KPNSALR.K<br>R.VYTTTPK.K<br>R.LTNAREVITYIPGEGHNLQEHVSLIR.G<br>K.VPAMDANPQK.R<br>K.SKVPAMDANPQK.R<br>R.AAIDALLAGQAVLAK.G<br>R.DRITAEQDAAYR.A<br>K.GGSALDAVQAAVELMEDDPLFNAGR.G<br>R.ITAEQDAAYR.A<br>R.DTHGNLAAATSTGGLTGR.W<br>R.DTHGNLAAATSTGGLTGR.R<br>R.LGDAPIVGAETVADR.A<br>R.TDRAEVATSSGGWLVHGGAGTIR.R<br>K.GGSALDAVQAAVELMEDDPLFNAGR.G<br>R.TNELDAAIMDGR.T<br>R.GVEQMDPAWFATSHR.R<br>K.AATVNAADLLGLADQJGSIAPGK.S<br>R.LLANDAYEPVLAKE.I<br>R.LALAAGADSIHGTILDEATIAQWAK.S<br>R.GAATIIVEGK.I<br>R.TVIHAGHLLAEPGPAR.G<br>R.NLGDGDGATLALR.D<br>K.SADIIAVASDPLADVR.V<br>K.VAVPHAGADGIR.L<br>K.QMFDEAQAIVDTAHLFGK.K<br>K.FASTGGVNSR.I<br>K.TYYVPTLSTVNGYK.E<br>K.SLEQLVPR.G<br>R.NGDEFELMWQHGMPTLEALK.A<br>K.IAFGTDCGVSK.H<br>R.LLGDVAIEAR.R<br>R.LVFTNADADYAAR.V<br>K.LFDLIDER.M<br>R.YTPKPEATAYDVMVAHLGVDPVR.S<br>R.GIADLFDGICDIR.I<br>R.DVHAILDR.L<br>R.RLVFTNADADYAAR.V<br>R.EAVDTAIALDDGSFR.V<br>R.DTLGLATTAVR.E<br>R.GTWQVNWQLK.K<br>R.AEVAEGVIVR.E<br>R.LNDMEIIEGGADGATWWDKVPK.F<br>K.RVDAQTR.A<br>K.FAGWGENR.F<br>K.TGINELLR.D<br>K.KAVLLSFR.L<br>R.LNDMEIIEGGADGATWWDK.V<br>R.LNDMEIIEGGADGATWWDKVPK.F<br>R.EGAVLSMGVYLGASTK.I<br>R.EGAVLSMGVYLGASTK.I<br>R.AKTGINELLR.D<br>K.TGINELLR.D<br>K.HLSGSDADITGLEIPTGQPIVYEINDLSAR.E<br>R.SFDIPPPPLEAGSQWDLSDAPR.Y<br>R.YAGIAIPSTESLKDITAR.V<br>R.VLPHYEAIAIAPQLAAGR.T<br>R.HYGGTLGLDKAETA.AK.H<br>R.HGQSQWNLENR.F<br>R.TVLISAHGNSLR.A<br>K.GAAEWAAGELMK.A<br>K.HGQEQVR.I<br>R.FTGWWDVVDVTEK.G<br>K.TLNLALEAMGR.L<br>R.RSFDIPPPPLEAGSQWDLSDAPR.Y<br>R.HYGGTLGLDK.A<br>R.FTGWWDVVDVTEKGAEEWAAGELMK.A<br>K.HLSGSDADITGLEIPTGQPIVYEINDLSARER.Y<br>K.GVARDICTSVQTR.A<br>R.KAPVAEGER.K<br>R.ADLADGLLITDLVR.E<br>R.LFDLLETGASSAENYPPFDIEK.I<br>K.IAIGSSAAPVIEDKK.A<br>R.RFQLADPVR.V<br>K.IAIGSSAAPVIEDK.K<br>R.VERADLADGLLITDLVR.E<br>K.SDEIDITAQNMILTVSGR.K<br>R.KLLYSGIATR.A |
| YP_617861 | Sala_2823 | ribosomal protein S12                                              | 52.03%            | 7                       | R.LSGELLDASNNR.G<br>R.LSGELLDASNNRGNVAVK.K<br>R.FGOVLSK.F<br>K.KSVAESIVYGALEAVEAR.A<br>R.NRSETTMAAR.L<br>K.EPLGVFHEALANIRPNIEVR.S<br>R.RVGGATYQVPEVRPDR.A<br>R.EIILPDR.F<br>R.AQALAIR.W<br>K.FMNSVMLDGKK.S<br>K.FMNSVMLDGKK.S<br>K.FMNSVMLDGK.K<br>R.GVLDIQGVKDR.K<br>R.EVITYIPGEGHNLQEHVSLIR.G<br>K.KPNSALR.K<br>R.VYTTTPK.K<br>R.LTNAREVITYIPGEGHNLQEHVSLIR.G<br>K.VPAMDANPQK.R<br>K.SKVPAMDANPQK.R<br>R.AAIDALLAGQAVLAK.G<br>R.DRITAEQDAAYR.A<br>K.GGSALDAVQAAVELMEDDPLFNAGR.G<br>R.ITAEQDAAYR.A<br>R.DTHGNLAAATSTGGLTGR.W<br>R.DTHGNLAAATSTGGLTGR.R<br>R.LGDAPIVGAETVADR.A<br>R.TDRAEVATSSGGWLVHGGAGTIR.R<br>K.GGSALDAVQAAVELMEDDPLFNAGR.G<br>R.TNELDAAIMDGR.T<br>R.GVEQMDPAWFATSHR.R<br>K.AATVNAADLLGLADQJGSIAPGK.S<br>R.LLANDAYEPVLAKE.I<br>R.LALAAGADSIHGTILDEATIAQWAK.S<br>R.GAATIIVEGK.I<br>R.TVIHAGHLLAEPGPAR.G<br>R.NLGDGDGATLALR.D<br>K.SADIIAVASDPLADVR.V<br>K.VAVPHAGADGIR.L<br>K.QMFDEAQAIVDTAHLFGK.K<br>K.FASTGGVNSR.I<br>K.TYYVPTLSTVNGYK.E<br>K.SLEQLVPR.G<br>R.NGDEFELMWQHGMPTLEALK.A<br>K.IAFGTDCGVSK.H<br>R.LLGDVAIEAR.R<br>R.LVFTNADADYAAR.V<br>K.LFDLIDER.M<br>R.YTPKPEATAYDVMVAHLGVDPVR.S<br>R.GIADLFDGICDIR.I<br>R.DVHAILDR.L<br>R.RLVFTNADADYAAR.V<br>R.EAVDTAIALDDGSFR.V<br>R.DTLGLATTAVR.E<br>R.GTWQVNWQLK.K<br>R.AEVAEGVIVR.E<br>R.LNDMEIIEGGADGATWWDKVPK.F<br>K.RVDAQTR.A<br>K.FAGWGENR.F<br>K.TGINELLR.D<br>K.KAVLLSFR.L<br>R.LNDMEIIEGGADGATWWDK.V<br>R.LNDMEIIEGGADGATWWDKVPK.F<br>R.EGAVLSMGVYLGASTK.I<br>R.EGAVLSMGVYLGASTK.I<br>R.AKTGINELLR.D<br>K.TGINELLR.D<br>K.HLSGSDADITGLEIPTGQPIVYEINDLSAR.E<br>R.SFDIPPPPLEAGSQWDLSDAPR.Y<br>R.YAGIAIPSTESLKDITAR.V<br>R.VLPHYEAIAIAPQLAAGR.T<br>R.HYGGTLGLDKAETA.AK.H<br>R.HGQSQWNLENR.F<br>R.TVLISAHGNSLR.A<br>K.GAAEWAAGELMK.A<br>K.HGQEQVR.I<br>R.FTGWWDVVDVTEK.G<br>K.TLNLALEAMGR.L<br>R.RSFDIPPPPLEAGSQWDLSDAPR.Y<br>R.HYGGTLGLDK.A<br>R.FTGWWDVVDVTEKGAEEWAAGELMK.A<br>K.HLSGSDADITGLEIPTGQPIVYEINDLSARER.Y<br>K.GVARDICTSVQTR.A<br>R.KAPVAEGER.K<br>R.ADLADGLLITDLVR.E<br>R.LFDLLETGASSAENYPPFDIEK.I<br>K.IAIGSSAAPVIEDKK.A<br>R.RFQLADPVR.V<br>K.IAIGSSAAPVIEDK.K<br>R.VERADLADGLLITDLVR.E<br>K.SDEIDITAQNMILTVSGR.K<br>R.KLLYSGIATR.A                                                                                                                                                                                                                                                                                                                                                                                                                                                                                                                                                                                                                                                                                                                                                                                                                                                                                                                                                                                                                                                                                                                                                             |
| YP_617862 | Sala_2824 | peptidase T2, asparaginase 2                                       | 39.66%            | 11                      | R.LSGELLDASNNR.G<br>R.LSGELLDASNNRGNVAVK.K<br>R.FGOVLSK.F<br>K.KSVAESIVYGALEAVEAR.A<br>R.NRSETTMAAR.L<br>K.EPLGVFHEALANIRPNIEVR.S<br>R.RVGGATYQVPEVRPDR.A<br>R.EIILPDR.F<br>R.AQALAIR.W<br>K.FMNSVMLDGKK.S<br>K.FMNSVMLDGKK.S<br>K.FMNSVMLDGK.K<br>R.GVLDIQGVKDR.K<br>R.EVITYIPGEGHNLQEHVSLIR.G<br>K.KPNSALR.K<br>R.VYTTTPK.K<br>R.LTNAREVITYIPGEGHNLQEHVSLIR.G<br>K.VPAMDANPQK.R<br>K.SKVPAMDANPQK.R<br>R.AAIDALLAGQAVLAK.G<br>R.DRITAEQDAAYR.A<br>K.GGSALDAVQAAVELMEDDPLFNAGR.G<br>R.ITAEQDAAYR.A<br>R.DTHGNLAAATSTGGLTGR.W<br>R.DTHGNLAAATSTGGLTGR.R<br>R.LGDAPIVGAETVADR.A<br>R.TDRAEVATSSGGWLVHGGAGTIR.R<br>K.GGSALDAVQAAVELMEDDPLFNAGR.G<br>R.TNELDAAIMDGR.T<br>R.GVEQMDPAWFATSHR.R<br>K.AATVNAADLLGLADQJGSIAPGK.S<br>R.LLANDAYEPVLAKE.I<br>R.LALAAGADSIHGTILDEATIAQWAK.S<br>R.GAATIIVEGK.I<br>R.TVIHAGHLLAEPGPAR.G<br>R.NLGDGDGATLALR.D<br>K.SADIIAVASDPLADVR.V<br>K.VAVPHAGADGIR.L<br>K.QMFDEAQAIVDTAHLFGK.K<br>K.FASTGGVNSR.I<br>K.TYYVPTLSTVNGYK.E<br>K.SLEQLVPR.G<br>R.NGDEFELMWQHGMPTLEALK.A<br>K.IAFGTDCGVSK.H<br>R.LLGDVAIEAR.R<br>R.LVFTNADADYAAR.V<br>K.LFDLIDER.M<br>R.YTPKPEATAYDVMVAHLGVDPVR.S<br>R.GIADLFDGICDIR.I<br>R.DVHAILDR.L<br>R.RLVFTNADADYAAR.V<br>R.EAVDTAIALDDGSFR.V<br>R.DTLGLATTAVR.E<br>R.GTWQVNWQLK.K<br>R.AEVAEGVIVR.E<br>R.LNDMEIIEGGADGATWWDKVPK.F<br>K.RVDAQTR.A<br>K.FAGWGENR.F<br>K.TGINELLR.D<br>K.KAVLLSFR.L<br>R.LNDMEIIEGGADGATWWDK.V<br>R.LNDMEIIEGGADGATWWDKVPK.F<br>R.EGAVLSMGVYLGASTK.I<br>R.EGAVLSMGVYLGASTK.I<br>R.AKTGINELLR.D<br>K.TGINELLR.D<br>K.HLSGSDADITGLEIPTGQPIVYEINDLSAR.E<br>R.SFDIPPPPLEAGSQWDLSDAPR.Y<br>R.YAGIAIPSTESLKDITAR.V<br>R.VLPHYEAIAIAPQLAAGR.T<br>R.HYGGTLGLDKAETA.AK.H<br>R.HGQSQWNLENR.F<br>R.TVLISAHGNSLR.A<br>K.GAAEWAAGELMK.A<br>K.HGQEQVR.I<br>R.FTGWWDVVDVTEK.G<br>K.TLNLALEAMGR.L<br>R.RSFDIPPPPLEAGSQWDLSDAPR.Y<br>R.HYGGTLGLDK.A<br>R.FTGWWDVVDVTEKGAEEWAAGELMK.A<br>K.HLSGSDADITGLEIPTGQPIVYEINDLSARER.Y<br>K.GVARDICTSVQTR.A<br>R.KAPVAEGER.K<br>R.ADLADGLLITDLVR.E<br>R.LFDLLETGASSAENYPPFDIEK.I<br>K.IAIGSSAAPVIEDKK.A<br>R.RFQLADPVR.V<br>K.IAIGSSAAPVIEDK.K<br>R.VERADLADGLLITDLVR.E<br>K.SDEIDITAQNMILTVSGR.K<br>R.KLLYSGIATR.A                                                                                                                                                                                                                                                                                                                                                                                                                                                                                                                                                                                                                                                                                                                                                                                                                                                                                                                                                                                                                                                                                                                                                             |
| YP_617863 | Sala_2825 | amidohydrolase                                                     | 49.65%            | 14                      | R.LSGELLDASNNR.G<br>R.LSGELLDASNNRGNVAVK.K<br>R.FGOVLSK.F<br>K.KSVAESIVYGALEAVEAR.A<br>R.NRSETTMAAR.L<br>K.EPLGVFHEALANIRPNIEVR.S<br>R.RVGGATYQVPEVRPDR.A<br>R.EIILPDR.F<br>R.AQALAIR.W<br>K.FMNSVMLDGKK.S<br>K.FMNSVMLDGKK.S<br>K.FMNSVMLDGK.K<br>R.GVLDIQGVKDR.K<br>R.EVITYIPGEGHNLQEHVSLIR.G<br>K.KPNSALR.K<br>R.VYTTTPK.K<br>R.LTNAREVITYIPGEGHNLQEHVSLIR.G<br>K.VPAMDANPQK.R<br>K.SKVPAMDANPQK.R<br>R.AAIDALLAGQAVLAK.G<br>R.DRITAEQDAAYR.A<br>K.GGSALDAVQAAVELMEDDPLFNAGR.G<br>R.ITAEQDAAYR.A<br>R.DTHGNLAAATSTGGLTGR.W<br>R.DTHGNLAAATSTGGLTGR.R<br>R.LGDAPIVGAETVADR.A<br>R.TDRAEVATSSGGWLVHGGAGTIR.R<br>K.GGSALDAVQAAVELMEDDPLFNAGR.G<br>R.TNELDAAIMDGR.T<br>R.GVEQMDPAWFATSHR.R<br>K.AATVNAADLLGLADQJGSIAPGK.S<br>R.LLANDAYEPVLAKE.I<br>R.LALAAGADSIHGTILDEATIAQWAK.S<br>R.GAATIIVEGK.I<br>R.TVIHAGHLLAEPGPAR.G<br>R.NLGDGDGATLALR.D<br>K.SADIIAVASDPLADVR.V<br>K.VAVPHAGADGIR.L<br>K.QMFDEAQAIVDTAHLFGK.K<br>K.FASTGGVNSR.I<br>K.TYYVPTLSTVNGYK.E<br>K.SLEQLVPR.G<br>R.NGDEFELMWQHGMPTLEALK.A<br>K.IAFGTDCGVSK.H<br>R.LLGDVAIEAR.R<br>R.LVFTNADADYAAR.V<br>K.LFDLIDER.M<br>R.YTPKPEATAYDVMVAHLGVDPVR.S<br>R.GIADLFDGICDIR.I<br>R.DVHAILDR.L<br>R.RLVFTNADADYAAR.V<br>R.EAVDTAIALDDGSFR.V<br>R.DTLGLATTAVR.E<br>R.GTWQVNWQLK.K<br>R.AEVAEGVIVR.E<br>R.LNDMEIIEGGADGATWWDKVPK.F<br>K.RVDAQTR.A<br>K.FAGWGENR.F<br>K.TGINELLR.D<br>K.KAVLLSFR.L<br>R.LNDMEIIEGGADGATWWDK.V<br>R.LNDMEIIEGGADGATWWDKVPK.F<br>R.EGAVLSMGVYLGASTK.I<br>R.EGAVLSMGVYLGASTK.I<br>R.AKTGINELLR.D<br>K.TGINELLR.D<br>K.HLSGSDADITGLEIPTGQPIVYEINDLSAR.E<br>R.SFDIPPPPLEAGSQWDLSDAPR.Y<br>R.YAGIAIPSTESLKDITAR.V<br>R.VLPHYEAIAIAPQLAAGR.T<br>R.HYGGTLGLDKAETA.AK.H<br>R.HGQSQWNLENR.F<br>R.TVLISAHGNSLR.A<br>K.GAAEWAAGELMK.A<br>K.HGQEQVR.I<br>R.FTGWWDVVDVTEK.G<br>K.TLNLALEAMGR.L<br>R.RSFDIPPPPLEAGSQWDLSDAPR.Y<br>R.HYGGTLGLDK.A<br>R.FTGWWDVVDVTEKGAEEWAAGELMK.A<br>K.HLSGSDADITGLEIPTGQPIVYEINDLSARER.Y<br>K.GVARDICTSVQTR.A<br>R.KAPVAEGER.K<br>R.ADLADGLLITDLVR.E<br>R.LFDLLETGASSAENYPPFDIEK.I<br>K.IAIGSSAAPVIEDKK.A<br>R.RFQLADPVR.V<br>K.IAIGSSAAPVIEDK.K<br>R.VERADLADGLLITDLVR.E<br>K.SDEIDITAQNMILTVSGR.K<br>R.KLLYSGIATR.A                                                                                                                                                                                                                                                                                                                                                                                                                                                                                                                                                                                                                                                                                                                                                                                                                                                                                                                                                                                                                                                                                                                                                             |
| YP_617864 | Sala_2827 | Pyrimidine 5-nucleotidase                                          | 32.49%            | 7                       | R.LSGELLDASNNR.G<br>R.LSGELLDASNNRGNVAVK.K<br>R.FGOVLSK.F<br>K.KSVAESIVYGALEAVEAR.A<br>R.NRSETTMAAR.L<br>K.EPLGVFHEALANIRPNIEVR.S<br>R.RVGGATYQVPEVRPDR.A<br>R.EIILPDR.F<br>R.AQALAIR.W<br>K.FMNSVMLDGKK.S<br>K.FMNSVMLDGKK.S<br>K.FMNSVMLDGK.K<br>R.GVLDIQGVKDR.K<br>R.EVITYIPGEGHNLQEHVSLIR.G<br>K.KPNSALR.K<br>R.VYTTTPK.K<br>R.LTNAREVITYIPGEGHNLQEHVSLIR.G<br>K.VPAMDANPQK.R<br>K.SKVPAMDANPQK.R<br>R.AAIDALLAGQAVLAK.G<br>R.DRITAEQDAAYR.A<br>K.GGSALDAVQAAVELMEDDPLFNAGR.G<br>R.ITAEQDAAYR.A<br>R.DTHGNLAAATSTGGLTGR.W<br>R.DTHGNLAAATSTGGLTGR.R<br>R.LGDAPIVGAETVADR.A<br>R.TDRAEVATSSGGWLVHGGAGTIR.R<br>K.GGSALDAVQAAVELMEDDPLFNAGR.G<br>R.TNELDAAIMDGR.T<br>R.GVEQMDPAWFATSHR.R<br>K.AATVNAADLLGLADQJGSIAPGK.S<br>R.LLANDAYEPVLAKE.I<br>R.LALAAGADSIHGTILDEATIAQWAK.S<br>R.GAATIIVEGK.I<br>R.TVIHAGHLLAEPGPAR.G<br>R.NLGDGDGATLALR.D<br>K.SADIIAVASDPLADVR.V<br>K.VAVPHAGADGIR.L<br>K.QMFDEAQAIVDTAHLFGK.K<br>K.FASTGGVNSR.I<br>K.TYYVPTLSTVNGYK.E<br>K.SLEQLVPR.G<br>R.NGDEFELMWQHGMPTLEALK.A<br>K.IAFGTDCGVSK.H<br>R.LLGDVAIEAR.R<br>R.LVFTNADADYAAR.V<br>K.LFDLIDER.M<br>R.YTPKPEATAYDVMVAHLGVDPVR.S<br>R.GIADLFDGICDIR.I<br>R.DVHAILDR.L<br>R.RLVFTNADADYAAR.V<br>R.EAVDTAIALDDGSFR.V<br>R.DTLGLATTAVR.E<br>R.GTWQVNWQLK.K<br>R.AEVAEGVIVR.E<br>R.LNDMEIIEGGADGATWWDKVPK.F<br>K.RVDAQTR.A<br>K.FAGWGENR.F<br>K.TGINELLR.D<br>K.KAVLLSFR.L<br>R.LNDMEIIEGGADGATWWDK.V<br>R.LNDMEIIEGGADGATWWDKVPK.F<br>R.EGAVLSMGVYLGASTK.I<br>R.EGAVLSMGVYLGASTK.I<br>R.AKTGINELLR.D<br>K.TGINELLR.D<br>K.HLSGSDADITGLEIPTGQPIVYEINDLSAR.E<br>R.SFDIPPPPLEAGSQWDLSDAPR.Y<br>R.YAGIAIPSTESLKDITAR.V<br>R.VLPHYEAIAIAPQLAAGR.T<br>R.HYGGTLGLDKAETA.AK.H<br>R.HGQSQWNLENR.F<br>R.TVLISAHGNSLR.A<br>K.GAAEWAAGELMK.A<br>K.HGQEQVR.I<br>R.FTGWWDVVDVTEK.G<br>K.TLNLALEAMGR.L<br>R.RSFDIPPPPLEAGSQWDLSDAPR.Y<br>R.HYGGTLGLDK.A<br>R.FTGWWDVVDVTEKGAEEWAAGELMK.A<br>K.HLSGSDADITGLEIPTGQPIVYEINDLSARER.Y<br>K.GVARDICTSVQTR.A<br>R.KAPVAEGER.K<br>R.ADLADGLLITDLVR.E<br>R.LFDLLETGASSAENYPPFDIEK.I<br>K.IAIGSSAAPVIEDKK.A<br>R.RFQLADPVR.V<br>K.IAIGSSAAPVIEDK.K<br>R.VERADLADGLLITDLVR.E<br>K.SDEIDITAQNMILTVSGR.K<br>R.KLLYSGIATR.A                                                                                                                                                                                                                                                                                                                                                                                                                                                                                                                                                                                                                                                                                                                                                                                                                                                                                                                                                                                                                                                                                                                                                             |
| YP_617866 | Sala_2828 | 2,3,4,5-tetrahydropyridine-2,6-dicarboxylate N-succinyltransferase | 43.21%            | 15                      | R.LSGELLDASNNR.G<br>R.LSGELLDASNNRGNVAVK.K<br>R.FGOVLSK.F<br>K.KSVAESIVYGALEAVEAR.A<br>R.NRSETTMAAR.L<br>K.EPLGVFHEALANIRPNIEVR.S<br>R.RVGGATYQVPEVRPDR.A<br>R.EIILPDR.F<br>R.AQALAIR.W<br>K.FMNSVMLDGKK.S<br>K.FMNSVMLDGKK.S<br>K.FMNSVMLDGK.K<br>R.GVLDIQGVKDR.K<br>R.EVITYIPGEGHNLQEHVSLIR.G<br>K.KPNSALR.K<br>R.VYTTTPK.K<br>R.LTNAREVITYIPGEGHNLQEHVSLIR.G<br>K.VPAMDANPQK.R<br>K.SKVPAMDANPQK.R<br>R.AAIDALLAGQAVLAK.G<br>R.DRITAEQDAAYR.A<br>K.GGSALDAVQAAVELMEDDPLFNAGR.G<br>R.ITAEQDAAYR.A<br>R.DTHGNLAAATSTGGLTGR.W<br>R.DTHGNLAAATSTGGLTGR.R<br>R.LGDAPIVGAETVADR.A<br>R.TDRAEVATSSGGWLVHGGAGTIR.R<br>K.GGSALDAVQAAVELMEDDPLFNAGR.G<br>R.TNELDAAIMDGR.T<br>R.GVEQMDPAWFATSHR.R<br>K.AATVNAADLLGLADQJGSIAPGK.S<br>R.LLANDAYEPVLAKE.I<br>R.LALAAGADSIHGTILDEATIAQWAK.S<br>R.GAATIIVEGK.I<br>R.TVIHAGHLLAEPGPAR.G<br>R.NLGDGDGATLALR.D<br>K.SADIIAVASDPLADVR.V<br>K.VAVPHAGADGIR.L<br>K.QMFDEAQAIVDTAHLFGK.K<br>K.FASTGGVNSR.I<br>K.TYYVPTLSTVNGYK.E<br>K.SLEQLVPR.G<br>R.NGDEFELMWQHGMPTLEALK.A<br>K.IAFGTDCGVSK.H<br>R.LLGDVAIEAR.R<br>R.LVFTNADADYAAR.V<br>K.LFDLIDER.M<br>R.YTPKPEATAYDVMVAHLGVDPVR.S<br>R.GIADLFDGICDIR.I<br>R.DVHAILDR.L<br>R.RLVFTNADADYAAR.V<br>R.EAVDTAIALDDGSFR.V<br>R.DTLGLATTAVR.E<br>R.GTWQVNWQLK.K<br>R.AEVAEGVIVR.E<br>R.LNDMEIIEGGADGATWWDKVPK.F<br>K.RVDAQTR.A<br>K.FAGWGENR.F<br>K.TGINELLR.D<br>K.KAVLLSFR.L<br>R.LNDMEIIEGGADGATWWDK.V<br>R.LNDMEIIEGGADGATWWDKVPK.F<br>R.EGAVLSMGVYLGASTK.I<br>R.EGAVLSMGVYLGASTK.I<br>R.AKTGINELLR.D<br>K.TGINELLR.D<br>K.HLSGSDADITGLEIPTGQPIVYEINDLSAR.E<br>R.SFDIPPPPLEAGSQWDLSDAPR.Y<br>R.YAGIAIPSTESLKDITAR.V<br>R.VLPHYEAIAIAPQLAAGR.T<br>R.HYGGTLGLDKAETA.AK.H<br>R.HGQSQWNLENR.F<br>R.TVLISAHGNSLR.A<br>K.GAAEWAAGELMK.A<br>K.HGQEQVR.I<br>R.FTGWWDVVDVTEK.G<br>K.TLNLALEAMGR.L<br>R.RSFDIPPPPLEAGSQWDLSDAPR.Y<br>R.HYGGTLGLDK.A<br>R.FTGWWDVVDVTEKGAEEWAAGELMK.A<br>K.HLSGSDADITGLEIPTGQPIVYEINDLSARER.Y<br>K.GVARDICTSVQTR.A<br>R.KAPVAEGER.K<br>R.ADLADGLLITDLVR.E<br>R.LFDLLETGASSAENYPPFDIEK.I<br>K.IAIGSSAAPVIEDKK.A<br>R.RFQLADPVR.V<br>K.IAIGSSAAPVIEDK.K<br>R.VERADLADGLLITDLVR.E<br>K.SDEIDITAQNMILTVSGR.K<br>R.KLLYSGIATR.A                                                                                                                                                                                                                                                                                                                                                                                                                                                                                                                                                                                                                                                                                                                                                                                                                                                                                                                                                                                                                                                                                                                                                             |
| YP_617868 | Sala_2830 | heat shock protein Hsp20                                           | 66.45%            | 11                      | R.LSGELLDASNNR.G<br>R.LSGELLDASNNRGNVAVK.K<br>R.FGOVLSK.F<br>K.KSVAESIVYGALEAVEAR.A<br>R.NRSETTMAAR.L<br>K.EPLGVFHEALANIRPNIEVR.S<br>R.RVGGATYQVPEVRPDR.A<br>R.EIILPDR.F<br>R.AQALAIR.W<br>K.FMNSVMLDGKK.S<br>K.FMNSVMLDGKK.S<br>K.FMNSVMLDGK.K<br>R.GVLDIQGVKDR.K<br>R.EVITYIPGEGHNLQEHVSLIR.G<br>K.KPNSALR.K<br>R.VYTTTPK.K<br>R.LTNAREVITYIPGEGHNLQEHVSLIR.G<br>K.VPAMDANPQK.R<br>K.SKVPAMDANPQK.R<br>R.AAIDALLAGQAVLAK.G<br>R.DRITAEQDAAYR.A<br>K.GGSALDAVQAAVELMEDDPLFNAGR.G<br>R.ITAEQDAAYR.A<br>R.DTHGNLAAATSTGGLTGR.W<br>R.DTHGNLAAATSTGGLTGR.R<br>R.LGDAPIVGAETVADR.A<br>R.TDRAEVATSSGGWLVHGGAGTIR.R<br>K.GGSALDAVQAAVELMEDDPLFNAGR.G<br>R.TNELDAAIMDGR.T<br>R.GVEQMDPAWFATSHR.R<br>K.AATVNAADLLGLADQJGSIAPGK.S<br>R.LLANDAYEPVLAKE.I<br>R.LALAAGADSIHGTILDEATIAQWAK.S<br>R.GAATIIVEGK.I<br>R.TVIHAGHLLAEPGPAR.G<br>R.NLGDGDGATLALR.D<br>K.SADIIAVASDPLADVR.V<br>K.VAVPHAGADGIR.L<br>K.QMFDEAQAIVDTAHLFGK.K<br>K.FASTGGVNSR.I<br>K.TYYVPTLSTVNGYK.E<br>K.SLEQLVPR.G<br>R.NGDEFELMWQHGMPTLEALK.A<br>K.IAFGTDCGVSK.H<br>R.LLGDVAIEAR.R<br>R.LVFTNADADYAAR.V<br>K.LFDLIDER.M<br>R.YTPKPEATAYDVMVAHLGVDPVR.S<br>R.GIADLFDGICDIR.I<br>R.DVHAILDR.L<br>R.RLVFTNADADYAAR.V<br>R.EAVDTAIALDDGSFR.V<br>R.DTLGLATTAVR.E<br>R.GTWQVNWQLK.K<br>R.AEVAEGVIVR.E<br>R.LNDMEIIEGGADGATWWDKVPK.F<br>K.RVDAQTR.A<br>K.FAGWGENR.F<br>K.TGINELLR.D<br>K.KAVLLSFR.L<br>R.LNDMEIIEGGADGATWWDK.V<br>R.LNDMEIIEGGADGATWWDKVPK.F<br>R.EGAVLSMGVYLGASTK.I<br>R.EGAVLSMGVYLGASTK.I<br>R.AKTGINELLR.D<br>K.TGINELLR.D<br>K.HLSGSDADITGLEIPTGQPIVYEINDLSAR.E<br>R.SFDIPPPPLEAGSQWDLSDAPR.Y<br>R.YAGIAIPSTESLKDITAR.V<br>R.VLPHYEAIAIAPQLAAGR.T<br>R.HYGGTLGLDKAETA.AK.H<br>R.HGQSQWNLENR.F<br>R.TVLISAHGNSLR.A<br>K.GAAEWAAGELMK.A<br>K.HGQEQVR.I<br>R.FTGWWDVVDVTEK.G<br>K.TLNLALEAMGR.L<br>R.RSFDIPPPPLEAGSQWDLSDAPR.Y<br>R.HYGGTLGLDK.A<br>R.FTGWWDVVDVTEKGAEEWAAGELMK.A<br>K.HLSGSDADITGLEIPTGQPIVYEINDLSARER.Y<br>K.GVARDICTSVQTR.A<br>R.KAPVAEGER.K<br>R.ADLADGLLITDLVR.E<br>R.LFDLLETGASSAENYPPFDIEK.I<br>K.IAIGSSAAPVIEDKK.A<br>R.RFQLADPVR.V<br>K.IAIGSSAAPVIEDK.K<br>R.VERADLADGLLITDLVR.E<br>K.SDEIDITAQNMILTVSGR.K<br>R.KLLYSGIATR.A                                                                                                                                                                                                                                                                                                                                                                                                                                                                                                                                                                                                                                                                                                                                                                                                                                                                                                                                                                                                                                                                                                                                                             |

| Accession | Locus tag | Description                                            | Sequence coverage | No. peptides identified | List of peptides identified                                                                                                                                                                                                                                                                                                                                                                                                                                                                                                                                                                                                                                                                                                                                                                                                                                                                                                                                                                                                                                                                                                                                                                                                                                                                                                                                                                                                                                                                                                                                                                                                                                                                                                                                                                                                                                                                                                                                                                                                                                                                                                                                                                                                                                                                                                                                                                                                                                                                                                                                                                                                                                                                                                                                                                                                                                                                                                                                                                                                                                                                                           |
|-----------|-----------|--------------------------------------------------------|-------------------|-------------------------|-----------------------------------------------------------------------------------------------------------------------------------------------------------------------------------------------------------------------------------------------------------------------------------------------------------------------------------------------------------------------------------------------------------------------------------------------------------------------------------------------------------------------------------------------------------------------------------------------------------------------------------------------------------------------------------------------------------------------------------------------------------------------------------------------------------------------------------------------------------------------------------------------------------------------------------------------------------------------------------------------------------------------------------------------------------------------------------------------------------------------------------------------------------------------------------------------------------------------------------------------------------------------------------------------------------------------------------------------------------------------------------------------------------------------------------------------------------------------------------------------------------------------------------------------------------------------------------------------------------------------------------------------------------------------------------------------------------------------------------------------------------------------------------------------------------------------------------------------------------------------------------------------------------------------------------------------------------------------------------------------------------------------------------------------------------------------------------------------------------------------------------------------------------------------------------------------------------------------------------------------------------------------------------------------------------------------------------------------------------------------------------------------------------------------------------------------------------------------------------------------------------------------------------------------------------------------------------------------------------------------------------------------------------------------------------------------------------------------------------------------------------------------------------------------------------------------------------------------------------------------------------------------------------------------------------------------------------------------------------------------------------------------------------------------------------------------------------------------------------------------|
| YP_617870 | Sala_2832 | peptidase M14, carboxypeptidase A                      | 23.31%            | 7                       | R.FQLADFVR.V<br>K.APVAEGER.K<br>R.LDTTYDAGTLTIR.H<br>R.LDPVVGWSPER.S<br>K.DRESDFQWFHFR.V<br>R.TNYAGVNLNR.E<br>R.FHIVPMNMPDGSR.R<br>R.SPEVLCVR.N                                                                                                                                                                                                                                                                                                                                                                                                                                                                                                                                                                                                                                                                                                                                                                                                                                                                                                                                                                                                                                                                                                                                                                                                                                                                                                                                                                                                                                                                                                                                                                                                                                                                                                                                                                                                                                                                                                                                                                                                                                                                                                                                                                                                                                                                                                                                                                                                                                                                                                                                                                                                                                                                                                                                                                                                                                                                                                                                                                       |
| YP_617871 | Sala_2833 | hypothetical protein                                   | 37.50%            | 6                       | R.FGAVSMTLEMPFKDNR.D<br>R.LQLQGLAPAPESGR.A<br>R.FHNNAVAGWTPGTR.Y<br>K.APANQPSLAAAK.L<br>K.LAEALFKDFPGESGR.T<br>R.IDDAATGQALWEGR.A<br>R.ALTAVPWKAPANQPSLAAAK.L<br>R.RLAIDGGHHWESVGPDPDDLESR.T<br>R.TEAVGGFATILAR.G<br>R.RTEAVGGFATILAR.G<br>R.LAIDGGHHWESVGPDPDDLESR.T<br>K.ALFPFVGDLSR.S<br>R.SLGLDAGEVSEALLER.E<br>K.KALFPFVGDLSR.S<br>K.NDEALYALLADSEAR.D<br>R.AHVHIDSKK.A<br>.MNLSSLLYPATVR.A<br>R.PIDFNAVGLPVDLLVLLSPLDAGADHLK.A<br>R.NEAIAR.L<br>R.GLFLQAR.P<br>R.GAKNDEALYALLADSEAR.D<br>R.VSGHQIETGEALQHVADR.M<br>R.NTNALLVNSK.T<br>K.GHGQQAQDAHVAFEGAADR.I<br>R.MNAIADKYFSR.A<br>R.VDIPNSVSDVMMDLR.N<br>R.RDDGTIGWVEPR.<br>K.GHGQQAQDAHVAFEGAADRIEK.Q<br>R.AISAHATFGK.G<br>R.DDGTIGWVEPR.<br>K.TGAHNMVYR.R<br>K.GPHDSFQCDIVAHVMQGLVK.G<br>R.MNAIADKYFSR.A<br>R.MNAIADK.Y<br>R.QIGLGLASSAALPTASLAAR.R<br>R.HAEFVAGLNQLPLDVTV.<br>R.ETGVTFHAYFNER.D<br>R.VDELLDFGDPALJAHNAADFQFVNAELER.I<br>R.EIIFDIETTFQDPR.N<br>R.VLGNTHELAALAIHPAVFR.A<br>R.DVVLDIPLFEK.G<br>R.LQGGALVAEAEAR.F<br>R.VGVVPFDADAHVHR.L<br>R.VGAIIVSAPAWLQR.R<br>R.QPSSLISTHTDAAAGPSPALDELLEGAPIAVGAGGAAR.A<br>K.ADALAAIAER.R<br>K.AAVMDLDDPGDIR.G<br>R.LLVNASSLGMAGPPLDLDLSPDPDAIVYDLYVSPYLR.T<br>R.GTIGAMNTIVR.Q<br>K.SPLIHGFVLDALGMEGDYRR.A<br>K.LWIRPISDAFIADYVAQWDSIR.W<br>R.NIADALAEK.A<br>R.LFSAVAAR.D<br>R.AAGLAFETTAHVDEEMLTASLR.A<br>K.TANIPVPESPPSALFNLR.R<br>K.AAIAQFDDVEVVR.H<br>R.RMFADNGWPIVIVTR.R<br>R.MLDLPTVAALDAVTDALSR.M<br>R.LLSLNQAPETSYVDDERVK.A<br>K.TPTSIYLANR.G<br>R.LLSLNQAPETSYVDDER.V<br>R.ASPGMILFTLVNGLR.S<br>R.VAASLPPETFLGAGSPWTVATYVMVAGR.G<br>R.LAPFVVDGALASLEAPR.L<br>R.SSEANLYAGPDDIYVSPNQYR.K<br>K.GEVVSTFDPATR.H<br>K.DVVILLDSITR.L<br>R.VIDLVSQPK.G<br>R.AYNTVPSGK.V<br>K.VLTGGVDANALQRPK.R<br>K.LSLDVTDPYKDK.S<br>R.TGDTVEGEIR.A<br>R.SVKGEVSTFDPATR.H<br>K.LISVFDPPDVR.H<br>K.ELAEIEEIGSGTIEVLPDSFGFLR.S<br>R.LLNQNGTVDAMEFLDK.I<br>R.HRVNFDNLTPYPNQK.L<br>R.NIEEGSLIATLIDTGSR.M<br>R.KQQLMFSILK.E<br>R.HVQVAEMVIEK.A<br>K.TVLLQNIK.A<br>K.GTGNSEIVLDR.K<br>R.WFDNLTPYPNQK.L<br>K.SPAQLVEMAEELGVEGASTMR.K<br>K.GTGNSEIVLDRK.V<br>K.VLTGGVDANALQRP.P<br>K.TKSPAQLVEMAEELGVEGASTMR.K<br>K.ATTDNHPEVYLVLDVDERPEEVTDMQR.S<br>R.KEELVEK.D<br>K.TNEDFFDSMNQ.<br>R.IFPALDVGK.S<br>K.LSLDVTDPYK.D<br>R.MDEVIFEK.G<br>K.EELVEKDK.L<br>R.ALIDTGSVSGVPTIVTQLGLR.S<br>R.IVTDVAVLAENPADLSHVIGR.A<br>R.AIVPEIFGVNAGR.Q<br>R.IPAYVARPDADSSR.A<br>R.IHDALDPHK.V<br>R.FAPGVELDDIEAELNEAFYFGQYDADDGVK.D<br>R.FAPGVELDDIEAELNEAFYFGQYDADDGVKDEAAIR.W<br>R.RNDEGAR.L<br>R.WLHSQGASK.V<br>R.QKCDWAAEGYLAIPDFWR.F<br>R.AFFAEHLA.<br>R.LAYMAAR.T<br>K.VTLHDYGLDGHFAATHGNR.R<br>K.CDDWAAEGYLAIPDFWR.F<br>R.IDLAEAGLADLAAETESQR.V<br>K.STLINALAQR.E<br>K.AAVEGADILLWLGAPK.E<br>R.AAIQTLAAEGETTVVAGEAALR.L<br>R.ALANEALLDPLDYAAGGLSR.E<br>R.LIQEQPSDGGK.W<br>R.SPLFTGAIAGAPR.Y<br>R.IAGLDLADGTALTAR.A<br>R.SESYGMVDDLVQGVTEPYR.M<br>R.LTLVPEIESIDR.A<br>R.LRADNAAR.L<br>R.AGALLEAPVATADYGAIGLPLPGDGIAR.R<br>R.TIEGLEAVEMVPGYAVEYDHIDPR.A<br>R.PATAALFAR.R<br>R.AVVLATGTLGGR.L<br>R.AILSEVVEDAHYAPYAR.H<br>.MHSSATFDVYVGGGHAGTEAAAAAAR.L<br>R.TDAESGLVGTGR.I<br>R.HIADSAQLLALDTR.E<br>R.VATRPATISAR.A<br>R.GWLTQAFAPSTEQWAQIER.F |
| YP_617873 | Sala_2835 | hypothetical protein                                   | 34.23%            | 4                       | R.LAIDGGHHWESVGPDPDDLESR.T<br>R.TEAVGGFATILAR.G<br>R.RTEAVGGFATILAR.G<br>R.LAIDGGHHWESVGPDPDDLESR.T<br>K.ALFPFVGDLSR.S<br>R.SLGLDAGEVSEALLER.E<br>K.KALFPFVGDLSR.S<br>K.NDEALYALLADSEAR.D<br>R.AHVHIDSKK.A<br>.MNLSSLLYPATVR.A<br>R.PIDFNAVGLPVDLLVLLSPLDAGADHLK.A<br>R.NEAIAR.L<br>R.GLFLQAR.P<br>R.GAKNDEALYALLADSEAR.D<br>R.VSGHQIETGEALQHVADR.M<br>R.NTNALLVNSK.T<br>K.GHGQQAQDAHVAFEGAADR.I<br>R.MNAIADKYFSR.A<br>R.VDIPNSVSDVMMDLR.N<br>R.RDDGTIGWVEPR.<br>K.GHGQQAQDAHVAFEGAADRIEK.Q<br>R.AISAHATFGK.G<br>R.DDGTIGWVEPR.<br>K.TGAHNMVYR.R<br>K.GPHDSFQCDIVAHVMQGLVK.G<br>R.MNAIADKYFSR.A<br>R.MNAIADK.Y<br>R.QIGLGLASSAALPTASLAAR.R<br>R.HAEFVAGLNQLPLDVTV.<br>R.ETGVTFHAYFNER.D<br>R.VDELLDFGDPALJAHNAADFQFVNAELER.I<br>R.EIIFDIETTFQDPR.N<br>R.VLGNTHELAALAIHPAVFR.A<br>R.DVVLDIPLFEK.G<br>R.LQGGALVAEAEAR.F<br>R.VGVVPFDADAHVHR.L<br>R.VGAIIVSAPAWLQR.R<br>R.QPSSLISTHTDAAAGPSPALDELLEGAPIAVGAGGAAR.A<br>K.ADALAAIAER.R<br>K.AAVMDLDDPGDIR.G<br>R.LLVNASSLGMAGPPLDLDLSPDPDAIVYDLYVSPYLR.T<br>R.GTIGAMNTIVR.Q<br>K.SPLIHGFVLDALGMEGDYRR.A<br>K.LWIRPISDAFIADYVAQWDSIR.W<br>R.NIADALAEK.A<br>R.LFSAVAAR.D<br>R.AAGLAFETTAHVDEEMLTASLR.A<br>K.TANIPVPESPPSALFNLR.R<br>K.AAIAQFDDVEVVR.H<br>R.RMFADNGWPIVIVTR.R<br>R.MLDLPTVAALDAVTDALSR.M<br>R.LLSLNQAPETSYVDDERVK.A<br>K.TPTSIYLANR.G<br>R.LLSLNQAPETSYVDDER.V<br>R.ASPGMILFTLVNGLR.S<br>R.VAASLPPETFLGAGSPWTVATYVMVAGR.G<br>R.LAPFVVDGALASLEAPR.L<br>R.SSEANLYAGPDDIYVSPNQYR.K<br>K.GEVVSTFDPATR.H<br>K.DVVILLDSITR.L<br>R.VIDLVSQPK.G<br>R.AYNTVPSGK.V<br>K.VLTGGVDANALQRPK.R<br>K.LSLDVTDPYKDK.S<br>R.TGDTVEGEIR.A<br>R.SVKGEVSTFDPATR.H<br>K.LISVFDPPDVR.H<br>K.ELAEIEEIGSGTIEVLPDSFGFLR.S<br>R.LLNQNGTVDAMEFLDK.I<br>R.HRVNFDNLTPYPNQK.L<br>R.NIEEGSLIATLIDTGSR.M<br>R.KQQLMFSILK.E<br>R.HVQVAEMVIEK.A<br>K.TVLLQNIK.A<br>K.GTGNSEIVLDR.K<br>R.WFDNLTPYPNQK.L<br>K.SPAQLVEMAEELGVEGASTMR.K<br>K.GTGNSEIVLDRK.V<br>K.VLTGGVDANALQRP.P<br>K.TKSPAQLVEMAEELGVEGASTMR.K<br>K.ATTDNHPEVYLVLDVDERPEEVTDMQR.S<br>R.KEELVEK.D<br>K.TNEDFFDSMNQ.<br>R.IFPALDVGK.S<br>K.LSLDVTDPYK.D<br>R.MDEVIFEK.G<br>K.EELVEKDK.L<br>R.ALIDTGSVSGVPTIVTQLGLR.S<br>R.IVTDVAVLAENPADLSHVIGR.A<br>R.AIVPEIFGVNAGR.Q<br>R.IPAYVARPDADSSR.A<br>R.IHDALDPHK.V<br>R.FAPGVELDDIEAELNEAFYFGQYDADDGVK.D<br>R.FAPGVELDDIEAELNEAFYFGQYDADDGVKDEAAIR.W<br>R.RNDEGAR.L<br>R.WLHSQGASK.V<br>R.QKCDWAAEGYLAIPDFWR.F<br>R.AFFAEHLA.<br>R.LAYMAAR.T<br>K.VTLHDYGLDGHFAATHGNR.R<br>K.CDDWAAEGYLAIPDFWR.F<br>R.IDLAEAGLADLAAETESQR.V<br>K.STLINALAQR.E<br>K.AAVEGADILLWLGAPK.E<br>R.AAIQTLAAEGETTVVAGEAALR.L<br>R.ALANEALLDPLDYAAGGLSR.E<br>R.LIQEQPSDGGK.W<br>R.SPLFTGAIAGAPR.Y<br>R.IAGLDLADGTALTAR.A<br>R.SESYGMVDDLVQGVTEPYR.M<br>R.LTLVPEIESIDR.A<br>R.LRADNAAR.L<br>R.AGALLEAPVATADYGAIGLPLPGDGIAR.R<br>R.TIEGLEAVEMVPGYAVEYDHIDPR.A<br>R.PATAALFAR.R<br>R.AVVLATGTLGGR.L<br>R.AILSEVVEDAHYAPYAR.H<br>.MHSSATFDVYVGGGHAGTEAAAAAAR.L<br>R.TDAESGLVGTGR.I<br>R.HIADSAQLLALDTR.E<br>R.VATRPATISAR.A<br>R.GWLTQAFAPSTEQWAQIER.F                                                                                                                                                                   |
| YP_617874 | Sala_2836 | putative PTS IIA-like nitrogen-regulatory protein PtsN | 74.03%            | 10                      | R.FGAVSMTLEMPFKDNR.D<br>R.LQLQGLAPAPESGR.A<br>R.FHNNAVAGWTPGTR.Y<br>K.APANQPSLAAAK.L<br>K.LAEALFKDFPGESGR.T<br>R.IDDAATGQALWEGR.A<br>R.ALTAVPWKAPANQPSLAAAK.L<br>R.RLAIDGGHHWESVGPDPDDLESR.T<br>R.TEAVGGFATILAR.G<br>R.RTEAVGGFATILAR.G<br>R.LAIDGGHHWESVGPDPDDLESR.T<br>K.ALFPFVGDLSR.S<br>R.SLGLDAGEVSEALLER.E<br>K.KALFPFVGDLSR.S<br>K.NDEALYALLADSEAR.D<br>R.AHVHIDSKK.A<br>.MNLSSLLYPATVR.A<br>R.PIDFNAVGLPVDLLVLLSPLDAGADHLK.A<br>R.NEAIAR.L<br>R.GLFLQAR.P<br>R.GAKNDEALYALLADSEAR.D<br>R.VSGHQIETGEALQHVADR.M<br>R.NTNALLVNSK.T<br>K.GHGQQAQDAHVAFEGAADR.I<br>R.MNAIADKYFSR.A<br>R.VDIPNSVSDVMMDLR.N<br>R.RDDGTIGWVEPR.<br>K.GHGQQAQDAHVAFEGAADRIEK.Q<br>R.AISAHATFGK.G<br>R.DDGTIGWVEPR.<br>K.TGAHNMVYR.R<br>K.GPHDSFQCDIVAHVMQGLVK.G<br>R.MNAIADKYFSR.A<br>R.MNAIADK.Y<br>R.QIGLGLASSAALPTASLAAR.R<br>R.HAEFVAGLNQLPLDVTV.<br>R.ETGVTFHAYFNER.D<br>R.VDELLDFGDPALJAHNAADFQFVNAELER.I<br>R.EIIFDIETTFQDPR.N<br>R.VLGNTHELAALAIHPAVFR.A<br>R.DVVLDIPLFEK.G<br>R.LQGGALVAEAEAR.F<br>R.VGVVPFDADAHVHR.L<br>R.VGAIIVSAPAWLQR.R<br>R.QPSSLISTHTDAAAGPSPALDELLEGAPIAVGAGGAAR.A<br>K.ADALAAIAER.R<br>K.AAVMDLDDPGDIR.G<br>R.LLVNASSLGMAGPPLDLDLSPDPDAIVYDLYVSPYLR.T<br>R.GTIGAMNTIVR.Q<br>K.SPLIHGFVLDALGMEGDYRR.A<br>K.LWIRPISDAFIADYVAQWDSIR.W<br>R.NIADALAEK.A<br>R.LFSAVAAR.D<br>R.AAGLAFETTAHVDEEMLTASLR.A<br>K.TANIPVPESPPSALFNLR.R<br>K.AAIAQFDDVEVVR.H<br>R.RMFADNGWPIVIVTR.R<br>R.MLDLPTVAALDAVTDALSR.M<br>R.LLSLNQAPETSYVDDERVK.A<br>K.TPTSIYLANR.G<br>R.LLSLNQAPETSYVDDER.V<br>R.ASPGMILFTLVNGLR.S<br>R.VAASLPPETFLGAGSPWTVATYVMVAGR.G<br>R.LAPFVVDGALASLEAPR.L<br>R.SSEANLYAGPDDIYVSPNQYR.K<br>K.GEVVSTFDPATR.H<br>K.DVVILLDSITR.L<br>R.VIDLVSQPK.G<br>R.AYNTVPSGK.V<br>K.VLTGGVDANALQRPK.R<br>K.LSLDVTDPYKDK.S<br>R.TGDTVEGEIR.A<br>R.SVKGEVSTFDPATR.H<br>K.LISVFDPPDVR.H<br>K.ELAEIEEIGSGTIEVLPDSFGFLR.S<br>R.LLNQNGTVDAMEFLDK.I<br>R.HRVNFDNLTPYPNQK.L<br>R.NIEEGSLIATLIDTGSR.M<br>R.KQQLMFSILK.E<br>R.HVQVAEMVIEK.A<br>K.TVLLQNIK.A<br>K.GTGNSEIVLDR.K<br>R.WFDNLTPYPNQK.L<br>K.SPAQLVEMAEELGVEGASTMR.K<br>K.GTGNSEIVLDRK.V<br>K.VLTGGVDANALQRP.P<br>K.TKSPAQLVEMAEELGVEGASTMR.K<br>K.ATTDNHPEVYLVLDVDERPEEVTDMQR.S<br>R.KEELVEK.D<br>K.TNEDFFDSMNQ.<br>R.IFPALDVGK.S<br>K.LSLDVTDPYK.D<br>R.MDEVIFEK.G<br>K.EELVEKDK.L<br>R.ALIDTGSVSGVPTIVTQLGLR.S<br>R.IVTDVAVLAENPADLSHVIGR.A<br>R.AIVPEIFGVNAGR.Q<br>R.IPAYVARPDADSSR.A<br>R.IHDALDPHK.V<br>R.FAPGVELDDIEAELNEAFYFGQYDADDGVK.D<br>R.FAPGVELDDIEAELNEAFYFGQYDADDGVKDEAAIR.W<br>R.RNDEGAR.L<br>R.WLHSQGASK.V<br>R.QKCDWAAEGYLAIPDFWR.F<br>R.AFFAEHLA.<br>R.LAYMAAR.T<br>K.VTLHDYGLDGHFAATHGNR.R<br>K.CDDWAAEGYLAIPDFWR.F<br>R.IDLAEAGLADLAAETESQR.V<br>K.STLINALAQR.E<br>K.AAVEGADILLWLGAPK.E<br>R.AAIQTLAAEGETTVVAGEAALR.L<br>R.ALANEALLDPLDYAAGGLSR.E<br>R.LIQEQPSDGGK.W<br>R.SPLFTGAIAGAPR.Y<br>R.IAGLDLADGTALTAR.A<br>R.SESYGMVDDLVQGVTEPYR.M<br>R.LTLVPEIESIDR.A<br>R.LRADNAAR.L<br>R.AGALLEAPVATADYGAIGLPLPGDGIAR.R<br>R.TIEGLEAVEMVPGYAVEYDHIDPR.A<br>R.PATAALFAR.R<br>R.AVVLATGTLGGR.L<br>R.AILSEVVEDAHYAPYAR.H<br>.MHSSATFDVYVGGGHAGTEAAAAAAR.L<br>R.TDAESGLVGTGR.I<br>R.HIADSAQLLALDTR.E<br>R.VATRPATISAR.A<br>R.GWLTQAFAPSTEQWAQIER.F |
| YP_617875 | Sala_2837 | sigma 54 modulation protein/ribosomal protein S30EA    | 69.11%            | 13                      | R.FGAVSMTLEMPFKDNR.D<br>R.LQLQGLAPAPESGR.A<br>R.FHNNAVAGWTPGTR.Y<br>K.APANQPSLAAAK.L<br>K.LAEALFKDFPGESGR.T<br>R.IDDAATGQALWEGR.A<br>R.ALTAVPWKAPANQPSLAAAK.L<br>R.RLAIDGGHHWESVGPDPDDLESR.T<br>R.TEAVGGFATILAR.G<br>R.RTEAVGGFATILAR.G<br>R.LAIDGGHHWESVGPDPDDLESR.T<br>K.ALFPFVGDLSR.S<br>R.SLGLDAGEVSEALLER.E<br>K.KALFPFVGDLSR.S<br>K.NDEALYALLADSEAR.D<br>R.AHVHIDSKK.A<br>.MNLSSLLYPATVR.A<br>R.PIDFNAVGLPVDLLVLLSPLDAGADHLK.A<br>R.NEAIAR.L<br>R.GLFLQAR.P<br>R.GAKNDEALYALLADSEAR.D<br>R.VSGHQIETGEALQHVADR.M<br>R.NTNALLVNSK.T<br>K.GHGQQAQDAHVAFEGAADR.I<br>R.MNAIADKYFSR.A<br>R.VDIPNSVSDVMMDLR.N<br>R.RDDGTIGWVEPR.<br>K.GHGQQAQDAHVAFEGAADRIEK.Q<br>R.AISAHATFGK.G<br>R.DDGTIGWVEPR.<br>K.TGAHNMVYR.R<br>K.GPHDSFQCDIVAHVMQGLVK.G<br>R.MNAIADKYFSR.A<br>R.MNAIADK.Y<br>R.QIGLGLASSAALPTASLAAR.R<br>R.HAEFVAGLNQLPLDVTV.<br>R.ETGVTFHAYFNER.D<br>R.VDELLDFGDPALJAHNAADFQFVNAELER.I<br>R.EIIFDIETTFQDPR.N<br>R.VLGNTHELAALAIHPAVFR.A<br>R.DVVLDIPLFEK.G<br>R.LQGGALVAEAEAR.F<br>R.VGVVPFDADAHVHR.L<br>R.VGAIIVSAPAWLQR.R<br>R.QPSSLISTHTDAAAGPSPALDELLEGAPIAVGAGGAAR.A<br>K.ADALAAIAER.R<br>K.AAVMDLDDPGDIR.G<br>R.LLVNASSLGMAGPPLDLDLSPDPDAIVYDLYVSPYLR.T<br>R.GTIGAMNTIVR.Q<br>K.SPLIHGFVLDALGMEGDYRR.A<br>K.LWIRPISDAFIADYVAQWDSIR.W<br>R.NIADALAEK.A<br>R.LFSAVAAR.D<br>R.AAGLAFETTAHVDEEMLTASLR.A<br>K.TANIPVPESPPSALFNLR.R<br>K.AAIAQFDDVEVVR.H<br>R.RMFADNGWPIVIVTR.R<br>R.MLDLPTVAALDAVTDALSR.M<br>R.LLSLNQAPETSYVDDERVK.A<br>K.TPTSIYLANR.G<br>R.LLSLNQAPETSYVDDER.V<br>R.ASPGMILFTLVNGLR.S<br>R.VAASLPPETFLGAGSPWTVATYVMVAGR.G<br>R.LAPFVVDGALASLEAPR.L<br>R.SSEANLYAGPDDIYVSPNQYR.K<br>K.GEVVSTFDPATR.H<br>K.DVVILLDSITR.L<br>R.VIDLVSQPK.G<br>R.AYNTVPSGK.V<br>K.VLTGGVDANALQRPK.R<br>K.LSLDVTDPYKDK.S<br>R.TGDTVEGEIR.A<br>R.SVKGEVSTFDPATR.H<br>K.LISVFDPPDVR.H<br>K.ELAEIEEIGSGTIEVLPDSFGFLR.S<br>R.LLNQNGTVDAMEFLDK.I<br>R.HRVNFDNLTPYPNQK.L<br>R.NIEEGSLIATLIDTGSR.M<br>R.KQQLMFSILK.E<br>R.HVQVAEMVIEK.A<br>K.TVLLQNIK.A<br>K.GTGNSEIVLDR.K<br>R.WFDNLTPYPNQK.L<br>K.SPAQLVEMAEELGVEGASTMR.K<br>K.GTGNSEIVLDRK.V<br>K.VLTGGVDANALQRP.P<br>K.TKSPAQLVEMAEELGVEGASTMR.K<br>K.ATTDNHPEVYLVLDVDERPEEVTDMQR.S<br>R.KEELVEK.D<br>K.TNEDFFDSMNQ.<br>R.IFPALDVGK.S<br>K.LSLDVTDPYK.D<br>R.MDEVIFEK.G<br>K.EELVEKDK.L<br>R.ALIDTGSVSGVPTIVTQLGLR.S<br>R.IVTDVAVLAENPADLSHVIGR.A<br>R.AIVPEIFGVNAGR.Q<br>R.IPAYVARPDADSSR.A<br>R.IHDALDPHK.V<br>R.FAPGVELDDIEAELNEAFYFGQYDADDGVK.D<br>R.FAPGVELDDIEAELNEAFYFGQYDADDGVKDEAAIR.W<br>R.RNDEGAR.L<br>R.WLHSQGASK.V<br>R.QKCDWAAEGYLAIPDFWR.F<br>R.AFFAEHLA.<br>R.LAYMAAR.T<br>K.VTLHDYGLDGHFAATHGNR.R<br>K.CDDWAAEGYLAIPDFWR.F<br>R.IDLAEAGLADLAAETESQR.V<br>K.STLINALAQR.E<br>K.AAVEGADILLWLGAPK.E<br>R.AAIQTLAAEGETTVVAGEAALR.L<br>R.ALANEALLDPLDYAAGGLSR.E<br>R.LIQEQPSDGGK.W<br>R.SPLFTGAIAGAPR.Y<br>R.IAGLDLADGTALTAR.A<br>R.SESYGMVDDLVQGVTEPYR.M<br>R.LTLVPEIESIDR.A<br>R.LRADNAAR.L<br>R.AGALLEAPVATADYGAIGLPLPGDGIAR.R<br>R.TIEGLEAVEMVPGYAVEYDHIDPR.A<br>R.PATAALFAR.R<br>R.AVVLATGTLGGR.L<br>R.AILSEVVEDAHYAPYAR.H<br>.MHSSATFDVYVGGGHAGTEAAAAAAR.L<br>R.TDAESGLVGTGR.I<br>R.HIADSAQLLALDTR.E<br>R.VATRPATISAR.A<br>R.GWLTQAFAPSTEQWAQIER.F |
| YP_617876 | Sala_2838 | DNA polymerase III, epsilon subunit                    | 42.42%            | 5                       | R.QIGLGLASSAALPTASLAAR.R<br>R.HAEFVAGLNQLPLDVTV.<br>R.ETGVTFHAYFNER.D<br>R.VDELLDFGDPALJAHNAADFQFVNAELER.I<br>R.EIIFDIETTFQDPR.N<br>R.VLGNTHELAALAIHPAVFR.A<br>R.DVVLDIPLFEK.G<br>R.LQGGALVAEAEAR.F<br>R.VGVVPFDADAHVHR.L<br>R.VGAIIVSAPAWLQR.R<br>R.QPSSLISTHTDAAAGPSPALDELLEGAPIAVGAGGAAR.A<br>K.ADALAAIAER.R<br>K.AAVMDLDDPGDIR.G<br>R.LLVNASSLGMAGPPLDLDLSPDPDAIVYDLYVSPYLR.T<br>R.GTIGAMNTIVR.Q<br>K.SPLIHGFVLDALGMEGDYRR.A<br>K.LWIRPISDAFIADYVAQWDSIR.W<br>R.NIADALAEK.A<br>R.LFSAVAAR.D<br>R.AAGLAFETTAHVDEEMLTASLR.A<br>K.TANIPVPESPPSALFNLR.R<br>K.AAIAQFDDVEVVR.H<br>R.RMFADNGWPIVIVTR.R<br>R.MLDLPTVAALDAVTDALSR.M<br>R.LLSLNQAPETSYVDDERVK.A<br>K.TPTSIYLANR.G<br>R.LLSLNQAPETSYVDDER.V<br>R.ASPGMILFTLVNGLR.S<br>R.VAASLPPETFLGAGSPWTVATYVMVAGR.G<br>R.LAPFVVDGALASLEAPR.L<br>R.SSEANLYAGPDDIYVSPNQYR.K<br>K.GEVVSTFDPATR.H<br>K.DVVILLDSITR.L<br>R.VIDLVSQPK.G<br>R.AYNTVPSGK.V<br>K.VLTGGVDANALQRPK.R<br>K.LSLDVTDPYKDK.S<br>R.TGDTVEGEIR.A<br>R.SVKGEVSTFDPATR.H<br>K.LISVFDPPDVR.H<br>K.ELAEIEEIGSGTIEVLPDSFGFLR.S<br>R.LLNQNGTVDAMEFLDK.I<br>R.HRVNFDNLTPYPNQK.L<br>R.NIEEGSLIATLIDTGSR.M<br>R.KQQLMFSILK.E<br>R.HVQVAEMVIEK.A<br>K.TVLLQNIK.A<br>K.GTGNSEIVLDR.K<br>R.WFDNLTPYPNQK.L<br>K.SPAQLVEMAEELGVEGASTMR.K<br>K.GTGNSEIVLDRK.V<br>K.VLTGGVDANALQRP.P<br>K.TKSPAQLVEMAEELGVEGASTMR.K<br>K.ATTDNHPEVYLVLDVDERPEEVTDMQR.S<br>R.KEELVEK.D<br>K.TNEDFFDSMNQ.<br>R.IFPALDVGK.S<br>K.LSLDVTDPYK.D<br>R.MDEVIFEK.G<br>K.EELVEKDK.L<br>R.ALIDTGSVSGVPTIVTQLGLR.S<br>R.IVTDVAVLAENPADLSHVIGR.A<br>R.AIVPEIFGVNAGR.Q<br>R.IPAYVARPDADSSR.A<br>R.IHDALDPHK.V<br>R.FAPGVELDDIEAELNEAFYFGQYDADDGVK.D<br>R.FAPGVELDDIEAELNEAFYFGQYDADDGVKDEAAIR.W<br>R.RNDEGAR.L<br>R.WLHSQGASK.V<br>R.QKCDWAAEGYLAIPDFWR.F<br>R.AFFAEHLA.<br>R.LAYMAAR.T<br>K.VTLHDYGLDGHFAATHGNR.R<br>K.CDDWAAEGYLAIPDFWR.F<br>R.IDLAEAGLADLAAETESQR.V<br>K.STLINALAQR.E<br>K.AAVEGADILLWLGAPK.E<br>R.AAIQTLAAEGETTVVAGEAALR.L<br>R.ALANEALLDPLDYAAGGLSR.E<br>R.LIQEQPSDGGK.W<br>R.SPLFTGAIAGAPR.Y<br>R.IAGLDLADGTALTAR.A<br>R.SESYGMVDDLVQGVTEPYR.M<br>R.LTLVPEIESIDR.A<br>R.LRADNAAR.L<br>R.AGALLEAPVATADYGAIGLPLPGDGIAR.R<br>R.TIEGLEAVEMVPGYAVEYDHIDPR.A<br>R.PATAALFAR.R<br>R.AVVLATGTLGGR.L<br>R.AILSEVVEDAHYAPYAR.H<br>.MHSSATFDVYVGGGHAGTEAAAAAAR.L<br>R.TDAESGLVGTGR.I<br>R.HIADSAQLLALDTR.E<br>R.VATRPATISAR.A<br>R.GWLTQAFAPSTEQWAQIER.F                                                                                                                                                                                                                                                                                                                                                                                                                                                                                                                                                                                                                                                                                                                                                                                     |
| YP_617877 | Sala_2839 | Dephospho-CoA kinase                                   | 37.68%            | 5                       | R.QIGLGLASSAALPTASLAAR.R<br>R.HAEFVAGLNQLPLDVTV.<br>R.ETGVTFHAYFNER.D<br>R.VDELLDFGDPALJAHNAADFQFVNAELER.I<br>R.EIIFDIETTFQDPR.N<br>R.VLGNTHELAALAIHPAVFR.A<br>R.DVVLDIPLFEK.G<br>R.LQGGALVAEAEAR.F<br>R.VGVVPFDADAHVHR.L<br>R.VGAIIVSAPAWLQR.R<br>R.QPSSLISTHTDAAAGPSPALDELLEGAPIAVGAGGAAR.A<br>K.ADALAAIAER.R<br>K.AAVMDLDDPGDIR.G<br>R.LLVNASSLGMAGPPLDLDLSPDPDAIVYDLYVSPYLR.T<br>R.GTIGAMNTIVR.Q<br>K.SPLIHGFVLDALGMEGDYRR.A<br>K.LWIRPISDAFIADYVAQWDSIR.W<br>R.NIADALAEK.A<br>R.LFSAVAAR.D<br>R.AAGLAFETTAHVDEEMLTASLR.A<br>K.TANIPVPESPPSALFNLR.R<br>K.AAIAQFDDVEVVR.H<br>R.RMFADNGWPIVIVTR.R<br>R.MLDLPTVAALDAVTDALSR.M<br>R.LLSLNQAPETSYVDDERVK.A<br>K.TPTSIYLANR.G<br>R.LLSLNQAPETSYVDDER.V<br>R.ASPGMILFTLVNGLR.S<br>R.VAASLPPETFLGAGSPWTVATYVMVAGR.G<br>R.LAPFVVDGALASLEAPR.L<br>R.SSEANLYAGPDDIYVSPNQYR.K<br>K.GEVVSTFDPATR.H<br>K.DVVILLDSITR.L<br>R.VIDLVSQPK.G<br>R.AYNTVPSGK.V<br>K.VLTGGVDANALQRPK.R<br>K.LSLDVTDPYKDK.S<br>R.TGDTVEGEIR.A<br>R.SVKGEVSTFDPATR.H<br>K.LISVFDPPDVR.H<br>K.ELAEIEEIGSGTIEVLPDSFGFLR.S<br>R.LLNQNGTVDAMEFLDK.I<br>R.HRVNFDNLTPYPNQK.L<br>R.NIEEGSLIATLIDTGSR.M<br>R.KQQLMFSILK.E<br>R.HVQVAEMVIEK.A<br>K.TVLLQNIK.A<br>K.GTGNSEIVLDR.K<br>R.WFDNLTPYPNQK.L<br>K.SPAQLVEMAEELGVEGASTMR.K<br>K.GTGNSEIVLDRK.V<br>K.VLTGGVDANALQRP.P<br>K.TKSPAQLVEMAEELGVEGASTMR.K<br>K.ATTDNHPEVYLVLDVDERPEEVTDMQR.S<br>R.KEELVEK.D<br>K.TNEDFFDSMNQ.<br>R.IFPALDVGK.S<br>K.LSLDVTDPYK.D<br>R.MDEVIFEK.G<br>K.EELVEKDK.L<br>R.ALIDTGSVSGVPTIVTQLGLR.S<br>R.IVTDVAVLAENPADLSHVIGR.A<br>R.AIVPEIFGVNAGR.Q<br>R.IPAYVARPDADSSR.A<br>R.IHDALDPHK.V<br>R.FAPGVELDDIEAELNEAFYFGQYDADDGVK.D<br>R.FAPGVELDDIEAELNEAFYFGQYDADDGVKDEAAIR.W<br>R.RNDEGAR.L<br>R.WLHSQGASK.V<br>R.QKCDWAAEGYLAIPDFWR.F<br>R.AFFAEHLA.<br>R.LAYMAAR.T<br>K.VTLHDYGLDGHFAATHGNR.R<br>K.CDDWAAEGYLAIPDFWR.F<br>R.IDLAEAGLADLAAETESQR.V<br>K.STLINALAQR.E<br>K.AAVEGADILLWLGAPK.E<br>R.AAIQTLAAEGETTVVAGEAALR.L<br>R.ALANEALLDPLDYAAGGLSR.E<br>R.LIQEQPSDGGK.W<br>R.SPLFTGAIAGAPR.Y<br>R.IAGLDLADGTALTAR.A<br>R.SESYGMVDDLVQGVTEPYR.M<br>R.LTLVPEIESIDR.A<br>R.LRADNAAR.L<br>R.AGALLEAPVATADYGAIGLPLPGDGIAR.R<br>R.TIEGLEAVEMVPGYAVEYDHIDPR.A<br>R.PATAALFAR.R<br>R.AVVLATGTLGGR.L<br>R.AILSEVVEDAHYAPYAR.H<br>.MHSSATFDVYVGGGHAGTEAAAAAAR.L<br>R.TDAESGLVGTGR.I<br>R.HIADSAQLLALDTR.E<br>R.VATRPATISAR.A<br>R.GWLTQAFAPSTEQWAQIER.F                                                                                                                                                                                                                                                                                                                                                                                                                                                                                                                                                                                                                                                                                                                                                                                     |
| YP_617878 | Sala_2840 | shikimate 5-dehydrogenase                              | 48.91%            | 6                       | R.QPSSLISTHTDAAAGPSPALDELLEGAPIAVGAGGAAR.A<br>K.ADALAAIAER.R<br>K.AAVMDLDDPGDIR.G<br>R.LLVNASSLGMAGPPLDLDLSPDPDAIVYDLYVSPYLR.T<br>R.GTIGAMNTIVR.Q<br>K.SPLIHGFVLDALGMEGDYRR.A<br>K.LWIRPISDAFIADYVAQWDSIR.W<br>R.NIADALAEK.A<br>R.LFSAVAAR.D<br>R.AAGLAFETTAHVDEEMLTASLR.A<br>K.TANIPVPESPPSALFNLR.R<br>K.AAIAQFDDVEVVR.H<br>R.RMFADNGWPIVIVTR.R<br>R.MLDLPTVAALDAVTDALSR.M<br>R.LLSLNQAPETSYVDDERVK.A<br>K.TPTSIYLANR.G<br>R.LLSLNQAPETSYVDDER.V<br>R.ASPGMILFTLVNGLR.S<br>R.VAASLPPETFLGAGSPWTVATYVMVAGR.G<br>R.LAPFVVDGALASLEAPR.L<br>R.SSEANLYAGPDDIYVSPNQYR.K<br>K.GEVVSTFDPATR.H<br>K.DVVILLDSITR.L<br>R.VIDLVSQPK.G<br>R.AYNTVPSGK.V<br>K.VLTGGVDANALQRPK.R<br>K.LSLDVTDPYKDK.S<br>R.TGDTVEGEIR.A<br>R.SVKGEVSTFDPATR.H<br>K.LISVFDPPDVR.H<br>K.ELAEIEEIGSGTIEVLPDSFGFLR.S<br>R.LLNQNGTVDAMEFLDK.I<br>R.HRVNFDNLTPYPNQK.L<br>R.NIEEGSLIATLIDTGSR.M<br>R.KQQLMFSILK.E<br>R.HVQVAEMVIEK.A<br>K.TVLLQNIK.A<br>K.GTGNSEIVLDR.K<br>R.WFDNLTPYPNQK.L<br>K.SPAQLVEMAEELGVEGASTMR.K<br>K.GTGNSEIVLDRK.V<br>K.VLTGGVDANALQRP.P<br>K.TKSPAQLVEMAEELGVEGASTMR.K<br>K.ATTDNHPEVYLVLDVDERPEEVTDMQR.S<br>R.KEELVEK.D<br>K.TNEDFFDSMNQ.<br>R.IFPALDVGK.S<br>K.LSLDVTDPYK.D<br>R.MDEVIFEK.G<br>K.EELVEKDK.L<br>R.ALIDTGSVSGVPTIVTQLGLR.S<br>R.IVTDVAVLAENPADLSHVIGR.A<br>R.AIVPEIFGVNAGR.Q<br>R.IPAYVARPDADSSR.A<br>R.IHDALDPHK.V<br>R.FAPGVELDDIEAELNEAFYFGQYDADDGVK.D<br>R.FAPGVELDDIEAELNEAFYFGQYDADDGVKDEAAIR.W<br>R.RNDEGAR.L<br>R.WLHSQGASK.V<br>R.QKCDWAAEGYLAIPDFWR.F<br>R.AFFAEHLA.<br>R.LAYMAAR.T<br>K.VTLHDYGLDGHFAATHGNR.R<br>K.CDDWAAEGYLAIPDFWR.F<br>R.IDLAEAGLADLAAETESQR.V<br>K.STLINALAQR.E<br>K.AAVEGADILLWLGAPK.E<br>R.AAIQTLAAEGETTVVAGEAALR.L<br>R.ALANEALLDPLDYAAGGLSR.E<br>R.LIQEQPSDGGK.W<br>R.SPLFTGAIAGAPR.Y<br>R.IAGLDLADGTALTAR.A<br>R.SESYGMVDDLVQGVTEPYR.M<br>R.LTLVPEIESIDR.A<br>R.LRADNAAR.L<br>R.AGALLEAPVATADYGAIGLPLPGDGIAR.R<br>R.TIEGLEAVEMVPGYAVEYDHIDPR.A<br>R.PATAALFAR.R<br>R.AVVLATGTLGGR.L<br>R.AILSEVVEDAHYAPYAR.H<br>.MHSSATFDVYVGGGHAGTEAAAAAAR.L<br>R.TDAESGLVGTGR.I<br>R.HIADSAQLLALDTR.E<br>R.VATRPATISAR.A<br>R.GWLTQAFAPSTEQWAQIER.F                                                                                                                                                                                                                                                                                                                                                                                                                                                                                                                                                                                                                                                                                                                                                                                                                                                                                                                                                                                                                                        |
| YP_617879 | Sala_2841 | maf protein                                            | 32.83%            | 4                       | R.QPSSLISTHTDAAAGPSPALDELLEGAPIAVGAGGAAR.A<br>K.ADALAAIAER.R<br>K.AAVMDLDDPGDIR.G<br>R.LLVNASSLGMAGPPLDLDLSPDPDAIVYDLYVSPYLR.T<br>R.GTIGAMNTIVR.Q<br>K.SPLIHGFVLDALGMEGDYRR.A<br>K.LWIRPISDAFIADYVAQWDSIR.W<br>R.NIADALAEK.A<br>R.LFSAVAAR.D<br>R.AAGLAFETTAHVDEEMLTASLR.A<br>K.TANIPVPESPPSALFNLR.R<br>K.AAIAQFDDVEVVR.H<br>R.RMFADNGWPIVIVTR.R<br>R.MLDLPTVAALDAVTDALSR.M<br>R.LLSLNQAPETSYVDDERVK.A<br>K.TPTSIYLANR.G<br>R.LLSLNQAPETSYVDDER.V<br>R.ASPGMILFTLVNGLR.S<br>R.VAASLPPETFLGAGSPWTVATYVMVAGR.G<br>R.LAPFVVDGALASLEAPR.L<br>R.SSEANLYAGPDDIYVSPNQYR.K<br>K.GEVVSTFDPATR.H<br>K.DVVILLDSITR.L<br>R.VIDLVSQPK.G<br>R.AYNTVPSGK.V<br>K.VLTGGVDANALQRPK.R<br>K.LSLDVTDPYKDK.S<br>R.TGDTVEGEIR.A<br>R.SVKGEVSTFDPATR.H<br>K.LISVFDPPDVR.H<br>K.ELAEIEEIGSGTIEVLPDSFGFLR.S<br>R.LLNQNGTVDAMEFLDK.I<br>R.HRVNFDNLTPYPNQK.L<br>R.NIEEGSLIATLIDTGSR.M<br>R.KQQLMFSILK.E<br>R.HVQVAEMVIEK.A<br>K.TVLLQNIK.A<br>K.GTGNSEIVLDR.K<br>R.WFDNLTPYPNQK.L<br>K.SPAQLVEMAEELGVEGASTMR.K<br>K.GTGNSEIVLDRK.V<br>K.VLTGGVDANALQRP.P<br>K.TKSPAQLVEMAEELGVEGASTMR.K<br>K.ATTDNHPEVYLVLDVDERPEEVTDMQR.S<br>R.KEELVEK.D<br>K.TNEDFFDSMNQ.<br>R.IFPALDVGK.S<br>K.LSLDVTDPYK.D<br>R.MDEVIFEK.G<br>K.EELVEKDK.L<br>R.ALIDTGSVSGVPTIVTQLGLR.S<br>R.IVTDVAVLAENPADLSHVIGR.A<br>R.AIVPEIFGVNAGR.Q<br>R.IPAYVARPDADSSR.A<br>R.IHDALDPHK.V<br>R.FAPGVELDDIEAELNEAFYFGQYDADDGVK.D<br>R.FAPGVELDDIEAELNEAFYFGQYDADDGVKDEAAIR.W<br>R.RNDEGAR.L<br>R.WLHSQGASK.V<br>R.QKCDWAAEGYLAIPDFWR.F<br>R.AFFAEHLA.<br>R.LAYMAAR.T<br>K.VTLHDYGLDGHFAATHGNR.R<br>K.CDDWAAEGYLAIPDFWR.F<br>R.IDLAEAGLADLAAETESQR.V<br>K.STLINALAQR.E<br>K.AAVEGADILLWLGAPK.E<br>R.AAIQTLAAEGETTVVAGEAALR.L<br>R.ALANEALLDPLDYAAGGLSR.E<br>R.LIQEQPSDGGK.W<br>R.SPLFTGAIAGAPR.Y<br>R.IAGLDLADGTALTAR.A<br>R.SESYGMVDDLVQGVTEPYR.M<br>R.LTLVPEIESIDR.A<br>R.LRADNAAR.L<br>R.AGALLEAPVATADYGAIGLPLPGDGIAR.R<br>R.TIEGLEAVEMVPGYAVEYDHIDPR.A<br>R.PATAALFAR.R<br>R.AVVLATGTLGGR.L<br>R.AILSEVVEDAHYAPYAR.H<br>.MHSSATFDVYVGGGHAGTEAAAAAAR.L<br>R.TDAESGLVGTGR.I<br>R.HIADSAQLLALDTR.E<br>R.VATRPATISAR.A<br>R.GWLTQAFAPSTEQWAQIER.F                                                                                                                                                                                                                                                                                                                                                                                                                                                                                                                                                                                                                                                                                                                                                                                                                                                                                                                                                                                                                                        |
| YP_617880 | Sala_2842 | protein of unknown function DUF299                     | 41.48%            | 8                       | R.QPSSLISTHTDAAAGPSPALDELLEGAPIAVGAGGAAR.A<br>K.ADALAAIAER.R<br>K.AAVMDLDDPGDIR.G<br>R.LLVNASSLGMAGPPLDLDLSPDPDAIVY                                                                                                                                                                                                                                                                                                                                                                                                                                                                                                                                                                                                                                                                                                                                                                                                                                                                                                                                                                                                                                                                                                                                                                                                                                                                                                                                                                                                                                                                                                                                                                                                                                                                                                                                                                                                                                                                                                                                                                                                                                                                                                                                                                                                                                                                                                                                                                                                                                                                                                                                                                                                                                                                                                                                                                                                                                                                                                                                                                                                   |



| Accession | Locus tag | Description                                                                         | Sequence coverage | No. peptides identified | List of peptides identified                                                                                                                                                                                                                                                                                                                                                                                                                                                                                                                                                                                                                                                                                                                                                                                                                                                                                                                                                                                                                                                                                                                                                                                                                                                                                                                                                                                                                                                                                                                                                                                                                                                                                                                                                                                                                                                                                                                                                                                                                                                                                                                                                                                                                                                                                                                                                                                                                                                                                                                                                                                                                                                                                                                                                                                                                                                                                                                                                                                                                                                                                                                                                                                                            |
|-----------|-----------|-------------------------------------------------------------------------------------|-------------------|-------------------------|----------------------------------------------------------------------------------------------------------------------------------------------------------------------------------------------------------------------------------------------------------------------------------------------------------------------------------------------------------------------------------------------------------------------------------------------------------------------------------------------------------------------------------------------------------------------------------------------------------------------------------------------------------------------------------------------------------------------------------------------------------------------------------------------------------------------------------------------------------------------------------------------------------------------------------------------------------------------------------------------------------------------------------------------------------------------------------------------------------------------------------------------------------------------------------------------------------------------------------------------------------------------------------------------------------------------------------------------------------------------------------------------------------------------------------------------------------------------------------------------------------------------------------------------------------------------------------------------------------------------------------------------------------------------------------------------------------------------------------------------------------------------------------------------------------------------------------------------------------------------------------------------------------------------------------------------------------------------------------------------------------------------------------------------------------------------------------------------------------------------------------------------------------------------------------------------------------------------------------------------------------------------------------------------------------------------------------------------------------------------------------------------------------------------------------------------------------------------------------------------------------------------------------------------------------------------------------------------------------------------------------------------------------------------------------------------------------------------------------------------------------------------------------------------------------------------------------------------------------------------------------------------------------------------------------------------------------------------------------------------------------------------------------------------------------------------------------------------------------------------------------------------------------------------------------------------------------------------------------------|
| YP_617894 | Sala_2856 | Cobyrinic acid a,c-diamide synthase                                                 | 34.62%            | 7                       | R.AVVAEALDHEVEAEPLER.V<br>K.QNLLAASTIPAIWAR.H<br>R.TLIDLDPPGNASTGLGK.Q<br>R.LTDQVSDVREVLGPVFDVTPR.N<br>K.TITAINLATALAATGW.T<br>R.LSEAPSHGLPALIDYHR.C<br>R.EVLGPVFDVTPR.N<br>K.LSILGVALTMFDR.R                                                                                                                                                                                                                                                                                                                                                                                                                                                                                                                                                                                                                                                                                                                                                                                                                                                                                                                                                                                                                                                                                                                                                                                                                                                                                                                                                                                                                                                                                                                                                                                                                                                                                                                                                                                                                                                                                                                                                                                                                                                                                                                                                                                                                                                                                                                                                                                                                                                                                                                                                                                                                                                                                                                                                                                                                                                                                                                                                                                                                                          |
| YP_617895 | Sala_2857 | parB-like partition proteins                                                        | 55.80%            | 11                      | R.LTDQVSDVRE.E<br>R.LIEDFGHNEALAK.L<br>R.ELDDAATYEIALVENIQR.Q<br>R.ALIGADDPEAIAR.R<br>R.GLNALFGDVAVEAPVLPATPGGAAR.A<br>R.AAPVAGDAVQHVIAVGAIPLPGQPR.R<br>K.SIDVGGRRDPDVAVER.H<br>R.AGLHQPALVR.E<br>R.SPDGEGFQLVAGER.R<br>R.RSPDGEFQLVAGER.R<br>R.RHFDEAIAELADSIGSR.G<br>R.LLDPQAVQALVGDGSLAMGHAR.A<br>R.VPEGTPPGEYR.A<br>R.AVPDAVAATAAPK.P<br>R.YTEBEIQQGTTIDEAER.V<br>R.SVYGDIEVTRPGVAEPLLVAR.G<br>R.VDGLGAEAAIGK.A<br>R.GTEVVLNIGAEPATYR.I<br>K.PASAGVSIALTPYGITIPVIVR.V<br>R.MTAAGGLAEAEADANDVER.A<br>R.GJAVYPEVAGR.Q<br>R.AALSMIAFSFR.R<br>K.AWVSEDEGAANFDLTR.T<br>R.IAPETVNLVDSR.A<br>R.TAALIDTLPVGEAFDWVEK.V<br>R.VAELQTLTISEMQK.R<br>R.LTAWSDALGDIESFNTLEER.Q<br>R.HLAGVYGIHR.C<br>R.AGADPVATHVDAR.V<br>R.PAATPAAATPPVVRPQNNALIGSSVDVGR.M<br>R.FDVVAIGNAIVDLVAR.A<br>R.ALAETQDPEAAAR.I<br>R.ADDALIEAELTK.G<br>R.ALGVAYETPAK.D<br>R.GSHGALAIQGGVR.T<br>R.ALGVAYETPAKDGAPTAR.C<br>R.LIDGAEAEER.L<br>R.TEVPPEIETVDDTTGAGDLFAAGFLSGLAERG.P<br>K.VAFTLSDAFIIEH.H<br>R.EIIAQVGR.A<br>R.LYAMGPAIEMSGGSAANTLAGMAALGER.C<br>R.TMNTFLGASHLLDR.V<br>R.KVAFTLSDAFIIEH.H<br>R.IAPQVLLVTR.G<br>R.TMNTFLGASHLLDR.V<br>R.CAFIQVADDQLGAVFTHDLR.A<br>R.ALIAEGLDFILFANEVEIR.A<br>R.NAPLAADAIEWGRTR.R<br>R.ASPQDADTVLAK.G<br>K.TSFEPLGPVTR.N<br>R.TAEGAFAPVAIAAAR.A<br>R.NFVIGGVAAGTALAQLLAADGAPVR.L<br>R.NFALGQQLGR.G<br>R.VADAIQALLSR.P<br>R.EADVVAIAEAHR.N<br>K.AETLAGLAGLDLVLTCTSANR.N<br>R.VAGQEAERHPYGGVPEIAAR.A<br>R.WPLDPAEAER.G<br>R.JAEGDPHAPVLPRLVGSAPHFVAGL.K.S<br>K.LLGLGYPGPAVER.I<br>R.LATTIDDAAGEAFDK.T<br>R.IAEGDPHAPVLP.P<br>R.LATTIDDAAGEAFDK.TAK.L<br>R.AFVAVGVAANGAIR.T<br>K.ALAHAANKPLJAVNHLEGHLSR.L<br>K.LAAGEADATLLAAGLER.L<br>R.LDAEIFSEGDHAGHVIVTDAGVVAALGHR.L<br>R.ELDAALDAGTIDVAVHSLKDVETLR.D<br>R.LRPLDVLTR.G<br>R.ADDAANTALLAEDHAPTHR.A<br>R.SPVAAYAEWQADGVL.R<br>R.EGIAAQKISELPHGAR.L<br>K.ISELPHGAR.L<br>R.LAGPGLGALASPAYAVGPATAEAR.A<br>R.GHLSVAISAAVAQAAGAWR.V<br>K.TIDTSRDPVTLER.Q.R.T<br>R.TQLDALAPQLVGR.S<br>R.ITLQAESASGNAR.A<br>K.AAEGAPLVIAPVDGAGALAAAR.V<br>R.GLSGLYLDQQLR.L<br>R.WLTDASAPAAR.T<br>R.FSDDDQNAVK.T<br>R.AEGLVAVAVR.R<br>R.ALDLIETAILEPR.D<br>R.LRFQDDQNAVK.T<br>R.ELGELFVVR.A<br>K.AGVDPILLIAGDAVK.A<br>R.VIAGQADK.A<br>R.SSEGSGLWTGLR.R<br>R.RALDLIETAILEPR.D<br>K.AIAEVEAMPGVDAAGEWLIDAR.R<br>R.RVLAAGQADK.A<br>R.DSPAALAEK.T<br>R.IEALDPLDPLALDQLSEER.M<br>R.LGLGATIDPEYGGAGLNYSYGLIAR.E<br>K.MWITNSPIADVFWVAK.S<br>K.LANMLTEIALGTQALR.V<br>R.ASVTGEIVMDGVEGEDALLPHVSGLK.G<br>R.LIDEGHLAPDMISFLK.R<br>R.PLANQVQLK.L<br>K.QFRPLAANQVQLK.L<br>R.VTSAFLDER.F<br>R.SYAESELLPR.V<br>R.HAVNLETVNTYEGTHDVHALLGR.A<br>R.FDREIMSEMGR.L<br>R.DMHGNGISADYHVIR.H<br>R.LIDEGHLAPDMISFLK.N<br>R.SACSVQSSLVHPINAYGSEEQKR.N<br>R.DVTGSAGHIDMALLDSQAVLANQAANFLASGVAPK.R<br>R.LANRDELIPLLAAK.I<br>R.ALLADADVNIENYK.V<br>K.AGLAYADIFTGLYSAVAVLAALR.R<br>R.LIPSLATGAPLDNWFDR.G<br>R.LIIVPVAITAVSGDALAK.A<br>R.GTVELGGYGEPLIR.I<br>K.TSGYTFIVDPVTGVPALGANGLPR.S<br>R.GTNSTLSAFIR.G<br>K.EYNTNIGGVPDVAVER.E<br>R.SALGTEGLTAFVGNPR.Q<br>K.AGAIIDTIGATTNWTLEASR.G<br>R.VSLQVQPTSDHNFYASYSGFK.G<br>R.GVGNVPAIAPGSPDAAVASFLPEQVDSYEVGYK.G<br>K.YVTKPLQEFSLR.I<br>K.WTASGTLAYSTPVGDGEIR.F<br>R.QNYLGGSPVFGAGVFPAPSTNFDGSR.K<br>R.GPGTLYGR.N<br>R.LTLSTALGYDAQYK.E<br>R.GGFGDNLNGLNENKDVWAGR.G<br>R.GGFGDNLNGLNENYK.D |
| YP_617903 | Sala_2865 | Linalool 8-monooxygenase                                                            | 18.42%            | 5                       | R.VPEGTPPGEYR.A<br>R.AVPDAVAATAAPK.P<br>R.YTEBEIQQGTTIDEAER.V<br>R.SVYGDIEVTRPGVAEPLLVAR.G<br>R.VDGLGAEAAIGK.A<br>R.GTEVVLNIGAEPATYR.I<br>K.PASAGVSIALTPYGITIPVIVR.V<br>R.MTAAGGLAEAEADANDVER.A<br>R.GJAVYPEVAGR.Q<br>R.AALSMIAFSFR.R<br>K.AWVSEDEGAANFDLTR.T<br>R.IAPETVNLVDSR.A<br>R.TAALIDTLPVGEAFDWVEK.V<br>R.VAELQTLTISEMQK.R<br>R.LTAWSDALGDIESFNTLEER.Q<br>R.HLAGVYGIHR.C<br>R.AGADPVATHVDAR.V<br>R.PAATPAAATPPVVRPQNNALIGSSVDVGR.M<br>R.FDVVAIGNAIVDLVAR.A<br>R.ALAETQDPEAAAR.I<br>R.ADDALIEAELTK.G<br>R.ALGVAYETPAK.D<br>R.GSHGALAIQGGVR.T<br>R.ALGVAYETPAKDGAPTAR.C<br>R.LIDGAEAEER.L<br>R.TEVPPEIETVDDTTGAGDLFAAGFLSGLAERG.P<br>K.VAFTLSDAFIIEH.H<br>R.EIIAQVGR.A<br>R.LYAMGPAIEMSGGSAANTLAGMAALGER.C<br>R.TMNTFLGASHLLDR.V<br>R.KVAFTLSDAFIIEH.H<br>R.IAPQVLLVTR.G<br>R.TMNTFLGASHLLDR.V<br>R.CAFIQVADDQLGAVFTHDLR.A<br>R.ALIAEGLDFILFANEVEIR.A<br>R.NAPLAADAIEWGRTR.R<br>R.ASPQDADTVLAK.G<br>K.TSFEPLGPVTR.N<br>R.TAEGAFAPVAIAAAR.A<br>R.NFVIGGVAAGTALAQLLAADGAPVR.L<br>R.NFALGQQLGR.G<br>R.VADAIQALLSR.P<br>R.EADVVAIAEAHR.N<br>K.AETLAGLAGLDLVLTCTSANR.N<br>R.VAGQEAERHPYGGVPEIAAR.A<br>R.WPLDPAEAER.G<br>R.JAEGDPHAPVLPRLVGSAPHFVAGL.K.S<br>K.LLGLGYPGPAVER.I<br>R.LATTIDDAAGEAFDK.T<br>R.IAEGDPHAPVLP.P<br>R.LATTIDDAAGEAFDK.TAK.L<br>R.AFVAVGVAANGAIR.T<br>K.ALAHAANKPLJAVNHLEGHLSR.L<br>K.LAAGEADATLLAAGLER.L<br>R.LDAEIFSEGDHAGHVIVTDAGVVAALGHR.L<br>R.ELDAALDAGTIDVAVHSLKDVETLR.D<br>R.LRPLDVLTR.G<br>R.ADDAANTALLAEDHAPTHR.A<br>R.SPVAAYAEWQADGVL.R<br>R.EGIAAQKISELPHGAR.L<br>K.ISELPHGAR.L<br>R.LAGPGLGALASPAYAVGPATAEAR.A<br>R.GHLSVAISAAVAQAAGAWR.V<br>K.TIDTSRDPVTLER.Q.R.T<br>R.TQLDALAPQLVGR.S<br>R.ITLQAESASGNAR.A<br>K.AAEGAPLVIAPVDGAGALAAAR.V<br>R.GLSGLYLDQQLR.L<br>R.WLTDASAPAAR.T<br>R.FSDDDQNAVK.T<br>R.AEGLVAVAVR.R<br>R.ALDLIETAILEPR.D<br>R.LRFQDDQNAVK.T<br>R.ELGELFVVR.A<br>K.AGVDPILLIAGDAVK.A<br>R.VIAGQADK.A<br>R.SSEGSGLWTGLR.R<br>R.RALDLIETAILEPR.D<br>K.AIAEVEAMPGVDAAGEWLIDAR.R<br>R.RVLAAGQADK.A<br>R.DSPAALAEK.T<br>R.IEALDPLDPLALDQLSEER.M<br>R.LGLGATIDPEYGGAGLNYSYGLIAR.E<br>K.MWITNSPIADVFWVAK.S<br>K.LANMLTEIALGTQALR.V<br>R.ASVTGEIVMDGVEGEDALLPHVSGLK.G<br>R.LIDEGHLAPDMISFLK.R<br>R.PLANQVQLK.L<br>K.QFRPLAANQVQLK.L<br>R.VTSAFLDER.F<br>R.SYAESELLPR.V<br>R.HAVNLETVNTYEGTHDVHALLGR.A<br>R.FDREIMSEMGR.L<br>R.DMHGNGISADYHVIR.H<br>R.LIDEGHLAPDMISFLK.N<br>R.SACSVQSSLVHPINAYGSEEQKR.N<br>R.DVTGSAGHIDMALLDSQAVLANQAANFLASGVAPK.R<br>R.LANRDELIPLLAAK.I<br>R.ALLADADVNIENYK.V<br>K.AGLAYADIFTGLYSAVAVLAALR.R<br>R.LIPSLATGAPLDNWFDR.G<br>R.LIIVPVAITAVSGDALAK.A<br>R.GTVELGGYGEPLIR.I<br>K.TSGYTFIVDPVTGVPALGANGLPR.S<br>R.GTNSTLSAFIR.G<br>K.EYNTNIGGVPDVAVER.E<br>R.SALGTEGLTAFVGNPR.Q<br>K.AGAIIDTIGATTNWTLEASR.G<br>R.VSLQVQPTSDHNFYASYSGFK.G<br>R.GVGNVPAIAPGSPDAAVASFLPEQVDSYEVGYK.G<br>K.YVTKPLQEFSLR.I<br>K.WTASGTLAYSTPVGDGEIR.F<br>R.QNYLGGSPVFGAGVFPAPSTNFDGSR.K<br>R.GPGTLYGR.N<br>R.LTLSTALGYDAQYK.E<br>R.GGFGDNLNGLNENKDVWAGR.G<br>R.GGFGDNLNGLNENYK.D                                                                                                                                                                                                                                                                                                      |
| YP_617908 | Sala_2870 | hypothetical protein                                                                | 36.29%            | 2                       | R.VPEGTPPGEYR.A<br>R.AVPDAVAATAAPK.P<br>R.YTEBEIQQGTTIDEAER.V<br>R.SVYGDIEVTRPGVAEPLLVAR.G<br>R.VDGLGAEAAIGK.A<br>R.GTEVVLNIGAEPATYR.I<br>K.PASAGVSIALTPYGITIPVIVR.V<br>R.MTAAGGLAEAEADANDVER.A<br>R.GJAVYPEVAGR.Q<br>R.AALSMIAFSFR.R<br>K.AWVSEDEGAANFDLTR.T<br>R.IAPETVNLVDSR.A<br>R.TAALIDTLPVGEAFDWVEK.V<br>R.VAELQTLTISEMQK.R<br>R.LTAWSDALGDIESFNTLEER.Q<br>R.HLAGVYGIHR.C<br>R.AGADPVATHVDAR.V<br>R.PAATPAAATPPVVRPQNNALIGSSVDVGR.M<br>R.FDVVAIGNAIVDLVAR.A<br>R.ALAETQDPEAAAR.I<br>R.ADDALIEAELTK.G<br>R.ALGVAYETPAK.D<br>R.GSHGALAIQGGVR.T<br>R.ALGVAYETPAKDGAPTAR.C<br>R.LIDGAEAEER.L<br>R.TEVPPEIETVDDTTGAGDLFAAGFLSGLAERG.P<br>K.VAFTLSDAFIIEH.H<br>R.EIIAQVGR.A<br>R.LYAMGPAIEMSGGSAANTLAGMAALGER.C<br>R.TMNTFLGASHLLDR.V<br>R.KVAFTLSDAFIIEH.H<br>R.IAPQVLLVTR.G<br>R.TMNTFLGASHLLDR.V<br>R.CAFIQVADDQLGAVFTHDLR.A<br>R.ALIAEGLDFILFANEVEIR.A<br>R.NAPLAADAIEWGRTR.R<br>R.ASPQDADTVLAK.G<br>K.TSFEPLGPVTR.N<br>R.TAEGAFAPVAIAAAR.A<br>R.NFVIGGVAAGTALAQLLAADGAPVR.L<br>R.NFALGQQLGR.G<br>R.VADAIQALLSR.P<br>R.EADVVAIAEAHR.N<br>K.AETLAGLAGLDLVLTCTSANR.N<br>R.VAGQEAERHPYGGVPEIAAR.A<br>R.WPLDPAEAER.G<br>R.JAEGDPHAPVLPRLVGSAPHFVAGL.K.S<br>K.LLGLGYPGPAVER.I<br>R.LATTIDDAAGEAFDK.T<br>R.IAEGDPHAPVLP.P<br>R.LATTIDDAAGEAFDK.TAK.L<br>R.AFVAVGVAANGAIR.T<br>K.ALAHAANKPLJAVNHLEGHLSR.L<br>K.LAAGEADATLLAAGLER.L<br>R.LDAEIFSEGDHAGHVIVTDAGVVAALGHR.L<br>R.ELDAALDAGTIDVAVHSLKDVETLR.D<br>R.LRPLDVLTR.G<br>R.ADDAANTALLAEDHAPTHR.A<br>R.SPVAAYAEWQADGVL.R<br>R.EGIAAQKISELPHGAR.L<br>K.ISELPHGAR.L<br>R.LAGPGLGALASPAYAVGPATAEAR.A<br>R.GHLSVAISAAVAQAAGAWR.V<br>K.TIDTSRDPVTLER.Q.R.T<br>R.TQLDALAPQLVGR.S<br>R.ITLQAESASGNAR.A<br>K.AAEGAPLVIAPVDGAGALAAAR.V<br>R.GLSGLYLDQQLR.L<br>R.WLTDASAPAAR.T<br>R.FSDDDQNAVK.T<br>R.AEGLVAVAVR.R<br>R.ALDLIETAILEPR.D<br>R.LRFQDDQNAVK.T<br>R.ELGELFVVR.A<br>K.AGVDPILLIAGDAVK.A<br>R.VIAGQADK.A<br>R.SSEGSGLWTGLR.R<br>R.RALDLIETAILEPR.D<br>K.AIAEVEAMPGVDAAGEWLIDAR.R<br>R.RVLAAGQADK.A<br>R.DSPAALAEK.T<br>R.IEALDPLDPLALDQLSEER.M<br>R.LGLGATIDPEYGGAGLNYSYGLIAR.E<br>K.MWITNSPIADVFWVAK.S<br>K.LANMLTEIALGTQALR.V<br>R.ASVTGEIVMDGVEGEDALLPHVSGLK.G<br>R.LIDEGHLAPDMISFLK.R<br>R.PLANQVQLK.L<br>K.QFRPLAANQVQLK.L<br>R.VTSAFLDER.F<br>R.SYAESELLPR.V<br>R.HAVNLETVNTYEGTHDVHALLGR.A<br>R.FDREIMSEMGR.L<br>R.DMHGNGISADYHVIR.H<br>R.LIDEGHLAPDMISFLK.N<br>R.SACSVQSSLVHPINAYGSEEQKR.N<br>R.DVTGSAGHIDMALLDSQAVLANQAANFLASGVAPK.R<br>R.LANRDELIPLLAAK.I<br>R.ALLADADVNIENYK.V<br>K.AGLAYADIFTGLYSAVAVLAALR.R<br>R.LIPSLATGAPLDNWFDR.G<br>R.LIIVPVAITAVSGDALAK.A<br>R.GTVELGGYGEPLIR.I<br>K.TSGYTFIVDPVTGVPALGANGLPR.S<br>R.GTNSTLSAFIR.G<br>K.EYNTNIGGVPDVAVER.E<br>R.SALGTEGLTAFVGNPR.Q<br>K.AGAIIDTIGATTNWTLEASR.G<br>R.VSLQVQPTSDHNFYASYSGFK.G<br>R.GVGNVPAIAPGSPDAAVASFLPEQVDSYEVGYK.G<br>K.YVTKPLQEFSLR.I<br>K.WTASGTLAYSTPVGDGEIR.F<br>R.QNYLGGSPVFGAGVFPAPSTNFDGSR.K<br>R.GPGTLYGR.N<br>R.LTLSTALGYDAQYK.E<br>R.GGFGDNLNGLNENKDVWAGR.G<br>R.GGFGDNLNGLNENYK.D                                                                                                                                                                                                                                                                                                      |
| YP_617910 | Sala_2872 | PfkB                                                                                | 70.78%            | 17                      | R.VPEGTPPGEYR.A<br>R.AVPDAVAATAAPK.P<br>R.YTEBEIQQGTTIDEAER.V<br>R.SVYGDIEVTRPGVAEPLLVAR.G<br>R.VDGLGAEAAIGK.A<br>R.GTEVVLNIGAEPATYR.I<br>K.PASAGVSIALTPYGITIPVIVR.V<br>R.MTAAGGLAEAEADANDVER.A<br>R.GJAVYPEVAGR.Q<br>R.AALSMIAFSFR.R<br>K.AWVSEDEGAANFDLTR.T<br>R.IAPETVNLVDSR.A<br>R.TAALIDTLPVGEAFDWVEK.V<br>R.VAELQTLTISEMQK.R<br>R.LTAWSDALGDIESFNTLEER.Q<br>R.HLAGVYGIHR.C<br>R.AGADPVATHVDAR.V<br>R.PAATPAAATPPVVRPQNNALIGSSVDVGR.M<br>R.FDVVAIGNAIVDLVAR.A<br>R.ALAETQDPEAAAR.I<br>R.ADDALIEAELTK.G<br>R.ALGVAYETPAK.D<br>R.GSHGALAIQGGVR.T<br>R.ALGVAYETPAKDGAPTAR.C<br>R.LIDGAEAEER.L<br>R.TEVPPEIETVDDTTGAGDLFAAGFLSGLAERG.P<br>K.VAFTLSDAFIIEH.H<br>R.EIIAQVGR.A<br>R.LYAMGPAIEMSGGSAANTLAGMAALGER.C<br>R.TMNTFLGASHLLDR.V<br>R.KVAFTLSDAFIIEH.H<br>R.IAPQVLLVTR.G<br>R.TMNTFLGASHLLDR.V<br>R.CAFIQVADDQLGAVFTHDLR.A<br>R.ALIAEGLDFILFANEVEIR.A<br>R.NAPLAADAIEWGRTR.R<br>R.ASPQDADTVLAK.G<br>K.TSFEPLGPVTR.N<br>R.TAEGAFAPVAIAAAR.A<br>R.NFVIGGVAAGTALAQLLAADGAPVR.L<br>R.NFALGQQLGR.G<br>R.VADAIQALLSR.P<br>R.EADVVAIAEAHR.N<br>K.AETLAGLAGLDLVLTCTSANR.N<br>R.VAGQEAERHPYGGVPEIAAR.A<br>R.WPLDPAEAER.G<br>R.JAEGDPHAPVLPRLVGSAPHFVAGL.K.S<br>K.LLGLGYPGPAVER.I<br>R.LATTIDDAAGEAFDK.T<br>R.IAEGDPHAPVLP.P<br>R.LATTIDDAAGEAFDK.TAK.L<br>R.AFVAVGVAANGAIR.T<br>K.ALAHAANKPLJAVNHLEGHLSR.L<br>K.LAAGEADATLLAAGLER.L<br>R.LDAEIFSEGDHAGHVIVTDAGVVAALGHR.L<br>R.ELDAALDAGTIDVAVHSLKDVETLR.D<br>R.LRPLDVLTR.G<br>R.ADDAANTALLAEDHAPTHR.A<br>R.SPVAAYAEWQADGVL.R<br>R.EGIAAQKISELPHGAR.L<br>K.ISELPHGAR.L<br>R.LAGPGLGALASPAYAVGPATAEAR.A<br>R.GHLSVAISAAVAQAAGAWR.V<br>K.TIDTSRDPVTLER.Q.R.T<br>R.TQLDALAPQLVGR.S<br>R.ITLQAESASGNAR.A<br>K.AAEGAPLVIAPVDGAGALAAAR.V<br>R.GLSGLYLDQQLR.L<br>R.WLTDASAPAAR.T<br>R.FSDDDQNAVK.T<br>R.AEGLVAVAVR.R<br>R.ALDLIETAILEPR.D<br>R.LRFQDDQNAVK.T<br>R.ELGELFVVR.A<br>K.AGVDPILLIAGDAVK.A<br>R.VIAGQADK.A<br>R.SSEGSGLWTGLR.R<br>R.RALDLIETAILEPR.D<br>K.AIAEVEAMPGVDAAGEWLIDAR.R<br>R.RVLAAGQADK.A<br>R.DSPAALAEK.T<br>R.IEALDPLDPLALDQLSEER.M<br>R.LGLGATIDPEYGGAGLNYSYGLIAR.E<br>K.MWITNSPIADVFWVAK.S<br>K.LANMLTEIALGTQALR.V<br>R.ASVTGEIVMDGVEGEDALLPHVSGLK.G<br>R.LIDEGHLAPDMISFLK.R<br>R.PLANQVQLK.L<br>K.QFRPLAANQVQLK.L<br>R.VTSAFLDER.F<br>R.SYAESELLPR.V<br>R.HAVNLETVNTYEGTHDVHALLGR.A<br>R.FDREIMSEMGR.L<br>R.DMHGNGISADYHVIR.H<br>R.LIDEGHLAPDMISFLK.N<br>R.SACSVQSSLVHPINAYGSEEQKR.N<br>R.DVTGSAGHIDMALLDSQAVLANQAANFLASGVAPK.R<br>R.LANRDELIPLLAAK.I<br>R.ALLADADVNIENYK.V<br>K.AGLAYADIFTGLYSAVAVLAALR.R<br>R.LIPSLATGAPLDNWFDR.G<br>R.LIIVPVAITAVSGDALAK.A<br>R.GTVELGGYGEPLIR.I<br>K.TSGYTFIVDPVTGVPALGANGLPR.S<br>R.GTNSTLSAFIR.G<br>K.EYNTNIGGVPDVAVER.E<br>R.SALGTEGLTAFVGNPR.Q<br>K.AGAIIDTIGATTNWTLEASR.G<br>R.VSLQVQPTSDHNFYASYSGFK.G<br>R.GVGNVPAIAPGSPDAAVASFLPEQVDSYEVGYK.G<br>K.YVTKPLQEFSLR.I<br>K.WTASGTLAYSTPVGDGEIR.F<br>R.QNYLGGSPVFGAGVFPAPSTNFDGSR.K<br>R.GPGTLYGR.N<br>R.LTLSTALGYDAQYK.E<br>R.GGFGDNLNGLNENKDVWAGR.G<br>R.GGFGDNLNGLNENYK.D                                                                                                                                                                                                                                                                                                      |
| YP_617911 | Sala_2873 | Membrane protein involved in the export of O-antigen and teichoic acid-like protein | 8.07%             | 3                       | R.VPEGTPPGEYR.A<br>R.AVPDAVAATAAPK.P<br>R.YTEBEIQQGTTIDEAER.V<br>R.SVYGDIEVTRPGVAEPLLVAR.G<br>R.VDGLGAEAAIGK.A<br>R.GTEVVLNIGAEPATYR.I<br>K.PASAGVSIALTPYGITIPVIVR.V<br>R.MTAAGGLAEAEADANDVER.A<br>R.GJAVYPEVAGR.Q<br>R.AALSMIAFSFR.R<br>K.AWVSEDEGAANFDLTR.T<br>R.IAPETVNLVDSR.A<br>R.TAALIDTLPVGEAFDWVEK.V<br>R.VAELQTLTISEMQK.R<br>R.LTAWSDALGDIESFNTLEER.Q<br>R.HLAGVYGIHR.C<br>R.AGADPVATHVDAR.V<br>R.PAATPAAATPPVVRPQNNALIGSSVDVGR.M<br>R.FDVVAIGNAIVDLVAR.A<br>R.ALAETQDPEAAAR.I<br>R.ADDALIEAELTK.G<br>R.ALGVAYETPAK.D<br>R.GSHGALAIQGGVR.T<br>R.ALGVAYETPAKDGAPTAR.C<br>R.LIDGAEAEER.L<br>R.TEVPPEIETVDDTTGAGDLFAAGFLSGLAERG.P<br>K.VAFTLSDAFIIEH.H<br>R.EIIAQVGR.A<br>R.LYAMGPAIEMSGGSAANTLAGMAALGER.C<br>R.TMNTFLGASHLLDR.V<br>R.KVAFTLSDAFIIEH.H<br>R.IAPQVLLVTR.G<br>R.TMNTFLGASHLLDR.V<br>R.CAFIQVADDQLGAVFTHDLR.A<br>R.ALIAEGLDFILFANEVEIR.A<br>R.NAPLAADAIEWGRTR.R<br>R.ASPQDADTVLAK.G<br>K.TSFEPLGPVTR.N<br>R.TAEGAFAPVAIAAAR.A<br>R.NFVIGGVAAGTALAQLLAADGAPVR.L<br>R.NFALGQQLGR.G<br>R.VADAIQALLSR.P<br>R.EADVVAIAEAHR.N<br>K.AETLAGLAGLDLVLTCTSANR.N<br>R.VAGQEAERHPYGGVPEIAAR.A<br>R.WPLDPAEAER.G<br>R.JAEGDPHAPVLPRLVGSAPHFVAGL.K.S<br>K.LLGLGYPGPAVER.I<br>R.LATTIDDAAGEAFDK.T<br>R.IAEGDPHAPVLP.P<br>R.LATTIDDAAGEAFDK.TAK.L<br>R.AFVAVGVAANGAIR.T<br>K.ALAHAANKPLJAVNHLEGHLSR.L<br>K.LAAGEADATLLAAGLER.L<br>R.LDAEIFSEGDHAGHVIVTDAGVVAALGHR.L<br>R.ELDAALDAGTIDVAVHSLKDVETLR.D<br>R.LRPLDVLTR.G<br>R.ADDAANTALLAEDHAPTHR.A<br>R.SPVAAYAEWQADGVL.R<br>R.EGIAAQKISELPHGAR.L<br>K.ISELPHGAR.L<br>R.LAGPGLGALASPAYAVGPATAEAR.A<br>R.GHLSVAISAAVAQAAGAWR.V<br>K.TIDTSRDPVTLER.Q.R.T<br>R.TQLDALAPQLVGR.S<br>R.ITLQAESASGNAR.A<br>K.AAEGAPLVIAPVDGAGALAAAR.V<br>R.GLSGLYLDQQLR.L<br>R.WLTDASAPAAR.T<br>R.FSDDDQNAVK.T<br>R.AEGLVAVAVR.R<br>R.ALDLIETAILEPR.D<br>R.LRFQDDQNAVK.T<br>R.ELGELFVVR.A<br>K.AGVDPILLIAGDAVK.A<br>R.VIAGQADK.A<br>R.SSEGSGLWTGLR.R<br>R.RALDLIETAILEPR.D<br>K.AIAEVEAMPGVDAAGEWLIDAR.R<br>R.RVLAAGQADK.A<br>R.DSPAALAEK.T<br>R.IEALDPLDPLALDQLSEER.M<br>R.LGLGATIDPEYGGAGLNYSYGLIAR.E<br>K.MWITNSPIADVFWVAK.S<br>K.LANMLTEIALGTQALR.V<br>R.ASVTGEIVMDGVEGEDALLPHVSGLK.G<br>R.LIDEGHLAPDMISFLK.R<br>R.PLANQVQLK.L<br>K.QFRPLAANQVQLK.L<br>R.VTSAFLDER.F<br>R.SYAESELLPR.V<br>R.HAVNLETVNTYEGTHDVHALLGR.A<br>R.FDREIMSEMGR.L<br>R.DMHGNGISADYHVIR.H<br>R.LIDEGHLAPDMISFLK.N<br>R.SACSVQSSLVHPINAYGSEEQKR.N<br>R.DVTGSAGHIDMALLDSQAVLANQAANFLASGVAPK.R<br>R.LANRDELIPLLAAK.I<br>R.ALLADADVNIENYK.V<br>K.AGLAYADIFTGLYSAVAVLAALR.R<br>R.LIPSLATGAPLDNWFDR.G<br>R.LIIVPVAITAVSGDALAK.A<br>R.GTVELGGYGEPLIR.I<br>K.TSGYTFIVDPVTGVPALGANGLPR.S<br>R.GTNSTLSAFIR.G<br>K.EYNTNIGGVPDVAVER.E<br>R.SALGTEGLTAFVGNPR.Q<br>K.AGAIIDTIGATTNWTLEASR.G<br>R.VSLQVQPTSDHNFYASYSGFK.G<br>R.GVGNVPAIAPGSPDAAVASFLPEQVDSYEVGYK.G<br>K.YVTKPLQEFSLR.I<br>K.WTASGTLAYSTPVGDGEIR.F<br>R.QNYLGGSPVFGAGVFPAPSTNFDGSR.K<br>R.GPGTLYGR.N<br>R.LTLSTALGYDAQYK.E<br>R.GGFGDNLNGLNENKDVWAGR.G<br>R.GGFGDNLNGLNENYK.D                                                                                                                                                                                                                                                                                                      |
| YP_617912 | Sala_2874 | Glycerol-3-phosphate dehydrogenase (NAD(P)+)                                        | 30.30%            | 6                       | R.VPEGTPPGEYR.A<br>R.AVPDAVAATAAPK.P<br>R.YTEBEIQQGTTIDEAER.V<br>R.SVYGDIEVTRPGVAEPLLVAR.G<br>R.VDGLGAEAAIGK.A<br>R.GTEVVLNIGAEPATYR.I<br>K.PASAGVSIALTPYGITIPVIVR.V<br>R.MTAAGGLAEAEADANDVER.A<br>R.GJAVYPEVAGR.Q<br>R.AALSMIAFSFR.R<br>K.AWVSEDEGAANFDLTR.T<br>R.IAPETVNLVDSR.A<br>R.TAALIDTLPVGEAFDWVEK.V<br>R.VAELQTLTISEMQK.R<br>R.LTAWSDALGDIESFNTLEER.Q<br>R.HLAGVYGIHR.C<br>R.AGADPVATHVDAR.V<br>R.PAATPAAATPPVVRPQNNALIGSSVDVGR.M<br>R.FDVVAIGNAIVDLVAR.A<br>R.ALAETQDPEAAAR.I<br>R.ADDALIEAELTK.G<br>R.ALGVAYETPAK.D<br>R.GSHGALAIQGGVR.T<br>R.ALGVAYETPAKDGAPTAR.C<br>R.LIDGAEAEER.L<br>R.TEVPPEIETVDDTTGAGDLFAAGFLSGLAERG.P<br>K.VAFTLSDAFIIEH.H<br>R.EIIAQVGR.A<br>R.LYAMGPAIEMSGGSAANTLAGMAALGER.C<br>R.TMNTFLGASHLLDR.V<br>R.KVAFTLSDAFIIEH.H<br>R.IAPQVLLVTR.G<br>R.TMNTFLGASHLLDR.V<br>R.CAFIQVADDQLGAVFTHDLR.A<br>R.ALIAEGLDFILFANEVEIR.A<br>R.NAPLAADAIEWGRTR.R<br>R.ASPQDADTVLAK.G<br>K.TSFEPLGPVTR.N<br>R.TAEGAFAPVAIAAAR.A<br>R.NFVIGGVAAGTALAQLLAADGAPVR.L<br>R.NFALGQQLGR.G<br>R.VADAIQALLSR.P<br>R.EADVVAIAEAHR.N<br>K.AETLAGLAGLDLVLTCTSANR.N<br>R.VAGQEAERHPYGGVPEIAAR.A<br>R.WPLDPAEAER.G<br>R.JAEGDPHAPVLPRLVGSAPHFVAGL.K.S<br>K.LLGLGYPGPAVER.I<br>R.LATTIDDAAGEAFDK.T<br>R.IAEGDPHAPVLP.P<br>R.LATTIDDAAGEAFDK.TAK.L<br>R.AFVAVGVAANGAIR.T<br>K.ALAHAANKPLJAVNHLEGHLSR.L<br>K.LAAGEADATLLAAGLER.L<br>R.LDAEIFSEGDHAGHVIVTDAGVVAALGHR.L<br>R.ELDAALDAGTIDVAVHSLKDVETLR.D<br>R.LRPLDVLTR.G<br>R.ADDAANTALLAEDHAPTHR.A<br>R.SPVAAYAEWQADGVL.R<br>R.EGIAAQKISELPHGAR.L<br>K.ISELPHGAR.L<br>R.LAGPGLGALASPAYAVGPATAEAR.A<br>R.GHLSVAISAAVAQAAGAWR.V<br>K.TIDTSRDPVTLER.Q.R.T<br>R.TQLDALAPQLVGR.S<br>R.ITLQAESASGNAR.A<br>K.AAEGAPLVIAPVDGAGALAAAR.V<br>R.GLSGLYLDQQLR.L<br>R.WLTDASAPAAR.T<br>R.FSDDDQNAVK.T<br>R.AEGLVAVAVR.R<br>R.ALDLIETAILEPR.D<br>R.LRFQDDQNAVK.T<br>R.ELGELFVVR.A<br>K.AGVDPILLIAGDAVK.A<br>R.VIAGQADK.A<br>R.SSEGSGLWTGLR.R<br>R.RALDLIETAILEPR.D<br>K.AIAEVEAMPGVDAAGEWLIDAR.R<br>R.RVLAAGQADK.A<br>R.DSPAALAEK.T<br>R.IEALDPLDPLALDQLSEER.M<br>R.LGLGATIDPEYGGAGLNYSYGLIAR.E<br>K.MWITNSPIADVFWVAK.S<br>K.LANMLTEIALGTQALR.V<br>R.ASVTGEIVMDGVEGEDALLPHVSGLK.G<br>R.LIDEGHLAPDMISFLK.R<br>R.PLANQVQLK.L<br>K.QFRPLAANQVQLK.L<br>R.VTSAFLDER.F<br>R.SYAESELLPR.V<br>R.HAVNLETVNTYEGTHDVHALLGR.A<br>R.FDREIMSEMGR.L<br>R.DMHGNGISADYHVIR.H<br>R.LIDEGHLAPDMISFLK.N<br>R.SACSVQSSLVHPINAYGSEEQKR.N<br>R.DVTGSAGHIDMALLDSQAVLANQAANFLASGVAPK.R<br>R.LANRDELIPLLAAK.I<br>R.ALLADADVNIENYK.V<br>K.AGLAYADIFTGLYSAVAVLAALR.R<br>R.LIPSLATGAPLDNWFDR.G<br>R.LIIVPVAITAVSGDALAK.A<br>R.GTVELGGYGEPLIR.I<br>K.TSGYTFIVDPVTGVPALGANGLPR.S<br>R.GTNSTLSAFIR.G<br>K.EYNTNIGGVPDVAVER.E<br>R.SALGTEGLTAFVGNPR.Q<br>K.AGAIIDTIGATTNWTLEASR.G<br>R.VSLQVQPTSDHNFYASYSGFK.G<br>R.GVGNVPAIAPGSPDAAVASFLPEQVDSYEVGYK.G<br>K.YVTKPLQEFSLR.I<br>K.WTASGTLAYSTPVGDGEIR.F<br>R.QNYLGGSPVFGAGVFPAPSTNFDGSR.K<br>R.GPGTLYGR.N<br>R.LTLSTALGYDAQYK.E<br>R.GGFGDNLNGLNENKDVWAGR.G<br>R.GGFGDNLNGLNENYK.D                                                                                                                                                                                                                                                                                                      |
| YP_617914 | Sala_2876 | porphobilinogen deaminase                                                           | 43.81%            | 8                       | R.VPEGTPPGEYR.A<br>R.AVPDAVAATAAPK.P<br>R.YTEBEIQQGTTIDEAER.V<br>R.SVYGDIEVTRPGVAEPLLVAR.G<br>R.VDGLGAEAAIGK.A<br>R.GTEVVLNIGAEPATYR.I<br>K.PASAGVSIALTPYGITIPVIVR.V<br>R.MTAAGGLAEAEADANDVER.A<br>R.GJAVYPEVAGR.Q<br>R.AALSMIAFSFR.R<br>K.AWVSEDEGAANFDLTR.T<br>R.IAPETVNLVDSR.A<br>R.TAALIDTLPVGEAFDWVEK.V<br>R.VAELQTLTISEMQK.R<br>R.LTAWSDALGDIESFNTLEER.Q<br>R.HLAGVYGIHR.C<br>R.AGADPVATHVDAR.V<br>R.PAATPAAATPPVVRPQNNALIGSSVDVGR.M<br>R.FDVVAIGNAIVDLVAR.A<br>R.ALAETQDPEAAAR.I<br>R.ADDALIEAELTK.G<br>R.ALGVAYETPAK.D<br>R.GSHGALAIQGGVR.T<br>R.ALGVAYETPAKDGAPTAR.C<br>R.LIDGAEAEER.L<br>R.TEVPPEIETVDDTTGAGDLFAAGFLSGLAERG.P<br>K.VAFTLSDAFIIEH.H<br>R.EIIAQVGR.A<br>R.LYAMGPAIEMSGGSAANTLAGMAALGER.C<br>R.TMNTFLGASHLLDR.V<br>R.KVAFTLSDAFIIEH.H<br>R.IAPQVLLVTR.G<br>R.TMNTFLGASHLLDR.V<br>R.CAFIQVADDQLGAVFTHDLR.A<br>R.ALIAEGLDFILFANEVEIR.A<br>R.NAPLAADAIEWGRTR.R<br>R.ASPQDADTVLAK.G<br>K.TSFEPLGPVTR.N<br>R.TAEGAFAPVAIAAAR.A<br>R.NFVIGGVAAGTALAQLLAADGAPVR.L<br>R.NFALGQQLGR.G<br>R.VADAIQALLSR.P<br>R.EADVVAIAEAHR.N<br>K.AETLAGLAGLDLVLTCTSANR.N<br>R.VAGQEAERHPYGGVPEIAAR.A<br>R.WPLDPAEAER.G<br>R.JAEGDPHAPVLPRLVGSAPHFVAGL.K.S<br>K.LLGLGYPGPAVER.I<br>R.LATTIDDAAGEAFDK.T<br>R.IAEGDPHAPVLP.P<br>R.LATTIDDAAGEAFDK.TAK.L<br>R.AFVAVGVAANGAIR.T<br>K.ALAHAANKPLJAVNHLEGHLSR.L<br>K.LAAGEADATLLAAGLER.L<br>R.LDAEIFSEGDHAGHVIVTDAGVVAALGHR.L<br>R.ELDAALDAGTIDVAVHSLKDVETLR.D<br>R.LRPLDVLTR.G<br>R.ADDAANTALLAEDHAPTHR.A<br>R.SPVAAYAEWQADGVL.R<br>R.EGIAAQKISELPHGAR.L<br>K.ISELPHGAR.L<br>R.LAGPGLGALASPAYAVGPATAEAR.A<br>R.GHLSVAISAAVAQAAGAWR.V<br>K.TIDTSRDPVTLER.Q.R.T<br>R.TQLDALAPQLVGR.S<br>R.ITLQAESASGNAR.A<br>K.AAEGAPLVIAPVDGAGALAAAR.V<br>R.GLSGLYLDQQLR.L<br>R.WLTDASAPAAR.T<br>R.FSDDDQNAVK.T<br>R.AEGLVAVAVR.R<br>R.ALDLIETAILEPR.D<br>R.LRFQDDQNAVK.T<br>R.ELGELFVVR.A<br>K.AGVDPILLIAGDAVK.A<br>R.VIAGQADK.A<br>R.SSEGSGLWTGLR.R<br>R.RALDLIETAILEPR.D<br>K.AIAEVEAMPGVDAAGEWLIDAR.R<br>R.RVLAAGQADK.A<br>R.DSPAALAEK.T<br>R.IEALDPLDPLALDQLSEER.M<br>R.LGLGATIDPEYGGAGLNYSYGLIAR.E<br>K.MWITNSPIADVFWVAK.S<br>K.LANMLTEIALGTQALR.V<br>R.ASVTGEIVMDGVEGEDALLPHVSGLK.G<br>R.LIDEGHLAPDMISFLK.R<br>R.PLANQVQLK.L<br>K.QFRPLAANQVQLK.L<br>R.VTSAFLDER.F<br>R.SYAESELLPR.V<br>R.HAVNLETVNTYEGTHDVHALLGR.A<br>R.FDREIMSEMGR.L<br>R.DMHGNGISADYHVIR.H<br>R.LIDEGHLAPDMISFLK.N<br>R.SACSVQSSLVHPINAYGSEEQKR.N<br>R.DVTGSAGHIDMALLDSQAVLANQAANFLASGVAPK.R<br>R.LANRDELIPLLAAK.I<br>R.ALLADADVNIENYK.V<br>K.AGLAYADIFTGLYSAVAVLAALR.R<br>R.LIPSLATGAPLDNWFDR.G<br>R.LIIVPVAITAVSGDALAK.A<br>R.GTVELGGYGEPLIR.I<br>K.TSGYTFIVDPVTGVPALGANGLPR.S<br>R.GTNSTLSAFIR.G<br>K.EYNTNIGGVPDVAVER.E<br>R.SALGTEGLTAFVGNPR.Q<br>K.AGAIIDTIGATTNWTLEASR.G<br>R.VSLQVQPTSDHNFYASYSGFK.G<br>R.GVGNVPAIAPGSPDAAVASFLPEQVDSYEVGYK.G<br>K.YVTKPLQEFSLR.I<br>K.WTASGTLAYSTPVGDGEIR.F<br>R.QNYLGGSPVFGAGVFPAPSTNFDGSR.K<br>R.GPGTLYGR.N<br>R.LTLSTALGYDAQYK.E<br>R.GGFGDNLNGLNENKDVWAGR.G<br>R.GGFGDNLNGLNENYK.D                                                                                                                                                                                                                                                                                                      |
| YP_617915 | Sala_2877 | uroporphyrinogen-III synthase                                                       | 20.52%            | 2                       | R.VPEGTPPGEYR.A<br>R.AVPDAVAATAAPK.P<br>R.YTEBEIQQGTTIDEAER.V<br>R.SVYGDIEVTRPGVAEPLLVAR.G<br>R.VDGLGAEAAIGK.A<br>R.GTEVVLNIGAEPATYR.I<br>K.PASAGVSIALTPYGITIPVIVR.V<br>R.MTAAGGLAEAEADANDVER.A<br>R.GJAVYPEVAGR.Q<br>R.AALSMIAFSFR.R<br>K.AWVSEDEGAANFDLTR.T<br>R.IAPETVNLVDSR.A<br>R.TAALIDTLPVGEAFDWVEK.V<br>R.VAELQTLTISEMQK.R<br>R.LTAWSDALGDIESFNTLEER.Q<br>R.HLAGVYGIHR.C<br>R.AGADPVATHVDAR.V<br>R.PAATPAAATPPVVRPQNNALIGSSVDVGR.M<br>R.FDVVAIGNAIVDLVAR.A<br>R.ALAETQDPEAAAR.I<br>R.ADDALIEAELTK.G<br>R.ALGVAYETPAK.D<br>R.GSHGALAIQGGVR.T<br>R.ALGVAYETPAKDGAPTAR.C<br>R.LIDGAEAEER.L<br>R.TEVPPEIETVDDTTGAGDLFAAGFLSGLAERG.P<br>K.VAFTLSDAFIIEH.H<br>R.EIIAQVGR.A<br>R.LYAMGPAIEMSGGSAANTLAGMAALGER.C<br>R.TMNTFLGASHLLDR.V<br>R.KVAFTLSDAFIIEH.H<br>R.IAPQVLLVTR.G<br>R.TMNTFLGASHLLDR                                                                                                                                                                                                                                                                                                                                                                                                                                                                                                                                                                                                                                                                                                                                                                                                                                                                                                                                                                                                                                                                                                                                                                                                                                                                                                                                                                                                                                                                                                                                                                                                                                                                                                                                                                                                                                                                                                                                                                                                                                                                                                                                                                                                                                                                                                                                                                                                                                     |

| Accession | Locus tag | Description                                           | Sequence coverage | No. peptides identified | List of peptides identified                                                                                                                                                                                                                                                                                                                                                                                                                                                                                                                                                                                                                                                                                                                                                                                                                                                                                                                                                                                                                                                                                                                                                                                                                                                                                                                                                                                                                                                                                                                                                                                                                                                                                                                                                                                                                                                                                                                                                                                                                                                                                                                                                                                                                                                                                                                                                                                                                                                                                                                                                                                                                                                                                                                                                                                                                                                                                                                                                                                                                                                                                                                                                                                                                                                                                                                                                                                              |
|-----------|-----------|-------------------------------------------------------|-------------------|-------------------------|--------------------------------------------------------------------------------------------------------------------------------------------------------------------------------------------------------------------------------------------------------------------------------------------------------------------------------------------------------------------------------------------------------------------------------------------------------------------------------------------------------------------------------------------------------------------------------------------------------------------------------------------------------------------------------------------------------------------------------------------------------------------------------------------------------------------------------------------------------------------------------------------------------------------------------------------------------------------------------------------------------------------------------------------------------------------------------------------------------------------------------------------------------------------------------------------------------------------------------------------------------------------------------------------------------------------------------------------------------------------------------------------------------------------------------------------------------------------------------------------------------------------------------------------------------------------------------------------------------------------------------------------------------------------------------------------------------------------------------------------------------------------------------------------------------------------------------------------------------------------------------------------------------------------------------------------------------------------------------------------------------------------------------------------------------------------------------------------------------------------------------------------------------------------------------------------------------------------------------------------------------------------------------------------------------------------------------------------------------------------------------------------------------------------------------------------------------------------------------------------------------------------------------------------------------------------------------------------------------------------------------------------------------------------------------------------------------------------------------------------------------------------------------------------------------------------------------------------------------------------------------------------------------------------------------------------------------------------------------------------------------------------------------------------------------------------------------------------------------------------------------------------------------------------------------------------------------------------------------------------------------------------------------------------------------------------------------------------------------------------------------------------------------------------------|
|           |           |                                                       |                   |                         | K.THQFEIPNPYIDQK.G<br>K.GLLGYYLDATADTLFDV.R.I<br>R.GVGQQDPVSGFQGVGIYLDVYLNRPQAALVDIYEVER.I<br>R.GGLNDPKQEIEYGLAMNVSALSDDTVTLR.S<br>R.LAEDMAAGDR.L<br>R.IGLESYLVFR.E<br>R.IIDEAEFVDESYR.R<br>R.VALNQVLLANQVGGTVPLEETYSLSAEVR.Q<br>R.ALVDQTDPAR.W<br>R.AQLTEDHFFLELQFR.V<br>R.MTFANMLGTLDLHLVKG.A<br>K.VDLTLPNGVR.F<br>R.GLEIDPANVTAIAR.G<br>R.VVHLSGDKPTSDAASWR.A<br>R.AEHAIIFLIAR.G<br>R.GGSVYQSDANR.D<br>R.AFVSPNFVHVR.V<br>R.HSAQNIAFHEVGR.Q<br>R.IVQALQSVGAASFVELSAPFGHDSFLDVPALDR.I<br>R.LGSAIVIASAAR.H<br>R.IVAGALGGGR.<br>R.FTLVSDFDWLYPTAESR.R<br>R.AQAMLLDHLGIA.R<br>R.VVYLANPNPTGLATR.E<br>R.VGAVPVEADDRDFATVDALLAAVTDR.T<br>R.YGFVYEAAR.R<br>K.LSANENPLGTGEK.A<br>R.IGVGYASADVIAALHR.I<br>R.AGQAQVAAALGDDDFVNR.S<br>R.AWLAAELESIGNHGVR.V<br>R.AFAAVQSPDALS.R.Y<br>R.MTIGTEETR.G<br>R.WLPGQIPQALR.M<br>R.YPDPGSVELR.A<br>R.LMDAGYVVR.W<br>K.SAGADGRPLK.L<br>R.LYAGLPQNVLFIDQYAEYLPDEDDGGLEAK.T<br>R.AFAAVQSPDALS.R.Y<br>R.VVPSATNLLVLFEGAVSAETVYHR.L<br>R.VICGSGDELHLAGTYAGPGDEILYVR.Y<br>R.LMDAGYVVR.W<br>R.IRLPFNVTR.A<br>K.TRPNVFRVTR.T<br>K.IHGLAERIGWGYASADVIAALHR.I<br>R.RVGAVPVEADDRDFATVDALLAAVTDR.T<br>R.DFATDVALLAAVTDR.T<br>K.IHGLAER.I<br>R.VAIVGLIGSSVAR.A<br>R.SIIEQGDDAAPPDFGR.K<br>R.FNEDLTLVQAIR.R<br>R.LPGVAVAGYDASDAVR.V<br>K.ALPHDAVIPAHPVAGTENSPPAAGFATLFDGR.W<br>R.WCVLTPPAGAPQAVTAVTSFWQALGAR.V<br>R.DVFLANKDAVLAQLQR.F<br>R.ALGCDADAVGAAAVADADLVVAVPVGR.M<br>K.ARLPGVAVAGYDASDAVR.V<br>R.IAASDPVMMWR.D<br>K.EELFAIPVWQAAAR.F<br>K.GRPLFAEGR.V<br>R.AAANALNPEALLESVAL.<br>R.FYGLIPVDRDGGGK.A<br>R.SNATEVAWAAR.R<br>R.DVTIVTDAVR.S<br>K.TDAIVVVTGGGR.I<br>R.VTVQIVTANVTR.A<br>R.TEGDDVPLASLPLALVDIDFVGDRA<br>R.IJLGFALNR.L<br>R.IGVVFQDFR.L<br>R.IAGVGEEDLAGPVGEMSLWIGLER.A<br>R.AVIARPQLLVADEPTGNVDPDMAMR.L<br>R.VPPLIAELR.D<br>R.HSWFQQAAPPDPPDVPVTEAAR.G<br>R.DAQTIVYSWTKPPVR.V<br>R.VVVDTAIGPAGR.T<br>R.QWSNLVAELEDAIAVEAAR.G<br>R.ATGQPVTFNFGVGLSHETLAEGR.A<br>R.LPLSDVAIGTVANLGGVAEMLYTGENRNR.L<br>R.DALYSLEAAIAR.D<br>R.VDQIGGGPDFR.R<br>R.LGNVAVYLFGR.D<br>R.DHADLAAAFDAGGIVHSPYR.T<br>R.NGEHSEILTDR.L<br>R.LSLSSGELAR.L<br>R.GVSFATDGLR.F<br>R.FGVISGMIETAENLAK.D<br>R.SGLGWGDDILVELNEAFQVLAVLK.G<br>K.FGGALSSMSAGALGAILK.A<br>K.GWGWADDDSRNEILNVGSGISLGHPIGATGGR.I<br>R.MGIGPVPAVER.L<br>R.AGNLTHDR.L<br>R.VDDVVFSGYNGEAPAIHWSWLAAGLPLEVPYQLDR.R<br>K.GDPVIFAHDEGYR.A<br>K.GLFDDELVPVEPQK.K<br>K.GLFDDELVPVEPQK.K<br>K.GDPVIFAHDEGYRADASLETGK.L<br>R.IJASGALPFAVTFEPDVGSDLSLQTR.A<br>R.DAAQAALAE.L<br>R.ALADSAELLDAGHAALR.A<br>R.WHLANALIPDATVR.A<br>R.LAARPIDEEQR.A<br>R.IILNIFEGAAEQVIAAR.G<br>R.FTDAEIVPHHR.W<br>R.VLGSALATGAGVPLSSGLR.M<br>K.GRVLGSALATGAGVPLSSGLR.M<br>K.AIEGASQLTQTIHLR.<br>R.NGSFPTPDGYIDTTGAR.L<br>R.SNVDITTEELVLMMAAQR.N<br>R.LNGITQFTQGSYESSK.T<br>K.AQGDIFASSPTQSTK.M<br>K.KQDYLDCLLVSLMK.M<br>R.TVIESDGAIVHTVQ.Q<br>R.TEGPVAVEPHIEDPKNSTIFQYQPK.L<br>K.QLIASLHGHQPVLIEAAR.S<br>R.IADDAQDFHVD.<br>R.AVEHVDVPLGPGSSK.L<br>K.LAVVEFAGQR.I<br>R.DKSIAAPNFDLLAGVSLR.V<br>K.SIAAAPNFDLLAGVSLR.V<br>K.GEIVSVDGR.Y<br>R.SGAEQLSFAEWGAAAPAFWR.Y<br>R.ADDELVQRF.F<br>R.GQLGGEREELTDAEDR.F<br>R.AAASVAFPALESVANQFAR.S<br>R.QLTAINDVLR.E<br>R.STDAPEPAAEGEDKEAPL.V<br>R.EKEGFGGIDNVYFTSLVIQ.<br>R.SVNLVLAEQDPAASLTSQGGK.Q<br>K.VGTVSVNDR.F<br>K.EGFGGIDNVYFTSLVIQ.<br>R.TVVTQAVGNVR.A<br>K.KMPKQLSERTLSLK.K<br>R.NANDGISLAQTADSAAGSISDILVR.M<br>R.LTSAVDNLSTVNLAEASK.S<br>R.AALQTEVTAIISQDIATR.T<br>R.ELAVQSANGNTGTTDR.A<br>R.ANLGAQQR.L<br>R.INAKDDAAGLAIATR.M |
| YP_617921 | Sala_2883 | transcriptional regulator, TetR family                | 11.85%            | 2                       |                                                                                                                                                                                                                                                                                                                                                                                                                                                                                                                                                                                                                                                                                                                                                                                                                                                                                                                                                                                                                                                                                                                                                                                                                                                                                                                                                                                                                                                                                                                                                                                                                                                                                                                                                                                                                                                                                                                                                                                                                                                                                                                                                                                                                                                                                                                                                                                                                                                                                                                                                                                                                                                                                                                                                                                                                                                                                                                                                                                                                                                                                                                                                                                                                                                                                                                                                                                                                          |
| YP_617922 | Sala_2884 | hypothetical protein                                  | 48.82%            | 5                       |                                                                                                                                                                                                                                                                                                                                                                                                                                                                                                                                                                                                                                                                                                                                                                                                                                                                                                                                                                                                                                                                                                                                                                                                                                                                                                                                                                                                                                                                                                                                                                                                                                                                                                                                                                                                                                                                                                                                                                                                                                                                                                                                                                                                                                                                                                                                                                                                                                                                                                                                                                                                                                                                                                                                                                                                                                                                                                                                                                                                                                                                                                                                                                                                                                                                                                                                                                                                                          |
| YP_617923 | Sala_2885 | Methionine biosynthesis MetW                          | 33.85%            | 5                       |                                                                                                                                                                                                                                                                                                                                                                                                                                                                                                                                                                                                                                                                                                                                                                                                                                                                                                                                                                                                                                                                                                                                                                                                                                                                                                                                                                                                                                                                                                                                                                                                                                                                                                                                                                                                                                                                                                                                                                                                                                                                                                                                                                                                                                                                                                                                                                                                                                                                                                                                                                                                                                                                                                                                                                                                                                                                                                                                                                                                                                                                                                                                                                                                                                                                                                                                                                                                                          |
| YP_617924 | Sala_2886 | homoserine O-acetyltransferase                        | 27.08%            | 6                       |                                                                                                                                                                                                                                                                                                                                                                                                                                                                                                                                                                                                                                                                                                                                                                                                                                                                                                                                                                                                                                                                                                                                                                                                                                                                                                                                                                                                                                                                                                                                                                                                                                                                                                                                                                                                                                                                                                                                                                                                                                                                                                                                                                                                                                                                                                                                                                                                                                                                                                                                                                                                                                                                                                                                                                                                                                                                                                                                                                                                                                                                                                                                                                                                                                                                                                                                                                                                                          |
| YP_617925 | Sala_2887 | histidinol-phosphate aminotransferase                 | 80.86%            | 24                      |                                                                                                                                                                                                                                                                                                                                                                                                                                                                                                                                                                                                                                                                                                                                                                                                                                                                                                                                                                                                                                                                                                                                                                                                                                                                                                                                                                                                                                                                                                                                                                                                                                                                                                                                                                                                                                                                                                                                                                                                                                                                                                                                                                                                                                                                                                                                                                                                                                                                                                                                                                                                                                                                                                                                                                                                                                                                                                                                                                                                                                                                                                                                                                                                                                                                                                                                                                                                                          |
| YP_617926 | Sala_2888 | Prephenate dehydrogenase                              | 59.33%            | 10                      |                                                                                                                                                                                                                                                                                                                                                                                                                                                                                                                                                                                                                                                                                                                                                                                                                                                                                                                                                                                                                                                                                                                                                                                                                                                                                                                                                                                                                                                                                                                                                                                                                                                                                                                                                                                                                                                                                                                                                                                                                                                                                                                                                                                                                                                                                                                                                                                                                                                                                                                                                                                                                                                                                                                                                                                                                                                                                                                                                                                                                                                                                                                                                                                                                                                                                                                                                                                                                          |
| YP_617927 | Sala_2889 | phospholipid/glycerol acyltransferase                 | 24.28%            | 4                       |                                                                                                                                                                                                                                                                                                                                                                                                                                                                                                                                                                                                                                                                                                                                                                                                                                                                                                                                                                                                                                                                                                                                                                                                                                                                                                                                                                                                                                                                                                                                                                                                                                                                                                                                                                                                                                                                                                                                                                                                                                                                                                                                                                                                                                                                                                                                                                                                                                                                                                                                                                                                                                                                                                                                                                                                                                                                                                                                                                                                                                                                                                                                                                                                                                                                                                                                                                                                                          |
| YP_617928 | Sala_2890 | protein of unknown function DUF218                    | 19.32%            | 3                       |                                                                                                                                                                                                                                                                                                                                                                                                                                                                                                                                                                                                                                                                                                                                                                                                                                                                                                                                                                                                                                                                                                                                                                                                                                                                                                                                                                                                                                                                                                                                                                                                                                                                                                                                                                                                                                                                                                                                                                                                                                                                                                                                                                                                                                                                                                                                                                                                                                                                                                                                                                                                                                                                                                                                                                                                                                                                                                                                                                                                                                                                                                                                                                                                                                                                                                                                                                                                                          |
| YP_617929 | Sala_2891 | protein of unknown function DUF214                    | 12.96%            | 2                       |                                                                                                                                                                                                                                                                                                                                                                                                                                                                                                                                                                                                                                                                                                                                                                                                                                                                                                                                                                                                                                                                                                                                                                                                                                                                                                                                                                                                                                                                                                                                                                                                                                                                                                                                                                                                                                                                                                                                                                                                                                                                                                                                                                                                                                                                                                                                                                                                                                                                                                                                                                                                                                                                                                                                                                                                                                                                                                                                                                                                                                                                                                                                                                                                                                                                                                                                                                                                                          |
| YP_617930 | Sala_2892 | ABC transporter related                               | 29.11%            | 4                       |                                                                                                                                                                                                                                                                                                                                                                                                                                                                                                                                                                                                                                                                                                                                                                                                                                                                                                                                                                                                                                                                                                                                                                                                                                                                                                                                                                                                                                                                                                                                                                                                                                                                                                                                                                                                                                                                                                                                                                                                                                                                                                                                                                                                                                                                                                                                                                                                                                                                                                                                                                                                                                                                                                                                                                                                                                                                                                                                                                                                                                                                                                                                                                                                                                                                                                                                                                                                                          |
| YP_617931 | Sala_2893 | Zinc finger/thioredoxin putative                      | 26.38%            | 4                       |                                                                                                                                                                                                                                                                                                                                                                                                                                                                                                                                                                                                                                                                                                                                                                                                                                                                                                                                                                                                                                                                                                                                                                                                                                                                                                                                                                                                                                                                                                                                                                                                                                                                                                                                                                                                                                                                                                                                                                                                                                                                                                                                                                                                                                                                                                                                                                                                                                                                                                                                                                                                                                                                                                                                                                                                                                                                                                                                                                                                                                                                                                                                                                                                                                                                                                                                                                                                                          |
| YP_617933 | Sala_2895 | L-carnitine dehydratase/bile acid-inducible protein F | 41.00%            | 10                      |                                                                                                                                                                                                                                                                                                                                                                                                                                                                                                                                                                                                                                                                                                                                                                                                                                                                                                                                                                                                                                                                                                                                                                                                                                                                                                                                                                                                                                                                                                                                                                                                                                                                                                                                                                                                                                                                                                                                                                                                                                                                                                                                                                                                                                                                                                                                                                                                                                                                                                                                                                                                                                                                                                                                                                                                                                                                                                                                                                                                                                                                                                                                                                                                                                                                                                                                                                                                                          |
| YP_617934 | Sala_2896 | Acetyl-CoA C-acetyltransferase                        | 47.52%            | 11                      |                                                                                                                                                                                                                                                                                                                                                                                                                                                                                                                                                                                                                                                                                                                                                                                                                                                                                                                                                                                                                                                                                                                                                                                                                                                                                                                                                                                                                                                                                                                                                                                                                                                                                                                                                                                                                                                                                                                                                                                                                                                                                                                                                                                                                                                                                                                                                                                                                                                                                                                                                                                                                                                                                                                                                                                                                                                                                                                                                                                                                                                                                                                                                                                                                                                                                                                                                                                                                          |
| YP_617935 | Sala_2897 | acyl-CoA dehydrogenase-like protein                   | 20.87%            | 7                       |                                                                                                                                                                                                                                                                                                                                                                                                                                                                                                                                                                                                                                                                                                                                                                                                                                                                                                                                                                                                                                                                                                                                                                                                                                                                                                                                                                                                                                                                                                                                                                                                                                                                                                                                                                                                                                                                                                                                                                                                                                                                                                                                                                                                                                                                                                                                                                                                                                                                                                                                                                                                                                                                                                                                                                                                                                                                                                                                                                                                                                                                                                                                                                                                                                                                                                                                                                                                                          |
| YP_617939 | Sala_2901 | transcriptional regulator, MarR family                | 14.29%            | 2                       |                                                                                                                                                                                                                                                                                                                                                                                                                                                                                                                                                                                                                                                                                                                                                                                                                                                                                                                                                                                                                                                                                                                                                                                                                                                                                                                                                                                                                                                                                                                                                                                                                                                                                                                                                                                                                                                                                                                                                                                                                                                                                                                                                                                                                                                                                                                                                                                                                                                                                                                                                                                                                                                                                                                                                                                                                                                                                                                                                                                                                                                                                                                                                                                                                                                                                                                                                                                                                          |
| YP_617948 | Sala_2910 | protein of unknown function DUF1078-like protein      | 31.27%            | 5                       |                                                                                                                                                                                                                                                                                                                                                                                                                                                                                                                                                                                                                                                                                                                                                                                                                                                                                                                                                                                                                                                                                                                                                                                                                                                                                                                                                                                                                                                                                                                                                                                                                                                                                                                                                                                                                                                                                                                                                                                                                                                                                                                                                                                                                                                                                                                                                                                                                                                                                                                                                                                                                                                                                                                                                                                                                                                                                                                                                                                                                                                                                                                                                                                                                                                                                                                                                                                                                          |
| YP_617956 | Sala_2918 | flagellar motor protein                               | 26.13%            | 4                       |                                                                                                                                                                                                                                                                                                                                                                                                                                                                                                                                                                                                                                                                                                                                                                                                                                                                                                                                                                                                                                                                                                                                                                                                                                                                                                                                                                                                                                                                                                                                                                                                                                                                                                                                                                                                                                                                                                                                                                                                                                                                                                                                                                                                                                                                                                                                                                                                                                                                                                                                                                                                                                                                                                                                                                                                                                                                                                                                                                                                                                                                                                                                                                                                                                                                                                                                                                                                                          |
| YP_617965 | Sala_2927 | hypothetical protein                                  | 40.22%            | 3                       |                                                                                                                                                                                                                                                                                                                                                                                                                                                                                                                                                                                                                                                                                                                                                                                                                                                                                                                                                                                                                                                                                                                                                                                                                                                                                                                                                                                                                                                                                                                                                                                                                                                                                                                                                                                                                                                                                                                                                                                                                                                                                                                                                                                                                                                                                                                                                                                                                                                                                                                                                                                                                                                                                                                                                                                                                                                                                                                                                                                                                                                                                                                                                                                                                                                                                                                                                                                                                          |
| YP_617966 | Sala_2928 | Flagellar motor switch FLIN                           | 25.23%            | 3                       |                                                                                                                                                                                                                                                                                                                                                                                                                                                                                                                                                                                                                                                                                                                                                                                                                                                                                                                                                                                                                                                                                                                                                                                                                                                                                                                                                                                                                                                                                                                                                                                                                                                                                                                                                                                                                                                                                                                                                                                                                                                                                                                                                                                                                                                                                                                                                                                                                                                                                                                                                                                                                                                                                                                                                                                                                                                                                                                                                                                                                                                                                                                                                                                                                                                                                                                                                                                                                          |
| YP_617967 | Sala_2929 | surface presentation of antigens (SPOA) protein       | 21.15%            | 4                       |                                                                                                                                                                                                                                                                                                                                                                                                                                                                                                                                                                                                                                                                                                                                                                                                                                                                                                                                                                                                                                                                                                                                                                                                                                                                                                                                                                                                                                                                                                                                                                                                                                                                                                                                                                                                                                                                                                                                                                                                                                                                                                                                                                                                                                                                                                                                                                                                                                                                                                                                                                                                                                                                                                                                                                                                                                                                                                                                                                                                                                                                                                                                                                                                                                                                                                                                                                                                                          |
| YP_617968 | Sala_2930 | flagellar basal body-associated protein FILL          | 39.80%            | 6                       |                                                                                                                                                                                                                                                                                                                                                                                                                                                                                                                                                                                                                                                                                                                                                                                                                                                                                                                                                                                                                                                                                                                                                                                                                                                                                                                                                                                                                                                                                                                                                                                                                                                                                                                                                                                                                                                                                                                                                                                                                                                                                                                                                                                                                                                                                                                                                                                                                                                                                                                                                                                                                                                                                                                                                                                                                                                                                                                                                                                                                                                                                                                                                                                                                                                                                                                                                                                                                          |
| YP_617973 | Sala_2935 | flagellar motor switch protein FLIG                   | 7.58%             | 2                       |                                                                                                                                                                                                                                                                                                                                                                                                                                                                                                                                                                                                                                                                                                                                                                                                                                                                                                                                                                                                                                                                                                                                                                                                                                                                                                                                                                                                                                                                                                                                                                                                                                                                                                                                                                                                                                                                                                                                                                                                                                                                                                                                                                                                                                                                                                                                                                                                                                                                                                                                                                                                                                                                                                                                                                                                                                                                                                                                                                                                                                                                                                                                                                                                                                                                                                                                                                                                                          |
| YP_617976 | Sala_2938 | flagellin-like protein                                | 62.13%            | 15                      |                                                                                                                                                                                                                                                                                                                                                                                                                                                                                                                                                                                                                                                                                                                                                                                                                                                                                                                                                                                                                                                                                                                                                                                                                                                                                                                                                                                                                                                                                                                                                                                                                                                                                                                                                                                                                                                                                                                                                                                                                                                                                                                                                                                                                                                                                                                                                                                                                                                                                                                                                                                                                                                                                                                                                                                                                                                                                                                                                                                                                                                                                                                                                                                                                                                                                                                                                                                                                          |

| Accession | Locus tag | Description                                                          | Sequence coverage | No. peptides identified | List of peptides identified                                                                                                                                                                                                                                                                                                                                                                                                                                                                                                                                                                                                                                                                                                                                                                                                                                                                                                                                                                                                                                                                                                                                                                                                                                                                                                                                                                                                                                                                                                                                                                                                                                                                                                                                                                                                                                                                                                                                                                                                                                                                                                                                                                                                                                                                                                                                                                                                                                                                                                                                                                                                                                                                                                                                                                                                                                                                                                                                                                                                                 |
|-----------|-----------|----------------------------------------------------------------------|-------------------|-------------------------|---------------------------------------------------------------------------------------------------------------------------------------------------------------------------------------------------------------------------------------------------------------------------------------------------------------------------------------------------------------------------------------------------------------------------------------------------------------------------------------------------------------------------------------------------------------------------------------------------------------------------------------------------------------------------------------------------------------------------------------------------------------------------------------------------------------------------------------------------------------------------------------------------------------------------------------------------------------------------------------------------------------------------------------------------------------------------------------------------------------------------------------------------------------------------------------------------------------------------------------------------------------------------------------------------------------------------------------------------------------------------------------------------------------------------------------------------------------------------------------------------------------------------------------------------------------------------------------------------------------------------------------------------------------------------------------------------------------------------------------------------------------------------------------------------------------------------------------------------------------------------------------------------------------------------------------------------------------------------------------------------------------------------------------------------------------------------------------------------------------------------------------------------------------------------------------------------------------------------------------------------------------------------------------------------------------------------------------------------------------------------------------------------------------------------------------------------------------------------------------------------------------------------------------------------------------------------------------------------------------------------------------------------------------------------------------------------------------------------------------------------------------------------------------------------------------------------------------------------------------------------------------------------------------------------------------------------------------------------------------------------------------------------------------------|
|           |           |                                                                      |                   |                         | K.DDAAGLAIATR.M<br>R.MRELAVQSQANGTNGTDR.A<br>R.VASQMQSQAMER.L<br>R.IEDADFSVESTNLAAGILQAQSTAMLAQANQSTQGVMMNLLR.<br>R.VASQMQSQAMER.L<br>R.VASQMQSQAMER.L<br>R.GLTQAIR.N<br>K.RINAAKDDAAGLAIATR.M<br>R.ANLAGQQRNLTSAVDNLTSTVTNLAESK.S<br>R.AEGLTYSQFMHGVK.L<br>K.VMADLAMNEGGVFTAIVAQAQ.A<br>R.KVMADLAMNEGGVFTAIVAQAQ.A<br>K.LAGIELDRK.V<br>K.LAGIELDR.K<br>K.AGGQAYR.D<br>R.GTSLVSEADAHAHVR.L<br>R.TNRGTSLVSEADAHAHVR.L<br>R.LISHNSK.Y<br>R.FKFTASGK.V<br>K.VKHGVAGK.R                                                                                                                                                                                                                                                                                                                                                                                                                                                                                                                                                                                                                                                                                                                                                                                                                                                                                                                                                                                                                                                                                                                                                                                                                                                                                                                                                                                                                                                                                                                                                                                                                                                                                                                                                                                                                                                                                                                                                                                                                                                                                                                                                                                                                                                                                                                                                                                                                                                                                                                                                                         |
| YP_617977 | Sala_2939 | ribosomal protein L20                                                | 42.98%            | 6                       | R.DGIIEEYGAERPEAR.Q<br>R.WVGATGHPTLLGGKPATR.A<br>R.WVGATGHPTLLGGK.P<br>R.RLLDEAPR.D<br>R.LEDVIEGLACDH.<br>R.AIADYLELPLTDTSVR.R<br>K.LVANLITTSADRV.V<br>R.VNASELTELVTDSIQPTDAVNDK.V<br>R.AGESEVMNIIGDVAGR.F<br>R.GQDVFVQPTNFANDNLMELLIINDALRR.A<br>R.TLVAPLLGEAIK.R<br>R.ITAVVPYFGYAR.Q<br>K.LISGNSNLP.LAR.A<br>R.TLVAPLLGEAIK.R<br>R.FGDKMLNVSPOVGGVVR.A<br>R.FADEEVFVEIHENVR.G<br>R.GQDVFVQPTNFANDNLMELLIINDALR.R<br>R.ERAGESEVMNIIGDVAGR.F<br>K.RLDNAPLAIADK.R<br>K.NLMVSPDVGWVR.A<br>R.RFADEEVFVEIHENVR.G<br>R.LDNAPLAIADK.R<br>R.AIADYLELPLTDTSVRR.F<br>R.IADETSVSLFD.<br>R.GQDVFVQPTNFANDNLMELLIINDALRR.A<br>R.FCLIDIDVDSAGTLCAAGALK.A<br>K.RLDNAPLAIADK.R<br>K.AAGAEVYVYCTHGVLSGGAVAR.V<br>R.LDNAPLAIADK.R<br>R.GQDVFVQPTNFANDNLMELLIINDALR.R<br>R.DADGSLYNIVALLDGGR.V<br>R.VFAGPLPDIIVEWR.G<br>R.AATLAEALADTADGGPAMLVGSVER.D<br>R.VAETGLPLJLNR.I<br>R.DADLILPELQLIGYPPELVKPALAER.A<br>R.LTDWEAER.V<br>R.GVTLMALS.NK.F<br>R.FTSQASLDDAAGCAR.M<br>K.FGPHLLTGNK.S<br>K.DQDSLPPYEDLR.M<br>R.LDTIPIVPAVEAFDQMLAGSFADADEVITEENVQSR.I<br>K.LGTPICEDGWL.PK.V<br>R.LGTSDPVPEVTDLAPLVSIDFAR.F<br>R.EQGIPIALAA.LAR.L<br>K.AALDIDWADPWHALTAAVK.E<br>R.SKEDYVAGIR.A<br>R.FRLDHDAPIEWTDLIR.G<br>R.KPADAPVPEGVAPHWR.F<br>R.LGSLGMASLR.E<br>R.GEDHVSNTAAQVQMFALGASPPAFPAHEALLVGTGK.L<br>R.FDEAELALLNQK.I<br>R.DHSPMAELLPLIAK.E<br>R.GPQHFEPTTMSDPVVR.R<br>R.FAPSPGHLHGVNR.T<br>R.ADLAWLGLDIDAEER.Q<br>K.ILHHIDHAAVDRPLPAIDEAR.W<br>K.LVSTADTGFYVTK.K<br>R.KHVEK.E<br>K.LVSTADTGFYVTK.N<br>K.IKLVSTADTGFYVTK.K<br>K.HVEFEAK.I<br>R.FAALPAWEQAMILAGTER.L<br>R.EIDAGNVTPLVAGQR.L<br>K.DPDASASASSEVR.F<br>R.PAQDGVTHMITTITADNQASWGLFR.G<br>R.ETHFAGAHATEYLAR.I<br>K.DAEPLTPKDPDASASASSEVR.F<br>R.MIAALLAR.P<br>R.SKDAEPLTPK.D<br>R.DWGAELER.T<br>R.TPLFERETHFAGAHATEYLAR.I<br>R.YCNLLQCEHFADQCIAER.A<br>R.SKDAEPLTPKDPDASASASSEVR.F<br>R.PAQDGVTHMITTITADNQASWGLFR.G<br>R.MIAALLAR.P<br>R.FRFPVADGPAVTALIAACPLDR.N<br>R.DWGAELERTPLFER.E<br>K.VLAPLIVDAVLGAGLDILEK.I<br>R.TGTFSSFDMGFTPDIVTLAK.S<br>R.LADPSSGLDAPAAILLVETVQEGEGLNAASAEWLR.R<br>K.QDFLDTFEEVILKPR.G<br>R.GNNHAFVYATAALR.H<br>R.VMFTGPTTNAVEAAIK.L<br>R.LADPSSGLDAPAAILLVETVQEGEGLNAASAEWLR.R<br>R.HFWSADDFQR.D<br>R.IAAEHGFVR.G<br>K.QALLDYIAADGIAHGLDLHTDAK.Q<br>R.GGAGVPLSHVAHEPYDYDGPEVDTAELLEQR.L<br>K.AQGVVWHDQGGK.Y<br>K.SLSGMGLPFALTLRPELDQWSPGHEGNTFR.G<br>K.RGGAGVPLSHVAHEPYDYDGPEVDTAELLEQR.L<br>K.IREAMATDYAVAAE.<br>R.VMFTGPTTNAVEAAIK.L<br>R.TGTFSSFDMGFTPDIVTLAK.S<br>K.AHSGALLIVDDIQAGCGR.T<br>R.YLDFLSCGSLNYGHNHPILK.Q<br>R.EVHDESGAYPADPELAREV.AAD.<br>R.EVHDESGAYPADPELAREV.A<br>K.GTGTIEDLATGEVHALRPGVMYALDDHDR.H<br>R.MHYQNHLAEVLLK.G<br>R.MLLKDDGMGFSFHVTLFAGSEL.M<br>R.HIVRETDLTACGVFNPPVTGR.E<br>K.GTGTIEDLATGEVHALR.P<br>R.SDGWASAR.M<br>R.LDPVHVHSEWTDAPISAR.Q<br>R.ANAFLVYNAVSNR.L<br>K.AACNLLADPALDADTIVTEPQSNR.S<br>K.KQEVQVDEESLAEHLAHR.H<br>R.FLLGDEVYIHQSR.L<br>R.QAAAFDRDGYVLEDIFSADAEVFLQK.A<br>R.SIFEIHAQSPVMAR.L<br>R.HGIVAPTQK.P<br>R.ALSMSVLLAENTPHNPLMVIQSGSR.T<br>K.QEVQVDEESLAEHLAHR.H<br>R.MQDLYPSR.Q<br>R.DGYVLEDIFSADAEVFLQK.A<br>R.LNYPKPGK.G |
| YP_617978 | Sala_2940 | ribosomal protein L35                                                | 59.70%            | 5                       |                                                                                                                                                                                                                                                                                                                                                                                                                                                                                                                                                                                                                                                                                                                                                                                                                                                                                                                                                                                                                                                                                                                                                                                                                                                                                                                                                                                                                                                                                                                                                                                                                                                                                                                                                                                                                                                                                                                                                                                                                                                                                                                                                                                                                                                                                                                                                                                                                                                                                                                                                                                                                                                                                                                                                                                                                                                                                                                                                                                                                                             |
| YP_617979 | Sala_2941 | Histidinol-phosphate phosphatase, putative, inositol monophosphatase | 21.92%            | 5                       |                                                                                                                                                                                                                                                                                                                                                                                                                                                                                                                                                                                                                                                                                                                                                                                                                                                                                                                                                                                                                                                                                                                                                                                                                                                                                                                                                                                                                                                                                                                                                                                                                                                                                                                                                                                                                                                                                                                                                                                                                                                                                                                                                                                                                                                                                                                                                                                                                                                                                                                                                                                                                                                                                                                                                                                                                                                                                                                                                                                                                                             |
| YP_617980 | Sala_2942 | ribose-phosphate pyrophosphokinase                                   | 79.42%            | 25                      |                                                                                                                                                                                                                                                                                                                                                                                                                                                                                                                                                                                                                                                                                                                                                                                                                                                                                                                                                                                                                                                                                                                                                                                                                                                                                                                                                                                                                                                                                                                                                                                                                                                                                                                                                                                                                                                                                                                                                                                                                                                                                                                                                                                                                                                                                                                                                                                                                                                                                                                                                                                                                                                                                                                                                                                                                                                                                                                                                                                                                                             |
| YP_617981 | Sala_2943 | NAD+ synthetase                                                      | 37.05%            | 12                      |                                                                                                                                                                                                                                                                                                                                                                                                                                                                                                                                                                                                                                                                                                                                                                                                                                                                                                                                                                                                                                                                                                                                                                                                                                                                                                                                                                                                                                                                                                                                                                                                                                                                                                                                                                                                                                                                                                                                                                                                                                                                                                                                                                                                                                                                                                                                                                                                                                                                                                                                                                                                                                                                                                                                                                                                                                                                                                                                                                                                                                             |
| YP_617983 | Sala_2945 | glutamyl-tRNA synthetase                                             | 55.35%            | 14                      |                                                                                                                                                                                                                                                                                                                                                                                                                                                                                                                                                                                                                                                                                                                                                                                                                                                                                                                                                                                                                                                                                                                                                                                                                                                                                                                                                                                                                                                                                                                                                                                                                                                                                                                                                                                                                                                                                                                                                                                                                                                                                                                                                                                                                                                                                                                                                                                                                                                                                                                                                                                                                                                                                                                                                                                                                                                                                                                                                                                                                                             |
| YP_617985 | Sala_2947 | ribosomal protein L33                                                | 81.82%            | 5                       |                                                                                                                                                                                                                                                                                                                                                                                                                                                                                                                                                                                                                                                                                                                                                                                                                                                                                                                                                                                                                                                                                                                                                                                                                                                                                                                                                                                                                                                                                                                                                                                                                                                                                                                                                                                                                                                                                                                                                                                                                                                                                                                                                                                                                                                                                                                                                                                                                                                                                                                                                                                                                                                                                                                                                                                                                                                                                                                                                                                                                                             |
| YP_617986 | Sala_2948 | transcriptional regulator, MarR family                               | 21.38%            | 2                       |                                                                                                                                                                                                                                                                                                                                                                                                                                                                                                                                                                                                                                                                                                                                                                                                                                                                                                                                                                                                                                                                                                                                                                                                                                                                                                                                                                                                                                                                                                                                                                                                                                                                                                                                                                                                                                                                                                                                                                                                                                                                                                                                                                                                                                                                                                                                                                                                                                                                                                                                                                                                                                                                                                                                                                                                                                                                                                                                                                                                                                             |
| YP_617987 | Sala_2949 | L-2,4-diaminobutyric acid acetyltransferase                          | 70.31%            | 14                      |                                                                                                                                                                                                                                                                                                                                                                                                                                                                                                                                                                                                                                                                                                                                                                                                                                                                                                                                                                                                                                                                                                                                                                                                                                                                                                                                                                                                                                                                                                                                                                                                                                                                                                                                                                                                                                                                                                                                                                                                                                                                                                                                                                                                                                                                                                                                                                                                                                                                                                                                                                                                                                                                                                                                                                                                                                                                                                                                                                                                                                             |
| YP_617988 | Sala_2950 | Diaminobutyrate--2-oxoglutarate aminotransferase                     | 68.05%            | 19                      |                                                                                                                                                                                                                                                                                                                                                                                                                                                                                                                                                                                                                                                                                                                                                                                                                                                                                                                                                                                                                                                                                                                                                                                                                                                                                                                                                                                                                                                                                                                                                                                                                                                                                                                                                                                                                                                                                                                                                                                                                                                                                                                                                                                                                                                                                                                                                                                                                                                                                                                                                                                                                                                                                                                                                                                                                                                                                                                                                                                                                                             |
| YP_617989 | Sala_2951 | Ectoine synthase                                                     | 87.59%            | 8                       |                                                                                                                                                                                                                                                                                                                                                                                                                                                                                                                                                                                                                                                                                                                                                                                                                                                                                                                                                                                                                                                                                                                                                                                                                                                                                                                                                                                                                                                                                                                                                                                                                                                                                                                                                                                                                                                                                                                                                                                                                                                                                                                                                                                                                                                                                                                                                                                                                                                                                                                                                                                                                                                                                                                                                                                                                                                                                                                                                                                                                                             |
| YP_617990 | Sala_2952 | Ectoine hydroxylase                                                  | 88.56%            | 26                      |                                                                                                                                                                                                                                                                                                                                                                                                                                                                                                                                                                                                                                                                                                                                                                                                                                                                                                                                                                                                                                                                                                                                                                                                                                                                                                                                                                                                                                                                                                                                                                                                                                                                                                                                                                                                                                                                                                                                                                                                                                                                                                                                                                                                                                                                                                                                                                                                                                                                                                                                                                                                                                                                                                                                                                                                                                                                                                                                                                                                                                             |

| Accession | Locus tag | Description                                               | Sequence coverage | No. peptides identified | List of peptides identified                                                                                                                                                                                                                                                                                                                                                                                                                                                                                                                                                                                                                                                                                                                                                                                                                                                                                                                                                                                                                                                                                                                                                                                                                                                                                                                                                                                                                                                                                                                                                                                                                                                                                                                                                                                                                                                                                                                                                                                                                                                                                                                                                                                                                                                                                                                                                                                                                                                                                                                                                                                                                                                                                                                                                                                                                                                                                                                                                                                                                                                                                                                                                                                                                                                                                                                                                                                       |
|-----------|-----------|-----------------------------------------------------------|-------------------|-------------------------|-------------------------------------------------------------------------------------------------------------------------------------------------------------------------------------------------------------------------------------------------------------------------------------------------------------------------------------------------------------------------------------------------------------------------------------------------------------------------------------------------------------------------------------------------------------------------------------------------------------------------------------------------------------------------------------------------------------------------------------------------------------------------------------------------------------------------------------------------------------------------------------------------------------------------------------------------------------------------------------------------------------------------------------------------------------------------------------------------------------------------------------------------------------------------------------------------------------------------------------------------------------------------------------------------------------------------------------------------------------------------------------------------------------------------------------------------------------------------------------------------------------------------------------------------------------------------------------------------------------------------------------------------------------------------------------------------------------------------------------------------------------------------------------------------------------------------------------------------------------------------------------------------------------------------------------------------------------------------------------------------------------------------------------------------------------------------------------------------------------------------------------------------------------------------------------------------------------------------------------------------------------------------------------------------------------------------------------------------------------------------------------------------------------------------------------------------------------------------------------------------------------------------------------------------------------------------------------------------------------------------------------------------------------------------------------------------------------------------------------------------------------------------------------------------------------------------------------------------------------------------------------------------------------------------------------------------------------------------------------------------------------------------------------------------------------------------------------------------------------------------------------------------------------------------------------------------------------------------------------------------------------------------------------------------------------------------------------------------------------------------------------------------------------------|
| YP_617991 | Sala_2953 | amino acid-binding ACT                                    | 75.83%            | 31                      | K.PRPVFLAR.R<br>R.EFYWHSDFETWHVEDGMGR.M<br>R.LEKPFVGEK.P<br>R.TYLTVCGETPDDHYLSLKK.K<br>R.SIFEIHAQSPVMAR.L<br>R.EFYWHSDFETWHVEDGMGR.M<br>R.ALSMSVLLAENTPHNGPLMVIPGSHR.T<br>R.ALSMSVLLAENTPHNGPLMVIPGSHR.T<br>.MQDLYPSR.Q<br>K.PGTVLDFCNLMHGSNGNITFPPL.A<br>K.GREFYWHSDFETWHVEDGMGR.M<br>R.TYLTVCGETPDDHYLSLKK.K<br>R.RGEPAALR.V<br>K.IGGTSMATATLFDNVLIAGR.S<br>R.ELLAGIGEHAHSAHSTALLR.D<br>K.SSNANTITHYLSASAAVANK.A<br>K.GYDAAILDALAR.H<br>R.NTFREDEGLTVTDYVSDVPR.V<br>K.TGAPGVYGHFVDDDDADAWRR.A<br>R.TNYDVADQLANLGMIAHPGAGR.G<br>R.FGLKQLATVR.E<br>R.QVQALQFFEQDHWGVK.G<br>R.IGEFAAIDL.R<br>K.AIADLQGHYPAISAQPVAMVSVIGSDISRPLVPDALAR.A<br>R.DRDVNALFVLDLWDQDRL.S<br>R.ALDAAGVTMIAMQHQR.N<br>K.TGAPGVYGHFVDDDDADAWRR.R<br>R.FVVSAYAGHTDLLLENKK.T<br>R.GYTEFTSR.L<br>R.NVDVQLVDPD.R<br>R.SGADLYNR.I<br>R.HKLVIVSK.S<br>R.EDEGLTVTDYVSDVPR.V<br>R.EAIHKEFHLSADPK.L<br>R.FVVSAYAGHTDLLLENK.K<br>K.AIADLQGHYPAISAQPVAMVSVIGSDISR.P<br>R.TNYDVADQLANLGMIAHPGAGR.G<br>R.IDAVTACLDDLAR.L<br>R.DTLPVITGYAGCEGMVR.R<br>R.VEIVTGLR.Q<br>K.LLWVSK.S<br>K.EFHLSADPK.L<br>K.DQLATVR.E<br>R.TTPVAALLDPAGEPPENR.<br>R.SAAPALEDAASPLR.R<br>R.ALLTGAQEPPIVDITSLAAR.R<br>K.LVAHYAPVAEALPDRR.A<br>R.EAASDPALAEAR.H<br>R.EAAELDVPIGTVSR.L<br>R.GVHDVIDEAVTQIAGDGAAVEAGALR.S<br>R.RGVHDVIDEAVTQIAGDGAAVEAGALR.S<br>R.GAAATATGTAQGAAGAVR.D<br>R.AAEEQSAAPPAR.S<br>R.AELPPTLFGAPILVDR.G<br>K.EVAPVILPGPGLTGGAAQALIGIGWQLTSK.A<br>R.GDVAAPLIYTALDYLSDR.D<br>R.KTAIVVAPGR.G<br>R.GQPTVSELDGADR.F<br>R.FADLADFDQR.R<br>R.SEATDIFLSQTSR.Q<br>R.LYGHAGSDVQGAFLPK.A<br>R.TPAGWIEAQFR.H<br>R.WLGPVDTKLVAAVGGAK.R<br>R.VVVFEPALYMR.D<br>R.DLHEEGGLWTSIYEPAGEGTPIR.F<br>R.ANSPSDERK.A<br>R.DIRGIIAVPSNGR.D<br>R.ADAPDGAIGLSR.S<br>K.ALIEADEARDPLLK.G<br>R.QVPGQPTMDMLSFASSEDPISGGR.H<br>R.IAADDSPFLGR.A<br>K.GAALMIEGQWMSAADVADAVQEIATLAR.Q<br>R.ITGSQSEALMVFVEQTPDKK.I<br>R.GEAATLFFSNGQYTNPMVIR.I<br>R.EIVVAGEDVGP.K<br>K.FLGALEGR.L<br>R.LLWALADLMAHR.E<br>R.GEGFTIGSSGHEGNAVAVALR.A<br>R.FGVGVHGDGDLAIVTYGNGYLSR.Q<br>K.VIGSKPLAIPQSTIASHLK.A<br>R.SVEQVVAALLER.E<br>R.LAEEVDYIVR.L<br>K.GPIFAELLADEINR.T<br>R.FIVLATQNPKEQGVYLPPEALDR.F<br>R.FNSPAGDFGVTVADAAAAGAAIDVIATVR.L<br>K.LVVDYPADEERR.I<br>K.TLLAQAFAR.A<br>K.TQAALLEAMQER.R<br>K.LVDVYPADEER.R<br>R.VLSAAAEIEGR.S<br>R.IQFTPLMFGDILGSLNLFQTSSTLTK.G<br>R.IQFTPLMFGDILGSLNLFQTSSTLTK.G<br>R.RVTINGEPHVMSPR.F<br>R.ASGLDFGR.I<br>K.GPIFAELLADEINRTPPK.T<br>R.APSGSLNLPQWATLITGEAWQAVR.Q<br>R.AGQEPEDVPPALPAPWDRR.F<br>R.FGVGALYSLGIPR.E<br>R.TIGLDDQLFLGLAIGYADEDAAVNQWVPR.A<br>R.APIDEADWKGFGT.<br>R.APIDEADWK.G<br>R.SVDPALKEIFAAQR.A<br>R.FALETPGGGALTPVQAEIGR.V<br>R.LTSLDGAVSLR.T<br>R.GRFALETPGGGALTPVQAEIGR.V<br>R.TSAGTDQLR.F<br>R.VKDGGTDVYVWAPNETR.A<br>K.DGGTDVYVWAPNETR.A<br>K.FENTSDNAYK.V<br>R.RDFIQNALSVANLDV.<br>R.GHNYGLVEALALNGALDPAALDSAGR.T<br>K.VTPIRSELLEIFAHSR.K<br>R.RLHLLAAEQAEYAHPAR.L<br>K.GHLYAQPPYK.V<br>R.LHLLAAEQAEYAHPAR.L<br>K.GSSAALAAADAALAAEAEDAEDAEASDGLPAATAR.K<br>R.VTFQASTDFK.N<br>R.ELAFNSGVR.I<br>K.WTITAAGGGYVLEK.R<br>R.VEAQELIAHEIFER.L<br>R.GVSDHHAIDAAPLASQEAR.R<br>R.RELAFNSGVR.I<br>R.HAEHVSHDLFYEGGIAAFV.K.Y<br>R.DRHVQAILPK.K<br>R.DGGTHLAAR.A<br>K.TPLPDPJAISSEER.D<br>R.NKTLPPDJAISSEER.D<br>R.FEHGDVAAPLR.V<br>K.EVGTILQALGTGIRDEFNIEK.L<br>R.HVQAILPK.K<br>R.GIPTIHAEEGVSAEIVMTQLHAGGK.F<br>R.AAEWLNAER.A<br>R.SEVYLKDDSALENYLDGGIDALMLETGGAR.S<br>R.MTEWLEENPAYK.A<br>K.NVTEFDKELEHR.Y<br>K.IVIMTDADVGAHIR.T<br>R.LMGDEVEPR.R |
| YP_617992 | Sala_2954 | major facilitator superfamily MFS_1                       | 8.50%             | 2                       | R.TTPVAALLDPAGEPPENR.<br>R.SAAPALEDAASPLR.R                                                                                                                                                                                                                                                                                                                                                                                                                                                                                                                                                                                                                                                                                                                                                                                                                                                                                                                                                                                                                                                                                                                                                                                                                                                                                                                                                                                                                                                                                                                                                                                                                                                                                                                                                                                                                                                                                                                                                                                                                                                                                                                                                                                                                                                                                                                                                                                                                                                                                                                                                                                                                                                                                                                                                                                                                                                                                                                                                                                                                                                                                                                                                                                                                                                                                                                                                                       |
| YP_617994 | Sala_2956 | putative transmembrane anti-sigma factor                  | 21.70%            | 3                       | R.ALLTGAQEPPIVDITSLAAR.R<br>K.LVAHYAPVAEALPDRR.A<br>R.EAASDPALAEAR.H                                                                                                                                                                                                                                                                                                                                                                                                                                                                                                                                                                                                                                                                                                                                                                                                                                                                                                                                                                                                                                                                                                                                                                                                                                                                                                                                                                                                                                                                                                                                                                                                                                                                                                                                                                                                                                                                                                                                                                                                                                                                                                                                                                                                                                                                                                                                                                                                                                                                                                                                                                                                                                                                                                                                                                                                                                                                                                                                                                                                                                                                                                                                                                                                                                                                                                                                              |
| YP_617995 | Sala_2957 | RNA polymerase, sigma-24 subunit, ECF subfamily           | 27.16%            | 3                       | R.EAAELDVPIGTVSR.L<br>R.GVHDVIDEAVTQIAGDGAAVEAGALR.S<br>R.RGVHDVIDEAVTQIAGDGAAVEAGALR.S                                                                                                                                                                                                                                                                                                                                                                                                                                                                                                                                                                                                                                                                                                                                                                                                                                                                                                                                                                                                                                                                                                                                                                                                                                                                                                                                                                                                                                                                                                                                                                                                                                                                                                                                                                                                                                                                                                                                                                                                                                                                                                                                                                                                                                                                                                                                                                                                                                                                                                                                                                                                                                                                                                                                                                                                                                                                                                                                                                                                                                                                                                                                                                                                                                                                                                                           |
| YP_617997 | Sala_2959 | hypothetical protein                                      | 9.71%             | 2                       | R.GAAATATGTAQGAAGAVR.D<br>R.AAEEQSAAPPAR.S                                                                                                                                                                                                                                                                                                                                                                                                                                                                                                                                                                                                                                                                                                                                                                                                                                                                                                                                                                                                                                                                                                                                                                                                                                                                                                                                                                                                                                                                                                                                                                                                                                                                                                                                                                                                                                                                                                                                                                                                                                                                                                                                                                                                                                                                                                                                                                                                                                                                                                                                                                                                                                                                                                                                                                                                                                                                                                                                                                                                                                                                                                                                                                                                                                                                                                                                                                        |
| YP_617999 | Sala_2961 | putative acyl-carrier protein                             | 31.43%            | 6                       | R.AELPPTLFGAPILVDR.G<br>K.EVAPVILPGPGLTGGAAQALIGIGWQLTSK.A<br>R.GDVAAPLIYTALDYLSDR.D<br>R.KTAIVVAPGR.G<br>R.GQPTVSELDGADR.F<br>R.FADLADFDQR.R<br>R.SEATDIFLSQTSR.Q<br>R.LYGHAGSDVQGAFLPK.A<br>R.TPAGWIEAQFR.H<br>R.WLGPVDTKLVAAVGGAK.R<br>R.VVVFEPALYMR.D<br>R.DLHEEGGLWTSIYEPAGEGTPIR.F<br>R.ANSPSDERK.A<br>R.DIRGIIAVPSNGR.D<br>R.ADAPDGAIGLSR.S<br>K.ALIEADEARDPLLK.G<br>R.QVPGQPTMDMLSFASSEDPISGGR.H<br>R.IAADDSPFLGR.A<br>K.GAALMIEGQWMSAADVADAVQEIATLAR.Q<br>R.ITGSQSEALMVFVEQTPDKK.I<br>R.GEAATLFFSNGQYTNPMVIR.I<br>R.EIVVAGEDVGP.K<br>K.FLGALEGR.L<br>R.LLWALADLMAHR.E<br>R.GEGFTIGSSGHEGNAVAVALR.A<br>R.FGVGVHGDGDLAIVTYGNGYLSR.Q<br>K.VIGSKPLAIPQSTIASHLK.A<br>R.SVEQVVAALLER.E<br>R.LAEEVDYIVR.L<br>K.GPIFAELLADEINR.T<br>R.FIVLATQNPKEQGVYLPPEALDR.F<br>R.FNSPAGDFGVTVADAAAAGAAIDVIATVR.L<br>K.LVVDYPADEERR.I<br>K.TLLAQAFAR.A<br>K.TQAALLEAMQER.R<br>K.LVDVYPADEER.R<br>R.VLSAAAEIEGR.S<br>R.IQFTPLMFGDILGSLNLFQTSSTLTK.G<br>R.IQFTPLMFGDILGSLNLFQTSSTLTK.G<br>R.RVTINGEPHVMSPR.F<br>R.ASGLDFGR.I<br>K.GPIFAELLADEINRTPPK.T<br>R.APSGSLNLPQWATLITGEAWQAVR.Q<br>R.AGQEPEDVPPALPAPWDRR.F<br>R.FGVGALYSLGIPR.E<br>R.TIGLDDQLFLGLAIGYADEDAAVNQWVPR.A<br>R.APIDEADWKGFGT.<br>R.APIDEADWK.G<br>R.SVDPALKEIFAAQR.A<br>R.FALETPGGGALTPVQAEIGR.V<br>R.LTSLDGAVSLR.T<br>R.GRFALETPGGGALTPVQAEIGR.V<br>R.TSAGTDQLR.F<br>R.VKDGGTDVYVWAPNETR.A<br>K.DGGTDVYVWAPNETR.A<br>K.FENTSDNAYK.V<br>R.RDFIQNALSVANLDV.<br>R.GHNYGLVEALALNGALDPAALDSAGR.T<br>K.VTPIRSELLEIFAHSR.K<br>R.RLHLLAAEQAEYAHPAR.L<br>K.GHLYAQPPYK.V<br>R.LHLLAAEQAEYAHPAR.L<br>K.GSSAALAAADAALAAEAEDAEDAEASDGLPAATAR.K<br>R.VTFQASTDFK.N<br>R.ELAFNSGVR.I<br>K.WTITAAGGGYVLEK.R<br>R.VEAQELIAHEIFER.L<br>R.GVSDHHAIDAAPLASQEAR.R<br>R.RELAFNSGVR.I<br>R.HAEHVSHDLFYEGGIAAFV.K.Y<br>R.DRHVQAILPK.K<br>R.DGGTHLAAR.A<br>K.TPLPDPJAISSEER.D<br>R.NKTLPPDJAISSEER.D<br>R.FEHGDVAAPLR.V<br>K.EVGTILQALGTGIRDEFNIEK.L<br>R.HVQAILPK.K<br>R.GIPTIHAEEGVSAEIVMTQLHAGGK.F<br>R.AAEWLNAER.A<br>R.SEVYLKDDSALENYLDGGIDALMLETGGAR.S<br>R.MTEWLEENPAYK.A<br>K.NVTEFDKELEHR.Y<br>K.IVIMTDADVGAHIR.T<br>R.LMGDEVEPR.R                                                                                                                                                                                                                                                                                                                                                                                                                                                                                                                                                                                                                                                                                                                                                                                                                                                                                                                                                                                                                                                                                                                                                                                                                                                                                                                                            |
| YP_618000 | Sala_2962 | Transketolase, central region                             | 49.66%            | 21                      | R.GVHDVIDEAVTQIAGDGAAVEAGALR.S<br>R.RGVHDVIDEAVTQIAGDGAAVEAGALR.S<br>R.GAAATATGTAQGAAGAVR.D<br>R.AAEEQSAAPPAR.S<br>R.AELPPTLFGAPILVDR.G<br>K.EVAPVILPGPGLTGGAAQALIGIGWQLTSK.A<br>R.GDVAAPLIYTALDYLSDR.D<br>R.KTAIVVAPGR.G<br>R.GQPTVSELDGADR.F<br>R.FADLADFDQR.R<br>R.SEATDIFLSQTSR.Q<br>R.LYGHAGSDVQGAFLPK.A<br>R.TPAGWIEAQFR.H<br>R.WLGPVDTKLVAAVGGAK.R<br>R.VVVFEPALYMR.D<br>R.DLHEEGGLWTSIYEPAGEGTPIR.F<br>R.ANSPSDERK.A<br>R.DIRGIIAVPSNGR.D<br>R.ADAPDGAIGLSR.S<br>K.ALIEADEARDPLLK.G<br>R.QVPGQPTMDMLSFASSEDPISGGR.H<br>R.IAADDSPFLGR.A<br>K.GAALMIEGQWMSAADVADAVQEIATLAR.Q<br>R.ITGSQSEALMVFVEQTPDKK.I<br>R.GEAATLFFSNGQYTNPMVIR.I<br>R.EIVVAGEDVGP.K<br>K.FLGALEGR.L<br>R.LLWALADLMAHR.E<br>R.GEGFTIGSSGHEGNAVAVALR.A<br>R.FGVGVHGDGDLAIVTYGNGYLSR.Q<br>K.VIGSKPLAIPQSTIASHLK.A<br>R.SVEQVVAALLER.E<br>R.LAEEVDYIVR.L<br>K.GPIFAELLADEINR.T<br>R.FIVLATQNPKEQGVYLPPEALDR.F<br>R.FNSPAGDFGVTVADAAAAGAAIDVIATVR.L<br>K.LVVDYPADEERR.I<br>K.TLLAQAFAR.A<br>K.TQAALLEAMQER.R<br>K.LVDVYPADEER.R<br>R.VLSAAAEIEGR.S<br>R.IQFTPLMFGDILGSLNLFQTSSTLTK.G<br>R.IQFTPLMFGDILGSLNLFQTSSTLTK.G<br>R.RVTINGEPHVMSPR.F<br>R.ASGLDFGR.I<br>K.GPIFAELLADEINRTPPK.T<br>R.APSGSLNLPQWATLITGEAWQAVR.Q<br>R.AGQEPEDVPPALPAPWDRR.F<br>R.FGVGALYSLGIPR.E<br>R.TIGLDDQLFLGLAIGYADEDAAVNQWVPR.A<br>R.APIDEADWKGFGT.<br>R.APIDEADWK.G<br>R.SVDPALKEIFAAQR.A<br>R.FALETPGGGALTPVQAEIGR.V<br>R.LTSLDGAVSLR.T<br>R.GRFALETPGGGALTPVQAEIGR.V<br>R.TSAGTDQLR.F<br>R.VKDGGTDVYVWAPNETR.A<br>K.DGGTDVYVWAPNETR.A<br>K.FENTSDNAYK.V<br>R.RDFIQNALSVANLDV.<br>R.GHNYGLVEALALNGALDPAALDSAGR.T<br>K.VTPIRSELLEIFAHSR.K<br>R.RLHLLAAEQAEYAHPAR.L<br>K.GHLYAQPPYK.V<br>R.LHLLAAEQAEYAHPAR.L<br>K.GSSAALAAADAALAAEAEDAEDAEASDGLPAATAR.K<br>R.VTFQASTDFK.N<br>R.ELAFNSGVR.I<br>K.WTITAAGGGYVLEK.R<br>R.VEAQELIAHEIFER.L<br>R.GVSDHHAIDAAPLASQEAR.R<br>R.RELAFNSGVR.I<br>R.HAEHVSHDLFYEGGIAAFV.K.Y<br>R.DRHVQAILPK.K<br>R.DGGTHLAAR.A<br>K.TPLPDPJAISSEER.D<br>R.NKTLPPDJAISSEER.D<br>R.FEHGDVAAPLR.V<br>K.EVGTILQALGTGIRDEFNIEK.L<br>R.HVQAILPK.K<br>R.GIPTIHAEEGVSAEIVMTQLHAGGK.F<br>R.AAEWLNAER.A<br>R.SEVYLKDDSALENYLDGGIDALMLETGGAR.S<br>R.MTEWLEENPAYK.A<br>K.NVTEFDKELEHR.Y<br>K.IVIMTDADVGAHIR.T<br>R.LMGDEVEPR.R                                                                                                                                                                                                                                                                                                                                                                                                                                                                                                                                                                                                                                                                                                                                                                                                                                                                                                                                                                                                                                                                                                                                                                                                                         |
| YP_618003 | Sala_2965 | ATPase associated with various cellular activities, AAA_3 | 65.44%            | 15                      | R.GVHDVIDEAVTQIAGDGAAVEAGALR.S<br>R.RGVHDVIDEAVTQIAGDGAAVEAGALR.S<br>R.GAAATATGTAQGAAGAVR.D<br>R.AAEEQSAAPPAR.S<br>R.AELPPTLFGAPILVDR.G<br>K.EVAPVILPGPGLTGGAAQALIGIGWQLTSK.A<br>R.GDVAAPLIYTALDYLSDR.D<br>R.KTAIVVAPGR.G<br>R.GQPTVSELDGADR.F<br>R.FADLADFDQR.R<br>R.SEATDIFLSQTSR.Q<br>R.LYGHAGSDVQGAFLPK.A<br>R.TPAGWIEAQFR.H<br>R.WLGPVDTKLVAAVGGAK.R<br>R.VVVFEPALYMR.D<br>R.DLHEEGGLWTSIYEPAGEGTPIR.F<br>R.ANSPSDERK.A<br>R.DIRGIIAVPSNGR.D<br>R.ADAPDGAIGLSR.S<br>K.ALIEADEARDPLLK.G<br>R.QVPGQPTMDMLSFASSEDPISGGR.H<br>R.IAADDSPFLGR.A<br>K.GAALMIEGQWMSAADVADAVQEIATLAR.Q<br>R.ITGSQSEALMVFVEQTPDKK.I<br>R.GEAATLFFSNGQYTNPMVIR.I<br>R.EIVVAGEDVGP.K<br>K.FLGALEGR.L<br>R.LLWALADLMAHR.E<br>R.GEGFTIGSSGHEGNAVAVALR.A<br>R.FGVGVHGDGDLAIVTYGNGYLSR.Q<br>K.VIGSKPLAIPQSTIASHLK.A<br>R.SVEQVVAALLER.E<br>R.LAEEVDYIVR.L<br>K.GPIFAELLADEINR.T<br>R.FIVLATQNPKEQGVYLPPEALDR.F<br>R.FNSPAGDFGVTVADAAAAGAAIDVIATVR.L<br>K.LVVDYPADEERR.I<br>K.TLLAQAFAR.A<br>K.TQAALLEAMQER.R<br>K.LVDVYPADEER.R<br>R.VLSAAAEIEGR.S<br>R.IQFTPLMFGDILGSLNLFQTSSTLTK.G<br>R.IQFTPLMFGDILGSLNLFQTSSTLTK.G<br>R.RVTINGEPHVMSPR.F<br>R.ASGLDFGR.I<br>K.GPIFAELLADEINRTPPK.T<br>R.APSGSLNLPQWATLITGEAWQAVR.Q<br>R.AGQEPEDVPPALPAPWDRR.F<br>R.FGVGALYSLGIPR.E<br>R.TIGLDDQLFLGLAIGYADEDAAVNQWVPR.A<br>R.APIDEADWKGFGT.<br>R.APIDEADWK.G<br>R.SVDPALKEIFAAQR.A<br>R.FALETPGGGALTPVQAEIGR.V<br>R.LTSLDGAVSLR.T<br>R.GRFALETPGGGALTPVQAEIGR.V<br>R.TSAGTDQLR.F<br>R.VKDGGTDVYVWAPNETR.A<br>K.DGGTDVYVWAPNETR.A<br>K.FENTSDNAYK.V<br>R.RDFIQNALSVANLDV.<br>R.GHNYGLVEALALNGALDPAALDSAGR.T<br>K.VTPIRSELLEIFAHSR.K<br>R.RLHLLAAEQAEYAHPAR.L<br>K.GHLYAQPPYK.V<br>R.LHLLAAEQAEYAHPAR.L<br>K.GSSAALAAADAALAAEAEDAEDAEASDGLPAATAR.K<br>R.VTFQASTDFK.N<br>R.ELAFNSGVR.I<br>K.WTITAAGGGYVLEK.R<br>R.VEAQELIAHEIFER.L<br>R.GVSDHHAIDAAPLASQEAR.R<br>R.RELAFNSGVR.I<br>R.HAEHVSHDLFYEGGIAAFV.K.Y<br>R.DRHVQAILPK.K<br>R.DGGTHLAAR.A<br>K.TPLPDPJAISSEER.D<br>R.NKTLPPDJAISSEER.D<br>R.FEHGDVAAPLR.V<br>K.EVGTILQALGTGIRDEFNIEK.L<br>R.HVQAILPK.K<br>R.GIPTIHAEEGVSAEIVMTQLHAGGK.F<br>R.AAEWLNAER.A<br>R.SEVYLKDDSALENYLDGGIDALMLETGGAR.S<br>R.MTEWLEENPAYK.A<br>K.NVTEFDKELEHR.Y<br>K.IVIMTDADVGAHIR.T<br>R.LMGDEVEPR.R                                                                                                                                                                                                                                                                                                                                                                                                                                                                                                                                                                                                                                                                                                                                                                                                                                                                                                                                                                                                                                                                                                                                                                                                                         |
| YP_618007 | Sala_2969 | nitroreductase                                            | 52.34%            | 7                       | R.GVHDVIDEAVTQIAGDGAAVEAGALR.S<br>R.RGVHDVIDEAVTQIAGDGAAVEAGALR.S<br>R.GAAATATGTAQGAAGAVR.D<br>R.AAEEQSAAPPAR.S<br>R.AELPPTLFGAPILVDR.G<br>K.EVAPVILPGPGLTGGAAQALIGIGWQLTSK.A<br>R.GDVAAPLIYTALDYLSDR.D<br>R.KTAIVVAPGR.G<br>R.GQPTVSELDGADR.F<br>R.FADLADFDQR.R<br>R.SEATDIFLSQTSR.Q<br>R.LYGHAGSDVQGAFLPK.A<br>R.TPAGWIEAQFR.H<br>R.WLGPVDTKLVAAVGGAK.R<br>R.VVVFEPALYMR.D<br>R.DLHEEGGLWTSIYEPAGEGTPIR.F<br>R.ANSPSDERK.A<br>R.DIRGIIAVPSNGR.D<br>R.ADAPDGAIGLSR.S<br>K.ALIEADEARDPLLK.G<br>R.QVPGQPTMDMLSFASSEDPISGGR.H<br>R.IAADDSPFLGR.A<br>K.GAALMIEGQWMSAADVADAVQEIATLAR.Q<br>R.ITGSQSEALMVFVEQTPDKK.I<br>R.GEAATLFFSNGQYTNPMVIR.I<br>R.EIVVAGEDVGP.K<br>K.FLGALEGR.L<br>R.LLWALADLMAHR.E<br>R.GEGFTIGSSGHEGNAVAVALR.A<br>R.FGVGVHGDGDLAIVTYGNGYLSR.Q<br>K.VIGSKPLAIPQSTIASHLK.A<br>R.SVEQVVAALLER.E<br>R.LAEEVDYIVR.L<br>K.GPIFAELLADEINR.T<br>R.FIVLATQNPKEQGVYLPPEALDR.F<br>R.FNSPAGDFGVTVADAAAAGAAIDVIATVR.L<br>K.LVVDYPADEERR.I<br>K.TLLAQAFAR.A<br>K.TQAALLEAMQER.R<br>K.LVDVYPADEER.R<br>R.VLSAAAEIEGR.S<br>R.IQFTPLMFGDILGSLNLFQTSSTLTK.G<br>R.IQFTPLMFGDILGSLNLFQTSSTLTK.G<br>R.RVTINGEPHVMSPR.F<br>R.ASGLDFGR.I<br>K.GPIFAELLADEINRTPPK.T<br>R.APSGSLNLPQWATLITGEAWQAVR.Q<br>R.AGQEPEDVPPALPAPWDRR.F<br>R.FGVGALYSLGIPR.E<br>R.TIGLDDQLFLGLAIGYADEDAAVNQWVPR.A<br>R.APIDEADWKGFGT.<br>R.APIDEADWK.G<br>R.SVDPALKEIFAAQR.A<br>R.FALETPGGGALTPVQAEIGR.V<br>R.LTSLDGAVSLR.T<br>R.GRFALETPGGGALTPVQAEIGR.V<br>R.TSAGTDQLR.F<br>R.VKDGGTDVYVWAPNETR.A<br>K.DGGTDVYVWAPNETR.A<br>K.FENTSDNAYK.V<br>R.RDFIQNALSVANLDV.<br>R.GHNYGLVEALALNGALDPAALDSAGR.T<br>K.VTPIRSELLEIFAHSR.K<br>R.RLHLLAAEQAEYAHPAR.L<br>K.GHLYAQPPYK.V<br>R.LHLLAAEQAEYAHPAR.L<br>K.GSSAALAAADAALAAEAEDAEDAEASDGLPAATAR.K<br>R.VTFQASTDFK.N<br>R.ELAFNSGVR.I<br>K.WTITAAGGGYVLEK.R<br>R.VEAQELIAHEIFER.L<br>R.GVSDHHAIDAAPLASQEAR.R<br>R.RELAFNSGVR.I<br>R.HAEHVSHDLFYEGGIAAFV.K.Y<br>R.DRHVQAILPK.K<br>R.DGGTHLAAR.A<br>K.TPLPDPJAISSEER.D<br>R.NKTLPPDJAISSEER.D<br>R.FEHGDVAAPLR.V<br>K.EVGTILQALGTGIRDEFNIEK.L<br>R.HVQAILPK.K<br>R.GIPTIHAEEGVSAEIVMTQLHAGGK.F<br>R.AAEWLNAER.A<br>R.SEVYLKDDSALENYLDGGIDALMLETGGAR.S<br>R.MTEWLEENPAYK.A<br>K.NVTEFDKELEHR.Y<br>K.IVIMTDADVGAHIR.T<br>R.LMGDEVEPR.R                                                                                                                                                                                                                                                                                                                                                                                                                                                                                                                                                                                                                                                                                                                                                                                                                                                                                                                                                                                                                                                                                                                                                                                                                         |
| YP_618008 | Sala_2970 | hypothetical protein                                      | 26.35%            | 4                       | R.GVHDVIDEAVTQIAGDGAAVEAGALR.S<br>R.RGVHDVIDEAVTQIAGDGAAVEAGALR.S<br>R.GAAATATGTAQGAAGAVR.D<br>R.AAEEQSAAPPAR.S<br>R.AELPPTLFGAPILVDR.G<br>K.EVAPVILPGPGLTGGAAQALIGIGWQLTSK.A<br>R.GDVAAPLIYTALDYLSDR.D<br>R.KTAIVVAPGR.G<br>R.GQPTVSELDGADR.F<br>R.FADLADFDQR.R<br>R.SEATDIFLSQTSR.Q<br>R.LYGHAGSDVQGAFLPK.A<br>R.TPAGWIEAQFR.H<br>R.WLGPVDTKLVAAVGGAK.R<br>R.VVVFEPALYMR.D<br>R.DLHEEGGLWTSIYEPAGEGTPIR.F<br>R.ANSPSDERK.A<br>R.DIRGIIAVPSNGR.D<br>R.ADAPDGAIGLSR.S<br>K.ALIEADEARDPLLK.G<br>R.QVPGQPTMDMLSFASSEDPISGGR.H<br>R.IAADDSPFLGR.A<br>K.GAALMIEGQWMSAADVADAVQEIATLAR.Q<br>R.ITGSQSEALMVFVEQTPDKK.I<br>R.GEAATLFFSNGQYTNPMVIR.I<br>R.EIVVAGEDVGP.K<br>K.FLGALEGR.L<br>R.LLWALADLMAHR.E<br>R.GEGFTIGSSGHEGNAVAVALR.A<br>R.FGVGVHGDGDLAIVTYGNGYLSR.Q<br>K.VIGSKPLAIPQSTIASHLK.A<br>R.SVEQVVAALLER.E<br>R.LAEEVDYIVR.L<br>K.GPIFAELLADEINR.T<br>R.FIVLATQNPKEQGVYLPPEALDR.F<br>R.FNSPAGDFGVTVADAAAAGAAIDVIATVR.L<br>K.LVVDYPADEERR.I<br>K.TLLAQAFAR.A<br>K.TQAALLEAMQER.R<br>K.LVDVYPADEER.R<br>R.VLSAAAEIEGR.S<br>R.IQFTPLMFGDILGSLNLFQTSSTLTK.G<br>R.IQFTPLMFGDILGSLNLFQTSSTLTK.G<br>R.RVTINGEPHVMSPR.F<br>R.ASGLDFGR.I<br>K.GPIFAELLADEINRTPPK.T<br>R.APSGSLNLPQWATLITGEAWQAVR.Q<br>R.AGQEPEDVPPALPAPWDRR.F<br>R.FGVGALYSLGIPR.E<br>R.TIGLDDQLFLGLAIGYADEDAAVNQWVPR.A<br>R.APIDEADWKGFGT.<br>R.APIDEADWK.G<br>R.SVDPALKEIFAAQR.A<br>R.FALETPGGGALTPVQAEIGR.V<br>R.LTSLDGAVSLR.T<br>R.GRFALETPGGGALTPVQAEIGR.V<br>R.TSAGTDQLR.F<br>R.VKDGGTDVYVWAPNETR.A<br>K.DGGTDVYVWAPNETR.A<br>K.FENTSDNAYK.V<br>R.RDFIQNALSVANLDV.<br>R.GHNYGLVEALALNGALDPAALDSAGR.T<br>K.VTPIRSELLEIFAHSR.K<br>R.RLHLLAAEQAEYAHPAR.L<br>K.GHLYAQPPYK.V<br>R.LHLLAAEQAEYAHPAR.L<br>K.GSSAALAAADAALAAEAEDAEDAEASDGLPAATAR.K<br>R.VTFQASTDFK.N<br>R.ELAFNSGVR.I<br>K.WTITAAGGGYVLEK.R<br>R.VEAQELIAHEIFER.L<br>R.GVSDHHAIDAAPLASQEAR.R<br>R.RELAFNSGVR.I<br>R.HAEHVSHDLFYEGGIAAFV.K.Y<br>R.DRHVQAILPK.K<br>R.DGGTHLAAR.A<br>K.TPLPDPJAISSEER.D<br>R.NKTLPPDJAISSEER.D<br>R.FEHGDVAAPLR.V<br>K.EVGTILQALGTGIRDEFNIEK.L<br>R.HVQAILPK.K<br>R.GIPTIHAEEGVSAEIVMTQLHAGGK.F<br>R.AAEWLNAER.A<br>R.SEVYLKDDSALENYLDGGIDALMLETGGAR.S<br>R.MTEWLEENPAYK.A<br>K.NVTEFDKELEHR.Y<br>K.IVIMTDADVGAHIR.T<br>R.LMGDEVEPR.R                                                                                                                                                                                                                                                                                                                                                                                                                                                                                                                                                                                                                                                                                                                                                                                                                                                                                                                                                                                                                                                                                                                                                                                                                         |
| YP_618009 | Sala_2971 | hypothetical protein                                      | 9.64%             | 2                       | R.GVHDVIDEAVTQIAGDGAAVEAGALR.S<br>R.RGVHDVIDEAVTQIAGDGAAVEAGALR.S                                                                                                                                                                                                                                                                                                                                                                                                                                                                                                                                                                                                                                                                                                                                                                                                                                                                                                                                                                                                                                                                                                                                                                                                                                                                                                                                                                                                                                                                                                                                                                                                                                                                                                                                                                                                                                                                                                                                                                                                                                                                                                                                                                                                                                                                                                                                                                                                                                                                                                                                                                                                                                                                                                                                                                                                                                                                                                                                                                                                                                                                                                                                                                                                                                                                                                                                                 |
| YP_618010 | Sala_2972 | DNA gyrase, B subunit                                     | 57.34%            | 39                      | R.GVHDVIDEAVTQIAGDGAAVEAGALR.S<br>R.RGVHDVIDEAVTQIAGDGAAVEAGALR.S<br>R.GAAATATGTAQGAAGAVR.D<br>R.AAEEQSAAPPAR.S<br>R.AELPPTLFGAPILVDR.G<br>K.EVAPVILPGPGLTGGAAQALIGIGWQLTSK.A<br>R.GDVAAPLIYTALDYLSDR.D<br>R.KTAIVVAPGR.G<br>R.GQPTVSELDGADR.F<br>R.FADLADFDQR.R<br>R.SEATDIFLSQTSR.Q<br>R.LYGHAGSDVQGAFLPK.A<br>R.TPAGWIEAQFR.H<br>R.WLGPVDTKLVAAVGGAK.R<br>R.VVVFEPALYMR.D<br>R.DLHEEGGLWTSIYEPAGEGTPIR.F<br>R.ANSPSDERK.A<br>R.DIRGIIAVPSNGR.D<br>R.ADAPDGAIGLSR.S<br>K.ALIEADEARDPLLK.G<br>R.QVPGQPTMDMLSFASSEDPISGGR.H<br>R.IAADDSPFLGR.A<br>K.GAALMIEGQWMSAADVADAVQEIATLAR.Q<br>R.ITGSQSEALMVFVEQTPDKK.I<br>R.GEAATLFFSNGQYTNPMVIR.I<br>R.EIVVAGEDVGP.K<br>K.FLGALEGR.L<br>R.LLWALADLMAHR.E<br>R.GEGFTIGSSGHEGNAVAVALR.A<br>R.FGVGVHGDGDLAIVTYGNGYLSR.Q<br>K.VIGSKPLAIPQSTIASHLK.A<br>R.SVEQVVAALLER.E<br>R.LAEEVDYIVR.L<br>K.GPIFAELLADEINR.T<br>R.FIVLATQNPKEQGVYLPPEALDR.F<br>R.FNSPAGDFGVTVADAAAAGAAIDVIATVR.L<br>K.LVVDYPADEERR.I<br>K.TLLAQAFAR.A<br>K.TQAALLEAMQER.R<br>K.LVDVYPADEER.R<br>R.VLSAAAEIEGR.S<br>R.IQFTPLMFGDILGSLNLFQTSSTLTK.G<br>R.IQFTPLMFGDILGSLNLFQTSSTLTK.G<br>R.RVTINGEPHVMSPR.F<br>R.ASGLDFGR.I<br>K.GPIFAELLADEINRTPPK.T<br>R.APSGSLNLPQWATLITGEAWQAVR.Q<br>R.AGQEPEDVPPALPAPWDRR.F<br>R.FGVGALYSLGIPR.E<br>R.TIGLDDQLFLGLAIGYADEDAAVNQWVPR.A<br>R.APIDEADWKGFGT.<br>R.APIDEADWK.G<br>R.SVDPALKEIFAAQR.A<br>R.FALETPGGGALTPVQAEIGR.V<br>R.LTSLDGAVSLR.T<br>R.GRFALETPGGGALTPVQAEIGR.V<br>R.TSAGTDQLR.F<br>R.VKDGGTDVYVWAPNETR.A<br>K.DGGTDVYVWAPNETR.A<br>K.FENTSDNAYK.V<br>R.RDFIQNALSVANLDV.<br>R.GHNYGLVEALALNGALDPAALDSAGR.T<br>K.VTPIRSELLEIFAHSR.K<br>R.RLHLLAAEQAEYAHPAR.L<br>K.GHLYAQPPYK.V<br>R.LHLLAAEQAEYAHPAR.L<br>K.GSSAALAAADAALAAEAEDAEDAEASDGLPAATAR.K<br>R.VTFQASTDFK.N<br>R.ELAFNSGVR.I<br>K.WTITAAGGGYVLEK.R<br>R.VEAQELIAHEIFER.L<br>R.GVSDHHAIDAAPLASQEAR.R<br>R.RELAFNSGVR.I<br>R.HAEHVSHDLFYEGGIAAFV.K.Y<br>R.DRHVQAILPK.K<br>R.DGGTHLAAR.A<br>K.TPLPDPJAISSEER.D<br>R.NKTLPPDJAISSEER.D<br>R.FEHGDVAAPLR.V<br>K.EVGTILQALGTGIRDEFNIEK.L<br>R.HVQAILPK.K<br>R.GIPTIHAEEGVSAEIVMTQLHAGGK.F<br>R.AAEWLNAER.A<br>R.SEVYLKDDSALENYLDGGIDALMLETGGAR.S<br>R.MTEWLEENPAYK.A<br>K.NVTEFDKELEHR.Y<br>K.IVIMTDADVGAHIR.T<br>R.LMGDEVEPR.R                                                                                                                                                                                                                                                                                                                                                                                                                                                                                                                                                                                                                                                                                                                                                                                                                                                                                                                                                                                                                                                                                                                                                                                                                         |

| Accession | Locus tag | Description                                   | Sequence coverage | No. peptides identified | List of peptides identified                                                                                                                                                                                                                                                                                                                                                                                                                                                                                                                                                                                                                                                                                                                                                                                                                                                                                                                                                                                                                                                                                                                                                                                                                                                                                                                                                                                                                                                                                                                                                                                                                                                                                                                                                                                                                                                                                                                                                                                                                                                                                                                                                                                                                                                                                                                                                                                                                                                                                                                                                                                                                                                                                                                                                                                                                                                                                                                                                                                                                                                                                                                                                                                                                                                                                                                                                                                                                                                                              |
|-----------|-----------|-----------------------------------------------|-------------------|-------------------------|----------------------------------------------------------------------------------------------------------------------------------------------------------------------------------------------------------------------------------------------------------------------------------------------------------------------------------------------------------------------------------------------------------------------------------------------------------------------------------------------------------------------------------------------------------------------------------------------------------------------------------------------------------------------------------------------------------------------------------------------------------------------------------------------------------------------------------------------------------------------------------------------------------------------------------------------------------------------------------------------------------------------------------------------------------------------------------------------------------------------------------------------------------------------------------------------------------------------------------------------------------------------------------------------------------------------------------------------------------------------------------------------------------------------------------------------------------------------------------------------------------------------------------------------------------------------------------------------------------------------------------------------------------------------------------------------------------------------------------------------------------------------------------------------------------------------------------------------------------------------------------------------------------------------------------------------------------------------------------------------------------------------------------------------------------------------------------------------------------------------------------------------------------------------------------------------------------------------------------------------------------------------------------------------------------------------------------------------------------------------------------------------------------------------------------------------------------------------------------------------------------------------------------------------------------------------------------------------------------------------------------------------------------------------------------------------------------------------------------------------------------------------------------------------------------------------------------------------------------------------------------------------------------------------------------------------------------------------------------------------------------------------------------------------------------------------------------------------------------------------------------------------------------------------------------------------------------------------------------------------------------------------------------------------------------------------------------------------------------------------------------------------------------------------------------------------------------------------------------------------------------|
|           |           |                                               |                   |                         | K.QPNANAYGADSIK.V<br>K.GAMDIASLPGK.L<br>K.DKLVSSSEVR.Q<br>R.YKGLGEMNAEQWLETTLDPSNR.S<br>R.DFIQTNALSVANLDV.<br>K.GLGEMNAEQWLETTLDPSNR.S<br>R.TLLTFFYR.Q<br>R.MTEWLEENPAYAK.A<br>R.EGLTAVSVK.L<br>K.WITTAGSGVYTLKRW.W<br>K.YTDHKGDIYR.C<br>R.TKYDSGSGWPSYAPANAEEVTEHR.D<br>R.CATCEGLHGHVFPDGGPTGLR.Y<br>R.GSTLDPWVAAGITDLLQTAVENTGTGR.A<br>R.GGVSVQPYGITR.V<br>R.YSPTADQALGR.A<br>R.VPPRPAPVPEAD<br>R.SAFAYSVNTVAAL.L<br>R.AAVFAVENYGTGR.R<br>R.AADGTVFLSLGPNYGR.W<br>R.DVYTSNYNR.A<br>R.AATASIQANTPPVQVQALVSLDRDGAVR.A<br>R.ERQASNNK.S<br>K.LGDEIGFSAVANMAR.R<br>R.LLGLTGTPEQIAAAK.A<br>R.VAPLFTVDPAR.D<br>R.IGGPFTLDQNGR.T<br>K.AFYVTNKVPGSAPDR.Y<br>R.VAPLFTVDPADTPEALKPFVAR.Y<br>R.DTPEALKPFVAR.Y<br>K.ATSALQDDPTLINTR.N<br>R.TGQLLALLDQADADAPK.R<br>R.TGQLLALLDQADADAPK.E<br>R.GGYFLQAVENR.D<br>R.GGYFLQAVENRDNK.A<br>R.NVDGTETALMIVTK.R<br>R.RGETALILAVQSK.N<br>R.GANPKTDHVAGMSAR.D<br>R.NGMTPLMHAALLNYTDGADELLK.Q<br>R.GETALILAVQSK.N<br>R.EYGFYFGRN.<br>R.DGNKATSALQDDPTLINTR.N<br>K.APVQANR.R<br>R.TGQLLALLDQADADAPKREYGFYFGRN.<br>R.NVDGTETALMIVTK.R<br>K.REYGFYFGRN.<br>R.GANPKTDHVAGMSAR.D<br>R.DDRGTQLLALLDQADADAPK.R<br>K.GADPAJADRNGMPLMHAALLNYTDGADELLK.Q<br>K.GADPAIADR.N<br>K.IGTIADLIAYR.N<br>R.EGYVTTGISAGDR.A<br>R.AGHTASVDIAR.L<br>K.GRDDIVTPGHVFLIAR.D<br>R.LDDLIPFAR.R<br>R.DLDSPGWNPETAETLR.K<br>R.HETAFTTSIEAR.E<br>K.GPVDPDGVTLVR.M<br>R.AAGLHANSLS.D<br>R.NKIDGSVNLQK.G<br>R.KLENWLANGSDLSPMASPEEIIAEAR.N<br>R.AIVADGTMRS.S<br>R.VDALGLELMSR.N<br>R.TVAVAIDASK.G<br>R.AIVADGTMRS.S<br>R.NWGTREHATFTTSIEAR.E<br>R.MFLVDDDEHRENGDLVIAQMATPDAINFMATHGR.G<br>R.SALDAEGHSHETVTVGALVEPAIAALAADSGR.F<br>R.GETHYFEVVSNEAR.G<br>R.FYSHLNDMLLDGVR.S<br>R.LSPNGDQGVDSAPER.L<br>R.DNSLRDDYGGPVENR.I<br>R.AGFDGVQLHGANGYLIDQFLR.D<br>R.VVHVSFNDKPPVSASATR.A<br>R.TGAEWAADNPQTWYSPGEGYIDYVPLEAA.<br>R.IVAQLWHMGR.V<br>R.LEYEVARPLEGPEIR.V<br>R.AGPGFVPELAR.E<br>R.EVTEALISVWGADR.V<br>R.GPLILNSDYTAALAEIASGIADAIAGFR.P<br>R.PFIANPDLVER.I<br>R.IRTGAEWAADNPQTWYSPGEGYIDYVPLEAA.<br>K.RAGFDGVQLHGANGYLIDQFLR.D<br>R.DDYGGPVENR.I<br>R.LFPIAAAALDALGIAFLELREPGDGTGFR.T<br>R.GPLILNSDYTAALAEIASGIADAIAGFRPFIANPDLVER.I<br>R.AALAPLIAASAAFDGFPALDDAAR.R<br>R.AALAPLIAASAAFDGFPALDDAARR.T<br>R.DMVDWAFADIDAR.M<br>R.ATDFMYSK.R<br>R.ALALLALFNGNAPHAAL.L<br>R.EAAAGPANDSALHQR.A<br>K.APEGSSQVDYSIAGR.I<br>R.GLADLLAAVDAAIR.S<br>K.SSLFNALTGAR.Q<br>K.IANFYGVTVR.K<br>R.LSHELGVPIVTVAVR.K<br>K.AGHASFADGRPLSLIDLPGTYSLTPASLDEAVTR.D<br>R.IASGLEAVTPIGFNHDIALLIPAMAAR.E<br>R.AAIVSETPVR.R<br>K.VILIGNLADPEIK.S<br>R.TEWHNVINGEGLGVVER.Y<br>R.IATSEQWKR.M<br>K.ERTEWHNVINGEGLGVVER.Y<br>R.GGGGDSWNQGGSSGGWQGGSSGGGGGAPGGRRPFDLDDDDVDF.<br>K.VYVEGSLR.T<br>K.LTVEAPALAPHIAPK.G<br>K.VGDELGGHVTGHVDAVGR.I<br>R.DADGWFVAVDASAETLAR.T<br>R.MFTGIITDIGTIR.S<br>R.IVAVEPVGDSVK.L<br>R.MFTGIITDIGTIR.S<br>K.GRDADGWFVAVDASAETLAR.T<br>R.ALKVGDELGGHVTGHVDAVGR.I<br>K.AQIYFENWTADR.S<br>K.VDVGGLSDFWAYIR.E<br>R.FADSLGEYDSTEADRVTR.E<br>R.ETLGEAAEAVK.Q<br>R.GTLYLVDSGGQYADGTTDITR.T<br>R.DQVDSGLFDYVGVVQSSVAEWLGSVSAQGR.V<br>R.HAWLTFGGSGAGTAAVLFK.A<br>R.GEDVSHTPVGLAFALLHADATADLFIAEK.I<br>R.VGYDPWLHGIDWVR.G<br>R.SAFEGALAGLAGK.K<br>K.WMEEVAPQGGDELGAALK.L<br>R.DLVDSLLSSAEADWLDAYHAAVFEK.L<br>R.AVAIIFALENAGVQVER.H<br>R.CSQDLIAR.Q<br>K.GASLVAVDKNPDAWDDQAPSNAPVSYDTALAGQSAVEK.R<br>R.GLDGFIVPISDEHMSEYVYAYQR.M<br>K.VAVDPDRAVAIIFALENAGVQVER.H<br>K.NQVELSSTR.A<br>R.TIAGPAPSAEHR.R<br>R.QYLWADQVYAGHTGHGVGTYLAVHGPQR.I<br>R.IAKPAGGQAGTEPLHAGMILSNPEYK.A<br>K.GLDTVMTALDSIAWTFNIR.G<br>K.GHIALATAR.F |
| YP_618013 | Sala_2975 | Protein-methionine-S-oxide reductase          | 42.96%            | 3                       |                                                                                                                                                                                                                                                                                                                                                                                                                                                                                                                                                                                                                                                                                                                                                                                                                                                                                                                                                                                                                                                                                                                                                                                                                                                                                                                                                                                                                                                                                                                                                                                                                                                                                                                                                                                                                                                                                                                                                                                                                                                                                                                                                                                                                                                                                                                                                                                                                                                                                                                                                                                                                                                                                                                                                                                                                                                                                                                                                                                                                                                                                                                                                                                                                                                                                                                                                                                                                                                                                                          |
| YP_618014 | Sala_2976 | Penicillin-binding protein 1A                 | 22.95%            | 11                      |                                                                                                                                                                                                                                                                                                                                                                                                                                                                                                                                                                                                                                                                                                                                                                                                                                                                                                                                                                                                                                                                                                                                                                                                                                                                                                                                                                                                                                                                                                                                                                                                                                                                                                                                                                                                                                                                                                                                                                                                                                                                                                                                                                                                                                                                                                                                                                                                                                                                                                                                                                                                                                                                                                                                                                                                                                                                                                                                                                                                                                                                                                                                                                                                                                                                                                                                                                                                                                                                                                          |
| YP_618017 | Sala_2979 | electron transport protein SCO1/SenC          | 32.09%            | 6                       |                                                                                                                                                                                                                                                                                                                                                                                                                                                                                                                                                                                                                                                                                                                                                                                                                                                                                                                                                                                                                                                                                                                                                                                                                                                                                                                                                                                                                                                                                                                                                                                                                                                                                                                                                                                                                                                                                                                                                                                                                                                                                                                                                                                                                                                                                                                                                                                                                                                                                                                                                                                                                                                                                                                                                                                                                                                                                                                                                                                                                                                                                                                                                                                                                                                                                                                                                                                                                                                                                                          |
| YP_618018 | Sala_2980 | Ankyrin                                       | 80.29%            | 20                      |                                                                                                                                                                                                                                                                                                                                                                                                                                                                                                                                                                                                                                                                                                                                                                                                                                                                                                                                                                                                                                                                                                                                                                                                                                                                                                                                                                                                                                                                                                                                                                                                                                                                                                                                                                                                                                                                                                                                                                                                                                                                                                                                                                                                                                                                                                                                                                                                                                                                                                                                                                                                                                                                                                                                                                                                                                                                                                                                                                                                                                                                                                                                                                                                                                                                                                                                                                                                                                                                                                          |
| YP_618019 | Sala_2981 | 3,4-dihydroxy-2-butanone 4-phosphate synthase | 52.12%            | 17                      |                                                                                                                                                                                                                                                                                                                                                                                                                                                                                                                                                                                                                                                                                                                                                                                                                                                                                                                                                                                                                                                                                                                                                                                                                                                                                                                                                                                                                                                                                                                                                                                                                                                                                                                                                                                                                                                                                                                                                                                                                                                                                                                                                                                                                                                                                                                                                                                                                                                                                                                                                                                                                                                                                                                                                                                                                                                                                                                                                                                                                                                                                                                                                                                                                                                                                                                                                                                                                                                                                                          |
| YP_618020 | Sala_2982 | Riboflavin synthase                           | 43.97%            | 3                       |                                                                                                                                                                                                                                                                                                                                                                                                                                                                                                                                                                                                                                                                                                                                                                                                                                                                                                                                                                                                                                                                                                                                                                                                                                                                                                                                                                                                                                                                                                                                                                                                                                                                                                                                                                                                                                                                                                                                                                                                                                                                                                                                                                                                                                                                                                                                                                                                                                                                                                                                                                                                                                                                                                                                                                                                                                                                                                                                                                                                                                                                                                                                                                                                                                                                                                                                                                                                                                                                                                          |
| YP_618022 | Sala_2984 | NADH:flavin oxidoreductase/NADH oxidase       | 63.71%            | 16                      |                                                                                                                                                                                                                                                                                                                                                                                                                                                                                                                                                                                                                                                                                                                                                                                                                                                                                                                                                                                                                                                                                                                                                                                                                                                                                                                                                                                                                                                                                                                                                                                                                                                                                                                                                                                                                                                                                                                                                                                                                                                                                                                                                                                                                                                                                                                                                                                                                                                                                                                                                                                                                                                                                                                                                                                                                                                                                                                                                                                                                                                                                                                                                                                                                                                                                                                                                                                                                                                                                                          |
| YP_618023 | Sala_2985 | RpsU-divergently transcribed                  | 23.64%            | 5                       |                                                                                                                                                                                                                                                                                                                                                                                                                                                                                                                                                                                                                                                                                                                                                                                                                                                                                                                                                                                                                                                                                                                                                                                                                                                                                                                                                                                                                                                                                                                                                                                                                                                                                                                                                                                                                                                                                                                                                                                                                                                                                                                                                                                                                                                                                                                                                                                                                                                                                                                                                                                                                                                                                                                                                                                                                                                                                                                                                                                                                                                                                                                                                                                                                                                                                                                                                                                                                                                                                                          |
| YP_618025 | Sala_2987 | ferrous iron transport protein B              | 25.04%            | 9                       |                                                                                                                                                                                                                                                                                                                                                                                                                                                                                                                                                                                                                                                                                                                                                                                                                                                                                                                                                                                                                                                                                                                                                                                                                                                                                                                                                                                                                                                                                                                                                                                                                                                                                                                                                                                                                                                                                                                                                                                                                                                                                                                                                                                                                                                                                                                                                                                                                                                                                                                                                                                                                                                                                                                                                                                                                                                                                                                                                                                                                                                                                                                                                                                                                                                                                                                                                                                                                                                                                                          |
| YP_618026 | Sala_2988 | single-strand binding protein                 | 59.54%            | 6                       |                                                                                                                                                                                                                                                                                                                                                                                                                                                                                                                                                                                                                                                                                                                                                                                                                                                                                                                                                                                                                                                                                                                                                                                                                                                                                                                                                                                                                                                                                                                                                                                                                                                                                                                                                                                                                                                                                                                                                                                                                                                                                                                                                                                                                                                                                                                                                                                                                                                                                                                                                                                                                                                                                                                                                                                                                                                                                                                                                                                                                                                                                                                                                                                                                                                                                                                                                                                                                                                                                                          |
| YP_618028 | Sala_2990 | riboflavin synthase, alpha subunit            | 40.49%            | 8                       |                                                                                                                                                                                                                                                                                                                                                                                                                                                                                                                                                                                                                                                                                                                                                                                                                                                                                                                                                                                                                                                                                                                                                                                                                                                                                                                                                                                                                                                                                                                                                                                                                                                                                                                                                                                                                                                                                                                                                                                                                                                                                                                                                                                                                                                                                                                                                                                                                                                                                                                                                                                                                                                                                                                                                                                                                                                                                                                                                                                                                                                                                                                                                                                                                                                                                                                                                                                                                                                                                                          |
| YP_618030 | Sala_2992 | hypothetical protein                          | 38.31%            | 4                       |                                                                                                                                                                                                                                                                                                                                                                                                                                                                                                                                                                                                                                                                                                                                                                                                                                                                                                                                                                                                                                                                                                                                                                                                                                                                                                                                                                                                                                                                                                                                                                                                                                                                                                                                                                                                                                                                                                                                                                                                                                                                                                                                                                                                                                                                                                                                                                                                                                                                                                                                                                                                                                                                                                                                                                                                                                                                                                                                                                                                                                                                                                                                                                                                                                                                                                                                                                                                                                                                                                          |
| YP_618032 | Sala_2994 | peptidase M24                                 | 83.72%            | 33                      |                                                                                                                                                                                                                                                                                                                                                                                                                                                                                                                                                                                                                                                                                                                                                                                                                                                                                                                                                                                                                                                                                                                                                                                                                                                                                                                                                                                                                                                                                                                                                                                                                                                                                                                                                                                                                                                                                                                                                                                                                                                                                                                                                                                                                                                                                                                                                                                                                                                                                                                                                                                                                                                                                                                                                                                                                                                                                                                                                                                                                                                                                                                                                                                                                                                                                                                                                                                                                                                                                                          |

| Accession | Locus tag | Description                                              | Sequence coverage | No. peptides identified | List of peptides identified                                                                                                                                                                                                                                                                                                                                                                                                                                                                                                                                                                                                                                                                                                                                                                                                                                                                                                                                                                                                                                                                                                                                                                                                                                                                                                                                                                                                                                                                                                                                                                                                                                                                                                                                                                                                                                                                                                                                                                                                                                                                                                                                                                                                                                                                                                                                                                                                                                                                                                                                                                                                                                                                                                                                                                                                                                                                                                                                                                                                                                                                                                                                                                                                                                                                                                                                                  |
|-----------|-----------|----------------------------------------------------------|-------------------|-------------------------|------------------------------------------------------------------------------------------------------------------------------------------------------------------------------------------------------------------------------------------------------------------------------------------------------------------------------------------------------------------------------------------------------------------------------------------------------------------------------------------------------------------------------------------------------------------------------------------------------------------------------------------------------------------------------------------------------------------------------------------------------------------------------------------------------------------------------------------------------------------------------------------------------------------------------------------------------------------------------------------------------------------------------------------------------------------------------------------------------------------------------------------------------------------------------------------------------------------------------------------------------------------------------------------------------------------------------------------------------------------------------------------------------------------------------------------------------------------------------------------------------------------------------------------------------------------------------------------------------------------------------------------------------------------------------------------------------------------------------------------------------------------------------------------------------------------------------------------------------------------------------------------------------------------------------------------------------------------------------------------------------------------------------------------------------------------------------------------------------------------------------------------------------------------------------------------------------------------------------------------------------------------------------------------------------------------------------------------------------------------------------------------------------------------------------------------------------------------------------------------------------------------------------------------------------------------------------------------------------------------------------------------------------------------------------------------------------------------------------------------------------------------------------------------------------------------------------------------------------------------------------------------------------------------------------------------------------------------------------------------------------------------------------------------------------------------------------------------------------------------------------------------------------------------------------------------------------------------------------------------------------------------------------------------------------------------------------------------------------------------------------|
| YP_618033 | Sala_2995 | Oligopeptidase B                                         | 64.06%            | 27                      | R.SAFEGALAGLGGK.V<br>R.EAGGALKDLSFDITSAAGPINALPHYK.V<br>K.PAGGGAGTEEPHAGMILSNPEGYK.A<br>K.KVAVDPDR.A<br>K.DLSFDITSAAGPINALPHYK.V<br>R.IENLVVVPQEDGAEEMLFGETITFAPAR.D<br>R.HRDPVAVLPK.A<br>K.NPVDAAWDDQAPSNAPVSVYDTALAGQSAVEK.R<br>K.DLSFDITSAAGPINALPHYKVDETTNR.R<br>R.IAKPAGGGAGTEEPHAGMILSNPEGYK.A<br>R.GLDGFIIVPISDEHMSEYVGAQAQR.M<br>R.DWLAACAAPLDR.T<br>K.WMEEVAPQGGDELGAALK.L<br>K.LSPGMDEAMRDWLAACAAPLDR.T<br>K.VQEIIPGYSQDYITTEVVSPLSR.D<br>K.TLSDPWFWR.D<br>K.AAFDYMVSPYDVAQA.A<br>R.IATASIDKPGEWTTLIPGSDHSYITGLSIFR.D<br>R.TNTFNDFDVAK.G<br>R.TNDSLLLR.T<br>R.DPGYPTIDDADILDYVK.A<br>R.RYDAPLTPGR.I<br>R.LAEVSVSPDGK.L<br>R.EDGLDQVDR.R<br>R.WGALREDAEYAVLTLQGVK.<br>R.GMIYIAHVR.G<br>K.EADIGFVGIK.T<br>R.IKEDSSVPQK.D<br>R.DYFVLEAR.E<br>R.YDAPLTPGR.I<br>K.LDGSAPMHLVYGSYGR.V<br>K.AENYFDAAMKPHADLVTLFQEMK.G<br>R.LDYESMTPDYVDYVAVSGTLETLK.V<br>R.IRFPYATYVAGLDNPEYHQDK.L<br>R.EGLYHTNDEHPNR.I<br>R.NLETGELLDPVPTLSSLVWTANNDAIYGLANENWR.T<br>R.KPVAGGETQLLDEVAMSDGKDYFR.L<br>K.AYPPMLVAGLNDPR.V<br>R.VPPGFSTTR.L<br>K.TAANDYVIATGDNETSEVLLPADNPEAPMQLVSPR.R<br>K.LMAFSDNCSER.F<br>R.FGIDPAGALFDDVAANVAGAETAGIAGR.F<br>R.FNETIPGIPGSLLEVER.L<br>R.VLFDWDLR.H<br>R.FVDAALER.E<br>R.FRDIVSGTEK.M<br>R.LIDAYAR.F<br>R.FGGSPVQAVPDLVVR.R<br>R.YYNELAAGAAK.S<br>K.LSAEFGDIAR.R<br>K.AWLSEQLAGANWLV.R.A<br>R.AADDHGVAEHR.A<br>R.AILGLGYPOETSFR.G<br>R.ALANPSIILLDEPFAGIDPLSISDIR.D<br>R.RLEELDEFGLTR.L<br>R.GIGVITDHNVR.E<br>R.EDAATGNGLAVISIAK.S<br>K.VLLAGSAPAEVADPEVR.R<br>R.LRDAAMALSGER.R<br>R.VVLSVSLVSGK.G<br>R.VVLSVSLVSGKGEVGLLPGAGK.T<br>R.GMTVAQNIKAVLEAEPKVAR.E<br>R.ALANPSIILLDEPFAGIDPLSISDIRDLVADLK.T<br>R.LEELDEFGLTR.L<br>R.ASNITQDVLVAR.A<br>R.YGYDAPYAAAR.L<br>K.FAIVDEVLD.R.L<br>R.IGWDAGNAGAPVIEK.L<br>R.GVVGDTLSEKDAYAIGR.S<br>R.LVEGVGGAFR.I<br>R.VMTDDGWWLLR.A<br>R.IGEMAAAGDWEAGETAEI.R.I<br>R.LLVAIDQLAQSGVAR.G<br>R.IDIVDAYVDR.L<br>K.ASQALFDR.V<br>R.AEAVDEAALAR.L<br>R.IGAIIDQGR.V<br>R.LIEAATK.L<br>R.VAQLGGTPLMWK.T<br>R.IDIVDAYVDR.LVEGVGGAFR.I<br>R.GGMAMPVNTPEMR.F<br>K.SLDFGVAFDGDDR.I<br>R.VMTDDGWWLLR.A<br>R.VIWDGQLLQYAAAVLTDLPATVIADVK.A<br>R.KFAIVDEVLD.R.L<br>R.IGWDAGNAGAPVIEK.L<br>R.IGEMAAAGDWEAGETAEI.R.IDIVDAYVDR.L<br>R.FQVDEVK.F<br>R.VGEALQLSR.R<br>R.LTEGADYFADTPGRDDVFR.H<br>R.VAGIDLDR.Q<br>R.TIDWILL.N<br>R.ELFPAGLTLDDK.A<br>R.RVGEALQLSR.R<br>R.LQHVDAHNR.R<br>R.DIELPFPQFVFGSITTELDTQVAR.L<br>K.AHLGGMGIGHVAR.Q<br>K.AIADGADVETLAR.A<br>R.AEAAIVGGFSDVYVALADADSLER.L<br>R.NAVLSAEQR.T<br>R.VADHVVSIFVNTQFGPNEDFAAYPR.D<br>R.EADGLALSSR.N<br>R.DLDFGIDLAPAR.E<br>K.RVADHVVSIFVNTQFGPNEDFAAYPR.D<br>K.LGVFNVSAPGTDQAK.V<br>R.AAVGVAVLPLGAAVEADAVAVRPA.<br>K.IAELGLELPK.P<br>R.VALMLVAIQGALGGDWAR.V<br>R.DGQVTRG.L<br>K.VANGASELFEKLFGEVGR.H<br>K.VANGASELFEK.L<br>K.IAELGLELPKPAAPVAAYPAVEHGGMVVYSGQLPFR.D<br>R.LIEQYRPPVAVFIDDLAGHHR.S<br>R.LHFVGEPAIAGK.I<br>R.IEDASFANAK.R<br>R.IDQLALHDFHAPVIGSR.G<br>R.LAEKIPAPAPQV.<br>R.SVAEEAPEVWR.L<br>K.IAASPHAHAR.I<br>R.QYPIPGALAAAMAAGAEADIVLTVNGPEHQQR.I<br>R.QYPIPGALAAAMAAGAEADIVLTVNGPEHQQR.I<br>R.IYEGTTIQQLVIK.N<br>R.YITNAPFADVILVIMAR.T<br>K.SILFGTEQQK.A<br>K.NAHVSAFLVPR.D<br>R.ELVAPAPYR.S<br>R.DAPVSIKHPDGK.M<br>K.AFGERTIASFOLQMLADSK.A<br>R.VVQIHGGAGYK.E<br>R.LSVAASVGYK.R<br>K.MGQAGSQIADVILEHDVHVDGALLGEEGIGFR.A<br>R.LIPAEDQLEELGRVDDILAEMR.D<br>R.AAMQSLDNGR.L<br>R.AFDHLLCQLR.S<br>R.SGFDWAEAVEAATDAIR.A<br>R.AEQFLADTER.A<br>R.GNVAALLAMAEKLR.R |
| YP_618035 | Sala_2997 | HAD-superfamily hydrolase subfamily 1A, variant 3        | 41.38%            | 6                       | R.FGIDPAGALFDDVAANVAGAETAGIAGR.F<br>R.FNETIPGIPGSLLEVER.L<br>R.VLFDWDLR.H<br>R.FVDAALER.E<br>R.FRDIVSGTEK.M<br>R.LIDAYAR.F<br>R.FGGSPVQAVPDLVVR.R<br>R.YYNELAAGAAK.S<br>K.LSAEFGDIAR.R<br>K.AWLSEQLAGANWLV.R.A<br>R.AADDHGVAEHR.A<br>R.AILGLGYPOETSFR.G<br>R.ALANPSIILLDEPFAGIDPLSISDIR.D<br>R.RLEELDEFGLTR.L<br>R.GIGVITDHNVR.E<br>R.EDAATGNGLAVISIAK.S<br>K.VLLAGSAPAEVADPEVR.R<br>R.LRDAAMALSGER.R<br>R.VVLSVSLVSGK.G<br>R.VVLSVSLVSGKGEVGLLPGAGK.T<br>R.GMTVAQNIKAVLEAEPKVAR.E<br>R.ALANPSIILLDEPFAGIDPLSISDIRDLVADLK.T<br>R.LEELDEFGLTR.L<br>R.ASNITQDVLVAR.A<br>R.YGYDAPYAAAR.L<br>K.FAIVDEVLD.R.L<br>R.IGWDAGNAGAPVIEK.L<br>R.GVVGDTLSEKDAYAIGR.S<br>R.LVEGVGGAFR.I<br>R.VMTDDGWWLLR.A<br>R.IGEMAAAGDWEAGETAEI.R.I<br>R.LLVAIDQLAQSGVAR.G<br>R.IDIVDAYVDR.L<br>K.ASQALFDR.V<br>R.AEAVDEAALAR.L<br>R.IGAIIDQGR.V<br>R.LIEAATK.L<br>R.VAQLGGTPLMWK.T<br>R.IDIVDAYVDR.LVEGVGGAFR.I<br>R.GGMAMPVNTPEMR.F<br>K.SLDFGVAFDGDDR.I<br>R.VMTDDGWWLLR.A<br>R.VIWDGQLLQYAAAVLTDLPATVIADVK.A<br>R.KFAIVDEVLD.R.L<br>R.IGWDAGNAGAPVIEK.L<br>R.IGEMAAAGDWEAGETAEI.R.IDIVDAYVDR.L<br>R.FQVDEVK.F<br>R.VGEALQLSR.R<br>R.LTEGADYFADTPGRDDVFR.H<br>R.VAGIDLDR.Q<br>R.TIDWILL.N<br>R.ELFPAGLTLDDK.A<br>R.RVGEALQLSR.R<br>R.LQHVDAHNR.R<br>R.DIELPFPQFVFGSITTELDTQVAR.L<br>K.AHLGGMGIGHVAR.Q<br>K.AIADGADVETLAR.A<br>R.AEAAIVGGFSDVYVALADADSLER.L<br>R.NAVLSAEQR.T<br>R.VADHVVSIFVNTQFGPNEDFAAYPR.D<br>R.EADGLALSSR.N<br>R.DLDFGIDLAPAR.E<br>K.RVADHVVSIFVNTQFGPNEDFAAYPR.D<br>K.LGVFNVSAPGTDQAK.V<br>R.AAVGVAVLPLGAAVEADAVAVRPA.<br>K.IAELGLELPK.P<br>R.VALMLVAIQGALGGDWAR.V<br>R.DGQVTRG.L<br>K.VANGASELFEKLFGEVGR.H<br>K.VANGASELFEK.L<br>K.IAELGLELPKPAAPVAAYPAVEHGGMVVYSGQLPFR.D<br>R.LIEQYRPPVAVFIDDLAGHHR.S<br>R.LHFVGEPAIAGK.I<br>R.IEDASFANAK.R<br>R.IDQLALHDFHAPVIGSR.G<br>R.LAEKIPAPAPQV.<br>R.SVAEEAPEVWR.L<br>K.IAASPHAHAR.I<br>R.QYPIPGALAAAMAAGAEADIVLTVNGPEHQQR.I<br>R.QYPIPGALAAAMAAGAEADIVLTVNGPEHQQR.I<br>R.IYEGTTIQQLVIK.N<br>R.YITNAPFADVILVIMAR.T<br>K.SILFGTEQQK.A<br>K.NAHVSAFLVPR.D<br>R.ELVAPAPYR.S<br>R.DAPVSIKHPDGK.M<br>K.AFGERTIASFOLQMLADSK.A<br>R.VVQIHGGAGYK.E<br>R.LSVAASVGYK.R<br>K.MGQAGSQIADVILEHDVHVDGALLGEEGIGFR.A<br>R.LIPAEDQLEELGRVDDILAEMR.D<br>R.AAMQSLDNGR.L<br>R.AFDHLLCQLR.S<br>R.SGFDWAEAVEAATDAIR.A<br>R.AEQFLADTER.A<br>R.GNVAALLAMAEKLR.R                                                                                                                                                                                                                                                                                                                                                                                                                                                                                                                                                                                                                                                                                                                                                                                                                                                                                                                                                                                                                                                                                               |
| YP_618037 | Sala_2999 | RNA polymerase, sigma 54 subunit, RpoN                   | 10.95%            | 4                       | R.FGGSPVQAVPDLVVR.R<br>R.YYNELAAGAAK.S<br>K.LSAEFGDIAR.R<br>K.AWLSEQLAGANWLV.R.A<br>R.AADDHGVAEHR.A<br>R.AILGLGYPOETSFR.G<br>R.ALANPSIILLDEPFAGIDPLSISDIR.D<br>R.RLEELDEFGLTR.L<br>R.GIGVITDHNVR.E<br>R.EDAATGNGLAVISIAK.S<br>K.VLLAGSAPAEVADPEVR.R<br>R.LRDAAMALSGER.R<br>R.VVLSVSLVSGK.G<br>R.VVLSVSLVSGKGEVGLLPGAGK.T<br>R.GMTVAQNIKAVLEAEPKVAR.E<br>R.ALANPSIILLDEPFAGIDPLSISDIRDLVADLK.T<br>R.LEELDEFGLTR.L<br>R.ASNITQDVLVAR.A<br>R.YGYDAPYAAAR.L<br>K.FAIVDEVLD.R.L<br>R.IGWDAGNAGAPVIEK.L<br>R.GVVGDTLSEKDAYAIGR.S<br>R.LVEGVGGAFR.I<br>R.VMTDDGWWLLR.A<br>R.IGEMAAAGDWEAGETAEI.R.I<br>R.LLVAIDQLAQSGVAR.G<br>R.IDIVDAYVDR.L<br>K.ASQALFDR.V<br>R.AEAVDEAALAR.L<br>R.IGAIIDQGR.V<br>R.LIEAATK.L<br>R.VAQLGGTPLMWK.T<br>R.IDIVDAYVDR.LVEGVGGAFR.I<br>R.GGMAMPVNTPEMR.F<br>K.SLDFGVAFDGDDR.I<br>R.VMTDDGWWLLR.A<br>R.VIWDGQLLQYAAAVLTDLPATVIADVK.A<br>R.KFAIVDEVLD.R.L<br>R.IGWDAGNAGAPVIEK.L<br>R.IGEMAAAGDWEAGETAEI.R.IDIVDAYVDR.L<br>R.FQVDEVK.F<br>R.VGEALQLSR.R<br>R.LTEGADYFADTPGRDDVFR.H<br>R.VAGIDLDR.Q<br>R.TIDWILL.N<br>R.ELFPAGLTLDDK.A<br>R.RVGEALQLSR.R<br>R.LQHVDAHNR.R<br>R.DIELPFPQFVFGSITTELDTQVAR.L<br>K.AHLGGMGIGHVAR.Q<br>K.AIADGADVETLAR.A<br>R.AEAAIVGGFSDVYVALADADSLER.L<br>R.NAVLSAEQR.T<br>R.VADHVVSIFVNTQFGPNEDFAAYPR.D<br>R.EADGLALSSR.N<br>R.DLDFGIDLAPAR.E<br>K.RVADHVVSIFVNTQFGPNEDFAAYPR.D<br>K.LGVFNVSAPGTDQAK.V<br>R.AAVGVAVLPLGAAVEADAVAVRPA.<br>K.IAELGLELPK.P<br>R.VALMLVAIQGALGGDWAR.V<br>R.DGQVTRG.L<br>K.VANGASELFEKLFGEVGR.H<br>K.VANGASELFEK.L<br>K.IAELGLELPKPAAPVAAYPAVEHGGMVVYSGQLPFR.D<br>R.LIEQYRPPVAVFIDDLAGHHR.S<br>R.LHFVGEPAIAGK.I<br>R.IEDASFANAK.R<br>R.IDQLALHDFHAPVIGSR.G<br>R.LAEKIPAPAPQV.<br>R.SVAEEAPEVWR.L<br>K.IAASPHAHAR.I<br>R.QYPIPGALAAAMAAGAEADIVLTVNGPEHQQR.I<br>R.QYPIPGALAAAMAAGAEADIVLTVNGPEHQQR.I<br>R.IYEGTTIQQLVIK.N<br>R.YITNAPFADVILVIMAR.T<br>K.SILFGTEQQK.A<br>K.NAHVSAFLVPR.D<br>R.ELVAPAPYR.S<br>R.DAPVSIKHPDGK.M<br>K.AFGERTIASFOLQMLADSK.A<br>R.VVQIHGGAGYK.E<br>R.LSVAASVGYK.R<br>K.MGQAGSQIADVILEHDVHVDGALLGEEGIGFR.A<br>R.LIPAEDQLEELGRVDDILAEMR.D<br>R.AAMQSLDNGR.L<br>R.AFDHLLCQLR.S<br>R.SGFDWAEAVEAATDAIR.A<br>R.AEQFLADTER.A<br>R.GNVAALLAMAEKLR.R                                                                                                                                                                                                                                                                                                                                                                                                                                                                                                                                                                                                                                                                                                                                                                                                                                                                                                                                                                                                                                                                                                                                                                                                                             |
| YP_618038 | Sala_3000 | ABC transporter related                                  | 67.16%            | 13                      | R.AADDHGVAEHR.A<br>R.AILGLGYPOETSFR.G<br>R.ALANPSIILLDEPFAGIDPLSISDIR.D<br>R.RLEELDEFGLTR.L<br>R.GIGVITDHNVR.E<br>R.EDAATGNGLAVISIAK.S<br>K.VLLAGSAPAEVADPEVR.R<br>R.LRDAAMALSGER.R<br>R.VVLSVSLVSGK.G<br>R.VVLSVSLVSGKGEVGLLPGAGK.T<br>R.GMTVAQNIKAVLEAEPKVAR.E<br>R.ALANPSIILLDEPFAGIDPLSISDIRDLVADLK.T<br>R.LEELDEFGLTR.L<br>R.ASNITQDVLVAR.A<br>R.YGYDAPYAAAR.L<br>K.FAIVDEVLD.R.L<br>R.IGWDAGNAGAPVIEK.L<br>R.GVVGDTLSEKDAYAIGR.S<br>R.LVEGVGGAFR.I<br>R.VMTDDGWWLLR.A<br>R.IGEMAAAGDWEAGETAEI.R.I<br>R.LLVAIDQLAQSGVAR.G<br>R.IDIVDAYVDR.L<br>K.ASQALFDR.V<br>R.AEAVDEAALAR.L<br>R.IGAIIDQGR.V<br>R.LIEAATK.L<br>R.VAQLGGTPLMWK.T<br>R.IDIVDAYVDR.LVEGVGGAFR.I<br>R.GGMAMPVNTPEMR.F<br>K.SLDFGVAFDGDDR.I<br>R.VMTDDGWWLLR.A<br>R.VIWDGQLLQYAAAVLTDLPATVIADVK.A<br>R.KFAIVDEVLD.R.L<br>R.IGWDAGNAGAPVIEK.L<br>R.IGEMAAAGDWEAGETAEI.R.IDIVDAYVDR.L<br>R.FQVDEVK.F<br>R.VGEALQLSR.R<br>R.LTEGADYFADTPGRDDVFR.H<br>R.VAGIDLDR.Q<br>R.TIDWILL.N<br>R.ELFPAGLTLDDK.A<br>R.RVGEALQLSR.R<br>R.LQHVDAHNR.R<br>R.DIELPFPQFVFGSITTELDTQVAR.L<br>K.AHLGGMGIGHVAR.Q<br>K.AIADGADVETLAR.A<br>R.AEAAIVGGFSDVYVALADADSLER.L<br>R.NAVLSAEQR.T<br>R.VADHVVSIFVNTQFGPNEDFAAYPR.D<br>R.EADGLALSSR.N<br>R.DLDFGIDLAPAR.E<br>K.RVADHVVSIFVNTQFGPNEDFAAYPR.D<br>K.LGVFNVSAPGTDQAK.V<br>R.AAVGVAVLPLGAAVEADAVAVRPA.<br>K.IAELGLELPK.P<br>R.VALMLVAIQGALGGDWAR.V<br>R.DGQVTRG.L<br>K.VANGASELFEKLFGEVGR.H<br>K.VANGASELFEK.L<br>K.IAELGLELPKPAAPVAAYPAVEHGGMVVYSGQLPFR.D<br>R.LIEQYRPPVAVFIDDLAGHHR.S<br>R.LHFVGEPAIAGK.I<br>R.IEDASFANAK.R<br>R.IDQLALHDFHAPVIGSR.G<br>R.LAEKIPAPAPQV.<br>R.SVAEEAPEVWR.L<br>K.IAASPHAHAR.I<br>R.QYPIPGALAAAMAAGAEADIVLTVNGPEHQQR.I<br>R.QYPIPGALAAAMAAGAEADIVLTVNGPEHQQR.I<br>R.IYEGTTIQQLVIK.N<br>R.YITNAPFADVILVIMAR.T<br>K.SILFGTEQQK.A<br>K.NAHVSAFLVPR.D<br>R.ELVAPAPYR.S<br>R.DAPVSIKHPDGK.M<br>K.AFGERTIASFOLQMLADSK.A<br>R.VVQIHGGAGYK.E<br>R.LSVAASVGYK.R<br>K.MGQAGSQIADVILEHDVHVDGALLGEEGIGFR.A<br>R.LIPAEDQLEELGRVDDILAEMR.D<br>R.AAMQSLDNGR.L<br>R.AFDHLLCQLR.S<br>R.SGFDWAEAVEAATDAIR.A<br>R.AEQFLADTER.A<br>R.GNVAALLAMAEKLR.R                                                                                                                                                                                                                                                                                                                                                                                                                                                                                                                                                                                                                                                                                                                                                                                                                                                                                                                                                                                                                                                                                                                                                                                                                                                                                                                 |
| YP_618039 | Sala_3001 | Phosphomannomutase                                       | 56.52%            | 24                      | R.IGWDAGNAGAPVIEK.L<br>R.GVVGDTLSEKDAYAIGR.S<br>R.LVEGVGGAFR.I<br>R.VMTDDGWWLLR.A<br>R.IGEMAAAGDWEAGETAEI.R.I<br>R.LLVAIDQLAQSGVAR.G<br>R.IDIVDAYVDR.L<br>K.ASQALFDR.V<br>R.AEAVDEAALAR.L<br>R.IGAIIDQGR.V<br>R.LIEAATK.L<br>R.VAQLGGTPLMWK.T<br>R.IDIVDAYVDR.LVEGVGGAFR.I<br>R.GGMAMPVNTPEMR.F<br>K.SLDFGVAFDGDDR.I<br>R.VMTDDGWWLLR.A<br>R.VIWDGQLLQYAAAVLTDLPATVIADVK.A<br>R.KFAIVDEVLD.R.L<br>R.IGWDAGNAGAPVIEK.L<br>R.IGEMAAAGDWEAGETAEI.R.IDIVDAYVDR.L<br>R.FQVDEVK.F<br>R.VGEALQLSR.R<br>R.LTEGADYFADTPGRDDVFR.H<br>R.VAGIDLDR.Q<br>R.TIDWILL.N<br>R.ELFPAGLTLDDK.A<br>R.RVGEALQLSR.R<br>R.LQHVDAHNR.R<br>R.DIELPFPQFVFGSITTELDTQVAR.L<br>K.AHLGGMGIGHVAR.Q<br>K.AIADGADVETLAR.A<br>R.AEAAIVGGFSDVYVALADADSLER.L<br>R.NAVLSAEQR.T<br>R.VADHVVSIFVNTQFGPNEDFAAYPR.D<br>R.EADGLALSSR.N<br>R.DLDFGIDLAPAR.E<br>K.RVADHVVSIFVNTQFGPNEDFAAYPR.D<br>K.LGVFNVSAPGTDQAK.V<br>R.AAVGVAVLPLGAAVEADAVAVRPA.<br>K.IAELGLELPK.P<br>R.VALMLVAIQGALGGDWAR.V<br>R.DGQVTRG.L<br>K.VANGASELFEKLFGEVGR.H<br>K.VANGASELFEK.L<br>K.IAELGLELPKPAAPVAAYPAVEHGGMVVYSGQLPFR.D<br>R.LIEQYRPPVAVFIDDLAGHHR.S<br>R.LHFVGEPAIAGK.I<br>R.IEDASFANAK.R<br>R.IDQLALHDFHAPVIGSR.G<br>R.LAEKIPAPAPQV.<br>R.SVAEEAPEVWR.L<br>K.IAASPHAHAR.I<br>R.QYPIPGALAAAMAAGAEADIVLTVNGPEHQQR.I<br>R.QYPIPGALAAAMAAGAEADIVLTVNGPEHQQR.I<br>R.IYEGTTIQQLVIK.N<br>R.YITNAPFADVILVIMAR.T<br>K.SILFGTEQQK.A<br>K.NAHVSAFLVPR.D<br>R.ELVAPAPYR.S<br>R.DAPVSIKHPDGK.M<br>K.AFGERTIASFOLQMLADSK.A<br>R.VVQIHGGAGYK.E<br>R.LSVAASVGYK.R<br>K.MGQAGSQIADVILEHDVHVDGALLGEEGIGFR.A<br>R.LIPAEDQLEELGRVDDILAEMR.D<br>R.AAMQSLDNGR.L<br>R.AFDHLLCQLR.S<br>R.SGFDWAEAVEAATDAIR.A<br>R.AEQFLADTER.A<br>R.GNVAALLAMAEKLR.R                                                                                                                                                                                                                                                                                                                                                                                                                                                                                                                                                                                                                                                                                                                                                                                                                                                                                                                                                                                                                                                                                                                                                                                                                                                                                                                                                                                                                                                                                                                                                                                                                                                                                                           |
| YP_618040 | Sala_3002 | ATPases involved in chromosome partitioning-like protein | 37.88%            | 9                       | R.VGEALQLSR.R<br>R.LTEGADYFADTPGRDDVFR.H<br>R.VAGIDLDR.Q<br>R.TIDWILL.N<br>R.ELFPAGLTLDDK.A<br>R.RVGEALQLSR.R<br>R.LQHVDAHNR.R<br>R.DIELPFPQFVFGSITTELDTQVAR.L<br>K.AHLGGMGIGHVAR.Q<br>K.AIADGADVETLAR.A<br>R.AEAAIVGGFSDVYVALADADSLER.L<br>R.NAVLSAEQR.T<br>R.VADHVVSIFVNTQFGPNEDFAAYPR.D<br>R.EADGLALSSR.N<br>R.DLDFGIDLAPAR.E<br>K.RVADHVVSIFVNTQFGPNEDFAAYPR.D<br>K.LGVFNVSAPGTDQAK.V<br>R.AAVGVAVLPLGAAVEADAVAVRPA.<br>K.IAELGLELPK.P<br>R.VALMLVAIQGALGGDWAR.V<br>R.DGQVTRG.L<br>K.VANGASELFEKLFGEVGR.H<br>K.VANGASELFEK.L<br>K.IAELGLELPKPAAPVAAYPAVEHGGMVVYSGQLPFR.D<br>R.LIEQYRPPVAVFIDDLAGHHR.S<br>R.LHFVGEPAIAGK.I<br>R.IEDASFANAK.R<br>R.IDQLALHDFHAPVIGSR.G<br>R.LAEKIPAPAPQV.<br>R.SVAEEAPEVWR.L<br>K.IAASPHAHAR.I<br>R.QYPIPGALAAAMAAGAEADIVLTVNGPEHQQR.I<br>R.QYPIPGALAAAMAAGAEADIVLTVNGPEHQQR.I<br>R.IYEGTTIQQLVIK.N<br>R.YITNAPFADVILVIMAR.T<br>K.SILFGTEQQK.A<br>K.NAHVSAFLVPR.D<br>R.ELVAPAPYR.S<br>R.DAPVSIKHPDGK.M<br>K.AFGERTIASFOLQMLADSK.A<br>R.VVQIHGGAGYK.E<br>R.LSVAASVGYK.R<br>K.MGQAGSQIADVILEHDVHVDGALLGEEGIGFR.A<br>R.LIPAEDQLEELGRVDDILAEMR.D<br>R.AAMQSLDNGR.L<br>R.AFDHLLCQLR.S<br>R.SGFDWAEAVEAATDAIR.A<br>R.AEQFLADTER.A<br>R.GNVAALLAMAEKLR.R                                                                                                                                                                                                                                                                                                                                                                                                                                                                                                                                                                                                                                                                                                                                                                                                                                                                                                                                                                                                                                                                                                                                                                                                                                                                                                                                                                                                                                                                                                                                                                                                                                                                                                                                                                                                                                                                                                                                                                                                                                                                                                                                                                                          |
| YP_618041 | Sala_3003 | pantoate--beta-alanine ligase                            | 36.56%            | 7                       | R.AEAAIVGGFSDVYVALADADSLER.L<br>R.NAVLSAEQR.T<br>R.VADHVVSIFVNTQFGPNEDFAAYPR.D<br>R.EADGLALSSR.N<br>R.DLDFGIDLAPAR.E<br>K.RVADHVVSIFVNTQFGPNEDFAAYPR.D<br>K.LGVFNVSAPGTDQAK.V<br>R.AAVGVAVLPLGAAVEADAVAVRPA.<br>K.IAELGLELPK.P<br>R.VALMLVAIQGALGGDWAR.V<br>R.DGQVTRG.L<br>K.VANGASELFEKLFGEVGR.H<br>K.VANGASELFEK.L<br>K.IAELGLELPKPAAPVAAYPAVEHGGMVVYSGQLPFR.D<br>R.LIEQYRPPVAVFIDDLAGHHR.S<br>R.LHFVGEPAIAGK.I<br>R.IEDASFANAK.R<br>R.IDQLALHDFHAPVIGSR.G<br>R.LAEKIPAPAPQV.<br>R.SVAEEAPEVWR.L<br>K.IAASPHAHAR.I<br>R.QYPIPGALAAAMAAGAEADIVLTVNGPEHQQR.I<br>R.QYPIPGALAAAMAAGAEADIVLTVNGPEHQQR.I<br>R.IYEGTTIQQLVIK.N<br>R.YITNAPFADVILVIMAR.T<br>K.SILFGTEQQK.A<br>K.NAHVSAFLVPR.D<br>R.ELVAPAPYR.S<br>R.DAPVSIKHPDGK.M<br>K.AFGERTIASFOLQMLADSK.A<br>R.VVQIHGGAGYK.E<br>R.LSVAASVGYK.R<br>K.MGQAGSQIADVILEHDVHVDGALLGEEGIGFR.A<br>R.LIPAEDQLEELGRVDDILAEMR.D<br>R.AAMQSLDNGR.L<br>R.AFDHLLCQLR.S<br>R.SGFDWAEAVEAATDAIR.A<br>R.AEQFLADTER.A<br>R.GNVAALLAMAEKLR.R                                                                                                                                                                                                                                                                                                                                                                                                                                                                                                                                                                                                                                                                                                                                                                                                                                                                                                                                                                                                                                                                                                                                                                                                                                                                                                                                                                                                                                                                                                                                                                                                                                                                                                                                                                                                                                                                                                                                                                                                                                                                                                                                                                                                                                                                                                                                                                                                      |
| YP_618044 | Sala_3006 | Endoribonuclease L-PSP                                   | 79.87%            | 8                       | R.AAVGVAVLPLGAAVEADAVAVRPA.<br>K.IAELGLELPK.P<br>R.VALMLVAIQGALGGDWAR.V<br>R.DGQVTRG.L<br>K.VANGASELFEKLFGEVGR.H<br>K.VANGASELFEK.L<br>K.IAELGLELPKPAAPVAAYPAVEHGGMVVYSGQLPFR.D<br>R.LIEQYRPPVAVFIDDLAGHHR.S<br>R.LHFVGEPAIAGK.I<br>R.IEDASFANAK.R<br>R.IDQLALHDFHAPVIGSR.G<br>R.LAEKIPAPAPQV.<br>R.SVAEEAPEVWR.L<br>K.IAASPHAHAR.I<br>R.QYPIPGALAAAMAAGAEADIVLTVNGPEHQQR.I<br>R.QYPIPGALAAAMAAGAEADIVLTVNGPEHQQR.I<br>R.IYEGTTIQQLVIK.N<br>R.YITNAPFADVILVIMAR.T<br>K.SILFGTEQQK.A<br>K.NAHVSAFLVPR.D<br>R.ELVAPAPYR.S<br>R.DAPVSIKHPDGK.M<br>K.AFGERTIASFOLQMLADSK.A<br>R.VVQIHGGAGYK.E<br>R.LSVAASVGYK.R<br>K.MGQAGSQIADVILEHDVHVDGALLGEEGIGFR.A<br>R.LIPAEDQLEELGRVDDILAEMR.D<br>R.AAMQSLDNGR.L<br>R.AFDHLLCQLR.S<br>R.SGFDWAEAVEAATDAIR.A<br>R.AEQFLADTER.A<br>R.GNVAALLAMAEKLR.R                                                                                                                                                                                                                                                                                                                                                                                                                                                                                                                                                                                                                                                                                                                                                                                                                                                                                                                                                                                                                                                                                                                                                                                                                                                                                                                                                                                                                                                                                                                                                                                                                                                                                                                                                                                                                                                                                                                                                                                                                                                                                                                                                                                                                                                                                                                                                                                                                                                                                                                                                                                       |
| YP_618045 | Sala_3007 | hypothetical protein                                     | 60.56%            | 9                       | R.LIEQYRPPVAVFIDDLAGHHR.S<br>R.LHFVGEPAIAGK.I<br>R.IEDASFANAK.R<br>R.IDQLALHDFHAPVIGSR.G<br>R.LAEKIPAPAPQV.<br>R.SVAEEAPEVWR.L<br>K.IAASPHAHAR.I<br>R.QYPIPGALAAAMAAGAEADIVLTVNGPEHQQR.I<br>R.QYPIPGALAAAMAAGAEADIVLTVNGPEHQQR.I<br>R.IYEGTTIQQLVIK.N<br>R.YITNAPFADVILVIMAR.T<br>K.SILFGTEQQK.A<br>K.NAHVSAFLVPR.D<br>R.ELVAPAPYR.S<br>R.DAPVSIKHPDGK.M<br>K.AFGERTIASFOLQMLADSK.A<br>R.VVQIHGGAGYK.E<br>R.LSVAASVGYK.R<br>K.MGQAGSQIADVILEHDVHVDGALLGEEGIGFR.A<br>R.LIPAEDQLEELGRVDDILAEMR.D<br>R.AAMQSLDNGR.L<br>R.AFDHLLCQLR.S<br>R.SGFDWAEAVEAATDAIR.A<br>R.AEQFLADTER.A<br>R.GNVAALLAMAEKLR.R                                                                                                                                                                                                                                                                                                                                                                                                                                                                                                                                                                                                                                                                                                                                                                                                                                                                                                                                                                                                                                                                                                                                                                                                                                                                                                                                                                                                                                                                                                                                                                                                                                                                                                                                                                                                                                                                                                                                                                                                                                                                                                                                                                                                                                                                                                                                                                                                                                                                                                                                                                                                                                                                                                                                                                          |
| YP_618048 | Sala_3010 | acyl-CoA dehydrogenase-like protein                      | 48.06%            | 12                      | R.IYEGTTIQQLVIK.N<br>R.YITNAPFADVILVIMAR.T<br>K.SILFGTEQQK.A<br>K.NAHVSAFLVPR.D<br>R.ELVAPAPYR.S<br>R.DAPVSIKHPDGK.M<br>K.AFGERTIASFOLQMLADSK.A<br>R.VVQIHGGAGYK.E<br>R.LSVAASVGYK.R<br>K.MGQAGSQIADVILEHDVHVDGALLGEEGIGFR.A<br>R.LIPAEDQLEELGRVDDILAEMR.D<br>R.AAMQSLDNGR.L<br>R.AFDHLLCQLR.S<br>R.SGFDWAEAVEAATDAIR.A<br>R.AEQFLADTER.A<br>R.GNVAALLAMAEKLR.R                                                                                                                                                                                                                                                                                                                                                                                                                                                                                                                                                                                                                                                                                                                                                                                                                                                                                                                                                                                                                                                                                                                                                                                                                                                                                                                                                                                                                                                                                                                                                                                                                                                                                                                                                                                                                                                                                                                                                                                                                                                                                                                                                                                                                                                                                                                                                                                                                                                                                                                                                                                                                                                                                                                                                                                                                                                                                                                                                                                                              |
| YP_618049 | Sala_3011 | Aspartyl/Asparaginyl beta-hydroxylase                    | 14.73%            | 4                       | R.SGFDWAEAVEAATDAIR.A<br>R.AEQFLADTER.A<br>R.GNVAALLAMAEKLR.R                                                                                                                                                                                                                                                                                                                                                                                                                                                                                                                                                                                                                                                                                                                                                                                                                                                                                                                                                                                                                                                                                                                                                                                                                                                                                                                                                                                                                                                                                                                                                                                                                                                                                                                                                                                                                                                                                                                                                                                                                                                                                                                                                                                                                                                                                                                                                                                                                                                                                                                                                                                                                                                                                                                                                                                                                                                                                                                                                                                                                                                                                                                                                                                                                                                                                                                |



| Accession | Locus tag | Description                                                             | Sequence coverage | No. peptides identified | List of peptides identified                                                                                                                                                                                                                                                                                                                                                                                                                                                                                                                                                                                                                                                                                                                                                                                                                                                                                                                                                                                                                                                                                                                                                                                                                                                                                                                                                                                                                                                                                                                                                                                                                                                                                                                                                                                                                                                                                                                                                                                                                                                                                                                                                                                                                                                                                                                                                                                                                                                                                                                                                                                                                                                                                                                                                                                                                                                                                                                                                                                                                                                                                                                                                                                                           |
|-----------|-----------|-------------------------------------------------------------------------|-------------------|-------------------------|---------------------------------------------------------------------------------------------------------------------------------------------------------------------------------------------------------------------------------------------------------------------------------------------------------------------------------------------------------------------------------------------------------------------------------------------------------------------------------------------------------------------------------------------------------------------------------------------------------------------------------------------------------------------------------------------------------------------------------------------------------------------------------------------------------------------------------------------------------------------------------------------------------------------------------------------------------------------------------------------------------------------------------------------------------------------------------------------------------------------------------------------------------------------------------------------------------------------------------------------------------------------------------------------------------------------------------------------------------------------------------------------------------------------------------------------------------------------------------------------------------------------------------------------------------------------------------------------------------------------------------------------------------------------------------------------------------------------------------------------------------------------------------------------------------------------------------------------------------------------------------------------------------------------------------------------------------------------------------------------------------------------------------------------------------------------------------------------------------------------------------------------------------------------------------------------------------------------------------------------------------------------------------------------------------------------------------------------------------------------------------------------------------------------------------------------------------------------------------------------------------------------------------------------------------------------------------------------------------------------------------------------------------------------------------------------------------------------------------------------------------------------------------------------------------------------------------------------------------------------------------------------------------------------------------------------------------------------------------------------------------------------------------------------------------------------------------------------------------------------------------------------------------------------------------------------------------------------------------------|
| YP_618067 | Sala_3030 | succinate dehydrogenase, cytochrome b subunit                           | 17.01%            | 2                       | R.LNGEAFDGK.L<br>K.DLVGNKNGDPLDAALR.K<br>R.TYGVTLR.G<br>R.QNSTRWALFTHNIVHTDQLDFTFVGR.Y<br>R.FGSQYGR.F<br>R.DISVTPGR.S<br>K.PMDLLLYASYSR.G<br>K.CCAATYVDSVNPFIGLNPNPGVPTPTNNIIR.V                                                                                                                                                                                                                                                                                                                                                                                                                                                                                                                                                                                                                                                                                                                                                                                                                                                                                                                                                                                                                                                                                                                                                                                                                                                                                                                                                                                                                                                                                                                                                                                                                                                                                                                                                                                                                                                                                                                                                                                                                                                                                                                                                                                                                                                                                                                                                                                                                                                                                                                                                                                                                                                                                                                                                                                                                                                                                                                                                                                                                                                      |
| YP_618069 | Sala_3032 | succinate dehydrogenase, flavoprotein subunit                           | 54.47%            | 26                      | K.WTFPMAVSIFHR.V<br>R.HFLDAGAGYELR.T<br>R.LGNSLIDLWVGR.A<br>R.HASGSPITAEVR.T<br>R.LKELLTGAQQPLPK.D<br>K.IIDHIYDVTWVAGGSGLR.A<br>R.GEGGYLTNSSEGR.F<br>R.EAPAAVLELPHAGVPPFR.N<br>R.SQAVLATGGYGR.C<br>R.AGLPLQDMFVQFHPTGIYGAGVLITEGAR.G<br>K.DSADLALR.L<br>K.GSDWLGDDAIEYMVR.E<br>R.TGHAMHLALYQSSLK.Y<br>R.HADIHVSDR.S<br>K.IFAGVTLTR.Q<br>K.HSVAVFDGWGGK.G<br>R.GVGPADHIYHLHDHIDPAVLAER.L<br>K.ELTTPGAAQQPLPK.D<br>R.NADGTIYQRPFGGHMQNMGGPPVQR.T<br>R.AMSAHAAVFR.T<br>R.TDELMAEGK.E<br>R.LPGITESGK.I<br>R.AGLPLQDMFVQFHPTGIYGAGVLITEGAR.G<br>R.NADGTIYQRPFGGHMQNMGGPPVQR.T<br>R.NADGTIYQR.P<br>R.LDYRPVHEYTLSDDAEYIKPK.A<br>R.GVIALCMEDSGSHR.F<br>R.GAHAHEDFNDR.D<br>R.AAQILVDFLPGGAK.V<br>K.AIEQLGFVNPQAR.A<br>K.AIEQLGFVNPQAR.A<br>R.AAQILVDFLPGGAKVDEEDNVLPTLVER.Q<br>K.VDDEDNVLPTLVER.Q<br>K.GFLEALAEAGLTLPELNAPNGNYR.Y<br>R.FADYFYANSQDEAISAYLTSLSAER.A<br>K.IALITENSQAQK.N<br>K.GFGWAAELNLQDVYAK.L<br>K.NVQDQLLA.A<br>K.ASLITYMNGLLAIGLLNSK.A<br>R.VALVTGANTGIGQGFALADAGADIAAAGR.S<br>K.GVNVNAIAPGYIATNTAALQADETR.S<br>R.IDILVNNAGIIR.R<br>R.KADNFAADLSSVAVQPLVDTVLAEFGR.I<br>R.WGDPADIGGAAVFLASR.A<br>R.AGSSFAASGAGDYDWDALDGAALLHLSGITPALGR.S<br>R.DLSLVLGQVFSGEEDR.R<br>R.AVLSELGSDILYGNHR.D<br>K.AGQPSGNTNAWIPDL DAGTALIDLINRPAVLQQEGQR.A<br>R.YNDLTENVDR.L<br>R.NYENNHYGR.T<br>R.LAGLAWTDADR.T<br>R.ITSGNPLDFR.A<br>R.GIDVSNYTIDEDNLIADLDNVYRTER.Y<br>R.DSISAVDVVAEDIAKFPDQNLAESLQR.I<br>K.SNVDYTIAGPLAYDPVDRLEAQAGVYTPQLLNLA.R<br>K.FPVLVDFGQIEDPSSFVLAEFR.D<br>R.FGDFVDPNNGGQAR.V<br>R.VWVGVGIVNPVVPVAVHSFGGWK.R<br>R.APDFETALPSK.H<br>K.AAQPAWAATNPQR.R<br>R.VGVSTDEAHYGPVVEAHK.E<br>K.VIADSKGDIQR.G<br>K.NHGVMPDADLQVNDLTGAAGFSAGER.C<br>K.GEYTGAGPGIDVYSMR.Q<br>R.LVEANMNQLAEMLSSEHGK.V<br>R.VGVSTDEAHYGPVVEAHK.E.V<br>R.QIDHHIVGGAAGSAR.F<br>R.SAFGDTNQHGMGVK.F<br>R.VWVGVGIVNPVVPVAVHSFGGWK.R<br>R.GFTLQHEK.G<br>R.APDFETALPSKHQYGNVAIFR.N<br>R.VQAMGGAK.N<br>K.NHGVMPDADLQVNDLTGAAGFSAGER.C<br>K.FWTKVKTVTAR.W<br>R.VDGTIPPALR.G<br>R.FYESHGELR.V<br>R.KGADLTALTIGATDLR.F<br>R.LTLELVGGQALVR.R<br>R.RLTLELVGGQALVR.R<br>R.FSGEGEEWDR.R<br>R.PAPAESPATAEAAASATDGAR.V<br>R.DAGEGARADAMR.Y<br>K.GADLTALTIGATDLR.F<br>R.MYITDPADADLVGR.A<br>R.NHSSAPFEPVYGYSR.A<br>R.IVNDALQFGGYYLKDYPYER.F<br>R.IVNDALQFGGYYLKD.Y<br>R.DRQFGQVADFNQTFMLADMATDLEAAR.A<br>R.ITPFAENEWEASHYVVDVWK.A<br>K.VTANAPDKSR.F<br>R.FAMAGLDGGR.L<br>R.VHSILEGTNQVMR.M<br>R.VGAEGDGR.F<br>K.AAGELFGAIYVAEESGGIGLGR.L<br>K.VTANAPDK.S<br>K.IASYCLTEPGSGSDAALK.T<br>R.LNIGACSLGGAQR.C<br>R.DGDHYVLNGTK.Q<br>R.CLDEAITYR.D<br>R.ALLYMAAK.V<br>K.RLATDNGSR.I<br>K.RDGDHYVLNGTK.Q<br>K.LGWNASPTAQVIFEDCRVPVENR.V<br>K.DTPGLSFGAPEK.L<br>R.IGGILGELSAVAPPAATR.H<br>R.VGVFLALIGAR.L<br>R.ADDGIEAVTIEHSEGR.G<br>R.FAMPETGIGLFPDVGWYLR.L<br>R.ALIIDKNSPK.W<br>K.WRADDGIEAVTIEHSEGR.G<br>R.LFASDRYEDILAALEADGGEWAER.E<br>R.VWQMHDFIEGVR.A<br>K.EGAVMHDFAENAEQYVIGSR.V<br>R.LDGAELALGLATHYLPSEK.L<br>R.FAMPETGIGLFPDVGWYLR.L<br>K.AIHANLQAMIDALLK.W<br>R.LNHLFTYPK.P<br>R.VVQHESLVDEAVK.T<br>K.AFAGADIK.E<br>R.MMDAEAEER.S<br>K.LGVAPGMGGSQR.L<br>R.LFQILAATEDKAEGMAAFIEK.R<br>R.CAVLTGSGDK.A<br>R.LFQILAATEDKAEGMAAFIEK.R<br>R.GAVTLVLRPQALNALNSGVLDLIAFAAFEADESQR.C<br>R.MTYETLVEGR.G<br>K.EMADKPAADFYLEDFFSK.W<br>K.DMVNAAFETLQGLYER.R<br>K.AVIHAGDAGAGQAAK.I |
| YP_618070 | Sala_3033 | transcriptional regulator, LacI family                                  | 20.80%            | 6                       | R.AAQILVDFLPGGAK.V<br>K.AIEQLGFVNPQAR.A<br>K.AIEQLGFVNPQAR.A<br>R.AAQILVDFLPGGAKVDEEDNVLPTLVER.Q<br>K.VDDEDNVLPTLVER.Q<br>K.GFLEALAEAGLTLPELNAPNGNYR.Y<br>R.FADYFYANSQDEAISAYLTSLSAER.A<br>K.IALITENSQAQK.N<br>K.GFGWAAELNLQDVYAK.L<br>K.NVQDQLLA.A<br>K.ASLITYMNGLLAIGLLNSK.A<br>R.VALVTGANTGIGQGFALADAGADIAAAGR.S<br>K.GVNVNAIAPGYIATNTAALQADETR.S<br>R.IDILVNNAGIIR.R<br>R.KADNFAADLSSVAVQPLVDTVLAEFGR.I<br>R.WGDPADIGGAAVFLASR.A<br>R.AGSSFAASGAGDYDWDALDGAALLHLSGITPALGR.S<br>R.DLSLVLGQVFSGEEDR.R<br>R.AVLSELGSDILYGNHR.D<br>K.AGQPSGNTNAWIPDL DAGTALIDLINRPAVLQQEGQR.A<br>R.YNDLTENVDR.L<br>R.NYENNHYGR.T<br>R.LAGLAWTDADR.T<br>R.ITSGNPLDFR.A<br>R.GIDVSNYTIDEDNLIADLDNVYRTER.Y<br>R.DSISAVDVVAEDIAKFPDQNLAESLQR.I<br>K.SNVDYTIAGPLAYDPVDRLEAQAGVYTPQLLNLA.R<br>K.FPVLVDFGQIEDPSSFVLAEFR.D<br>R.FGDFVDPNNGGQAR.V<br>R.VWVGVGIVNPVVPVAVHSFGGWK.R<br>R.APDFETALPSK.H<br>K.AAQPAWAATNPQR.R<br>R.VGVSTDEAHYGPVVEAHK.E<br>K.VIADSKGDIQR.G<br>K.NHGVMPDADLQVNDLTGAAGFSAGER.C<br>K.GEYTGAGPGIDVYSMR.Q<br>R.LVEANMNQLAEMLSSEHGK.V<br>R.VGVSTDEAHYGPVVEAHK.E.V<br>R.QIDHHIVGGAAGSAR.F<br>R.SAFGDTNQHGMGVK.F<br>R.VWVGVGIVNPVVPVAVHSFGGWK.R<br>R.GFTLQHEK.G<br>R.APDFETALPSKHQYGNVAIFR.N<br>R.VQAMGGAK.N<br>K.NHGVMPDADLQVNDLTGAAGFSAGER.C<br>K.FWTKVKTVTAR.W<br>R.VDGTIPPALR.G<br>R.FYESHGELR.V<br>R.KGADLTALTIGATDLR.F<br>R.LTLELVGGQALVR.R<br>R.RLTLELVGGQALVR.R<br>R.FSGEGEEWDR.R<br>R.PAPAESPATAEAAASATDGAR.V<br>R.DAGEGARADAMR.Y<br>K.GADLTALTIGATDLR.F<br>R.MYITDPADADLVGR.A<br>R.NHSSAPFEPVYGYSR.A<br>R.IVNDALQFGGYYLKDYPYER.F<br>R.IVNDALQFGGYYLKD.Y<br>R.DRQFGQVADFNQTFMLADMATDLEAAR.A<br>R.ITPFAENEWEASHYVVDVWK.A<br>K.VTANAPDKSR.F<br>R.FAMAGLDGGR.L<br>R.VHSILEGTNQVMR.M<br>R.VGAEGDGR.F<br>K.AAGELFGAIYVAEESGGIGLGR.L<br>K.VTANAPDK.S<br>K.IASYCLTEPGSGSDAALK.T<br>R.LNIGACSLGGAQR.C<br>R.DGDHYVLNGTK.Q<br>R.CLDEAITYR.D<br>R.ALLYMAAK.V<br>K.RLATDNGSR.I<br>K.RDGDHYVLNGTK.Q<br>K.LGWNASPTAQVIFEDCRVPVENR.V<br>K.DTPGLSFGAPEK.L<br>R.IGGILGELSAVAPPAATR.H<br>R.VGVFLALIGAR.L<br>R.ADDGIEAVTIEHSEGR.G<br>R.FAMPETGIGLFPDVGWYLR.L<br>R.ALIIDKNSPK.W<br>K.WRADDGIEAVTIEHSEGR.G<br>R.LFASDRYEDILAALEADGGEWAER.E<br>R.VWQMHDFIEGVR.A<br>K.EGAVMHDFAENAEQYVIGSR.V<br>R.LDGAELALGLATHYLPSEK.L<br>R.FAMPETGIGLFPDVGWYLR.L<br>K.AIHANLQAMIDALLK.W<br>R.LNHLFTYPK.P<br>R.VVQHESLVDEAVK.T<br>K.AFAGADIK.E<br>R.MMDAEAEER.S<br>K.LGVAPGMGGSQR.L<br>R.LFQILAATEDKAEGMAAFIEK.R<br>R.CAVLTGSGDK.A<br>R.LFQILAATEDKAEGMAAFIEK.R<br>R.GAVTLVLRPQALNALNSGVLDLIAFAAFEADESQR.C<br>R.MTYETLVEGR.G<br>K.EMADKPAADFYLEDFFSK.W<br>K.DMVNAAFETLQGLYER.R<br>K.AVIHAGDAGAGQAAK.I                                                                                                                                                                                                                                                                                                                                                                                                                                                                                                                                                                                                                                                                    |
| YP_618071 | Sala_3034 | protein of unknown function DUF1124, sugar phosphate isomerase putative | 36.87%            | 5                       | R.AAQILVDFLPGGAK.V<br>K.AIEQLGFVNPQAR.A<br>K.AIEQLGFVNPQAR.A<br>R.AAQILVDFLPGGAKVDEEDNVLPTLVER.Q<br>K.VDDEDNVLPTLVER.Q<br>K.GFLEALAEAGLTLPELNAPNGNYR.Y<br>R.FADYFYANSQDEAISAYLTSLSAER.A<br>K.IALITENSQAQK.N<br>K.GFGWAAELNLQDVYAK.L<br>K.NVQDQLLA.A<br>K.ASLITYMNGLLAIGLLNSK.A<br>R.VALVTGANTGIGQGFALADAGADIAAAGR.S<br>K.GVNVNAIAPGYIATNTAALQADETR.S<br>R.IDILVNNAGIIR.R<br>R.KADNFAADLSSVAVQPLVDTVLAEFGR.I<br>R.WGDPADIGGAAVFLASR.A<br>R.AGSSFAASGAGDYDWDALDGAALLHLSGITPALGR.S<br>R.DLSLVLGQVFSGEEDR.R<br>R.AVLSELGSDILYGNHR.D<br>K.AGQPSGNTNAWIPDL DAGTALIDLINRPAVLQQEGQR.A<br>R.YNDLTENVDR.L<br>R.NYENNHYGR.T<br>R.LAGLAWTDADR.T<br>R.ITSGNPLDFR.A<br>R.GIDVSNYTIDEDNLIADLDNVYRTER.Y<br>R.DSISAVDVVAEDIAKFPDQNLAESLQR.I<br>K.SNVDYTIAGPLAYDPVDRLEAQAGVYTPQLLNLA.R<br>K.FPVLVDFGQIEDPSSFVLAEFR.D<br>R.FGDFVDPNNGGQAR.V<br>R.VWVGVGIVNPVVPVAVHSFGGWK.R<br>R.APDFETALPSK.H<br>K.AAQPAWAATNPQR.R<br>R.VGVSTDEAHYGPVVEAHK.E<br>K.VIADSKGDIQR.G<br>K.NHGVMPDADLQVNDLTGAAGFSAGER.C<br>K.GEYTGAGPGIDVYSMR.Q<br>R.LVEANMNQLAEMLSSEHGK.V<br>R.VGVSTDEAHYGPVVEAHK.E.V<br>R.QIDHHIVGGAAGSAR.F<br>R.SAFGDTNQHGMGVK.F<br>R.VWVGVGIVNPVVPVAVHSFGGWK.R<br>R.GFTLQHEK.G<br>R.APDFETALPSKHQYGNVAIFR.N<br>R.VQAMGGAK.N<br>K.NHGVMPDADLQVNDLTGAAGFSAGER.C<br>K.FWTKVKTVTAR.W<br>R.VDGTIPPALR.G<br>R.FYESHGELR.V<br>R.KGADLTALTIGATDLR.F<br>R.LTLELVGGQALVR.R<br>R.RLTLELVGGQALVR.R<br>R.FSGEGEEWDR.R<br>R.PAPAESPATAEAAASATDGAR.V<br>R.DAGEGARADAMR.Y<br>K.GADLTALTIGATDLR.F<br>R.MYITDPADADLVGR.A<br>R.NHSSAPFEPVYGYSR.A<br>R.IVNDALQFGGYYLKDYPYER.F<br>R.IVNDALQFGGYYLKD.Y<br>R.DRQFGQVADFNQTFMLADMATDLEAAR.A<br>R.ITPFAENEWEASHYVVDVWK.A<br>K.VTANAPDKSR.F<br>R.FAMAGLDGGR.L<br>R.VHSILEGTNQVMR.M<br>R.VGAEGDGR.F<br>K.AAGELFGAIYVAEESGGIGLGR.L<br>K.VTANAPDK.S<br>K.IASYCLTEPGSGSDAALK.T<br>R.LNIGACSLGGAQR.C<br>R.DGDHYVLNGTK.Q<br>R.CLDEAITYR.D<br>R.ALLYMAAK.V<br>K.RLATDNGSR.I<br>K.RDGDHYVLNGTK.Q<br>K.LGWNASPTAQVIFEDCRVPVENR.V<br>K.DTPGLSFGAPEK.L<br>R.IGGILGELSAVAPPAATR.H<br>R.VGVFLALIGAR.L<br>R.ADDGIEAVTIEHSEGR.G<br>R.FAMPETGIGLFPDVGWYLR.L<br>R.ALIIDKNSPK.W<br>K.WRADDGIEAVTIEHSEGR.G<br>R.LFASDRYEDILAALEADGGEWAER.E<br>R.VWQMHDFIEGVR.A<br>K.EGAVMHDFAENAEQYVIGSR.V<br>R.LDGAELALGLATHYLPSEK.L<br>R.FAMPETGIGLFPDVGWYLR.L<br>K.AIHANLQAMIDALLK.W<br>R.LNHLFTYPK.P<br>R.VVQHESLVDEAVK.T<br>K.AFAGADIK.E<br>R.MMDAEAEER.S<br>K.LGVAPGMGGSQR.L<br>R.LFQILAATEDKAEGMAAFIEK.R<br>R.CAVLTGSGDK.A<br>R.LFQILAATEDKAEGMAAFIEK.R<br>R.GAVTLVLRPQALNALNSGVLDLIAFAAFEADESQR.C<br>R.MTYETLVEGR.G<br>K.EMADKPAADFYLEDFFSK.W<br>K.DMVNAAFETLQGLYER.R<br>K.AVIHAGDAGAGQAAK.I                                                                                                                                                                                                                                                                                                                                                                                                                                                                                                                                                                                                                                                                    |
| YP_618072 | Sala_3035 | 2-deoxy-D-gluconate 3-dehydrogenase                                     | 45.42%            | 5                       | R.AAQILVDFLPGGAK.V<br>K.AIEQLGFVNPQAR.A<br>K.AIEQLGFVNPQAR.A<br>R.AAQILVDFLPGGAKVDEEDNVLPTLVER.Q<br>K.VDDEDNVLPTLVER.Q<br>K.GFLEALAEAGLTLPELNAPNGNYR.Y<br>R.FADYFYANSQDEAISAYLTSLSAER.A<br>K.IALITENSQAQK.N<br>K.GFGWAAELNLQDVYAK.L<br>K.NVQDQLLA.A<br>K.ASLITYMNGLLAIGLLNSK.A<br>R.VALVTGANTGIGQGFALADAGADIAAAGR.S<br>K.GVNVNAIAPGYIATNTAALQADETR.S<br>R.IDILVNNAGIIR.R<br>R.KADNFAADLSSVAVQPLVDTVLAEFGR.I<br>R.WGDPADIGGAAVFLASR.A<br>R.AGSSFAASGAGDYDWDALDGAALLHLSGITPALGR.S<br>R.DLSLVLGQVFSGEEDR.R<br>R.AVLSELGSDILYGNHR.D<br>K.AGQPSGNTNAWIPDL DAGTALIDLINRPAVLQQEGQR.A<br>R.YNDLTENVDR.L<br>R.NYENNHYGR.T<br>R.LAGLAWTDADR.T<br>R.ITSGNPLDFR.A<br>R.GIDVSNYTIDEDNLIADLDNVYRTER.Y<br>R.DSISAVDVVAEDIAKFPDQNLAESLQR.I<br>K.SNVDYTIAGPLAYDPVDRLEAQAGVYTPQLLNLA.R<br>K.FPVLVDFGQIEDPSSFVLAEFR.D<br>R.FGDFVDPNNGGQAR.V<br>R.VWVGVGIVNPVVPVAVHSFGGWK.R<br>R.APDFETALPSK.H<br>K.AAQPAWAATNPQR.R<br>R.VGVSTDEAHYGPVVEAHK.E<br>K.VIADSKGDIQR.G<br>K.NHGVMPDADLQVNDLTGAAGFSAGER.C<br>K.GEYTGAGPGIDVYSMR.Q<br>R.LVEANMNQLAEMLSSEHGK.V<br>R.VGVSTDEAHYGPVVEAHK.E.V<br>R.QIDHHIVGGAAGSAR.F<br>R.SAFGDTNQHGMGVK.F<br>R.VWVGVGIVNPVVPVAVHSFGGWK.R<br>R.GFTLQHEK.G<br>R.APDFETALPSKHQYGNVAIFR.N<br>R.VQAMGGAK.N<br>K.NHGVMPDADLQVNDLTGAAGFSAGER.C<br>K.FWTKVKTVTAR.W<br>R.VDGTIPPALR.G<br>R.FYESHGELR.V<br>R.KGADLTALTIGATDLR.F<br>R.LTLELVGGQALVR.R<br>R.RLTLELVGGQALVR.R<br>R.FSGEGEEWDR.R<br>R.PAPAESPATAEAAASATDGAR.V<br>R.DAGEGARADAMR.Y<br>K.GADLTALTIGATDLR.F<br>R.MYITDPADADLVGR.A<br>R.NHSSAPFEPVYGYSR.A<br>R.IVNDALQFGGYYLKDYPYER.F<br>R.IVNDALQFGGYYLKD.Y<br>R.DRQFGQVADFNQTFMLADMATDLEAAR.A<br>R.ITPFAENEWEASHYVVDVWK.A<br>K.VTANAPDKSR.F<br>R.FAMAGLDGGR.L<br>R.VHSILEGTNQVMR.M<br>R.VGAEGDGR.F<br>K.AAGELFGAIYVAEESGGIGLGR.L<br>K.VTANAPDK.S<br>K.IASYCLTEPGSGSDAALK.T<br>R.LNIGACSLGGAQR.C<br>R.DGDHYVLNGTK.Q<br>R.CLDEAITYR.D<br>R.ALLYMAAK.V<br>K.RLATDNGSR.I<br>K.RDGDHYVLNGTK.Q<br>K.LGWNASPTAQVIFEDCRVPVENR.V<br>K.DTPGLSFGAPEK.L<br>R.IGGILGELSAVAPPAATR.H<br>R.VGVFLALIGAR.L<br>R.ADDGIEAVTIEHSEGR.G<br>R.FAMPETGIGLFPDVGWYLR.L<br>R.ALIIDKNSPK.W<br>K.WRADDGIEAVTIEHSEGR.G<br>R.LFASDRYEDILAALEADGGEWAER.E<br>R.VWQMHDFIEGVR.A<br>K.EGAVMHDFAENAEQYVIGSR.V<br>R.LDGAELALGLATHYLPSEK.L<br>R.FAMPETGIGLFPDVGWYLR.L<br>K.AIHANLQAMIDALLK.W<br>R.LNHLFTYPK.P<br>R.VVQHESLVDEAVK.T<br>K.AFAGADIK.E<br>R.MMDAEAEER.S<br>K.LGVAPGMGGSQR.L<br>R.LFQILAATEDKAEGMAAFIEK.R<br>R.CAVLTGSGDK.A<br>R.LFQILAATEDKAEGMAAFIEK.R<br>R.GAVTLVLRPQALNALNSGVLDLIAFAAFEADESQR.C<br>R.MTYETLVEGR.G<br>K.EMADKPAADFYLEDFFSK.W<br>K.DMVNAAFETLQGLYER.R<br>K.AVIHAGDAGAGQAAK.I                                                                                                                                                                                                                                                                                                                                                                                                                                                                                                                                                                                                                                                                    |
| YP_618073 | Sala_3036 | PRB                                                                     | 21.05%            | 3                       | R.AAQILVDFLPGGAK.V<br>K.AIEQLGFVNPQAR.A<br>K.AIEQLGFVNPQAR.A<br>R.AAQILVDFLPGGAKVDEEDNVLPTLVER.Q<br>K.VDDEDNVLPTLVER.Q<br>K.GFLEALAEAGLTLPELNAPNGNYR.Y<br>R.FADYFYANSQDEAISAYLTSLSAER.A<br>K.IALITENSQAQK.N<br>K.GFGWAAELNLQDVYAK.L<br>K.NVQDQLLA.A<br>K.ASLITYMNGLLAIGLLNSK.A<br>R.VALVTGANTGIGQGFALADAGADIAAAGR.S<br>K.GVNVNAIAPGYIATNTAALQADETR.S<br>R.IDILVNNAGIIR.R<br>R.KADNFAADLSSVAVQPLVDTVLAEFGR.I<br>R.WGDPADIGGAAVFLASR.A<br>R.AGSSFAASGAGDYDWDALDGAALLHLSGITPALGR.S<br>R.DLSLVLGQVFSGEEDR.R<br>R.AVLSELGSDILYGNHR.D<br>K.AGQPSGNTNAWIPDL DAGTALIDLINRPAVLQQEGQR.A<br>R.YNDLTENVDR.L<br>R.NYENNHYGR.T<br>R.LAGLAWTDADR.T<br>R.ITSGNPLDFR.A<br>R.GIDVSNYTIDEDNLIADLDNVYRTER.Y<br>R.DSISAVDVVAEDIAKFPDQNLAESLQR.I<br>K.SNVDYTIAGPLAYDPVDRLEAQAGVYTPQLLNLA.R<br>K.FPVLVDFGQIEDPSSFVLAEFR.D<br>R.FGDFVDPNNGGQAR.V<br>R.VWVGVGIVNPVVPVAVHSFGGWK.R<br>R.APDFETALPSK.H<br>K.AAQPAWAATNPQR.R<br>R.VGVSTDEAHYGPVVEAHK.E<br>K.VIADSKGDIQR.G<br>K.NHGVMPDADLQVNDLTGAAGFSAGER.C<br>K.GEYTGAGPGIDVYSMR.Q<br>R.LVEANMNQLAEMLSSEHGK.V<br>R.VGVSTDEAHYGPVVEAHK.E.V<br>R.QIDHHIVGGAAGSAR.F<br>R.SAFGDTNQHGMGVK.F<br>R.VWVGVGIVNPVVPVAVHSFGGWK.R<br>R.GFTLQHEK.G<br>R.APDFETALPSKHQYGNVAIFR.N<br>R.VQAMGGAK.N<br>K.NHGVMPDADLQVNDLTGAAGFSAGER.C<br>K.FWTKVKTVTAR.W<br>R.VDGTIPPALR.G<br>R.FYESHGELR.V<br>R.KGADLTALTIGATDLR.F<br>R.LTLELVGGQALVR.R<br>R.RLTLELVGGQALVR.R<br>R.FSGEGEEWDR.R<br>R.PAPAESPATAEAAASATDGAR.V<br>R.DAGEGARADAMR.Y<br>K.GADLTALTIGATDLR.F<br>R.MYITDPADADLVGR.A<br>R.NHSSAPFEPVYGYSR.A<br>R.IVNDALQFGGYYLKDYPYER.F<br>R.IVNDALQFGGYYLKD.Y<br>R.DRQFGQVADFNQTFMLADMATDLEAAR.A<br>R.ITPFAENEWEASHYVVDVWK.A<br>K.VTANAPDKSR.F<br>R.FAMAGLDGGR.L<br>R.VHSILEGTNQVMR.M<br>R.VGAEGDGR.F<br>K.AAGELFGAIYVAEESGGIGLGR.L<br>K.VTANAPDK.S<br>K.IASYCLTEPGSGSDAALK.T<br>R.LNIGACSLGGAQR.C<br>R.DGDHYVLNGTK.Q<br>R.CLDEAITYR.D<br>R.ALLYMAAK.V<br>K.RLATDNGSR.I<br>K.RDGDHYVLNGTK.Q<br>K.LGWNASPTAQVIFEDCRVPVENR.V<br>K.DTPGLSFGAPEK.L<br>R.IGGILGELSAVAPPAATR.H<br>R.VGVFLALIGAR.L<br>R.ADDGIEAVTIEHSEGR.G<br>R.FAMPETGIGLFPDVGWYLR.L<br>R.ALIIDKNSPK.W<br>K.WRADDGIEAVTIEHSEGR.G<br>R.LFASDRYEDILAALEADGGEWAER.E<br>R.VWQMHDFIEGVR.A<br>K.EGAVMHDFAENAEQYVIGSR.V<br>R.LDGAELALGLATHYLPSEK.L<br>R.FAMPETGIGLFPDVGWYLR.L<br>K.AIHANLQAMIDALLK.W<br>R.LNHLFTYPK.P<br>R.VVQHESLVDEAVK.T<br>K.AFAGADIK.E<br>R.MMDAEAEER.S<br>K.LGVAPGMGGSQR.L<br>R.LFQILAATEDKAEGMAAFIEK.R<br>R.CAVLTGSGDK.A<br>R.LFQILAATEDKAEGMAAFIEK.R<br>R.GAVTLVLRPQALNALNSGVLDLIAFAAFEADESQR.C<br>R.MTYETLVEGR.G<br>K.EMADKPAADFYLEDFFSK.W<br>K.DMVNAAFETLQGLYER.R<br>K.AVIHAGDAGAGQAAK.I                                                                                                                                                                                                                                                                                                                                                                                                                                                                                                                                                                                                                                                                    |
| YP_618078 | Sala_3041 | TonB-dependent receptor                                                 | 21.27%            | 9                       | R.AAQILVDFLPGGAK.V<br>K.AIEQLGFVNPQAR.A<br>K.AIEQLGFVNPQAR.A<br>R.AAQILVDFLPGGAKVDEEDNVLPTLVER.Q<br>K.VDDEDNVLPTLVER.Q<br>K.GFLEALAEAGLTLPELNAPNGNYR.Y<br>R.FADYFYANSQDEAISAYLTSLSAER.A<br>K.IALITENSQAQK.N<br>K.GFGWAAELNLQDVYAK.L<br>K.NVQDQLLA.A<br>K.ASLITYMNGLLAIGLLNSK.A<br>R.VALVTGANTGIGQGFALADAGADIAAAGR.S<br>K.GVNVNAIAPGYIATNTAALQADETR.S<br>R.IDILVNNAGIIR.R<br>R.KADNFAADLSSVAVQPLVDTVLAEFGR.I<br>R.WGDPADIGGAAVFLASR.A<br>R.AGSSFAASGAGDYDWDALDGAALLHLSGITPALGR.S<br>R.DLSLVLGQVFSGEEDR.R<br>R.AVLSELGSDILYGNHR.D<br>K.AGQPSGNTNAWIPDL DAGTALIDLINRPAVLQQEGQR.A<br>R.YNDLTENVDR.L<br>R.NYENNHYGR.T<br>R.LAGLAWTDADR.T<br>R.ITSGNPLDFR.A<br>R.GIDVSNYTIDEDNLIADLDNVYRTER.Y<br>R.DSISAVDVVAEDIAKFPDQNLAESLQR.I<br>K.SNVDYTIAGPLAYDPVDRLEAQAGVYTPQLLNLA.R<br>K.FPVLVDFGQIEDPSSFVLAEFR.D<br>R.FGDFVDPNNGGQAR.V<br>R.VWVGVGIVNPVVPVAVHSFGGWK.R<br>R.APDFETALPSK.H<br>K.AAQPAWAATNPQR.R<br>R.VGVSTDEAHYGPVVEAHK.E<br>K.VIADSKGDIQR.G<br>K.NHGVMPDADLQVNDLTGAAGFSAGER.C<br>K.GEYTGAGPGIDVYSMR.Q<br>R.LVEANMNQLAEMLSSEHGK.V<br>R.VGVSTDEAHYGPVVEAHK.E.V<br>R.QIDHHIVGGAAGSAR.F<br>R.SAFGDTNQHGMGVK.F<br>R.VWVGVGIVNPVVPVAVHSFGGWK.R<br>R.GFTLQHEK.G<br>R.APDFETALPSKHQYGNVAIFR.N<br>R.VQAMGGAK.N<br>K.NHGVMPDADLQVNDLTGAAGFSAGER.C<br>K.FWTKVKTVTAR.W<br>R.VDGTIPPALR.G<br>R.FYESHGELR.V<br>R.KGADLTALTIGATDLR.F<br>R.LTLELVGGQALVR.R<br>R.RLTLELVGGQALVR.R<br>R.FSGEGEEWDR.R<br>R.PAPAESPATAEAAASATDGAR.V<br>R.DAGEGARADAMR.Y<br>K.GADLTALTIGATDLR.F<br>R.MYITDPADADLVGR.A<br>R.NHSSAPFEPVYGYSR.A<br>R.IVNDALQFGGYYLKDYPYER.F<br>R.IVNDALQFGGYYLKD.Y<br>R.DRQFGQVADFNQTFMLADMATDLEAAR.A<br>R.ITPFAENEWEASHYVVDVWK.A<br>K.VTANAPDKSR.F<br>R.FAMAGLDGGR.L<br>R.VHSILEGTNQVMR.M<br>R.VGAEGDGR.F<br>K.AAGELFGAIYVAEESGGIGLGR.L<br>K.VTANAPDK.S<br>K.IASYCLTEPGSGSDAALK.T<br>R.LNIGACSLGGAQR.C<br>R.DGDHYVLNGTK.Q<br>R.CLDEAITYR.D<br>R.ALLYMAAK.V<br>K.RLATDNGSR.I<br>K.RDGDHYVLNGTK.Q<br>K.LGWNASPTAQVIFEDCRVPVENR.V<br>K.DTPGLSFGAPEK.L<br>R.IGGILGELSAVAPPAATR.H<br>R.VGVFLALIGAR.L<br>R.ADDGIEAVTIEHSEGR.G<br>R.FAMPETGIGLFPDVGWYLR.L<br>R.ALIIDKNSPK.W<br>K.WRADDGIEAVTIEHSEGR.G<br>R.LFASDRYEDILAALEADGGEWAER.E<br>R.VWQMHDFIEGVR.A<br>K.EGAVMHDFAENAEQYVIGSR.V<br>R.LDGAELALGLATHYLPSEK.L<br>R.FAMPETGIGLFPDVGWYLR.L<br>K.AIHANLQAMIDALLK.W<br>R.LNHLFTYPK.P<br>R.VVQHESLVDEAVK.T<br>K.AFAGADIK.E<br>R.MMDAEAEER.S<br>K.LGVAPGMGGSQR.L<br>R.LFQILAATEDKAEGMAAFIEK.R<br>R.CAVLTGSGDK.A<br>R.LFQILAATEDKAEGMAAFIEK.R<br>R.GAVTLVLRPQALNALNSGVLDLIAFAAFEADESQR.C<br>R.MTYETLVEGR.G<br>K.EMADKPAADFYLEDFFSK.W<br>K.DMVNAAFETLQGLYER.R<br>K.AVIHAGDAGAGQAAK.I                                                                                                                                                                                                                                                                                                                                                                                                                                                                                                                                                                                                                                                                    |
| YP_618086 | Sala_3049 | methylmalonate-semialdehyde dehydrogenase                               | 47.08%            | 18                      | R.AAQILVDFLPGGAK.V<br>K.AIEQLGFVNPQAR.A<br>K.AIEQLGFVNPQAR.A<br>R.AAQILVDFLPGGAKVDEEDNVLPTLVER.Q<br>K.VDDEDNVLPTLVER.Q<br>K.GFLEALAEAGLTLPELNAPNGNYR.Y<br>R.FADYFYANSQDEAISAYLTSLSAER.A<br>K.IALITENSQAQK.N<br>K.GFGWAAELNLQDVYAK.L<br>K.NVQDQLLA.A<br>K.ASLITYMNGLLAIGLLNSK.A<br>R.VALVTGANTGIGQGFALADAGADIAAAGR.S<br>K.GVNVNAIAPGYIATNTAALQADETR.S<br>R.IDILVNNAGIIR.R<br>R.KADNFAADLSSVAVQPLVDTVLAEFGR.I<br>R.WGDPADIGGAAVFLASR.A<br>R.AGSSFAASGAGDYDWDALDGAALLHLSGITPALGR.S<br>R.DLSLVLGQVFSGEEDR.R<br>R.AVLSELGSDILYGNHR.D<br>K.AGQPSGNTNAWIPDL DAGTALIDLINRPAVLQQEGQR.A<br>R.YNDLTENVDR.L<br>R.NYENNHYGR.T<br>R.LAGLAWTDADR.T<br>R.ITSGNPLDFR.A<br>R.GIDVSNYTIDEDNLIADLDNVYRTER.Y<br>R.DSISAVDVVAEDIAKFPDQNLAESLQR.I<br>K.SNVDYTIAGPLAYDPVDRLEAQAGVYTPQLLNLA.R<br>K.FPVLVDFGQIEDPSSFVLAEFR.D<br>R.FGDFVDPNNGGQAR.V<br>R.VWVGVGIVNPVVPVAVHSFGGWK.R<br>R.APDFETALPSK.H<br>K.AAQPAWAATNPQR.R<br>R.VGVSTDEAHYGPVVEAHK.E<br>K.VIADSKGDIQR.G<br>K.NHGVMPDADLQVNDLTGAAGFSAGER.C<br>K.GEYTGAGPGIDVYSMR.Q<br>R.LVEANMNQLAEMLSSEHGK.V<br>R.VGVSTDEAHYGPVVEAHK.E.V<br>R.QIDHHIVGGAAGSAR.F<br>R.SAFGDTNQHGMGVK.F<br>R.VWVGVGIVNPVVPVAVHSFGGWK.R<br>R.GFTLQHEK.G<br>R.APDFETALPSKHQYGNVAIFR.N<br>R.VQAMGGAK.N<br>K.NHGVMPDADLQVNDLTGAAGFSAGER.C<br>K.FWTKVKTVTAR.W<br>R.VDGTIPPALR.G<br>R.FYESHGELR.V<br>R.KGADLTALTIGATDLR.F<br>R.LTLELVGGQALVR.R<br>R.RLTLELVGGQALVR.R<br>R.FSGEGEEWDR.R<br>R.PAPAESPATAEAAASATDGAR.V<br>R.DAGEGARADAMR.Y<br>K.GADLTALTIGATDLR.F<br>R.MYITDPADADLVGR.A<br>R.NHSSAPFEPVYGYSR.A<br>R.IVNDALQFGGYYLKDYPYER.F<br>R.IVNDALQFGGYYLKD.Y<br>R.DRQFGQVADFNQTFMLADMATDLEAAR.A<br>R.ITPFAENEWEASHYVVDVWK.A<br>K.VTANAPDKSR.F<br>R.FAMAGLDGGR.L<br>R.VHSILEGTNQVMR.M<br>R.VGAEGDGR.F<br>K.AAGELFGAIYVAEESGGIGLGR.L<br>K.VTANAPDK.S<br>K.IASYCLTEPGSGSDAALK.T<br>R.LNIGACSLGGAQR.C<br>R.DGDHYVLNGTK.Q<br>R.CLDEAITYR.D<br>R.ALLYMAAK.V<br>K.RLATDNGSR.I<br>K.RDGDHYVLNGTK.Q<br>K.LGWNASPTAQVIFEDCRVPVENR.V<br>K.DTPGLSFGAPEK.L<br>R.IGGILGELSAVAPPAATR.H<br>R.VGVFLALIGAR.L<br>R.ADDGIEAVTIEHSEGR.G<br>R.FAMPETGIGLFPDVGWYLR.L<br>R.ALIIDKNSPK.W<br>K.WRADDGIEAVTIEHSEGR.G<br>R.LFASDRYEDILAALEADGGEWAER.E<br>R.VWQMHDFIEGVR.A<br>K.EGAVMHDFAENAEQYVIGSR.V<br>R.LDGAELALGLATHYLPSEK.L<br>R.FAMPETGIGLFPDVGWYLR.L<br>K.AIHANLQAMIDALLK.W<br>R.LNHLFTYPK.P<br>R.VVQHESLVDEAVK.T<br>K.AFAGADIK.E<br>R.MMDAEAEER.S<br>K.LGVAPGMGGSQR.L<br>R.LFQILAATEDKAEGMAAFIEK.R<br>R.CAVLTGSGDK.A<br>R.LFQILAATEDKAEGMAAFIEK.R<br>R.GAVTLVLRPQALNALNSGVLDLIAFAAFEADESQR.C<br>R.MTYETLVEGR.G<br>K.EMADKPAADFYLEDFFSK.W<br>K.DMVNAAFETLQGLYER.R<br>K.AVIHAGDAGAGQAAK.I                                                                                                                                                                                                                                                                                                                                                                                                                                                                                                                                                                                                                                                                    |
| YP_618087 | Sala_3050 | hypothetical protein                                                    | 56.21%            | 9                       | R.AAQILVDFLPGGAK.V<br>K.AIEQLGFVNPQAR.A<br>K.AIEQLGFVNPQAR.A<br>R.AAQILVDFLPGGAKVDEEDNVLPTLVER.Q<br>K.VDDEDNVLPTLVER.Q<br>K.GFLEALAEAGLTLPELNAPNGNYR.Y<br>R.FADYFYANSQDEAISAYLTSLSAER.A<br>K.IALITENSQAQK.N<br>K.GFGWAAELNLQDVYAK.L<br>K.NVQDQLLA.A<br>K.ASLITYMNGLLAIGLLNSK.A<br>R.VALVTGANTGIGQGFALADAGADIAAAGR.S<br>K.GVNVNAIAPGYIATNTAALQADETR.S<br>R.IDILVNNAGIIR.R<br>R.KADNFAADLSSVAVQPLVDTVLAEFGR.I<br>R.WGDPADIGGAAVFLASR.A<br>R.AGSSFAASGAGDYDWDALDGAALLHLSGITPALGR.S<br>R.DLSLVLGQVFSGEEDR.R<br>R.AVLSELGSDILYGNHR.D<br>K.AGQPSGNTNAWIPDL DAGTALIDLINRPAVLQQEGQR.A<br>R.YNDLTENVDR.L<br>R.NYENNHYGR.T<br>R.LAGLAWTDADR.T<br>R.ITSGNPLDFR.A<br>R.GIDVSNYTIDEDNLIADLDNVYRTER.Y<br>R.DSISAVDVVAEDIAKFPDQNLAESLQR.I<br>K.SNVDYTIAGPLAYDPVDRLEAQAGVYTPQLLNLA.R<br>K.FPVLVDFGQIEDPSSFVLAEFR.D<br>R.FGDFVDPNNGGQAR.V<br>R.VWVGVGIVNPVVPVAVHSFGGWK.R<br>R.APDFETALPSK.H<br>K.AAQPAWAATNPQR.R<br>R.VGVSTDEAHYGPVVEAHK.E<br>K.VIADSKGDIQR.G<br>K.NHGVMPDADLQVNDLTGAAGFSAGER.C<br>K.GEYTGAGPGIDVYSMR.Q<br>R.LVEANMNQLAEMLSSEHGK.V<br>R.VGVSTDEAHYGPVVEAHK.E.V<br>R.QIDHHIVGGAAGSAR.F<br>R.SAFGDTNQHGMGVK.F<br>R.VWVGVGIVNPVVPVAVHSFGGWK.R<br>R.GFTLQHEK.G<br>R.APDFETALPSKHQYGNVAIFR.N<br>R.VQAMGGAK.N<br>K.NHGVMPDADLQVNDLTGAAGFSAGER.C<br>K.FWTKVKTVTAR.W<br>R.VDGTIPPALR.G<br>R.FYESHGELR.V<br>R.KGADLTALTIGATDLR.F<br>R.LTLELVGGQALVR.R<br>R.RLTLELVGGQALVR.R<br>R.FSGEGEEWDR.R<br>R.PAPAESPATAEAAASATDGAR.V<br>R.DAGEGARADAMR.Y<br>K.GADLTALTIGATDLR.F<br>R.MYITDPADADLVGR.A<br>R.NHSSAPFEPVYGYSR.A<br>R.IVNDALQFGGYYLKDYPYER.F<br>R.IVNDALQFGGYYLKD.Y<br>R.DRQFGQVADFNQTFMLADMATDLEAAR.A<br>R.ITPFAENEWEASHYVVDVWK.A<br>K.VTANAPDKSR.F<br>R.FAMAGLDGGR.L<br>R.VHSILEGTNQVMR.M<br>R.VGAEGDGR.F<br>K.AAGELFGAIYVAEESGGIGLGR.L<br>K.VTANAPDK.S<br>K.IASYCLTEPGSGSDAALK.T<br>R.LNIGACSLGGAQR.C<br>R.DGDHYVLNGTK.Q<br>R.CLDEAITYR.D<br>R.ALLYMAAK.V<br>K.RLATDNGSR.I<br>K.RDGDHYVLNGTK.Q<br>K.LGWNASPTAQVIFEDCRVPVENR.V<br>K.DTPGLSFGAPEK.L<br>R.IGGILGELSAVAPPAATR.H<br>R.VGVFLALIGAR.L<br>R.ADDGIEAVTIEHSEGR.G<br>R.FAMPETGIGLFPDVGWYLR.L<br>R.ALIIDKNSPK.W<br>K.WRADDGIEAVTIEHSEGR.G<br>R.LFASDRYEDILAALEADGGEWAER.E<br>R.VWQMHDFIEGVR.A<br>K.EGAVMHDFAENAEQYVIGSR.V<br>R.LDGAELALGLATHYLPSEK.L<br>R.FAMPETGIGLFPDVGWYLR.L<br>K.AIHANLQAMIDALLK.W<br>R.LNHLFTYPK.P<br>R.VVQHESLVDEAVK.T<br>K.AFAGADIK.E<br>R.MMDAEAEER.S<br>K.LGVAPGMGGSQR.L<br>R.LFQILAATEDKAEGMAAFIEK.R<br>R.CAVLTGSGDK.A<br>R.LFQILAATEDKAEGMAAFIEK.R<br>R.GAVTLVLRPQALNALNSGVLDLIAFAAFEADESQR.C<br>R.MTYETLVEGR.G<br>K.EMADKPAADFYLEDFFSK.W<br>K.DMVNAAFETLQGLYER.R<br>K.AVIHAGDAGAGQAAK.I                                                                                                                                                                                                                                                                                                                                                                                                                                                                                                                                                                                                                                                                    |
| YP_618089 | Sala_3052 | Endoribonuclease L-PSP                                                  | 23.08%            | 2                       | R.AAQILVDFLPGGAK.V                                                                                                                                                                                                                                                                                                                                                                                                                                                                                                                                                                                                                                                                                                                                                                                                                                                                                                                                                                                                                                                                                                                                                                                                                                                                                                                                                                                                                                                                                                                                                                                                                                                                                                                                                                                                                                                                                                                                                                                                                                                                                                                                                                                                                                                                                                                                                                                                                                                                                                                                                                                                                                                                                                                                                                                                                                                                                                                                                                                                                                                                                                                                                                                                                    |



| Accession | Locus tag | Description                                  | Sequence coverage | No. peptides identified | List of peptides identified                                                                                                                                                                                                                                                                                                                                                                                                                                                                                                                                                                                                                                                                                                                                                                                                                                                                                                                                                                                                                                                                                                                                                                                                                                                                                                                                                                                                                                                                                                                                                                                                                                                                                                                                                                                                                                                                                                                                                                                                                                                                                                                                                                                                                                                                                                                                                                                                                                                                                                                                                                                                                                                                                                                                                                                                                                                                                                                                                                                                                                                                                                                                                                                                                                                                              |
|-----------|-----------|----------------------------------------------|-------------------|-------------------------|----------------------------------------------------------------------------------------------------------------------------------------------------------------------------------------------------------------------------------------------------------------------------------------------------------------------------------------------------------------------------------------------------------------------------------------------------------------------------------------------------------------------------------------------------------------------------------------------------------------------------------------------------------------------------------------------------------------------------------------------------------------------------------------------------------------------------------------------------------------------------------------------------------------------------------------------------------------------------------------------------------------------------------------------------------------------------------------------------------------------------------------------------------------------------------------------------------------------------------------------------------------------------------------------------------------------------------------------------------------------------------------------------------------------------------------------------------------------------------------------------------------------------------------------------------------------------------------------------------------------------------------------------------------------------------------------------------------------------------------------------------------------------------------------------------------------------------------------------------------------------------------------------------------------------------------------------------------------------------------------------------------------------------------------------------------------------------------------------------------------------------------------------------------------------------------------------------------------------------------------------------------------------------------------------------------------------------------------------------------------------------------------------------------------------------------------------------------------------------------------------------------------------------------------------------------------------------------------------------------------------------------------------------------------------------------------------------------------------------------------------------------------------------------------------------------------------------------------------------------------------------------------------------------------------------------------------------------------------------------------------------------------------------------------------------------------------------------------------------------------------------------------------------------------------------------------------------------------------------------------------------------------------------------------------------|
| YP_618094 | Sala_3057 | Inorganic diphosphatase                      | 68.54%            | 9                       | R.SNIEATAK.G<br>R.ELYEAFVADKDKGR.D<br>K.GLVAVDAPVSGGIAAANAGTLTFMVGTEEGFAR.A<br>R.ELYEAFVADKDKGRDFAIIR.T<br>R.AYDLSSEALTR.A<br>K.GGFAALMLK.D<br>R.YPANYGFPIHTLGGDGDPLDALVVAR.S<br>R.SPIVAGAVVK.C<br>K.ASGALFVDR.F<br>K.LNGWGDVDEAKR.I<br>R.IDLIPAGDSPDPSLNVLEVPVIGGEPVKYEFDK.A<br>R.IDLIPAGDSPDPSLNVLEVPVIGGEPVK.Y<br>K.LLCVFNK.T<br>K.LNGWGDVDEAKR<br>K.DVASYTDMPPIVQQJEHFFTHYK.D<br>R.DFSGSGLFGTLK.G<br>R.LIFLESGLTFEVQDVPATTGVAR.A<br>R.LSIGLEDPADLIADLER.G<br>R.ASTILYDVTADLK.A<br>R.LGVITTYDPLVGAIAELIRPETR.L<br>R.VLHPALAGDGGHAIWAR.D<br>R.LGGGLVNPVWR.A<br>R.HGENGLVIANWLAAR.G<br>R.WTDPDLV.L<br>R.GVLTMDNTWATLPLPALAHGVDVAMSLTK.Y<br>K.LFGADVALLDGLLAK.W<br>R.SLPHSELFNADGTWK.R<br>R.IVLYDSDPK.S<br>.MDALVSTDWLER.E<br>R.MQSLGLDGSR.I<br>K.DDVAVYDGSWLEWGADAATPK.A<br>R.AEYEAHGIPGAVFMDLADLDTSSAIENMAPPAEK.F<br>.MDALVSTDWLERELGASDLR.V<br>R.TKEQMLANDSGAEQVVDAR.P<br>R.SLPHSELFNADGTWK.G<br>R.TKEQMLANDSGAEQVVDARPAAR.F<br>R.TKEQMLANDSGAEQVVDARPAAR.F<br>R.PGLAPGHIPGSR.S<br>R.MQSLGLDGSR.I<br>.MDALVSTDWLERELGASDLR.V<br>.MDALVSTDWLER.E<br>R.VVPTQPDASTAPAPAR.R<br>R.AAPVGPALDEAPEAAPPR.A<br>R.LQPEDDGRAPGVQPADNGLPPVAPGER.R<br>R.FAADHVAVGFALNLLNQSSEATGLMVR.I<br>R.RAPATDAPR.A<br>R.RGPPPTAPPTAPPTAPPR.P<br>R.IALGQGSAMTEPVLGR.F<br>R.APGVQPADNGLPPVAPGER.R<br>R.GGIPIDVFWQSGPPAGLWLPDQGVAPYR.G<br>R.IGGWYPR.G<br>R.AGELYVR.F<br>R.ERFVGDVAVIER.L<br>K.LLLEGATPAQVDK.V<br>K.HGFEIAPLLK.A<br>R.EITDQEIER.T<br>R.LPFDGLAFER.E<br>K.EMGLVDELAGEDSLAADAIAFAR.A<br>R.VAEIEEPR.K<br>R.GGPMFWAGLEGTDK.I<br>R.ASDIDVWYGYWVYPR.G<br>R.GGPMFWAGLEGTDKIVAALK.H<br>K.LMFGSQSAAQR.H<br>K.LGLLPGAGGTQR.L<br>R.KNYDASAAK.G<br>R.IVGEAATMTSTGDPVPAPK.A<br>K.VGIIGAGTMGGIMMFLQK.G<br>K.RNPSESPR.V<br>K.AKEMGLVDELAGEDSLAADAIAFAR.A<br>K.AALADDVSK.A<br>R.VAEIEEPR.K<br>R.HIFFAER.Q<br>R.GPDFNAVLSIEVASK.P<br>K.TAPDALATAMATGK.K<br>K.NYDASAAK.G<br>K.KQAGFYDYDEK.R<br>K.DGEIAVIIWNPVWALSWHVR.Q<br>R.GFAPYANLACVCAEATR.L<br>R.CAGATTIAGADISEFGKPPR.G<br>K.VAVVAGVCDGFIGNR.M<br>K.TAPDALATAMATGK.I<br>K.REITDQEIER.T<br>K.GIPCTIVEMAQDALDR.G<br>K.AALADDVSKAIVR.C<br>R.LPFDGLAFEREQFMK.L<br>R.IVGEAATMTSTGDPVPAPK.A<br>R.ILEEGKAQR.A<br>R.IENIRDALCAEGR.W<br>K.TAPDALATAMATGK.K<br>K.LLEVVRGEK.T<br>K.IVAALK.H<br>K.EMGLVDELAGEDSLAADAIAFAR.A<br>K.AKEMGLVDELAGEDSLAADAIAFAR.A<br>R.DTGVFVAGGNVFLTRPAQPVR.M<br>R.IEGKPFVQLQR.I<br>R.IFGPLGMVDTGFK.V<br>K.VAADQHR.L<br>R.IDDFDADYTMDSFIAALAK.I<br>R.PGEALKDAIFR.I<br>R.LDRAHAFHK.D<br>R.LDRIPAFLEAK.Y<br>R.HTAGLYGFQER.T<br>K.VAAQQLTSSGVR.V<br>K.VAIIITGAGSGIGR.A<br>R.FGEGTIAVAANISSKDDLQNLVNETR.A<br>K.ATAEAMAEQGA.V<br>R.LIAFLPATLPEQTR.T<br>R.VIDGTASSAHAK.A<br>K.FAGGQSNPTTK.I<br>R.KPFGPLPSAHAVDR.E<br>R.GLLDLSIIAETIPLDR.I<br>K.LGATDVVVALSDDAAK.Q<br>R.IAADPIPEKR.E<br>K.KLGATDVVVALSDDAAK.Q<br>K.GGVVDAIEAVGRPASLAVASLR.R<br>R.LVDVYLR.G<br>R.IADGPDEVHAR.A<br>K.HSPAADPGFSSGDIQVSR.<br>K.TIAEQSIWEQR.I<br>R.TIGVAEEALEK.M<br>R.IERDSDDIINGTK.W<br>K.VQAPNMLQIIDDIAQAHGAGGVSEDFGLAK.A<br>K.VIQVVEDLKAEAK.A<br>K.WWSSGAGDPR.C<br>R.VNAEEAMLLGEGR.G<br>K.AAGIWNLFMPPR.S<br>R.SAFIWNTEPAVASSDATIETRI<br>R.IGFASEVFNCSADPTGNMEVFRH.Y<br>K.VRPAPTYEQDAQDAGDRK.V<br>R.HAQQSMVPLDAPGVTKR.R<br>R.SPLDSFGIWMPLGALLK.F<br>K.AYGGAGLTPER.T<br>K.FGTTEEQKHYLNQIAR.G<br>R.NLTPSPFLTSVGAVALAK.A<br>K.AQQLDEGSEGA.L<br>R.WLPATASGEAIVALAIDEGAK.H<br>K.TDGGITLFAVPK.D |
| YP_618096 | Sala_3059 | cystathionine beta-lyase                     | 44.75%            | 10                      |                                                                                                                                                                                                                                                                                                                                                                                                                                                                                                                                                                                                                                                                                                                                                                                                                                                                                                                                                                                                                                                                                                                                                                                                                                                                                                                                                                                                                                                                                                                                                                                                                                                                                                                                                                                                                                                                                                                                                                                                                                                                                                                                                                                                                                                                                                                                                                                                                                                                                                                                                                                                                                                                                                                                                                                                                                                                                                                                                                                                                                                                                                                                                                                                                                                                                                          |
| YP_618098 | Sala_3061 | 3-mercaptopyruvate sulfurtransferase         | 59.14%            | 16                      |                                                                                                                                                                                                                                                                                                                                                                                                                                                                                                                                                                                                                                                                                                                                                                                                                                                                                                                                                                                                                                                                                                                                                                                                                                                                                                                                                                                                                                                                                                                                                                                                                                                                                                                                                                                                                                                                                                                                                                                                                                                                                                                                                                                                                                                                                                                                                                                                                                                                                                                                                                                                                                                                                                                                                                                                                                                                                                                                                                                                                                                                                                                                                                                                                                                                                                          |
| YP_618099 | Sala_3062 | hypothetical protein                         | 32.56%            | 8                       |                                                                                                                                                                                                                                                                                                                                                                                                                                                                                                                                                                                                                                                                                                                                                                                                                                                                                                                                                                                                                                                                                                                                                                                                                                                                                                                                                                                                                                                                                                                                                                                                                                                                                                                                                                                                                                                                                                                                                                                                                                                                                                                                                                                                                                                                                                                                                                                                                                                                                                                                                                                                                                                                                                                                                                                                                                                                                                                                                                                                                                                                                                                                                                                                                                                                                                          |
| YP_618100 | Sala_3063 | GTP cyclohydrolase I                         | 28.85%            | 3                       |                                                                                                                                                                                                                                                                                                                                                                                                                                                                                                                                                                                                                                                                                                                                                                                                                                                                                                                                                                                                                                                                                                                                                                                                                                                                                                                                                                                                                                                                                                                                                                                                                                                                                                                                                                                                                                                                                                                                                                                                                                                                                                                                                                                                                                                                                                                                                                                                                                                                                                                                                                                                                                                                                                                                                                                                                                                                                                                                                                                                                                                                                                                                                                                                                                                                                                          |
| YP_618105 | Sala_3068 | 3-hydroxyacyl-CoA dehydrogenase, NAD-binding | 59.38%            | 41                      |                                                                                                                                                                                                                                                                                                                                                                                                                                                                                                                                                                                                                                                                                                                                                                                                                                                                                                                                                                                                                                                                                                                                                                                                                                                                                                                                                                                                                                                                                                                                                                                                                                                                                                                                                                                                                                                                                                                                                                                                                                                                                                                                                                                                                                                                                                                                                                                                                                                                                                                                                                                                                                                                                                                                                                                                                                                                                                                                                                                                                                                                                                                                                                                                                                                                                                          |
| YP_618106 | Sala_3069 | beta-lactamase                               | 30.50%            | 9                       |                                                                                                                                                                                                                                                                                                                                                                                                                                                                                                                                                                                                                                                                                                                                                                                                                                                                                                                                                                                                                                                                                                                                                                                                                                                                                                                                                                                                                                                                                                                                                                                                                                                                                                                                                                                                                                                                                                                                                                                                                                                                                                                                                                                                                                                                                                                                                                                                                                                                                                                                                                                                                                                                                                                                                                                                                                                                                                                                                                                                                                                                                                                                                                                                                                                                                                          |
| YP_618107 | Sala_3070 | short-chain dehydrogenase/reductase SDR      | 9.36%             | 2                       |                                                                                                                                                                                                                                                                                                                                                                                                                                                                                                                                                                                                                                                                                                                                                                                                                                                                                                                                                                                                                                                                                                                                                                                                                                                                                                                                                                                                                                                                                                                                                                                                                                                                                                                                                                                                                                                                                                                                                                                                                                                                                                                                                                                                                                                                                                                                                                                                                                                                                                                                                                                                                                                                                                                                                                                                                                                                                                                                                                                                                                                                                                                                                                                                                                                                                                          |
| YP_618108 | Sala_3071 | short-chain dehydrogenase/reductase SDR      | 15.12%            | 2                       |                                                                                                                                                                                                                                                                                                                                                                                                                                                                                                                                                                                                                                                                                                                                                                                                                                                                                                                                                                                                                                                                                                                                                                                                                                                                                                                                                                                                                                                                                                                                                                                                                                                                                                                                                                                                                                                                                                                                                                                                                                                                                                                                                                                                                                                                                                                                                                                                                                                                                                                                                                                                                                                                                                                                                                                                                                                                                                                                                                                                                                                                                                                                                                                                                                                                                                          |
| YP_618109 | Sala_3072 | aminoglycoside phosphotransferase            | 13.40%            | 4                       |                                                                                                                                                                                                                                                                                                                                                                                                                                                                                                                                                                                                                                                                                                                                                                                                                                                                                                                                                                                                                                                                                                                                                                                                                                                                                                                                                                                                                                                                                                                                                                                                                                                                                                                                                                                                                                                                                                                                                                                                                                                                                                                                                                                                                                                                                                                                                                                                                                                                                                                                                                                                                                                                                                                                                                                                                                                                                                                                                                                                                                                                                                                                                                                                                                                                                                          |
| YP_618110 | Sala_3073 | Alcohol dehydrogenase, zinc-binding          | 20.94%            | 6                       |                                                                                                                                                                                                                                                                                                                                                                                                                                                                                                                                                                                                                                                                                                                                                                                                                                                                                                                                                                                                                                                                                                                                                                                                                                                                                                                                                                                                                                                                                                                                                                                                                                                                                                                                                                                                                                                                                                                                                                                                                                                                                                                                                                                                                                                                                                                                                                                                                                                                                                                                                                                                                                                                                                                                                                                                                                                                                                                                                                                                                                                                                                                                                                                                                                                                                                          |
| YP_618111 | Sala_3074 | acyl-CoA dehydrogenase-like protein          | 52.68%            | 14                      |                                                                                                                                                                                                                                                                                                                                                                                                                                                                                                                                                                                                                                                                                                                                                                                                                                                                                                                                                                                                                                                                                                                                                                                                                                                                                                                                                                                                                                                                                                                                                                                                                                                                                                                                                                                                                                                                                                                                                                                                                                                                                                                                                                                                                                                                                                                                                                                                                                                                                                                                                                                                                                                                                                                                                                                                                                                                                                                                                                                                                                                                                                                                                                                                                                                                                                          |
| YP_618114 | Sala_3077 | acyl-CoA dehydrogenase-like protein          | 11.20%            | 3                       |                                                                                                                                                                                                                                                                                                                                                                                                                                                                                                                                                                                                                                                                                                                                                                                                                                                                                                                                                                                                                                                                                                                                                                                                                                                                                                                                                                                                                                                                                                                                                                                                                                                                                                                                                                                                                                                                                                                                                                                                                                                                                                                                                                                                                                                                                                                                                                                                                                                                                                                                                                                                                                                                                                                                                                                                                                                                                                                                                                                                                                                                                                                                                                                                                                                                                                          |
| YP_618115 | Sala_3078 | acyl-CoA dehydrogenase-like protein          | 25.54%            | 7                       |                                                                                                                                                                                                                                                                                                                                                                                                                                                                                                                                                                                                                                                                                                                                                                                                                                                                                                                                                                                                                                                                                                                                                                                                                                                                                                                                                                                                                                                                                                                                                                                                                                                                                                                                                                                                                                                                                                                                                                                                                                                                                                                                                                                                                                                                                                                                                                                                                                                                                                                                                                                                                                                                                                                                                                                                                                                                                                                                                                                                                                                                                                                                                                                                                                                                                                          |

| Accession | Locus tag | Description                             | Sequence coverage | No. peptides identified | List of peptides identified                                                                                                                                                                                                                                                                                                                                                                                                                                                                                                                                                                                                                                                                                                                                                                                                                                                                                                                                                                                                                                                                                                                                                                                                                                                                                                                                                                                                                                                                                                                                                                                                                                                                                                                                                                                                                                                                                                                                                                                                                                                                                                                                                                                                                                                                                                                                                                                                                                                                                                                                                                                                                                                                                                                                                                                                                                                                                                                                                                                                                                                                                                                                                                                                                                                                                                                                                                          |
|-----------|-----------|-----------------------------------------|-------------------|-------------------------|------------------------------------------------------------------------------------------------------------------------------------------------------------------------------------------------------------------------------------------------------------------------------------------------------------------------------------------------------------------------------------------------------------------------------------------------------------------------------------------------------------------------------------------------------------------------------------------------------------------------------------------------------------------------------------------------------------------------------------------------------------------------------------------------------------------------------------------------------------------------------------------------------------------------------------------------------------------------------------------------------------------------------------------------------------------------------------------------------------------------------------------------------------------------------------------------------------------------------------------------------------------------------------------------------------------------------------------------------------------------------------------------------------------------------------------------------------------------------------------------------------------------------------------------------------------------------------------------------------------------------------------------------------------------------------------------------------------------------------------------------------------------------------------------------------------------------------------------------------------------------------------------------------------------------------------------------------------------------------------------------------------------------------------------------------------------------------------------------------------------------------------------------------------------------------------------------------------------------------------------------------------------------------------------------------------------------------------------------------------------------------------------------------------------------------------------------------------------------------------------------------------------------------------------------------------------------------------------------------------------------------------------------------------------------------------------------------------------------------------------------------------------------------------------------------------------------------------------------------------------------------------------------------------------------------------------------------------------------------------------------------------------------------------------------------------------------------------------------------------------------------------------------------------------------------------------------------------------------------------------------------------------------------------------------------------------------------------------------------------------------------------------------|
| YP_618116 | Sala_3079 | short-chain dehydrogenase/reductase SDR | 72.66%            | 16                      | R.DSADATGFSR.D<br>R.LIGEFQGLQHR.A<br>K.AGGTQAGR.W<br>K.SPFLLTQALHGLLK.A<br>K.TAQIEEAVADFETR.Y<br>R.KTAQIEEAVADFETR.Y<br>R.IGVPEDMAGAALYLASK.A<br>R.LNFWETYSYHASK.A<br>R.LVTDHLVTAIAPGAFQSDMNK.A<br>K.AAGDYVVDITVVDGSLVHSDLK.T<br>R.EERLDLVNAGAAGWEPFEPFEGWVK.V<br>.MNLDMFGLDGR.I<br>R.DHGDVAK.S<br>K.VINIGSIDGMR.L<br>R.LVTDHLVTAIAPGAFQSDMNK.A<br>R.LDLVNNAGAAGWEPFEPFEGWVK.V<br>K.AAILYLTK.R<br>K.MIVEGYLAAGAAR.V<br>K.AAGTHERPAK.V<br>K.VTTVDVNATEKGLDNTTVK.L<br>K.VAADWMAEFK.K<br>R.VLAELFNISGVEADYTLDEAAR.V<br>R.IITEQVEIAAK.Y<br>K.LFVAEIDNALTLYR.D<br>R.IAEGQILTINAIATLR.N<br>R.GIAGAEADPGLDALSDDTIAFVR.G<br>R.AHDGELLEITGQTR.L<br>R.AIPWVFSWAQAR.T<br>R.YAGLSAQDGHDAIFGR.I<br>K.LKADGIDSAVAALLNAALIAPVLAHTPTEVR.R<br>K.ADGIDSAVAALLNAALIAPVLAHTPTEVR.R<br>R.IGSWGDRDRGNPFVTAETLR.M<br>R.LLEKNPALEASIR.L<br>R.GLVYDTPAFR.D<br>R.DIVTIASGLSASGK.G<br>K.DAIQWIIISK.A<br>R.QGIAEPEATVAALEK.L<br>K.AESLSDLEVVHVLAR.E<br>R.FTAAMDALSDTAFAYR.G<br>R.DAGLDETPGDVVEDAIR.R<br>R.AMTPFAEITLKI<br>K.GQLAGIGALGR.L<br>R.QVLLWQTR.P<br>R.GGGSFAAIR.A<br>R.TMLPGWYTGEEAFAADK.A<br>R.LPYIEPLNLQIEMK.R<br>R.LGKDAIVQWIIISK.A<br>R.IRITTEQVEIAAK.Y<br>R.GFMLFMSLANLAEDR.Q<br>R.DGNPFVTAETLR.M<br>R.AVEVFGHFLATLDMR.Q<br>K.NPALEASIR.L<br>R.ISSWIGGDR.D<br>R.GHQEVMIGVSDSNK.D<br>R.LRPLPIELNLQIEMK.R<br>R.EGGLWSAESR.D<br>R.DVFLPVVPK.L<br>K.YGTIDSAATNLEAMVSASLASLEPEAMGAK.E<br>R.TKSTAIEDLR.A<br>R.DAGLDETPGDVVEDAIR.Q<br>K.ELGVNRPLAAPHWEHSEETAGELAIHAAADV.R.K<br>K.DGGYLTSTWGLHQASAALTPVFEQADTAMQLFHR.G<br>R.TMLPGWYTGEEAFAADK.A<br>R.QNSAVHER.V<br>R.LSATYAATGKPPRPGALK.G<br>R.LSATYAATGKPPR.P<br>R.AYGGDKLFR.Q<br>R.AQPAGTVQGR.I<br>K.YGTIDSAATNLEAMVSASLASLEPEAMGAK.E<br>K.STAIEDLR.A<br>K.SDMIAAR.Y<br>K.GEPIAASDFR.R<br>R.MRDAGLDETPGDVVEDAIR.R<br>R.ILGDVIR.A<br>R.GFMLFMSLANLAEDR.Q<br>R.GFMLFMSLANLAEDR.Q<br>R.FTAAMDALSDTAFAYR.G<br>R.AVEVFGHFLATLDMRQNSAVHER.V<br>R.ALSGIYAR.L<br>K.YGTIDSAATNLEAMVSASLASLEPEAMGAK.E<br>K.GEPIAASDFR.D<br>K.ADGIDSAVAALLNAALIAPVLAHTPTEVR.R<br>R.VEILADVSLDAPSTTVAR.Q<br>R.QVPAFSLVDAQR.Q<br>R.IQNELFDLGDADLTPDAER.G<br>R.ALNPLALTYLNR.L<br>K.SFILPGSSEAAAR.L<br>R.TGDDGTTGLVGGSR.I<br>R.LEEEDAMMAALDALK.S<br>R.SAVAAADR.A<br>R.LSDHLFVLAR.S<br>R.SINGAAGDVLWPKGATR.<br>K.HLFAQNPLGPAVWRP.D<br>R.TDASTCSDPIEALTGR.F<br>R.PVTNGEWQQFDDGGYR.T<br>R.DHVPQALFDRPPLFNYSYEAEGPR.H<br>R.AAPGSAVEYNGK.F<br>K.TPLLLAIDPAAYVPVDSIGDLR.D<br>R.QISEDDTGVDVAFR.A<br>R.AVVELGSGSSTK.T<br>K.GETHSENSHK.Y<br>R.AYDDPAGVTAAPNLNLIER.I<br>R.LPVYFEADFTQK.V<br>R.IKDIAVLER.A<br>R.ADVHAGLSQTPK.A<br>R.HAADIATIGPGR.A<br>R.DSAEALAAAR.F<br>R.AALGDGSLMLIGIDR.I<br>R.AGGWTFIATWDADAFALLIAEATEFR.S<br>K.LGFFFGSTIGNMVAR.T<br>R.WFYDTTGSALFEDITALPEYPTRSETDLLTR.H<br>R.WFYDTTGSALFEDITALPEYPTR.S<br>R.AALGDGSLMLIGIDR.I<br>K.TPLLLAIDPAAYVPVDSIGDLRDSAEALAAAR.F<br>K.LGFFFGSTIGNMVAR.T<br>K.FRPAQLVQVEAGVWVK.K<br>R.GLATSDTLATVEAYGR.G<br>R.GFYDWTGDKPVPTR.<br>K.QIVHANDAPGFVNR.V<br>R.VLQSGTGDKP.F<br>R.LAQAPDPAR.F<br>R.ITPVADHAAFPASDLVIEATER.E<br>K.MAQSDADMILLAR.I<br>R.VLMPLINEAIFALGEGVATMQDIDAGCR.L<br>R.AIFASVGEHLSATILASNTSSIPTR.L<br>R.VLMPLINEAIFALGEGVATMQDIDAGCR.L<br>R.PAPLLVQVEAGVWVK.K<br>R.ITPVADHAAFPASDLVIEATEREIEKR.A<br>R.MIVGIGAGQMAGIAQVSAGAGHVLADLIDLAR.A<br>K.LLEIQEAPYSLAGLGR.C<br>R.VAGTIAGSVIPFR.G<br>R.EVQELDAVLGPDVNEQVQDK.S<br>R.GLIGETIGANAER.R<br>R.YALAVAGTVR.R<br>R.GPAVFIGEAKPNLGLAWPNSVR.V<br>R.GNFAEHTQPSAGNSR.V<br>R.GLTIQIRVPGDGGWNPHPANDQSVR.G |
| YP_618117 | Sala_3080 | hypothetical protein                    | 18.60%            | 2                       | R.LKDAIVQWIIISK.A<br>R.IRITTEQVEIAAK.Y                                                                                                                                                                                                                                                                                                                                                                                                                                                                                                                                                                                                                                                                                                                                                                                                                                                                                                                                                                                                                                                                                                                                                                                                                                                                                                                                                                                                                                                                                                                                                                                                                                                                                                                                                                                                                                                                                                                                                                                                                                                                                                                                                                                                                                                                                                                                                                                                                                                                                                                                                                                                                                                                                                                                                                                                                                                                                                                                                                                                                                                                                                                                                                                                                                                                                                                                                               |
| YP_618118 | Sala_3081 | Phosphoenolpyruvate carboxylase         | 77.62%            | 61                      | R.GFMLFMSLANLAEDR.Q<br>R.DGNPFVTAETLR.M<br>R.AVEVFGHFLATLDMR.Q<br>K.NPALEASIR.L<br>R.ISSWIGGDR.D<br>R.GHQEVMIGVSDSNK.D<br>R.LRPLPIELNLQIEMK.R<br>R.EGGLWSAESR.D<br>R.DVFLPVVPK.L<br>K.YGTIDSAATNLEAMVSASLASLEPEAMGAK.E<br>R.TKSTAIEDLR.A<br>R.DAGLDETPGDVVEDAIR.Q<br>K.ELGVNRPLAAPHWEHSEETAGELAIHAAADV.R.K<br>K.DGGYLTSTWGLHQASAALTPVFEQADTAMQLFHR.G<br>R.TMLPGWYTGEEAFAADK.A<br>R.QNSAVHER.V<br>R.LSATYAATGKPPRPGALK.G<br>R.LSATYAATGKPPR.P<br>R.AYGGDKLFR.Q<br>R.AQPAGTVQGR.I<br>K.YGTIDSAATNLEAMVSASLASLEPEAMGAK.E<br>K.STAIEDLR.A<br>K.SDMIAAR.Y<br>K.GEPIAASDFR.R<br>R.MRDAGLDETPGDVVEDAIR.R<br>R.ILGDVIR.A<br>R.GFMLFMSLANLAEDR.Q<br>R.GFMLFMSLANLAEDR.Q<br>R.FTAAMDALSDTAFAYR.G<br>R.AVEVFGHFLATLDMRQNSAVHER.V<br>R.ALSGIYAR.L<br>K.YGTIDSAATNLEAMVSASLASLEPEAMGAK.E<br>K.GEPIAASDFR.D<br>K.ADGIDSAVAALLNAALIAPVLAHTPTEVR.R<br>R.VEILADVSLDAPSTTVAR.Q<br>R.QVPAFSLVDAQR.Q<br>R.IQNELFDLGDADLTPDAER.G<br>R.ALNPLALTYLNR.L<br>K.SFILPGSSEAAAR.L<br>R.TGDDGTTGLVGGSR.I<br>R.LEEEDAMMAALDALK.S<br>R.SAVAAADR.A<br>R.LSDHLFVLAR.S<br>R.SINGAAGDVLWPKGATR.<br>K.HLFAQNPLGPAVWRP.D<br>R.TDASTCSDPIEALTGR.F<br>R.PVTNGEWQQFDDGGYR.T<br>R.DHVPQALFDRPPLFNYSYEAEGPR.H<br>R.AAPGSAVEYNGK.F<br>K.TPLLLAIDPAAYVPVDSIGDLR.D<br>R.QISEDDTGVDVAFR.A<br>R.AVVELGSGSSTK.T<br>K.GETHSENSHK.Y<br>R.AYDDPAGVTAAPNLNLIER.I<br>R.LPVYFEADFTQK.V<br>R.IKDIAVLER.A<br>R.ADVHAGLSQTPK.A<br>R.HAADIATIGPGR.A<br>R.DSAEALAAAR.F<br>R.AALGDGSLMLIGIDR.I<br>R.AGGWTFIATWDADAFALLIAEATEFR.S<br>K.LGFFFGSTIGNMVAR.T<br>R.WFYDTTGSALFEDITALPEYPTRSETDLLTR.H<br>R.WFYDTTGSALFEDITALPEYPTR.S<br>R.AALGDGSLMLIGIDR.I<br>K.TPLLLAIDPAAYVPVDSIGDLRDSAEALAAAR.F<br>K.LGFFFGSTIGNMVAR.T<br>K.FRPAQLVQVEAGVWVK.K<br>R.GLATSDTLATVEAYGR.G<br>R.GFYDWTGDKPVPTR.<br>K.QIVHANDAPGFVNR.V<br>R.VLQSGTGDKP.F<br>R.LAQAPDPAR.F<br>R.ITPVADHAAFPASDLVIEATER.E<br>K.MAQSDADMILLAR.I<br>R.VLMPLINEAIFALGEGVATMQDIDAGCR.L<br>R.AIFASVGEHLSATILASNTSSIPTR.L<br>R.VLMPLINEAIFALGEGVATMQDIDAGCR.L<br>R.PAPLLVQVEAGVWVK.K<br>R.ITPVADHAAFPASDLVIEATEREIEKR.A<br>R.MIVGIGAGQMAGIAQVSAGAGHVLADLIDLAR.A<br>K.LLEIQEAPYSLAGLGR.C<br>R.VAGTIAGSVIPFR.G<br>R.EVQELDAVLGPDVNEQVQDK.S<br>R.GLIGETIGANAER.R<br>R.YALAVAGTVR.R<br>R.GPAVFIGEAKPNLGLAWPNSVR.V<br>R.GNFAEHTQPSAGNSR.V<br>R.GLTIQIRVPGDGGWNPHPANDQSVR.G                                                                                                                                                                                                                                                                                                                                                                                                                                                                                                                                                                                                                                                                                                                                                                                                                                                                                                                                                                                                                                                                                                                                             |
| YP_618119 | Sala_3082 | lipoprotein-related protein             | 23.40%            | 2                       | R.VEILADVSLDAPSTTVAR.Q<br>R.QVPAFSLVDAQR.Q                                                                                                                                                                                                                                                                                                                                                                                                                                                                                                                                                                                                                                                                                                                                                                                                                                                                                                                                                                                                                                                                                                                                                                                                                                                                                                                                                                                                                                                                                                                                                                                                                                                                                                                                                                                                                                                                                                                                                                                                                                                                                                                                                                                                                                                                                                                                                                                                                                                                                                                                                                                                                                                                                                                                                                                                                                                                                                                                                                                                                                                                                                                                                                                                                                                                                                                                                           |
| YP_618123 | Sala_3086 | cobalamin adenosyltransferase           | 58.03%            | 8                       | R.IQNELFDLGDADLTPDAER.G<br>R.ALNPLALTYLNR.L<br>K.SFILPGSSEAAAR.L<br>R.TGDDGTTGLVGGSR.I<br>R.LEEEDAMMAALDALK.S<br>R.SAVAAADR.A<br>R.LSDHLFVLAR.S<br>R.SINGAAGDVLWPKGATR.<br>K.HLFAQNPLGPAVWRP.D<br>R.TDASTCSDPIEALTGR.F<br>R.PVTNGEWQQFDDGGYR.T<br>R.DHVPQALFDRPPLFNYSYEAEGPR.H<br>R.AAPGSAVEYNGK.F<br>K.TPLLLAIDPAAYVPVDSIGDLR.D<br>R.QISEDDTGVDVAFR.A<br>R.AVVELGSGSSTK.T<br>K.GETHSENSHK.Y<br>R.AYDDPAGVTAAPNLNLIER.I<br>R.LPVYFEADFTQK.V<br>R.IKDIAVLER.A<br>R.ADVHAGLSQTPK.A<br>R.HAADIATIGPGR.A<br>R.DSAEALAAAR.F<br>R.AALGDGSLMLIGIDR.I<br>R.AGGWTFIATWDADAFALLIAEATEFR.S<br>K.LGFFFGSTIGNMVAR.T<br>R.WFYDTTGSALFEDITALPEYPTRSETDLLTR.H<br>R.WFYDTTGSALFEDITALPEYPTR.S<br>R.AALGDGSLMLIGIDR.I<br>K.TPLLLAIDPAAYVPVDSIGDLRDSAEALAAAR.F<br>K.LGFFFGSTIGNMVAR.T<br>K.FRPAQLVQVEAGVWVK.K<br>R.GLATSDTLATVEAYGR.G<br>R.GFYDWTGDKPVPTR.<br>K.QIVHANDAPGFVNR.V<br>R.VLQSGTGDKP.F<br>R.LAQAPDPAR.F<br>R.ITPVADHAAFPASDLVIEATER.E<br>K.MAQSDADMILLAR.I<br>R.VLMPLINEAIFALGEGVATMQDIDAGCR.L<br>R.AIFASVGEHLSATILASNTSSIPTR.L<br>R.VLMPLINEAIFALGEGVATMQDIDAGCR.L<br>R.PAPLLVQVEAGVWVK.K<br>R.ITPVADHAAFPASDLVIEATEREIEKR.A<br>R.MIVGIGAGQMAGIAQVSAGAGHVLADLIDLAR.A<br>K.LLEIQEAPYSLAGLGR.C<br>R.VAGTIAGSVIPFR.G<br>R.EVQELDAVLGPDVNEQVQDK.S<br>R.GLIGETIGANAER.R<br>R.YALAVAGTVR.R<br>R.GPAVFIGEAKPNLGLAWPNSVR.V<br>R.GNFAEHTQPSAGNSR.V<br>R.GLTIQIRVPGDGGWNPHPANDQSVR.G                                                                                                                                                                                                                                                                                                                                                                                                                                                                                                                                                                                                                                                                                                                                                                                                                                                                                                                                                                                                                                                                                                                                                                                                                                                                                                                                                                                                                                                                                                                                                                                                                                                                                                                                                                                                                                                                                                                                                                                                                                 |
| YP_618124 | Sala_3087 | protein of unknown function DUF323      | 20.57%            | 5                       | R.SINGAAGDVLWPKGATR.<br>K.HLFAQNPLGPAVWRP.D<br>R.TDASTCSDPIEALTGR.F<br>R.PVTNGEWQQFDDGGYR.T<br>R.DHVPQALFDRPPLFNYSYEAEGPR.H<br>R.AAPGSAVEYNGK.F<br>K.TPLLLAIDPAAYVPVDSIGDLR.D<br>R.QISEDDTGVDVAFR.A<br>R.AVVELGSGSSTK.T<br>K.GETHSENSHK.Y<br>R.AYDDPAGVTAAPNLNLIER.I<br>R.LPVYFEADFTQK.V<br>R.IKDIAVLER.A<br>R.ADVHAGLSQTPK.A<br>R.HAADIATIGPGR.A<br>R.DSAEALAAAR.F<br>R.AALGDGSLMLIGIDR.I<br>R.AGGWTFIATWDADAFALLIAEATEFR.S<br>K.LGFFFGSTIGNMVAR.T<br>R.WFYDTTGSALFEDITALPEYPTRSETDLLTR.H<br>R.WFYDTTGSALFEDITALPEYPTR.S<br>R.AALGDGSLMLIGIDR.I<br>K.TPLLLAIDPAAYVPVDSIGDLRDSAEALAAAR.F<br>K.LGFFFGSTIGNMVAR.T<br>K.FRPAQLVQVEAGVWVK.K<br>R.GLATSDTLATVEAYGR.G<br>R.GFYDWTGDKPVPTR.<br>K.QIVHANDAPGFVNR.V<br>R.VLQSGTGDKP.F<br>R.LAQAPDPAR.F<br>R.ITPVADHAAFPASDLVIEATER.E<br>K.MAQSDADMILLAR.I<br>R.VLMPLINEAIFALGEGVATMQDIDAGCR.L<br>R.AIFASVGEHLSATILASNTSSIPTR.L<br>R.VLMPLINEAIFALGEGVATMQDIDAGCR.L<br>R.PAPLLVQVEAGVWVK.K<br>R.ITPVADHAAFPASDLVIEATEREIEKR.A<br>R.MIVGIGAGQMAGIAQVSAGAGHVLADLIDLAR.A<br>K.LLEIQEAPYSLAGLGR.C<br>R.VAGTIAGSVIPFR.G<br>R.EVQELDAVLGPDVNEQVQDK.S<br>R.GLIGETIGANAER.R<br>R.YALAVAGTVR.R<br>R.GPAVFIGEAKPNLGLAWPNSVR.V<br>R.GNFAEHTQPSAGNSR.V<br>R.GLTIQIRVPGDGGWNPHPANDQSVR.G                                                                                                                                                                                                                                                                                                                                                                                                                                                                                                                                                                                                                                                                                                                                                                                                                                                                                                                                                                                                                                                                                                                                                                                                                                                                                                                                                                                                                                                                                                                                                                                                                                                                                                                                                                                                                                                                                                                                                                                                                                                                                                                                                                                    |
| YP_618125 | Sala_3088 | hypothetical protein                    | 68.90%            | 18                      | R.QISEDDTGVDVAFR.A<br>R.AVVELGSGSSTK.T<br>K.GETHSENSHK.Y<br>R.AYDDPAGVTAAPNLNLIER.I<br>R.LPVYFEADFTQK.V<br>R.IKDIAVLER.A<br>R.ADVHAGLSQTPK.A<br>R.HAADIATIGPGR.A<br>R.DSAEALAAAR.F<br>R.AALGDGSLMLIGIDR.I<br>R.AGGWTFIATWDADAFALLIAEATEFR.S<br>K.LGFFFGSTIGNMVAR.T<br>R.WFYDTTGSALFEDITALPEYPTRSETDLLTR.H<br>R.WFYDTTGSALFEDITALPEYPTR.S<br>R.AALGDGSLMLIGIDR.I<br>K.TPLLLAIDPAAYVPVDSIGDLRDSAEALAAAR.F<br>K.LGFFFGSTIGNMVAR.T<br>K.FRPAQLVQVEAGVWVK.K<br>R.GLATSDTLATVEAYGR.G<br>R.GFYDWTGDKPVPTR.<br>K.QIVHANDAPGFVNR.V<br>R.VLQSGTGDKP.F<br>R.LAQAPDPAR.F<br>R.ITPVADHAAFPASDLVIEATER.E<br>K.MAQSDADMILLAR.I<br>R.VLMPLINEAIFALGEGVATMQDIDAGCR.L<br>R.AIFASVGEHLSATILASNTSSIPTR.L<br>R.VLMPLINEAIFALGEGVATMQDIDAGCR.L<br>R.PAPLLVQVEAGVWVK.K<br>R.ITPVADHAAFPASDLVIEATEREIEKR.A<br>R.MIVGIGAGQMAGIAQVSAGAGHVLADLIDLAR.A<br>K.LLEIQEAPYSLAGLGR.C<br>R.VAGTIAGSVIPFR.G<br>R.EVQELDAVLGPDVNEQVQDK.S<br>R.GLIGETIGANAER.R<br>R.YALAVAGTVR.R<br>R.GPAVFIGEAKPNLGLAWPNSVR.V<br>R.GNFAEHTQPSAGNSR.V<br>R.GLTIQIRVPGDGGWNPHPANDQSVR.G                                                                                                                                                                                                                                                                                                                                                                                                                                                                                                                                                                                                                                                                                                                                                                                                                                                                                                                                                                                                                                                                                                                                                                                                                                                                                                                                                                                                                                                                                                                                                                                                                                                                                                                                                                                                                                                                                                                                                                                                                                                                                                                                                                                                                                                                                                                                                                     |
| YP_618126 | Sala_3089 | 3-hydroxybutyryl-CoA dehydrogenase      | 74.31%            | 14                      | R.QISEDDTGVDVAFR.A<br>R.AVVELGSGSSTK.T<br>K.GETHSENSHK.Y<br>R.AYDDPAGVTAAPNLNLIER.I<br>R.LPVYFEADFTQK.V<br>R.IKDIAVLER.A<br>R.ADVHAGLSQTPK.A<br>R.HAADIATIGPGR.A<br>R.DSAEALAAAR.F<br>R.AALGDGSLMLIGIDR.I<br>R.AGGWTFIATWDADAFALLIAEATEFR.S<br>K.LGFFFGSTIGNMVAR.T<br>R.WFYDTTGSALFEDITALPEYPTRSETDLLTR.H<br>R.WFYDTTGSALFEDITALPEYPTR.S<br>R.AALGDGSLMLIGIDR.I<br>K.TPLLLAIDPAAYVPVDSIGDLRDSAEALAAAR.F<br>K.LGFFFGSTIGNMVAR.T<br>K.FRPAQLVQVEAGVWVK.K<br>R.GLATSDTLATVEAYGR.G<br>R.GFYDWTGDKPVPTR.<br>K.QIVHANDAPGFVNR.V<br>R.VLQSGTGDKP.F<br>R.LAQAPDPAR.F<br>R.ITPVADHAAFPASDLVIEATER.E<br>K.MAQSDADMILLAR.I<br>R.VLMPLINEAIFALGEGVATMQDIDAGCR.L<br>R.AIFASVGEHLSATILASNTSSIPTR.L<br>R.VLMPLINEAIFALGEGVATMQDIDAGCR.L<br>R.PAPLLVQVEAGVWVK.K<br>R.ITPVADHAAFPASDLVIEATEREIEKR.A<br>R.MIVGIGAGQMAGIAQVSAGAGHVLADLIDLAR.A<br>K.LLEIQEAPYSLAGLGR.C<br>R.VAGTIAGSVIPFR.G<br>R.EVQELDAVLGPDVNEQVQDK.S<br>R.GLIGETIGANAER.R<br>R.YALAVAGTVR.R<br>R.GPAVFIGEAKPNLGLAWPNSVR.V<br>R.GNFAEHTQPSAGNSR.V<br>R.GLTIQIRVPGDGGWNPHPANDQSVR.G                                                                                                                                                                                                                                                                                                                                                                                                                                                                                                                                                                                                                                                                                                                                                                                                                                                                                                                                                                                                                                                                                                                                                                                                                                                                                                                                                                                                                                                                                                                                                                                                                                                                                                                                                                                                                                                                                                                                                                                                                                                                                                                                                                                                                                                                                                                                                                     |
| YP_618127 | Sala_3090 | hypothetical protein                    | 43.90%            | 5                       | R.LLEIQEAPYSLAGLGR.C<br>R.VAGTIAGSVIPFR.G<br>R.EVQELDAVLGPDVNEQVQDK.S<br>R.GLIGETIGANAER.R<br>R.YALAVAGTVR.R<br>R.GPAVFIGEAKPNLGLAWPNSVR.V<br>R.GNFAEHTQPSAGNSR.V<br>R.GLTIQIRVPGDGGWNPHPANDQSVR.G                                                                                                                                                                                                                                                                                                                                                                                                                                                                                                                                                                                                                                                                                                                                                                                                                                                                                                                                                                                                                                                                                                                                                                                                                                                                                                                                                                                                                                                                                                                                                                                                                                                                                                                                                                                                                                                                                                                                                                                                                                                                                                                                                                                                                                                                                                                                                                                                                                                                                                                                                                                                                                                                                                                                                                                                                                                                                                                                                                                                                                                                                                                                                                                                   |
| YP_618129 | Sala_3092 | hypothetical protein                    | 33.00%            | 3                       | R.GPAVFIGEAKPNLGLAWPNSVR.V<br>R.GNFAEHTQPSAGNSR.V<br>R.GLTIQIRVPGDGGWNPHPANDQSVR.G                                                                                                                                                                                                                                                                                                                                                                                                                                                                                                                                                                                                                                                                                                                                                                                                                                                                                                                                                                                                                                                                                                                                                                                                                                                                                                                                                                                                                                                                                                                                                                                                                                                                                                                                                                                                                                                                                                                                                                                                                                                                                                                                                                                                                                                                                                                                                                                                                                                                                                                                                                                                                                                                                                                                                                                                                                                                                                                                                                                                                                                                                                                                                                                                                                                                                                                   |

| Accession | Locus tag | Description                                     | Sequence coverage | No. peptides identified | List of peptides identified                                                                                                                                                                                                                                                                                                                                                                                                                                                                                                                                                                                                                                                                                                                                                                                                                                                                                                                                                                                                                                                                                                                                                                                                                                                                                                                                                                                                                                                                                                                                                                                                                                                                                                                                                                                                                                                                                                                                                                                                                                                                                                                                                                                                                                                                                                                                                                                                                                                                                                                                                                                                                                                                                                                                                                                                                                                                                                                                                                                                                                                                                                                                                                                                                                                                                                                                                                                                          |
|-----------|-----------|-------------------------------------------------|-------------------|-------------------------|--------------------------------------------------------------------------------------------------------------------------------------------------------------------------------------------------------------------------------------------------------------------------------------------------------------------------------------------------------------------------------------------------------------------------------------------------------------------------------------------------------------------------------------------------------------------------------------------------------------------------------------------------------------------------------------------------------------------------------------------------------------------------------------------------------------------------------------------------------------------------------------------------------------------------------------------------------------------------------------------------------------------------------------------------------------------------------------------------------------------------------------------------------------------------------------------------------------------------------------------------------------------------------------------------------------------------------------------------------------------------------------------------------------------------------------------------------------------------------------------------------------------------------------------------------------------------------------------------------------------------------------------------------------------------------------------------------------------------------------------------------------------------------------------------------------------------------------------------------------------------------------------------------------------------------------------------------------------------------------------------------------------------------------------------------------------------------------------------------------------------------------------------------------------------------------------------------------------------------------------------------------------------------------------------------------------------------------------------------------------------------------------------------------------------------------------------------------------------------------------------------------------------------------------------------------------------------------------------------------------------------------------------------------------------------------------------------------------------------------------------------------------------------------------------------------------------------------------------------------------------------------------------------------------------------------------------------------------------------------------------------------------------------------------------------------------------------------------------------------------------------------------------------------------------------------------------------------------------------------------------------------------------------------------------------------------------------------------------------------------------------------------------------------------------------------|
| YP_618131 | Sala_3094 | protein of unknown function DUF165              | 10.08%            | 2                       | R.ESAGTGTWLAIR.G<br>R.LAADFMIILGQSPR.L                                                                                                                                                                                                                                                                                                                                                                                                                                                                                                                                                                                                                                                                                                                                                                                                                                                                                                                                                                                                                                                                                                                                                                                                                                                                                                                                                                                                                                                                                                                                                                                                                                                                                                                                                                                                                                                                                                                                                                                                                                                                                                                                                                                                                                                                                                                                                                                                                                                                                                                                                                                                                                                                                                                                                                                                                                                                                                                                                                                                                                                                                                                                                                                                                                                                                                                                                                                               |
| YP_618132 | Sala_3095 | acetylglutamate kinase                          | 55.96%            | 16                      | K.SGALLDLDR.A<br>R.FFLTDVAGVLDK.S<br>R.IPHAMLEIFTRR.G<br>R.VTDAATAEVAEMVLAKG.I<br>R.SEADPSSGIER.H<br>K.INKEIVGWIAGLGGR.A<br>K.EIVGWJAGLGGR.A<br>K.AETLVEALPYLQR.Y<br>K.RSEADPSSGIER.H<br>K.DANLVLAEK.V<br>R.YAGQTFVIK.Y<br>K.RFFLTDVAGVLDK.S<br>K.QLGIESTFVGGRL.V<br>K.YGGHAMGDPEAQRDFAEDVWLK.A<br>K.YGGHAMGDPEAQR.D<br>K.AVGINPVVHGGPQIGAMLK.Q<br>R.APGLAVLVLDGDPASAVVYVSK.G<br>R.RADIVVAVGR.A<br>R.LAATATQDEVEALLR.Q<br>R.LGDLSGKDAIVGR.S<br>R.IADVAPEFR.A<br>R.LVGDVYAAALGVADAITVPGVGPMTIACLLR.N<br>R.ADIVVAVGR.A<br>K.GDWIKPGAIVDVGINR.L<br>K.ATVAAGMASFEHR.L<br>R.NRPLAANPSAFVAEJAFAR.L<br>R.WVLDHGDALATRPAPDFIASK.Q<br>R.WVLDHGDALATRP.P<br>K.AQADPAEAK.W<br>K.WQPHAVYVSCDGNAAATGAWQK.G<br>K.AAIGGVGALGGYLLGDLIGGR.S<br>R.RAASVADYLAGR.G<br>R.AASVADYLAGR.G<br>R.SALDNVAATLAEYPSYIDVYGHDTSTGSETYNQGLSER.R<br>K.IVGAGIGAVAGAGVGYMDQQEK.K<br>R.TAGTGIDVER.Q<br>R.IAPVTQADVNAAG.<br>R.QGQQLVLMNPGDVTFDLNSAMVK.S<br>R.MATLGYESQJK.C<br>R.ERTAGTIDVER.Q<br>K.IVGAGIGAVAGAGVGYMDQQEK.L<br>R.SALDNVAATLAEYPSYIDVYGHDTSTGSETYNQGLSER.R<br>R.QGQQLVLMNPGDVTFDLNSAMVK.S<br>R.QGQQLVLMNPGDVTFDLNSAMVK.S<br>R.MATLGYESQJK.C<br>K.IVGAGIGAVAGAGVGYMDQQEK.L<br>K.IVGAGIGAVAGAGVGYMDQQEK.K<br>R.QGQQLVLMNPGDVTFDLNSAMVK.S<br>K.CAPERTEADYQCNR.R<br>K.IGAPLVLLDR.S<br>R.LGELPQDRDYATAAGHALAVLK.H<br>R.KVDWIDISLDR.G<br>R.VTAEELHLVIAEASK.S<br>R.QLASDPGR.F<br>R.GSVDEIVGVQAR.D<br>R.DDGSLLIAGAMPADQMAERLGLIPLGDR.D<br>K.VHDDLDAMDALEALR.A<br>K.SSVIEESER.A<br>R.FQQIADWTDADVAR.I<br>R.DNLDIQASYLR.G<br>R.IDAQLGAFQGR.I<br>K.LGALLNGLGTR.F<br>R.FRPVPPVAEPAVEAAIPEPTVPPPPAPAPATAK.A<br>K.ADNLLK.K<br>R.FRGLLAALLHAATGR.L<br>R.AHAIDFVVGPPEAPLVAGLADR.L<br>R.IADAIEVGGVR.V<br>R.VLNVATGK.S<br>R.RIADAEVGGVR.V<br>R.IIRPTVGTLEAEATPYVGVFLAGLMLTAEQPK.L<br>R.VGQDGTGPMTGGMGAYSPAVLTPDLEAVAMER.I<br>R.DGALLHAATGR.L<br>R.AEPPTFHHDYALTVVMAAK.G<br>R.TLVAAGGR.V<br>R.CTSADEALALDGFDPVVK.A<br>R.ASIFTAAYR.C<br>R.AIGVPVFGSAAAAR.L<br>R.TIGVTSPTGAIVR.D<br>R.DAGGAIVTSAK.A<br>R.QRLDDVGER.L<br>R.PDLVIVAR.G<br>R.LAFRPEDSIEVIATGK.L<br>K.VARPDVIVAR.G<br>R.VRHDLVLTGAEEQAVITGR.A<br>R.IVRPITVAAGR.W<br>R.GGATSDADFAR.R<br>R.YSDYSIEGAGGYDTWTWK.A<br>R.VDLMNPLALIER.V<br>R.VDALTGAAVTYGADAITGVVNFVTKR.D<br>R.RNPITGGLDGPSTTPGLFLTNQGR.L<br>R.KYTAQASDLLAK.T<br>R.FSGTRPLDPVTGQSTDPDTPVANGGLR.Q<br>K.AGGSWEPGAGVK.F<br>R.VDALTGAAVTYGADAITGVVNFVTKR.R<br>R.NPNLEQSTPNVITADTIELK.Q<br>R.ISDYQTFDYR.V<br>R.AIVSGDLGFASPGAVQPIGFALGGEYR.K<br>K.YTAQASDLLAK.T<br>K.FNANVANPDSLNR.E<br>K.AQHYFDLTAR.F<br>R.NPITGGLDGPSTTPGLFLTNQGR.L<br>R.FNMSIDYNIK.I<br>R.ELPGVANIGSAVNNNGSASYDLR.G<br>R.AIVSGDLGFASPGAVQPIGFALGGEYR.Y<br>R.PFSNDTLDYSNQFIGSGTSVPSR.F<br>R.NIVLLNGNR.V<br>R.FNIVYQANVSDSVEVYTR.G<br>R.DFAGLEVTSANQITEEDGCHIFR.V<br>K.VDLSLLWR.W<br>K.ADTWTIGLVWQPDFLPR.F<br>K.QSNVAEVL.R.E<br>R.VDATIGANFDGGR.G<br>R.FTLGFDKVDLSLLWR.W<br>R.VAPSDVNGRVDLNNIPLALIER.V<br>R.RTPEVGR.I<br>K.NTVSTIIAPSGSFGGTVVNLNPNPLPSTLR.N<br>R.GNAVLSIGYQADPVYQGAR.P<br>R.GGTDITDWSVEGAYGESENIQTQNYTLQSR.F<br>R.QVNAAGAVPTFATNPNFNFQTPFER.F<br>R.ECVGYVSNCSFTSGIQEFQFSNR.F<br>K.FNANVANPDSLNR.ECVGYVSNCSFTSGIQEFQFSNR.F<br>K.INDVLTGTLPGDIIAACFDNVAASASDPACTSIR.R<br>R.VDATIGANFDDGRGNAVLSIGYQADPVYQGAR.P<br>R.TDPNREVTVTLNR.R<br>K.RDFAGLEVTSANQITEEDGCHIFR.V<br>K.INDVLTGTLPGDIIAACFDNVAASASDPACTSIR.R<br>R.VAPSDVNGR.V<br>R.TSLAQVR.A<br>R.TPEVGR.I<br>K.FRGNYSR.A<br>R.NQFCANVAAAGSGLYTPR.F<br>R.FTAECAAAATATGR.T<br>R.FNMSIDYNIK.I<br>R.EVTTLNR.R<br>R.SVKAQHYFDLTAR.F |
| YP_618134 | Sala_3097 | Methylenetetrahydrofolate dehydrogenase (NADP+) | 44.70%            | 9                       | R.ADIVVAVGR.A<br>K.GDWIKPGAIVDVGINR.L<br>K.ATVAAGMASFEHR.L<br>R.NRPLAANPSAFVAEJAFAR.L<br>R.WVLDHGDALATRPAPDFIASK.Q<br>R.WVLDHGDALATRP.P<br>K.AQADPAEAK.W<br>K.WQPHAVYVSCDGNAAATGAWQK.G<br>K.AAIGGVGALGGYLLGDLIGGR.S<br>R.RAASVADYLAGR.G<br>R.AASVADYLAGR.G<br>R.SALDNVAATLAEYPSYIDVYGHDTSTGSETYNQGLSER.R<br>K.IVGAGIGAVAGAGVGYMDQQEK.K<br>R.TAGTGIDVER.Q<br>R.IAPVTQADVNAAG.<br>R.QGQQLVLMNPGDVTFDLNSAMVK.S<br>R.MATLGYESQJK.C<br>R.ERTAGTIDVER.Q<br>K.IVGAGIGAVAGAGVGYMDQQEK.L<br>R.SALDNVAATLAEYPSYIDVYGHDTSTGSETYNQGLSER.R<br>R.QGQQLVLMNPGDVTFDLNSAMVK.S<br>R.QGQQLVLMNPGDVTFDLNSAMVK.S<br>R.MATLGYESQJK.C<br>K.IVGAGIGAVAGAGVGYMDQQEK.L<br>K.IVGAGIGAVAGAGVGYMDQQEK.K<br>R.QGQQLVLMNPGDVTFDLNSAMVK.S<br>K.CAPERTEADYQCNR.R                                                                                                                                                                                                                                                                                                                                                                                                                                                                                                                                                                                                                                                                                                                                                                                                                                                                                                                                                                                                                                                                                                                                                                                                                                                                                                                                                                                                                                                                                                                                                                                                                                                                                                                                                                                                                                                                                                                                                                                                                                                                                                                                                                                                                                                                                                                                                                                                                                                                                                                                                                                                                                                                                                      |
| YP_618135 | Sala_3098 | hypothetical protein                            | 33.48%            | 5                       | R.IADVAPEFR.A<br>R.LVGDVYAAALGVADAITVPGVGPMTIACLLR.N<br>R.ADIVVAVGR.A<br>K.GDWIKPGAIVDVGINR.L<br>K.ATVAAGMASFEHR.L<br>R.NRPLAANPSAFVAEJAFAR.L<br>R.WVLDHGDALATRPAPDFIASK.Q<br>R.WVLDHGDALATRP.P<br>K.AQADPAEAK.W<br>K.WQPHAVYVSCDGNAAATGAWQK.G<br>K.AAIGGVGALGGYLLGDLIGGR.S<br>R.RAASVADYLAGR.G<br>R.AASVADYLAGR.G<br>R.SALDNVAATLAEYPSYIDVYGHDTSTGSETYNQGLSER.R<br>K.IVGAGIGAVAGAGVGYMDQQEK.K<br>R.TAGTGIDVER.Q<br>R.IAPVTQADVNAAG.<br>R.QGQQLVLMNPGDVTFDLNSAMVK.S<br>R.MATLGYESQJK.C<br>R.ERTAGTIDVER.Q<br>K.IVGAGIGAVAGAGVGYMDQQEK.L<br>R.SALDNVAATLAEYPSYIDVYGHDTSTGSETYNQGLSER.R<br>R.QGQQLVLMNPGDVTFDLNSAMVK.S<br>R.QGQQLVLMNPGDVTFDLNSAMVK.S<br>R.MATLGYESQJK.C<br>K.IVGAGIGAVAGAGVGYMDQQEK.L<br>K.IVGAGIGAVAGAGVGYMDQQEK.K<br>R.QGQQLVLMNPGDVTFDLNSAMVK.S<br>K.CAPERTEADYQCNR.R                                                                                                                                                                                                                                                                                                                                                                                                                                                                                                                                                                                                                                                                                                                                                                                                                                                                                                                                                                                                                                                                                                                                                                                                                                                                                                                                                                                                                                                                                                                                                                                                                                                                                                                                                                                                                                                                                                                                                                                                                                                                                                                                                                                                                                                                                                                                                                                                                                                                                                                                                                                                                                              |
| YP_618138 | Sala_3101 | OmpA/MotB                                       | 74.78%            | 19                      | R.IADVAPEFR.A<br>R.LVGDVYAAALGVADAITVPGVGPMTIACLLR.N<br>R.ADIVVAVGR.A<br>K.GDWIKPGAIVDVGINR.L<br>K.ATVAAGMASFEHR.L<br>R.NRPLAANPSAFVAEJAFAR.L<br>R.WVLDHGDALATRPAPDFIASK.Q<br>R.WVLDHGDALATRP.P<br>K.AQADPAEAK.W<br>K.WQPHAVYVSCDGNAAATGAWQK.G<br>K.AAIGGVGALGGYLLGDLIGGR.S<br>R.RAASVADYLAGR.G<br>R.AASVADYLAGR.G<br>R.SALDNVAATLAEYPSYIDVYGHDTSTGSETYNQGLSER.R<br>K.IVGAGIGAVAGAGVGYMDQQEK.K<br>R.TAGTGIDVER.Q<br>R.IAPVTQADVNAAG.<br>R.QGQQLVLMNPGDVTFDLNSAMVK.S<br>R.MATLGYESQJK.C<br>R.ERTAGTIDVER.Q<br>K.IVGAGIGAVAGAGVGYMDQQEK.L<br>R.SALDNVAATLAEYPSYIDVYGHDTSTGSETYNQGLSER.R<br>R.QGQQLVLMNPGDVTFDLNSAMVK.S<br>R.QGQQLVLMNPGDVTFDLNSAMVK.S<br>R.MATLGYESQJK.C<br>K.IVGAGIGAVAGAGVGYMDQQEK.L<br>K.IVGAGIGAVAGAGVGYMDQQEK.K<br>R.QGQQLVLMNPGDVTFDLNSAMVK.S<br>K.CAPERTEADYQCNR.R                                                                                                                                                                                                                                                                                                                                                                                                                                                                                                                                                                                                                                                                                                                                                                                                                                                                                                                                                                                                                                                                                                                                                                                                                                                                                                                                                                                                                                                                                                                                                                                                                                                                                                                                                                                                                                                                                                                                                                                                                                                                                                                                                                                                                                                                                                                                                                                                                                                                                                                                                                                                                                              |
| YP_618139 | Sala_3102 | protein of unknown function DUF21               | 29.18%            | 9                       | R.IADVAPEFR.A<br>R.LVGDVYAAALGVADAITVPGVGPMTIACLLR.N<br>R.ADIVVAVGR.A<br>K.GDWIKPGAIVDVGINR.L<br>K.ATVAAGMASFEHR.L<br>R.NRPLAANPSAFVAEJAFAR.L<br>R.WVLDHGDALATRPAPDFIASK.Q<br>R.WVLDHGDALATRP.P<br>K.AQADPAEAK.W<br>K.WQPHAVYVSCDGNAAATGAWQK.G<br>K.AAIGGVGALGGYLLGDLIGGR.S<br>R.RAASVADYLAGR.G<br>R.AASVADYLAGR.G<br>R.SALDNVAATLAEYPSYIDVYGHDTSTGSETYNQGLSER.R<br>K.IVGAGIGAVAGAGVGYMDQQEK.K<br>R.TAGTGIDVER.Q<br>R.IAPVTQADVNAAG.<br>R.QGQQLVLMNPGDVTFDLNSAMVK.S<br>R.MATLGYESQJK.C<br>R.ERTAGTIDVER.Q<br>K.IVGAGIGAVAGAGVGYMDQQEK.L<br>R.SALDNVAATLAEYPSYIDVYGHDTSTGSETYNQGLSER.R<br>R.QGQQLVLMNPGDVTFDLNSAMVK.S<br>R.QGQQLVLMNPGDVTFDLNSAMVK.S<br>R.MATLGYESQJK.C<br>K.IVGAGIGAVAGAGVGYMDQQEK.L<br>K.IVGAGIGAVAGAGVGYMDQQEK.K<br>R.QGQQLVLMNPGDVTFDLNSAMVK.S<br>K.CAPERTEADYQCNR.R                                                                                                                                                                                                                                                                                                                                                                                                                                                                                                                                                                                                                                                                                                                                                                                                                                                                                                                                                                                                                                                                                                                                                                                                                                                                                                                                                                                                                                                                                                                                                                                                                                                                                                                                                                                                                                                                                                                                                                                                                                                                                                                                                                                                                                                                                                                                                                                                                                                                                                                                                                                                                                              |
| YP_618140 | Sala_3103 | hypothetical protein                            | 49.73%            | 6                       | R.FQQIADWTDADVAR.I<br>R.DNLDIQASYLR.G<br>R.IDAQLGAFQGR.I<br>K.LGALLNGLGTR.F<br>R.FRPVPPVAEPAVEAAIPEPTVPPPPAPAPATAK.A<br>K.ADNLLK.K<br>R.FRGLLAALLHAATGR.L<br>R.AHAIDFVVGPPEAPLVAGLADR.L<br>R.IADAIEVGGVR.V<br>R.VLNVATGK.S<br>R.RIADAEVGGVR.V<br>R.IIRPTVGTLEAEATPYVGVFLAGLMLTAEQPK.L<br>R.VGQDGTGPMTGGMGAYSPAVLTPDLEAVAMER.I<br>R.DGALLHAATGR.L<br>R.AEPPTFHHDYALTVVMAAK.G<br>R.TLVAAGGR.V<br>R.CTSADEALALDGFDPVVK.A<br>R.ASIFTAAYR.C<br>R.AIGVPVFGSAAAAR.L<br>R.TIGVTSPTGAIVR.D<br>R.DAGGAIVTSAK.A<br>R.QRLDDVGER.L<br>R.PDLVIVAR.G<br>R.LAFRPEDSIEVIATGK.L<br>K.VARPDVIVAR.G<br>R.VRHDLVLTGAEEQAVITGR.A<br>R.IVRPITVAAGR.W<br>R.GGATSDADFAR.R<br>R.YSDYSIEGAGGYDTWTWK.A<br>R.VDLMNPLALIER.V<br>R.VDALTGAAVTYGADAITGVVNFVTKR.D<br>R.RNPITGGLDGPSTTPGLFLTNQGR.L<br>R.KYTAQASDLLAK.T<br>R.FSGTRPLDPVTGQSTDPDTPVANGGLR.Q<br>K.AGGSWEPGAGVK.F<br>R.VDALTGAAVTYGADAITGVVNFVTKR.R<br>R.NPNLEQSTPNVITADTIELK.Q<br>R.ISDYQTFDYR.V<br>R.AIVSGDLGFASPGAVQPIGFALGGEYR.K<br>K.YTAQASDLLAK.T<br>K.FNANVANPDSLNR.E<br>K.AQHYFDLTAR.F<br>R.NPITGGLDGPSTTPGLFLTNQGR.L<br>R.FNMSIDYNIK.I<br>R.ELPGVANIGSAVNNNGSASYDLR.G<br>R.AIVSGDLGFASPGAVQPIGFALGGEYR.Y<br>R.PFSNDTLDYSNQFIGSGTSVPSR.F<br>R.NIVLLNGNR.V<br>R.FNIVYQANVSDSVEVYTR.G<br>R.DFAGLEVTSANQITEEDGCHIFR.V<br>K.VDLSLLWR.W<br>K.ADTWTIGLVWQPDFLPR.F<br>K.QSNVAEVL.R.E<br>R.VDATIGANFDGGR.G<br>R.FTLGFDKVDLSLLWR.W<br>R.VAPSDVNGRVDLNNIPLALIER.V<br>R.RTPEVGR.I<br>K.NTVSTIIAPSGSFGGTVVNLNPNPLPSTLR.N<br>R.GNAVLSIGYQADPVYQGAR.P<br>R.GGTDITDWSVEGAYGESENIQTQNYTLQSR.F<br>R.QVNAAGAVPTFATNPNFNFQTPFER.F<br>R.ECVGYVSNCSFTSGIQEFQFSNR.F<br>K.FNANVANPDSLNR.ECVGYVSNCSFTSGIQEFQFSNR.F<br>K.INDVLTGTLPGDIIAACFDNVAASASDPACTSIR.R<br>R.VDATIGANFDDGRGNAVLSIGYQADPVYQGAR.P<br>R.TDPNREVTVTLNR.R<br>K.RDFAGLEVTSANQITEEDGCHIFR.V<br>K.INDVLTGTLPGDIIAACFDNVAASASDPACTSIR.R<br>R.VAPSDVNGR.V<br>R.TSLAQVR.A<br>R.TPEVGR.I<br>K.FRGNYSR.A<br>R.NQFCANVAAAGSGLYTPR.F<br>R.FTAECAAAATATGR.T<br>R.FNMSIDYNIK.I<br>R.EVTTLNR.R<br>R.SVKAQHYFDLTAR.F                                                                                                                                                                                                                                                                                                                                                                                                                                                                                                                                                                                                                                                                                                                                                                                                                                                                                                                                                                                                                                                                                                                                                                                                                                                                                                                                                                                                                                                     |
| YP_618141 | Sala_3104 | phosphoribosylamine--glycine ligase             | 47.69%            | 13                      | R.FRGLLAALLHAATGR.L<br>R.AHAIDFVVGPPEAPLVAGLADR.L<br>R.IADAIEVGGVR.V<br>R.VLNVATGK.S<br>R.RIADAEVGGVR.V<br>R.IIRPTVGTLEAEATPYVGVFLAGLMLTAEQPK.L<br>R.VGQDGTGPMTGGMGAYSPAVLTPDLEAVAMER.I<br>R.DGALLHAATGR.L<br>R.AEPPTFHHDYALTVVMAAK.G<br>R.TLVAAGGR.V<br>R.CTSADEALALDGFDPVVK.A<br>R.ASIFTAAYR.C<br>R.AIGVPVFGSAAAAR.L<br>R.TIGVTSPTGAIVR.D<br>R.DAGGAIVTSAK.A<br>R.QRLDDVGER.L<br>R.PDLVIVAR.G<br>R.LAFRPEDSIEVIATGK.L<br>K.VARPDVIVAR.G<br>R.VRHDLVLTGAEEQAVITGR.A<br>R.IVRPITVAAGR.W<br>R.GGATSDADFAR.R<br>R.YSDYSIEGAGGYDTWTWK.A<br>R.VDLMNPLALIER.V<br>R.VDALTGAAVTYGADAITGVVNFVTKR.D<br>R.RNPITGGLDGPSTTPGLFLTNQGR.L<br>R.KYTAQASDLLAK.T<br>R.FSGTRPLDPVTGQSTDPDTPVANGGLR.Q<br>K.AGGSWEPGAGVK.F<br>R.VDALTGAAVTYGADAITGVVNFVTKR.R<br>R.NPNLEQSTPNVITADTIELK.Q<br>R.ISDYQTFDYR.V<br>R.AIVSGDLGFASPGAVQPIGFALGGEYR.K<br>K.YTAQASDLLAK.T<br>K.FNANVANPDSLNR.E<br>K.AQHYFDLTAR.F<br>R.NPITGGLDGPSTTPGLFLTNQGR.L<br>R.FNMSIDYNIK.I<br>R.ELPGVANIGSAVNNNGSASYDLR.G<br>R.AIVSGDLGFASPGAVQPIGFALGGEYR.Y<br>R.PFSNDTLDYSNQFIGSGTSVPSR.F<br>R.NIVLLNGNR.V<br>R.FNIVYQANVSDSVEVYTR.G<br>R.DFAGLEVTSANQITEEDGCHIFR.V<br>K.VDLSLLWR.W<br>K.ADTWTIGLVWQPDFLPR.F<br>K.QSNVAEVL.R.E<br>R.VDATIGANFDGGR.G<br>R.FTLGFDKVDLSLLWR.W<br>R.VAPSDVNGRVDLNNIPLALIER.V<br>R.RTPEVGR.I<br>K.NTVSTIIAPSGSFGGTVVNLNPNPLPSTLR.N<br>R.GNAVLSIGYQADPVYQGAR.P<br>R.GGTDITDWSVEGAYGESENIQTQNYTLQSR.F<br>R.QVNAAGAVPTFATNPNFNFQTPFER.F<br>R.ECVGYVSNCSFTSGIQEFQFSNR.F<br>K.FNANVANPDSLNR.ECVGYVSNCSFTSGIQEFQFSNR.F<br>K.INDVLTGTLPGDIIAACFDNVAASASDPACTSIR.R<br>R.VDATIGANFDDGRGNAVLSIGYQADPVYQGAR.P<br>R.TDPNREVTVTLNR.R<br>K.RDFAGLEVTSANQITEEDGCHIFR.V<br>K.INDVLTGTLPGDIIAACFDNVAASASDPACTSIR.R<br>R.VAPSDVNGR.V<br>R.TSLAQVR.A<br>R.TPEVGR.I<br>K.FRGNYSR.A<br>R.NQFCANVAAAGSGLYTPR.F<br>R.FTAECAAAATATGR.T<br>R.FNMSIDYNIK.I<br>R.EVTTLNR.R<br>R.SVKAQHYFDLTAR.F                                                                                                                                                                                                                                                                                                                                                                                                                                                                                                                                                                                                                                                                                                                                                                                                                                                                                                                                                                                                                                                                                                                                                                                                                                                                                                                                                                                                                                                                                                                                                                                           |
| YP_618142 | Sala_3105 | exodeoxyribonuclease VII, large subunit         | 13.05%            | 6                       | R.PDLVIVAR.G<br>R.LAFRPEDSIEVIATGK.L<br>K.VARPDVIVAR.G<br>R.VRHDLVLTGAEEQAVITGR.A<br>R.IVRPITVAAGR.W<br>R.GGATSDADFAR.R<br>R.YSDYSIEGAGGYDTWTWK.A<br>R.VDLMNPLALIER.V<br>R.VDALTGAAVTYGADAITGVVNFVTKR.D<br>R.RNPITGGLDGPSTTPGLFLTNQGR.L<br>R.KYTAQASDLLAK.T<br>R.FSGTRPLDPVTGQSTDPDTPVANGGLR.Q<br>K.AGGSWEPGAGVK.F<br>R.VDALTGAAVTYGADAITGVVNFVTKR.R<br>R.NPNLEQSTPNVITADTIELK.Q<br>R.ISDYQTFDYR.V<br>R.AIVSGDLGFASPGAVQPIGFALGGEYR.K<br>K.YTAQASDLLAK.T<br>K.FNANVANPDSLNR.E<br>K.AQHYFDLTAR.F<br>R.NPITGGLDGPSTTPGLFLTNQGR.L<br>R.FNMSIDYNIK.I<br>R.ELPGVANIGSAVNNNGSASYDLR.G<br>R.AIVSGDLGFASPGAVQPIGFALGGEYR.Y<br>R.PFSNDTLDYSNQFIGSGTSVPSR.F<br>R.NIVLLNGNR.V<br>R.FNIVYQANVSDSVEVYTR.G<br>R.DFAGLEVTSANQITEEDGCHIFR.V<br>K.VDLSLLWR.W<br>K.ADTWTIGLVWQPDFLPR.F<br>K.QSNVAEVL.R.E<br>R.VDATIGANFDGGR.G<br>R.FTLGFDKVDLSLLWR.W<br>R.VAPSDVNGRVDLNNIPLALIER.V<br>R.RTPEVGR.I<br>K.NTVSTIIAPSGSFGGTVVNLNPNPLPSTLR.N<br>R.GNAVLSIGYQADPVYQGAR.P<br>R.GGTDITDWSVEGAYGESENIQTQNYTLQSR.F<br>R.QVNAAGAVPTFATNPNFNFQTPFER.F<br>R.ECVGYVSNCSFTSGIQEFQFSNR.F<br>K.FNANVANPDSLNR.ECVGYVSNCSFTSGIQEFQFSNR.F<br>K.INDVLTGTLPGDIIAACFDNVAASASDPACTSIR.R<br>R.VDATIGANFDDGRGNAVLSIGYQADPVYQGAR.P<br>R.TDPNREVTVTLNR.R<br>K.RDFAGLEVTSANQITEEDGCHIFR.V<br>K.INDVLTGTLPGDIIAACFDNVAASASDPACTSIR.R<br>R.VAPSDVNGR.V<br>R.TSLAQVR.A<br>R.TPEVGR.I<br>K.FRGNYSR.A<br>R.NQFCANVAAAGSGLYTPR.F<br>R.FTAECAAAATATGR.T<br>R.FNMSIDYNIK.I<br>R.EVTTLNR.R<br>R.SVKAQHYFDLTAR.F                                                                                                                                                                                                                                                                                                                                                                                                                                                                                                                                                                                                                                                                                                                                                                                                                                                                                                                                                                                                                                                                                                                                                                                                                                                                                                                                                                                                                                                                                                                                                                                                                                                                                                                                                                                                                                                                                                                                                                              |
| YP_618144 | Sala_3107 | peptidase M23B                                  | 13.86%            | 3                       | R.VRHDLVLTGAEEQAVITGR.A<br>R.IVRPITVAAGR.W<br>R.GGATSDADFAR.R<br>R.YSDYSIEGAGGYDTWTWK.A<br>R.VDLMNPLALIER.V<br>R.VDALTGAAVTYGADAITGVVNFVTKR.D<br>R.RNPITGGLDGPSTTPGLFLTNQGR.L<br>R.KYTAQASDLLAK.T<br>R.FSGTRPLDPVTGQSTDPDTPVANGGLR.Q<br>K.AGGSWEPGAGVK.F<br>R.VDALTGAAVTYGADAITGVVNFVTKR.R<br>R.NPNLEQSTPNVITADTIELK.Q<br>R.ISDYQTFDYR.V<br>R.AIVSGDLGFASPGAVQPIGFALGGEYR.K<br>K.YTAQASDLLAK.T<br>K.FNANVANPDSLNR.E<br>K.AQHYFDLTAR.F<br>R.NPITGGLDGPSTTPGLFLTNQGR.L<br>R.FNMSIDYNIK.I<br>R.ELPGVANIGSAVNNNGSASYDLR.G<br>R.AIVSGDLGFASPGAVQPIGFALGGEYR.Y<br>R.PFSNDTLDYSNQFIGSGTSVPSR.F<br>R.NIVLLNGNR.V<br>R.FNIVYQANVSDSVEVYTR.G<br>R.DFAGLEVTSANQITEEDGCHIFR.V<br>K.VDLSLLWR.W<br>K.ADTWTIGLVWQPDFLPR.F<br>K.QSNVAEVL.R.E<br>R.VDATIGANFDGGR.G<br>R.FTLGFDKVDLSLLWR.W<br>R.VAPSDVNGRVDLNNIPLALIER.V<br>R.RTPEVGR.I<br>K.NTVSTIIAPSGSFGGTVVNLNPNPLPSTLR.N<br>R.GNAVLSIGYQADPVYQGAR.P<br>R.GGTDITDWSVEGAYGESENIQTQNYTLQSR.F<br>R.QVNAAGAVPTFATNPNFNFQTPFER.F<br>R.ECVGYVSNCSFTSGIQEFQFSNR.F<br>K.FNANVANPDSLNR.ECVGYVSNCSFTSGIQEFQFSNR.F<br>K.INDVLTGTLPGDIIAACFDNVAASASDPACTSIR.R<br>R.VDATIGANFDDGRGNAVLSIGYQADPVYQGAR.P<br>R.TDPNREVTVTLNR.R<br>K.RDFAGLEVTSANQITEEDGCHIFR.V<br>K.INDVLTGTLPGDIIAACFDNVAASASDPACTSIR.R<br>R.VAPSDVNGR.V<br>R.TSLAQVR.A<br>R.TPEVGR.I<br>K.FRGNYSR.A<br>R.NQFCANVAAAGSGLYTPR.F<br>R.FTAECAAAATATGR.T<br>R.FNMSIDYNIK.I<br>R.EVTTLNR.R<br>R.SVKAQHYFDLTAR.F                                                                                                                                                                                                                                                                                                                                                                                                                                                                                                                                                                                                                                                                                                                                                                                                                                                                                                                                                                                                                                                                                                                                                                                                                                                                                                                                                                                                                                                                                                                                                                                                                                                                                                                                                                                                                                                                                                                                                                                                                                        |
| YP_618145 | Sala_3108 | TonB-dependent receptor                         | 68.82%            | 56                      | R.YSDYSIEGAGGYDTWTWK.A<br>R.VDLMNPLALIER.V<br>R.VDALTGAAVTYGADAITGVVNFVTKR.D<br>R.RNPITGGLDGPSTTPGLFLTNQGR.L<br>R.KYTAQASDLLAK.T<br>R.FSGTRPLDPVTGQSTDPDTPVANGGLR.Q<br>K.AGGSWEPGAGVK.F<br>R.VDALTGAAVTYGADAITGVVNFVTKR.R<br>R.NPNLEQSTPNVITADTIELK.Q<br>R.ISDYQTFDYR.V<br>R.AIVSGDLGFASPGAVQPIGFALGGEYR.K<br>K.YTAQASDLLAK.T<br>K.FNANVANPDSLNR.E<br>K.AQHYFDLTAR.F<br>R.NPITGGLDGPSTTPGLFLTNQGR.L<br>R.FNMSIDYNIK.I<br>R.ELPGVANIGSAVNNNGSASYDLR.G<br>R.AIVSGDLGFASPGAVQPIGFALGGEYR.Y<br>R.PFSNDTLDYSNQFIGSGTSVPSR.F<br>R.NIVLLNGNR.V<br>R.FNIVYQANVSDSVEVYTR.G<br>R.DFAGLEVTSANQITEEDGCHIFR.V<br>K.VDLSLLWR.W<br>K.ADTWTIGLVWQPDFLPR.F<br>K.QSNVAEVL.R.E<br>R.VDATIGANFDGGR.G<br>R.FTLGFDKVDLSLLWR.W<br>R.VAPSDVNGRVDLNNIPLALIER.V<br>R.RTPEVGR.I<br>K.NTVSTIIAPSGSFGGTVVNLNPNPLPSTLR.N<br>R.GNAVLSIGYQADPVYQGAR.P<br>R.GGTDITDWSVEGAYGESENIQTQNYTLQSR.F<br>R.QVNAAGAVPTFATNPNFNFQTPFER.F<br>R.ECVGYVSNCSFTSGIQEFQFSNR.F<br>K.FNANVANPDSLNR.ECVGYVSNCSFTSGIQEFQFSNR.F<br>K.INDVLTGTLPGDIIAACFDNVAASASDPACTSIR.R<br>R.VDATIGANFDDGRGNAVLSIGYQADPVYQGAR.P<br>R.TDPNREVTVTLNR.R<br>K.RDFAGLEVTSANQITEEDGCHIFR.V<br>K.INDVLTGTLPGDIIAACFDNVAASASDPACTSIR.R<br>R.VAPSDVNGR.V<br>R.TSLAQVR.A<br>R.TPEVGR.I<br>K.FRGNYSR.A<br>R.NQFCANVAAAGSGLYTPR.F<br>R.FTAECAAAATATGR.T<br>R.FNMSIDYNIK.I<br>R.EVTTLNR.R<br>R.SVKAQHYFDLTAR.F                                                                                                                                                                                                                                                                                                                                                                                                                                                                                                                                                                                                                                                                                                                                                                                                                                                                                                                                                                                                                                                                                                                                                                                                                                                                                                                                                                                                                                                                                                                                                                                                                                                                                                                                                                                                                                                                                                                                                                                                                                                                                                         |

| Accession | Locus tag | Description                                                                  | Sequence coverage | No. peptides identified | List of peptides identified                                                                                                                                                                                                                                                                                                                                                                                                                                                                                                                                                                                                                                                                                                                                                                                                                                                                                                                                                                                                                                                                                                                                                                                                                                                                                                                                                                                                                                                                                                                                                                                                                                                                                                                                                                                                                                                                                                                                                                                                                                                                                                                                                                                                                                                                                                                                                                                                                                                                                                                                                                                                                                                                                                                                                                                                                                                                                                                                                                                                                                                                                                                                                                                                                                                                                                                                                                                                               |
|-----------|-----------|------------------------------------------------------------------------------|-------------------|-------------------------|-------------------------------------------------------------------------------------------------------------------------------------------------------------------------------------------------------------------------------------------------------------------------------------------------------------------------------------------------------------------------------------------------------------------------------------------------------------------------------------------------------------------------------------------------------------------------------------------------------------------------------------------------------------------------------------------------------------------------------------------------------------------------------------------------------------------------------------------------------------------------------------------------------------------------------------------------------------------------------------------------------------------------------------------------------------------------------------------------------------------------------------------------------------------------------------------------------------------------------------------------------------------------------------------------------------------------------------------------------------------------------------------------------------------------------------------------------------------------------------------------------------------------------------------------------------------------------------------------------------------------------------------------------------------------------------------------------------------------------------------------------------------------------------------------------------------------------------------------------------------------------------------------------------------------------------------------------------------------------------------------------------------------------------------------------------------------------------------------------------------------------------------------------------------------------------------------------------------------------------------------------------------------------------------------------------------------------------------------------------------------------------------------------------------------------------------------------------------------------------------------------------------------------------------------------------------------------------------------------------------------------------------------------------------------------------------------------------------------------------------------------------------------------------------------------------------------------------------------------------------------------------------------------------------------------------------------------------------------------------------------------------------------------------------------------------------------------------------------------------------------------------------------------------------------------------------------------------------------------------------------------------------------------------------------------------------------------------------------------------------------------------------------------------------------------------------|
| YP_618146 | Sala_3109 | hypothetical protein                                                         | 21.70%            | 5                       | R.RYAVSAK.L<br>R.PLDVPTGQSTDPVANGGLR.Q<br>R.NPMLQSTPYNVITADTIELKQSNVAEEVLR.E<br>R.LSDYQITTFDFRVNGAR.G<br>R.FNLYAQANVEVSDSVEVTRGMFSK.N<br>R.ELPGVAVANGSANNVNGSASYDLRGLGSIR.N<br>K.QSNVAEEVRLPVGAVANGSANNVNGSASYVDLR.G<br>R.IASLSETLRLDPVAAIAAAMDHLGLAVDR.G<br>R.GFAAGEAVVVKPSNIFNPLAR.G<br>R.LEFENYADGFVR.L<br>R.DPVAIAAAMDHLGLAVDR.G<br>K.SGAFAFAGER.Q<br>R.YFASADASYAVPR.<br>R.GAAFVASALGR.R<br>R.GHPFWFTEIEAQTDAIR.G<br>R.GELQALLADPGEALRPVVR.M<br>R.GIAALQAGDHEAAAHQHTAASDPHSGALQR.N<br>R.AVLIFDVWPHMTAGER.E<br>R.HGHALTVLDLPADVPDVL.R.N<br>R.AVQFAGLCQSLQFVLSLPE.SR.D<br>K.LTASPLLSLYR.L<br>R.VGAEAGAGVQQR.N<br>R.A.GLENQANQR.Q<br>R.TLIDALRDVADIVASR.A<br>R.AASATADVVALEEAIATR.H<br>R.AALAAATSEAEAR.V<br>R.GTTVDTAPEVAAAAA.V<br>R.IGQPVFELTSDYGGDVVYR.G<br>R.IALADAEALR.L<br>R.IAAGAPIMVIVPIATAYVDANFK.E<br>R.GSASGDLGAAEAVR.G<br>R.ESIAGTGAVSAELTAAR.A<br>R.APVDGIVTNR.Q<br>R.EFDGSDIDYVAFILGQAGK.G<br>R.LIAIDAYTAPAR.A<br>R.IGYIAQDAPSGSATPFETVLAADAER.A<br>R.DAPHLILLDEPTNHLVDAR.E<br>R.LVLVDGGTAR.E<br>R.EALVQALNGFDGAVLIVSHDR.H<br>R.SYFGQLVISHER.D<br>R.DLLNNVHHLLEGK.V<br>K.LAQISAIR.A<br>R.GILLDSTTEGDP.R.L<br>R.GIGGSIYLDR.Y<br>K.IRIPLNEEGAGGGQIEEYLR.A<br>K.VIDLTHHYVYGR.M<br>R.YGDLSDIDDPYEEGVDRHPVAGLK.V<br>R.YFDIKGEYGLTSK.A<br>R.KKDEGFEGNFTALFK.S<br>R.GAEPVETTPGPMELR.L<br>K.AYAEAIER.G<br>R.SKDVQLWR.Q<br>R.LPGHGEPEELK.S<br>R.AYNGEGIQHIAFACDDLYAAWDR.L<br>R.VGSDYELIAAK.A<br>R.HADWLHAAANE.<br>K.AHLEANGVEVLGPTHHGIFK.S<br>R.VAPLMLEEWSR.T<br>K.SYFFDPNKHRIELACDITDEQYALR.R<br>K.LGGVHHAYR.C<br>K.AGLADLAALVLR.H<br>R.LLLTGDLDPAR.G<br>R.GIAQAEVQVQK.E<br>R.APTEELADALFAWTVAK.H<br>K.E.LSNNINDADALELVAEFR.E<br>R.HGVEVSTGCTAK.A<br>K.VVTRAPTEELADALFAWTVAK.H<br>R.YGENPHQK.A<br>R.LAATAFAHTATYDGTIASWFADQGGK.L<br>K.TIAGGWLAQSR.D<br>K.AALYLPAGPAGR.G<br>K.TLHPAVHSGLLAVR.D<br>R.EAAESHGWASPR.T<br>K.GGATAGIGAGQMN.R<br>K.AGLAMVFTGMR.H<br>K.SNAIVYAK.G<br>K.GAARDIEENIDIGGPAMVR.S<br>R.EAGHSVLVDADITGTFEMDGR.V<br>R.HVAAMDAGHIGIDLVVNLYPFAATVAK.G<br>K.NHAFVIVTEPEDYAAIAEMDANGAMTDLR.K<br>K.AREAAESHGWASPR.T<br>R.DIEIENIDIGGPAMVR.S<br>R.DVEIAAANK.A<br>R.ALLSVSKAGLADLAALVLR.H<br>K.RLAATAFAHTATYDGTIASWFADQGGK.L<br>K.HANPCGVATAASLSQAYDAALK.C<br>K.GGATAGIGAGQMN.R<br>R.ADAADDPAVWVDPANPNR.A<br>R.VLASSQGDNAYAVFR.L<br>R.LDGAKPATLGR.V<br>R.ADGAPIAEAVR.T<br>R.LGGGPLWQFR.T<br>K.VLETSPYADGGNISR.S<br>R.LLILSPNGR.E<br>K.LLGVADPVPDGR.A<br>R.TTAHSTLTLADSNSTAILPGGALGK.G<br>R.NISASITADGLGALL.L<br>R.KVLETSPYADGGNISR.S<br>R.ILFWAAHAPLILSSDLYR.S<br>R.HWLGTGETVSEPAWR.A<br>K.LPLGDLDFASLTVAPAFADYLHSAWLR.D<br>K.AVLLADAAPPPIAR.V<br>K.QQCVSLNATPAK.H<br>R.LEVDGGIDAATAPR.A<br>R.IAPSILSADFAK.L<br>K.GGPGAYADNIR.R<br>R.AISAGADVLVAGTATFK.G<br>R.DVAEDAAADR.C<br>R.AVIDDIVAGFLDAR.D<br>R.GIGVYVGGRL.L<br>K.PVGLLNAAGFYNDLIAFNR.R<br>R.LGLMGAVADSALEAGGVEIGIIEALVGAEVAHR.G<br>R.LAVYCGSATPDDPVYIETAR.H<br>R.PAHAGILLVAGLDDLDDK.M<br>R.LGDVAITAHGADR.A<br>R.SVYSIVSVYQDER.L<br>K.LGATFLDR.A<br>R.ATPTGISAVIDADGR.I<br>R.LAPGDIDFWPGPGR.T<br>R.AIEGLPVVR.A<br>K.GVFEDGEWAPGALDEIATVR.R<br>R.FEIGGPDGAGLTKR.K<br>R.EIGYEQAGFHWNR.F<br>K.YVLGVADVLPALLETANTVYHINPTGR.F<br>R.THLGNKPIYR.Q<br>K.VADQISDSIVDLFLAKDPEAR.V<br>K.AGIAPLEPDAK.S<br>K.VADQISDSIVDLFLAK.D<br>R.NSFLTSEVSEGHDPKQVADQISDSIVDLFLAK.D<br>R.KYVLGVADVLPALLETANTVYHINPTGR.F<br>R.KAGIAPLEPDAK.S<br>R.YANERPVEATAIVSTQHAPGYFHNNGEADK.Y<br>R.NSFLTSEVSEGHDPK.V<br>R.IEALVQLVLR.L<br>R.FEIGGPDGAGLTKR.I<br>R.TDLVCLK.A<br>K.GVFEDGEWAPGALDEIATVR.R |
| YP_618147 | Sala_3110 | Aspartyl/Asparaginyl beta-hydroxylase                                        | 27.57%            | 6                       |                                                                                                                                                                                                                                                                                                                                                                                                                                                                                                                                                                                                                                                                                                                                                                                                                                                                                                                                                                                                                                                                                                                                                                                                                                                                                                                                                                                                                                                                                                                                                                                                                                                                                                                                                                                                                                                                                                                                                                                                                                                                                                                                                                                                                                                                                                                                                                                                                                                                                                                                                                                                                                                                                                                                                                                                                                                                                                                                                                                                                                                                                                                                                                                                                                                                                                                                                                                                                                           |
| YP_618150 | Sala_3113 | transcriptional regulator, TetR family                                       | 26.17%            | 3                       |                                                                                                                                                                                                                                                                                                                                                                                                                                                                                                                                                                                                                                                                                                                                                                                                                                                                                                                                                                                                                                                                                                                                                                                                                                                                                                                                                                                                                                                                                                                                                                                                                                                                                                                                                                                                                                                                                                                                                                                                                                                                                                                                                                                                                                                                                                                                                                                                                                                                                                                                                                                                                                                                                                                                                                                                                                                                                                                                                                                                                                                                                                                                                                                                                                                                                                                                                                                                                                           |
| YP_618151 | Sala_3114 | RND efflux system, outer membrane lipoprotein, NodT                          | 15.37%            | 5                       |                                                                                                                                                                                                                                                                                                                                                                                                                                                                                                                                                                                                                                                                                                                                                                                                                                                                                                                                                                                                                                                                                                                                                                                                                                                                                                                                                                                                                                                                                                                                                                                                                                                                                                                                                                                                                                                                                                                                                                                                                                                                                                                                                                                                                                                                                                                                                                                                                                                                                                                                                                                                                                                                                                                                                                                                                                                                                                                                                                                                                                                                                                                                                                                                                                                                                                                                                                                                                                           |
| YP_618152 | Sala_3115 | secretion protein HlyD                                                       | 29.55%            | 7                       |                                                                                                                                                                                                                                                                                                                                                                                                                                                                                                                                                                                                                                                                                                                                                                                                                                                                                                                                                                                                                                                                                                                                                                                                                                                                                                                                                                                                                                                                                                                                                                                                                                                                                                                                                                                                                                                                                                                                                                                                                                                                                                                                                                                                                                                                                                                                                                                                                                                                                                                                                                                                                                                                                                                                                                                                                                                                                                                                                                                                                                                                                                                                                                                                                                                                                                                                                                                                                                           |
| YP_618154 | Sala_3118 | ABC transporter related                                                      | 23.61%            | 9                       |                                                                                                                                                                                                                                                                                                                                                                                                                                                                                                                                                                                                                                                                                                                                                                                                                                                                                                                                                                                                                                                                                                                                                                                                                                                                                                                                                                                                                                                                                                                                                                                                                                                                                                                                                                                                                                                                                                                                                                                                                                                                                                                                                                                                                                                                                                                                                                                                                                                                                                                                                                                                                                                                                                                                                                                                                                                                                                                                                                                                                                                                                                                                                                                                                                                                                                                                                                                                                                           |
| YP_618155 | Sala_3119 | 4-hydroxyphenylpyruvate dioxygenase                                          | 50.69%            | 12                      |                                                                                                                                                                                                                                                                                                                                                                                                                                                                                                                                                                                                                                                                                                                                                                                                                                                                                                                                                                                                                                                                                                                                                                                                                                                                                                                                                                                                                                                                                                                                                                                                                                                                                                                                                                                                                                                                                                                                                                                                                                                                                                                                                                                                                                                                                                                                                                                                                                                                                                                                                                                                                                                                                                                                                                                                                                                                                                                                                                                                                                                                                                                                                                                                                                                                                                                                                                                                                                           |
| YP_618156 | Sala_3120 | Glyoxalase/bleomycin resistance protein/dioxygenase                          | 50.28%            | 6                       |                                                                                                                                                                                                                                                                                                                                                                                                                                                                                                                                                                                                                                                                                                                                                                                                                                                                                                                                                                                                                                                                                                                                                                                                                                                                                                                                                                                                                                                                                                                                                                                                                                                                                                                                                                                                                                                                                                                                                                                                                                                                                                                                                                                                                                                                                                                                                                                                                                                                                                                                                                                                                                                                                                                                                                                                                                                                                                                                                                                                                                                                                                                                                                                                                                                                                                                                                                                                                                           |
| YP_618159 | Sala_3123 | phosphoribosylaminoimidazolecarboxamide formyltransferase/IMP cyclohydrolase | 64.49%            | 27                      |                                                                                                                                                                                                                                                                                                                                                                                                                                                                                                                                                                                                                                                                                                                                                                                                                                                                                                                                                                                                                                                                                                                                                                                                                                                                                                                                                                                                                                                                                                                                                                                                                                                                                                                                                                                                                                                                                                                                                                                                                                                                                                                                                                                                                                                                                                                                                                                                                                                                                                                                                                                                                                                                                                                                                                                                                                                                                                                                                                                                                                                                                                                                                                                                                                                                                                                                                                                                                                           |
| YP_618160 | Sala_3124 | 3-phytase                                                                    | 13.74%            | 3                       |                                                                                                                                                                                                                                                                                                                                                                                                                                                                                                                                                                                                                                                                                                                                                                                                                                                                                                                                                                                                                                                                                                                                                                                                                                                                                                                                                                                                                                                                                                                                                                                                                                                                                                                                                                                                                                                                                                                                                                                                                                                                                                                                                                                                                                                                                                                                                                                                                                                                                                                                                                                                                                                                                                                                                                                                                                                                                                                                                                                                                                                                                                                                                                                                                                                                                                                                                                                                                                           |
| YP_618163 | Sala_3127 | Heparinase II/III-like protein                                               | 30.57%            | 12                      |                                                                                                                                                                                                                                                                                                                                                                                                                                                                                                                                                                                                                                                                                                                                                                                                                                                                                                                                                                                                                                                                                                                                                                                                                                                                                                                                                                                                                                                                                                                                                                                                                                                                                                                                                                                                                                                                                                                                                                                                                                                                                                                                                                                                                                                                                                                                                                                                                                                                                                                                                                                                                                                                                                                                                                                                                                                                                                                                                                                                                                                                                                                                                                                                                                                                                                                                                                                                                                           |
| YP_618164 | Sala_3128 | Ribulose-phosphate 3-epimerase                                               | 30.04%            | 5                       |                                                                                                                                                                                                                                                                                                                                                                                                                                                                                                                                                                                                                                                                                                                                                                                                                                                                                                                                                                                                                                                                                                                                                                                                                                                                                                                                                                                                                                                                                                                                                                                                                                                                                                                                                                                                                                                                                                                                                                                                                                                                                                                                                                                                                                                                                                                                                                                                                                                                                                                                                                                                                                                                                                                                                                                                                                                                                                                                                                                                                                                                                                                                                                                                                                                                                                                                                                                                                                           |
| YP_618168 | Sala_3132 | Squalene/phytoene synthase                                                   | 7.65%             | 2                       |                                                                                                                                                                                                                                                                                                                                                                                                                                                                                                                                                                                                                                                                                                                                                                                                                                                                                                                                                                                                                                                                                                                                                                                                                                                                                                                                                                                                                                                                                                                                                                                                                                                                                                                                                                                                                                                                                                                                                                                                                                                                                                                                                                                                                                                                                                                                                                                                                                                                                                                                                                                                                                                                                                                                                                                                                                                                                                                                                                                                                                                                                                                                                                                                                                                                                                                                                                                                                                           |
| YP_618169 | Sala_3133 | conserved hypothetical protein 730                                           | 52.85%            | 5                       |                                                                                                                                                                                                                                                                                                                                                                                                                                                                                                                                                                                                                                                                                                                                                                                                                                                                                                                                                                                                                                                                                                                                                                                                                                                                                                                                                                                                                                                                                                                                                                                                                                                                                                                                                                                                                                                                                                                                                                                                                                                                                                                                                                                                                                                                                                                                                                                                                                                                                                                                                                                                                                                                                                                                                                                                                                                                                                                                                                                                                                                                                                                                                                                                                                                                                                                                                                                                                                           |
| YP_618170 | Sala_3134 | amine oxidase                                                                | 7.72%             | 3                       |                                                                                                                                                                                                                                                                                                                                                                                                                                                                                                                                                                                                                                                                                                                                                                                                                                                                                                                                                                                                                                                                                                                                                                                                                                                                                                                                                                                                                                                                                                                                                                                                                                                                                                                                                                                                                                                                                                                                                                                                                                                                                                                                                                                                                                                                                                                                                                                                                                                                                                                                                                                                                                                                                                                                                                                                                                                                                                                                                                                                                                                                                                                                                                                                                                                                                                                                                                                                                                           |
| YP_618174 | Sala_3138 | apolipoprotein N-acyltransferase                                             | 6.98%             | 3                       |                                                                                                                                                                                                                                                                                                                                                                                                                                                                                                                                                                                                                                                                                                                                                                                                                                                                                                                                                                                                                                                                                                                                                                                                                                                                                                                                                                                                                                                                                                                                                                                                                                                                                                                                                                                                                                                                                                                                                                                                                                                                                                                                                                                                                                                                                                                                                                                                                                                                                                                                                                                                                                                                                                                                                                                                                                                                                                                                                                                                                                                                                                                                                                                                                                                                                                                                                                                                                                           |
| YP_618175 | Sala_3139 | Methionine adenosyltransferase                                               | 84.98%            | 27                      |                                                                                                                                                                                                                                                                                                                                                                                                                                                                                                                                                                                                                                                                                                                                                                                                                                                                                                                                                                                                                                                                                                                                                                                                                                                                                                                                                                                                                                                                                                                                                                                                                                                                                                                                                                                                                                                                                                                                                                                                                                                                                                                                                                                                                                                                                                                                                                                                                                                                                                                                                                                                                                                                                                                                                                                                                                                                                                                                                                                                                                                                                                                                                                                                                                                                                                                                                                                                                                           |

| Accession | Locus tag | Description                                                               | Sequence coverage | No. peptides identified | List of peptides identified                                                                                                                                                                                                                                                                                                                                                                                                                                                                                                                                                                                                                                                                                                                                                                                                                                                                                                                                                                                                                                                                                                                                                                                                                                                                                                                                                                                                                                                                                                                                                                                                                                                                                                                                                                                                                                                                                                                                                                                                                                                                                                                                                                                                                                                                                                                                                                                                                                                                                                                                                                                                                                                                                                                                                                                                                                                                                                                                                                                                                                                                                                                                                                                                                                                                                                                                                                                                     |
|-----------|-----------|---------------------------------------------------------------------------|-------------------|-------------------------|---------------------------------------------------------------------------------------------------------------------------------------------------------------------------------------------------------------------------------------------------------------------------------------------------------------------------------------------------------------------------------------------------------------------------------------------------------------------------------------------------------------------------------------------------------------------------------------------------------------------------------------------------------------------------------------------------------------------------------------------------------------------------------------------------------------------------------------------------------------------------------------------------------------------------------------------------------------------------------------------------------------------------------------------------------------------------------------------------------------------------------------------------------------------------------------------------------------------------------------------------------------------------------------------------------------------------------------------------------------------------------------------------------------------------------------------------------------------------------------------------------------------------------------------------------------------------------------------------------------------------------------------------------------------------------------------------------------------------------------------------------------------------------------------------------------------------------------------------------------------------------------------------------------------------------------------------------------------------------------------------------------------------------------------------------------------------------------------------------------------------------------------------------------------------------------------------------------------------------------------------------------------------------------------------------------------------------------------------------------------------------------------------------------------------------------------------------------------------------------------------------------------------------------------------------------------------------------------------------------------------------------------------------------------------------------------------------------------------------------------------------------------------------------------------------------------------------------------------------------------------------------------------------------------------------------------------------------------------------------------------------------------------------------------------------------------------------------------------------------------------------------------------------------------------------------------------------------------------------------------------------------------------------------------------------------------------------------------------------------------------------------------------------------------------------|
|           |           |                                                                           |                   |                         | K.NIVAAGLAR.R<br>R.QADGDAFPWER.T<br>R.SAAYTR.Y<br>K.IIVDTYGGASPHGGGAFSGKDPK.V<br>K.IIVDTYGGASPHGGGAFSGK.D<br>R.VACETLTTQLVVLAGEIR.C<br>R.QTAAYGHFGR.Q<br>K.IIVDTYGGASPHGGGAFSGKDPKVD.R.S<br>R.FENNLHGQSPQIAQGVDEGAGK.D<br>K.DEGAGDQGHFYGASDETPDPHPATLDYSHK.I<br>R.RIPDGAALFVYLHPDPWP.K.A<br>R.AGQQDLVDTLLPQJAVPLDGEVTAR.R<br>R.IPDGALAFVYLHPDPWP.K.A<br>R.MMNDGPLDLIAAKL.K.P<br>K.ARAQGHVWVYFR.W<br>R.SVGLTQACEMFFER.A<br>R.SFSAAAADLVSPSAISQTIK.A<br>R.AFIDYVRNLPDDITR.<br>R.MGESLDADVAVR.L<br>R.FVVAGAPSYFAR.H<br>R.AAPAYGLADYEAAR.N<br>R.NIDWPLFLR.L<br>R.IHVVEITFGASGLSHLFHR.N<br>K.VVAPLAAVGGFLDAAGGGGWVVTSNLLVQGGEP.R.K<br>K.NAAAIAAGEMEELTESSVEFIEK.A<br>R.ISNEELVASFNR.Y<br>R.THGGIDQSGPK.T<br>R.DRDSHFIFGVATAILVEDR.A<br>R.AJAPDGHWDLSTR.L<br>K.TDKLFVQEGR.K<br>R.LWLHQANVMNR.L<br>K.EVVPVAMIVGEMEK.L<br>R.NNFGFLNR.T<br>R.NGELSILAEIGVAAK.D<br>R.DSHIFGVATAILVEDR.A<br>R.AGRDAGDVAIVLCAASNMQR.A<br>K.AGILDPEHMAPR.L<br>R.KPTGDIVAVEAVR.L<br>K.VAVNSAAVARPELVADIADR.F<br>R.DAGDPVEAAR.A<br>R.GTLLDLSR.T<br>R.DGYDLALTR.A<br>R.ATVYGDPAQAAR.R<br>R.ALYDGRDLAEIAAGAA.<br>R.RFEDAGVAALLFTDVG.R.D<br>R.VIIGTAAALDPEFVK.S<br>LAALTFPAIDLKAGQVVR.L<br>K.SQAYGLATLER.F<br>R.SVHNALVAAGADTVAVTADPDAVAR.A<br>K.DNVVQVGFHEK.S<br>R.KGDAIPSTK.G<br>R.YGEAHAPMDETITR.C<br>R.HSLDLSNQVK.G<br>R.YGEAHAPMDETITR.C<br>K.TQAPGVDIPALVAK.F<br>R.DSLIPYDEIVQDALR.A<br>R.VLSQVEGTDLSLPEHGHYITFK.T<br>K.FPDEMIVLQNR.F<br>R.LLSLIALDALDAK.A<br>R.NKFEALASNDGLVFFSGALNTLAVALT.I<br>R.YDDQFLAIWQTSGTQSNMNEVIAGLANEALAGR.G<br>R.TESDSIGAIEVPADAYWGAQTER.S<br>R.MPVPIIHALARIK.G<br>R.AGLGELDLPANEPGSSIMPVK.V<br>K.LAGSGTAVGTGLNAPAGFDAAIAELSR.A<br>K.LADAAEAADVAAGR.Y<br>R.YALLAATVAGAYLTR.K<br>R.GNHPHPIAGTIIGAGTLMAAR.R<br>R.GTDSDEVIAR.M<br>R.GVLFVLSVSGAGK.T<br>R.ARGTDSDEVIAR.M<br>R.APVEELLAAGK.D<br>R.VFVLPPTMEELER.R<br>R.APVEELLAAGKDLVDFIDWGAQQLYQEAQDPVVR.V<br>K.MAADGAFLEWAHVFGRH.Y<br>K.DVLFIDWGAQQLYQEAQDPVVR.V<br>R.WNTLPGFDTPLAGAPQNR.D<br>R.GAVNVTASVAEDGQIGQAAYSASK.G<br>K.VAIFDLQEEKK.A<br>K.GGVGMGLPIAR.D<br>R.DALGASVLPK.R<br>K.VAIFDLQEEK.G<br>R.MKLDSTVAVVTGGASGLGAATAR.A<br>K.LDSTVAVVTGGASGLGAATAR.A<br>R.MKLDSTVAVVTGGASGLGAATAR.A<br>R.ILVNCAGTGNAIK.T<br>R.DLASENIR.V<br>K.SAAGMLTLPMDGER.G<br>R.SKEDGSIK.H<br>K.AIAEELGSIFECNVTDASVIDAAFEK.A<br>K.LAGVHPVQLGAADFVDAIAR.N<br>R.LNQHGGAIALGHPLGASGK.L<br>R.EIVPIEIEIPEGR.E<br>R.NAVLASNLPDIPAVTIDR.Q<br>K.LMATLGLVLDATGGY.Y<br>R.VPMSVATLFIK.E<br>R.IHHSVYTAGDPVIMLEELFATEK.A<br>K.HGFTKDDLDAFALES.R<br>R.AGMTIADIDAYEVNEAFAPVPLAWK.Y<br>K.AATEAGKFER.E<br>R.TAYTDDHEAFR.S<br>K.EVAPNQVWAEQVVPK.S<br>R.VITFGSLQSDIVTIVR.Y<br>K.LQVGHAWLDWALAR.H<br>R.YGSEEQK.H<br>R.AFDDTVYTR.E<br>K.IGQDEADTSELFNDVR.V<br>R.NLDKIGQDEADTSELFNDVR.V<br>R.ALLGESPPWHAAEA.R.L<br>R.LDPDGLTIEFGLMSTNGAASFDPGR.I<br>R.LWVSLTSDPKK.R<br>R.LSPAGELLHTVLPVQRTMIAFGGADLK.T<br>R.IFYHADTPHSHIHAYDVPATGALGGK.R<br>R.IFYHADTPHSHIHAYDVPATGALGGK.L<br>R.PFGPPVADKPR.Q<br>R.TDPATGTDVAMELAEQVGCIAPR.A<br>R.LYVWDIEGCK.I<br>R.FAEGEGRPDGAADVDAEGCYWSALWDGWR.V<br>K.RDAALYR.L<br>R.TDPATGTDVAMELAEQVGCIAPR.A<br>R.LSPAGELLHTVLPVQRTMIAFGGADLK.T<br>K.TAFVTSAGK.N<br>R.DGANLSPADKEK.L<br>K.TNENGVFYLDFAR.D<br>K.FNQGFTEVYLSAIVDMK.L<br>R.SSAQVPLQATNR.K<br>R.LITPTFELDPK.L<br>R.GDNGDANDTNTAIEIK.L<br>R.DFVEYPSQVNEWLMTPVLSK.Y<br>K.LEGLSFAFSSK.L<br>K.SNDRVEEIDAEWSR.L<br>R.VFAMWVQTSNK.S<br>R.TILLMGTNETDRAFAIR.A<br>K.YDLDESEKPYLQDK.L<br>R.VKEEVADMQAIADAEAR.A<br>R.HTSGLDLQQR.I<br>K.YPALAGVPR.D |
| YP_618176 | Sala_3140 | tRNA (guanine-N(7)-)-methyltransferase                                    | 27.80%            | 5                       |                                                                                                                                                                                                                                                                                                                                                                                                                                                                                                                                                                                                                                                                                                                                                                                                                                                                                                                                                                                                                                                                                                                                                                                                                                                                                                                                                                                                                                                                                                                                                                                                                                                                                                                                                                                                                                                                                                                                                                                                                                                                                                                                                                                                                                                                                                                                                                                                                                                                                                                                                                                                                                                                                                                                                                                                                                                                                                                                                                                                                                                                                                                                                                                                                                                                                                                                                                                                                                 |
| YP_618178 | Sala_3142 | transcriptional regulator, LysR family                                    | 29.87%            | 6                       |                                                                                                                                                                                                                                                                                                                                                                                                                                                                                                                                                                                                                                                                                                                                                                                                                                                                                                                                                                                                                                                                                                                                                                                                                                                                                                                                                                                                                                                                                                                                                                                                                                                                                                                                                                                                                                                                                                                                                                                                                                                                                                                                                                                                                                                                                                                                                                                                                                                                                                                                                                                                                                                                                                                                                                                                                                                                                                                                                                                                                                                                                                                                                                                                                                                                                                                                                                                                                                 |
| YP_618179 | Sala_3143 | protein of unknown function DUF81                                         | 25.49%            | 3                       |                                                                                                                                                                                                                                                                                                                                                                                                                                                                                                                                                                                                                                                                                                                                                                                                                                                                                                                                                                                                                                                                                                                                                                                                                                                                                                                                                                                                                                                                                                                                                                                                                                                                                                                                                                                                                                                                                                                                                                                                                                                                                                                                                                                                                                                                                                                                                                                                                                                                                                                                                                                                                                                                                                                                                                                                                                                                                                                                                                                                                                                                                                                                                                                                                                                                                                                                                                                                                                 |
| YP_618181 | Sala_3145 | 3-oxoacyl-(acyl-carrier protein) synthase                                 | 46.30%            | 13                      |                                                                                                                                                                                                                                                                                                                                                                                                                                                                                                                                                                                                                                                                                                                                                                                                                                                                                                                                                                                                                                                                                                                                                                                                                                                                                                                                                                                                                                                                                                                                                                                                                                                                                                                                                                                                                                                                                                                                                                                                                                                                                                                                                                                                                                                                                                                                                                                                                                                                                                                                                                                                                                                                                                                                                                                                                                                                                                                                                                                                                                                                                                                                                                                                                                                                                                                                                                                                                                 |
| YP_618182 | Sala_3146 | imidazoleglycerol phosphate synthase, cyclase subunit                     | 23.92%            | 5                       |                                                                                                                                                                                                                                                                                                                                                                                                                                                                                                                                                                                                                                                                                                                                                                                                                                                                                                                                                                                                                                                                                                                                                                                                                                                                                                                                                                                                                                                                                                                                                                                                                                                                                                                                                                                                                                                                                                                                                                                                                                                                                                                                                                                                                                                                                                                                                                                                                                                                                                                                                                                                                                                                                                                                                                                                                                                                                                                                                                                                                                                                                                                                                                                                                                                                                                                                                                                                                                 |
| YP_618183 | Sala_3147 | Phosphoribosylformimino-5- aminoimidazole carboxamide ribotide isomerase  | 33.61%            | 5                       |                                                                                                                                                                                                                                                                                                                                                                                                                                                                                                                                                                                                                                                                                                                                                                                                                                                                                                                                                                                                                                                                                                                                                                                                                                                                                                                                                                                                                                                                                                                                                                                                                                                                                                                                                                                                                                                                                                                                                                                                                                                                                                                                                                                                                                                                                                                                                                                                                                                                                                                                                                                                                                                                                                                                                                                                                                                                                                                                                                                                                                                                                                                                                                                                                                                                                                                                                                                                                                 |
| YP_618184 | Sala_3148 | imidazole glycerol phosphate synthase, glutamine amidotransferase subunit | 23.76%            | 3                       |                                                                                                                                                                                                                                                                                                                                                                                                                                                                                                                                                                                                                                                                                                                                                                                                                                                                                                                                                                                                                                                                                                                                                                                                                                                                                                                                                                                                                                                                                                                                                                                                                                                                                                                                                                                                                                                                                                                                                                                                                                                                                                                                                                                                                                                                                                                                                                                                                                                                                                                                                                                                                                                                                                                                                                                                                                                                                                                                                                                                                                                                                                                                                                                                                                                                                                                                                                                                                                 |
| YP_618185 | Sala_3149 | Imidazoleglycerol-phosphate dehydratase                                   | 17.44%            | 4                       |                                                                                                                                                                                                                                                                                                                                                                                                                                                                                                                                                                                                                                                                                                                                                                                                                                                                                                                                                                                                                                                                                                                                                                                                                                                                                                                                                                                                                                                                                                                                                                                                                                                                                                                                                                                                                                                                                                                                                                                                                                                                                                                                                                                                                                                                                                                                                                                                                                                                                                                                                                                                                                                                                                                                                                                                                                                                                                                                                                                                                                                                                                                                                                                                                                                                                                                                                                                                                                 |
| YP_618186 | Sala_3150 | protein of unknown function DUF1321                                       | 40.00%            | 4                       |                                                                                                                                                                                                                                                                                                                                                                                                                                                                                                                                                                                                                                                                                                                                                                                                                                                                                                                                                                                                                                                                                                                                                                                                                                                                                                                                                                                                                                                                                                                                                                                                                                                                                                                                                                                                                                                                                                                                                                                                                                                                                                                                                                                                                                                                                                                                                                                                                                                                                                                                                                                                                                                                                                                                                                                                                                                                                                                                                                                                                                                                                                                                                                                                                                                                                                                                                                                                                                 |
| YP_618188 | Sala_3152 | fumarate hydratase, class II                                              | 38.64%            | 8                       |                                                                                                                                                                                                                                                                                                                                                                                                                                                                                                                                                                                                                                                                                                                                                                                                                                                                                                                                                                                                                                                                                                                                                                                                                                                                                                                                                                                                                                                                                                                                                                                                                                                                                                                                                                                                                                                                                                                                                                                                                                                                                                                                                                                                                                                                                                                                                                                                                                                                                                                                                                                                                                                                                                                                                                                                                                                                                                                                                                                                                                                                                                                                                                                                                                                                                                                                                                                                                                 |
| YP_618189 | Sala_3153 | hypothetical protein                                                      | 27.87%            | 2                       |                                                                                                                                                                                                                                                                                                                                                                                                                                                                                                                                                                                                                                                                                                                                                                                                                                                                                                                                                                                                                                                                                                                                                                                                                                                                                                                                                                                                                                                                                                                                                                                                                                                                                                                                                                                                                                                                                                                                                                                                                                                                                                                                                                                                                                                                                                                                                                                                                                                                                                                                                                                                                                                                                                                                                                                                                                                                                                                                                                                                                                                                                                                                                                                                                                                                                                                                                                                                                                 |
| YP_618191 | Sala_3155 | Guanylate kinase                                                          | 41.82%            | 8                       |                                                                                                                                                                                                                                                                                                                                                                                                                                                                                                                                                                                                                                                                                                                                                                                                                                                                                                                                                                                                                                                                                                                                                                                                                                                                                                                                                                                                                                                                                                                                                                                                                                                                                                                                                                                                                                                                                                                                                                                                                                                                                                                                                                                                                                                                                                                                                                                                                                                                                                                                                                                                                                                                                                                                                                                                                                                                                                                                                                                                                                                                                                                                                                                                                                                                                                                                                                                                                                 |
| YP_618193 | Sala_3157 | short-chain dehydrogenase/reductase SDR                                   | 62.02%            | 14                      |                                                                                                                                                                                                                                                                                                                                                                                                                                                                                                                                                                                                                                                                                                                                                                                                                                                                                                                                                                                                                                                                                                                                                                                                                                                                                                                                                                                                                                                                                                                                                                                                                                                                                                                                                                                                                                                                                                                                                                                                                                                                                                                                                                                                                                                                                                                                                                                                                                                                                                                                                                                                                                                                                                                                                                                                                                                                                                                                                                                                                                                                                                                                                                                                                                                                                                                                                                                                                                 |
| YP_618194 | Sala_3158 | Acetyl-CoA C-acetyltransferase                                            | 45.24%            | 10                      |                                                                                                                                                                                                                                                                                                                                                                                                                                                                                                                                                                                                                                                                                                                                                                                                                                                                                                                                                                                                                                                                                                                                                                                                                                                                                                                                                                                                                                                                                                                                                                                                                                                                                                                                                                                                                                                                                                                                                                                                                                                                                                                                                                                                                                                                                                                                                                                                                                                                                                                                                                                                                                                                                                                                                                                                                                                                                                                                                                                                                                                                                                                                                                                                                                                                                                                                                                                                                                 |
| YP_618195 | Sala_3159 | acyl-CoA dehydrogenase-like protein                                       | 25.78%            | 8                       |                                                                                                                                                                                                                                                                                                                                                                                                                                                                                                                                                                                                                                                                                                                                                                                                                                                                                                                                                                                                                                                                                                                                                                                                                                                                                                                                                                                                                                                                                                                                                                                                                                                                                                                                                                                                                                                                                                                                                                                                                                                                                                                                                                                                                                                                                                                                                                                                                                                                                                                                                                                                                                                                                                                                                                                                                                                                                                                                                                                                                                                                                                                                                                                                                                                                                                                                                                                                                                 |
| YP_618196 | Sala_3160 | Senescence marker protein-30 (SMP-30)                                     | 69.20%            | 14                      |                                                                                                                                                                                                                                                                                                                                                                                                                                                                                                                                                                                                                                                                                                                                                                                                                                                                                                                                                                                                                                                                                                                                                                                                                                                                                                                                                                                                                                                                                                                                                                                                                                                                                                                                                                                                                                                                                                                                                                                                                                                                                                                                                                                                                                                                                                                                                                                                                                                                                                                                                                                                                                                                                                                                                                                                                                                                                                                                                                                                                                                                                                                                                                                                                                                                                                                                                                                                                                 |
| YP_618197 | Sala_3161 | Peptidyl-dipeptidase Dcp                                                  | 55.91%            | 35                      |                                                                                                                                                                                                                                                                                                                                                                                                                                                                                                                                                                                                                                                                                                                                                                                                                                                                                                                                                                                                                                                                                                                                                                                                                                                                                                                                                                                                                                                                                                                                                                                                                                                                                                                                                                                                                                                                                                                                                                                                                                                                                                                                                                                                                                                                                                                                                                                                                                                                                                                                                                                                                                                                                                                                                                                                                                                                                                                                                                                                                                                                                                                                                                                                                                                                                                                                                                                                                                 |

| Accession | Locus tag | Description                       | Sequence coverage | No. peptides identified | List of peptides identified                                                                                                                                                                                                                                                                                                                                                                                                                                                                                                                                                                                                                                                                                                                                                                                                                                                                                                                                                                                                                                                                                                                                                                                                                                                                                                                                                                                                                                                                                                                                                                                                                                                                                                                                                                                                                                                                                                                                                                                                                                                                                                                                                                                                                                                                                                                                                                                                                                                                                                                                                                                                                                                                                                                                                                                                                                                                                                                                                                                                                                                                                                                                                                                                                                                                                                                                                                                                               |
|-----------|-----------|-----------------------------------|-------------------|-------------------------|-------------------------------------------------------------------------------------------------------------------------------------------------------------------------------------------------------------------------------------------------------------------------------------------------------------------------------------------------------------------------------------------------------------------------------------------------------------------------------------------------------------------------------------------------------------------------------------------------------------------------------------------------------------------------------------------------------------------------------------------------------------------------------------------------------------------------------------------------------------------------------------------------------------------------------------------------------------------------------------------------------------------------------------------------------------------------------------------------------------------------------------------------------------------------------------------------------------------------------------------------------------------------------------------------------------------------------------------------------------------------------------------------------------------------------------------------------------------------------------------------------------------------------------------------------------------------------------------------------------------------------------------------------------------------------------------------------------------------------------------------------------------------------------------------------------------------------------------------------------------------------------------------------------------------------------------------------------------------------------------------------------------------------------------------------------------------------------------------------------------------------------------------------------------------------------------------------------------------------------------------------------------------------------------------------------------------------------------------------------------------------------------------------------------------------------------------------------------------------------------------------------------------------------------------------------------------------------------------------------------------------------------------------------------------------------------------------------------------------------------------------------------------------------------------------------------------------------------------------------------------------------------------------------------------------------------------------------------------------------------------------------------------------------------------------------------------------------------------------------------------------------------------------------------------------------------------------------------------------------------------------------------------------------------------------------------------------------------------------------------------------------------------------------------------------------------|
| YP_618201 | Sala_3165 | Rieske (2Fe-2S) region            | 6.87%             | 3                       | K.TVPAGQNLLQPTWGPYQVPPWVKLDPELFPDAFQK.A<br>K.ITIEPWDR.Y<br>R.LYDLGFRENTGQIPVFDPK.V<br>R.EITGGQIPVFDPK.V<br>R.SSAQPVLNATNRK.L<br>K.LVDGMFWAAGR.L<br>R.SQSLGGER.N<br>R.TFEVYLNK.T<br>R.AELLGFPTHAHR.M<br>K.AEVQAVDNPAPETTFETHVPMMLAGETMER.V<br>R.AFVGRGDGDANDNTATIAELK.L<br>R.TILLMTGNEDR.A<br>R.TGEMPPQVLVDK.I<br>R.SGAWMTTYR.S<br>R.LYDLGFR.E<br>R.ETLAEIGMPK.E<br>R.DFVEVPSQVNNWLMTEVLSK.Y<br>K.TPPTDVDRFER.E<br>K.FNQGFEVYLSAIVDMK.L<br>K.AKYDLDESEVKPYLQDK.L<br>R.INRQVNAEDTALITR.V<br>R.QVNAEDTALITR.V<br>R.LEHAPAAWSNK.<br>R.LVGGEEIAAAR.V<br>R.DAEVLPAYDALENVAELLR.D<br>R.MNVALSELPR.F<br>R.FAGLSLEQQR.D<br>R.DVVGGAARTEEFAPGFR.N<br>R.DHVEISELSPVAK.V<br>K.NYNDVDTYGAR.L<br>R.TYPTSDITQDNAAALVEK.N<br>R.STAVSDDLQTVQYNPENSKDR.W<br>K.FLPSVTIQTAAFGFSQVYFR.G<br>R.HDAGYIDNIAAGSR.T<br>R.GTLPYPGPTLDNYEFGWK.T<br>R.FIGLFWQR.Q<br>R.VEALAGPQGLYGASSMAGTIK.L<br>K.LGNWDLTVGGHLR.R<br>K.FSDDALVATWSR.G<br>K.REENLQDVLTAITAGNER.L<br>K.LVTRNRPDPSGTYSGLGLENSVAHGOVGGVAEGFVNAPLGER.A<br>R.STAVSDDLQTVQYNPENSK.D<br>R.QSHNIEQNYINDLDTLFTVTGSDSNWLTQ.K<br>K.FDNLVGFYGFYANFSSR.T<br>R.RGTLPPYGPDTLDNYEFGWK.T<br>R.EENLQDVLTAITAGNER.L<br>R.WIQALITIEGK.L<br>R.GVASEGANHSHASLPTVGTYLDDEMPITTIQGALDIHAYDLAR.V<br>R.TYPTSDITQDNAAALVEKYNVDVDTYGAR.L<br>R.LALGIDLDDWTIRPTLMGQVQK.T<br>R.VASPADAR.I<br>R.IANDSFDCTLPGSDGADNALLAPK.G<br>K.TNGSFAQER.S<br>R.GEIDLGYR.R<br>R.GFRPGGINR.R<br>K.GTSLPVTPK.F<br>K.LPNWLYAPLIR.L<br>R.LKEDPTDVAAIR.M<br>R.GLDAEFGLEIWFWSLANLK.T<br>R.VIHEALLSPETEVR.A<br>R.IGGYDEAIALYALVER.F<br>R.YAEAVETLDAVLTDDPNPAHANLK.A<br>R.ALELAPFGGAAR.A<br>R.AILAAVPASAAHR.I<br>R.LSDMGAYR.D<br>K.AYDDAGAPDAFR.H<br>R.LMAHLDAVQGR.V<br>R.DGEAADAALAAVGAHVDEAMIAALALAENR.L<br>R.AGGQDPSGDPVFLGMRA<br>K.SEVETVADYIR.A<br>R.ANQPILPEAER.G<br>R.DAAMALAAAR.Q<br>R.AGVTDGSADATANEALFQR.E<br>K.APAAPDLPLFAGDAAIPLTKPTPK.T<br>R.GEPLVRPEAIK.A<br>R.RASEFASR.T<br>K.ASSESRESIGDAATR.L<br>R.RGAEAFADWTIGGER.A<br>R.GAIAAAER.A<br>R.EEPAPPPSGLQLLAR.E<br>K.YDAFHAMFAASSLDR.G<br>K.AGTASLWNLQR.R<br>R.VQESTADAAGAQYLSK.A<br>R.VIGKQDDQAYGR.T<br>R.SQPLAATLGHALIAIEEPHYAEAEK.V<br>R.DAETALFQDMMDFLLVAAGLQPGQVR.V<br>K.TAVALDNQNPFWYQLGIVYANK.G<br>R.ARDESDDGEGR.K<br>R.TASSAGLALR.L<br>R.ASQEATFLLNEK.R<br>R.VEPSLQAAFVEYGGNR.H<br>R.RSDEEDGESR.M<br>K.AALAAEAAEAAEAPVTDAPAEAEAPAPK.K<br>R.YGVEDQLAGMLNPVQLK.S<br>R.EEAHAAAAAQR.A<br>R.HGFLAFSEIHPDYQIPK.E<br>K.GAALTYLSLAGR.Y<br>K.AVAEATSEATQSAEPVAADAGETGEAADGEPFR.R<br>R.LIEEEAAR.G<br>R.EHNNIEQALSTLNLEAAEAIAR.Q<br>R.SFAPIEPIEDDEDIPEEEDDESDASDRAPAR.A<br>R.EALLREAEHAAAAAQR.A<br>K.KAVAAEATSEATQSAEPVAADAGETGEAADGEPFR.R<br>K.GNRIEEDFESAEHK.Q<br>R.MAIEVGGPPPTQR.R<br>K.QYADPVSLYQR.Y<br>R.VKQYADPVSLYQR.Y<br>R.IEEDFESAEHK.Q<br>K.TLASSAPALHSDSLIK.R<br>R.SFAPIEPIEDDEDIPEEEDDESDASDR.A<br>R.SDEEDGESR.M<br>R.ELHEIEELYVSVLELDPGETEGAR.M<br>R.DIYHKDIEEVLVEGDEGYK.A<br>R.DESDIDGEGR.K<br>K.DIEEVLVEGDEGYK.A<br>R.QVMLVQVKEER.G<br>R.DEEGTEGADAPSAVDDVQETAGDAEAASTTDEAPGTDAEAEPAAK.K<br>K.TLASSAPALHSDSLIKR.A<br>R.HREETR.V<br>K.VTRVPSLQAAFVEYGGNR.H<br>K.SGYLVINPTIEALVSDINSGR.S<br>R.TGVLASTRPECHCEGLVLR.T<br>R.HGFLAFSEIHPDYQIPKEDR.E<br>R.DMAGLVIDFIDMDHGSNVR.K<br>R.DFDYLAR.L<br>R.AIRDYHK.D<br>K.EALKNDR.A<br>K.AVAEATSEATQSAEPVAADAGETGEAADGEPFR.R<br>R.LPFLTFLQR.L<br>R.AVGLTLEEVGWIR.R<br>R.AAIARQSEDELAALIR.G<br>R.TGVASAEAAVALAQITIDALPGLAWR.G<br>R.TDYLQGVTAALADAGFAPPVITGSGTGTHR.I<br>R.LVVIDIDPGLAR.T<br>R.LASSFIGIDYDNWR.I<br>R.PVGASTITQVAK.N<br>R.DGEGKPVHSYAR.E |
| YP_618202 | Sala_3166 | FAD dependent oxidoreductase      | 15.21%            | 6                       |                                                                                                                                                                                                                                                                                                                                                                                                                                                                                                                                                                                                                                                                                                                                                                                                                                                                                                                                                                                                                                                                                                                                                                                                                                                                                                                                                                                                                                                                                                                                                                                                                                                                                                                                                                                                                                                                                                                                                                                                                                                                                                                                                                                                                                                                                                                                                                                                                                                                                                                                                                                                                                                                                                                                                                                                                                                                                                                                                                                                                                                                                                                                                                                                                                                                                                                                                                                                                                           |
| YP_618204 | Sala_3168 | TonB-dependent receptor           | 52.08%            | 27                      |                                                                                                                                                                                                                                                                                                                                                                                                                                                                                                                                                                                                                                                                                                                                                                                                                                                                                                                                                                                                                                                                                                                                                                                                                                                                                                                                                                                                                                                                                                                                                                                                                                                                                                                                                                                                                                                                                                                                                                                                                                                                                                                                                                                                                                                                                                                                                                                                                                                                                                                                                                                                                                                                                                                                                                                                                                                                                                                                                                                                                                                                                                                                                                                                                                                                                                                                                                                                                                           |
| YP_618205 | Sala_3169 | Tetratricopeptide TPR_2           | 34.77%            | 13                      |                                                                                                                                                                                                                                                                                                                                                                                                                                                                                                                                                                                                                                                                                                                                                                                                                                                                                                                                                                                                                                                                                                                                                                                                                                                                                                                                                                                                                                                                                                                                                                                                                                                                                                                                                                                                                                                                                                                                                                                                                                                                                                                                                                                                                                                                                                                                                                                                                                                                                                                                                                                                                                                                                                                                                                                                                                                                                                                                                                                                                                                                                                                                                                                                                                                                                                                                                                                                                                           |
| YP_618206 | Sala_3170 | DSBA oxidoreductase               | 34.58%            | 13                      |                                                                                                                                                                                                                                                                                                                                                                                                                                                                                                                                                                                                                                                                                                                                                                                                                                                                                                                                                                                                                                                                                                                                                                                                                                                                                                                                                                                                                                                                                                                                                                                                                                                                                                                                                                                                                                                                                                                                                                                                                                                                                                                                                                                                                                                                                                                                                                                                                                                                                                                                                                                                                                                                                                                                                                                                                                                                                                                                                                                                                                                                                                                                                                                                                                                                                                                                                                                                                                           |
| YP_618207 | Sala_3171 | peptidase M48, Ste24p             | 22.70%            | 5                       |                                                                                                                                                                                                                                                                                                                                                                                                                                                                                                                                                                                                                                                                                                                                                                                                                                                                                                                                                                                                                                                                                                                                                                                                                                                                                                                                                                                                                                                                                                                                                                                                                                                                                                                                                                                                                                                                                                                                                                                                                                                                                                                                                                                                                                                                                                                                                                                                                                                                                                                                                                                                                                                                                                                                                                                                                                                                                                                                                                                                                                                                                                                                                                                                                                                                                                                                                                                                                                           |
| YP_618208 | Sala_3172 | ribonuclease, Rne/Rng family      | 63.00%            | 41                      |                                                                                                                                                                                                                                                                                                                                                                                                                                                                                                                                                                                                                                                                                                                                                                                                                                                                                                                                                                                                                                                                                                                                                                                                                                                                                                                                                                                                                                                                                                                                                                                                                                                                                                                                                                                                                                                                                                                                                                                                                                                                                                                                                                                                                                                                                                                                                                                                                                                                                                                                                                                                                                                                                                                                                                                                                                                                                                                                                                                                                                                                                                                                                                                                                                                                                                                                                                                                                                           |
| YP_618210 | Sala_3174 | FAD-linked oxidoreductase         | 10.07%            | 3                       |                                                                                                                                                                                                                                                                                                                                                                                                                                                                                                                                                                                                                                                                                                                                                                                                                                                                                                                                                                                                                                                                                                                                                                                                                                                                                                                                                                                                                                                                                                                                                                                                                                                                                                                                                                                                                                                                                                                                                                                                                                                                                                                                                                                                                                                                                                                                                                                                                                                                                                                                                                                                                                                                                                                                                                                                                                                                                                                                                                                                                                                                                                                                                                                                                                                                                                                                                                                                                                           |
| YP_618211 | Sala_3175 | threonine aldolase family protein | 17.85%            | 3                       |                                                                                                                                                                                                                                                                                                                                                                                                                                                                                                                                                                                                                                                                                                                                                                                                                                                                                                                                                                                                                                                                                                                                                                                                                                                                                                                                                                                                                                                                                                                                                                                                                                                                                                                                                                                                                                                                                                                                                                                                                                                                                                                                                                                                                                                                                                                                                                                                                                                                                                                                                                                                                                                                                                                                                                                                                                                                                                                                                                                                                                                                                                                                                                                                                                                                                                                                                                                                                                           |
| YP_618212 | Sala_3176 | glycosyl transferase, family 51   | 31.62%            | 18                      |                                                                                                                                                                                                                                                                                                                                                                                                                                                                                                                                                                                                                                                                                                                                                                                                                                                                                                                                                                                                                                                                                                                                                                                                                                                                                                                                                                                                                                                                                                                                                                                                                                                                                                                                                                                                                                                                                                                                                                                                                                                                                                                                                                                                                                                                                                                                                                                                                                                                                                                                                                                                                                                                                                                                                                                                                                                                                                                                                                                                                                                                                                                                                                                                                                                                                                                                                                                                                                           |

| Accession | Locus tag | Description                                                                 | Sequence coverage | No. peptides identified | List of peptides identified                                                                                                                                                                                                                                                                                                                                                                                                                                                                                                                                                                                                                                                                                                                                                                                                                                                                                                                                                                                                                                                                                                                                                                                                                                                                                                                                                                                                                                                                                                                                                                                                                                                                                                                                                                                                                                                                                                                                                                                                                                |
|-----------|-----------|-----------------------------------------------------------------------------|-------------------|-------------------------|------------------------------------------------------------------------------------------------------------------------------------------------------------------------------------------------------------------------------------------------------------------------------------------------------------------------------------------------------------------------------------------------------------------------------------------------------------------------------------------------------------------------------------------------------------------------------------------------------------------------------------------------------------------------------------------------------------------------------------------------------------------------------------------------------------------------------------------------------------------------------------------------------------------------------------------------------------------------------------------------------------------------------------------------------------------------------------------------------------------------------------------------------------------------------------------------------------------------------------------------------------------------------------------------------------------------------------------------------------------------------------------------------------------------------------------------------------------------------------------------------------------------------------------------------------------------------------------------------------------------------------------------------------------------------------------------------------------------------------------------------------------------------------------------------------------------------------------------------------------------------------------------------------------------------------------------------------------------------------------------------------------------------------------------------------|
| YP_618213 | Sala_3177 | peptide chain release factor 2                                              | 65.07%            | 20                      | K.TGGSFASLRPGDLIAVK.S<br>R.VQLDYSEYPLLV.R.A<br>R.LRDLGVPLFGK.T<br>R.AYFDKVDDELALHEMAFLALPK.A<br>R.SFGVQAASR.A<br>R.RSDSEFLDR.G<br>R.NFGNSGGSGEHTMR.W<br>R.IEDALTKEQILELYLNEIPLGR.R<br>R.SDSEFLDRGGII.<br>R.QDAPVQQTGR.R<br>R.LASSFIGIDYDNWRIAASVLSK.S<br>R.IYAMQGGFDV.R.L<br>R.IAAVLSKSGAARIGFADGDTGLPASAATMYR.K<br>K.STGGSYALR.N<br>K.DFALEALADRQPIPAAPK.G<br>R.LTHPTGIVASQNDR.S<br>R.EAAASGEYQAK.T<br>R.TGVTSTAPGVDLDGALDFMAAALSQK.V<br>R.SYVLQPYQLVK.D<br>K.VTGEKVEVEDID.<br>K.VEDEPTLWDPK.A<br>R.AEALDHDKITAALALLR.R<br>R.RLDELNAK.V<br>R.RLDEAITATR.A<br>K.VELIEYQAGEQAGIK.S<br>K.TEIGWGHQIR.S<br>K.GENAYGAK.T<br>R.LDEAITATR.A<br>R.HTSFSVWVYVYDDNIEIEINEGDLK.I<br>R.GMKVELIEYQAGEQAGIK.S<br>K.ALLAGEADGNDAYIEVHAGAGGESQDWAEMLQR.M<br>R.TGVTSTAPGVDLDGALDFMAAALSQKVTGEK.V<br>R.RLDEAITATR.A<br>R.LYEAELQKR.E<br>R.LDELNAKVEDEPTLWDPK.A<br>R.VLAQDIPIEVIER.L<br>R.EGGQVIVVDGDRPIAQHTGTPFR.L<br>K.LVSYDDKQHAGGYLAR.F<br>R.FVPEGDRPAPDAIK.V<br>R.LFLQGDAAALLR.A<br>R.APAGAGDAR.R<br>R.ALSGWGTPLVGR.L<br>R.INPHVEAIAVAER.L<br>K.AMVAADAAWR.I<br>R.GAGGFGSTGIESDAADETANAAGLASLSGK.L<br>K.VILANLGDENFEVK.R<br>R.ATFAEVRDLDDTAR.G<br>R.HAVATGFAMAIPLGVEYQVRP.R.S<br>R.RPPLLIQFAAETNDVIAHAEAK.L<br>R.VPPLLAENPDILASVAQSSR.R<br>R.ILITAGPTHEPIDPVR.Y<br>R.AGEQVTVPLTLAALSENK.V<br>R.AAESQAQK.I<br>K.IADELDQR.A<br>R.MAAGIADDLATTLLATDKPVLAAAPAMNVR.M<br>K.QGFAIAAAAEAGAEVLLIAGPVLPTPPGVIR.V<br>R.VVVPLMPVAEVEPIPR.L<br>R.YDVYPGAPGR.G<br>K.LGQTLATRPDLWGEEAR.N<br>R.IPDYAAAFQAIQPAAVK.L<br>K.LAANLVHAF.LR.Q<br>R.NLLTQDALPPVAFAR.I<br>R.VAEIHFEAQVVPDYNHNVDEFATALR.A<br>R.TLALIPDIIR.R<br>R.DIETYEWAHLEALGGEASR.L<br>K.EWIRDDELGPEALADGLR.E<br>R.YAL.SALIGAAAGAAALNWL.G<br>R.IREEIEATFEAPLESYSEFDPPVGSASIAQVHR.A<br>R.GKPVSELSVGQMLDGLFAITR.D<br>R.EAASASELSDAMAIEPEYVPAIDWDR.T<br>K.GAAPAPPPLPDVTLMWER.G<br>K.ADSTIAAVDFGIMGR.I<br>R.NVTDIIPAALSEHR.V<br>K.LIAGDEESYR.Y<br>R.GIDSLVWSEQNAEK.L<br>R.AGEAILDMAGGTGDIAFR.M<br>R.FFDAYTIAFGIR.N<br>K.VEPILGSLVAIHSGWK.A<br>K.TAMVGEVFSR.V<br>K.LTFPDRFFDAYTIAFGIR.N<br>K.VEAAVAAGDKDAAATALK.A<br>K.KVEAAVAAGDK.D |
| YP_618214 | Sala_3178 | Methyltransferase type 11                                                   | 27.20%            | 4                       | R.LDELNAKVEDEPTLWDPK.A<br>R.VLAQDIPIEVIER.L<br>R.EGGQVIVVDGDRPIAQHTGTPFR.L<br>K.LVSYDDKQHAGGYLAR.F<br>R.FVPEGDRPAPDAIK.V                                                                                                                                                                                                                                                                                                                                                                                                                                                                                                                                                                                                                                                                                                                                                                                                                                                                                                                                                                                                                                                                                                                                                                                                                                                                                                                                                                                                                                                                                                                                                                                                                                                                                                                                                                                                                                                                                                                                   |
| YP_618215 | Sala_3179 | hypothetical protein                                                        | 19.01%            | 2                       | R.LFLQGDAAALLR.A<br>R.APAGAGDAR.R                                                                                                                                                                                                                                                                                                                                                                                                                                                                                                                                                                                                                                                                                                                                                                                                                                                                                                                                                                                                                                                                                                                                                                                                                                                                                                                                                                                                                                                                                                                                                                                                                                                                                                                                                                                                                                                                                                                                                                                                                          |
| YP_618216 | Sala_3180 | UBA/THIF-type NAD/FAD binding fold                                          | 14.06%            | 3                       | R.ALSGWGTPLVGR.L<br>R.INPHVEAIAVAER.L<br>K.AMVAADAAWR.I                                                                                                                                                                                                                                                                                                                                                                                                                                                                                                                                                                                                                                                                                                                                                                                                                                                                                                                                                                                                                                                                                                                                                                                                                                                                                                                                                                                                                                                                                                                                                                                                                                                                                                                                                                                                                                                                                                                                                                                                    |
| YP_618217 | Sala_3181 | deoxyuridine 5'-triphosphate nucleotidohydrolase (dut)                      | 47.09%            | 4                       | R.GAGGFGSTGIESDAADETANAAGLASLSGK.L<br>K.VILANLGDENFEVK.R<br>R.ATFAEVRDLDDTAR.G<br>R.HAVATGFAMAIPLGVEYQVRP.R.S<br>R.RPPLLIQFAAETNDVIAHAEAK.L<br>R.VPPLLAENPDILASVAQSSR.R<br>R.ILITAGPTHEPIDPVR.Y<br>R.AGEQVTVPLTLAALSENK.V<br>R.AAESQAQK.I<br>K.IADELDQR.A<br>R.MAAGIADDLATTLLATDKPVLAAAPAMNVR.M<br>K.QGFAIAAAAEAGAEVLLIAGPVLPTPPGVIR.V<br>R.VVVPLMPVAEVEPIPR.L<br>R.YDVYPGAPGR.G<br>K.LGQTLATRPDLWGEEAR.N<br>R.IPDYAAAFQAIQPAAVK.L<br>K.LAANLVHAF.LR.Q<br>R.NLLTQDALPPVAFAR.I<br>R.VAEIHFEAQVVPDYNHNVDEFATALR.A<br>R.TLALIPDIIR.R<br>R.DIETYEWAHLEALGGEASR.L<br>K.EWIRDDELGPEALADGLR.E<br>R.YAL.SALIGAAAGAAALNWL.G<br>R.IREEIEATFEAPLESYSEFDPPVGSASIAQVHR.A<br>R.GKPVSELSVGQMLDGLFAITR.D<br>R.EAASASELSDAMAIEPEYVPAIDWDR.T<br>K.GAAPAPPPLPDVTLMWER.G<br>K.ADSTIAAVDFGIMGR.I<br>R.NVTDIIPAALSEHR.V<br>K.LIAGDEESYR.Y<br>R.GIDSLVWSEQNAEK.L<br>R.AGEAILDMAGGTGDIAFR.M<br>R.FFDAYTIAFGIR.N<br>K.VEPILGSLVAIHSGWK.A<br>K.TAMVGEVFSR.V<br>K.LTFPDRFFDAYTIAFGIR.N<br>K.VEAAVAAGDKDAAATALK.A<br>K.KVEAAVAAGDK.D                                                                                                                                                                                                                                                                                                                                                                                                                                                                                                                                                                                                                                                                                                                                                                                                                                                                                                                                                                                                                                                   |
| YP_618218 | Sala_3182 | phosphopantothencysteine decarboxylase/phosphopantothenate--cysteine ligase | 37.14%            | 8                       | R.HAVATGFAMAIPLGVEYQVRP.R.S<br>R.RPPLLIQFAAETNDVIAHAEAK.L<br>R.VPPLLAENPDILASVAQSSR.R<br>R.ILITAGPTHEPIDPVR.Y<br>R.AGEQVTVPLTLAALSENK.V<br>R.AAESQAQK.I<br>K.IADELDQR.A<br>R.MAAGIADDLATTLLATDKPVLAAAPAMNVR.M<br>K.QGFAIAAAAEAGAEVLLIAGPVLPTPPGVIR.V<br>R.VVVPLMPVAEVEPIPR.L<br>R.YDVYPGAPGR.G<br>K.LGQTLATRPDLWGEEAR.N<br>R.IPDYAAAFQAIQPAAVK.L<br>K.LAANLVHAF.LR.Q<br>R.NLLTQDALPPVAFAR.I<br>R.VAEIHFEAQVVPDYNHNVDEFATALR.A<br>R.TLALIPDIIR.R<br>R.DIETYEWAHLEALGGEASR.L<br>K.EWIRDDELGPEALADGLR.E<br>R.YAL.SALIGAAAGAAALNWL.G<br>R.IREEIEATFEAPLESYSEFDPPVGSASIAQVHR.A<br>R.GKPVSELSVGQMLDGLFAITR.D<br>R.EAASASELSDAMAIEPEYVPAIDWDR.T<br>K.GAAPAPPPLPDVTLMWER.G<br>K.ADSTIAAVDFGIMGR.I<br>R.NVTDIIPAALSEHR.V<br>K.LIAGDEESYR.Y<br>R.GIDSLVWSEQNAEK.L<br>R.AGEAILDMAGGTGDIAFR.M<br>R.FFDAYTIAFGIR.N<br>K.VEPILGSLVAIHSGWK.A<br>K.TAMVGEVFSR.V<br>K.LTFPDRFFDAYTIAFGIR.N<br>K.VEAAVAAGDKDAAATALK.A<br>K.KVEAAVAAGDK.D                                                                                                                                                                                                                                                                                                                                                                                                                                                                                                                                                                                                                                                                                                                                                                                                                                                                                                                                                                                                                                                                                                                                     |
| YP_618219 | Sala_3183 | putative CcdB-like protein                                                  | 26.53%            | 2                       | R.LFLQGDAAALLR.A<br>R.APAGAGDAR.R                                                                                                                                                                                                                                                                                                                                                                                                                                                                                                                                                                                                                                                                                                                                                                                                                                                                                                                                                                                                                                                                                                                                                                                                                                                                                                                                                                                                                                                                                                                                                                                                                                                                                                                                                                                                                                                                                                                                                                                                                          |
| YP_618221 | Sala_3185 | 2-polyprenylphenol 6-hydroxylase                                            | 52.92%            | 14                      | R.LFLQGDAAALLR.A<br>R.APAGAGDAR.R<br>R.ALSGWGTPLVGR.L<br>R.INPHVEAIAVAER.L<br>K.AMVAADAAWR.I<br>R.GAGGFGSTGIESDAADETANAAGLASLSGK.L<br>K.VILANLGDENFEVK.R<br>R.ATFAEVRDLDDTAR.G<br>R.HAVATGFAMAIPLGVEYQVRP.R.S<br>R.RPPLLIQFAAETNDVIAHAEAK.L<br>R.VPPLLAENPDILASVAQSSR.R<br>R.ILITAGPTHEPIDPVR.Y<br>R.AGEQVTVPLTLAALSENK.V<br>R.AAESQAQK.I<br>K.IADELDQR.A<br>R.MAAGIADDLATTLLATDKPVLAAAPAMNVR.M<br>K.QGFAIAAAAEAGAEVLLIAGPVLPTPPGVIR.V<br>R.VVVPLMPVAEVEPIPR.L<br>R.YDVYPGAPGR.G<br>K.LGQTLATRPDLWGEEAR.N<br>R.IPDYAAAFQAIQPAAVK.L<br>K.LAANLVHAF.LR.Q<br>R.NLLTQDALPPVAFAR.I<br>R.VAEIHFEAQVVPDYNHNVDEFATALR.A<br>R.TLALIPDIIR.R<br>R.DIETYEWAHLEALGGEASR.L<br>K.EWIRDDELGPEALADGLR.E<br>R.YAL.SALIGAAAGAAALNWL.G<br>R.IREEIEATFEAPLESYSEFDPPVGSASIAQVHR.A<br>R.GKPVSELSVGQMLDGLFAITR.D<br>R.EAASASELSDAMAIEPEYVPAIDWDR.T<br>K.GAAPAPPPLPDVTLMWER.G<br>K.ADSTIAAVDFGIMGR.I<br>R.NVTDIIPAALSEHR.V<br>K.LIAGDEESYR.Y<br>R.GIDSLVWSEQNAEK.L<br>R.AGEAILDMAGGTGDIAFR.M<br>R.FFDAYTIAFGIR.N<br>K.VEPILGSLVAIHSGWK.A<br>K.TAMVGEVFSR.V<br>K.LTFPDRFFDAYTIAFGIR.N<br>K.VEAAVAAGDKDAAATALK.A<br>K.KVEAAVAAGDK.D                                                                                                                                                                                                                                                                                                                                                                                                                                                                                                                                                                                                                                                                                                                                                                                                                                                                                                                                                   |
| YP_618222 | Sala_3186 | ubiquinone/menaquinone biosynthesis methyltransferases                      | 39.22%            | 8                       | R.HAVATGFAMAIPLGVEYQVRP.R.S<br>R.RPPLLIQFAAETNDVIAHAEAK.L<br>R.VPPLLAENPDILASVAQSSR.R<br>R.ILITAGPTHEPIDPVR.Y<br>R.AGEQVTVPLTLAALSENK.V<br>R.AAESQAQK.I<br>K.IADELDQR.A<br>R.MAAGIADDLATTLLATDKPVLAAAPAMNVR.M<br>K.QGFAIAAAAEAGAEVLLIAGPVLPTPPGVIR.V<br>R.VVVPLMPVAEVEPIPR.L<br>R.YDVYPGAPGR.G<br>K.LGQTLATRPDLWGEEAR.N<br>R.IPDYAAAFQAIQPAAVK.L<br>K.LAANLVHAF.LR.Q<br>R.NLLTQDALPPVAFAR.I<br>R.VAEIHFEAQVVPDYNHNVDEFATALR.A<br>R.TLALIPDIIR.R<br>R.DIETYEWAHLEALGGEASR.L<br>K.EWIRDDELGPEALADGLR.E<br>R.YAL.SALIGAAAGAAALNWL.G<br>R.IREEIEATFEAPLESYSEFDPPVGSASIAQVHR.A<br>R.GKPVSELSVGQMLDGLFAITR.D<br>R.EAASASELSDAMAIEPEYVPAIDWDR.T<br>K.GAAPAPPPLPDVTLMWER.G<br>K.ADSTIAAVDFGIMGR.I<br>R.NVTDIIPAALSEHR.V<br>K.LIAGDEESYR.Y<br>R.GIDSLVWSEQNAEK.L<br>R.AGEAILDMAGGTGDIAFR.M<br>R.FFDAYTIAFGIR.N<br>K.VEPILGSLVAIHSGWK.A<br>K.TAMVGEVFSR.V<br>K.LTFPDRFFDAYTIAFGIR.N<br>K.VEAAVAAGDKDAAATALK.A<br>K.KVEAAVAAGDK.D                                                                                                                                                                                                                                                                                                                                                                                                                                                                                                                                                                                                                                                                                                                                                                                                                                                                                                                                                                                                                                                                                                                                     |
| YP_618224 | Sala_3188 | ribosomal protein S20                                                       | 33.33%            | 2                       | R.LFLQGDAAALLR.A<br>R.APAGAGDAR.R                                                                                                                                                                                                                                                                                                                                                                                                                                                                                                                                                                                                                                                                                                                                                                                                                                                                                                                                                                                                                                                                                                                                                                                                                                                                                                                                                                                                                                                                                                                                                                                                                                                                                                                                                                                                                                                                                                                                                                                                                          |

**Supplemental Table SIV. Quantified proteins from all 10°C vs 30°C metabolic labeling experiments (A-F)**

1172 proteins were quantified using RelEx (v 0.92) and are shown below.

The quantitation parameters used were: 4 scans before; 4 scans after; 0.15 threshold factor; apply Savitzky-Golay filter with 7 points; apply 5/N filter at 5; apply regression filter with 0.8 minimum correlation at 1, 0.7 minimum correlation at 10; 99% incorporation of 15N. Only proteins with two or more peptides were considered for quantitation.

The following is shown for each quantified protein: locus tag; RefSeq accession number; protein description; averaged <sup>15</sup>N:<sup>14</sup>N fold change ratio (log2FC); the number of experiments in which the protein was quantified (N). Three statistical tests were performed: the Student's t-test, the Student's t-test accounting for replicate correlation and buffers using linear modeling, and an empirical Bayes moderated t-test. For each of the statistical tests, the *t*-value, *p*-value adjusted for multiple testing (*p*-value), Bonferroni adjusted *p*-value (*p*-value(BON)), Storey-Tibshirani FDR adjusted *q*-value (*q*-value(ST)) (where these exist) for each protein are shown.

The experimental averaged <sup>15</sup>N:<sup>14</sup>N ratio (where these exist across experiments A-F); mean across all experiments; and standard deviation for each experiment is also shown

| Locus Tag | Accession | Description                                                  | log2FC | N  | Student's t-test |         |              |             | Unmoderated t-test |         |              |             | Empirical Bayes moderated t-test |         |              |             | Experiment |        |        |        |        |        |        |        |        |        |        |        | mean   | stdev  |        |        |        |        |        |        |        |       |       |
|-----------|-----------|--------------------------------------------------------------|--------|----|------------------|---------|--------------|-------------|--------------------|---------|--------------|-------------|----------------------------------|---------|--------------|-------------|------------|--------|--------|--------|--------|--------|--------|--------|--------|--------|--------|--------|--------|--------|--------|--------|--------|--------|--------|--------|--------|-------|-------|
|           |           |                                                              |        |    | T-value          | p-value | p-value(BON) | q-value(ST) | T-value            | p-value | p-value(BON) | q-value(ST) | T-value                          | p-value | p-value(BON) | q-value(ST) |            |        |        |        |        |        |        |        |        |        |        |        |        |        |        |        |        |        |        |        |        |       |       |
|           |           |                                                              |        |    |                  |         |              |             |                    |         |              |             |                                  |         |              |             | A1_1       | A1_2   | A2_1   | A2_2   | B1_1   | B1_2   | B2_1   | B2_2   | C1_1   | C1_2   | C2_1   | C2_2   |        |        | D1_1   | D1_2   | D2_1   | D2_2   | E_1    | E_2    | F_1    | F_2   |       |
| Saa1_2718 | YP_017756 | Aspartate-semialdehyde dehydrogenase, USG-1 related          | 1.323  | 19 | 13.005           | 0.000   | 0.000        | 0.000       | 8.257              | 0.000   | 0.000        | 0.000       | 8.257                            | 0.000   | 0.000        | 0.000       | 1.110      | 1.659  | 1.832  | 1.640  | 1.628  | 1.249  | 1.223  | 0.993  | 0.327  | 0.999  | 0.938  | 0.925  | 1.010  | 1.188  | 1.108  | 1.472  | 1.423  | 1.764  | 1.908  | 1.283  | 0.423  |       |       |
| Saa1_0588 | YP_015842 | bacterioferritin                                             | 2.076  | 13 | 10.281           | 0.000   | 0.000        | 0.000       | 8.879              | 0.000   | 0.004        | 0.000       | 9.160                            | 0.000   | 0.000        | 0.000       | 2.862      | 3.220  | 2.746  | 2.670  | 1.663  | 1.751  | 1.361  | 1.581  | 1.497  | 1.497  | 1.974  | 1.091  | 1.402  |        |        |        |        |        |        |        | 2.907  | 0.722 |       |
| Saa1_1951 | YP_016996 | cytochrome b5, mitochondrial                                 | 0.984  | 20 | 13.012           | 0.000   | 0.000        | 0.000       | 7.136              | 0.000   | 0.004        | 0.000       | 6.540                            | 0.000   | 0.001        | 0.000       | 1.197      | 1.892  | 1.221  | 1.357  | 1.214  | 1.152  | 0.854  | 0.835  | 0.793  | 0.847  | 1.251  | 1.287  | 0.553  | 1.219  | 1.202  | 1.221  | 0.314  | 0.126  | 1.466  | 1.298  | 1.025  | 0.362 |       |
| Saa1_1919 | YP_016396 | glyceralddehyde-3-phosphate dehydrogenase, type I            | -1.025 | 20 | -10.950          | 0.000   | 0.000        | 0.000       | -6.808             | 0.000   | 0.007        | 0.001       | -6.410                           | 0.000   | 0.002        | 0.000       | -0.460     | -0.296 | -0.914 | -0.929 | -1.125 | -0.940 | -1.564 | -0.896 | -0.755 | -0.865 | -0.882 | -0.286 | -1.544 | -1.228 | -0.830 | -1.359 | -1.201 | -1.200 | -1.299 | -1.553 | -0.961 | 0.401 |       |
| Saa1_3101 | YP_018138 | OmpAMeB                                                      | 1.244  | 20 | 11.290           | 0.000   | 0.000        | 0.000       | 6.163              | 0.000   | 0.020        | 0.001       | 6.278                            | 0.000   | 0.002        | 0.000       | 0.857      | 1.980  | 1.883  | 1.917  | 1.754  | 1.474  | 1.624  | 1.844  | 0.956  | 1.218  | 1.481  | 1.402  | 1.555  | 1.137  | 0.744  | 1.043  | 1.094  | 1.145  | 0.488  | 0.604  | 1.308  | 0.518 |       |
| Saa1_0801 | YP_015854 | two component transcriptional regulator, winged helix family | 0.789  | 20 | 16.391           | 0.000   | 0.000        | 0.000       | 7.922              | 0.000   | 0.001        | 0.000       | 6.168                            | 0.000   | 0.003        | 0.000       | 0.623      | 0.786  | 0.756  | 0.649  | 0.717  | 0.703  | 0.971  | 0.502  | 0.559  | 0.633  | 0.860  | 0.959  | 0.712  | 0.789  | 1.082  | 0.718  | 1.097  | 1.037  | 0.422  | 0.474  | 0.770  | 0.210 |       |
| Saa1_0100 | YP_015158 | hypothetical protein                                         | 1.303  | 13 | 6.054            | 0.000   | 0.055        | 0.001       | 5.977              | 0.000   | 0.275        | 0.010       | 6.194                            | 0.000   | 0.012        | 0.001       | 1.210      | 1.752  |        |        |        |        |        |        |        |        |        |        |        |        |        |        |        |        |        |        |        | 1.411 | 0.679 |
| Saa1_0504 | YP_015558 | Phasin                                                       | 1.288  | 19 | 11.155           | 0.000   | 0.000        | 0.000       | 5.180              | 0.000   | 0.147        | 0.006       | 5.491                            | 0.000   | 0.017        | 0.002       | 1.831      | 0.629  | 1.288  | 1.370  | 1.360  | 1.659  | 1.033  | 1.368  | 1.105  | 1.057  | 1.744  | 2.241  | 1.789  | 1.357  | 1.095  | 0.836  | 0.783  | 1.756  | 1.630  | 1.296  | 0.507  |       |       |
| Saa1_0617 | YP_015871 | phosphoserine aminotransferase                               | -0.862 | 17 | -11.402          | 0.000   | 0.000        | 0.000       | -5.889             | 0.000   | 0.117        | 0.005       | -5.299                           | 0.000   | 0.036        | 0.002       | -0.933     | -1.151 | -1.293 | -0.802 | -1.194 | -0.437 | -0.993 | -0.608 | -0.783 | -0.700 | -1.104 | -0.868 | -1.146 | -1.094 | -1.194 | -0.675 | -0.579 | -0.856 | 0.310  |        |        |       |       |
| Saa1_1229 | YP_016277 | polyhydroxyalkoate synthase repressor, PhaR                  | 1.298  | 11 | 6.757            | 0.000   | 0.048        | 0.000       | 5.972              | 0.002   | 1.000        | 0.029       | 6.007                            | 0.000   | 0.030        | 0.002       |            |        |        |        |        |        |        |        |        |        |        |        |        |        |        |        |        |        |        |        |        |       |       |
| Saa1_1913 | YP_016958 | TonB-dependent receptor                                      | 0.706  | 20 | 8.195            | 0.000   | 0.000        | 0.000       | 6.017              | 0.000   | 0.026        | 0.002       | 5.146                            | 0.000   | 0.035        | 0.002       | 0.915      | 1.544  | 1.099  | 0.827  | 0.700  | 0.673  | 0.469  | 0.761  | 0.387  | 0.646  | 0.436  | 0.384  | 0.054  | 0.205  | 0.155  | 0.431  | 1.038  | 0.959  | 0.796  | 0.916  | 1.651  | 0.861 | 0.366 |
| Saa1_2845 | YP_017883 | transcription termination factor Rho                         | 0.778  | 20 | 6.963            | 0.000   | 0.001        | 0.000       | 5.247              | 0.000   | 0.103        | 0.003       | 4.922                            | 0.000   | 0.062        | 0.004       | 0.590      | 0.913  | 1.114  | 0.498  | 0.434  | 0.697  | 0.423  | 0.558  | 0.481  | 0.679  | 0.777  | 1.046  | 0.580  | 0.117  | 0.539  | 0.610  | 1.001  | 0.966  | 1.617  | 1.855  | 0.689  | 0.442 |       |
| Saa1_2255 | YP_017297 | Aksoxyacyl-CoA reductase                                     | -0.999 | 20 | -13.362          | 0.000   | 0.000        | 0.000       | -5.685             | 0.000   | 0.047        | 0.003       | -4.621                           | 0.000   | 0.131        | 0.007       |            |        |        |        |        |        |        |        |        |        |        |        |        |        |        |        |        |        |        |        |        |       |       |
| Saa1_1229 | YP_016277 | polyhydroxyalkoate synthase repressor, PhaR                  | 1.298  | 11 | 6.757            | 0.000   | 0.048        | 0.000       | 5.972              | 0.002   | 1.000        | 0.029       | 6.007                            | 0.000   | 0.030        | 0.002       |            |        |        |        |        |        |        |        |        |        |        |        |        |        |        |        |        |        |        |        |        |       |       |
| Saa1_1913 | YP_016958 | TonB-dependent receptor                                      | 0.706  | 20 | 8.195            | 0.000   | 0.000        | 0.000       | 6.017              | 0.000   | 0.026        | 0.002       | 5.146                            | 0.000   | 0.035        | 0.002       | 0.915      | 1.544  | 1.099  | 0.827  | 0.700  | 0.673  | 0.469  | 0.761  | 0.387  | 0.646  | 0.436  | 0.384  | 0.054  | 0.205  | 0.155  | 0.431  | 1.038  | 0.959  | 0.796  | 0.916  | 1.651  | 0.861 | 0.366 |
| Saa1_2845 | YP_017883 | transcription termination factor Rho                         | 0.778  | 20 | 6.963            | 0.000   | 0.001        | 0.000       | 5.247              | 0.000   | 0.103        | 0.003       | 4.922                            | 0.000   | 0.062        | 0.004       | 0.590      | 0.913  | 1.114  | 0.498  | 0.434  | 0.697  | 0.423  | 0.558  | 0.481  | 0.679  | 0.777  | 1.046  | 0.580  | 0.117  | 0.539  | 0.610  | 1.001  | 0.966  | 1.617  | 1.855  | 0.689  | 0.442 |       |
| Saa1_1146 | YP_019195 | Entericidin Ecb                                              | -0.068 | 1  |                  |         |              |             | 9.622              | 0.000   | 0.108        | 0.006       |                                  |         |              |             |            |        |        |        |        |        |        |        |        |        |        |        |        |        |        |        |        |        |        |        |        |       |       |
| Saa1_0617 | YP_015871 | phosphoserine aminotransferase                               | -0.862 | 17 | -11.402          | 0.000   | 0.000        | 0.000       | -5.889             | 0.000   | 0.117        | 0.005       | -5.299                           | 0.000   | 0.036        | 0.002       |            |        |        |        |        |        |        |        |        |        |        |        |        |        |        |        |        |        |        |        |        |       |       |
| Saa1_1229 | YP_016277 | polyhydroxyalkoate synthase repressor, PhaR                  | 1.298  | 11 | 6.757            | 0.000   | 0.048        | 0.000       | 5.972              | 0.002   | 1.000        | 0.029       | 6.007                            | 0.000   | 0.030        | 0.002       |            |        |        |        |        |        |        |        |        |        |        |        |        |        |        |        |        |        |        |        |        |       |       |
| Saa1_1913 | YP_016958 | TonB-dependent receptor                                      | 0.706  | 20 | 8.195            | 0.000   | 0.000        | 0.000       | 6.017              | 0.000   | 0.026        | 0.002       | 5.146                            | 0.000   | 0.035        | 0.002       | 0.915      | 1.544  | 1.099  | 0.827  | 0.700  | 0.673  | 0.469  | 0.761  | 0.387  | 0.646  | 0.436  | 0.384  | 0.054  | 0.205  | 0.155  | 0.431  | 1.038  | 0.959  | 0.796  | 0.916  | 1.651  | 0.861 | 0.366 |
| Saa1_2845 | YP_017883 | transcription termination factor Rho                         | 0.778  | 20 | 6.963            | 0.000   | 0.001        | 0.000       | 5.247              | 0.000   | 0.103        | 0.003       | 4.922                            | 0.000   | 0.062        | 0.004       | 0.590      | 0.913  | 1.114  | 0.498  | 0.434  | 0.697  | 0.423  | 0.558  | 0.481  | 0.679  | 0.777  | 1.046  | 0.580  | 0.117  | 0.539  | 0.610  | 1.001  | 0.966  | 1.617  | 1.855  | 0.689  | 0.442 |       |
| Saa1_1146 | YP_019195 | Entericidin Ecb                                              | -0.068 | 1  |                  |         |              |             | 9.622              | 0.000   | 0.108        | 0.006       |                                  |         |              |             |            |        |        |        |        |        |        |        |        |        |        |        |        |        |        |        |        |        |        |        |        |       |       |
| Saa1_0617 | YP_015871 | phosphoserine aminotransferase                               | -0.862 | 17 | -11.402          | 0.000   | 0.000        | 0.000       | -5.889             | 0.000   | 0.117        | 0.005       | -5.299                           | 0.000   | 0.036        | 0.002       |            |        |        |        |        |        |        |        |        |        |        |        |        |        |        |        |        |        |        |        |        |       |       |
| Saa1_1229 | YP_016277 | polyhydroxyalkoate synthase repressor, PhaR                  | 1.298  | 11 | 6.757            | 0.000   | 0.048        | 0.000       | 5.972              | 0.002   | 1.000        | 0.029       | 6.007                            | 0.000   | 0.030        | 0.002       |            |        |        |        |        |        |        |        |        |        |        |        |        |        |        |        |        |        |        |        |        |       |       |
| Saa1_1913 | YP_016958 | TonB-dependent receptor                                      | 0.706  | 20 | 8.195            | 0.000   | 0.000        | 0.000       | 6.017              | 0.000   | 0.026        | 0.002       | 5.146                            | 0.000   | 0.035        | 0.002       | 0.915      | 1.544  | 1.099  | 0.827  | 0.700  | 0.673  | 0.469  | 0.761  | 0.387  | 0.646  | 0.436  | 0.384  | 0.054  | 0.205  | 0.155  | 0.431  | 1.038  | 0.959  | 0.796  | 0.916  | 1.651  | 0.861 | 0.366 |
| Saa1_2845 | YP_017883 | transcription termination factor Rho                         | 0.778  | 20 | 6.963            | 0.000   | 0.001        | 0.000       | 5.247              | 0.000   | 0.103        | 0.003       | 4.922                            | 0.000   | 0.062        | 0.004       | 0.590      | 0.913  | 1.114  | 0.498  | 0.434  | 0.697  | 0.423  | 0.558  | 0.481  | 0.679  | 0.777  | 1.046  | 0.580  | 0.117  | 0.539  | 0.610  | 1.001  | 0.966  | 1.617  | 1.855  | 0.689  | 0.442 |       |
| Saa1_1146 | YP_019195 | Entericidin Ecb                                              | -0.068 | 1  |                  |         |              |             | 9.622              | 0.000   | 0.108        | 0.006       |                                  |         |              |             |            |        |        |        |        |        |        |        |        |        |        |        |        |        |        |        |        |        |        |        |        |       |       |
| Saa1_0617 | YP_015871 | phosphoserine aminotransferase                               | -0.862 | 17 | -11.402          | 0.000   | 0.000        | 0.000       | -5.889             | 0.000   | 0.117        | 0.005       | -5.299                           | 0.000   | 0.036        | 0.002       |            |        |        |        |        |        |        |        |        |        |        |        |        |        |        |        |        |        |        |        |        |       |       |
| Saa1_1229 | YP_016277 | polyhydroxyalkoate synthase repressor, PhaR                  | 1.298  | 11 | 6.757            | 0.000   | 0.048        | 0.000       | 5.972              | 0.002   | 1.000        | 0.029       | 6.007                            | 0.000   | 0.030        | 0.002       |            |        |        |        |        |        |        |        |        |        |        |        |        |        |        |        |        |        |        |        |        |       |       |
| Saa1_1913 | YP_016958 | TonB-dependent receptor                                      | 0.706  | 20 | 8.195            | 0.000   | 0.000        | 0.000       | 6.017              | 0.000   | 0.026        | 0.002       | 5.146                            | 0.000   | 0.035        | 0.002       | 0.915      | 1.544  | 1.099  | 0.827  | 0.700  | 0.673  | 0.469  | 0.761  | 0.387  | 0.646  | 0.436  | 0.384  | 0.054  |        |        |        |        |        |        |        |        |       |       |







| Locus Tag | Accession | Description                                                          | log2FC | N  | Student's t-test |         |              |             | Unmoderated t-test |         |              |             | Empirical Bayes moderated t-test |         |              |             | Experiment |        |        |        |       |        |        |        |       |        |        |        | mean  | stdev |        |        |        |        |        |        |        |       |  |
|-----------|-----------|----------------------------------------------------------------------|--------|----|------------------|---------|--------------|-------------|--------------------|---------|--------------|-------------|----------------------------------|---------|--------------|-------------|------------|--------|--------|--------|-------|--------|--------|--------|-------|--------|--------|--------|-------|-------|--------|--------|--------|--------|--------|--------|--------|-------|--|
|           |           |                                                                      |        |    | T-value          | p-value | p-value(BON) | q-value(ST) | T-value            | p-value | p-value(BON) | q-value(ST) | T-value                          | p-value | p-value(BON) | q-value(ST) | A1_1       | A1_2   | A2_1   | A2_2   | B1_1  | B1_2   | B2_1   | B2_2   | CI_1  | CI_2   | C2_1   | C2_2   |       |       | D1_1   | D1_2   | D2_1   | D2_2   | E_1    | E_2    | F_1    | F_2   |  |
| Sala_1970 | YP_017022 | Prolyl oligopeptidase                                                | -0.366 | 20 | -3.366           | 0.003   | 1.000        | 0.012       | -1.820             | 0.090   | 1.000        | 0.281       | -1.852                           | 0.076   | 1.000        | 0.245       | -0.998     | -0.681 | -0.739 | -0.069 | 0.020 | -0.377 | -0.632 | -0.441 | 0.607 | -0.248 | -0.280 | -0.267 | 0.265 | 0.343 | -0.278 | -0.521 | -0.540 | -0.465 | -0.753 | -0.924 | -0.319 | 0.423 |  |
| Sala_2147 | YP_017189 | 2-nitropropane dioxygenase, NPD                                      | -0.629 | 3  | -3.509           | 0.072   | 1.000        | 0.103       | -4.433             |         |              |             | -2.080                           | 0.078   | 1.000        | 0.246       |            |        |        |        |       |        |        |        |       |        |        |        |       |       |        |        |        |        |        |        |        |       |  |
| Sala_2309 | YP_017351 | hypothetical protein                                                 | 0.762  | 8  | 3.476            | 0.010   | 1.000        | 0.026       | 1.529              | 0.177   | 1.000        | 0.373       | 1.934                            | 0.078   | 1.000        | 0.246       |            |        |        |        |       |        |        |        |       |        |        |        |       |       |        |        |        |        |        |        |        |       |  |
| Sala_0202 | YP_015259 | hypothetical protein                                                 | -1.112 | 1  |                  |         |              |             |                    |         |              |             | -2.111                           | 0.081   | 1.000        | 0.254       |            |        |        |        |       |        |        |        |       |        |        |        |       |       |        |        |        |        |        |        |        |       |  |
| Sala_0270 | YP_015326 | peptidase S10, serine carboxypeptidase                               | 1.112  | 1  |                  |         |              |             |                    |         |              |             | 2.112                            | 0.081   | 1.000        | 0.254       |            |        |        |        |       |        |        |        |       |        |        |        |       |       |        |        |        |        |        |        |        |       |  |
| Sala_1074 | YP_016066 | glyoxidase hydroxylase, family 3-like protein                        | 1.110  | 1  |                  |         |              |             |                    |         |              |             | 2.108                            | 0.082   | 1.000        | 0.254       |            |        |        |        |       |        |        |        |       |        |        |        |       |       |        |        |        |        |        |        |        |       |  |
| Sala_1656 | YP_016652 | AAA family ATPase, CDC48 subfamily                                   | -0.514 | 17 | -2.842           | 0.012   | 1.000        | 0.028       | -1.661             | 0.125   | 1.000        | 0.326       | -1.828                           | 0.088   | 1.000        | 0.254       |            |        |        |        |       |        |        |        |       |        |        |        |       |       |        |        |        |        |        |        |        |       |  |
| Sala_2194 | YP_017236 | Polymerase receptor                                                  | 0.980  | 11 | 1.994            | 0.074   | 1.000        | 0.104       | 1.628              | 0.155   | 1.000        | 0.363       | 1.866                            | 0.082   | 1.000        | 0.254       |            |        |        |        |       |        |        |        |       |        |        |        |       |       |        |        |        |        |        |        |        |       |  |
| Sala_2882 | YP_017920 | TorR1-dependent receptor                                             | 0.497  | 14 | 2.289            | 0.039   | 1.000        | 0.064       | 1.664              | 0.131   | 1.000        | 0.331       | 1.848                            | 0.081   | 1.000        | 0.254       |            |        |        |        |       |        |        |        |       |        |        |        |       |       |        |        |        |        |        |        |        |       |  |
| Sala_2344 | YP_017386 | codDNA-shock DNA-binding domain protein                              | 0.280  | 19 | 3.468            | 0.002   | 1.000        | 0.009       | 1.972              | 0.070   | 1.000        | 0.250       | 1.812                            | 0.083   | 1.000        | 0.257       |            |        |        |        |       |        |        |        |       |        |        |        |       |       |        |        |        |        |        |        |        |       |  |
| Sala_0269 | YP_015322 | protein of unknown function DUF933                                   | -1.096 | 1  |                  |         |              |             |                    |         |              |             | -2.081                           | 0.085   | 1.000        | 0.250       |            |        |        |        |       |        |        |        |       |        |        |        |       |       |        |        |        |        |        |        |        |       |  |
| Sala_1137 | YP_016186 | hypothetical protein                                                 | 0.287  | 17 | 4.545            | 0.000   | 0.373        | 0.002       | 2.069              | 0.063   | 1.000        | 0.234       | 1.904                            | 0.086   | 1.000        | 0.262       |            |        |        |        |       |        |        |        |       |        |        |        |       |       |        |        |        |        |        |        |        |       |  |
| Sala_1583 | YP_016629 | Protein-tyrosine kinase                                              | 0.315  | 14 | 2.344            | 0.036   | 1.000        | 0.060       | 1.942              | 0.088   | 1.000        | 0.278       | 1.820                            | 0.086   | 1.000        | 0.262       |            |        |        |        |       |        |        |        |       |        |        |        |       |       |        |        |        |        |        |        |        |       |  |
| Sala_0776 | YP_015829 | 2-nitropropane dioxygenase, NPD                                      | 0.302  | 14 | 4.397            | 0.001   | 0.689        | 0.004       | 2.126              | 0.059   | 1.000        | 0.232       | 1.812                            | 0.087   | 1.000        | 0.265       |            |        |        |        |       |        |        |        |       |        |        |        |       |       |        |        |        |        |        |        |        |       |  |
| Sala_0090 | YP_015149 | transcriptional regulator, MarR family                               | -0.996 | 3  | -2.581           | 0.123   | 1.000        | 0.150       | -1.176             |         |              |             | -1.998                           | 0.087   | 1.000        | 0.265       |            |        |        |        |       |        |        |        |       |        |        |        |       |       |        |        |        |        |        |        |        |       |  |
| Sala_2814 | YP_017852 | ribosomal protein S19                                                | 0.568  | 4  | 1.412            | 0.253   | 1.000        | 0.234       | 9.544              |         |              |             | 1.953                            | 0.088   | 1.000        | 0.265       |            |        |        |        |       |        |        |        |       |        |        |        |       |       |        |        |        |        |        |        |        |       |  |
| Sala_0017 | YP_015076 | alpha-beta hydrolase fold                                            | -0.519 | 10 | -0.755           | 0.469   | 1.000        | 0.343       | -1.748             | 0.131   | 1.000        | 0.331       | -1.835                           | 0.088   | 1.000        | 0.266       |            |        |        |        |       |        |        |        |       |        |        |        |       |       |        |        |        |        |        |        |        |       |  |
| Sala_1279 | YP_016326 | Cl-like protein                                                      | -0.398 | 9  | -2.565           | 0.033   | 1.000        | 0.058       | -1.825             | 0.142   | 1.000        | 0.346       | -1.820                           | 0.092   | 1.000        | 0.275       |            |        |        |        |       |        |        |        |       |        |        |        |       |       |        |        |        |        |        |        |        |       |  |
| Sala_1741 | YP_016787 | hypothetical protein                                                 | 0.477  | 16 | 2.329            | 0.034   | 1.000        | 0.059       | 1.612              | 0.135   | 1.000        | 0.337       | 1.770                            | 0.092   | 1.000        | 0.275       |            |        |        |        |       |        |        |        |       |        |        |        |       |       |        |        |        |        |        |        |        |       |  |
| Sala_2239 | YP_017281 | histidine triad (HTI) protein                                        | -0.559 | 4  | -3.674           | 0.027   | 1.000        | 0.065       | -8.233             | 0.077   | 1.000        | 0.265       | -1.918                           | 0.093   | 1.000        | 0.275       |            |        |        |        |       |        |        |        |       |        |        |        |       |       |        |        |        |        |        |        |        |       |  |
| Sala_3074 | YP_018111 | acyl-CoA dehydrogenase-like protein                                  | 0.392  | 12 | 1.627            | 0.132   | 1.000        | 0.156       | 1.786              | 0.108   | 1.000        | 0.303       | 1.797                            | 0.092   | 1.000        | 0.275       |            |        |        |        |       |        |        |        |       |        |        |        |       |       |        |        |        |        |        |        |        |       |  |
| Sala_0946 | YP_015728 | ATP synthase F1, alpha subunit                                       | -0.056 | 30 | -4.056           | 0.001   | 0.708        | 0.004       | -1.887             | 0.080   | 1.000        | 0.268       | -1.967                           | 0.091   | 1.000        | 0.281       |            |        |        |        |       |        |        |        |       |        |        |        |       |       |        |        |        |        |        |        |        |       |  |
| Sala_3032 | YP_018006 | succinate dehydrogenase, flavoprotein subunit                        | -0.295 | 20 | -3.412           | 0.003   | 1.000        | 0.011       | -1.805             | 0.093   | 1.000        | 0.281       | -1.742                           | 0.094   | 1.000        | 0.278       |            |        |        |        |       |        |        |        |       |        |        |        |       |       |        |        |        |        |        |        |        |       |  |
| Sala_0156 | YP_015213 | thioredoxin                                                          | -0.548 | 4  | -7.108           | 0.006   | 1.000        | 0.018       | -12.934            | 0.000   | 0.111        | 0.001       | -1.887                           | 0.097   | 1.000        | 0.280       |            |        |        |        |       |        |        |        |       |        |        |        |       |       |        |        |        |        |        |        |        |       |  |
| Sala_0512 | YP_015586 | glutathione S-transferase-like protein                               | 0.638  | 4  | 3.431            | 0.042   | 1.000        | 0.067       | 2.126              | 0.167   | 1.000        | 0.367       | 1.889                            | 0.097   | 1.000        | 0.280       |            |        |        |        |       |        |        |        |       |        |        |        |       |       |        |        |        |        |        |        |        |       |  |
| Sala_0542 | YP_015596 | ribosomal protein S15                                                | 0.555  | 4  | 1.614            | 0.205   | 1.000        | 0.206       | 5.535              | 0.001   | 0.725        | 0.017       | 1.889                            | 0.097   | 1.000        | 0.280       |            |        |        |        |       |        |        |        |       |        |        |        |       |       |        |        |        |        |        |        |        |       |  |
| Sala_1505 | YP_015332 | nitroacrylamide hydrolase, F subunit                                 | -0.568 | 3  | -2.755           | 0.022   | 1.000        | 0.044       | -1.960             | 0.091   | 1.000        | 0.281       | -1.960                           | 0.091   | 1.000        | 0.280       |            |        |        |        |       |        |        |        |       |        |        |        |       |       |        |        |        |        |        |        |        |       |  |
| Sala_3059 | YP_018006 | cystathionine beta-lyase                                             | 0.651  | 3  | 0.669            | 0.573   | 1.000        | 0.385       | 2.321              | 0.259   | 1.000        | 0.441       | 1.937                            | 0.095   | 1.000        | 0.280       |            |        |        |        |       |        |        |        |       |        |        |        |       |       |        |        |        |        |        |        |        |       |  |
| Sala_3185 | YP_018221 | 2-pyridylphenol 6-hydroxylase                                        | 0.777  | 2  | 2.129            | 0.280   | 1.000        | 0.248       | 1.980              | 0.097   | 1.000        | 0.280       | 1.980                            | 0.097   | 1.000        | 0.280       |            |        |        |        |       |        |        |        |       |        |        |        |       |       |        |        |        |        |        |        |        |       |  |
| Sala_0374 | YP_015430 | hydro-lyases, Fe-S type, tartratefumarate subfamily, alpha region    | -0.450 | 15 | -3.231           | 0.006   | 1.000        | 0.018       | -1.620             | 0.133   | 1.000        | 0.334       | -1.742                           | 0.098   | 1.000        | 0.282       |            |        |        |        |       |        |        |        |       |        |        |        |       |       |        |        |        |        |        |        |        |       |  |
| Sala_2375 | YP_017823 | UspA                                                                 | 0.598  | 5  | 1.047            | 0.354   | 1.000        | 0.290       | 2.144              | 0.121   | 1.000        | 0.321       | 1.845                            | 0.099   | 1.000        | 0.284       |            |        |        |        |       |        |        |        |       |        |        |        |       |       |        |        |        |        |        |        |        |       |  |
| Sala_0846 | YP_015897 | R-methyltransferase, TrmH, group 3                                   | 0.372  | 12 | 3.059            | 0.011   | 1.000        | 0.027       | 1.777              | 0.126   | 1.000        | 0.326       | 1.751                            | 0.099   | 1.000        | 0.284       |            |        |        |        |       |        |        |        |       |        |        |        |       |       |        |        |        |        |        |        |        |       |  |
| Sala_1347 | YP_016394 | Coproporphyrinogen oxidase                                           | -0.672 | 8  | -2.878           | 0.024   | 1.000        | 0.045       | -1.502             | 0.193   | 1.000        | 0.379       | -1.787                           | 0.100   | 1.000        | 0.284       |            |        |        |        |       |        |        |        |       |        |        |        |       |       |        |        |        |        |        |        |        |       |  |
| Sala_0044 | YP_015103 | type I phosphodiesterase/nucleotide pyrophosphatase                  | 0.275  | 17 | 3.492            | 0.003   | 1.000        | 0.011       | 1.858              | 0.088   | 1.000        | 0.278       | 1.708                            | 0.103   | 1.000        | 0.284       |            |        |        |        |       |        |        |        |       |        |        |        |       |       |        |        |        |        |        |        |        |       |  |
| Sala_2281 | YP_017323 | hypothetical protein                                                 | -0.470 | 9  | -3.665           | 0.006   | 1.000        | 0.019       | -1.577             | 0.166   | 1.000        | 0.367       | -1.761                           | 0.102   | 1.000        | 0.288       |            |        |        |        |       |        |        |        |       |        |        |        |       |       |        |        |        |        |        |        |        |       |  |
| Sala_2389 | YP_017431 | Leucyl aminopeptidase                                                | -0.702 | 5  | -3.106           | 0.036   | 1.000        | 0.060       | -1.065             | 0.216   | 1.000        | 0.404       | -1.807                           | 0.102   | 1.000        | 0.288       |            |        |        |        |       |        |        |        |       |        |        |        |       |       |        |        |        |        |        |        |        |       |  |
| Sala_2945 | YP_017983 | glutaryl-tRNA synthetase                                             | 0.621  | 9  | 3.772            | 0.005   | 1.000        | 0.017       | 1.540              | 0.184   | 1.000        | 0.376       | 1.751                            | 0.102   | 1.000        | 0.288       |            |        |        |        |       |        |        |        |       |        |        |        |       |       |        |        |        |        |        |        |        |       |  |
| Sala_0629 | YP_015683 | acyl hydroperoxide reductase/Thiol specific antioxidant/Mai allergen | 0.308  | 18 | 4.551            | 0.000   | 0.270        | 0.002       | 1.747              | 0.102   | 1.000        | 0.297       | 1.702                            | 0.103   | 1.000        | 0.288       |            |        |        |        |       |        |        |        |       |        |        |        |       |       |        |        |        |        |        |        |        |       |  |
| Sala_0190 | YP_015247 | glucose-6-phosphate 1-dehydrogenase                                  | -0.397 | 16 | -3.472           | 0.003   | 1.000        | 0.012       | -3.164             | 0.128   | 1.00         |             |                                  |         |              |             |            |        |        |        |       |        |        |        |       |        |        |        |       |       |        |        |        |        |        |        |        |       |  |





| Locus Tag | Accession | Description                                                    | log2FC | N   | Student's t-test |         |              |             | Unmoderated t-test |         |              |             | Empirical Bayes moderated t-test |         |              |             | Experiment |        |        |        |        |        |        |        |        |        |        |        | mean   | stdev  |        |        |        |        |        |        |        |        |        |        |
|-----------|-----------|----------------------------------------------------------------|--------|-----|------------------|---------|--------------|-------------|--------------------|---------|--------------|-------------|----------------------------------|---------|--------------|-------------|------------|--------|--------|--------|--------|--------|--------|--------|--------|--------|--------|--------|--------|--------|--------|--------|--------|--------|--------|--------|--------|--------|--------|--------|
|           |           |                                                                |        |     | T-value          | p-value | p-value(BON) | q-value(ST) | T-value            | p-value | p-value(BON) | q-value(ST) | T-value                          | p-value | p-value(BON) | q-value(ST) | A1_1       | A1_2   | A2_1   | A2_2   | B1_1   | B1_2   | B2_1   | B2_2   | C1_1   | C1_2   | C2_1   | C2_2   |        |        | D1_1   | D1_2   | D2_1   | D2_2   | E_1    | E_2    | F_1    | F_2    |        |        |
| Sala_1170 | YP_016219 | CTP synthase                                                   | -0.287 | 17  | -2.108           | 0.051   | 1.000        | 0.078       | -1.050             | 0.315   | 1.000        | 0.478       | -1.121                           | 0.275   | 1.000        | 0.431       | -0.984     | -0.331 | -0.797 | -0.319 | -0.552 | -0.437 | -0.025 | -1.098 | -0.049 | 0.749  | 0.450  | 0.329  | 0.218  | -0.319 | -0.396 | -0.491 | -0.249 | -0.252 | 0.483  |        |        |        |        |        |
| Sala_1213 | YP_016262 | Ribonuclease III                                               | 0.039  | 5   | 3.081            | 0.037   | 1.000        | 0.061       | 1.736              | 0.181   | 1.000        | 0.373       | 1.168                            | 0.274   | 1.000        | 0.431       |            |        |        |        |        |        |        | 0.771  | 0.405  | 0.447  | 0.258  | 0.118  |        |        |        |        |        | -0.380 | 0.276  |        |        |        |        |        |
| Sala_1630 | YP_016976 | Peptidoglycan glycosyltransferase                              | -0.633 | 1   |                  |         |              |             |                    |         |              |             | -1.202                           | 0.276   | 1.000        | 0.431       |            |        |        |        |        |        |        |        |        |        |        |        |        |        |        |        |        |        | -0.633 |        |        |        |        |        |
| Sala_1902 | YP_016947 | ribosomal protein L9                                           | 0.189  | 19  | 1.159            | 0.267   | 1.000        | 0.237       | 1.159              | 0.267   | 1.000        | 0.443       | 1.115                            | 0.276   | 1.000        | 0.431       | -0.446     | 0.288  | 0.208  | 0.088  | 0.137  | 0.215  | -0.097 | 0.106  | -0.317 | 0.039  | -0.162 | 0.198  | -0.138 | -0.171 | 0.249  | -0.248 | -0.210 | 1.220  | 1.527  | 0.100  | 0.488  |        |        |        |
| Sala_1404 | YP_016451 | Cytochrome c oxidase                                           | 0.631  | 1   |                  |         |              |             |                    |         |              |             | 1.197                            | 0.278   | 1.000        | 0.432       |            |        |        |        |        |        |        |        |        |        |        |        |        |        |        |        |        |        | 0.631  |        |        |        |        |        |
| Sala_1980 | YP_017005 | ribosomal protein S2                                           | 0.181  | 19  | 1.104            | 0.284   | 1.000        | 0.250       | 1.175              | 0.261   | 1.000        | 0.441       | 1.110                            | 0.278   | 1.000        | 0.432       | -0.183     | -0.118 | 0.097  | 0.111  | 0.063  | -0.434 | -0.244 | 0.212  | 0.322  | 0.244  | -0.100 | -0.204 | -0.052 | 0.202  | -0.203 | -0.052 | -0.065 | 1.235  | 1.418  | 0.181  | 0.468  |        |        |        |
| Sala_2732 | YP_017770 | signal recognition particle-docking protein FlaY               | 0.631  | 1   |                  |         |              |             |                    |         |              |             | -1.198                           | 0.278   | 1.000        | 0.432       |            |        |        |        |        |        |        |        |        |        |        |        |        |        |        |        |        |        | 0.631  |        |        |        |        |        |
| Sala_0484 | YP_016548 | hypothetical protein                                           | 0.133  | 20  | 3.035            | 0.007   | 1.000        | 0.020       | 1.497              | 0.156   | 1.000        | 0.363       | 1.108                            | 0.279   | 1.000        | 0.432       | -0.411     | 0.106  | 0.116  | -0.135 | 0.060  | 0.144  | 0.283  | 0.230  | 0.282  | -0.112 | 0.070  | 0.237  | 0.197  | 0.261  | 0.343  | 0.389  | 0.155  | 0.032  | 0.378  | 0.015  | 0.131  | 0.183  |        |        |
| Sala_0461 | YP_016515 | ATPase                                                         | -0.626 | 1   |                  |         |              |             |                    |         |              |             | -1.189                           | 0.281   | 1.000        | 0.432       |            |        |        |        |        |        |        |        |        |        |        |        |        |        |        |        |        |        |        | -0.626 |        |        |        |        |
| Sala_0687 | YP_015741 | alpha/beta hydrolase fold                                      | -0.342 | 3   | -2.248           | 0.154   | 1.000        | 0.172       | -1.651             |         |              |             | -1.171                           | 0.281   | 1.000        | 0.432       |            |        |        |        |        |        |        |        |        |        |        |        |        |        |        |        |        |        |        | -0.342 | 0.263  |        |        |        |
| Sala_1784 | YP_016929 | Secretion protein Hyd                                          | 0.523  | 2   | 5.083            | 0.124   | 1.000        | 0.150       | 2.429              | 0.249   | 1.000        | 0.439       | 1.172                            | 0.281   | 1.000        | 0.432       |            |        |        |        |        |        |        |        |        |        |        |        |        |        |        |        |        |        | 0.523  | 0.146  |        |        |        |        |
| Sala_2782 | YP_017820 | phenylalanyl-tRNA synthetase, alpha subunit                    | 0.641  | 6   | 0.744            | 0.491   | 1.000        | 0.350       | 0.781              | 0.492   | 1.000        | 0.594       | 1.143                            | 0.280   | 1.000        | 0.432       |            |        |        |        |        |        |        |        |        |        |        |        |        |        |        |        |        |        | 0.641  | 1.553  |        |        |        |        |
| Sala_1032 | YP_016082 | oxidoreductase FAD(D/P)-binding                                | -0.390 | 7   | -2.993           | 0.024   | 1.000        | 0.046       | -1.015             | 0.357   | 1.000        | 0.510       | -1.128                           | 0.284   | 1.000        | 0.435       |            |        |        |        |        |        |        |        |        |        |        |        |        |        |        |        |        |        | 0.007  | -0.501 | 0.197  | -0.758 | -0.562 | -0.834 |
| Sala_1477 | YP_016523 | 4-hydroxythreonine-4-phosphate dehydrogenase                   | 1.392  | 2   | -0.552           | 0.679   | 1.000        | 0.428       |                    |         |              |             | 1.182                            | 0.284   | 1.000        | 0.435       |            |        |        |        |        |        |        |        |        |        |        |        |        |        |        |        |        |        |        | 1.392  | 0.428  |        |        |        |
| Sala_1809 | YP_016854 | acetyl-CoA acetyltransferase                                   | 0.621  | 1   |                  |         |              |             |                    |         |              |             | 1.180                            | 0.285   | 1.000        | 0.435       |            |        |        |        |        |        |        |        |        |        |        |        |        |        |        |        |        |        |        | 0.621  |        |        |        |        |
| Sala_2949 | YP_017987 | L-2,4-diaminobutyric acid acetyltransferase                    | 0.172  | 19  | 1.728            | 0.101   | 1.000        | 0.129       | 1.178              | 0.260   | 1.000        | 0.441       | 1.094                            | 0.286   | 1.000        | 0.435       | -0.052     | 0.173  | 0.479  | 0.605  | 0.248  | 0.337  | 0.076  | -0.164 | -0.891 | -0.409 | -0.155 | 0.294  | 0.026  | 0.432  | 0.345  | 0.201  | -0.031 | 0.666  | 0.892  | 0.162  | 0.408  |        |        |        |
| Sala_2388 | YP_015120 | Penicillin amidase                                             | 0.617  | 1   |                  |         |              |             |                    |         |              |             | 1.172                            | 0.287   | 1.000        | 0.437       |            |        |        |        |        |        |        |        |        |        |        |        |        |        |        |        |        |        |        | 0.617  |        |        |        |        |
| Sala_2833 | YP_017871 | hypothetical protein                                           | 0.340  | 10  | 0.938            | 0.373   | 1.000        | 0.299       | 0.959              | 0.382   | 1.000        | 0.534       | 1.107                            | 0.287   | 1.000        | 0.437       |            |        |        |        |        |        |        |        |        |        |        |        |        |        |        |        |        |        |        | 0.340  |        |        |        |        |
| Sala_1062 | YP_016112 | acetyl-CoA carboxylase, carboxyl transferase, beta subunit     | 0.393  | 6   | 1.750            | 0.140   | 1.000        | 0.163       | 0.860              | 0.453   | 1.000        | 0.577       | 1.122                            | 0.289   | 1.000        | 0.438       |            |        |        |        |        |        |        |        |        |        |        |        |        |        |        |        |        |        |        | 0.393  |        |        |        |        |
| Sala_1669 | YP_016715 | cytochrome oxidase maturation protein, cb3-3-type              | 0.615  | 1   |                  |         |              |             |                    |         |              |             | 1.167                            | 0.289   | 1.000        | 0.438       |            |        |        |        |        |        |        |        |        |        |        |        |        |        |        |        |        |        |        | 0.615  |        |        |        |        |
| Sala_0958 | YP_016009 | alcohol dehydrogenase                                          | 0.192  | 17  | 1.804            | 0.090   | 1.000        | 0.119       | 1.109              | 0.289   | 1.000        | 0.457       | 1.079                            | 0.293   | 1.000        | 0.438       | 0.451      | 0.477  | 0.002  | 1.010  | 0.399  | 0.526  | 0.477  | -0.221 | 0.185  | 0.541  | -0.033 | -0.047 | 0.321  | -0.200 |        |        |        |        | 0.709  | -0.716 | -0.523 | 0.198  | 0.452  |        |
| Sala_1078 | YP_016128 | H <sup>+</sup> -transporting two-sector ATPase, B/B' subunit   | 0.140  | 6   | -2.025           | 0.113   | 1.000        | 0.140       | -1.171             | 0.113   | 1.000        | 0.460       | -1.025                           | 0.113   | 1.000        | 0.438       |            |        |        |        |        |        |        |        |        |        |        |        |        |        |        |        |        |        |        | -1.097 | -0.523 | 0.076  |        |        |
| Sala_1366 | YP_016413 | glucosamine-fructose-6-phosphate aminotransferase, isomerizing | -0.285 | 19  | -1.362           | 0.190   | 1.000        | 0.193       | -0.999             | 0.336   | 1.000        | 0.494       | -1.080                           | 0.292   | 1.000        | 0.438       | -0.021     | -0.839 | -0.531 | -0.600 | -0.826 | -0.040 | 0.243  | -0.332 | 0.138  | -0.476 | 0.075  | 1.596  | 1.140  | 0.368  | -0.436 | -0.449 | -0.533 | -0.808 | -1.162 | -0.217 | 0.693  |        |        |        |
| Sala_1777 | YP_016723 | OmpW                                                           | 0.255  | 18  | 0.868            | 0.398   | 1.000        | 0.312       | 1.079              | 0.292   | 1.000        | 0.479       | 1.079                            | 0.292   | 1.000        | 0.438       | 0.628      | 0.073  | -0.915 | -0.152 | 0.553  | 0.822  | 0.428  | 0.233  | 0.076  | -0.256 | -0.639 | -0.527 | -0.265 | -0.124 | -0.112 | 0.040  | 1.594  | 1.639  | 0.139  | 0.678  |        |        |        |        |
| Sala_1759 | YP_016805 | Nucleoside diphosphate kinase                                  | 0.194  | 13  | 1.591            | 0.138   | 1.000        | 0.160       | 1.150              | 0.284   | 1.000        | 0.457       | 1.086                            | 0.293   | 1.000        | 0.438       | 0.349      |        |        |        |        |        |        |        |        |        |        |        |        |        |        |        |        |        |        | 0.194  |        |        |        |        |
| Sala_2050 | YP_017092 | Uncharacterized P-loop ATPase protein UPF0042                  | 0.612  | 1   |                  |         |              |             |                    |         |              |             | 1.162                            | 0.293   | 1.000        | 0.438       |            |        |        |        |        |        |        |        |        |        |        |        |        |        |        |        |        |        |        | 0.612  |        |        |        |        |
| Sala_2057 | YP_017099 | DUF481                                                         | -0.056 | 369 | -1.056           | 0.369   | 1.000        | 0.296       | -0.940             | 0.520   | 1.000        | 0.610       | -1.134                           | 0.290   | 1.000        | 0.438       |            |        |        |        |        |        |        |        |        |        |        |        |        |        |        |        |        |        |        | -0.514 | 0.595  |        |        |        |
| Sala_1442 | YP_016448 | ribosomal protein L11                                          | 0.302  | 7   | 1.023            | 0.346   | 1.000        | 0.285       | 0.991              | 0.503   | 1.000        | 0.601       | 1.103                            | 0.294   | 1.000        | 0.438       |            |        |        |        |        |        |        |        |        |        |        |        |        |        |        |        |        |        |        | 0.388  |        |        |        |        |
| Sala_1668 | YP_016714 | oxygen-independent coproporphyrinogen III oxidase              | -0.608 | 1   |                  |         |              |             |                    |         |              |             | -1.154                           | 0.294   | 1.000        | 0.438       |            |        |        |        |        |        |        |        |        |        |        |        |        |        |        |        |        |        |        |        | -0.608 |        |        |        |
| Sala_1956 | YP_017001 | undecaprenyl diphosphate synthase                              | 0.416  | 6   | 1.829            | 0.127   | 1.000        | 0.152       | 0.878              | 0.473   | 1.000        | 0.586       | 1.103                            | 0.296   | 1.000        | 0.441       | 0.894      | 0.849  |        |        |        |        | 1.055  | -0.298 |        |        |        |        |        |        |        |        |        |        |        |        | -0.056 | 0.124  |        |        |
| Sala_0703 | YP_015846 | hydrazinase                                                    | 0.378  | 4   | 1.914            | 0.152   | 1.000        | 0.171       | 1.105              | 0.384   | 1.000        | 0.535       | 1.116                            | 0.298   | 1.000        | 0.442       |            |        |        |        |        |        |        |        |        |        |        |        |        |        |        |        |        |        |        |        | 0.378  |        |        |        |
| Sala_2287 | YP_017328 | ATP synthase F1, gamma subunit                                 | -0.191 | 18  | -2.339           | 0.032   | 1.000        | 0.056       | -1.083             | 0.300   | 1.000        | 0.463       | -1.065                           | 0.299   | 1.000        | 0.443       | 0.383      | 0.009  | -0.389 | -0.370 | -0.463 | 0.037  | 0.133  | -0.439 | -0.024 | -0.744 | -0.442 | -0.031 | -0.291 | -0.719 | -0.519 | -0.514 | 0.322  | 0.482  | -0.211 | 0.383  |        |        |        |        |
| Sala_1617 | YP_016663 | ribosomal ES 19 R-E loop binding protein CtlA25/TL5            | 0.191  | 20  | 1.096            | 0.287   | 1.000        | 0.251       | 1.072              | 0.302   | 1.000        | 0.465       | 1.061                            | 0.299   | 1.000        | 0.443       | 0.355      | 0.282  | 0.176  | 0.235  | -0.198 | -0.025 | 0.004  | 0.206  | 0.192  | -0.827 | -0.079 | 0.013  | -0.327 | -0.533 | -0.134 | 0.282  | 0.045  | 0.241  | 1.197  | 1.214  | 0.116  | 0.475  |        |        |
| Sala_0713 | YP_015767 | Leucyl aminopeptidase                                          | 0.597  | 1   |                  |         |              |             |                    |         |              |             | 1.133                            | 0.302   | 1.000        | 0.446       |            |        |        |        |        |        |        |        |        |        |        |        |        |        |        |        |        |        |        |        | 0.597  |        |        |        |
| Sala_2829 | YP_017867 | phosphoglycerate mutase 1 family                               | -0.182 | 18  | -1.809           | 0.088   | 1.000        | 0.117       | -1.093             | 0.296   | 1.000        | 0.460       | -1.056                           | 0.303   | 1.000        | 0.446       | -0.399     | 0.141  | -0.510 | 0.129  | 0.123  | -0.079 | 0.080  | 0.331  | -0.540 | -0.671 | -0.350 | 0.084  | 0.044  | 0.400  | -0.248 | -0.021 | -0.615 | -0.488 | -0.144 | 0.337  |        |        |        |        |
| Sala_0520 | YP_015574 | hypothetical protein                                           | 0.488  | 2   | 102.735          | 0.006   | 1.000        | 0.019       | 49.107             | 0.013   | 1.000        | 0.097       | 1.113                            | 0.304   | 1.000        |             |            |        |        |        |        |        |        |        |        |        |        |        |        |        |        |        |        |        |        |        |        |        |        |        |



| Locus Tag | Accession | Description                                           | log2FC | N  | Student's t-test |         |              |             | Unmoderated t-test |         |              |             | Empirical Bayes moderated t-test |         |              |             | Experiment |      |      |      |      |      |      |      |       |      |      |      | mean | stdev |      |      |      |      |     |     |     |     |
|-----------|-----------|-------------------------------------------------------|--------|----|------------------|---------|--------------|-------------|--------------------|---------|--------------|-------------|----------------------------------|---------|--------------|-------------|------------|------|------|------|------|------|------|------|-------|------|------|------|------|-------|------|------|------|------|-----|-----|-----|-----|
|           |           |                                                       |        |    | T-value          | p-value | p-value(BON) | q-value(ST) | T-value            | p-value | p-value(BON) | q-value(ST) | T-value                          | p-value | p-value(BON) | q-value(ST) | A1_1       | A1_2 | A2_1 | A2_2 | B1_1 | B1_2 | B2_1 | B2_2 | C1_1  | C1_2 | C2_1 | C2_2 |      |       | D1_1 | D1_2 | D2_1 | D2_2 | E_1 | E_2 | F_1 | F_2 |
| Sala_2711 | YP_017749 | hypothetical protein                                  | -0.424 | 1  |                  |         |              |             |                    |         |              |             | -0.805                           | 0.453   | 1.000        | 0.530       |            |      |      |      |      |      |      |      |       |      |      |      |      |       |      |      |      |      |     |     |     |     |
| Sala_0236 | YP_016250 | UTP-glucose 1-phosphate uridylyltransferase           | -0.197 | 6  | -0.106           | 0.920   | 1.000        | 0.504       | -0.702             | 0.533   | 1.000        | 0.618       | -0.774                           | 0.457   | 1.000        | 0.532       |            |      |      |      |      |      |      |      | 0.728 |      |      |      |      |       |      |      |      |      |     |     |     |     |
| Sala_1142 | YP_016191 | putative transcriptional regulator                    | 0.320  | 3  | 0.988            | 0.424   | 1.000        | 0.326       | 0.594              | 0.659   | 1.000        | 0.668       | 0.783                            | 0.457   | 1.000        | 0.532       |            |      |      |      |      |      |      |      |       |      |      |      |      |       |      |      |      |      |     |     |     |     |
| Sala_2176 | YP_017218 | permease YjP/YjgQ                                     | 0.421  | 1  |                  |         |              |             |                    |         |              |             | 0.800                            | 0.455   | 1.000        | 0.532       |            |      |      |      |      |      |      |      |       |      |      |      |      |       |      |      |      |      |     |     |     |     |
| Sala_2511 | YP_017551 | Mercuric transport protein periplasmic component      | -0.420 | 1  |                  |         |              |             |                    |         |              |             | -0.798                           | 0.456   | 1.000        | 0.532       |            |      |      |      |      |      |      |      |       |      |      |      |      |       |      |      |      |      |     |     |     |     |
| Sala_1136 | YP_016185 | hydroxymethylbutenyl pyrophosphate reductase          | 0.322  | 3  | 1.246            | 0.339   | 1.000        | 0.282       | 0.497              | 0.707   | 1.000        | 0.686       | 0.782                            | 0.461   | 1.000        | 0.534       |            |      |      |      |      |      |      |      |       |      |      |      |      |       |      |      |      |      |     |     |     |     |
| Sala_1257 | YP_016304 | Thymidylate kinase                                    | 0.447  | 1  |                  |         |              |             |                    |         |              |             | 0.792                            | 0.460   | 1.000        | 0.534       |            |      |      |      |      |      |      |      |       |      |      |      |      |       |      |      |      |      |     |     |     |     |
| Sala_3029 | YP_018006 | TorB-dependent receptor                               | -0.165 | 19 | -2.022           | 0.058   | 1.000        | 0.087       | -0.718             | 0.485   | 1.000        | 0.591       | -0.751                           | 0.460   | 1.000        | 0.534       |            |      |      |      |      |      |      |      |       |      |      |      |      |       |      |      |      |      |     |     |     |     |
| Sala_0638 | YP_015992 | aldehyde dehydrogenase                                | -0.214 | 8  | -1.632           | 0.147   | 1.000        | 0.168       | -0.796             | 0.456   | 1.000        | 0.579       | -0.756                           | 0.465   | 1.000        | 0.535       |            |      |      |      |      |      |      |      |       |      |      |      |      |       |      |      |      |      |     |     |     |     |
| Sala_1320 | YP_016367 | transketolase                                         | -0.191 | 15 | -1.205           | 0.248   | 1.000        | 0.232       | -0.686             | 0.510   | 1.000        | 0.608       | -0.750                           | 0.462   | 1.000        | 0.535       |            |      |      |      |      |      |      |      |       |      |      |      |      |       |      |      |      |      |     |     |     |     |
| Sala_1893 | YP_016739 | hypothetical protein                                  | -0.293 | 2  | -0.581           | 0.665   | 1.000        | 0.423       | -0.785             | 0.463   | 1.000        | 0.535       | -0.786                           | 0.463   | 1.000        | 0.535       |            |      |      |      |      |      |      |      |       |      |      |      |      |       |      |      |      |      |     |     |     |     |
| Sala_1847 | YP_016892 | hypothetical protein                                  | -0.237 | 6  | -0.174           | 0.871   | 1.000        | 0.493       | -0.907             | 0.431   | 1.000        | 0.566       | -0.763                           | 0.464   | 1.000        | 0.535       |            |      |      |      |      |      |      |      |       |      |      |      |      |       |      |      |      |      |     |     |     |     |
| Sala_2008 | YP_017052 | phosphoribosyltransferase                             | -0.536 | 7  | -6.879           | 0.000   | 0.444        | 0.003       | -0.956             | 0.410   | 1.000        | 0.555       | -0.759                           | 0.464   | 1.000        | 0.535       |            |      |      |      |      |      |      |      |       |      |      |      |      |       |      |      |      |      |     |     |     |     |
| Sala_1791 | YP_016836 | Methyltransferase type 12                             | 0.410  | 1  |                  |         |              |             |                    |         |              |             | 0.779                            | 0.467   | 1.000        | 0.535       |            |      |      |      |      |      |      |      |       |      |      |      |      |       |      |      |      |      |     |     |     |     |
| Sala_2301 | YP_017343 | hypothetical protein                                  | 0.919  | 2  | -0.867           | 0.545   | 1.000        | 0.375       | 0.781              | 0.466   | 1.000        | 0.535       | 0.781                            | 0.466   | 1.000        | 0.535       |            |      |      |      |      |      |      |      |       |      |      |      |      |       |      |      |      |      |     |     |     |     |
| Sala_2799 | YP_017837 | ribosomal protein L15                                 | 0.162  | 11 | 0.513            | 0.619   | 1.000        | 0.405       | 0.734              | 0.491   | 1.000        | 0.594       | 0.748                            | 0.466   | 1.000        | 0.535       |            |      |      |      |      |      |      |      |       |      |      |      |      |       |      |      |      |      |     |     |     |     |
| Sala_0208 | YP_016265 | phage shock B                                         | -0.250 | 3  | -0.145           | 0.898   | 1.000        | 0.499       | -2.441             | 0.031   | 1.000        | 0.165       | -0.759                           | 0.473   | 1.000        | 0.539       |            |      |      |      |      |      |      |      |       |      |      |      |      |       |      |      |      |      |     |     |     |     |
| Sala_0781 | YP_016584 | Acetyl-CoA C-acetyltransferase                        | 0.130  | 20 | 1.838            | 0.082   | 1.000        | 0.111       | 0.741              | 0.471   | 1.000        | 0.585       | 0.729                            | 0.473   | 1.000        | 0.539       |            |      |      |      |      |      |      |      |       |      |      |      |      |       |      |      |      |      |     |     |     |     |
| Sala_1208 | YP_016257 | protein of unknown function DUF205                    | -0.253 | 3  | -0.506           | 0.663   | 1.000        | 0.427       | -1.675             | 0.193   | 1.000        | 0.379       | -0.760                           | 0.473   | 1.000        | 0.539       |            |      |      |      |      |      |      |      |       |      |      |      |      |       |      |      |      |      |     |     |     |     |
| Sala_1407 | YP_016454 | pyridoxal phosphate biosynthetic protein PdxJ         | -0.199 | 7  | -1.340           | 0.229   | 1.000        | 0.220       | -0.717             | 0.513   | 1.000        | 0.508       | -0.743                           | 0.473   | 1.000        | 0.539       |            |      |      |      |      |      |      |      |       |      |      |      |      |       |      |      |      |      |     |     |     |     |
| Sala_1893 | YP_016938 | Pyridoxal 5'-phosphate-dependent enzyme, beta subunit | -0.130 | 17 | -1.388           | 0.184   | 1.000        | 0.190       | -0.753             | 0.468   | 1.000        | 0.583       | -0.733                           | 0.472   | 1.000        | 0.539       |            |      |      |      |      |      |      |      |       |      |      |      |      |       |      |      |      |      |     |     |     |     |
| Sala_2987 | YP_018025 | ferrous iron transport protein B                      | -0.410 | 1  |                  |         |              |             |                    |         |              |             | -0.766                           | 0.474   | 1.000        | 0.540       |            |      |      |      |      |      |      |      |       |      |      |      |      |       |      |      |      |      |     |     |     |     |
| Sala_0754 | YP_016507 | peptide chain release factor 3                        | 0.171  | 12 | 1.059            | 0.313   | 1.000        | 0.267       | 0.681              | 0.513   | 1.000        | 0.608       | 0.719                            | 0.483   | 1.000        | 0.542       |            |      |      |      |      |      |      |      |       |      |      |      |      |       |      |      |      |      |     |     |     |     |
| Sala_0769 | YP_015822 | Uncharacterized conserved protein UCP030820           | -0.157 | 9  | -1.324           | 0.222   | 1.000        | 0.217       | -0.739             | 0.493   | 1.000        | 0.595       | -0.723                           | 0.483   | 1.000        | 0.542       |            |      |      |      |      |      |      |      |       |      |      |      |      |       |      |      |      |      |     |     |     |     |
| Sala_1177 | YP_016226 | hypothetical protein                                  | 0.398  | 1  |                  |         |              |             |                    |         |              |             | 0.755                            | 0.480   | 1.000        | 0.542       |            |      |      |      |      |      |      |      |       |      |      |      |      |       |      |      |      |      |     |     |     |     |
| Sala_1220 | YP_016268 | Glyoxalase/biomycin resistance protein/dioxygenase    | 0.253  | 3  | 0.944            | 0.445   | 1.000        | 0.333       | 1.084              | 0.298   | 1.000        | 0.462       | 0.744                            | 0.482   | 1.000        | 0.542       |            |      |      |      |      |      |      |      |       |      |      |      |      |       |      |      |      |      |     |     |     |     |
| Sala_1654 | YP_016710 | TorB-dependent receptor                               | -0.399 | 4  |                  |         |              |             |                    |         |              |             | 0.757                            | 0.479   | 1.000        | 0.542       |            |      |      |      |      |      |      |      |       |      |      |      |      |       |      |      |      |      |     |     |     |     |
| Sala_1752 | YP_016796 | ribonuclease D                                        | 0.397  | 1  |                  |         |              |             |                    |         |              |             | 0.754                            | 0.481   | 1.000        | 0.542       |            |      |      |      |      |      |      |      |       |      |      |      |      |       |      |      |      |      |     |     |     |     |
| Sala_2112 | YP_017154 | protein of unknown function DUF1285                   | -0.421 | 2  | -0.962           | 0.512   | 1.000        | 0.361       | -0.460             | 0.726   | 1.000        | 0.694       | -0.748                           | 0.479   | 1.000        | 0.542       |            |      |      |      |      |      |      |      |       |      |      |      |      |       |      |      |      |      |     |     |     |     |
| Sala_2139 | YP_017181 | hypothetical protein                                  | -0.146 | 11 | -1.442           | 0.180   | 1.000        | 0.188       | -0.719             | 0.499   | 1.000        | 0.599       | -0.728                           | 0.478   | 1.000        | 0.542       |            |      |      |      |      |      |      |      |       |      |      |      |      |       |      |      |      |      |     |     |     |     |
| Sala_2813 | YP_017851 | ribosomal protein L22                                 | 0.299  | 6  | 0.979            | 0.383   | 1.000        | 0.304       | 0.736              | 0.481   | 1.000        | 0.542       | 0.736                            | 0.481   | 1.000        | 0.542       |            |      |      |      |      |      |      |      |       |      |      |      |      |       |      |      |      |      |     |     |     |     |
| Sala_2213 | YP_017255 | peptidase M24                                         | 0.214  | 11 | 1.369            | 0.148   | 1.000        | 0.158       | 0.584              | 0.516   | 1.000        | 0.610       | 0.717                            | 0.485   | 1.000        | 0.543       |            |      |      |      |      |      |      |      |       |      |      |      |      |       |      |      |      |      |     |     |     |     |
| Sala_0798 | YP_016585 | ATP-dependent protease La                             | -0.123 | 20 | -2.037           | 0.056   | 1.000        | 0.084       | -0.725             | 0.481   | 1.000        | 0.589       | -0.708                           | 0.486   | 1.000        | 0.544       |            |      |      |      |      |      |      |      |       |      |      |      |      |       |      |      |      |      |     |     |     |     |
| Sala_0019 | YP_015078 | Glyoxalase/biomycin resistance protein/dioxygenase    | 0.390  | 1  |                  |         |              |             |                    |         |              |             | 0.740                            | 0.488   | 1.000        | 0.546       |            |      |      |      |      |      |      |      |       |      |      |      |      |       |      |      |      |      |     |     |     |     |
| Sala_1769 | YP_016815 | Sua5/YgO/YrxC/YwC                                     | 0.389  | 1  |                  |         |              |             |                    |         |              |             | 0.739                            | 0.489   | 1.000        | 0.546       |            |      |      |      |      |      |      |      |       |      |      |      |      |       |      |      |      |      |     |     |     |     |
| Sala_1254 | YP_016301 | Lytic murein transglycosylase                         | 0.269  | 9  | 1.366            | 0.209   | 1.000        | 0.207       | 0.582              | 0.579   | 1.000        | 0.641       | 0.711                            | 0.490   | 1.000        | 0.546       |            |      |      |      |      |      |      |      |       |      |      |      |      |       |      |      |      |      |     |     |     |     |
| Sala_1836 | YP_016981 | Glyoxalase/biomycin resistance protein/dioxygenase    | 0.199  | 4  | 4.166            | 0.025   | 1.000        | 0.047       | 4.815              | 0.027   | 1.000        | 0.047       | 0.723                            | 0.491   | 1.000        | 0.547       |            |      |      |      |      |      |      |      |       |      |      |      |      |       |      |      |      |      |     |     |     |     |
| Sala_0674 | YP_015728 | Fts assembly protein SufB                             | -0.177 | 9  | -0.224           | 0.837   | 1.000        | 0.482       | -1.436             | 0.287   | 1.000        | 0.457       | -0.718                           | 0.494   | 1.000        | 0.549       |            |      |      |      |      |      |      |      |       |      |      |      |      |       |      |      |      |      |     |     |     |     |
| Sala_1308 | YP_016355 | NADH dehydrogenase I, D subunit                       | -0.177 | 9  | -0.514           | 0.621   | 1.000        | 0.406       | -0.679             | 0.528   | 1.000        | 0.614       | -0.705                           | 0.494   | 1.000        | 0.549       |            |      |      |      |      |      |      |      |       |      |      |      |      |       |      |      |      |      |     |     |     |     |
| Sala_2512 | YP_017552 | Mercuric reductase MerA                               | -0.357 | 6  | -1.037           | 0.347   | 1.000        | 0.286       | -0.523             | 0.629   | 1.000        | 0.637       | -0.710                           | 0.494   | 1.000        | 0.549       |            |      |      |      |      |      |      |      |       |      |      |      |      |       |      |      |      |      |     |     |     |     |
| Sala_1380 | YP_016427 | Aspartate racemase                                    | -0.222 | 10 | 0.003            | 0.997   | 1.000        | 0.524       | -0.618             | 0.556   | 1.000        | 0.631       | -0.701                           | 0.495   | 1.000        | 0.549       |            |      |      |      |      |      |      |      |       |      |      |      |      |       |      |      |      |      |     |     |     |     |
| Sala_0649 | YP_015703 | Prin-like protein                                     | 0.284  | 2  | 3.297            | 0.187   | 1.000        | 0.192       | 0                  |         |              |             |                                  |         |              |             |            |      |      |      |      |      |      |      |       |      |      |      |      |       |      |      |      |      |     |     |     |     |







| Locus Tag | Accession | Description                                                              | log2FC | N  | Student's t-test |         |              |             | Unmoderated t-test |         |              |             | Empirical Bayes moderated t-test |         |              |             | Experiment |        |        |        |        |        |        |        |        |        |        |        | mean   | stdev  |        |        |        |        |        |        |       |     |  |  |  |
|-----------|-----------|--------------------------------------------------------------------------|--------|----|------------------|---------|--------------|-------------|--------------------|---------|--------------|-------------|----------------------------------|---------|--------------|-------------|------------|--------|--------|--------|--------|--------|--------|--------|--------|--------|--------|--------|--------|--------|--------|--------|--------|--------|--------|--------|-------|-----|--|--|--|
|           |           |                                                                          |        |    | T-value          | p-value | p-value(BON) | q-value(ST) | T-value            | p-value | p-value(BON) | q-value(ST) | T-value                          | p-value | p-value(BON) | q-value(ST) | A1_1       | A1_2   | A2_1   | A2_2   | B1_1   | B1_2   | B2_1   | B2_2   | C1_1   | C1_2   | C2_1   | C2_2   |        |        | D1_1   | D1_2   | D2_1   | D2_2   | E_1    | E_2    | F_1   | F_2 |  |  |  |
| Sala_2801 | YP_017839 | ribosomal protein S5                                                     | 0.053  | 17 | -0.137           | 0.893   | 1.000        | 0.497       | 0.275              | 0.789   | 1.000        | 0.718       | 0.275                            | 0.786   | 1.000        | 0.666       | 0.073      | -0.165 | -0.285 | -0.040 | -0.046 | -0.020 | -0.431 | -0.360 |        |        | 0.154  | -0.239 | -0.639 | 0.358  | 0.103  | -0.069 | -0.172 | 0.000  | 1.152  | -0.015 | 0.439 |     |  |  |  |
| Sala_1265 | YP_016302 | rare lipoprotein A                                                       | 0.126  | 2  | 1.084            | 0.474   | 1.000        | 0.344       | 0.518              | 0.788   | 1.000        | 0.667       | 0.280                            | 0.788   | 1.000        | 0.667       |            |        |        |        |        |        |        |        |        |        |        |        |        |        |        |        |        |        |        |        |       |     |  |  |  |
| Sala_1537 | YP_016563 | acyl-CoA dehydrogenase-like protein                                      | 0.041  | 18 | 0.735            | 0.473   | 1.000        | 0.343       | 0.308              | 0.763   | 1.000        | 0.711       | 0.272                            | 0.788   | 1.000        | 0.667       | -0.077     | -0.202 | 0.248  | 0.199  | 0.576  | 0.189  | 0.340  | 0.620  | 0.201  | -0.089 | 0.050  | -0.480 | -0.031 |        |        |        |        |        |        |        |       |     |  |  |  |
| Sala_0659 | YP_015713 | Chromatinase synthase                                                    | -0.131 | 2  | -0.623           | 0.645   | 1.000        | 0.416       | -0.298             | 0.816   | 1.000        | 0.725       | -0.278                           | 0.789   | 1.000        | 0.667       |            |        |        |        |        |        |        |        |        |        |        |        |        |        |        |        |        |        |        |        |       |     |  |  |  |
| Sala_2838 | YP_017876 | DNA polymerase III, epsilon subunit                                      | -0.146 | 1  |                  |         |              |             |                    |         |              |             | -0.278                           | 0.791   | 1.000        | 0.668       |            |        |        |        |        |        |        |        | -0.146 |        |        |        |        |        |        |        |        |        |        |        |       |     |  |  |  |
| Sala_0196 | YP_015223 | alkyl hydroperoxide reductase / Thiol specific antioxidant/ Mal allergen | 0.075  | 3  | -2.950           | 0.098   | 1.000        | 0.236       | 1.072              | 0.478   | 1.000        | 0.588       | 0.273                            | 0.793   | 1.000        | 0.668       |            |        |        |        |        |        |        |        |        | -1.344 |        |        |        |        |        |        |        |        |        |        |       |     |  |  |  |
| Sala_0274 | YP_015330 | hypothetical protein                                                     | 0.115  | 7  | 0.474            | 0.652   | 1.000        | 0.419       | 0.204              | 0.852   | 1.000        | 0.741       | 0.264                            | 0.797   | 1.000        | 0.668       |            |        |        |        |        |        |        |        | 0.128  | 0.730  | -1.049 |        |        |        |        |        |        |        |        |        |       |     |  |  |  |
| Sala_0514 | YP_015568 | Trans-hexaprenyltransferase                                              | -0.307 | 5  | -3.842           | 0.018   | 1.000        | 0.038       | -0.237             | 0.828   | 1.000        | 0.731       | -0.269                           | 0.794   | 1.000        | 0.668       |            |        |        |        |        |        |        |        | -0.220 |        |        |        |        |        |        |        |        |        |        |        |       |     |  |  |  |
| Sala_0933 | YP_015984 | peptidase S8, prolyl oligopeptidase active site region                   | 0.061  | 18 | 0.366            | 0.719   | 1.000        | 0.439       | 0.266              | 0.792   | 1.000        | 0.724       | 0.266                            | 0.792   | 1.000        | 0.668       | -0.429     | -0.502 | 0.352  | 0.346  | -0.074 | 0.060  | -1.069 |        | 0.309  | 0.358  | 0.667  | -0.120 | -0.610 |        |        |        |        |        |        |        |       |     |  |  |  |
| Sala_1829 | YP_016874 | hypothetical protein                                                     | -0.319 | 2  | -5.010           | 0.125   | 1.000        | 0.151       | -0.271             | 0.796   | 1.000        | 0.722       | -0.271                           | 0.796   | 1.000        | 0.668       |            |        |        |        |        |        |        |        |        |        |        |        |        |        |        |        |        |        |        |        |       |     |  |  |  |
| Sala_2727 | YP_017176 | ribosomal protein S16                                                    | 0.049  | 15 | -0.348           | 0.733   | 1.000        | 0.445       | 0.267              | 0.795   | 1.000        | 0.722       | 0.267                            | 0.795   | 1.000        | 0.668       | -0.121     | -0.191 | -0.223 | -0.655 | -0.071 | -0.611 | -0.294 | -0.214 |        |        |        |        |        |        |        |        |        |        |        |        |       |     |  |  |  |
| Sala_2728 | YP_017176 | signal recognition particle protein                                      | 0.068  | 11 | 0.614            | 0.553   | 1.000        | 0.378       | 0.237              | 0.820   | 1.000        | 0.727       | 0.264                            | 0.795   | 1.000        | 0.668       | 0.292      |        |        |        |        |        |        |        | 0.236  | 1.444  |        |        |        |        |        |        |        |        |        |        |       |     |  |  |  |
| Sala_0333 | YP_015339 | Holliday junction DNA helicase RuvB                                      | 0.317  | 2  | -0.607           | 0.652   | 1.000        | 0.419       | 0.269              | 0.797   | 1.000        | 0.724       | 0.269                            | 0.797   | 1.000        | 0.668       |            |        |        |        |        |        |        |        | 0.052  |        |        |        |        |        |        |        |        |        |        |        |       |     |  |  |  |
| Sala_2319 | YP_017361 | peptidase U62, modulator of DNA gyrase                                   | 0.058  | 16 | 0.399            | 0.696   | 1.000        | 0.431       | 0.251              | 0.806   | 1.000        | 0.724       | 0.259                            | 0.798   | 1.000        | 0.668       | 0.344      | -0.119 | 0.592  | 0.802  | -0.163 | 0.076  | -0.141 | 0.348  | -0.403 | -0.045 | -1.158 |        | 0.498  |        |        |        |        |        |        |        |       |     |  |  |  |
| Sala_1428 | YP_016473 | glycine cleavage T protein (aminomethyl transferase)                     | 0.141  | 2  | 0.366            | 0.777   | 1.000        | 0.459       | 0.175              | 0.890   | 1.000        | 0.751       | 0.263                            | 0.801   | 1.000        | 0.669       |            |        |        |        |        |        |        |        | -0.245 | 0.527  |        |        |        |        |        |        |        |        |        |        |       |     |  |  |  |
| Sala_0004 | YP_015063 | 60 kDa inner membrane insertion protein                                  | -0.040 | 17 | -0.669           | 0.513   | 1.000        | 0.361       | -0.230             | 0.821   | 1.000        | 0.673       | -0.230                           | 0.821   | 1.000        | 0.673       | 0.024      | -0.433 | -0.295 | 0.190  | 0.267  | 0.038  | 0.141  | 0.120  | -0.195 | -0.431 | -0.063 | 0.291  | 0.303  | -0.466 | -0.363 | 0.094  | 0.039  |        |        |        |       |     |  |  |  |
| Sala_0253 | YP_015039 | heat-inducible transcription repressor HcA                               | 0.086  | 2  | 0.480            | 0.715   | 1.000        | 0.436       | 0.230              | 0.826   | 1.000        | 0.673       | 0.230                            | 0.826   | 1.000        | 0.673       |            |        |        |        |        |        |        |        | 0.093  |        |        |        |        |        |        |        |        |        |        |        |       |     |  |  |  |
| Sala_0367 | YP_015423 | protein of unknown function DUF1013                                      | 0.052  | 13 | 0.300            | 0.770   | 1.000        | 0.457       | 0.219              | 0.831   | 1.000        | 0.732       | 0.228                            | 0.823   | 1.000        | 0.673       | 0.024      |        |        |        |        |        |        |        | -0.550 |        |        |        |        |        |        |        |        |        |        |        |       |     |  |  |  |
| Sala_0395 | YP_015450 | Ferritin and Dps                                                         | -0.129 | 1  |                  |         |              |             | -0.246             | 0.815   | 1.000        | 0.673       | -0.246                           | 0.815   | 1.000        | 0.673       |            |        |        |        |        |        |        |        |        |        |        |        |        |        |        |        |        |        |        |        |       |     |  |  |  |
| Sala_0478 | YP_015532 | hypothetical protein                                                     | 0.059  | 8  | 0.376            | 0.718   | 1.000        | 0.439       | 0.195              | 0.858   | 1.000        | 0.742       | 0.226                            | 0.825   | 1.000        | 0.673       | 0.422      | -0.715 |        |        |        |        |        |        | 0.066  |        |        |        |        |        |        |        |        |        |        |        |       |     |  |  |  |
| Sala_0480 | YP_015534 | ABC transporter related                                                  | 0.132  | 1  |                  |         |              |             | 0.250              | 0.811   | 1.000        | 0.673       | 0.250                            | 0.811   | 1.000        | 0.673       |            |        |        |        |        |        |        |        |        |        |        |        |        |        |        |        |        |        |        |        |       |     |  |  |  |
| Sala_0508 | YP_015550 | aminotransferase, class I and II                                         | 0.131  | 2  | -0.962           | 0.512   | 1.000        | 0.361       | -0.460             | 0.726   | 1.000        | 0.694       | -0.240                           | 0.813   | 1.000        | 0.673       |            |        |        |        |        |        |        |        |        |        |        |        |        |        |        |        |        |        |        |        |       |     |  |  |  |
| Sala_0556 | YP_015610 | methyl-accepting chemotaxis sensory transducer                           | 0.045  | 7  | 0.518            | 0.623   | 1.000        | 0.406       | 0.341              | 0.750   | 1.000        | 0.705       | 0.236                            | 0.818   | 1.000        | 0.673       |            |        |        |        |        |        |        |        | 0.293  |        |        |        |        |        |        |        |        |        |        |        |       |     |  |  |  |
| Sala_0558 | YP_015612 | alanine hydroxylase                                                      | -0.093 | 20 | 0.618            | 0.544   | 1.000        | 0.375       | -0.198             | 0.846   | 1.000        | 0.740       | -0.222                           | 0.826   | 1.000        | 0.673       | -0.295     | 0.665  | 1.183  | 1.235  | 1.414  | 0.938  | 1.139  | 0.870  | 0.135  | 0.195  | 0.975  | 1.103  | 0.756  | 0.360  | 1.038  | 0.638  | 0.162  | 0.137  | -4.457 | -4.610 |       |     |  |  |  |
| Sala_0808 | YP_015861 | TonB-like protein                                                        | -0.051 | 13 | -1.629           | 0.129   | 1.000        | 0.154       | -0.245             | 0.813   | 1.000        | 0.725       | -0.240                           | 0.813   | 1.000        | 0.673       | -0.058     |        |        |        |        |        |        |        |        |        |        |        |        |        |        |        |        |        |        |        |       |     |  |  |  |
| Sala_1008 | YP_016148 | amidohydrolyase                                                          | 0.057  | 12 | 0.337            | 0.743   | 1.000        | 0.448       | 0.238              | 0.833   | 1.000        | 0.732       | 0.233                            | 0.819   | 1.000        | 0.673       |            |        |        |        |        |        |        |        |        |        |        |        |        |        |        |        |        |        |        |        |       |     |  |  |  |
| Sala_1118 | YP_016347 | nitric oxide-binding protein, family 1                                   | 0.041  | 9  | -0.167           | 0.869   | 1.000        | 0.493       | -0.256             | 0.803   | 1.000        | 0.744       | -0.256                           | 0.803   | 1.000        | 0.673       | -0.200     | 0.100  | 0.352  | -0.054 | 0.422  | 0.502  | 0.014  | 0.727  | -0.215 | -0.169 | -0.362 | -0.659 | 0.134  | -0.508 |        |        |        |        |        |        |       |     |  |  |  |
| Sala_1301 | YP_016348 | NADH-quinone oxidoreductase, chain I                                     | -0.075 | 13 | -0.142           | 0.890   | 1.000        | 0.497       | -0.193             | 0.851   | 1.000        | 0.741       | -0.222                           | 0.827   | 1.000        | 0.673       | -0.024     | -0.050 |        |        |        |        |        |        |        |        |        |        |        |        |        |        |        |        |        |        |       |     |  |  |  |
| Sala_1424 | YP_016471 | aspartyl protease-like protein                                           | 0.126  | 1  |                  |         |              |             | 0.239              | 0.819   | 1.000        | 0.673       | 0.239                            | 0.819   | 1.000        | 0.673       |            |        |        |        |        |        |        |        |        |        |        |        |        |        |        |        |        |        |        |        |       |     |  |  |  |
| Sala_1475 | YP_016521 | adenosylmethionine-8-amino-7-oxononate aminotransferase                  | 0.134  | 1  |                  |         |              |             | 0.255              | 0.808   | 1.000        | 0.673       | 0.255                            | 0.808   | 1.000        | 0.673       |            |        |        |        |        |        |        |        | 0.134  |        |        |        |        |        |        |        |        |        |        |        |       |     |  |  |  |
| Sala_1489 | YP_016535 | hypothetical protein                                                     | 0.127  | 1  |                  |         |              |             | 0.242              | 0.817   | 1.000        | 0.673       | 0.242                            | 0.817   | 1.000        | 0.673       |            |        |        |        |        |        |        |        |        |        |        |        |        |        |        |        |        |        |        |        |       |     |  |  |  |
| Sala_1513 | YP_016559 | cytochrome c biogenesis factor                                           | 0.131  | 2  | 0.301            | 0.814   | 1.000        | 0.473       | 0.144              | 0.909   | 1.000        | 0.756       | 0.234                            | 0.822   | 1.000        | 0.673       |            |        |        |        |        |        |        |        |        |        |        |        |        |        |        |        |        |        |        |        |       |     |  |  |  |
| Sala_1598 | YP_016642 | transcriptional regulator, XRE family                                    | 0.046  | 17 | 0.552            | 0.589   | 1.000        | 0.393       | 0.249              | 0.808   | 1.000        | 0.724       | 0.247                            | 0.807   | 1.000        | 0.673       |            |        |        |        |        |        |        |        |        |        |        |        |        |        |        |        |        |        |        |        |       |     |  |  |  |
| Sala_1717 | YP_016763 | protein of unknown function DUF847                                       | 0.143  | 4  | 0.147            | 0.892   | 1.000        | 0.497       | 0.242              | 0.810   | 1.000        | 0.756       | 0.242                            | 0.810   | 1.000        | 0.673       | -0.478     | 0.195  | 0.507  | -0.095 | -0.385 | 0.192  | -0.325 | 0.005  | 0.469  | -0.028 | 0.462  | 0.021  | 0.093  | -0.206 | 0.659  | 0.486  | -0.477 | -0.242 |        |        |       |     |  |  |  |
| Sala_1801 | YP_016846 | hypothetical protein                                                     | 0.099  | 5  | -0.458           | 0.670   | 1.000        | 0.424       | 0.166              | 0.879   | 1.000        | 0.747       | 0.233                            | 0.821   | 1.000        | 0.673       |            |        |        |        |        |        |        |        |        |        |        |        |        |        |        |        |        |        |        |        |       |     |  |  |  |
| Sala_1812 | YP_016857 | 20S proteasome, A and B subunits                                         | -0.133 | 1  |                  |         |              |             | -0.252             | 0.810   | 1.000        | 0.673       | -0.252                           | 0.810   | 1.000        |             |            |        |        |        |        |        |        |        |        |        |        |        |        |        |        |        |        |        |        |        |       |     |  |  |  |



1 **Supplemental Figure Legends**

2

3 Supplemental FIG. S1. **Inverse metabolic labeling workflow of experiments A-D**

4 **for 10°C vs 30°C experiments.** *S. alaskensis* cells grown at 10°C and 30°C were

5 metabolically labeled during growth in unlabeled ( $^{14}\text{NH}_4\text{Cl}$ ) and labeled (99%

6 enriched  $^{15}\text{NH}_4\text{Cl}$ ) media where all other sources of N had been eliminated. 10°C and

7 30°C samples were combined 1:1  $^{14}\text{N}:$  $^{15}\text{N}$  as cell pellets with OD, 0.3 ( $\lambda = 433\text{nm}$ ) in

8 4 biological replicates (experiments A-D) representing 16 technical replicates in either

9 a Tris (experiments A-B) or urea (experiments C-D) protein extraction buffer. GeLC-

10 MS/MS was used as a platform for protein separation and MS analysis, followed by

11 protein identification, quantitation, and intra-experimental normalization and

12 statistical testing.

13

14 Supplemental FIG. S2. **Inverse metabolic labeling workflow of experiments E-F**

15 **for 10°C vs 30°C experiments.** *S. alaskensis* cells were processed as for experiments

16 A-D (Supplemental Fig. S1), with the exception that proteins from the 10°C and 30°C

17 samples were extracted separately in a Tris extraction buffer and combined 1:1

18  $^{14}\text{N}:$  $^{15}\text{N}$  based on protein concentration. Two biological replicates, representing 4

19 technical replicates were processed.

20

21 Supplemental FIG. S3. **Q-Q plots of the 30°C vs 30°C dataset.** The observed  $^{14}\text{N}:$  $^{15}\text{N}$

22 ratio of each protein was plotted (y-axis) against the theoretical value expected under

23 a normal distribution (x-axis). The majority of the data points lie along the straight

24 line, indicating that they are consistent with a normal distribution. However, the tails

25 of the distribution show that the observed protein ratios are heavy tailed, most likely

26 caused by the detection of a larger number of proteins with large ratios than would be  
27 expected for a normal distribution. **A.** Three 1:1  $^{14}\text{N}$ : $^{15}\text{N}$  experiments; **B.** Three 0.8:1  
28 experiments; **C.** Three 1.2:1 experiments.

29

30 Supplemental FIG. S4. **MA plots of peptides and proteins pre- and post-**  
31 **normalization for 30°C vs 30°C data.** See legend for Fig. 2.

32

33 Supplemental FIG. S5. **MA plots of peptides and proteins pre- and post-**  
34 **normalization for skewed 10°C vs 30°C data.** See legend for Fig. 2.

35

36 Supplemental FIG. S6. **MA plots of peptides and proteins pre- and post-**  
37 **normalization for non-skewed 10°C vs 30°C data.** See legend for Fig. 2.

38

39 Supplemental FIG. S7. **Histograms of raw unadjusted p-values arising from the**  
40 **testing of each protein for differential abundance in 10°C vs 30°C experiments.** In  
41 order to determine the appropriate significance test to adjust for the multiple-  
42 hypothesis testing in an experiment, a histogram of unadjusted p-values must be  
43 examined. The dashed line is the expected density of each bin if all the proteins were  
44 null (none of the proteins are differentially abundant) ( $H_0$ ). The estimated proportion  
45 of truly null hypotheses ( $\pi_0$ ) (dotted line), indicates that a large number of proteins  
46 show evidence for differential abundance, *i.e.* there are a large number of true  
47 alternate hypotheses ( $H_1$ ). **A.** A Student's t-test with a simple linear model accounting  
48 only for  $^{14}\text{N}$  and  $^{15}\text{N}$  label reversal; **B.** An unmoderated t-test with the full linear  
49 model; **C.** An empirical Bayes moderated t-test with the full linear model.

## Supplemental Figures

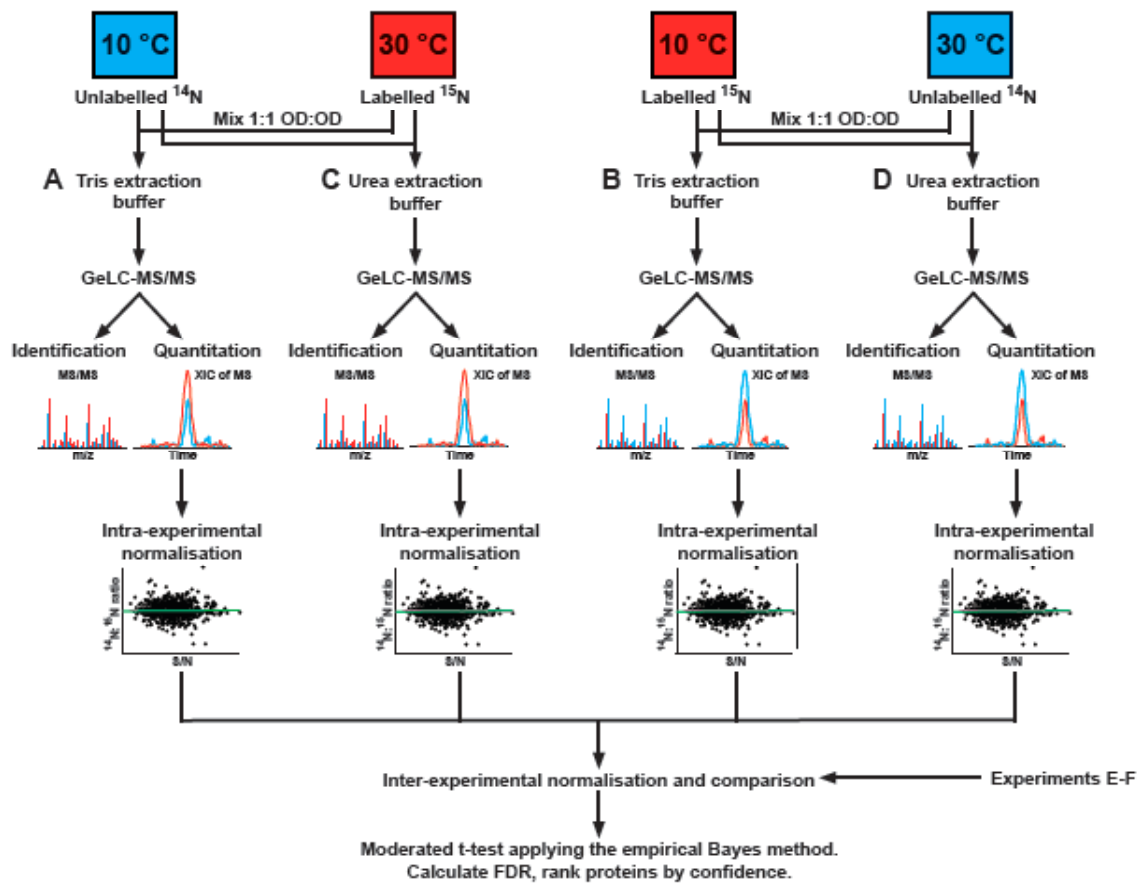

Supplemental FIG. S1.

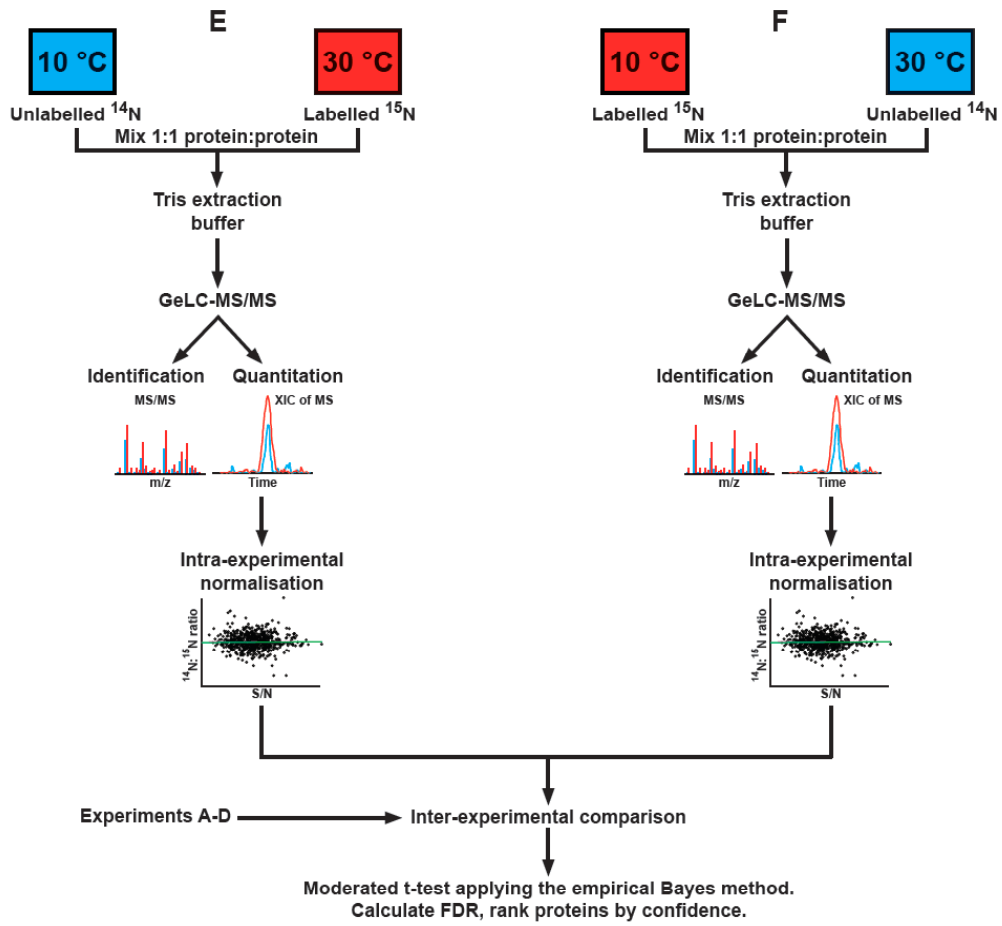

Supplemental FIG. S2.



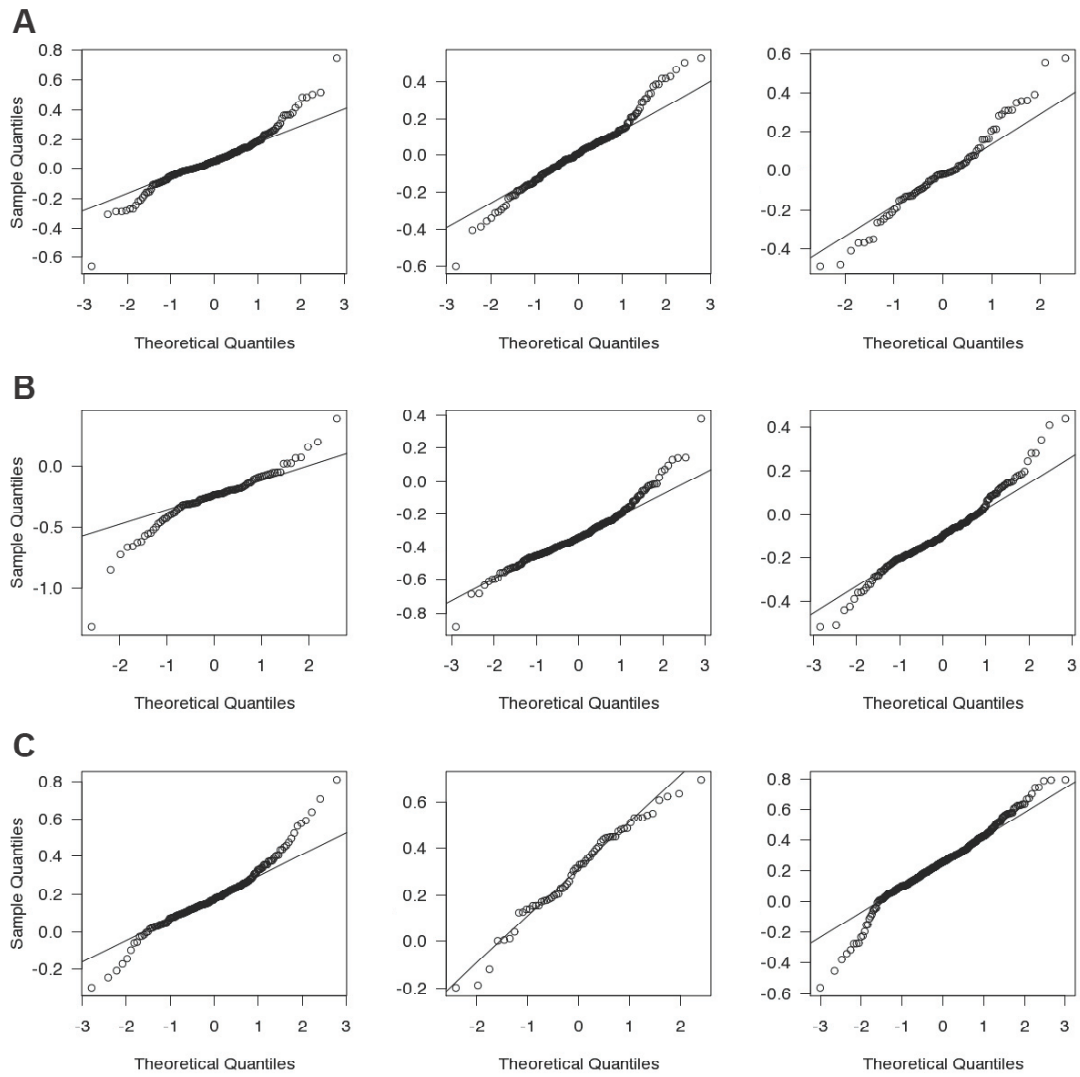

Supplemental FIG. S3.

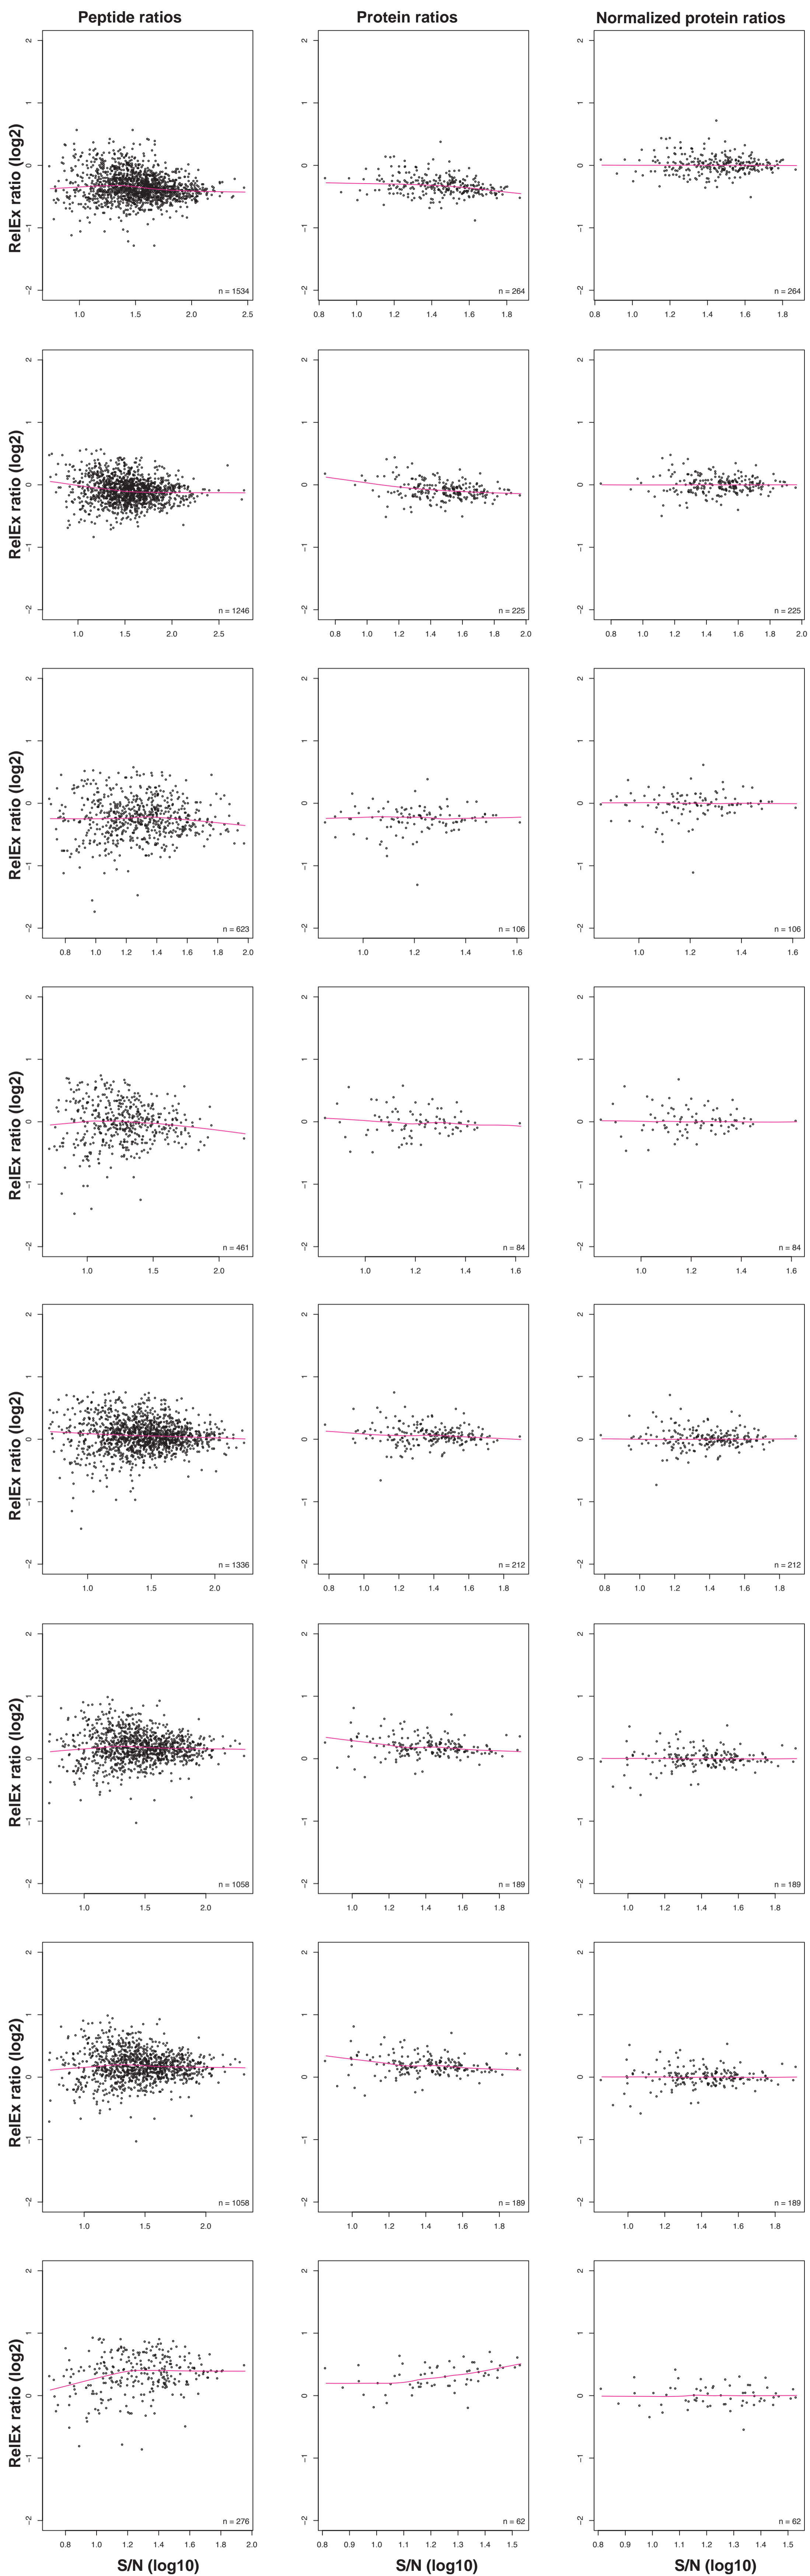

Supplemental Fig.S4

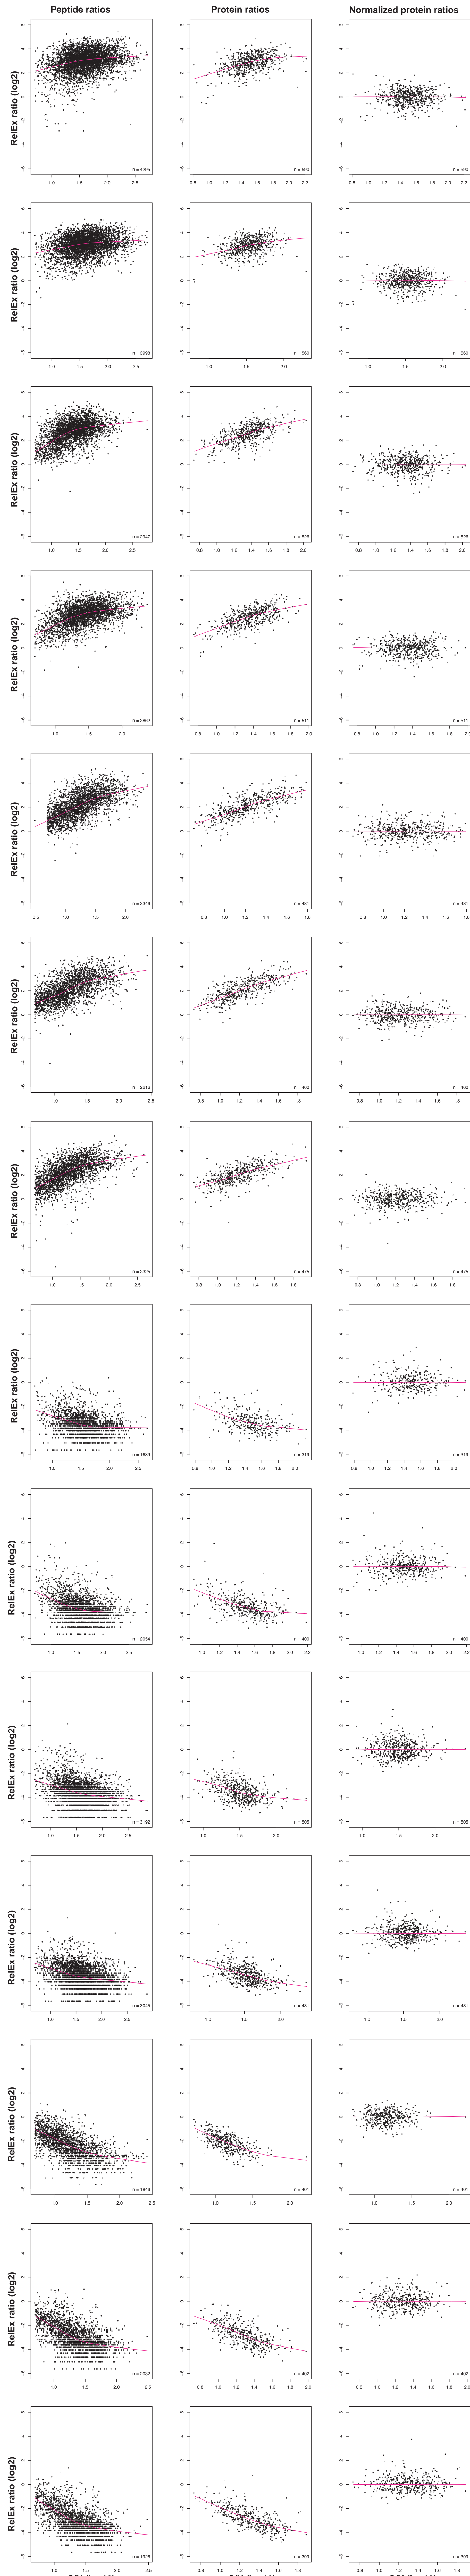

Supplemental Fig. S5

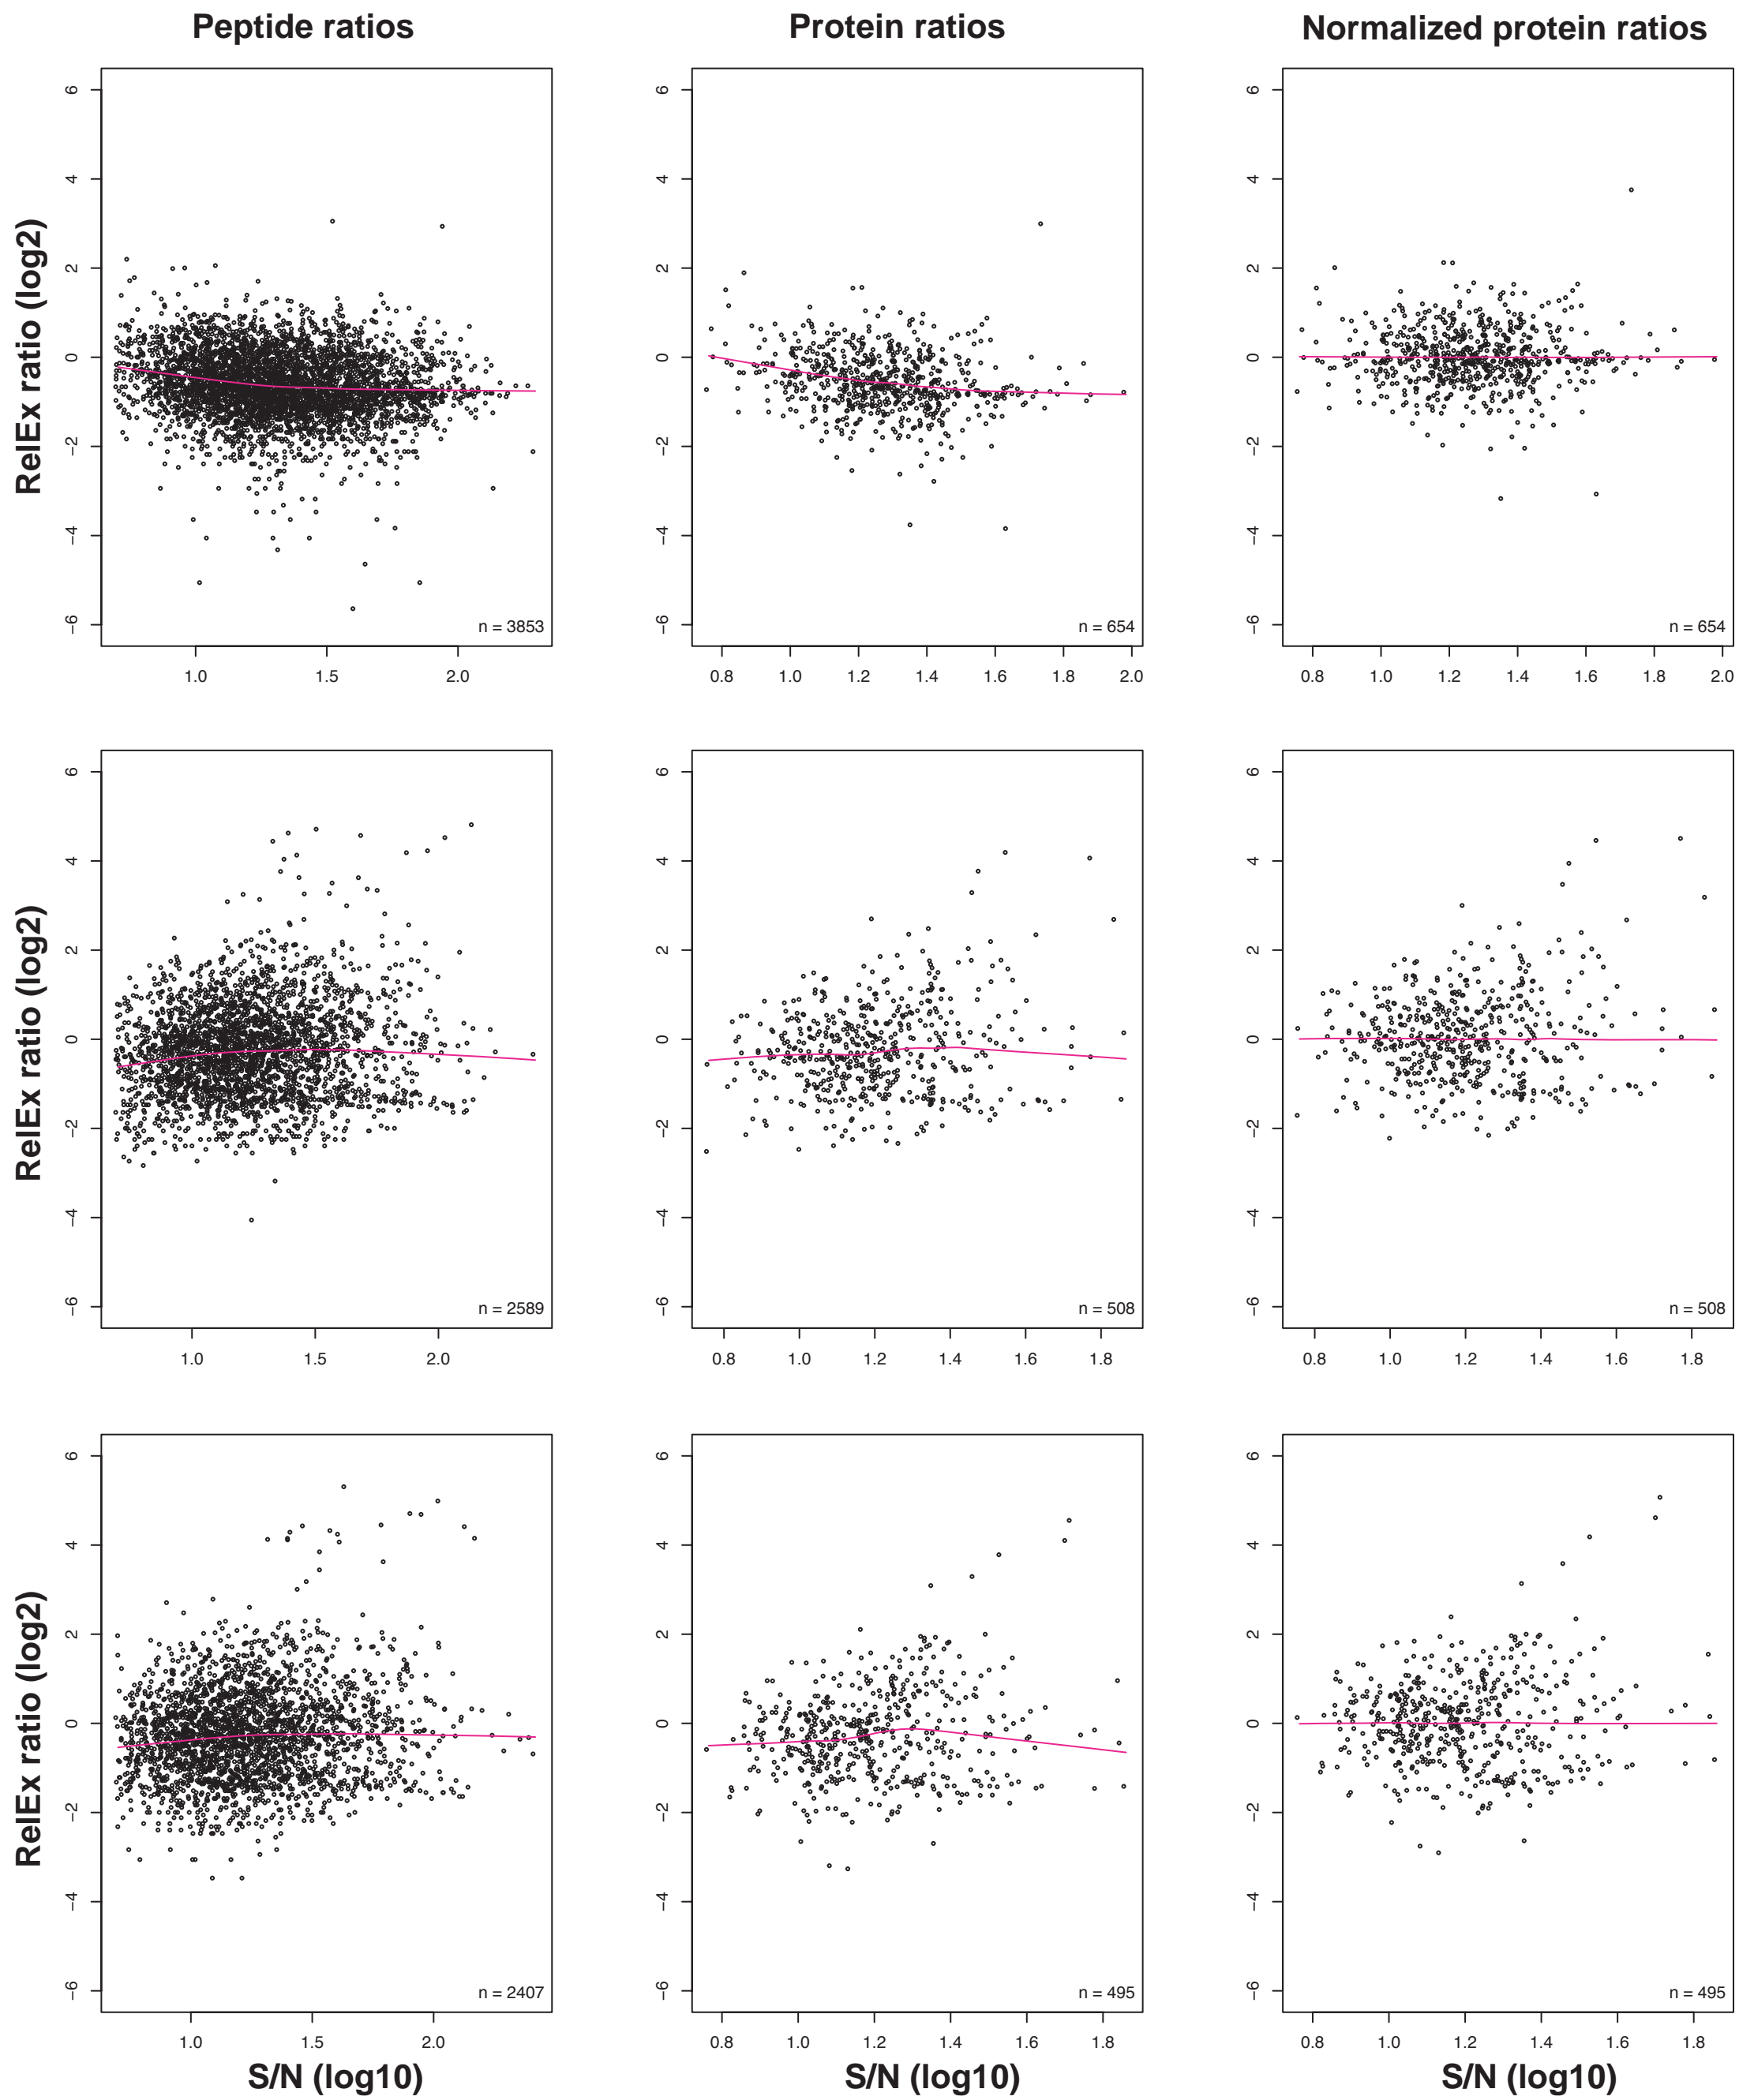

Supplemental Fig.S6

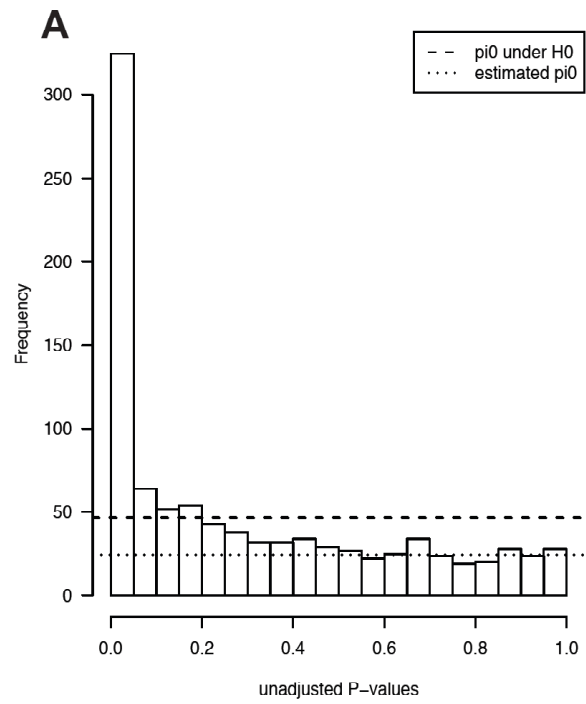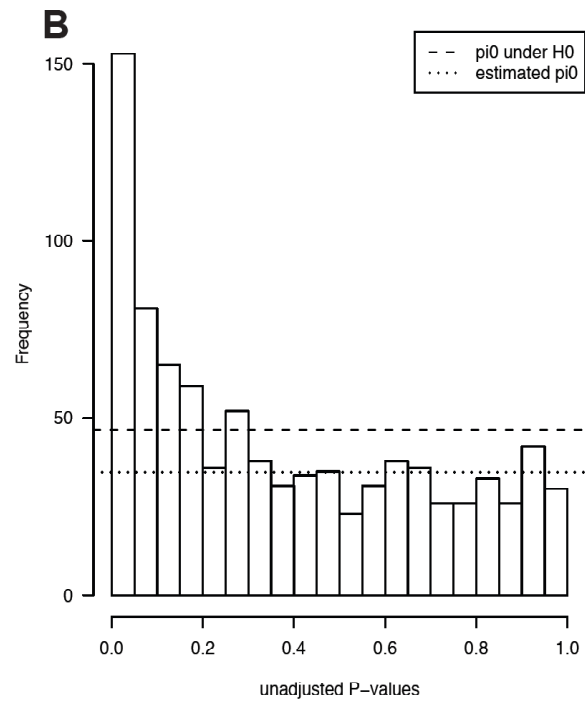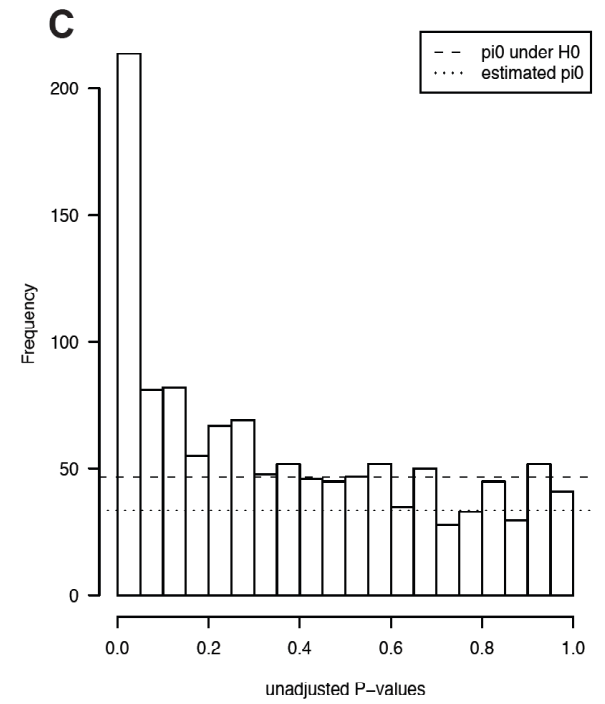

1

2 Supplemental FIG. S7.
